# Supplementary material for: Comparative Proteomic Analysis of Plasma Membrane Proteins in Rice Leaves Reveals a Vesicle Trafficking Network in Plant Immunity That Is Provoked by Blast Fungi
Source: Front Plant Sci. 2022 Apr 25;13:853195. doi: 10.3389/fpls.2022.853195 (PMC9083198; doi:10.3389/fpls.2022.853195)
Supplement: Supplementary file 1 [file Table_1.XLSX]

## Sheet: Sheet1
Supplemental Table S1. The iTRAQ labeling details.
Type	REF	0h-1	0h-2	0h-3	24h-1	24h-2	24h-3
iTRAQ labeling	113	114	115	116	117	118	119
REF: internal control (mixed with 0h-1, 0h-2, 0h-3, 24h-1, 24h-2 and 24h-3)
