# Supplementary material for: Comparative Proteomic Analysis of Plasma Membrane Proteins in Rice Leaves Reveals a Vesicle Trafficking Network in Plant Immunity That Is Provoked by Blast Fungi
Source: Front Plant Sci. 2022 Apr 25;13:853195. doi: 10.3389/fpls.2022.853195 (PMC9083198; doi:10.3389/fpls.2022.853195)
Supplement: Supplementary file 2 [file Table_2.XLSX]

## Sheet: Sheet1
Supplemental Table S2. The parameters of quantitative analysis by Proteome Discoverer1.3
Item	Value
peak integration	Integration Window Tolerance: 20 ppm
	Integration Method: Most Confident Centroid
Scan Event Filters	Mass Analyzer: FTMS
	MS Order: MS2
	Activation Type: HCD
Ratio Calculation	Show the Raw Quan Values = False
	Minimum Quan Value Threshold: = 0
	Replace Missing Quan Values With Minimum Intensity = False
	Use Single-Peak Quan Channels = False
	Apply Quan Value Corrections = True
	Reject All Quan Values If Not All Quan Channels Are Present = False
	Fold Change Threshold for Up-/Down-Regulation: = 2
	Maximum Allowed Fold Change: = 100
	Use Ratios Above Maximum Allowed Fold Change for Quantification = False
	Percent Co-Isolation Excluding Peptides from Quantification: = 100
Protein Quantification	Use Only Unique Peptides
Experimental Bias	Normalize On Protein Median
