# Supplementary material for: Comparative Proteomic Analysis of Plasma Membrane Proteins in Rice Leaves Reveals a Vesicle Trafficking Network in Plant Immunity That Is Provoked by Blast Fungi
Source: Front Plant Sci. 2022 Apr 25;13:853195. doi: 10.3389/fpls.2022.853195 (PMC9083198; doi:10.3389/fpls.2022.853195)
Supplement: Supplementary file 3 [file Table_3.XLSX]

## Sheet: Sheet1
Supplemental Table S3. All the primers used in this study.
Primer name	Primer sequence (5'-3')
OsSYP71-F	ATGGATGAAATGGACGAGAAGGTG
OsSYP71-R	GACGATATCAATGCAGAAGTTGCG
Sec3-F	TAAAGCCGCTTCATCCCAGGTTC
Sec3-R	GCTTCCACACCCTCTGTAACAAC
OsNPSN13-F	GCTGCAGCTCTATCACAACAAAC
OsNPSN13-R	ACCATTTGGCTAGCCTTCTTCAG
VAMP-F	ACAGCAGATCGACGTACTTGTCAG
VAMP-R	TGAAATCAGCAGCCTGGTCATGG
SCAMP-F	ACTCCAGGCAATGGAAGCTGAAC
SCAMP-R	TCAATGACAATGCCAGCTTGGG
Sec6-F	CAAGGAAGGAAGCCAAAGAGGTTG
Sec6-R	GGGTTCCCGTCTACAAGAGAGTTC
Exo70-F	AAAGCTTGTGCCCGCCAATG
Exo70-R	TGCTGAGCAGCAACTGTACG
OsRem4.1-F	TGATCGTTCACCGCTTCGCTTC
OsRem4.1-R	GTTCCACACAGCAACCACATCAC
Sec1-F	GCAGCAATCAACCCAGACAAGTTC
Sec1-R	TCAGTGGATAATCCTGCCAACTGC
Sec7-F	AGTACGCTTGTGGGATATTTGCAG
Sec7-R	AGAAGACACCGATCTCACCCTTC
Actin-F	AGGAAGGCTGGAAGAGGACC
Actin-R	CGGGAAATTGTGAGGGACAT
pAN580-OsNPSN13-F	CCGGAGCTAGCTCTAGAATGGCGAGCGACGTG
pAN580-OsNPSN13-R	TTGCTCACCATGGATCCGAGGCTTCCGAAAGA
1304-13-F	GACTAGTGTGAGGCAAGAGAGAGAG
1304-13-R	GGTAACCTCCCACTCGCAATGCTCA
JC13-F	CCTATGTCACATTGAGGAAAACG
JC13-R	GAACCGAGTCTAGCTCATTGCC
13-F	GCGATAATTTATCCTAGTTTGCGCG
13-R	TCTTTCTCTGGTCCAGTCTTTCCG
LOC_Os01g04950_F	ATGGGCAGGTTCTGGACCATTG
LOC_Os01g04950_R	CAACGCCAAACCCAGGATGTAG
LOC_Os01g11414_F	AGATGGCTTAATGAGGCCAAGCG
LOC_Os01g11414_R	TCGTGTTCCTGCCTTGTTCTCG
LOC_Os01g13430_F	TGTGCCATCCTGGTGGAACTTTG
LOC_Os01g13430_R	ATTTCCTACGCCAGAGCAAGGC
LOC_Os01g25386_F	CTGCAAACTGGCCACACAAAGG
LOC_Os01g25386_R	TGTTGTGCCTGTACCGAAACTTG
LOC_Os01g37800_F	TGCCCACGGGATCATTGTTG
LOC_Os01g37800_R	TGCTTGACATTGTTGAAGCTCTCC
LOC_Os01g40470_F	ATGACCGTCGGAAGCTGTACTC
LOC_Os01g40470_R	TCTCCATTACACCACGGACCTG
LOC_Os01g47730_F	GTGCTGCTCGTCTTGACTTTGAC
LOC_Os01g47730_R	GGCAATTTGCATAGCTCGACGAC
LOC_Os02g14790_F	ACGGTGTGCATGTGGGATTACC
LOC_Os02g14790_R	TTCAGTGTGGTGGCCATACCTC
LOC_Os02g46962_F	AGCAGGATGCTTTGCAGGATGAC
LOC_Os02g46962_R	TGCTGAGATTGGTAGCATTGTTGC
LOC_Os02g50960_F	TCGTCTTCGCCAAGGAGTACAG
LOC_Os02g50960_R	TGAGCATGCCAAAGATGACAGC
LOC_Os02g57240_F	TGGCCTGGGTTTGACTACATGG
LOC_Os02g57240_R	AGAGATCTGTTGGCCAGGTTCTTG
LOC_Os03g05390_F	TCCGAGGATACACCGTTCTTGAG
LOC_Os03g05390_R	AGGTCAGGTTCAGGCTACGTTC
LOC_Os03g23950_F	TGGCACTCAAACTGTGCTAGATGG
LOC_Os03g23950_R	TTGCAGTGGAGAGACCTGAAGTG
LOC_Os03g50740_F	GCATGTACATTCACCAGGTGTGAG
LOC_Os03g50740_R	ATGCTTGTTGGCTTGCTGTTCC
LOC_Os03g58940_F	CGACTGCCCAAAGATGCTGAAC
LOC_Os03g58940_R	TTGGTGGCGTTGTTGGACTC
LOC_Os04g38340_F	TGCAGTTGGTGGGATGAAGGTG
LOC_Os04g38340_R	TTCTTCCGCACCATAACAAGAGC
LOC_Os05g06700_F	GGTGGACTCTTTACTTGACTGCTG
LOC_Os05g06700_R	TGAACCCAACAATGTTTGCAAGGC
LOC_Os09g09480_F	AGGCTCTTTGGTAAGCCCAAGG
LOC_Os09g09480_R	CTTCTCCAGCATGTCAAGGGTCTC
LOC_Os11g02424_F	TGCGTAAATGCAAGGGATTGGAC
LOC_Os11g02424_R	ACAAACGAACAGCGAATCTTGGG
LOC_Os11g41130_F	AGCTGTACCATGAGAGAGGTCAC
LOC_Os11g41130_R	GCAACCTCTAACTCTCGCACTAAC
