# Supplementary material for: Comparative Proteomic Analysis of Plasma Membrane Proteins in Rice Leaves Reveals a Vesicle Trafficking Network in Plant Immunity That Is Provoked by Blast Fungi
Source: Front Plant Sci. 2022 Apr 25;13:853195. doi: 10.3389/fpls.2022.853195 (PMC9083198; doi:10.3389/fpls.2022.853195)
Supplement: Supplementary file 4 [file Table_4.XLSX]

## Sheet: Sheet1
Supplemental Table S4. Quantification of peptides from iTRAQ analysis.
Sequence	Protein Group Accessions	Modifications	IonScore	114/113	114/113 Count	115/113	115/113 Count	116/113	116/113 Count	117/113	117/113 Count	118/113	118/113 Count	119/113	119/113 Count	Charge	MH+ [Da]	ΔM [ppm]
aAAAAAAAAAAAAR	Q8RZJ2	N-Term(iTRAQ8plex)	49.73	1.10433	1	1.25758	1	1.31165	1	0.918824	1	1.09169	1	1.26011	1	3	1402.81	-0.604069
aAAAAAAAmIGSGHR	A2XBT2	N-Term(iTRAQ8plex); M9(Oxidation)	16.86	0.914946	1	0.84227	1	0.856731	1	0.942317	1	0.907829	1	0.97175	1	2	1645.87	-3.8354
aAAAAAAEEPk	Q5TKJ2	N-Term(iTRAQ8plex); K11(iTRAQ8plex)	59.09	1.05865	11	1.01763	11	1.00141	11	1.10791	11	1.0035	11	1.01183	11	2	1607.91	-4.49726
aAAAAAAPAAGk	B8B082	N-Term(iTRAQ8plex); K12(iTRAQ8plex)	40.76	0.9889	2	1.02746	2	1.13553	2	0.897998	2	0.811968	2	0.990321	2	3	1548.93	-3.6998
aAAAAAAPAGk	Q8W0D1	N-Term(iTRAQ8plex); K11(iTRAQ8plex)	33.71	0.989271	2	0.955103	2	0.826714	2	0.941595	2	0.917583	2	0.976883	2	3	1477.89	-1.22732
aAAAAAPAAAATEPIAAA	Q5Z402	N-Term(iTRAQ8plex)	47.08	1.14068	1	1.21265	1	1.3062	1	1.24594	1	1.00082	1	1.06179	1	2	1783.99	1.77458
aAAAAEPATVPR	Q8LIS8	N-Term(iTRAQ8plex)	25.4	1.14948	2	1.66214	2	1.51558	2	1.31933	2	1.20938	2	1.39248	2	3	1428.81	-3.30947
aAAAAGADPSk	Q5SMQ9	N-Term(iTRAQ8plex); K11(iTRAQ8plex)	30.58	0.907265	1	0.793446	1	0.842199	1	0.88528	1	1.01832	1	0.941542	1	3	1537.87	-9.35445
aAAAAGGGLFPMPDPk	Q6ASU6	N-Term(iTRAQ8plex); K16(iTRAQ8plex)	8.3	0.902554	1	0.874423	1	0.894099	1	1.11189	1	1.1803	1	1.09158	1	3	2079.15	-1.06823
aAAAAGLAALR	B8ANN3	N-Term(iTRAQ8plex)	42.65	1.1801	1	1.1596	1	1.19462	1	1.03673	1	0.994029	1	1.18049	1	3	1259.77	-0.964599
aAAAAGVGVAR	Q10DV1	N-Term(iTRAQ8plex)	22.89	1.0217	1	1.07648	1	1.59004	1	1.03264	1	1.11161	1	1.30051	1	2	1217.72	-3.58176
aAAAAIPcER	Q69Y17	N-Term(iTRAQ8plex); C8(Carbamidomethyl)	27.12	1.57839	1	1.74605	1	2.18789	1	1.19144	1	1.32901	1	1.78258	1	3	1333.72	-2.1587
aAAAASSGQTTAAAATSk	A2YP92	N-Term(iTRAQ8plex); K18(iTRAQ8plex)	116.9	1.06537	1	1.00545	1	0.914731	1	0.974908	1	0.832233	1	0.881008	1	2	2144.18	0.234305
aAAAAVEEEEEAk	Q0IZQ4	N-Term(iTRAQ8plex); K13(iTRAQ8plex)	17.77	0.992438	1	0.997704	1	0.899954	1	0.92126	1	0.888782	1	0.868972	1	3	1926.02	-5.44454
aAAAAYNYEGDAR	B7E741	N-Term(iTRAQ8plex)	54.67	1.07696	3	1.146	3	1.19945	3	1.05206	3	1.10687	3	1.17371	3	2	1646.8	-3.98245
aAAAEALAAALDENLDk	Q6ASU8	N-Term(iTRAQ8plex); K17(iTRAQ8plex)	42.49	0.945025	12	0.841552	12	0.939243	12	1.01493	12	1.08054	12	1.00374	12	3	2265.25	-3.50161
aAAAEFLk	A2WMG6	N-Term(iTRAQ8plex); K8(iTRAQ8plex)	24.03	0.999323	48	0.974058	48	0.938897	46	0.994516	48	0.950577	48	0.895286	48	2	1428.86	-4.43425
aAAAELIk	Q6K4S7	N-Term(iTRAQ8plex); K8(iTRAQ8plex)	32.88	1.22481	4	1.32092	4	1.04131	4	1.35305	4	0.929264	4	0.952143	4	2	1394.88	-3.8601
aAAAGDGGVEMADAEPcLH	B7EHA8	N-Term(iTRAQ8plex); C17(Carbamidomethyl)	106.29	1.38259	2	1.16392	2	1.38385	2	0.786418	2	0.885604	2	1.01235	2	2	2145.99	0.527563
aAAAHGIALVAPDTSPR	Q5JLP6	N-Term(iTRAQ8plex)	53.88	1.11421	15	1.34635	15	1.14458	15	1.00718	15	0.990299	15	0.988301	15	3	1922.07	-0.749251
aAAAIFHR	Q94EF2	N-Term(iTRAQ8plex)	23.71	0.856659	8	0.87452	8	0.815365	8	1.00563	8	0.945213	8	0.902035	8	3	1160.68	-1.88754
aAAASAGcGFcAAGGGDk	Q7XIZ0	N-Term(iTRAQ8plex); C8(Carbamidomethyl); C11(Carbamidomethyl); K18(iTRAQ8plex)	81.98	0.935956	1	0.912805	1	0.777314	1	0.951605	1	1.0382	1	0.86358	1	2	2207.08	-1.8968
aAAASPAGAAR		N-Term(iTRAQ8plex)	11.93													2	1217.69	-0.663967
aAAAVAANADVER	Q9LD96	N-Term(iTRAQ8plex)	17.2	1.28191	1	1.39496	1	1.59079	1	1.07406	1	1.15771	1	1.37632	1	3	1532.83	-1.52099
aAAAVEMADAk	Q8RZQ8	N-Term(iTRAQ8plex); K11(iTRAQ8plex)	59.83	0.811516	9	0.893024	9	0.85965	9	1.27823	9	1.23469	9	1.21668	9	2	1655.92	-4.85998
aAAAVEmADAk	Q8RZQ8	N-Term(iTRAQ8plex); M7(Oxidation); K11(iTRAQ8plex)	27.41	0.88415	1	0.893706	1	0.871455	1	1.09181	1	1.26108	1	1.18647	1	3	1671.91	-7.94968
aAAAVTLR	A2ZXD8	N-Term(iTRAQ8plex)	21.87	1.02594	2	1.0315	2	0.992152	2	1.04951	2	1.02755	2	1.06631	2	2	1076.67	-1.31415
aAADGHNMDVGLk	Q0ILB9	N-Term(iTRAQ8plex); K13(iTRAQ8plex)	10.87	0.992102	1	1.01439	1	0.901553	1	0.954001	1	1.0837	1	0.960969	1	3	1907.01	-7.18913
aAADGRPSVGPAYR	B8A6V4	N-Term(iTRAQ8plex)	11.84	1.00649	3	1.16415	3	1.15794	3	0.98734	3	0.978772	3	0.934009	3	3	1691.91	-3.96894
aAADHck	B8BPN4	N-Term(iTRAQ8plex); C6(Carbamidomethyl); K7(iTRAQ8plex)	3.95	1.04866	1	2.21031	1	0.926174	1	0.91137	1	0.902298	1	0.874822	1	3	1380.75	-2.09816
aAAEAAFHR	Q6ZL37	N-Term(iTRAQ8plex)	10.3	0.985353	2	1.01404	2	0.960639	2	0.979017	2	0.975887	2	0.938914	2	2	1247.67	-4.5937
aAAEDQPAAAATEEk	Q84PB4	N-Term(iTRAQ8plex); K15(iTRAQ8plex)	24.38	0.97969	1	0.962594	1	0.949147	1	0.985614	1	1.05465	1	1.06145	1	3	2081.09	-4.5215
aAAEEAPTSAAGDEVVk	A2Z3W4	N-Term(iTRAQ8plex); K17(iTRAQ8plex)	81.05	1.12093	1	1.12888	1	1.09735	1	0.822784	1	0.926255	1	0.881659	1	3	2224.18	-5.83819
aAAEEEEEEEEEEk	A2XGN6	N-Term(iTRAQ8plex); K14(iTRAQ8plex)	39.64	0.878396	1	0.718768	1	0.821688	1	1.09897	1	1.3845	1	1.14491	1	3	2259.06	-1.59632
aAAEGGGETLMEk	A2WMA1	N-Term(iTRAQ8plex); K13(iTRAQ8plex)	72.02	0.864854	1	0.768239	1	0.760858	1	1.17746	1	1.09539	1	1.10889	1	2	1871.99	-3.60578
aAAEGGGETLmEk	A2WMA1	N-Term(iTRAQ8plex); M11(Oxidation); K13(iTRAQ8plex)	61.52	0.969486	1	1.04433	1	0.881134	1	1.11814	1	1.05846	1	1.04813	1	3	1887.99	-3.70156
aAAELANASk	A2ZS26	N-Term(iTRAQ8plex); K10(iTRAQ8plex)	13.65	0.916058	2	0.916607	2	0.928323	2	1.07891	2	1.1133	2	1.04827	2	2	1553.9	-4.67939
aAAEPLSR	Q7XAN4	N-Term(iTRAQ8plex)	33.49	1.03802	2	1.2106	2	1.37163	2	1.03107	2	1.00861	2	1.24577	2	3	1118.65	-1.57505
aAAFVADMMR	A3BP16	N-Term(iTRAQ8plex)	10.62	0.913591	27	0.827338	27	0.869057	27	0.978813	27	0.981034	27	0.985155	27	2	1386.71	-2.2111
aAAFYAGVPENVPVR	Q84P96	N-Term(iTRAQ8plex)	43.71	0.675039	2	0.679328	2	0.844037	2	0.857813	2	0.910894	2	0.877258	2	3	1865.02	0.213365
aAAGIPEELDGDVVTVPk	Q6ZFM7	N-Term(iTRAQ8plex); K18(iTRAQ8plex)	84.99	1.15231	17	1.05002	17	1.08659	17	0.755098	17	0.799288	17	0.800279	17	2	2389.34	-1.02089
aAAGNVLSDSDMNTk	Q01JZ7	N-Term(iTRAQ8plex); K15(iTRAQ8plex)	41.17	1.12369	2	1.31552	2	1.1068	2	1.15852	2	1.02669	2	1.02168	2	3	2102.09	-4.49434
aAAGSDEDHSNSPTR	Q6K2P9	N-Term(iTRAQ8plex)	11.94	1.54193	1	1.42217	1	1.43384	1	1.29591	1	0.874205	1	1.16707	1	3	1818.85	-0.238968
aAAGVAAVDGVEAVLR	B8BH17	N-Term(iTRAQ8plex)	31.51	0.996782	7	0.992732	7	1.0938	7	1.16928	7	1.16553	7	1.25422	7	3	1773.02	-0.364117
aAAGVcEESIPGLR	Q941Z0	N-Term(iTRAQ8plex); C6(Carbamidomethyl)	43.67	1.23244	3	1.28109	3	1.35614	3	1.01674	3	1.06695	3	1.13189	3	2	1733.92	-0.150156
aAAHcVNVVPER	Q69IM8	N-Term(iTRAQ8plex); C5(Carbamidomethyl)	0.73	0.645109	1	0.8067	1	0.68731	1	0.528506	1	0.345953	1	0.484411	1	3	1626.87	0.789863
aAAHLk	Q7FAH2;Q6K5G8;Q0J8A4	N-Term(iTRAQ8plex); K6(iTRAQ8plex)	22.22													3	1218.78	-1.48153
aAALNIVPTSTGAAk	Q9SNK3;Q7X8A1	N-Term(iTRAQ8plex); K15(iTRAQ8plex)	60.23													2	1993.19	-1.17274
aAALPAAcGGDSSALSk	A2YNW1	N-Term(iTRAQ8plex); C8(Carbamidomethyl); K17(iTRAQ8plex)	71.81	1.25684	16	1.48072	16	1.11451	16	1.27678	16	0.904073	16	0.886236	16	2	2155.16	-1.43988
aAANTYcELLSSQSDNNVk	A2WNI6	N-Term(iTRAQ8plex); C7(Carbamidomethyl); K19(iTRAQ8plex)	39.11	0.843088	1	0.731909	1	0.819869	1	1.02452	1	1.05499	1	0.977663	1	3	2693.36	-2.1273
aAANTYcQLLSSQSDNNVk	B8BJD1	N-Term(iTRAQ8plex); C7(Carbamidomethyl); K19(iTRAQ8plex)	39.59	0.948071	2	0.85117	2	0.805388	2	0.970513	2	0.880304	2	0.917151	2	3	2692.38	0.732457
aAAPPPPFYVR	Q8GSE8	N-Term(iTRAQ8plex)	31.93	1.20402	1	1.41315	1	1.53915	1	0.890893	1	0.995431	1	1.15034	1	3	1489.84	-2.18762
aAAPPPRPPPVk	Q7X7K8	N-Term(iTRAQ8plex); K12(iTRAQ8plex)	3.16	1.03707	2	1.28532	2	0.988523	2	1.03582	2	0.934656	2	0.944487	2	3	1806.12	-2.15417
aAAPQPAPNASAAADDHR	A2Z736	N-Term(iTRAQ8plex)	63.94	1.14493	4	1.37257	4	1.16315	4	1.06763	4	1.08619	4	1.05783	4	3	2035.02	-4.51275
aAAQAALEEMDAD	Q6F321	N-Term(iTRAQ8plex)	33.15	1.10485	1	1.16607	1	1.17719	1	1.10871	1	1.25799	1	1.18596	1	2	1609.76	-7.31542
aAASAADDEVVVR	Q0JA85	N-Term(iTRAQ8plex)	31.65	0.832554	1	0.824256	1	0.899823	1	1.07331	1	1.12089	1	1.12506	1	2	1577.84	-3.03993
aAASEADEEER	Q5N8I8	N-Term(iTRAQ8plex)	50.47	0.844765	1	0.717999	1	0.778935	1	0.980332	1	1.09746	1	0.995295	1	2	1481.7	-3.86217
aAASLYVk	Q7X6D9	N-Term(iTRAQ8plex); K8(iTRAQ8plex)	36.61	0.988769	1	0.880126	1	0.949499	1	1.01133	1	1.07581	1	0.962271	1	2	1430.88	-1.27497
aAASNLGk	Q6K4K9	N-Term(iTRAQ8plex); K8(iTRAQ8plex)	12.07	0.971569	1	0.9803	1	0.997876	1	0.986748	1	1.1031	1	0.952392	1	2	1339.81	-7.31577
aAASTTADR	A2ZHF1	N-Term(iTRAQ8plex)	30.43	1.37112	2	1.47447	2	1.27049	2	1.2048	2	0.921315	2	0.926936	2	2	1167.62	-2.4204
aAATDDAAWGk	Q6Z3Y9	N-Term(iTRAQ8plex); K11(iTRAQ8plex)	49.65	0.958134	5	0.930856	5	0.895131	5	1.14839	5	1.04158	5	1.00525	5	2	1684.9	-5.04456
aAATGGSHER	Q337E7	N-Term(iTRAQ8plex)	48.57	1.32308	1	1.99832	1	1.01512	1	1.10004	1	0.787701	1	0.93312	1	3	1260.66	-2.14385
aAAVAGAk	Q6ES44	N-Term(iTRAQ8plex); K8(iTRAQ8plex)	23.93	0.935489	1	1.05963	1	0.771807	1	0.89398	1	0.998027	1	0.88972	1	2	1266.79	-5.89663
aAAVEAGGAATAPAPAAEk	Q6YUA7	N-Term(iTRAQ8plex); K19(iTRAQ8plex)	40.55	0.993054	1	1.13929	1	1.09959	1	1.04075	1	0.979617	1	1.07576	1	3	2232.24	-3.24047
aAAVGANSQAAQSMLk	A2Y9X7	N-Term(iTRAQ8plex); K16(iTRAQ8plex)	64.33	1.0399	2	0.953929	2	0.990918	2	0.913034	2	1.00289	2	1.04653	2	2	2126.19	1.60791
aAcEGSLR	A2XRZ0;A2XRZ6	N-Term(iTRAQ8plex); C3(Carbamidomethyl)	17.87													2	1167.61	-1.32717
aAcYDcGTSVWR	Q8S3P3	N-Term(iTRAQ8plex); C3(Carbamidomethyl); C6(Carbamidomethyl)	20.7	0.567586	1	0.522104	1	0.501942	1	1.33646	1	1.38337	1	1.34849	1	2	1749.8	-0.453725
aADAAAAADAk	Q852G4	N-Term(iTRAQ8plex); K11(iTRAQ8plex)	56.39	1.25993	4	1.39477	4	1.42183	4	1.09343	4	0.655899	4	0.699339	4	2	1553.87	-3.50558
aADAAADGGAVELR	B9G4P8	N-Term(iTRAQ8plex)	69.78	1.0892	3	1.04644	3	1.17468	3	0.802105	3	0.909411	3	0.931917	3	2	1590.83	-2.64446
aADASFPR	A3BP16	N-Term(iTRAQ8plex)	24.53	1.07092	1	1.204	1	1.3417	1	1.06637	1	1.06178	1	1.18271	1	3	1138.62	-0.538628
aADcIIPTFk	Q01N35	N-Term(iTRAQ8plex); C4(Carbamidomethyl); K10(iTRAQ8plex)	31.11	0.970193	2	0.917748	2	0.892564	2	0.981811	2	0.989488	2	0.986157	2	2	1743.98	-6.38569
aADEIQDEDPTVAR	B9FAH6	N-Term(iTRAQ8plex)	53.12	0.949536	2	1.04949	2	1.17647	2	0.909721	2	1.24934	2	1.13742	2	2	1833.91	-0.796405
aADLLNDESPLLTQck	B9F4P8	N-Term(iTRAQ8plex); C15(Carbamidomethyl); K16(iTRAQ8plex)	58.51	1.07062	2	0.95571	2	0.952884	2	1.12336	2	1.22622	2	1.2417	2	3	2396.29	-3.9714
aADLTYWESAAR	Q2QS13	N-Term(iTRAQ8plex)	8.29	1.09962	3	0.982044	3	1.01555	3	0.977069	3	0.986846	3	1.02482	3	3	1657.85	0.562936
aADPLSSWSAAAR	B8ARB3	N-Term(iTRAQ8plex)	8.42	1.04911	1	1.00176	1	0.983166	1	0.97422	1	0.994555	1	1.04397	1	2	1606.86	3.82792
aADSDITEESIk	A2X8K8	N-Term(iTRAQ8plex); K12(iTRAQ8plex)	28.66	1.1128	1	1.1118	1	1.21011	1	0.731275	1	0.736952	1	0.674544	1	2	1887	-7.23472
aADTIIGDEAHR	A2XZS5	N-Term(iTRAQ8plex)	19.97	1.33108	2	1.82628	2	1.42712	2	1.16888	2	0.79812	2	0.926594	2	3	1572.83	-1.65468
aADVGADLVGk	O80384;Q8H616;Q6H883	N-Term(iTRAQ8plex); K11(iTRAQ8plex)	64.76													2	1623.95	-2.52925
aADVLLWk	A2X381	N-Term(iTRAQ8plex); K8(iTRAQ8plex)	21.87	1.00566	3	0.962948	3	0.99617	3	0.975154	3	1.0944	3	0.948009	3	2	1523.93	-5.20792
aAEAAALVAATR	B9G4P8	N-Term(iTRAQ8plex)	57.19	0.956414	3	1.0514	3	1.01865	3	1.0037	3	1.01273	3	1.05597	3	3	1418.83	-0.575705
aAEAEkEEk	Q10HT7;Q9LWS2	N-Term(iTRAQ8plex); K6(iTRAQ8plex); K9(iTRAQ8plex)	5													3	1917.1	-4.86919
aAEAGAGk	Q84MQ4	N-Term(iTRAQ8plex); K8(iTRAQ8plex)	13.38	0.865784	1	0.791696	1	1.59958	1	1.84538	1	1.46241	1	1.74685	1	2	1282.75	-5.8497
aAEALHQEEk	Q658I5	N-Term(iTRAQ8plex); K10(iTRAQ8plex)	63.3	0.908428	11	0.992682	11	0.900122	11	1.0826	11	1.03509	11	1.05318	11	2	1733.96	0.0875263
aAEAPAAEEPk	Q5TKJ2	N-Term(iTRAQ8plex); K11(iTRAQ8plex)	66.29	1.01295	10	0.981051	10	1.07959	10	1.12377	10	0.994442	10	0.986752	10	3	1691.93	-4.75783
aAEEANVYDDLVk	A3CE45	N-Term(iTRAQ8plex); K13(iTRAQ8plex)	79.87	0.896702	14	0.760452	14	0.812852	14	0.977623	14	1.06641	14	0.978699	14	2	2045.1	-0.730686
aAEEQAASYQAk	B9FCH2	N-Term(iTRAQ8plex); K12(iTRAQ8plex)	22.77	0.899662	1	0.866117	1	0.79224	1	1.01503	1	0.935249	1	0.877138	1	3	1875	-5.22554
aAEESSGAENk	O82143	N-Term(iTRAQ8plex); K11(iTRAQ8plex)	34.86	1.03034	1	0.966353	1	0.957595	1	1.03458	1	0.956264	1	0.94596	1	3	1700.88	-4.48782
aAEETEPAR	A2XLH5	N-Term(iTRAQ8plex)	22.9	0.847028	2	0.74512	2	0.763846	2	0.892302	2	0.928957	2	0.8824	2	2	1277.66	-1.96198
aAEETWGANR	A2WXW7	N-Term(iTRAQ8plex)	14.68	1.09512	2	1.04884	2	1.03742	2	0.980931	2	0.977419	2	1.01977	2	2	1408.71	-0.920133
aAEGGGEEDEQR	Q0DNR8	N-Term(iTRAQ8plex)	29.7	1.01364	1	1.03349	1	0.451826	1	0.503152	1	0.866888	1	0.999151	1	2	1551.72	-1.32552
aAEGLAGSHLDEVk	Q2QPR0	N-Term(iTRAQ8plex); K14(iTRAQ8plex)	58.42	1.13745	9	1.25858	9	1.17552	9	0.966977	9	0.920184	9	0.966873	9	3	2005.11	-3.02127
aAEGVTIIDDR	A6N1E5	N-Term(iTRAQ8plex)	10.6	1.02593	2	1.02216	2	1.04355	2	0.998891	2	1.04548	2	1.16057	2	2	1463.81	4.04215
aAELANAANFIDk	B9EYZ4;A2WU37	N-Term(iTRAQ8plex); K13(iTRAQ8plex)	55.14													3	1956.09	-4.23994
aAEMYTR	B9F767	N-Term(iTRAQ8plex)	13.36	1.03065	1	0.950451	1	0.967126	1	0.966187	1	0.862779	1	0.943164	1	2	1145.59	-1.9917
aAENAGPTYR	Q5VM91	N-Term(iTRAQ8plex)	36.67	0.888204	2	1.06471	2	1.10842	2	0.803871	2	0.827281	2	1.08876	2	3	1353.7	-2.07126
aAEQAGk		N-Term(iTRAQ8plex); K7(iTRAQ8plex)	13.38													2	1282.75	-5.8419
aAESPADFTVk	Q9FW37	N-Term(iTRAQ8plex); K11(iTRAQ8plex)	37.17	0.932586	2	0.881302	2	0.890992	2	0.985985	2	1.01376	2	0.949909	2	2	1743.96	-5.22608
aAEYMEMPVR	A2XRR9	N-Term(iTRAQ8plex)	7.96	0.906093	1	0.915004	1	1.0297	1	0.899942	1	0.832033	1	1.0378	1	2	1500.74	-5.66457
aAFDEAEk	B9FWE4	N-Term(iTRAQ8plex); K8(iTRAQ8plex)	38.66	1.27777	2	1.45797	2	1.13082	2	1.44544	2	0.896177	2	0.949314	2	2	1488.81	-6.30265
aAFDVYDVDGDGR	Q5ZCK5	N-Term(iTRAQ8plex)	45.82	1.05635	4	0.985874	4	0.989415	4	0.929381	4	0.985487	4	1.00031	4	2	1703.81	-3.13045
aAFLAAGGGDGGLR	Q2QNK2	N-Term(iTRAQ8plex)	22.72	1.06096	1	1.16036	1	1.19785	1	0.975599	1	0.958107	1	1.0471	1	3	1536.84	-1.62779
aAFPVSSAR	Q9LGA3	N-Term(iTRAQ8plex)	15.73	1.0178	1	1.08214	1	1.10205	1	1.03535	1	1.14095	1	1.21449	1	3	1209.69	-1.65353
aAFYSDAEENPNR	B9FVQ2	N-Term(iTRAQ8plex)	34.14	1.11059	1	1.02267	1	0.941303	1	0.962934	1	0.867445	1	0.993373	1	2	1787.84	-5.37382
aAGADGAVVPVADR	B8B402	N-Term(iTRAQ8plex)	38.74	1.22115	2	1.38236	2	1.3967	2	1.15622	2	1.23445	2	1.33369	2	2	1572.86	-0.774581
aAGAEAIPGGVR	Q94HA2	N-Term(iTRAQ8plex)	32.1	1.01904	2	1.23825	2	1.27793	2	0.887712	2	0.877861	2	0.998183	2	2	1372.78	-2.12649
aAGALSSASQPAFAHNAR	Q2R3B9	N-Term(iTRAQ8plex)	19.88	1.22758	1	1.67459	1	1.31883	1	1.11444	1	0.811896	1	0.878691	1	3	2031.06	-4.34967
aAGDLLEHMESIR	A2YLE3	N-Term(iTRAQ8plex)	12.73	0.871315	1	0.892951	1	1.00184	1	0.927078	1	0.940004	1	0.908204	1	3	1745.91	-3.82522
aAGFTGFk	Q6ZD89	N-Term(iTRAQ8plex); K8(iTRAQ8plex)	36.63	1.03634	1	0.969622	1	0.933496	1	0.862407	1	0.831517	1	0.779428	1	3	1406.82	-2.36579
aAGFVWLR	A2YDT7	N-Term(iTRAQ8plex)	40.87	0.917371	8	0.891912	8	0.896879	8	0.903994	8	0.944669	8	0.876595	8	3	1223.72	-4.09996
aAGGASGGEELTVEER	Q2R2W2	N-Term(iTRAQ8plex)	61.32	1.04795	51	0.939461	51	1.00085	51	0.919583	51	0.991713	51	0.993155	51	3	1836.92	-0.129558
aAGGAVLLTA	Q84MQ4	N-Term(iTRAQ8plex)	44.8	0.688577	1	0.631791	1	0.732548	1	0.688556	1	0.730093	1	0.799904	1	2	1147.7	0.246562
aAGGAVVLTA	A3BM51	N-Term(iTRAQ8plex)	15.02	1.01695	1	1.16207	1	1.5704	1	1.2443	1	1.10525	1	1.37105	1	2	1133.68	-1.12813
aAGGEIAR	A3BKR4	N-Term(iTRAQ8plex)	30.21	0.778303	1	0.984074	1	1.38554	1	1.01219	1	1.68853	1	1.95655	1	3	1048.61	0.143588
aAGGFGGITVNNR	Q9LX04	N-Term(iTRAQ8plex)	43.5	0.958395	2	0.936181	2	0.936558	2	1.02876	2	1.06132	2	1.04068	2	2	1537.84	0.412161
aAGGGAGAAAGGGR	Q0IV73	N-Term(iTRAQ8plex)	48.02	0.810032	2	1.06056	2	1.84825	2	1.05521	2	1.02605	2	1.22737	2	3	1304.7	-1.14691
aAGGGAGGAAGGGR	A2ZHB1	N-Term(iTRAQ8plex)	54.65	1.00168	1	1.06997	1	1.25342	1	0.573128	1	0.734403	1	1.28969	1	3	1290.68	-1.63653
aAGGHQLAk	Q2QLY9	N-Term(iTRAQ8plex); K9(iTRAQ8plex)	24.69	1.26011	1	1.39208	1	1.23116	1	0.763664	1	0.728651	1	0.782263	1	3	1460.88	-2.62743
aAGGYGGVVVNNR	B8BHS9	N-Term(iTRAQ8plex)	43.73	0.547153	1	0.568641	1	0.520824	1	1.33024	1	1.36103	1	1.25914	1	2	1537.83	-3.23273
aAGHLk	B9FR61	N-Term(iTRAQ8plex); K6(iTRAQ8plex)	3.62	1.07109	3	1.22141	3	0.985527	3	1.15058	3	1.01614	3	1.05709	3	3	1204.76	-1.63
aAGLDLAAATR	Q0DM67	N-Term(iTRAQ8plex)	14.58	1.05243	1	1.05505	1	1.30274	1	1.097	1	1.04291	1	1.2272	1	2	1333.77	-1.97135
aAGVLENHEEGR	Q654W0	N-Term(iTRAQ8plex)	33.04	0.88159	1	0.842139	1	0.779104	1	0.907768	1	0.945403	1	0.927617	1	3	1585.83	1.31568
aAGVYTDAEGAAADk	A2XNF0	N-Term(iTRAQ8plex); K15(iTRAQ8plex)	50.34	1.03985	1	0.940596	1	1.01268	1	0.891373	1	0.980262	1	0.92544	1	4	2018.06	-1.34419
aAHFEESMk	Q7XE16;Q10RP0	N-Term(iTRAQ8plex); K9(iTRAQ8plex)	17.99													3	1657.88	-3.30411
aAHFEESmk	Q7XE16;Q10RP0	N-Term(iTRAQ8plex); M8(Oxidation); K9(iTRAQ8plex)	17.98													3	1673.87	-5.08432
aAHLALk	Q20IJ5	N-Term(iTRAQ8plex); K7(iTRAQ8plex)	6.25	1.05893	1	1.26304	1	1.06284	1	0.929016	1	0.879064	1	0.955199	1	3	1331.86	-1.19089
aAHLVDSTNQVGHFQk	Q8L6I2;Q8L6I1;Q8L6I3	N-Term(iTRAQ8plex); K16(iTRAQ8plex)	5.91													4	2360.29	-1.46073
aAIAAHPLYER	B8B0R0	N-Term(iTRAQ8plex)	14.48	1.47143	1	2.06297	1	1.75159	1	1.45354	1	0.894605	1	1.15486	1	3	1515.85	-3.615
aAIAAIQNcEDLPR	B9FR59	N-Term(iTRAQ8plex); C9(Carbamidomethyl)	35.94	1.04254	2	0.920458	2	1.10908	2	1.03595	2	1.21945	2	1.25653	2	2	1845.98	-1.36458
aAIAHLPPSATAAAPDQPk	Q84M69	N-Term(iTRAQ8plex); K19(iTRAQ8plex)	17.66	1.01776	1	1.17016	1	1.08132	1	0.930798	1	0.955367	1	0.931764	1	3	2435.38	-3.15303
aAIcGVQDSQGk	Q8S6N5	N-Term(iTRAQ8plex); C4(Carbamidomethyl); K12(iTRAQ8plex)	47.86	0.971652	1	0.981632	1	0.932493	1	0.938299	1	0.988586	1	0.788446	1	2	1841.99	-3.6165
aAIDQHEGGLDAFSR	Q0JDF0	N-Term(iTRAQ8plex)	15.69	1.11108	1	1.24075	1	1.13738	1	1.06451	1	0.945078	1	0.980394	1	3	1890.96	-2.1872
aAIkEESEGk	Q7FAH2	N-Term(iTRAQ8plex); K4(iTRAQ8plex); K10(iTRAQ8plex)	15.65	0.946979	4	0.962288	4	0.89296	4	1.04978	4	0.956539	4	0.969634	4	4	1974.16	-2.28707
aAIPTIQYLIk	A2Y650	N-Term(iTRAQ8plex); K11(iTRAQ8plex)	28.65	1.03546	9	0.780088	9	0.807458	9	0.838553	9	0.855721	9	0.826692	9	3	1839.15	-1.92214
aAISEGDQDYR	Q5WAB3	N-Term(iTRAQ8plex)	39.01	0.859089	1	0.983067	1	1.03914	1	1.00613	1	1.11673	1	0.837406	1	2	1528.75	-2.61352
aAIVSGPDDVR	Q6AVV6	N-Term(iTRAQ8plex)	48.38	0.968071	9	1.0215	9	1.10933	9	1.14128	9	1.13548	9	1.20883	9	2	1403.78	-3.08108
aALAATPAR	Q9LD96	N-Term(iTRAQ8plex)	10.28	0.999923	1	1.16731	1	1.07775	1	0.996615	1	1.05585	1	1.1022	1	2	1145.69	-2.50101
aALDHIAR	A2YLE2	N-Term(iTRAQ8plex)	28.2	1.20862	1	1.43676	1	1.32661	1	0.97386	1	0.829546	1	1.10612	1	3	1170.69	0.903055
aALEAEEAS	B8BCN1	N-Term(iTRAQ8plex)	56.11	1.55592	2	1.65827	2	1.80235	2	1.18316	2	1.01489	2	1.33517	2	2	1194.61	-2.6008
aALEVILHR	B9F767	N-Term(iTRAQ8plex)	13.22	0.898688	8	0.917137	8	0.875014	8	0.991578	8	0.943251	8	0.945922	8	3	1325.82	-1.3033
aALFYDNSLSGEDIYDPFLR	Q84ZC0	N-Term(iTRAQ8plex)	69.61	1.11194	11	1.1051	11	1.19369	11	0.919583	11	1.03744	11	1.14842	11	3	2610.29	-3.9239
aALGSTLLLLQDA	Q7XPL0	N-Term(iTRAQ8plex)	13.8	0.758907	3	0.818175	3	0.913709	3	0.818982	3	2.33606	3	0.866767	3	2	1589.94	-1.71763
aALLLSk	Q6Z2X6	N-Term(iTRAQ8plex); K7(iTRAQ8plex)	15.84	0.968328	1	1.00246	1	0.903856	1	0.936478	1	0.987086	1	0.957743	1	2	1323.88	-3.87698
aALLTPAEVADk	Q6ZD89	N-Term(iTRAQ8plex); K12(iTRAQ8plex)	48.69	1.05932	7	0.864116	7	0.901035	7	0.923822	7	0.926902	7	0.927537	7	3	1807.07	-1.98441
aALNLAYQNLSR	A3C0D8	N-Term(iTRAQ8plex)	25.42	1.09887	1	1.05805	1	1.12163	1	0.986101	1	0.910515	1	1.0541	1	3	1637.93	4.11498
aALPNAQDILQLMR	B9FAW0	N-Term(iTRAQ8plex)	42.65	1.16464	4	1.13999	4	0.994529	4	1.20534	4	1.12314	4	1.25012	4	3	1858.05	0.694643
aALQAFGVAPEQGLLLAk	Q0D9K5	N-Term(iTRAQ8plex); K18(iTRAQ8plex)	75.12	0.82286	33	0.796808	33	0.812281	33	1.33404	33	1.40728	33	1.34013	33	2	2405.44	0.638255
aALQAGVEk	Q2QU06	N-Term(iTRAQ8plex); K9(iTRAQ8plex)	31.96	0.930919	1	0.82683	1	0.78544	1	1.0325	1	1.04844	1	0.978976	1	3	1494.9	-4.05811
aALQNLEQFQEk	Q6H547	N-Term(iTRAQ8plex); K12(iTRAQ8plex)	45.78	1.00342	2	0.837881	2	0.913972	2	0.943493	2	0.987384	2	0.96265	2	3	2027.14	-0.413414
aALQSSGQNcAGAER	Q8H5F0	N-Term(iTRAQ8plex); C10(Carbamidomethyl)	27.4	1.06088	1	1.17417	1	1.16064	1	1.00271	1	0.799071	1	1.15319	1	3	1823.89	-1.88791
aALSHVPEER	Q7XTA4	N-Term(iTRAQ8plex)	54.19	1.04097	3	1.09212	3	1.01638	3	0.973008	3	0.936893	3	1.04076	3	3	1412.78	-0.251713
aALWcLTSPEk	A2Y449	N-Term(iTRAQ8plex); C5(Carbamidomethyl); K11(iTRAQ8plex)	48.26	0.911421	3	0.828163	3	0.855217	3	1.08102	3	1.05656	3	1.01855	3	2	1884.05	-2.5345
aALYcSDASIAR	A2X9P2	N-Term(iTRAQ8plex); C5(Carbamidomethyl)	16.46	0.988201	1	1.14485	1	1.1317	1	0.997828	1	1.05147	1	1.01836	1	2	1601.83	0.0312351
aAMADEALR	B8B0N6;A1XFD9	N-Term(iTRAQ8plex)	5.47													2	1251.66	-7.41491
aAMDAIGVAR	Q7XI46	N-Term(iTRAQ8plex)	19.23	1.03176	3	1.01933	3	1.0748	3	1.07705	3	1.06771	3	1.07383	3	2	1278.71	-4.24136
aAmGEANLPQHDVPR	A3A130	N-Term(iTRAQ8plex); M3(Oxidation)	14.82	1.36412	1	1.72837	1	1.54164	1	1.38994	1	0.798707	1	1.1363	1	3	1925.97	-3.23366
aAMGHPEPFPVk	H2KX75;B8BIW4	N-Term(iTRAQ8plex); K12(iTRAQ8plex)	26.23													3	1889.05	-5.41256
aAmGHPEPFPVk	H2KX75;B8BIW4	N-Term(iTRAQ8plex); M3(Oxidation); K12(iTRAQ8plex)	16.8													3	1905.05	-1.4804
aAMWDGGAAATNSHLPR	A2YWY6	N-Term(iTRAQ8plex)	27.09	1.31758	5	1.52655	5	1.27757	5	1.10219	5	0.936078	5	1.04761	5	3	2030.01	-3.62906
aAmWDGGAAATNSHLPR	A2YWY6	N-Term(iTRAQ8plex); M3(Oxidation)	20.97	1.3663	1	1.57577	1	1.37501	1	1.17482	1	0.930004	1	1.13135	1	3	2046.01	-2.84558
aANADGQk	Q651T8	N-Term(iTRAQ8plex); K8(iTRAQ8plex)	39.22	1.01302	2	1.03274	2	0.909152	2	1.09603	2	1.04423	2	0.966798	2	3	1382.78	-3.57321
aANAHEFVSSLPQGYDTVVGEk	B9EYZ4	N-Term(iTRAQ8plex); K22(iTRAQ8plex)	34.19	1.0917	2	1.08583	2	1.0232	2	0.958926	2	0.945928	2	1.06631	2	4	2927.53	-1.90095
aANVLEPDLR	B9FDU6	N-Term(iTRAQ8plex)	16.71	0.930473	1	0.985854	1	1.01817	1	1.03923	1	0.985741	1	1.06232	1	2	1401.8	-1.67647
aANVLLGGIYTk	A2XS80	N-Term(iTRAQ8plex); K12(iTRAQ8plex)	12.14	0.920771	1	0.866929	1	0.92398	1	1.02044	1	1.02408	1	1.06211	1	3	1828.12	0.198805
aAPAAAAHSAVTR	A2XPT6	N-Term(iTRAQ8plex)	41.74	0.916266	1	1.03948	1	0.987128	1	1.04478	1	1.04971	1	1.07827	1	3	1497.84	-2.18276
aAPADESPPEETSAAPTk	A2WNF5	N-Term(iTRAQ8plex); K18(iTRAQ8plex)	37.34	0.858362	1	0.836042	1	0.904124	1	0.939538	1	0.973822	1	0.950926	1	3	2377.22	-5.81651
aAPALVTELEk	A2X694	N-Term(iTRAQ8plex); K11(iTRAQ8plex)	32	0.831922	2	0.78546	2	0.785127	2	0.978848	2	1.05373	2	1.00264	2	3	1750.05	-2.44092
aAPAVITSVR	B8AKN2	N-Term(iTRAQ8plex)	26.95	1.19867	2	1.48253	2	1.82438	2	1.05935	2	1.09583	2	1.43176	2	3	1288.79	1.72458
aAPDEPPSGAR	Q5JJJ9	N-Term(iTRAQ8plex)	32.93	0.796999	1	1.29026	1	1.20744	1	1.08726	1	0.82431	1	1.13783	1	3	1371.71	-3.75744
aAPLHVGR	Q6AV57	N-Term(iTRAQ8plex)	18.81	1.01362	1	1.5293	1	1.24958	1	1.23532	1	1.06254	1	1.23924	1	3	1124.68	-2.43637
aAPVIIVPGk	B9F209	N-Term(iTRAQ8plex); K10(iTRAQ8plex)	29.75	1.05662	1	0.964253	1	0.899003	1	0.803807	1	0.883153	1	0.7899	1	3	1573.04	3.60656
aAPVQVSAk	A3AQL3	N-Term(iTRAQ8plex); K9(iTRAQ8plex)	5.9	1.1312	1	1.26279	1	1.08408	1	1.05903	1	1.08663	1	1.15846	1	3	1478.91	-3.28611
aAQANHDGETPLYVAAER	A2YXN4	N-Term(iTRAQ8plex)	15.86	1.17755	1	1.61242	1	1.34467	1	1.37181	1	0.895595	1	0.914098	1	3	2217.12	-2.04118
aAQDALLLR	Q53P96	N-Term(iTRAQ8plex)	24.5	0.962937	5	1.04301	5	1.23048	5	0.965311	5	0.991811	5	1.17384	5	2	1274.77	-1.19481
aAQDIALADLAPTHPIR	Q6ZKC0;Q2R2W2	N-Term(iTRAQ8plex)	97.03													3	2077.17	1.29251
aAQDIALAELPPTHPIR	Q7XTE8;Q6EUP4	N-Term(iTRAQ8plex)	108.42													3	2117.2	-0.312267
aAQFILER	B8B0A9	N-Term(iTRAQ8plex)	15.54	0.896733	1	0.880987	1	0.891282	1	1.03504	1	1.10662	1	1.16469	1	2	1251.74	-1.01327
aAQLDIVVTNk	Q0J0Q8;B7E905	N-Term(iTRAQ8plex); K11(iTRAQ8plex)	15.21													3	1780.08	-1.57709
aAQPIGATLIGR	P93844	N-Term(iTRAQ8plex)	20.11	0.9534	2	1.27463	2	1.30575	2	1.0746	2	1.142	2	1.18967	2	2	1471.89	-2.18564
aAQVYIk	Q6YS11	N-Term(iTRAQ8plex); K7(iTRAQ8plex)	24.54	0.982077	1	0.901556	1	0.933277	1	0.938894	1	1.00706	1	0.868702	1	2	1400.87	-3.60368
aAQYFNIk	B1NY92	N-Term(iTRAQ8plex); K8(iTRAQ8plex)	28.35	0.869274	2	0.896879	2	0.81411	2	1.0645	2	1.1245	2	0.986534	2	2	1562.91	-1.09643
aASAAVcEDEQHGTR	B8BA50	N-Term(iTRAQ8plex); C7(Carbamidomethyl)	9.52	1.75948	1	2.06294	1	1.59437	1	1.49122	1	1.0726	1	0.999974	1	3	1905.9	-2.40824
aASDAADAEVESSR	Q8H5M0	N-Term(iTRAQ8plex)	57.68	1.12743	3	1.13384	3	1.08921	3	0.937775	3	0.931966	3	0.976537	3	2	1682.81	-1.81773
aASEQAALEAk	B8AMT5	N-Term(iTRAQ8plex); K11(iTRAQ8plex)	56.16	1.07242	2	1.07822	2	0.91679	2	0.927301	2	1.05652	2	0.959009	2	2	1696.96	-5.30523
aASFIEGIQk	Q6Z2X6	N-Term(iTRAQ8plex); K10(iTRAQ8plex)	24.64	0.984111	3	0.861439	3	0.840297	3	0.94001	3	0.962736	3	0.926694	3	2	1671.99	-0.335158
aASFNIIPSSTGAAk	Q7FAH2;Q6K5G8;Q0J8A4	N-Term(iTRAQ8plex); K15(iTRAQ8plex)	71.09													2	2043.17	0.642465
aASIEYPVR	B9FHR3	N-Term(iTRAQ8plex)	9.73	1.10544	1	1.55961	1	1.62494	1	1.09667	1	1.05698	1	1.48493	1	3	1309.74	2.09138
aASLSSLDLAGNR	B9GCI0	N-Term(iTRAQ8plex)	55.48	0.996168	2	0.975341	2	1.08004	2	1.04221	2	1.02352	2	1.0712	2	3	1578.87	-2.50765
aASLVELR	A2ZR53	N-Term(iTRAQ8plex)	6.75	1.17146	1	1.02191	1	1.17477	1	1.01926	1	0.890737	1	1.13598	1	2	1162.71	-1.45857
aASQQGHDDDEENLR	B8BLE1	N-Term(iTRAQ8plex)	49.72	1.08971	2	1.2691	2	1.11852	2	1.23531	2	0.979887	2	1.00103	2	3	1988.92	-2.7335
aASYANDISEAESPR	Q654U5	N-Term(iTRAQ8plex)	54.84	1.01655	1	0.778986	1	0.876667	1	1.0218	1	1.09058	1	1.06566	1	2	1884.92	-2.85558
aASYDAIk	Q0J8A4	N-Term(iTRAQ8plex); K8(iTRAQ8plex)	28.31	1.05934	9	0.969414	9	0.985002	9	0.967104	9	0.879079	9	0.914033	9	2	1446.83	-6.51533
aATAAANSLNR	Q69WS1	N-Term(iTRAQ8plex)	40.26	0.988972	8	1.09954	8	1.13233	8	1.02949	8	0.986856	8	1.04115	8	2	1363.76	-3.03765
aATALELLR	Q94D81	N-Term(iTRAQ8plex)	20.83	0.97206	10	0.913714	10	0.955764	10	0.945008	10	0.992487	10	0.935303	10	2	1261.78	-2.16606
aATcNFSDSNk	B9FXT7	N-Term(iTRAQ8plex); C4(Carbamidomethyl); K11(iTRAQ8plex)	15.03	0.894579	1	0.855596	1	0.865142	1	0.91238	1	1.01135	1	0.894259	1	3	1822.91	-4.0708
aATDkLDQISENEk	A3QQQ3	N-Term(iTRAQ8plex); K5(iTRAQ8plex); K14(iTRAQ8plex)	11.02	0.968231	6	0.959099	6	0.885739	6	0.90864	6	0.970005	6	0.935254	6	4	2474.37	-5.20672
aATEEGGVTPSVYSR	B8ANH1	N-Term(iTRAQ8plex)	48.3	1.01715	2	1.32499	2	1.33543	2	1.07082	2	0.964304	2	1.11785	2	3	1827.93	-2.86678
aATEIIcSR	Q6H450	N-Term(iTRAQ8plex); C7(Carbamidomethyl)	11.46	0.995944	3	0.99605	3	1.02378	3	0.876302	3	0.936052	3	0.90687	3	2	1324.72	-2.68227
aATEQLHk	Q01K11	N-Term(iTRAQ8plex); K8(iTRAQ8plex)	16.21	1.12717	1	0.973848	1	0.986278	1	1.2082	1	1.11215	1	1.29518	1	3	1505.89	-2.83037
aATGDFAESNk	B9FXP5	N-Term(iTRAQ8plex); K11(iTRAQ8plex)	3.84	1.06368	1	1.47341	1	1.14331	1	1.10036	1	0.97581	1	1.00008	1	3	1718.92	-0.287551
aATGGFAAENIVSESGEk	A3ADU2	N-Term(iTRAQ8plex); K18(iTRAQ8plex)	43.35	0.976629	2	0.889934	2	0.918034	2	0.960325	2	0.883649	2	0.908941	2	3	2346.23	-2.24619
aATGVGVMMNDR	A2XAZ3	N-Term(iTRAQ8plex)	35.5	1.0426	3	1.03288	3	1.03515	3	1.0175	3	0.932982	3	1.01112	3	3	1525.78	0.792398
aATGVGVmMNDR	A2XAZ3	N-Term(iTRAQ8plex); M8(Oxidation)	45.5	1.04274	4	1.20783	4	1.29164	4	0.939584	4	0.952045	4	1.02491	4	3	1541.77	-2.72676
aATIALDHEQER	A2ZJC1	N-Term(iTRAQ8plex)	4.82	1.58188	1	2.44007	1	1.87942	1	1.35959	1	0.789129	1	1.11214	1	3	1657.88	0.476406
aATITDLDVk	B9FB84	N-Term(iTRAQ8plex); K10(iTRAQ8plex)	51.01	0.894897	1	0.801446	1	0.895225	1	1.07206	1	1.14141	1	1.126	1	2	1654.98	-1.26792
aATMEDVLR	Q6YU90	N-Term(iTRAQ8plex)	4.34	1.04626	1	1.03162	1	1.08411	1	0.974864	1	0.892614	1	1.02369	1	2	1309.71	-1.67269
aATTRPLVINk	H2KWA4	N-Term(iTRAQ8plex); K11(iTRAQ8plex)	7	1.05913	2	1.41507	2	1.12062	2	0.894667	2	0.719221	2	0.82196	2	3	1792.12	-1.67568
aAVAAHPLYER	Q0E3C3	N-Term(iTRAQ8plex)	16.22	1.38122	1	1.84159	1	1.65058	1	1.03025	1	0.820326	1	1.1394	1	3	1501.84	-0.645021
aAVDAATEGLSR	Q53JY9	N-Term(iTRAQ8plex)	8.97	1.22317	1	1.59734	1	1.25202	1	1.1287	1	1.19015	1	1.40221	1	3	1464.8	1.56449
aAVEAAcPR	Q9AS12;B8A753	N-Term(iTRAQ8plex); C7(Carbamidomethyl)	19.7													2	1248.66	-2.02204
aAVEDVQPDk	Q6K9T1	N-Term(iTRAQ8plex); K10(iTRAQ8plex)	53.04	1.05231	1	0.93559	1	0.903811	1	0.922786	1	1.08153	1	0.875579	1	2	1679.94	-3.65157
aAVESGTAPNR	Q2QPR0	N-Term(iTRAQ8plex)	38.54	1.19318	3	1.18194	3	1.36339	3	0.853641	3	0.827391	3	1.13348	3	2	1376.74	-1.33248
aAVETPEDR	Q9FU86	N-Term(iTRAQ8plex)	34.49	0.90618	2	0.98342	2	0.9376	2	0.81	2	0.911357	2	1.00306	2	2	1291.68	-3.09411
aAVGHPDTLGDcPFSQR	Q65XA0	N-Term(iTRAQ8plex); C12(Carbamidomethyl)	52.15	1.18263	9	1.31966	9	1.14197	9	0.943319	9	0.781027	9	0.935235	9	2	2132.05	-0.961648
aAVHIQAR	B8APL1	N-Term(iTRAQ8plex)	11.16	1.27853	1	2.30861	1	2.69499	1	1.30897	1	0.884074	1	1.79684	1	3	1169.7	-1.35643
aAVHSAcGAk	Q9ST80	N-Term(iTRAQ8plex); C7(Carbamidomethyl); K10(iTRAQ8plex)	38.42	0.864108	4	1.00307	4	0.81146	4	1.2054	4	1.09091	4	1.13531	4	2	1579.88	-1.79284
aAVIGDTIGDPLk	O80384;Q8H616;Q6H883	N-Term(iTRAQ8plex); K13(iTRAQ8plex)	75.48													2	1878.11	-2.8178
aAVkPGEGGGGSVAR	A2Z8F1	N-Term(iTRAQ8plex); K4(iTRAQ8plex)	29.76	1.11993	3	1.07445	3	1.01017	3	0.807422	3	0.705726	3	0.711519	3	4	1921.1	-3.00554
aAVLLLDNk	B8ARK5	N-Term(iTRAQ8plex); K9(iTRAQ8plex)	39.48	0.936455	3	0.751181	3	0.731359	3	0.787047	3	0.883862	3	0.825625	3	2	1564.98	-2.38765
aAVPAPEESk	Q337E7	N-Term(iTRAQ8plex); K10(iTRAQ8plex)	41.24	1.06835	3	1.01046	3	1.03835	3	0.937447	3	1.10868	3	0.957588	3	3	1606.92	-1.83671
aAVPSGASTGVYEALELR	Q42971;B8AK24	N-Term(iTRAQ8plex)	38.08													3	2095.13	-1.48053
aAVPVAPPk	Q761Y6	N-Term(iTRAQ8plex); K9(iTRAQ8plex)	21.02	1.28552	1	1.52071	1	1.2163	1	1.02085	1	1.02247	1	1.04437	1	3	1457.92	-3.46374
aAVSGQQQDWNSPAR	Q84QV5	N-Term(iTRAQ8plex)	56.86	1.16818	3	1.54463	3	1.55504	3	1.26937	3	1.20636	3	1.391	3	3	1918.96	-4.49945
aAVTNAPR	Q108X4	N-Term(iTRAQ8plex)	18.2	1.16698	1	1.19745	1	1.31429	1	0.761028	1	0.916712	1	1.01734	1	2	1103.64	-3.73595
aAVVDEESkk	B9F0T2	N-Term(iTRAQ8plex); K9(iTRAQ8plex); K10(iTRAQ8plex)	6.51	1.07539	2	0.929908	2	0.897164	2	0.624626	2	0.696851	2	0.589347	2	3	1988.17	-3.59683
aAVVEHDGGEER	B8AMS8	N-Term(iTRAQ8plex)	15.67	1.02244	1	1.50551	1	1.33686	1	1.0397	1	1.55024	1	2.06474	1	3	1572.79	-2.04085
aAVVGGNVLTSQR	Q8LHD1	N-Term(iTRAQ8plex)	44.43	1.13381	2	1.26395	2	1.26031	2	1.03449	2	1.03835	2	1.11147	2	3	1575.91	-2.34275
aAVVHGPVR	A2XFS8	N-Term(iTRAQ8plex)	30.72	0.934079	1	1.68269	1	1.26048	1	1.07298	1	0.95789	1	1.28715	1	3	1209.73	-3.63155
aAVVHPDR	A2XFS8	N-Term(iTRAQ8plex)	11.37	1.35931	1	1.84952	1	1.31547	1	1.25729	1	0.847878	1	1.01045	1	3	1168.67	-2.59926
aAVVPESVLk	Q6YYR2	N-Term(iTRAQ8plex); K10(iTRAQ8plex)	40.03	1.17529	11	1.23882	11	1.14176	11	1.10868	11	1.00628	11	0.929306	11	2	1621.01	-2.66616
aAWAPGDLGYNTR	A2YI72	N-Term(iTRAQ8plex)	46.67	0.994418	6	0.981995	6	0.99536	6	0.791708	6	0.838886	6	0.874978	6	2	1695.87	-3.38508
aAWAPGDLGyNTR	A2YI72	N-Term(iTRAQ8plex); Y10(iTRAQ8plex)	15.57	0.905808	5	0.95953	5	0.874226	5	0.976327	5	1.03941	5	1.00853	5	3	2000.07	-5.70334
aAYASSLEEDVAScSLFGDPLR	A2Y449	N-Term(iTRAQ8plex); C14(Carbamidomethyl)	61.17	0.92637	5	0.933837	5	1.00151	5	0.930869	5	0.934253	5	0.988891	5	3	2662.29	-1.9295
aAYEDLDDER	Q2R315	N-Term(iTRAQ8plex)	36.16	1.03878	2	0.991796	2	0.943126	2	1.1004	2	1.11591	2	1.18407	2	2	1500.71	-4.41888
aAYEEk	Q10SU0	N-Term(iTRAQ8plex); K6(iTRAQ8plex)	28.29	0.958406	1	0.857005	1	0.750548	1	1.16382	1	1.14304	1	0.973571	1	2	1318.74	-3.53864
aAYHEQFGGR	B7E4J4	N-Term(iTRAQ8plex)	18.88	1.07305	4	1.26727	4	1.21099	4	1.06577	4	1.02423	4	1.10948	4	3	1439.73	-0.480761
aAYPIEYIPNAk	A2XEP1	N-Term(iTRAQ8plex); K12(iTRAQ8plex)	34.93	0.839693	1	0.681305	1	0.670755	1	1.14395	1	1.13303	1	1.1432	1	2	1958.11	-2.97507
aAYSYYNVSTk	B9EZ31	N-Term(iTRAQ8plex); K11(iTRAQ8plex)	22.55	0.926662	1	0.972514	1	0.90244	1	0.936042	1	1.04305	1	0.927283	1	3	1875.01	-2.856
acAAQTNATFLk	A2XAQ0	N-Term(iTRAQ8plex); C2(Carbamidomethyl); K12(iTRAQ8plex)	64.26	0.995053	1	0.792114	1	0.783193	1	0.936073	1	0.978983	1	0.96623	1	2	1904.05	1.03851
acANASIAR	B7E640	N-Term(iTRAQ8plex); C2(Carbamidomethyl)	54.24	1.08779	2	1.25372	2	1.22074	2	0.890574	2	0.831977	2	0.994643	2	3	1237.66	-2.81587
acAQAVAASGAR	B8AMN4	N-Term(iTRAQ8plex); C2(Carbamidomethyl)	18.07	1.12735	1	1.35328	1	1.32114	1	1.13308	1	1.05306	1	1.2636	1	3	1436.76	-2.11184
acASASITR	B7ER70	N-Term(iTRAQ8plex); C2(Carbamidomethyl)	22.48	0.966977	2	1.02661	2	1.05034	2	0.846345	2	0.952655	2	1.16488	2	2	1240.66	-4.51661
accEASLER	Q109P3	N-Term(iTRAQ8plex); C2(Carbamidomethyl); C3(Carbamidomethyl)	2.77	0.899822	1	0.96745	1	0.94387	1	1.08076	1	1.04436	1	1.04206	1	2	1399.66	-3.65507
accEASLGR	Q5ZBH8	N-Term(iTRAQ8plex); C2(Carbamidomethyl); C3(Carbamidomethyl)	17.85	1.08814	1	1.12881	1	1.02172	1	0.715294	1	0.820255	1	0.661018	1	2	1327.64	-1.08606
accVVVEYLAGGTLk	Q75J49	N-Term(iTRAQ8plex); C2(Carbamidomethyl); C3(Carbamidomethyl); K15(iTRAQ8plex)	23.62	1.06579	24	1.16248	24	1.0434	24	0.991229	24	1.05071	24	1.08386	24	3	2248.23	0.877082
acDEQQHWk	A3CE45	N-Term(iTRAQ8plex); C2(Carbamidomethyl); K9(iTRAQ8plex)	32.55	0.974799	13	1.03553	13	0.944872	13	1.09575	13	1.10478	13	1.04722	13	3	1809.91	-1.52438
acDFLLSk	Q6Z2X6;H2KWF1;B9GB84	N-Term(iTRAQ8plex); C2(Carbamidomethyl); K8(iTRAQ8plex)	17.57													2	1561.87	-8.64775
acEAQVTSk	Q8S1T0	N-Term(iTRAQ8plex); C2(Carbamidomethyl); K9(iTRAQ8plex)	8.8	0.945959	1	0.804767	1	0.766332	1	0.815104	1	0.836694	1	0.829777	1	3	1601.88	-0.390762
acELQPTDVRPHFR	B9F767	N-Term(iTRAQ8plex); C2(Carbamidomethyl)	3.74	1.02093	1	1.41171	1	1.09278	1	1.08417	1	1.04528	1	1.30602	1	4	2030.05	-3.32858
acESQADPLk	Q67UE5	N-Term(iTRAQ8plex); C2(Carbamidomethyl); K10(iTRAQ8plex)	27.4	0.921765	2	0.813534	2	0.834107	2	0.979849	2	0.933887	2	0.87382	2	2	1726.92	-3.5834
acGAVIVNRPEELQESDVGTR	Q5Z6U5	N-Term(iTRAQ8plex); C2(Carbamidomethyl)	14.98	1.00348	13	1.07186	13	1.08234	13	1.01111	13	1.10017	13	0.928358	13	4	2604.33	-0.213385
acLADTIAQMHAYFNPNAQGAR	Q7X8H4	N-Term(iTRAQ8plex); C2(Carbamidomethyl)	30.06	0.999341	4	1.05466	4	0.942737	4	1.01171	4	1.03342	4	0.992099	4	3	2724.33	-0.822965
acLASAMEEMTR	A2YNY6	N-Term(iTRAQ8plex); C2(Carbamidomethyl)	6.8	1.08879	2	0.973106	2	1.02098	2	0.96656	2	1.04379	2	1.0102	2	2	1673.78	-8.17007
acLDQAPER	Q10A59	N-Term(iTRAQ8plex); C2(Carbamidomethyl)	40.8	0.921324	1	0.928312	1	0.912006	1	0.813391	1	0.932588	1	0.993139	1	2	1363.69	-2.98765
acLVVSDTck	Q6Z6K0	N-Term(iTRAQ8plex); C2(Carbamidomethyl); C9(Carbamidomethyl); K10(iTRAQ8plex)	39.28	0.798929	4	0.764104	4	0.746365	4	1.20173	4	1.19308	4	1.08407	4	2	1760.94	-4.79384
acNALHSAGPR	Q2QMK8	N-Term(iTRAQ8plex); C2(Carbamidomethyl)	16.45	1.02937	1	1.01406	1	0.941982	1	0.861356	1	0.853576	1	1.01277	1	3	1457.76	-2.30093
acNALLLk	B8AK24	N-Term(iTRAQ8plex); C2(Carbamidomethyl); K8(iTRAQ8plex)	21.97	0.922005	1	0.90606	1	0.918148	1	0.969812	1	1.05479	1	0.920919	1	2	1510.92	-3.75336
acNFILSk	Q0IT98	N-Term(iTRAQ8plex); C2(Carbamidomethyl); K8(iTRAQ8plex)	9.48	1.01425	2	0.891585	2	0.96034	2	0.963769	2	1.01731	2	0.921503	2	2	1560.91	2.06813
acNFSSGLIk	Q5W6W7	N-Term(iTRAQ8plex); C2(Carbamidomethyl); K10(iTRAQ8plex)	38.27	0.938319	2	0.901139	2	0.872311	2	0.914893	2	0.965058	2	0.907202	2	2	1704.95	-2.92311
acNVVTPPASR	Q852L3	N-Term(iTRAQ8plex); C2(Carbamidomethyl)	7.14	0.781414	1	0.731251	1	0.659299	1	0.822875	1	1.09298	1	1.00759	1	2	1475.8	4.05421
acPFILGNEccER	B9FB84	N-Term(iTRAQ8plex); C2(Carbamidomethyl); C10(Carbamidomethyl); C11(Carbamidomethyl)	28.76	0.872302	1	1.03936	1	0.946779	1	0.887214	1	1.24768	1	1.03622	1	2	1929.89	-0.417748
acPYILANEccER	Q9FU86	N-Term(iTRAQ8plex); C2(Carbamidomethyl); C10(Carbamidomethyl); C11(Carbamidomethyl)	39.8	0.978894	3	1.03642	3	0.906979	3	0.826527	3	0.880962	3	0.809704	3	3	1959.9	-0.382437
acSSAISSTAIDR	B8BE47	N-Term(iTRAQ8plex); C2(Carbamidomethyl)	77.79	0.744391	7	0.725016	7	0.888751	7	1.19731	7	1.26285	7	1.24858	7	3	1642.83	-2.99225
acTAEIEk	Q10MT2	N-Term(iTRAQ8plex); C2(Carbamidomethyl); K8(iTRAQ8plex)	34.02	0.928047	1	0.938515	1	0.925107	1	1.01079	1	1.02228	1	0.93845	1	2	1529.84	-3.74424
acVASAFADAR	Q7X8H4	N-Term(iTRAQ8plex); C2(Carbamidomethyl)	46.32	1.09117	14	1.04616	14	1.03894	14	0.852135	14	0.890886	14	0.899332	14	2	1442.74	-0.690451
acYDAAk	A2Z1P2	N-Term(iTRAQ8plex); C2(Carbamidomethyl); K7(iTRAQ8plex)	6.65	1.09267	1	1.1978	1	1.26032	1	1.13021	1	1.21685	1	1.17952	1	2	1406.75	-6.87683
acYEcLR	Q0IPF7;P0C510	N-Term(iTRAQ8plex); C2(Carbamidomethyl); C5(Carbamidomethyl)	3.54													2	1275.61	-1.73883
acyEcLR	Q0IPF7;P0C510	N-Term(iTRAQ8plex); C2(Carbamidomethyl); Y3(iTRAQ8plex); C5(Carbamidomethyl)	0.67													3	1579.81	-2.24772
aDAcAGcPNQQIcATAPk	A2X6V5	N-Term(iTRAQ8plex); C4(Carbamidomethyl); C7(Carbamidomethyl); C13(Carbamidomethyl); K18(iTRAQ8plex)	55.34	1.18819	1	0.984288	1	1.22534	1	1.16655	1	1.28095	1	1.09658	1	3	2541.24	-4.21611
aDAcLAALAR	E3SC17	N-Term(iTRAQ8plex); C4(Carbamidomethyl)	15.9	1.17538	1	1.33302	1	1.49621	1	0.887408	1	0.911642	1	1.00886	1	3	1335.73	-2.17416
aDADAEFk	C6F1P3	N-Term(iTRAQ8plex); K8(iTRAQ8plex)	28.2	0.964795	1	0.864785	1	0.820194	1	0.916149	1	0.876944	1	0.912475	1	3	1474.79	-3.91295
aDAESATAR	B8B8M4	N-Term(iTRAQ8plex)	28.9	0.866561	1	0.900191	1	0.884894	1	0.961111	1	1.02605	1	0.984637	1	2	1195.62	-2.19881
aDALAAGLPR	A3BL52	N-Term(iTRAQ8plex)	19.14	1.34651	3	1.54505	3	2.12568	3	1.11841	3	1.08877	3	1.86472	3	2	1258.74	-1.76012
aDATPEDIIQIEk	A2WTS1	N-Term(iTRAQ8plex); K13(iTRAQ8plex)	33.9	1.04576	1	0.985907	1	1.06391	1	0.90403	1	0.892452	1	0.933777	1	3	2051.14	-4.43661
aDDATHFLDVIR	A3CE45	N-Term(iTRAQ8plex)	51.15	0.949558	68	0.945525	68	0.924282	68	1.01547	68	1.03214	68	1.01201	68	3	1676.89	-0.956465
aDDEPADDNHTmTTGR	B9GBE8	N-Term(iTRAQ8plex); M12(Oxidation)	51.49	1.22141	1	1.35086	1	1.37505	1	1.34023	1	1.25414	1	1.31456	1	3	2065.9	-0.866345
aDDGNYNLVLR	B9G348	N-Term(iTRAQ8plex)	4.54	0.958538	1	0.969564	1	1.00583	1	1.03501	1	1.07731	1	1.09175	1	2	1553.82	0.239587
aDDTMNLGGIk	A6N1J2	N-Term(iTRAQ8plex); K11(iTRAQ8plex)	46.69	1.11413	1	1.11336	1	1.06225	1	1.25738	1	1.30749	1	1.17816	1	2	1742.94	-7.37031
aDDVPLPVR	Q0JFE2	N-Term(iTRAQ8plex)	21.75	1.21622	1	1.26254	1	1.34289	1	0.866467	1	0.838526	1	0.960152	1	2	1285.73	-5.54124
aDEETIDk	Q5VRF6	N-Term(iTRAQ8plex); K8(iTRAQ8plex)	32.13	1.09797	1	0.90174	1	0.933932	1	0.789984	1	0.833017	1	0.801144	1	2	1528.82	-6.24944
aDEFIIk	Q942L2	N-Term(iTRAQ8plex); K7(iTRAQ8plex)	28.27	0.894674	1	0.84008	1	0.822242	1	1.00885	1	0.987211	1	0.927018	1	2	1443.86	-4.49088
aDEGYcLTVR	Q6Z4N7	N-Term(iTRAQ8plex); C6(Carbamidomethyl)	7.41	0.866739	1	0.948542	1	0.926846	1	0.996631	1	0.947056	1	0.924772	1	2	1487.74	-3.42978
aDEGYcVAVR	Q10M12	N-Term(iTRAQ8plex); C6(Carbamidomethyl)	59.87	0.835173	11	0.763524	11	0.825267	11	1.02199	11	1.06955	11	1.06417	11	3	1443.72	-1.26394
aDEGycVAVR	Q10M12	N-Term(iTRAQ8plex); Y5(iTRAQ8plex); C6(Carbamidomethyl)	4.48	0.866039	1	0.795556	1	0.768545	1	1.14858	1	1.26527	1	1.15562	1	3	1747.92	-4.64473
aDEHVDVTNPATQEVVSR	O49218	N-Term(iTRAQ8plex)	55.08	0.995482	20	1.03285	20	0.957308	20	1.08447	20	1.12373	20	1.09149	20	3	2271.15	-2.72824
aDEkDLMGk	Q7XTK1	N-Term(iTRAQ8plex); K4(iTRAQ8plex); K9(iTRAQ8plex)	4.37	1.04963	1	1.04046	1	1.08729	1	0.976384	1	0.98305	1	0.970961	1	3	1919.1	-1.8298
aDELQPHPPk	Q6H5A2	N-Term(iTRAQ8plex); K10(iTRAQ8plex)	15.13	1.29821	2	1.7493	2	1.32828	2	1.24952	2	0.870164	2	1.0539	2	3	1739.99	-1.04422
aDESHEFLSDDVENR	A2YPI9	N-Term(iTRAQ8plex)	32.32	1.12059	2	1.24987	2	1.14608	2	1.12354	2	0.862792	2	0.929498	2	3	2066.96	-0.688361
aDETLAAMAQLEk	Q8S718	N-Term(iTRAQ8plex); K13(iTRAQ8plex)	51.51	1.03687	50	0.930535	50	0.955695	50	0.876301	50	0.926051	50	0.878259	50	2	1999.1	-1.47285
aDEVDIANLDPR	Q8GU86	N-Term(iTRAQ8plex)	43.11	1.00836	1	0.958662	1	0.967515	1	0.96131	1	0.934238	1	0.995772	1	3	1631.85	-1.15279
aDEVVAVEk	Q5TKJ2	N-Term(iTRAQ8plex); K9(iTRAQ8plex)	48.86	0.954849	15	1.00083	15	0.96585	15	1.15081	15	0.97364	15	1.08834	15	2	1567.91	-4.34241
aDGELLAVLR	A2ZAG4	N-Term(iTRAQ8plex)	18.63	0.924871	5	0.929542	5	0.948034	5	1.03244	5	1.00956	5	0.89546	5	3	1360.81	-0.311381
aDGFAGVFPEHk	Q7XPY2;Q8L6I2;Q8L6I1;Q8L6I3	N-Term(iTRAQ8plex); K12(iTRAQ8plex)	71.92													3	1883.02	-3.53652
aDGGAGWPAVEk	Q2R351	N-Term(iTRAQ8plex); K12(iTRAQ8plex)	50.23	0.882321	2	0.94187	2	1.14024	2	1.01421	2	0.971136	2	0.862437	2	2	1765.97	-0.941316
aDGNYGDDNEk	A2YWY6	N-Term(iTRAQ8plex); K11(iTRAQ8plex)	36.95	0.836918	1	0.735339	1	0.746959	1	0.872759	1	1.07521	1	0.942776	1	3	1805.87	-2.2459
aDGRPNAYDR	B9EUV1	N-Term(iTRAQ8plex)	7.07	0.937948	1	1.07872	1	1.01666	1	1.08435	1	1.10621	1	1.14326	1	3	1438.73	-1.65299
aDGYILEGk	P49199;Q0JDZ7	N-Term(iTRAQ8plex); K9(iTRAQ8plex)	20.55													2	1573.89	-7.06597
aDHNIPEk	A2YCC0	N-Term(iTRAQ8plex); K8(iTRAQ8plex)	6.34	1.09649	1	1.42204	1	1.1619	1	1.0759	1	0.984247	1	1.13194	1	3	1531.86	-2.71701
aDHQQDTIER	B8A8V6	N-Term(iTRAQ8plex)	6.82	1.03971	1	1.95368	1	1.24223	1	1.22339	1	0.797925	1	1.07322	1	3	1516.76	-6.04307
aDIcQLGMDQR	Q6Z0P0	N-Term(iTRAQ8plex); C4(Carbamidomethyl)	31.93	1.03343	1	1.06942	1	0.997937	1	0.899319	1	0.956033	1	0.87788	1	2	1610.79	-3.64057
aDIELLk		N-Term(iTRAQ8plex); K7(iTRAQ8plex)	12.73													3	1409.88	0.525241
aDIGIAVADATDAAR	Q7XPY2;Q8L6I1;Q8L6I3	N-Term(iTRAQ8plex)	95.56													3	1733.93	-3.1175
aDIGIAVDDSTDAAR	Q8L6I2	N-Term(iTRAQ8plex)	45.12	1.08994	2	1.13626	2	1.21691	2	0.89625	2	0.909998	2	0.948921	2	2	1793.92	-0.045047
aDIPTADLVEk	Q2QS12	N-Term(iTRAQ8plex); K11(iTRAQ8plex)	36.04	0.863792	1	0.847743	1	0.832461	1	0.882159	1	1.06181	1	0.918991	1	2	1780.03	1.17497
aDLDATVGAFk	Q336W0	N-Term(iTRAQ8plex); K11(iTRAQ8plex)	29.48	0.97428	2	0.882064	2	0.857406	2	0.940205	2	0.970052	2	0.905908	2	2	1715.98	1.18373
aDLEGSDVAAk	A2WNI6;B8BJD1	N-Term(iTRAQ8plex); K11(iTRAQ8plex)	33.96													3	1683.93	-3.53379
aDLNVPLDDAQk	Q6H6C7	N-Term(iTRAQ8plex); K12(iTRAQ8plex)	52.85	0.98566	5	1.00762	5	0.936403	5	0.849061	5	0.918498	5	0.819807	5	2	1907.07	-1.44898
aDLNVPLDDNQNITDDTR	A2Y650	N-Term(iTRAQ8plex)	56.57	1.03021	2	0.846102	2	1.00707	2	1.06348	2	0.960935	2	1.06903	2	3	2333.14	-3.97823
aDLPAFAPGAVTGPVVR	Q6ZIF9	N-Term(iTRAQ8plex)	25.25	1.00256	2	1.07429	2	1.24118	2	1.11853	2	1.08855	2	1.28564	2	3	1942.11	-0.352327
aDLQEPLVRPk	Q8RU48	N-Term(iTRAQ8plex); K11(iTRAQ8plex)	20.24	0.811908	5	1.02336	5	0.826521	5	1.03679	5	0.912044	5	0.928905	5	3	1874.13	-2.51255
aDLTEVTHk	A3BFA0	N-Term(iTRAQ8plex); K9(iTRAQ8plex)	53.41	0.910456	9	0.885197	9	0.846412	9	1.03601	9	1.08799	9	1.02023	9	3	1621.93	-3.33466
aDLYDRPAAR	Q33B25	N-Term(iTRAQ8plex)	15.68	1.02302	1	1.25654	1	1.17597	1	1.03652	1	0.994393	1	1.1521	1	3	1451.79	0.192886
aDLYGkPPQPAADAR	B9FNR7	N-Term(iTRAQ8plex); K6(iTRAQ8plex)	16.69	1.16923	1	1.64912	1	1.18443	1	0.978917	1	0.761756	1	0.885719	1	4	2178.21	-1.22926
aDMDESk	Q84TA8;Q6L502;Q7XHP7	N-Term(iTRAQ8plex); K7(iTRAQ8plex)	13.68													2	1403.72	-3.40536
aDNLLESLR	Q10EY3	N-Term(iTRAQ8plex)	17.61	1.09	1	0.991343	1	1.09623	1	0.953825	1	1.01735	1	0.975646	1	2	1334.76	-1.41458
aDNLYLEGFR	A2WL36	N-Term(iTRAQ8plex)	17.07	1.04037	2	1.05497	2	1.04794	2	0.890447	2	0.878776	2	0.83954	2	2	1501.79	-1.01381
aDPASDEAk	C6YXK7	N-Term(iTRAQ8plex); K9(iTRAQ8plex)	26.08	0.921344	1	0.898105	1	0.895753	1	0.948086	1	0.990955	1	0.968586	1	3	1511.81	-4.76065
aDPcTAWAGVR	Q75GV0	N-Term(iTRAQ8plex); C4(Carbamidomethyl)	6.2	1.07215	1	1.01053	1	1.07337	1	0.937706	1	0.95956	1	1.12831	1	2	1507.75	-5.31578
aDPNFDDSPWPTVSAEAk	B8B2H8	N-Term(iTRAQ8plex); K18(iTRAQ8plex)	25.2	0.985047	3	0.867198	3	0.930286	3	0.970743	3	1.07224	3	0.998741	3	3	2555.28	-2.28192
aDPTMAk	B7SDE4;A3A0I1	N-Term(iTRAQ8plex); K7(iTRAQ8plex)	7.15													2	1341.75	-8.09608
aDPVSDEAk	Q6Z9F9	N-Term(iTRAQ8plex); K9(iTRAQ8plex)	28.12	1.11984	6	1.19564	6	1.09105	6	1.15963	6	0.967621	6	0.957946	6	2	1539.84	-3.90497
aDQPLAVYSVDk	Q6AUG4	N-Term(iTRAQ8plex); K12(iTRAQ8plex)	54.72	1.20744	13	1.38295	13	1.12063	13	1.18678	13	0.921714	13	0.977415	13	2	1914.08	1.20646
aDQSLFEAGVAR	B8B0Q4	N-Term(iTRAQ8plex)	22.71	1.16819	2	1.07843	2	1.18061	2	0.984095	2	1.01481	2	1.00557	2	2	1567.84	-0.258411
aDQVDTQQLMR	A2YGE4	N-Term(iTRAQ8plex)	35.23	1.02529	1	1.02989	1	1.21465	1	0.917911	1	0.875224	1	0.964334	1	2	1608.83	-1.23803
aDRDESSPYAAmLASQDVAQR	A6MZM7	N-Term(iTRAQ8plex); M12(Oxidation)	57.65	1.1989	4	1.19378	4	1.20314	4	1.20577	4	0.984809	4	1.09355	4	3	2601.25	-2.53146
aDRDESSPYAAMLASQDVAQR	A6MZM7	N-Term(iTRAQ8plex)	52.58	1.10578	15	0.933815	15	1.03731	15	1.00118	15	1.02205	15	1.06241	15	3	2585.25	-1.30323
aDSAANLASLAR	Q33B25	N-Term(iTRAQ8plex)	36.9	0.997373	3	1.0108	3	1.04428	3	0.934671	3	0.959948	3	0.998591	3	2	1463.81	0.0396345
aDSFEk	A2XGN6;Q7F0M8	N-Term(iTRAQ8plex); K6(iTRAQ8plex)	14.23													2	1304.72	-5.71705
aDSQVFLFANSk	Q75KZ3	N-Term(iTRAQ8plex); K12(iTRAQ8plex)	36.02	0.9133	4	0.891462	4	0.8163	4	0.968659	4	0.96917	4	0.898794	4	2	1935.07	-5.54298
aDSQVFLFSNSk	Q8L3Y6	N-Term(iTRAQ8plex); K12(iTRAQ8plex)	49.21	0.918854	1	0.952196	1	0.848808	1	1.05618	1	1.01931	1	1.0192	1	2	1951.07	-1.01172
aDTIDEAVDSSETVPSAR	Q6ZIG4	N-Term(iTRAQ8plex)	37.07	0.981877	1	1.0511	1	1.097	1	1.29093	1	1.15773	1	1.06353	1	2	2167.07	-0.300679
aDTNLSAVSSVR	Q6I5Y4	N-Term(iTRAQ8plex)	14.16	1.0867	2	1.17303	2	1.20553	2	1.01646	2	1.00967	2	1.07848	2	2	1523.83	-1.8056
aDTSDESDEQAIcHR	Q0E3F2	N-Term(iTRAQ8plex); C13(Carbamidomethyl)	62.27	1.62234	1	2.19662	1	1.6791	1	1.52736	1	1.16047	1	1.16459	1	3	2037.9	-2.61686
aDVADEAGVR	A3BL52	N-Term(iTRAQ8plex)	22.61	1.07322	1	1.17683	1	1.084	1	0.910749	1	0.892766	1	0.89354	1	2	1306.68	-6.64355
aDVDAELEGVAR	B9FFH1	N-Term(iTRAQ8plex)	34.64	1.0418	4	1.14972	4	1.12528	4	0.877449	4	0.955352	4	0.96437	4	2	1548.81	-4.79163
aDVDMDAIR	B7E4J4	N-Term(iTRAQ8plex)	22.33	0.938563	8	0.995964	8	1.01522	8	1.05913	8	1.06416	8	1.05613	8	2	1309.67	-2.22965
aDVDmDAIR	B7E4J4	N-Term(iTRAQ8plex); M5(Oxidation)	15.33	1.14839	1	0.948917	1	3.03322	1	1.02113	1	0.87883	1	1.63173	1	2	1325.67	-1.49774
aDVFVTSk	A2Z4G9	N-Term(iTRAQ8plex); K8(iTRAQ8plex)	18.49	1.06692	1	0.901383	1	0.903885	1	0.872278	1	0.91543	1	0.898492	1	2	1474.87	-2.21105
aDVLAAVk	Q01IF7	N-Term(iTRAQ8plex); K8(iTRAQ8plex)	35.5	0.879314	2	0.881976	2	0.843589	2	1.01185	2	1.02122	2	0.910229	2	3	1394.88	-2.27262
aDVVQGAYDk	Q8LLN9	N-Term(iTRAQ8plex); K10(iTRAQ8plex)	7.31	0.901791	1	0.901301	1	0.889756	1	0.996927	1	0.935973	1	0.976163	1	2	1673.92	-8.72049
aDYAVEVGR	A6N0M9	N-Term(iTRAQ8plex)	9.76	1.2378	6	1.18103	6	1.22731	6	0.805546	6	0.766133	6	0.806122	6	2	1283.69	-2.37456
aDYDYLIk	Q84TA8;Q6L502;Q7XHP7	N-Term(iTRAQ8plex); K8(iTRAQ8plex)	53.51													2	1608.9	-2.72016
aDYLQDAk	Q9AUR8	N-Term(iTRAQ8plex); K8(iTRAQ8plex)	10.57	0.93116	2	0.825519	2	0.858382	2	0.97353	2	1.08517	2	0.991578	2	2	1531.84	-11.428
aEAAAAAASASGPR	B9FLM3	N-Term(iTRAQ8plex)	14.45	1.19233	1	1.97267	1	1.81914	1	1.36091	1	1.13553	1	1.57587	1	3	1504.8	-2.36787
aEAAADEPAkEESk	Q8RYZ1	N-Term(iTRAQ8plex); K10(iTRAQ8plex); K14(iTRAQ8plex)	13.21	1.01968	3	1.23807	3	0.925117	3	1.21105	3	1.05461	3	0.908718	3	4	2358.29	-0.916717
aEAAADEPAkQESk	A2WXH7	N-Term(iTRAQ8plex); K10(iTRAQ8plex); K14(iTRAQ8plex)	14.94	0.951413	1	1.07165	1	0.969628	1	1.22317	1	0.891136	1	1.03231	1	4	2357.28	-12.046
aEAAAEEAkPAEPETEEk	Q5TKJ2	N-Term(iTRAQ8plex); K9(iTRAQ8plex); K18(iTRAQ8plex)	37.08	1.05605	8	1.12931	8	1.01894	8	1.09826	8	1.05401	8	1.08101	8	4	2812.5	1.10864
aEAAPAEEAkPAEPEPEEk	Q8RYZ1;A2WXH7	N-Term(iTRAQ8plex); K10(iTRAQ8plex); K19(iTRAQ8plex)	25.81													4	2905.55	-2.95964
aEADFDPLLk	B9FJ36	N-Term(iTRAQ8plex); K10(iTRAQ8plex)	42.22	0.797653	4	0.714073	4	0.736105	4	1.02026	4	1.08614	4	0.982105	4	2	1726.98	-2.98796
aEAEAEAEAAATEEPk	Q5TKJ2	N-Term(iTRAQ8plex); K16(iTRAQ8plex)	85.93	0.994101	46	0.903883	46	0.960325	46	1.02516	46	1.06949	46	1.01147	46	2	2225.14	-1.08344
aEAEDDEEALk	Q6YW62	N-Term(iTRAQ8plex); K11(iTRAQ8plex)	75.12	0.866328	3	0.789422	3	0.737542	3	1.04727	3	1.12127	3	1.0322	3	2	1827.93	-5.99734
aEAEGALPVLGHR	B9GAQ3	N-Term(iTRAQ8plex)	24.07	1.35745	2	1.83778	2	1.49361	2	1.37868	2	0.915189	2	1.07652	2	3	1623.9	-7.1282
aEAFLEQAVLR	Q7Y1F9	N-Term(iTRAQ8plex)	31.55	1.01778	2	0.86386	2	0.951739	2	1.02375	2	1.20837	2	1.16861	2	3	1550.88	-0.949509
aEAGVGGINPSIR	A2YL37	N-Term(iTRAQ8plex)	31.24	0.973146	1	1.01696	1	1.01359	1	1.00216	1	0.935608	1	0.949925	1	2	1544.87	-2.72717
aEAHEPLk	Q2QX92	N-Term(iTRAQ8plex); K8(iTRAQ8plex)	21.94	0.871871	1	1.06125	1	0.979639	1	1.03286	1	1.02912	1	0.965181	1	2	1502.88	-2.282
aEALEMFAENk	B9G059	N-Term(iTRAQ8plex); K11(iTRAQ8plex)	15.87	0.951813	4	0.990536	4	0.98623	4	1.03536	4	1.14432	4	1.02576	4	3	1860.99	-3.92542
aEANLGNVLk	Q6Z6L4	N-Term(iTRAQ8plex); K10(iTRAQ8plex)	21.13	0.897797	1	0.962319	1	0.833734	1	0.891058	1	0.880876	1	0.855027	1	2	1636.98	-3.70456
aEASSEEAk	Q8RYZ1;A2WXH7	N-Term(iTRAQ8plex); K9(iTRAQ8plex)	28.1													3	1529.83	-0.895035
aEATDVANAVLDGSDAILLGAETLR	Q2QXR8;Q2RAK2	N-Term(iTRAQ8plex)	76.71													3	2789.48	-2.07386
aEAVASGDGGEGGR	A2X8C2	N-Term(iTRAQ8plex)	60.11	1.01217	2	0.924097	2	1.10624	2	0.821385	2	1.00552	2	1.14273	2	2	1536.75	-2.20363
aEAVDHLASR	B8BCN9	N-Term(iTRAQ8plex)	12.32	1.04373	1	1.20559	1	1.13543	1	1.07326	1	1.09128	1	1.22707	1	3	1372.75	0.577686
aEcSVTSEWSPDGR	Q6K8R0	N-Term(iTRAQ8plex); C3(Carbamidomethyl)	37.66	0.999901	1	0.892776	1	0.991248	1	0.845159	1	0.9755	1	0.982726	1	2	1884.88	4.81761
aEDDYDYLFk	Q94J09;P40393;A2Y6J2	N-Term(iTRAQ8plex); K10(iTRAQ8plex)	45.5													2	1886.96	-2.87236
aEDEEHk	Q943K7;Q10NA9;Q6L509	N-Term(iTRAQ8plex); K7(iTRAQ8plex)	13.51													3	1465.77	-2.09271
aEDLAQPLVDAQIPFk	Q5ZAV7	N-Term(iTRAQ8plex); K16(iTRAQ8plex)	28.73	0.947494	4	0.883437	4	0.972373	4	0.874893	4	0.968347	4	0.848938	4	3	2363.35	4.73985
aEDPEVAR	A2YD35	N-Term(iTRAQ8plex)	1.69	1.34002	1	1.62358	1	1.86447	1	0.92794	1	0.989942	1	1.37789	1	3	1190.63	-3.28141
aEDVGEEVER	B8B9C4	N-Term(iTRAQ8plex)	45.25	1.09946	5	1.1807	5	1.16767	5	0.917669	5	0.886968	5	0.943245	5	2	1436.71	-4.17212
aEDVIGPDVEk	A2Y650	N-Term(iTRAQ8plex); K11(iTRAQ8plex)	49.33	0.9498	4	0.855027	4	0.87223	4	1.00795	4	1.05122	4	0.980391	4	2	1779.99	-3.21236
aEDVQGk	P49397	N-Term(iTRAQ8plex); K7(iTRAQ8plex)	28.07	0.755594	1	0.659364	1	0.733164	1	1.01144	1	1.06183	1	0.838955	1	2	1354.77	-4.54893
aEEAAAAAGDGLSEFQk	Q7XV86	N-Term(iTRAQ8plex); K17(iTRAQ8plex)	100.08	0.950437	6	0.794316	6	0.81996	6	1.06384	6	1.06429	6	1.06667	6	3	2273.18	-1.47474
aEEDGGMSGSAWR	Q6ZCF8	N-Term(iTRAQ8plex)	48.17	0.849106	1	0.798419	1	0.758542	1	1.00383	1	1.00999	1	0.985828	1	2	1656.75	-4.07812
aEEEDAVEEDTDSk	Q6ZGL9	N-Term(iTRAQ8plex); K14(iTRAQ8plex)	18.67	1.00732	1	0.905544	1	1.07115	1	1.08308	1	1.02305	1	1.00309	1	3	2175.03	-3.8087
aEEEEAPk	Q6K4S7	N-Term(iTRAQ8plex); K8(iTRAQ8plex)	38.41	1.17316	2	1.24538	2	1.00425	2	1.37215	2	0.954453	2	0.925032	2	3	1510.82	-2.35293
aEEEEAPkA	Q6K4S7	N-Term(iTRAQ8plex); K8(iTRAQ8plex)	24.66	0.730609	1	0.693326	1	0.753979	1	0.99258	1	0.987381	1	0.863099	1	2	1581.85	-2.84355
aEEEFEk	Q84VE1	N-Term(iTRAQ8plex); K7(iTRAQ8plex)	25.73	1.03839	2	1.02015	2	0.951153	2	0.885615	2	0.890522	2	0.829346	2	2	1489.79	-3.43147
aEEEPk	Q8RYZ1;A2WXH7	N-Term(iTRAQ8plex); K6(iTRAQ8plex)	29.85													2	1310.74	-3.78997
aEEIMGQAMR	Q40648	N-Term(iTRAQ8plex)	31.68	1.0634	3	1.05584	3	1.08874	3	0.869639	3	0.886505	3	0.971321	3	2	1439.73	-1.91667
aEEIPEEEk	B9GBA5;B9GD70	N-Term(iTRAQ8plex); K9(iTRAQ8plex)	20.97													3	1681.9	-8.38033
aEELAAk	Q9XEA6	N-Term(iTRAQ8plex); K7(iTRAQ8plex)	13.97	1.01295	2	0.918311	2	0.957827	2	0.904504	2	0.966148	2	0.876864	2	2	1339.8	-5.67617
aEEmAAk	Q7XMK5	N-Term(iTRAQ8plex); M4(Oxidation); K7(iTRAQ8plex)	25.85	1.0007	2	0.841279	2	0.805363	2	1.08821	2	0.949807	2	0.874949	2	2	1373.75	-4.41787
aEEMAAk	Q7XMK5	N-Term(iTRAQ8plex); K7(iTRAQ8plex)	17.44	0.939378	7	0.870731	7	0.876643	7	1.02326	7	0.983682	7	0.970075	7	3	1357.76	-0.987538
aEENPLQVPPR	A2YWY6	N-Term(iTRAQ8plex)	23.3	1.0756	4	1.26843	4	1.51494	4	1.04754	4	1.02603	4	1.11252	4	2	1553.86	-1.50356
aEENVDDEVGR	Q5QMN8	N-Term(iTRAQ8plex)	38.39	1.54071	1	0.97455	1	1.13318	1	1.15249	1	0.905285	1	1.14092	1	2	1536.74	-3.85907
aEETkAEEEPk	Q8RYZ1	N-Term(iTRAQ8plex); K5(iTRAQ8plex); K11(iTRAQ8plex)	7	0.900231	1	0.782471	1	0.791067	1	1.06561	1	1.03527	1	1.01778	1	3	2173.2	-5.71529
aEETLAALAQLEk	Q945W5	N-Term(iTRAQ8plex); K13(iTRAQ8plex)	17.56	1.02287	2	0.91938	2	0.906788	2	0.834586	2	0.942838	2	0.848645	2	3	1995.16	-1.52106
aEFGPSQPFk	Q84VE1	N-Term(iTRAQ8plex); K10(iTRAQ8plex)	37.61	1.06083	18	1.05786	18	1.07597	18	1.00991	18	1.00982	18	0.924651	18	2	1715.95	-4.92145
aEFPSQDQPAADTGADTTPFk	A2ZVD7	N-Term(iTRAQ8plex); K21(iTRAQ8plex)	40.29	1.07656	1	1.01942	1	1.11731	1	0.891112	1	0.895276	1	0.902699	1	3	2802.41	1.48805
aEGAAMGPAVcR	B8B864	N-Term(iTRAQ8plex); C11(Carbamidomethyl)	23.06	1.3862	1	1.90414	1	2.38011	1	1.29923	1	1.24182	1	1.67826	1	3	1493.75	-2.70367
aEGADLLPAEASPAk	Q8LR62	N-Term(iTRAQ8plex); K15(iTRAQ8plex)	68.33	1.06654	2	0.966108	2	1.01175	2	0.966061	2	0.948857	2	0.929973	2	2	2048.15	-0.941986
aEGDAESk	Q6ZIV7	N-Term(iTRAQ8plex); K8(iTRAQ8plex)	37.4	0.838577	3	1.00954	3	0.809792	3	1.1051	3	0.629571	3	0.771268	3	2	1414.76	-1.51491
aEGDDGDDDGPAAAGDHGATPR	Q6Z338	N-Term(iTRAQ8plex)	81.25	0.59276	1	0.891108	1	0.591129	1	1.15988	1	1.68983	1	1.16593	1	3	2371.03	-1.663
aEGEAEAk	Q6L4S3	N-Term(iTRAQ8plex); K8(iTRAQ8plex)	28.79	1.00378	4	0.862722	4	0.750406	4	0.930631	4	1.00401	4	0.850789	4	2	1412.78	-4.53273
aEGVDLSAYGSSk	A2Y3J4	N-Term(iTRAQ8plex); K13(iTRAQ8plex)	57.05	1.16549	1	1.01876	1	0.984035	1	0.676631	1	0.776175	1	0.667838	1	2	1892.02	-1.88107
aEISDESDHk	A3AIT4	N-Term(iTRAQ8plex); K10(iTRAQ8plex)	22.09	1.10575	1	1.11254	1	1.19116	1	0.917948	1	0.822205	1	0.845351	1	3	1738.9	-3.87183
aEkPAAAAAAAAPk	B9FFP1	N-Term(iTRAQ8plex); K3(iTRAQ8plex); K14(iTRAQ8plex)	21.85	1.07081	1	1.08908	1	0.921309	1	1.17088	1	1.00001	1	1.07924	1	3	2150.3	-2.33537
aELEAAAGGAR	A2Z916	N-Term(iTRAQ8plex)	16.95	1.07797	1	0.987278	1	1.01507	1	0.87371	1	0.880498	1	0.866649	1	2	1319.72	-2.52607
aELGEEPGDAPR	Q6Z4F3	N-Term(iTRAQ8plex)	51.69	1.02955	4	0.929187	4	1.09642	4	0.968251	4	0.972918	4	1.01345	4	2	1544.78	-2.08504
aELGSHVR	Q2R3W2	N-Term(iTRAQ8plex)	11.14	0.984347	2	1.1745	2	0.89604	2	1.03783	2	0.967795	2	1.05456	2	3	1172.66	-3.45469
aELLDPAVk	A2WQX7	N-Term(iTRAQ8plex); K9(iTRAQ8plex)	13.57	1.05791	1	0.990374	1	0.973342	1	1.04704	1	0.98881	1	0.869112	1	2	1563.96	1.91247
aELQAQLk	B8AT03	N-Term(iTRAQ8plex); K8(iTRAQ8plex)	53.11	0.832865	3	0.791722	3	0.783065	3	1.00234	3	1.05793	3	0.983401	3	2	1508.92	-4.42594
aELSPAR	A2WT67	N-Term(iTRAQ8plex)	3.56	0.998329	1	1.05012	1	1.21507	1	0.946553	1	1.03546	1	1.37818	1	2	1047.61	-4.19326
aEMEAELk	Q10SU0	N-Term(iTRAQ8plex); K8(iTRAQ8plex)	14.21	0.959721	1	0.832105	1	0.854539	1	0.947661	1	1.06984	1	0.974293	1	2	1528.84	-4.78811
aEPESSTAAAGGSR	Q6F2Z1	N-Term(iTRAQ8plex)	32.75	0.916761	1	0.818482	1	0.933628	1	0.896107	1	0.96177	1	0.919865	1	3	1594.8	-0.205673
aEPLVVHPVPR	A2Z5X0	N-Term(iTRAQ8plex)	45.55	1.13721	3	1.41081	3	1.10431	3	0.986047	3	0.85038	3	1.03362	3	3	1517.91	-2.2143
aEPPPVAAQGR	A2Y8G4	N-Term(iTRAQ8plex)	30.26	1.28155	3	1.37777	3	1.87966	3	1.38072	3	1.02765	3	1.25326	3	3	1396.78	-2.09242
aEPSAAAQDDEEVDESGVEPk	Q8RUI4	N-Term(iTRAQ8plex); K21(iTRAQ8plex)	72.22	0.874116	2	0.89952	2	1.04641	2	0.830379	2	1.00893	2	0.944106	2	3	2781.34	-3.51911
aEPSQPPGYPPR	Q7XIM0	N-Term(iTRAQ8plex)	3.25	1.45561	1	1.79459	1	1.50413	1	1.05361	1	1.20474	1	1.27046	1	3	1599.84	-0.989062
aEQDAQIGHDk	Q10LT8	N-Term(iTRAQ8plex); K11(iTRAQ8plex)	54.32	0.983677	1	1.03754	1	0.906705	1	1.1082	1	1.08604	1	1.0282	1	3	1819.97	-3.43009
aEQHLVR	B8AIL1;B9FXY9;Q651V0	N-Term(iTRAQ8plex)	7.95													2	1156.67	-1.60336
aEQMLINNPSR	P37833	N-Term(iTRAQ8plex)	32.8	1.09865	2	1.08255	2	1.1012	2	0.907277	2	0.921066	2	0.89696	2	2	1576.84	-1.98409
aEQSESMVQEIcR	B8A7T6	N-Term(iTRAQ8plex); C12(Carbamidomethyl)	26.26	0.98397	1	0.865414	1	1.08608	1	1.06766	1	0.974998	1	0.977448	1	2	1870.89	-1.11708
aESAPAEPLkDEL	K4FHN8	N-Term(iTRAQ8plex); K10(iTRAQ8plex)	25.02	0.904549	2	0.802205	2	0.812532	2	1.0808	2	1.05699	2	1.03278	2	2	1978.09	-0.970587
aESPAMDSk	A2YQC8	N-Term(iTRAQ8plex); K9(iTRAQ8plex)	19.08	0.910286	2	0.927326	2	1.01144	2	1.09351	2	1.08137	2	1.00022	2	3	1543.82	-4.88368
aESTGDVAAAEPAPVSA	A2XNF0	N-Term(iTRAQ8plex)	71.58	1.08694	4	1.07912	4	1.21921	4	0.864732	4	0.966927	4	0.931424	4	2	1846.93	-2.98502
aETHSVDFQTk	Q75H81	N-Term(iTRAQ8plex); K11(iTRAQ8plex)	26.37	1.03076	1	1.09104	1	1.00936	1	0.95616	1	0.958632	1	1.01194	1	3	1871.01	-1.16651
aEVAAAAAAPPEAGTEEPk	Q8RYZ1;A2WXH7	N-Term(iTRAQ8plex); K19(iTRAQ8plex)	88.62													2	2388.28	-2.90525
aEVADVSEAVR	Q69WE5	N-Term(iTRAQ8plex)	22.31	0.82554	2	0.862034	2	1.0154	2	1.11284	2	1.10533	2	1.17603	2	2	1449.78	-3.14263
aEVDAAVEALk	Q6ZD35	N-Term(iTRAQ8plex); K11(iTRAQ8plex)	24.62	0.905006	1	0.727173	1	0.825012	1	0.896063	1	1.04208	1	0.896057	1	3	1724.01	2.81353
aEVSTIGTIQHVNLIR	A2WXT2	N-Term(iTRAQ8plex)	32.73	1.07653	15	1.3129	15	1.21446	15	1.06199	15	0.994721	15	1.05973	15	3	2055.18	-2.08168
aEVSTIGTIQHVNLVR	Q6ZF83	N-Term(iTRAQ8plex)	12.84	1.12638	11	1.37977	11	1.17655	11	1.12427	11	1.05219	11	1.02593	11	3	2041.17	-0.738135
aEVVTNHILk	A3BXL8	N-Term(iTRAQ8plex); K10(iTRAQ8plex)	17.45	0.915535	1	0.93219	1	0.859398	1	0.813567	1	0.7387	1	0.857354	1	4	1732.05	-2.32075
aEVVYAESk	A2YI72	N-Term(iTRAQ8plex); K9(iTRAQ8plex)	49.45	0.989615	20	0.936614	20	0.912782	20	0.933801	20	0.929086	20	0.864229	20	2	1603.91	-3.01475
aEVYVGDEAGQEk	A2ZLP6	N-Term(iTRAQ8plex); K13(iTRAQ8plex)	30.67	0.919989	1	0.930849	1	0.918424	1	0.950061	1	0.986892	1	0.964002	1	4	2003.05	-2.12368
aEYDESGPAIVHR	A2ZID5	N-Term(iTRAQ8plex)	52.44	1.03752	2	1.29335	2	1.02327	2	1.16528	2	0.901606	2	1.14434	2	3	1747.89	-3.18027
aEYDESGPGIVHMk	P0C542	N-Term(iTRAQ8plex); K14(iTRAQ8plex)	55.49	1.11765	6	1.25825	6	1.10732	6	0.850525	6	0.757345	6	0.778062	6	3	2141.11	-2.48215
aEYDESGPSIVHR	A2XLF2	N-Term(iTRAQ8plex)	76.07	1.05187	7	1.21966	7	1.15733	7	1.01608	7	0.90455	7	1.01207	7	3	1763.88	-3.72603
aEYEESGPAIVHR	P0C539	N-Term(iTRAQ8plex)	56.89	1.14956	3	1.3233	3	1.28991	3	1.06899	3	0.975821	3	1.0665	3	3	1761.9	-1.61028
aEYPIFDk	Q0JB49;Q6ESJ0	N-Term(iTRAQ8plex); K8(iTRAQ8plex)	29.53													2	1590.89	-3.86926
aEYPVFQk	Q10L56	N-Term(iTRAQ8plex); K8(iTRAQ8plex)	29	1.03257	20	1.03321	20	0.964634	20	1.02029	20	1.03009	20	0.954242	20	2	1589.91	-0.409583
aFADEMGIPFMETSAk	Q6H8G2;Q0JQ62	N-Term(iTRAQ8plex); K16(iTRAQ8plex)	42.99													4	2353.2	-2.54173
aFAEVAAk	Q8S718	N-Term(iTRAQ8plex); K8(iTRAQ8plex)	30	1.13908	3	1.08384	3	1.05308	3	1.00887	3	0.838283	3	1.02094	3	2	1414.85	-1.26821
aFAGGQAAAYk	A2ZS26	N-Term(iTRAQ8plex); K11(iTRAQ8plex)	54.7	0.952666	2	0.980356	2	0.932591	2	1.05978	2	1.08338	2	0.997575	2	3	1662.94	-4.27885
aFAGSPIVGEIR	Q01K11	N-Term(iTRAQ8plex)	34.01	1.00916	2	1.01118	2	1.04164	2	1.10319	2	1.14936	2	1.14206	2	3	1520.87	-1.97094
aFASDFAAk	A2Z490	N-Term(iTRAQ8plex); K9(iTRAQ8plex)	16.6	0.93598	2	0.86608	2	0.851354	2	0.984982	2	1.05287	2	0.995843	2	2	1535.86	-8.0183
aFcAVSPk	Q7XLP7	N-Term(iTRAQ8plex); C3(Carbamidomethyl); K8(iTRAQ8plex)	17.76	0.962127	1	1.02177	1	0.860382	1	0.909173	1	0.930768	1	0.898096	1	2	1487.84	-6.1817
aFcDIDAk	A3BP16	N-Term(iTRAQ8plex); C3(Carbamidomethyl); K8(iTRAQ8plex)	18.51	0.956016	1	0.884778	1	0.875787	1	0.92729	1	1.00858	1	0.946162	1	2	1547.83	-5.39575
aFDAGDAEFcGIk	B8AP14	N-Term(iTRAQ8plex); C10(Carbamidomethyl); K13(iTRAQ8plex)	55.9	0.927492	2	0.867129	2	0.86834	2	0.95729	2	1.05642	2	0.933401	2	3	2009.02	-1.38866
aFDGLPLENk	C7J1A3	N-Term(iTRAQ8plex); K10(iTRAQ8plex)	20.03	0.912289	1	0.971225	1	0.939168	1	0.957916	1	0.990672	1	0.952128	1	3	1711.98	-3.64258
aFDGVPPPYDR	Q7F225	N-Term(iTRAQ8plex)	32.03	0.925442	3	0.963417	3	0.948075	3	1.00277	3	1.01996	3	1.06608	3	2	1537.79	-2.58418
aFDLGGHQIAR	Q9SDK4;A2ZLM3	N-Term(iTRAQ8plex)	60.32													3	1488.82	-2.04166
aFDLLHEGGcLR	A2XAZ3	N-Term(iTRAQ8plex); C10(Carbamidomethyl)	14.64	0.917785	7	0.952023	7	0.958308	7	1.01746	7	0.978708	7	0.971121	7	3	1691.88	-0.358926
aFEEAEk	Q7XE16;Q10RP0	N-Term(iTRAQ8plex); K7(iTRAQ8plex)	27.11													2	1431.79	-3.57968
aFEGIVPLk	Q6K8R0	N-Term(iTRAQ8plex); K9(iTRAQ8plex)	18.21	1.02653	1	0.878223	1	0.896478	1	0.904803	1	0.928146	1	0.927085	1	3	1581.98	-1.70724
aFEPILLAGR	A2ZB00	N-Term(iTRAQ8plex)	21.89	0.933668	50	0.975509	50	1.00209	50	1.1124	50	1.11411	50	1.08611	50	2	1390.83	-2.49072
aFFDSTGSLWEk	B9G5W2;B8BH17	N-Term(iTRAQ8plex); K12(iTRAQ8plex)	4.65													3	1996.06	-0.738133
aFGDEEk	Q5TKJ2;Q8RYZ1;A2WXH7	N-Term(iTRAQ8plex); K7(iTRAQ8plex)	24.06													2	1403.76	-2.31114
aFGDEEkR	Q5TKJ2;Q8RYZ1;A2WXH7	N-Term(iTRAQ8plex); K7(iTRAQ8plex)	6.15													3	1559.86	-3.09605
aFGTQVAEPLR	Q7XR93	N-Term(iTRAQ8plex)	29.87	0.956346	3	1.03611	3	1.06204	3	1.02478	3	1.05278	3	1.04213	3	2	1492.84	-0.323333
aFHDPQLDAR	Q8H852	N-Term(iTRAQ8plex)	37.83	0.962115	3	1.04787	3	1.01104	3	0.998919	3	0.93585	3	1.05321	3	3	1473.77	-1.4703
aFLADLTENDPR	A2ZN77	N-Term(iTRAQ8plex)	60.88	1.13856	31	1.23871	31	1.25068	31	0.985011	31	1.03609	31	1.06486	31	2	1665.87	-3.63607
aFLAGTPHER	Q6L569	N-Term(iTRAQ8plex)	28.32	1.03205	10	1.07343	10	1.04414	10	0.996803	10	0.991493	10	1.03765	10	2	1402.77	-2.88569
aFLDEWETNPSVk	B8B475	N-Term(iTRAQ8plex); K13(iTRAQ8plex)	36.85	1.0055	1	0.771715	1	0.912925	1	0.754856	1	0.789976	1	0.834507	1	2	2144.14	-6.24211
aFLLYGPPGTGk	A2WKH8	N-Term(iTRAQ8plex); K12(iTRAQ8plex)	43.55	1.02305	1	0.96355	1	1.00215	1	0.969838	1	0.961661	1	0.929352	1	3	1829.07	-2.3704
aFLPEGADR	Q8H5P5;Q5Z4C9	N-Term(iTRAQ8plex)	12.8													2	1279.69	-2.83787
aFLVEEQk	Q6Z537	N-Term(iTRAQ8plex); K8(iTRAQ8plex)	35.21	1.19913	4	1.25414	4	1.14272	4	1.25861	4	0.994431	4	1.03159	4	2	1571.92	-3.57268
aFMDATGGLWR	Q6ZKI0	N-Term(iTRAQ8plex)	16.87	0.979729	35	0.930768	35	0.960443	35	0.955785	35	0.99522	35	0.997577	35	2	1528.78	-5.71084
aFMTMAGEIk	P40392	N-Term(iTRAQ8plex); K10(iTRAQ8plex)	46.19	0.951128	16	0.865422	16	0.892747	16	0.975676	16	1.01571	16	0.929489	16	3	1706.94	-4.1742
aFNPVYVYR	A2Z436	N-Term(iTRAQ8plex)	19.82	1.12799	2	1.13286	2	1.27102	2	0.917937	2	0.808512	2	0.966552	2	2	1432.79	0.218413
aFQATDQFLQIAk	B8ABB7	N-Term(iTRAQ8plex); K13(iTRAQ8plex)	7.68	0.977688	3	0.897974	3	0.964546	3	0.961498	3	1.04134	3	0.8872	3	3	2089.19	-0.828353
aFQSAYFNR	Q8H5N9	N-Term(iTRAQ8plex)	26.89	0.967275	118	0.997816	118	0.94932	118	1.04876	118	1.04005	118	0.995364	118	2	1407.73	-1.67312
aFQSAyFNR	Q8H5N9	N-Term(iTRAQ8plex); Y6(iTRAQ8plex)	11.54	0.931615	149	1.01638	149	0.850024	149	1.16765	149	1.24956	149	1.10866	149	3	1711.93	-3.86576
aFQTILk	Q852B4	N-Term(iTRAQ8plex); K7(iTRAQ8plex)	18.97	0.923174	1	0.861286	1	0.852815	1	0.95562	1	1.00822	1	0.900412	1	2	1428.9	-2.8061
aFQTVLTEIYR	Q75LE2	N-Term(iTRAQ8plex)	32.9	0.983419	26	0.887134	26	0.895982	26	0.960602	26	1.09083	26	0.988938	26	3	1644.93	0.681499
aFQYFDk	P53683	N-Term(iTRAQ8plex); K7(iTRAQ8plex)	21.53	0.935595	2	0.908942	2	0.871369	2	1.04898	2	1.0627	2	0.995788	2	2	1526.84	-4.38428
aFSEVAAER	Q6YUH7	N-Term(iTRAQ8plex)	17.13	1.10517	1	0.984629	1	1.04435	1	0.912806	1	0.916552	1	0.889176	1	2	1283.68	-4.18914
aFSGLGGLGVDEPAMVSALAk	B7E4J4	N-Term(iTRAQ8plex); K21(iTRAQ8plex)	72	1.02095	31	0.959694	31	0.995393	31	1.01653	31	0.976433	31	0.964355	31	3	2598.44	-1.64711
aFSIIDQDk	Q7F0J0	N-Term(iTRAQ8plex); K9(iTRAQ8plex)	7.01	0.922024	1	1.05641	1	1.05358	1	1.3532	1	1.23912	1	1.15266	1	2	1644.92	-10.4036
aFSLEELk		N-Term(iTRAQ8plex); K8(iTRAQ8plex)	11.39													2	1544.91	-1.47861
aFTEQQVSDEMMk	B8ALL8	N-Term(iTRAQ8plex); K13(iTRAQ8plex)	59.17	0.481164	1	0.459954	1	0.443294	1	1.5459	1	1.48805	1	1.49333	1	3	2152.08	-3.01266
aFTPTNLPGLk	Q94LY4	N-Term(iTRAQ8plex); K11(iTRAQ8plex)	33.37	0.896145	1	0.998461	1	0.90668	1	0.781769	1	0.814681	1	0.788691	1	2	1767.06	-1.43016
aFVDGSFPYGLR	Q6I612	N-Term(iTRAQ8plex)	11.15	0.927651	5	0.865605	5	0.981014	5	0.992168	5	1.04996	5	1.0508	5	3	1632.87	-1.32895
aFVDSGAQSTIISk	A2X229	N-Term(iTRAQ8plex); K14(iTRAQ8plex)	66.89	1.00554	2	0.962019	2	0.958755	2	0.956917	2	0.984076	2	0.917808	2	2	2032.15	-1.75743
aFVEDSIMSk	Q5Z4C9	N-Term(iTRAQ8plex); K10(iTRAQ8plex)	51.31	0.887363	6	0.868292	6	0.894361	6	1.05409	6	1.12176	6	1.01716	6	2	1734.95	-4.04352
aFVEHYYR	Q9XJ54	N-Term(iTRAQ8plex)	20.76	0.988079	19	0.995217	19	0.944703	19	0.978327	19	1.01718	19	0.972775	19	3	1388.72	-2.18834
aFVPPQHFIR	Q6Z5P1;Q654U5	N-Term(iTRAQ8plex)	17.56													4	1515.87	-2.01406
aFVSEYAVTGNDAGR	Q10M78	N-Term(iTRAQ8plex)	59.82	1.04078	2	1.09172	2	1.09982	2	1.1513	2	1.15441	2	1.21368	2	2	1860.94	2.09227
aFVSGLVSHLR	B9FB92	N-Term(iTRAQ8plex)	31.05	0.98954	14	1.04075	14	0.979977	14	0.945437	14	0.814015	14	0.89213	14	3	1489.88	-1.04814
aFVVHELEDDLGk	A2YY59	N-Term(iTRAQ8plex); K13(iTRAQ8plex)	7.42	0.9611	1	0.97007	1	0.91389	1	1.10394	1	0.75495	1	0.905732	1	3	2080.15	-3.07787
aFVVVGDNNGHVGLGVk	Q84M35	N-Term(iTRAQ8plex); K17(iTRAQ8plex)	5.36	1.15911	2	1.15433	2	0.865468	2	1.19574	2	1.12893	2	1.22191	2	4	2290.3	-4.45718
aFYEEEVR	Q8RU33	N-Term(iTRAQ8plex)	4.57	0.92504	3	1.01738	3	0.906676	3	1.05222	3	1.10448	3	1.06102	3	2	1346.69	-1.10455
aGAADGAGGGGEDIVEAGAEAPPPQR	Q2R351	N-Term(iTRAQ8plex)	68.73	0.800856	1	1.0457	1	1.0044	1	0.926182	1	0.834837	1	2.02783	1	3	2624.28	-2.59524
aGAADTEASTESDNR	A2Z057	N-Term(iTRAQ8plex)	49.17	1.26317	2	1.47006	2	1.07401	2	0.87598	2	0.834785	2	1.00607	2	3	1798.83	-3.21994
aGAcSTcAGk	A2XT72	N-Term(iTRAQ8plex); C4(Carbamidomethyl); C7(Carbamidomethyl); K10(iTRAQ8plex)	10.73	0.741408	1	1.03794	1	0.870864	1	1.05965	1	0.979885	1	1.00192	1	3	1590.82	-1.28405
aGAEGLPHGGR	B8BCQ7	N-Term(iTRAQ8plex)	10.92	1.70616	1	2.46424	1	1.80789	1	1.07592	1	0.855792	1	1.21341	1	3	1325.72	-2.03278
aGAEVIGISGDDAASHk	P0C5D4	N-Term(iTRAQ8plex); K17(iTRAQ8plex)	74.84	1.09555	1	1.18793	1	0.967025	1	1.11437	1	1.01428	1	0.967645	1	3	2206.19	-1.28817
aGAGAGASPGWPQR	Q6ZKL8	N-Term(iTRAQ8plex)	55.43	1.04262	4	1.07682	4	1.09458	4	0.930656	4	0.898996	4	0.932772	4	2	1586.83	-2.99843
aGAITDTVDPR	Q0JBH7	N-Term(iTRAQ8plex)	30.95	1.10428	3	1.15576	3	1.4841	3	1.04256	3	1.10047	3	1.22903	3	3	1419.77	-2.35105
aGANVVLTTk	B8ASU6	N-Term(iTRAQ8plex); K10(iTRAQ8plex)	44.97	0.988514	2	1.15005	2	0.816948	2	0.779617	2	0.820812	2	0.773584	2	2	1581.97	-5.17005
aGASQDQILNETR	Q53PH6	N-Term(iTRAQ8plex)	70.5	0.971151	2	1.16912	2	1.19126	2	0.977614	2	0.9227	2	0.962873	2	2	1706.89	-1.50931
aGASVDLR	Q9FW37	N-Term(iTRAQ8plex)	30.99	0.926413	1	1.24711	1	1.08876	1	0.901224	1	0.965664	1	1.06951	1	3	1092.63	-2.09242
aGAYDLVEk	A2YLB1	N-Term(iTRAQ8plex); K9(iTRAQ8plex)	31.77	1.01953	1	1.10152	1	0.931842	1	0.907484	1	0.933829	1	0.996072	1	2	1573.9	-1.09389
aGAYVWk	B8A6V4	N-Term(iTRAQ8plex); K7(iTRAQ8plex)	28.34	0.981889	2	0.877174	2	0.926133	2	1.0322	2	1.02517	2	0.98954	2	2	1402.82	-4.21498
aGcAAVLLSNR	Q10QV8	N-Term(iTRAQ8plex); C3(Carbamidomethyl)	14.38	0.833303	1	0.822703	1	0.870829	1	1.17172	1	1.21002	1	1.15032	1	2	1435.8	-0.313119
aGcYAANVIIQR	Q6K1R5	N-Term(iTRAQ8plex); C3(Carbamidomethyl)	40.13	1.31228	3	1.23129	3	1.49733	3	1.06591	3	0.937564	3	1.21126	3	3	1639.89	0.371586
aGDAAAIPPASR	B9FLS8	N-Term(iTRAQ8plex)	26.32	1.66202	1	1.8746	1	1.9414	1	1.2291	1	1.08352	1	1.71619	1	3	1400.78	-1.83675
aGDGDGGGGTEEPQPELR	Q69XK9	N-Term(iTRAQ8plex)	51.09	1.12733	2	1.03973	2	1.36058	2	0.971155	2	0.99266	2	0.910484	2	3	2045.97	-0.936379
aGDPVLHDEFPGR	B8B0V0	N-Term(iTRAQ8plex)	46.42	1.20532	2	1.55307	2	1.25333	2	1.05742	2	0.81634	2	1.02208	2	3	1713.89	0.512177
aGDQIVFk	B8BAL8	N-Term(iTRAQ8plex); K8(iTRAQ8plex)	22.64	0.956386	1	0.910209	1	0.856328	1	1.0404	1	1.04796	1	0.952485	1	2	1485.89	-1.12585
aGDSTPEELATATQVQGDYMPITR	Q9LWS2	N-Term(iTRAQ8plex)	46.81	0.763495	1	0.850542	1	1.04093	1	1.04789	1	1.19596	1	1.08239	1	3	2855.39	-3.38212
aGDSTPEELATATQVQGDyMPITR	Q9LWS2	N-Term(iTRAQ8plex); Y19(iTRAQ8plex)	27.45	1.00615	1	1.04039	1	1.06518	1	0.983701	1	0.900611	1	0.868979	1	4	3159.59	-6.22144
aGDTLDAIAR	B8BE47	N-Term(iTRAQ8plex)	35.4	0.833047	6	0.865601	6	0.900365	6	1.1792	6	1.16837	6	1.15044	6	2	1306.72	-4.87076
aGEDADSLGLTGHER	Q6YZX6	N-Term(iTRAQ8plex)	80.97	1.11354	5	1.18122	5	1.06432	5	0.872414	5	0.862524	5	0.940678	5	3	1831.91	0.308774
aGEDDDDLDDEDAEDEDk	B9FWE4	N-Term(iTRAQ8plex); K18(iTRAQ8plex)	54.47	0.880042	1	0.801603	1	0.997249	1	1.11661	1	1.52374	1	1.32069	1	3	2619.1	-5.80885
aGEDNYSLAVR	Q9FTY4	N-Term(iTRAQ8plex)	35.27	0.974137	7	0.98106	7	0.984247	7	0.937181	7	0.986688	7	0.968152	7	2	1498.78	-2.1378
aGEDYDGGR	Q75M08;Q942L2	N-Term(iTRAQ8plex)	18.84													2	1243.58	-2.79063
aGEFFYSAQR	Q10P12;B8BG04	N-Term(iTRAQ8plex)	26.11													2	1479.75	-1.02899
aGELTPEELER	Q8H588	N-Term(iTRAQ8plex)	47.27	0.99198	9	0.921947	9	0.943943	9	1.02142	9	1.07497	9	1.06221	9	2	1547.82	-1.86325
aGESPAAALR	Q7XLP7	N-Term(iTRAQ8plex)	15.72	1.11002	2	1.05159	2	1.06284	2	1.04938	2	1.03298	2	1.08837	2	2	1246.7	-3.13746
aGETFVIPR	Q851K0	N-Term(iTRAQ8plex)	29.92	1.39974	1	1.41765	1	1.94213	1	1.36724	1	1.04068	1	1.68188	1	3	1293.75	0.133047
aGEVLFGR	Q945W2	N-Term(iTRAQ8plex)	13.62	1.07504	1	0.990057	1	0.972467	1	0.730959	1	0.742297	1	0.722949	1	2	1152.67	-0.526928
aGFAGDDAPR	A2XNS1;P0C539;Q65XH8;Q67G20;A2XLF2;A2ZID5;Q75HX0;P0C542	N-Term(iTRAQ8plex)	25.65													2	1280.65	-5.89198
aGFDPSTSSLEIR	Q2QMK8	N-Term(iTRAQ8plex)	15.77	1.11065	2	1.16853	2	1.29402	2	1.04836	2	1.08487	2	1.07091	2	3	1683.88	-5.05559
aGFPAPAYQDDR	Q8H6G8	N-Term(iTRAQ8plex)	43.5	1.02682	4	0.965452	4	1.33095	4	0.893225	4	0.804845	4	0.880018	4	2	1611.8	-1.65311
aGFPAPAyQDDR	Q8H6G8	N-Term(iTRAQ8plex); Y8(iTRAQ8plex)	8.41	1.06881	1	1.0275	1	0.921857	1	0.935925	1	0.869552	1	0.901717	1	3	1916.01	-3.51981
aGFPSTQVAVk	A2YFW7	N-Term(iTRAQ8plex); K11(iTRAQ8plex)	8.98	1.14323	1	1.13624	1	1.02613	1	0.974536	1	0.984289	1	0.966008	1	3	1713.02	1.26855
aGGAAPSNPWR	Q6AVV6	N-Term(iTRAQ8plex)	25.43	1.00497	3	1.08701	3	1.05295	3	1.05288	3	1.11623	3	1.05785	3	2	1387.73	-2.71994
aGGAAVAVDGESLR	Q5WMP3	N-Term(iTRAQ8plex)	39.17	1.11773	2	1.40352	2	1.27742	2	1.03237	2	1.1047	2	1.16583	2	2	1576.85	-3.11847
aGGAMTADEVER	B8AZX2	N-Term(iTRAQ8plex)	34.07	0.962239	1	0.962913	1	0.941294	1	0.885654	1	1.02941	1	0.9549	1	2	1510.74	-3.39979
aGGAVVSTGAGk	Q7EZD7	N-Term(iTRAQ8plex); K12(iTRAQ8plex)	52.38	0.958259	5	0.930412	5	0.818291	5	0.829051	5	0.750216	5	0.825394	5	2	1582.93	-4.94674
aGGAYTMNTASAVTVR	Q5QM99	N-Term(iTRAQ8plex)	27.06	1.00364	1	1.46661	1	1.26049	1	0.882808	1	0.907087	1	1.07246	1	3	1873.97	-1.07583
aGGELHDVVDEAIQDR	Q6H5Y1	N-Term(iTRAQ8plex)	56.51	1.05818	19	1.11189	19	1.07966	19	0.979337	19	0.989227	19	0.971743	19	3	2028.02	-3.25967
aGGFGGGGGEAIAGR	Q69NC3	N-Term(iTRAQ8plex)	58.67	0.931985	3	0.956799	3	0.977419	3	0.919436	3	1.00208	3	1.06615	3	3	1537.8	-1.83023
aGGFIHmGR	B8AIW8	N-Term(iTRAQ8plex); M7(Oxidation)	6.73	1.06155	1	1.41535	1	1.39228	1	1.06804	1	1.04727	1	1.27945	1	3	1265.67	-5.70994
aGGGVAVAAGR	B8B117	N-Term(iTRAQ8plex)	13.34	1.19011	1	2.09648	1	2.01335	1	1.09916	1	0.975208	1	1.61232	1	3	1189.69	-2.68631
aGGQLNVLSTLDQAk	Q8H6H4	N-Term(iTRAQ8plex); K15(iTRAQ8plex)	80.8	0.936115	7	0.909143	7	0.980687	7	0.880985	7	0.95166	7	0.874794	7	2	2123.22	-1.6175
aGGVDDAPLVGNk	Q6ER94	N-Term(iTRAQ8plex); K13(iTRAQ8plex)	36.4	0.788838	2	0.769142	2	0.743025	2	1.21793	2	1.13221	2	1.09836	2	2	1821.03	-1.23457
aGGVSDGGAAHGASGR	Q10HX0	N-Term(iTRAQ8plex)	70.87	1.12784	1	1.29117	1	1.15334	1	1.0675	1	0.978342	1	1.10417	1	3	1630.82	-1.07362
aGGVVPGIk	Q69V57	N-Term(iTRAQ8plex); K9(iTRAQ8plex)	23.03	1.19004	2	1.63332	2	1.13542	2	1.24517	2	0.910959	2	1.02665	2	3	1405.9	-0.625934
aGGYIQMGR	Q67UP9	N-Term(iTRAQ8plex)	10.91	1.01463	1	0.959275	1	1.00334	1	0.902627	1	0.941852	1	0.938415	1	2	1256.66	-6.14557
aGHQTSAESWGTGR	Q7Y1I5;Q6ZLB8	N-Term(iTRAQ8plex)	22.18													3	1748.86	-2.97324
aGHYNTFVR	Q6Z0V9	N-Term(iTRAQ8plex)	24.81	0.928953	3	1.12354	3	1.06408	3	1.06072	3	1.01556	3	1.10385	3	3	1368.73	-2.48453
aGIALNDNFVk	Q7FAH2;Q0J8A4	N-Term(iTRAQ8plex); K11(iTRAQ8plex)	68.82													2	1770.03	-1.37726
aGIALSDTFVk	Q6K5G8	N-Term(iTRAQ8plex); K11(iTRAQ8plex)	14.78	0.943847	25	0.827352	25	0.856803	25	0.942463	25	1.00434	25	0.945188	25	3	1730.03	-0.684417
aGILSIWk	A2YQL4	N-Term(iTRAQ8plex); K8(iTRAQ8plex)	25.11	0.977424	54	0.96849	54	0.899439	54	1.04393	54	1.16507	54	0.879213	54	2	1495.94	-5.51879
aGIQEVHFLPFNPTDk	Q8L6I2;Q8L6I1;Q8L6I3	N-Term(iTRAQ8plex); K16(iTRAQ8plex)	27.51													4	2421.33	-3.10318
aGIVALIk	Q0JNM8	N-Term(iTRAQ8plex); K8(iTRAQ8plex)	34.96	0.919493	1	0.816219	1	0.825513	1	0.905828	1	0.89194	1	0.834393	1	3	1392.93	-5.13946
aGIVDLIk	B8ANG4	N-Term(iTRAQ8plex); K8(iTRAQ8plex)	33.83	0.897095	1	0.728353	1	0.711559	1	0.870908	1	0.898828	1	0.865763	1	3	1436.93	-1.93974
aGIVIEEk	B9ETC3	N-Term(iTRAQ8plex); K8(iTRAQ8plex)	35.13	0.878321	2	0.87283	2	0.844698	2	1.04379	2	1.12644	2	1.00406	2	2	1466.9	-3.34578
aGIVLEDk	Q75IC7	N-Term(iTRAQ8plex); K8(iTRAQ8plex)	33.49	0.940214	3	0.90268	3	0.88629	3	1.05969	3	1.10894	3	1.03028	3	2	1452.88	-5.12526
aGkPAAAAEPk	Q6YY64	N-Term(iTRAQ8plex); K3(iTRAQ8plex); K11(iTRAQ8plex)	31.75	0.688158	1	1.00553	1	1.05281	1	1.58454	1	1.25619	1	1.39777	1	2	1923.18	-1.55904
aGLcGGPAQVEEDR	E3SC17	N-Term(iTRAQ8plex); C4(Carbamidomethyl)	18.8	1.01587	1	1.06592	1	0.955184	1	0.727599	1	0.983747	1	1.09951	1	2	1762.87	-2.31962
aGLFEVk	Q5Z6U5	N-Term(iTRAQ8plex); K7(iTRAQ8plex)	19.36	0.954284	1	0.909213	1	0.838365	1	0.990488	1	1.0142	1	1.01466	1	2	1371.84	-7.38753
aGLLAALR	Q6Z6K0	N-Term(iTRAQ8plex)	53.79	0.758098	1	0.638034	1	0.670608	1	0.760685	1	0.567315	1	0.65126	1	3	1088.71	-3.67857
aGLQFPVGR	A2YVE5;B8AXA2;Q84MP7	N-Term(iTRAQ8plex)	20.55													2	1248.73	-2.94983
aGLQQQQQQQPGTPGR	I3RJI6	N-Term(iTRAQ8plex)	77.46	1.09417	2	1.44335	2	1.20954	2	1.01119	2	0.856225	2	0.799083	2	3	2026.07	-1.37883
aGLSQPAPEA	A2Y9X7	N-Term(iTRAQ8plex)	36.95	1.14499	2	1.49815	2	1.55389	2	1.11119	2	1.17194	2	1.72432	2	2	1244.67	-3.70327
aGLVLQGDAR	Q6ZLA9	N-Term(iTRAQ8plex)	27.46	0.699737	1	0.681931	1	0.698056	1	1.4065	1	1.51045	1	1.42168	1	2	1303.76	-0.276206
aGLVNALk	B8B2R4	N-Term(iTRAQ8plex); K8(iTRAQ8plex)	7.27	0.906621	1	0.906983	1	0.807222	1	0.939896	1	0.893939	1	0.903219	1	2	1393.89	-8.67145
aGMALSDEQk	A3AGN3	N-Term(iTRAQ8plex); K10(iTRAQ8plex)	44.18	0.949598	1	0.901797	1	0.851778	1	1.00631	1	1.02442	1	0.914535	1	2	1657.9	-2.72009
aGMSVAR	Q2QXR8;Q2RAK2	N-Term(iTRAQ8plex)	23.63													3	995.56	-1.47494
aGMTHIVR	P35684	N-Term(iTRAQ8plex)	21.23	1.06932	5	1.40018	5	1.23214	5	1.08522	5	0.907684	5	1.1422	5	3	1188.68	-0.686914
aGMVPLQMELGGk	Q6Z9G0	N-Term(iTRAQ8plex); K13(iTRAQ8plex)	70.49	1.03875	9	0.965347	9	0.949929	9	0.87896	9	0.876771	9	0.83597	9	2	1939.09	-1.24155
aGmVPLQMELGGk	Q6Z9G0	N-Term(iTRAQ8plex); M3(Oxidation); K13(iTRAQ8plex)	22.39	1.1499	1	1.37514	1	0.908111	1	0.877878	1	0.885747	1	0.910621	1	2	1955.09	-2.93866
aGNcLYALGR	B9F767	N-Term(iTRAQ8plex); C4(Carbamidomethyl)	31.64	0.947458	2	0.91733	2	0.926671	2	0.939355	2	1.02656	2	0.983868	2	2	1398.75	1.28209
aGNEQFVTETSk	B8B8E2	N-Term(iTRAQ8plex); K12(iTRAQ8plex)	52.94	0.906784	1	0.8535	1	0.830589	1	1.04921	1	0.983285	1	1.02596	1	3	1919.02	-7.38257
aGNLGDSVTVTR	A6N0Q9	N-Term(iTRAQ8plex)	53.72	0.975237	5	1.1053	5	1.01051	5	1.09794	5	1.07768	5	1.00291	5	3	1493.82	-2.21799
aGNLGESVTVSR	Q762A6	N-Term(iTRAQ8plex)	43.43	0.925587	6	1.1582	6	1.17961	6	1.13241	6	1.2738	6	1.31502	6	2	1493.82	-4.33364
aGNTLDDVR	Q6Z0Z1	N-Term(iTRAQ8plex)	11.73	1.10123	1	1.01634	1	1.12578	1	0.969633	1	1.01327	1	0.989001	1	2	1264.68	-3.32458
aGPAPEANAELQANLDQR	B9EWS0	N-Term(iTRAQ8plex)	32.79	0.948745	1	0.951406	1	1.35615	1	0.98398	1	1.13118	1	1.24633	1	3	2169.12	-2.2644
aGPASTGGDGGGLPWER	A2Z9M8	N-Term(iTRAQ8plex)	41.47	0.884299	1	0.866733	1	1.084	1	1.26388	1	1.23516	1	1.32092	1	2	1888.95	2.53775
aGQFNTLIR	Q7F800	N-Term(iTRAQ8plex)	11.12	0.92679	5	0.941785	5	0.91758	5	1.01234	5	1.00088	5	0.968704	5	2	1323.77	2.53741
aGQGAFGNMcR	Q7Y1I5;Q6ZLB8	N-Term(iTRAQ8plex); C10(Carbamidomethyl)	35.72													2	1472.7	-2.50582
aGQQAGSLSDFYENcR	Q0DG77	N-Term(iTRAQ8plex); C15(Carbamidomethyl)	61.69	0.86285	1	0.882866	1	0.900987	1	0.9503	1	0.721275	1	0.907083	1	2	2106.98	-1.93578
aGQSVVLR	Q6K669	N-Term(iTRAQ8plex)	13.15	1.09325	2	1.09139	2	1.15836	2	0.879754	2	0.956381	2	0.990704	2	2	1133.69	-2.84168
aGSAAEELLR	B8B0Z9	N-Term(iTRAQ8plex)	12.72	1.06368	1	1.01062	1	1.19567	1	0.96044	1	0.891851	1	0.959381	1	2	1320.74	-1.69551
aGScSScAGk	B8B9Y9	N-Term(iTRAQ8plex); C4(Carbamidomethyl); C7(Carbamidomethyl); K10(iTRAQ8plex)	33.46	1.20305	2	1.32831	2	1.29266	2	1.25177	2	0.998143	2	1.23146	2	3	1592.8	-1.09836
aGSGAYADVYR	A2YCH5	N-Term(iTRAQ8plex)	19.41	1.08004	1	1.13494	1	1.03371	1	0.930544	1	0.836503	1	0.965257	1	3	1433.73	-3.46371
aGSSDEFTR	B8AJN4	N-Term(iTRAQ8plex)	12.58	1.03605	1	1.13589	1	0.88461	1	1.03068	1	0.827392	1	0.899145	1	2	1273.63	-3.64629
aGTLAAVVGMVGSGk	Q8GU64	N-Term(iTRAQ8plex); K15(iTRAQ8plex)	0.45	1.01176	1	0.898549	1	0.960251	1	0.91624	1	0.993446	1	1.02604	1	3	1926.13	1.8233
aGTYDEk	Q94JA2	N-Term(iTRAQ8plex); K7(iTRAQ8plex)	18.98	0.626758	2	0.614225	2	0.577116	2	1.05255	2	1.04464	2	0.947294	2	2	1391.76	-3.19379
aGVAEIIR		N-Term(iTRAQ8plex)	5.72													2	1132.7	-2.73576
aGVALTQSYLVGR	Q84KJ7	N-Term(iTRAQ8plex)	15.05	1.14974	1	1.02292	1	1.20145	1	0.986777	1	1.0312	1	1.0784	1	2	1638.94	-1.96436
aGVDALHAVR	A2YZ05	N-Term(iTRAQ8plex)	12.62	0.940473	1	1.03665	1	1.00372	1	1.06855	1	1.04224	1	1.12306	1	3	1312.76	-0.140737
aGVDDALGR	Q7XII4	N-Term(iTRAQ8plex)	23.29	1.25064	1	1.20564	1	1.26447	1	0.830303	1	0.846008	1	0.772959	1	2	1177.64	-3.02009
aGVLAGIk	Q75L87	N-Term(iTRAQ8plex); K8(iTRAQ8plex)	42.04	1.04183	5	0.711283	5	0.727467	5	0.93895	5	0.866689	5	0.975441	5	2	1336.87	-4.12874
aGVLQEIk	Q6YUV4	N-Term(iTRAQ8plex); K8(iTRAQ8plex)	12.1	0.885895	2	0.922262	2	0.947374	2	1.08418	2	1.0293	2	0.96801	2	2	1465.91	-4.08983
aGVLRGImTSIYk	B8BMS0	N-Term(iTRAQ8plex); M8(Oxidation); K13(iTRAQ8plex)	1.77	0.986776	6	1.1945	6	0.932149	6	1.0223	6	1.05597	6	1.05893	6	3	2033.21	3.35388
aGVQELYMGR	B8ABF6	N-Term(iTRAQ8plex)	22.06	1.02406	3	1.15193	3	1.11791	3	1.03295	3	0.962348	3	1.04907	3	2	1427.76	-1.01398
aGWEEEAR	Q5W6F1	N-Term(iTRAQ8plex)	5.74	1.0124	1	0.988603	1	0.984738	1	0.895065	1	0.85592	1	0.817384	1	2	1251.62	-5.19185
aGWGVMASHR	Q5VNT9	N-Term(iTRAQ8plex)	15.77	1.22758	2	1.38307	2	1.35713	2	1.0586	2	1.00534	2	1.18759	2	3	1375.72	1.94842
aGWGVMTSHR	Q42971;B8AK24	N-Term(iTRAQ8plex)	26.41													2	1405.73	1.91574
aGWGVmTSHR	Q42971;B8AK24	N-Term(iTRAQ8plex); M6(Oxidation)	12.12													3	1421.73	2.0484
aGYESLLk	Q6Z6L4	N-Term(iTRAQ8plex); K8(iTRAQ8plex)	26.97	1.0005	4	0.933395	4	0.914702	4	0.970975	4	0.987598	4	0.939323	4	2	1488.88	-5.88978
aGYNELNQMAEEAk	Q8L6I1	N-Term(iTRAQ8plex); K14(iTRAQ8plex)	91.49	0.9376	12	0.854588	12	0.858888	12	1.01608	12	1.06346	12	0.985547	12	2	2176.11	-2.68736
aGYNELNQmAEEAk	Q8L6I1	N-Term(iTRAQ8plex); M9(Oxidation); K14(iTRAQ8plex)	52.49	0.972572	1	0.697712	1	0.683985	1	1.31453	1	1.32898	1	1.30543	1	2	2192.11	-2.13003
aHADLQAR	Q0DW19	N-Term(iTRAQ8plex)	6.64	0.925088	1	1.00921	1	0.812643	1	0.726832	1	0.752076	1	0.830143	1	3	1185.66	-2.55076
aHASTEGVTk	A2Y650;Q6H6C7	N-Term(iTRAQ8plex); K10(iTRAQ8plex)	34.46													2	1608.91	-3.04094
aHAVLLAPPLVLAAVSR	Q5NB88	N-Term(iTRAQ8plex)	12.85	1.10121	1	1.03634	1	0.963578	1	1.13452	1	1.025	1	0.970766	1	3	2002.25	0.222202
aHDMDINcVR	Q6YVM7	N-Term(iTRAQ8plex); C8(Carbamidomethyl)	27.98	0.954393	1	1.01503	1	0.964052	1	0.95323	1	0.94935	1	0.975188	1	3	1534.74	-3.38524
aHEcVmDGFER	Q60EX6;B9FA13	N-Term(iTRAQ8plex); C4(Carbamidomethyl); M6(Oxidation)	14.69													3	1670.75	-3.0017
aHEcVMDGFER	Q60EX6;B9FA13	N-Term(iTRAQ8plex); C4(Carbamidomethyl)	20.4													3	1654.76	-2.85782
aHFETETTR	Q0JEI2	N-Term(iTRAQ8plex)	35.19	1.33343	2	1.77737	2	1.56963	2	0.978936	2	0.86551	2	1.07363	2	3	1395.71	-1.57226
aHFTAPSSVR	Q2QXN5	N-Term(iTRAQ8plex)	9.99	0.91856	2	1.048	2	0.820273	2	1.04922	2	0.980691	2	0.977455	2	3	1376.75	-5.58453
aHGAVPQPGSVVIAR	Q6K6B9	N-Term(iTRAQ8plex)	5.39	1.27869	1	1.49795	1	1.36398	1	1.15901	1	0.932539	1	0.996628	1	3	1763.03	1.50742
aHGEAAR	Q5WMP3	N-Term(iTRAQ8plex)	0.68	1.21606	1	1.2028	1	0.935439	1	0.743429	1	0.946388	1	1.12927	1	3	1015.56	-2.07629
aHLPAPAEDIQILR	Q5N760	N-Term(iTRAQ8plex)	34.31	0.982612	2	1.0465	2	1.05862	2	1.04975	2	1.00467	2	1.12888	2	3	1848.06	-0.656736
aHNAELk	B9GBA5;B9FVM6;B9GD70	N-Term(iTRAQ8plex); K7(iTRAQ8plex)	14.22													4	1390.82	-4.36445
aHPGGPASSEFDWGTGDTPR	Q0ILV0	N-Term(iTRAQ8plex)	29.34	0.797496	1	1.14304	1	1.08899	1	0.883337	1	0.893594	1	0.863407	1	3	2346.1	-3.07048
aHSAVVLk	Q654U5	N-Term(iTRAQ8plex); K8(iTRAQ8plex)	35.14	0.951525	2	1.05599	2	0.969887	2	1.04251	2	1.03174	2	1.02534	2	2	1432.9	-5.21605
aHSEAck	Q656J2	N-Term(iTRAQ8plex); C6(Carbamidomethyl); K7(iTRAQ8plex)	11.57	0.997497	4	1.07273	4	0.957393	4	0.845481	4	0.958426	4	0.93115	4	3	1410.76	-2.46518
aHVAAAVAGcSR	Q10NB4	N-Term(iTRAQ8plex); C10(Carbamidomethyl)	17.27	1.13777	2	1.26758	2	1.18774	2	1.00896	2	1.03315	2	1.11173	2	2	1473.79	-1.7277
aHVELSR	A2X381	N-Term(iTRAQ8plex)	10.96	1.34197	1	2.02983	1	1.63278	1	1.34182	1	0.84201	1	1.11185	1	3	1115.64	-3.99975
aHVEPDQIVSWLk	K4FHN8	N-Term(iTRAQ8plex); K13(iTRAQ8plex)	28.72	0.985597	20	1.0489	20	0.931105	20	1.05677	20	1.05495	20	1.0076	20	4	2130.21	-1.99331
aIALTVDTPR	B8AKX6;B8B7C5	N-Term(iTRAQ8plex)	15.16													2	1360.81	-1.14634
aIAMEAQSESk	A2Y963	N-Term(iTRAQ8plex); K11(iTRAQ8plex)	43.34	0.941506	2	0.921666	2	1.06209	2	1.10384	2	1.16128	2	1.08411	2	2	1772.96	-2.11664
aIANEcQANFISVk	Q7XE16;Q10RP0	N-Term(iTRAQ8plex); C6(Carbamidomethyl); K14(iTRAQ8plex)	55.47													2	2173.18	-2.51505
aIAPPPSESAGGR	Q5ZCK5	N-Term(iTRAQ8plex)	35.48	1.25588	2	1.3451	2	1.51105	2	1.03246	2	0.990951	2	0.950069	2	3	1513.83	0.530462
aIcDDDVVLETTAPk	Q10L71	N-Term(iTRAQ8plex); C3(Carbamidomethyl); K15(iTRAQ8plex)	71	0.952333	1	0.735362	1	0.879161	1	0.824871	1	1.02562	1	0.906194	1	2	2255.2	-0.479016
aIcIVHNETATGVTNDLSAVR	A6N1A8	N-Term(iTRAQ8plex); C3(Carbamidomethyl)	57.6	0.986331	5	1.10805	5	1.17077	5	1.09393	5	0.959575	5	1.03712	5	3	2545.33	-2.24438
aIcTGEk	A3BFA0;Q75M32;Q40674	N-Term(iTRAQ8plex); C3(Carbamidomethyl); K7(iTRAQ8plex)	23.46													2	1386.78	-4.02627
aIDAELGAATAk	B9EXE9	N-Term(iTRAQ8plex); K12(iTRAQ8plex)	66.89	0.900282	1	0.892836	1	0.957691	1	0.861451	1	0.91813	1	0.817589	1	2	1739.02	-0.171765
aIDDHDAAAITR	Q6YYV8	N-Term(iTRAQ8plex)	40.51	0.87712	3	1.29187	3	1.1605	3	1.31563	3	1.17626	3	1.23607	3	3	1572.82	-2.70244
aIDDWLPITSSR	Q85V22	N-Term(iTRAQ8plex)	29.61	0.976887	61	1.0357	61	1.05689	61	1.02874	61	1.06704	61	1.02203	61	2	1677.91	-1.502
aIDETTGIVVVk		N-Term(iTRAQ8plex); K12(iTRAQ8plex)	5.68													3	1853.12	-2.91774
aIDHQQVEESLR	B9FCH2	N-Term(iTRAQ8plex)	35.1	1.06564	4	1.3547	4	1.19735	4	0.988555	4	0.922066	4	0.960218	4	3	1728.92	-0.849723
aIDLIDEAGSR	Q2QVG9	N-Term(iTRAQ8plex)	24.71	0.827729	1	0.821095	1	0.841451	1	1.08084	1	1.1034	1	1.03685	1	2	1463.8	-3.71337
aIDVTSLR	Q8GU51	N-Term(iTRAQ8plex)	0.72	0.925114	1	0.889992	1	0.985664	1	0.885709	1	0.902314	1	1.00109	1	2	1178.7	-3.74853
aIEAAPQQPEAAPAGDDDGGk	Q10LJ8	N-Term(iTRAQ8plex); K21(iTRAQ8plex)	58.74	0.969661	1	0.987986	1	1.08245	1	1.07479	1	0.962287	1	1.04914	1	3	2616.34	-0.316842
aIEAVPDLk	B9FFP1	N-Term(iTRAQ8plex); K9(iTRAQ8plex)	39.26	0.904826	3	0.799327	3	0.790522	3	1.00954	3	1.06099	3	0.96665	3	2	1563.95	-2.14625
aIEEAPPVIk	B8APL1	N-Term(iTRAQ8plex); K10(iTRAQ8plex)	12.15	1.10883	1	0.948596	1	0.907041	1	1.00737	1	0.944649	1	0.933997	1	2	1675.02	-2.33163
aIELAEAR	Q0JD43	N-Term(iTRAQ8plex)	18.61	1.07656	1	1.04224	1	1.02945	1	0.848298	1	0.882302	1	0.836717	1	2	1176.69	-0.733712
aIELDPSMHk	Q0JL44	N-Term(iTRAQ8plex); K10(iTRAQ8plex)	15.24	1.01555	1	1.07401	1	1.02133	1	1.00376	1	0.866065	1	0.946259	1	3	1748.98	-1.55507
aIELLSGk	Q8S0T6	N-Term(iTRAQ8plex); K8(iTRAQ8plex)	18.92	0.922305	1	0.896322	1	0.798539	1	1.00411	1	1.12981	1	0.992809	1	3	1438.91	-1.41516
aIEVSSNEYEPSEk	A2Y8G4;A2ZCG1	N-Term(iTRAQ8plex); K14(iTRAQ8plex)	51.68													3	2190.14	-0.281562
aIEVVPDLk	Q6YY64	N-Term(iTRAQ8plex); K9(iTRAQ8plex)	33.55	0.833009	6	0.7452	6	0.74607	6	1.00341	6	1.04555	6	0.952173	6	2	1591.98	-2.98333
aIFTIPSALTMTk	Q657L8	N-Term(iTRAQ8plex); K13(iTRAQ8plex)	15.41	1.01494	24	0.975294	24	0.941844	24	0.858709	24	0.934443	24	0.873446	24	3	2002.18	-2.22566
aIGDPILFR	B9F2B8	N-Term(iTRAQ8plex)	19.08	0.982245	3	1.06312	3	1.18866	3	1.03998	3	1.05264	3	1.15921	3	2	1305.78	-0.288553
aIGEVVSTEAR	Q7X6F6	N-Term(iTRAQ8plex)	20.39	0.917795	1	0.85679	1	0.882654	1	0.975465	1	1.07616	1	1.0259	1	2	1435.82	7.7244
aIGGLHGPLYR	A2WR67	N-Term(iTRAQ8plex)	36.51	1.06719	1	1.22263	1	1.09256	1	1.06335	1	0.908018	1	0.866168	1	3	1457.85	-1.40239
aIGSGSEGADSSLQEQYNk	Q9LSU1	N-Term(iTRAQ8plex); K19(iTRAQ8plex)	70.32	0.757587	1	0.904339	1	0.870734	1	0.977984	1	0.970355	1	0.769326	1	2	2549.29	-0.960971
aIGVEINk	Q9AV87;Q10RZ3	N-Term(iTRAQ8plex); K8(iTRAQ8plex)	37.76													2	1451.9	-4.19617
aIGVSNFSSk	B8AC38;Q60EL7	N-Term(iTRAQ8plex); K10(iTRAQ8plex)	43.59													2	1617.94	0.762452
aIGVSNFTTk	A3AU96	N-Term(iTRAQ8plex); K10(iTRAQ8plex)	2.28	0.916589	1	0.976932	1	0.890688	1	0.988595	1	0.852325	1	1.05954	1	4	1645.97	-1.07716
aIHNAEk	B8BCN9	N-Term(iTRAQ8plex); K7(iTRAQ8plex)	27.54	0.691507	1	0.726335	1	0.729797	1	0.740589	1	0.902473	1	0.776798	1	2	1390.82	-3.11635
aIIDVLGR	Q6ASU8	N-Term(iTRAQ8plex)	10.7	0.908568	2	0.868097	2	0.894481	2	0.927147	2	0.985691	2	0.980913	2	2	1160.73	-2.39726
aIIVQPER	B9F7T1	N-Term(iTRAQ8plex)	23.05	0.972813	2	1.02571	2	1.08862	2	0.996682	2	1.00194	2	1.04025	2	2	1229.75	-0.65466
aILDAHPVLR	B8A708	N-Term(iTRAQ8plex)	5.07	1.2316	1	1.48272	1	1.27162	1	1.03386	1	0.738976	1	0.843409	1	3	1408.85	-2.64201
aILEGGSDDEGASTEAHGR	Q6ASU8	N-Term(iTRAQ8plex)	100.35	1.33259	1	1.61051	1	1.15331	1	1.38859	1	0.930253	1	0.922873	1	3	2176.04	-2.19927
aILENPNDITk	Q5N760	N-Term(iTRAQ8plex); K11(iTRAQ8plex)	45.56	0.963568	2	0.893538	2	0.924711	2	0.947881	2	0.979797	2	0.859526	2	2	1836.07	1.49092
aILFVPk	A2Z2G1	N-Term(iTRAQ8plex); K7(iTRAQ8plex)	29.37	0.954026	2	0.911499	2	0.958528	2	0.923978	2	0.928525	2	0.897921	2	2	1395.92	-1.84984
aILMNATDk	Q6ZL37	N-Term(iTRAQ8plex); K9(iTRAQ8plex)	19.25	0.997763	1	0.868388	1	0.833978	1	0.962716	1	1.00287	1	0.972471	1	2	1584.92	-4.60448
aINEcNLALDASPR	Q0IZQ4	N-Term(iTRAQ8plex); C5(Carbamidomethyl)	33.98	1.01138	2	1.13879	2	1.43243	2	1.09674	2	0.995404	2	1.06783	2	3	1847.96	0.109414
aINETHELk	B8AWG8	N-Term(iTRAQ8plex); K9(iTRAQ8plex)	47.71	0.876958	4	0.890785	4	0.817354	4	1.11421	4	1.1154	4	1.06952	4	3	1662.96	-4.42671
aINLVHTR	Q6H590	N-Term(iTRAQ8plex)	1.16	1.03561	1	1.1698	1	1.11187	1	1.09256	1	1.01063	1	1.12439	1	3	1227.75	-1.20949
aINPLmTPDITS	Q69X22	N-Term(iTRAQ8plex); M6(Oxidation)	54.61	1.03086	1	0.996862	1	1.03105	1	1.00424	1	1.03144	1	1.05273	1	2	1592.85	-2.14626
aINPLMTPDITS	Q69X22	N-Term(iTRAQ8plex)	30.58	0.982124	1	1.12692	1	1.22205	1	1.07026	1	0.915166	1	1.0399	1	2	1576.85	-3.68971
aINQILQPIR	Q6Z0P0	N-Term(iTRAQ8plex)	26.15	1.06407	1	1.04324	1	1.10342	1	1.00767	1	1.19029	1	1.02018	1	3	1469.91	-0.971826
aIPGYGGGMSSAk	Q6Z0I4	N-Term(iTRAQ8plex); K13(iTRAQ8plex)	10.75	0.887246	1	0.829812	1	0.8625	1	0.93765	1	0.968637	1	0.906005	1	3	1803.98	-7.00073
aIPNQQIIGk	F1DK64	N-Term(iTRAQ8plex); K10(iTRAQ8plex)	31.51	0.926734	2	0.857595	2	0.843187	2	1.0073	2	1.043	2	0.984098	2	3	1690.05	-0.67255
aIPVASTPGDAGADNLk	B8B8I2	N-Term(iTRAQ8plex); K17(iTRAQ8plex)	20.76	1.0011	1	1.23921	1	1.26384	1	0.981784	1	0.949775	1	1.02655	1	3	2205.24	1.42261
aISELIPHEIANIEk	Q5Z402	N-Term(iTRAQ8plex); K15(iTRAQ8plex)	33.11	0.997351	17	1.06189	17	1.02303	17	1.11611	17	1.11159	17	1.08566	17	3	2285.33	-2.72749
aISPDVSVR	B8BCQ7	N-Term(iTRAQ8plex)	30.33	1.31439	1	1.71063	1	1.8013	1	1.04588	1	0.956057	1	1.36643	1	3	1247.72	-1.46143
aISTSNAYDDQFk	Q5JK10	N-Term(iTRAQ8plex); K13(iTRAQ8plex)	59.55	0.824054	2	0.720207	2	0.740223	2	1.15627	2	1.14705	2	1.11752	2	2	2068.08	1.1238
aITHTFk	B9EU15	N-Term(iTRAQ8plex); K7(iTRAQ8plex)	5.34	1.00878	1	1.1023	1	1.10808	1	1.01107	1	0.99723	1	1.00306	1	3	1425.87	-0.817896
aITPIIEk	B8AHN8	N-Term(iTRAQ8plex); K8(iTRAQ8plex)	11.63	1.01015	1	0.9097	1	1.04731	1	0.848778	1	0.844488	1	0.808941	1	2	1492.95	-1.91618
aITSAYYR	Q40723;Q852B4;Q94J09;Q75M17;Q8RZ83;Q75LE2;P40393;A2Y6J2;Q6AUF8;Q941S7	N-Term(iTRAQ8plex)	19.89													2	1248.69	-3.10335
aITVDTQAVQR	B8AEF0	N-Term(iTRAQ8plex)	33.97	1.12135	1	1.41398	1	1.69655	1	1.19933	1	1.07119	1	1.19721	1	3	1505.86	1.36451
aIVAATDAEAGGSR	Q7XK44	N-Term(iTRAQ8plex)	35.85	1.02572	1	1.07924	1	0.958746	1	0.907117	1	1.00282	1	0.882937	1	2	1592.85	-2.19071
aIVDSGGAR	Q33B25	N-Term(iTRAQ8plex)	20.59	0.944287	1	0.935021	1	0.903846	1	0.80766	1	0.84268	1	0.890212	1	2	1149.65	-3.47751
aIVLcQVEk	Q6Z5P1;Q654U5	N-Term(iTRAQ8plex); C5(Carbamidomethyl); K9(iTRAQ8plex)	23.09													3	1667.99	-3.21687
aIVLTGAGGk	B8AFN7	N-Term(iTRAQ8plex); K10(iTRAQ8plex)	17.24	0.878458	1	0.883057	1	0.988693	1	1.06394	1	1.06604	1	1.08683	1	2	1494.94	-4.30271
aIVQEDHGVAPPR	Q0J8M9	N-Term(iTRAQ8plex)	47.03	1.21445	5	1.40425	5	1.1993	5	1.30029	5	1.05806	5	1.04858	5	3	1692.93	-3.7226
aIVSVGQTDLLANk	B8BGU2	N-Term(iTRAQ8plex); K14(iTRAQ8plex)	53.5	1.03221	2	0.945771	2	1.01909	2	0.91449	2	0.996828	2	0.883008	2	3	2037.21	-2.81453
aIYGDDVEk	H2KX19	N-Term(iTRAQ8plex); K9(iTRAQ8plex)	47.08	0.776113	2	0.72244	2	0.732698	2	1.07014	2	1.1556	2	0.983617	2	2	1617.88	-7.60477
akDEAVGVAAAAER	Q6K4P5	N-Term(iTRAQ8plex); K2(iTRAQ8plex)	29.22	1.05966	3	0.948305	3	0.858898	3	0.982754	3	0.889863	3	0.904627	3	3	1966.11	-5.30811
akDIEASAPEGGEFSAk	A2X7G8	N-Term(iTRAQ8plex); K2(iTRAQ8plex); K17(iTRAQ8plex)	10.32	1.13594	2	1.42898	2	1.27933	2	1.11457	2	0.941945	2	1.03445	2	5	2619.43	-2.96417
akEEGYDVEk	C6YXK7	N-Term(iTRAQ8plex); K2(iTRAQ8plex); K10(iTRAQ8plex)	6.75	0.846856	1	0.729327	1	0.68865	1	0.90856	1	0.974829	1	0.856397	1	3	2080.16	-2.12358
akEEGYDVSk	Q6Z9F9	N-Term(iTRAQ8plex); K2(iTRAQ8plex); K10(iTRAQ8plex)	9.16	0.814441	2	0.784575	2	0.722838	2	1.11792	2	1.14807	2	1.05372	2	3	2038.16	-1.02404
akPDEDVPLNLDTF	Q9ST27	N-Term(iTRAQ8plex); K2(iTRAQ8plex)	6.3	1.04809	1	0.845245	1	0.908534	1	0.964299	1	0.93545	1	0.910544	1	3	2182.18	-3.78348
aLAADAVAGk	Q0DQ28	N-Term(iTRAQ8plex); K10(iTRAQ8plex)	47.32	0.977136	2	0.996962	2	1.04404	2	1.0028	2	1.02702	2	1.02918	2	2	1494.9	-4.79073
aLAADEAGAGAGAVR	Q75LE2	N-Term(iTRAQ8plex)	93.46	1.00425	3	1.22955	3	1.27493	3	0.99355	3	1.0302	3	1.15038	3	3	1603.87	-2.18953
aLAADHDASASAVSR	C7IZL4	N-Term(iTRAQ8plex)	20.61	1.35236	1	2.05549	1	1.49856	1	1.49367	1	0.766214	1	0.973237	1	3	1745.9	-2.73306
aLAASSLPDDAEVR	A2WSL7	N-Term(iTRAQ8plex)	24.03	0.935309	1	1.05783	1	1.08856	1	0.94805	1	0.974343	1	1.17816	1	2	1718.92	-0.660247
aLADEIGIPFLETSAk	P40392	N-Term(iTRAQ8plex); K16(iTRAQ8plex)	64.54	0.911425	39	0.857693	39	0.86585	39	1.06249	39	1.08302	39	1.03179	39	2	2283.3	-0.953401
aLADPNVDVR	Q6ASU8	N-Term(iTRAQ8plex)	25.04	1.1136	1	1.55599	1	1.554	1	1.03267	1	1.16534	1	1.34275	1	3	1373.77	-1.52856
aLAIPNDQLLk	Q01LG8	N-Term(iTRAQ8plex); K11(iTRAQ8plex)	5.38	1.0229	1	0.581895	1	0.64095	1	0.856773	1	0.93877	1	0.868176	1	2	1804.11	-3.85638
aLAIVEk	Q7XMK5	N-Term(iTRAQ8plex); K7(iTRAQ8plex)	16.28	1.01823	29	1.07442	29	1.02008	29	1.07873	29	0.939951	29	0.909629	29	2	1351.87	-2.02548
aLALAEIEk	Q5VQW9	N-Term(iTRAQ8plex); K9(iTRAQ8plex)	23.13	0.940788	2	0.790605	2	0.760926	2	0.778598	2	0.869661	2	0.777305	2	2	1565.97	-4.0303
aLALPAIcR	Q6AVM8	N-Term(iTRAQ8plex); C8(Carbamidomethyl)	21.91	0.898732	6	0.859966	6	0.904539	6	1.0341	6	1.07188	6	1.01725	6	2	1288.77	-1.63153
aLANAGLESSR	Q6K3Z3	N-Term(iTRAQ8plex)	5.83	0.954027	2	0.805745	2	0.860898	2	0.894056	2	0.955482	2	0.917533	2	2	1392.77	-4.07007
aLANAGLIEPESHR	Q69IM6	N-Term(iTRAQ8plex)	10.66	1.22869	2	1.45733	2	1.30526	2	1.10399	2	0.968057	2	1.21583	2	3	1781.98	-1.38521
aLASEQDASAR	A2WNI6	N-Term(iTRAQ8plex)	35.68													2	1422.75	-2.73873
aLATAPIIPVAVEk	A2YYM7	N-Term(iTRAQ8plex); K14(iTRAQ8plex)	45	0.887625	2	0.760902	2	0.835687	2	0.980384	2	0.965609	2	0.857143	2	2	2001.25	-3.90269
aLAVASPR	Q94D81	N-Term(iTRAQ8plex)	19.82	0.953458	2	1.1124	2	1.03257	2	1.08725	2	1.1605	2	1.14913	2	2	1088.67	-3.4301
aLcAEHNVHLVTVPSAk	B8B7B6;Q8H2J8	N-Term(iTRAQ8plex); C3(Carbamidomethyl); K17(iTRAQ8plex)	16.61													4	2454.37	-2.43654
aLcEAVLDSIIGEHGVSPAAk	A2XNF0	N-Term(iTRAQ8plex); C3(Carbamidomethyl); K21(iTRAQ8plex)	55.41	1.07997	35	1.0852	35	1.03997	35	0.899699	35	0.909264	35	0.924188	35	4	2745.5	-2.97997
aLDAmLQDHAYR	A2ZHH3	N-Term(iTRAQ8plex); M5(Oxidation)	50.16	1.31488	3	1.62147	3	1.44459	3	1.13419	3	0.880335	3	1.04919	3	3	1723.87	-2.37845
aLDAMLQDHAYR	A2ZHH3	N-Term(iTRAQ8plex)	26.46	1.11404	3	1.23143	3	1.11943	3	1.1592	3	0.965252	3	0.988169	3	3	1707.88	-1.91157
aLDDSGYSk	Q6YY47	N-Term(iTRAQ8plex); K9(iTRAQ8plex)	39.32	0.978009	7	0.982557	7	0.874859	7	1.05308	7	0.996333	7	0.97798	7	2	1563.84	-5.39342
aLDEYASFR	A3AX85	N-Term(iTRAQ8plex)	19.11	0.937531	1	0.903347	1	0.910127	1	0.992862	1	0.975871	1	0.948966	1	2	1375.71	-2.01273
aLDIGDDPAAPPk	Q6AUF8	N-Term(iTRAQ8plex); K13(iTRAQ8plex)	49.14	0.893296	1	0.81477	1	0.784647	1	1.08649	1	1.10829	1	1.04328	1	2	1888.06	-2.14156
aLDLAAAGk	Q01N35	N-Term(iTRAQ8plex); K9(iTRAQ8plex)	44.38	0.907063	3	0.863671	3	0.831769	3	0.910289	3	0.970442	3	0.859433	3	2	1437.89	-1.59486
aLDLLYGMcDVTNAk	B9FAE7	N-Term(iTRAQ8plex); C9(Carbamidomethyl); K15(iTRAQ8plex)	16.35	1.06736	1	1.07873	1	1.04278	1	0.998762	1	1.14481	1	1.08609	1	3	2292.2	-6.26182
aLDLVPTk	B9EUU5	N-Term(iTRAQ8plex); K8(iTRAQ8plex)	17.98	1.0344	1	1.06102	1	1.11758	1	1.02689	1	1.02815	1	1.07183	1	2	1464.92	-2.58535
aLDMNTAEDEIVR	Q20IJ5	N-Term(iTRAQ8plex)	27.01	1.25067	2	1.25187	2	1.33842	2	0.743657	2	0.721893	2	0.725	2	2	1780.9	-0.554115
aLDTESVDSVk	Q0D9G9	N-Term(iTRAQ8plex); K11(iTRAQ8plex)	63.66	0.885727	3	0.827181	3	0.815903	3	1.10111	3	1.05074	3	0.958335	3	2	1771.98	-5.0332
aLEAIQHLk	Q10L71	N-Term(iTRAQ8plex); K9(iTRAQ8plex)	20.36	0.964413	34	0.971792	34	0.953362	34	0.984602	34	0.983536	34	0.917075	34	3	1631.01	0.581958
aLEEGGSSYNNIk	Q9FU69	N-Term(iTRAQ8plex); K13(iTRAQ8plex)	8.61	1.13099	1	1.21481	1	1.30415	1	0.727689	1	1.32312	1	3.23494	1	2	1990.06	-7.08192
aLEETEQGLk	H2KW09	N-Term(iTRAQ8plex); K10(iTRAQ8plex)	21.37	1.02312	1	0.997166	1	1.23079	1	1.19438	1	1.56392	1	1.54473	1	2	1725.98	-3.76048
aLEETmPEkmDAGk		N-Term(iTRAQ8plex); M6(Oxidation); K9(iTRAQ8plex); M10(Oxidation); K14(iTRAQ8plex)	0.48													3	2494.33	-1.75631
aLEGVAPVVNIR	Q5Z4C9	N-Term(iTRAQ8plex)	38.84	1.11274	3	1.00252	3	1.34585	3	1.26672	3	1.22457	3	1.13666	3	3	1541.93	-0.749162
aLEIAEk	Q5KQH5;B8ABA7	N-Term(iTRAQ8plex); K7(iTRAQ8plex)	14.27													2	1381.85	-1.93583
aLEIDPDNR	Q7F1F2;B8AI01	N-Term(iTRAQ8plex)	19.41													2	1346.71	-6.38513
aLENAFNSLEGITcNk	Q338N8	N-Term(iTRAQ8plex); C14(Carbamidomethyl); K16(iTRAQ8plex)	50.66	1.02761	10	0.935371	10	0.946285	10	1.02646	10	1.01438	10	0.965419	10	3	2389.26	-3.02736
aLENEMLLR	A2YA91	N-Term(iTRAQ8plex)	6.63	1.04713	22	1.01694	22	1.10107	22	0.972592	22	0.957	22	0.950328	22	2	1392.78	-2.45919
aLENLMANPAIk	Q6ZI53	N-Term(iTRAQ8plex); K12(iTRAQ8plex)	41.72	0.9114	4	0.763239	4	0.889954	4	0.933264	4	1.08047	4	0.944975	4	2	1893.11	0.634749
aLEQLDAAVAk	B8AWM4	N-Term(iTRAQ8plex); K11(iTRAQ8plex)	25.64	0.77243	1	0.773183	1	0.719719	1	1.07754	1	0.975876	1	0.88024	1	2	1737.04	1.457
aLESFYEk	Q651T8	N-Term(iTRAQ8plex); K8(iTRAQ8plex)	29	0.94001	55	0.875868	55	0.879729	55	0.969468	55	0.991989	55	0.924701	55	2	1594.89	-4.34197
aLESPLSPIVILATNR	B7FAF4	N-Term(iTRAQ8plex)	21.63	1.03012	2	1.02246	2	1.23017	2	1.0442	2	1.13696	2	1.06446	2	3	1998.18	-4.17602
aLEVIHGR	A2YMN1	N-Term(iTRAQ8plex)	31.35	0.977524	2	1.20833	2	1.15929	2	0.997722	2	0.945573	2	0.970924	2	3	1198.72	-2.36754
aLEVVQYLk	B8B0Z9;Q6Z3N3	N-Term(iTRAQ8plex); K9(iTRAQ8plex)	6.63													3	1671.03	-1.50163
aLEWPLR	Q0ITI9	N-Term(iTRAQ8plex)	4.63	0.984042	1	0.92979	1	0.944682	1	0.974691	1	0.987438	1	0.998646	1	2	1188.7	-1.64313
aLEYADFDk	B8ABA7	N-Term(iTRAQ8plex); K9(iTRAQ8plex)	22.78	1.04605	6	1.05285	6	0.987822	6	0.948476	6	0.945488	6	0.91967	6	2	1679.91	-0.145045
aLFANHSAGGGPHMAADGLR	Q6Z3Y9	N-Term(iTRAQ8plex)	50.11	1.04659	104	1.13266	104	1.0207	104	1.04754	104	0.988555	104	1.00433	104	4	2254.14	-1.49628
aLFANHSAGGGPHmAADGLR	Q6Z3Y9	N-Term(iTRAQ8plex); M14(Oxidation)	27.76	1.04565	72	1.19159	72	1.06168	72	1.09137	72	1.0112	72	1.04239	72	4	2270.14	0.431584
aLFGIEk	B9FCI1	N-Term(iTRAQ8plex); K7(iTRAQ8plex)	19.4	1.01625	4	0.945868	4	0.919011	4	0.926204	4	0.94978	4	0.880895	4	3	1385.86	-0.470065
aLFVQADGVk	Q84ZC0	N-Term(iTRAQ8plex); K10(iTRAQ8plex)	59.11	0.919062	3	0.850815	3	0.835817	3	1.00725	3	1.04401	3	0.938823	3	2	1655.99	-1.4218
aLGALSSLIR	A2XNH4	N-Term(iTRAQ8plex)	6.84	1.04329	1	0.932385	1	0.97143	1	0.919556	1	0.898742	1	0.892904	1	2	1304.82	2.04958
aLGAPLGPGEVR	Q0DJV6	N-Term(iTRAQ8plex)	65.47	0.982435	4	1.19316	4	1.10615	4	1.06709	4	0.985985	4	1.15999	4	3	1440.84	-3.05789
aLGcSLGVAANR	Q6ZFM7	N-Term(iTRAQ8plex); C4(Carbamidomethyl)	46.56	1.30987	5	1.25292	5	1.27388	5	0.852088	5	0.885668	5	0.864542	5	3	1492.82	-0.566295
aLGDYLGVk	P35683	N-Term(iTRAQ8plex); K9(iTRAQ8plex)	46.29	0.947467	7	0.658763	7	0.657212	7	0.711592	7	0.711976	7	0.673131	7	2	1543.93	-1.94668
aLGHIELDLPEAPEk	B9EVI1	N-Term(iTRAQ8plex); K15(iTRAQ8plex)	20.93	1.04769	4	1.04835	4	1.02299	4	1.08339	4	1.00645	4	1.08819	4	4	2240.27	-0.72728
aLGLLGcDDESIDk	Q33B25	N-Term(iTRAQ8plex); C7(Carbamidomethyl); K14(iTRAQ8plex)	35.99	0.897387	1	0.748353	1	0.830926	1	0.959994	1	0.881457	1	0.709156	1	2	2114.13	3.35785
aLGLPDAck	Q8H567	N-Term(iTRAQ8plex); C8(Carbamidomethyl); K9(iTRAQ8plex)	18.21	0.924269	1	0.807321	1	0.806496	1	1.02195	1	1.12415	1	0.991476	1	4	1552.9	3.28252
aLGLWTIk	A2YNC3	N-Term(iTRAQ8plex); K8(iTRAQ8plex)	17.62	0.944432	1	0.774701	1	0.79564	1	0.950047	1	0.976706	1	0.929914	1	3	1509.96	-3.18898
aLGQISEk	Q7XDC8	N-Term(iTRAQ8plex); K8(iTRAQ8plex)	21.31	1.04822	3	0.970108	3	0.944974	3	0.848999	3	0.837238	3	0.804416	3	2	1453.88	-5.0383
aLGSATYSPANPAR	B8BPD0	N-Term(iTRAQ8plex)	20.31	1.21788	2	1.31057	2	1.51949	2	1.11522	2	1.07172	2	1.28342	2	2	1679.9	-1.94305
aLGSIGAGTTPGR	A3A2Y2	N-Term(iTRAQ8plex)	16.74	1.16566	2	1.22858	2	1.29764	2	1.07685	2	1.21227	2	1.15056	2	2	1461.84	1.88497
aLGSTPGVYR	C8TEV8	N-Term(iTRAQ8plex)	22.31	1.2037	2	1.11079	2	1.16997	2	0.946283	2	1.00394	2	1.03566	2	3	1324.75	1.23443
aLGTQVAEPLR	Q337C1	N-Term(iTRAQ8plex)	22.42	1.04766	1	1.26726	1	1.05361	1	1.09057	1	1.00692	1	1.01756	1	2	1458.85	-3.19297
aLGVAAk		N-Term(iTRAQ8plex); K7(iTRAQ8plex)	18.14													3	1237.81	-1.0927
aLGWSTGDPcSSPR	P93425	N-Term(iTRAQ8plex); C10(Carbamidomethyl)	26.34	0.903749	1	0.909411	1	0.783372	1	1.24968	1	1.15181	1	1.09461	1	2	1794.87	-2.6546
aLHGGNFQGTPIGVSMDNAR	P14717	N-Term(iTRAQ8plex)	40.76	1.06067	8	1.18031	8	1.10065	8	1.04777	8	1.02288	8	0.997721	8	3	2346.18	-4.5697
aLHGGNFQGTPIGVSmDNAR	P14717	N-Term(iTRAQ8plex); M16(Oxidation)	37	1.26714	2	1.51028	2	1.20828	2	1.18039	2	0.765771	2	0.781747	2	3	2362.18	-1.63676
aLHGGNFQGTPIGVSmDNTR	Q2QPR0;Q84VE0;A2X7F5	N-Term(iTRAQ8plex); M16(Oxidation)	43.7													3	2392.19	-3.1985
aLHGGNFQGTPIGVSMDNTR	Q2QPR0;Q84VE0;A2X7F5	N-Term(iTRAQ8plex)	42.35													3	2376.2	-0.47965
aLHLFR	Q656J2	N-Term(iTRAQ8plex)	20.42	0.910221	3	0.737428	3	0.669337	3	0.80047	3	0.846017	3	0.807946	3	3	1060.66	-1.31059
aLHLGVNVk	Q7XPY2	N-Term(iTRAQ8plex); K9(iTRAQ8plex)	30.53	0.989402	274	1.06386	274	0.911656	274	1.04962	274	1.01844	274	0.974566	274	3	1558.98	-3.33777
aLHLPAAcGADASAFSk	Q6ASY2	N-Term(iTRAQ8plex); C8(Carbamidomethyl); K17(iTRAQ8plex)	90.91	0.927709	142	0.893192	142	0.849223	142	1.08678	142	1.07346	142	1.02277	142	3	2295.24	-0.789609
aLHPDTFYR	A2YI72	N-Term(iTRAQ8plex)	26.44	1.01257	130	1.05055	130	1.0208	130	0.980371	130	0.982324	130	0.970391	130	4	1423.76	-1.10812
aLHPQcTPDGAcAPATR	A2Y3B9	N-Term(iTRAQ8plex); C6(Carbamidomethyl); C12(Carbamidomethyl)	35.23	1.16979	1	1.88106	1	1.13915	1	1.00067	1	0.849795	1	1.009	1	3	2127.03	-4.16333
aLIAAEYSGVk	Q9ZRI7	N-Term(iTRAQ8plex); K11(iTRAQ8plex)	50.84	0.953179	4	0.879941	4	0.846147	4	0.89424	4	0.903769	4	0.829255	4	3	1730.03	-0.678637
aLIAAEYTGVk	Q5Z627	N-Term(iTRAQ8plex); K11(iTRAQ8plex)	48.68	0.908409	2	0.873923	2	0.83582	2	0.997561	2	0.969577	2	0.948692	2	2	1744.04	-1.79969
aLILSTLR	Q0DSY0	N-Term(iTRAQ8plex)	5.25	0.928094	3	0.954682	3	0.976051	3	1.08106	3	1.06556	3	1.06226	3	2	1190.78	-1.77628
aLIVSEVEk	B8AEF1	N-Term(iTRAQ8plex); K9(iTRAQ8plex)	24.65	1.11561	1	0.999364	1	1.05934	1	0.75374	1	0.824388	1	0.678668	1	2	1595.98	-0.704424
aLLDGISGEAR	A2XZS5	N-Term(iTRAQ8plex)	26.21	1.13792	1	1.12244	1	1.30808	1	1.20956	1	1.01101	1	1.21626	1	3	1405.79	-3.95065
aLLDVGLIR	B7SDE4;A3A0I1	N-Term(iTRAQ8plex)	37.39													3	1273.81	-4.10697
aLLEVVESGGk	A2YXU2;A2Z3I9	N-Term(iTRAQ8plex); K11(iTRAQ8plex)	33.42													2	1710.02	-4.78099
aLLFVPPk	Q0D9G9	N-Term(iTRAQ8plex); K8(iTRAQ8plex)	16.36	0.890718	3	0.883034	3	0.84405	3	0.984763	3	0.975506	3	0.982333	3	2	1492.97	-2.24403
aLLLAGPPATGk	B7FAF4	N-Term(iTRAQ8plex); K12(iTRAQ8plex)	39.18	0.993193	1	0.953066	1	0.945983	1	0.821472	1	0.883393	1	0.81306	1	3	1717.09	1.15191
aLLLDPTGR	Q2QX92	N-Term(iTRAQ8plex)	6.65	0.962779	4	0.945483	4	1.00245	4	0.961225	4	0.971984	4	1.01093	4	2	1259.76	-0.0178838
aLLLHk		N-Term(iTRAQ8plex); K6(iTRAQ8plex)	3.7													3	1302.87	0.817875
aLLTELQALEEHLk	Q65XA0	N-Term(iTRAQ8plex); K14(iTRAQ8plex)	15.9	0.989438	10	1.23725	10	0.981803	10	1.01538	10	0.950682	10	0.938694	10	4	2216.3	-2.82498
aLMDEMAVVATk	Q9FYX8	N-Term(iTRAQ8plex); K12(iTRAQ8plex)	15.7	1.02167	1	0.902682	1	0.855901	1	0.947317	1	0.969268	1	0.955994	1	3	1887.05	0.0747387
aLMIDAPVENVEA	Q84M35	N-Term(iTRAQ8plex)	80.22	0.993555	5	1.04472	5	1.01098	5	0.994866	5	0.985693	5	1.14523	5	2	1675.88	-1.76385
aLmIDAPVENVEA	Q84M35	N-Term(iTRAQ8plex); M3(Oxidation)	53.67	0.973866	1	0.991035	1	0.936605	1	0.942243	1	1.13465	1	0.970709	1	2	1691.88	-2.70993
aLMLQSYLEk	B9FAH6;B9FR59	N-Term(iTRAQ8plex); K10(iTRAQ8plex)	31.71													3	1804.04	-2.73567
aLNDEIHGk	A2X9Q4	N-Term(iTRAQ8plex); K9(iTRAQ8plex)	33.43	1.02848	6	1.07454	6	1.00456	6	1.01033	6	1.04976	6	1.02128	6	2	1604.92	-3.55791
aLNINEDLGQIk	Q0JNM8	N-Term(iTRAQ8plex); K12(iTRAQ8plex)	17.17	0.904001	1	0.870124	1	0.825309	1	0.990283	1	1.12207	1	0.947441	1	3	1936.15	11.4892
aLNLEPGATVk	Q9LGQ6	N-Term(iTRAQ8plex); K11(iTRAQ8plex)	43.3	1.05411	2	0.929715	2	0.912669	2	0.789828	2	0.797182	2	0.742842	2	2	1721.04	-0.700947
aLNLGVNVk	Q8L6I2;Q8L6I1;Q8L6I3	N-Term(iTRAQ8plex); K9(iTRAQ8plex)	35.73													2	1535.97	-3.3466
aLNQISSYDTSAk	Q2QU07	N-Term(iTRAQ8plex); K13(iTRAQ8plex)	22.26	0.815004	1	0.843839	1	0.869829	1	0.906608	1	0.949739	1	0.820766	1	2	2006.1	-3.15086
aLNSHPMk	A3ABM0;A6N081;Q8W0C5	N-Term(iTRAQ8plex); K8(iTRAQ8plex)	25.13													3	1505.87	-3.87142
aLNVQNLk	B9FAE7	N-Term(iTRAQ8plex); K8(iTRAQ8plex)	41.97	0.917686	2	0.886936	2	0.848762	2	1.03955	2	1.05317	2	0.9457	2	2	1507.94	-2.96426
aLPAGDGAAAAAAQLTR	A2X1X5	N-Term(iTRAQ8plex)	43.35	1.05303	2	0.945229	2	1.26601	2	1.04641	2	1.09251	2	1.14101	2	3	1829.02	1.50353
aLPAVAPLPTPAESk	B9EYD6	N-Term(iTRAQ8plex); K15(iTRAQ8plex)	41.62	0.895515	1	0.835241	1	0.656895	1	0.934125	1	1.18072	1	1.01425	1	2	2070.24	0.250183
aLPEAVGk	A2YWY6	N-Term(iTRAQ8plex); K8(iTRAQ8plex)	19.99	1.72643	1	2.44646	1	2.10834	1	1.68852	1	0.978005	1	1.36261	1	3	1392.87	-1.14055
aLPGGEIHPLTR	B8A8F5	N-Term(iTRAQ8plex)	18.74	1.01061	1	1.30244	1	1.31401	1	0.918423	1	0.694738	1	0.974306	1	3	1564.91	0.642421
aLPLLTVDDFHR	Q6Z3Y9	N-Term(iTRAQ8plex)	64.29	0.993028	276	0.995577	274	0.953397	275	1.0106	275	1.01483	276	0.981185	276	3	1700.96	0.0882087
aLPSDPDLk	A3CII5	N-Term(iTRAQ8plex); K9(iTRAQ8plex)	18.75	0.907278	1	0.909061	1	0.890417	1	1.03883	1	1.07061	1	1.10668	1	3	1563.92	-1.17087
aLPTLLNTAR	Q5Z9S8	N-Term(iTRAQ8plex)	14.49	1.06647	1	0.983397	1	1.02196	1	0.948906	1	0.900877	1	0.977716	1	2	1373.84	-2.12289
aLPTPGDEHPk	B8A773	N-Term(iTRAQ8plex); K11(iTRAQ8plex)	34.02	0.979313	7	0.954398	7	0.941106	7	1.06215	7	0.987419	7	0.882382	7	3	1769.99	-3.6879
aLQDHSk	Q5VS79	N-Term(iTRAQ8plex); K7(iTRAQ8plex)	17.09	0.886411	10	0.931019	10	0.866894	10	1.28905	10	1.15264	10	1.07427	10	3	1406.82	-3.72414
aLQHYTELPDIk	A3CE45	N-Term(iTRAQ8plex); K12(iTRAQ8plex)	25.84	1.01677	15	1.07674	15	1.04269	15	1.1155	15	0.974831	15	0.990061	15	4	2036.16	-1.53629
aLQLVEDIR	Q9ST82	N-Term(iTRAQ8plex)	8.25	0.949049	28	0.889793	28	0.934258	28	0.971653	28	1.0116	28	0.976307	28	2	1360.81	-2.94043
aLQNTcLk	Q53P96	N-Term(iTRAQ8plex); C6(Carbamidomethyl); K8(iTRAQ8plex)	17.05	0.869599	1	0.786394	1	0.757489	1	0.884018	1	1.00919	1	0.868292	1	2	1555.91	0.772755
aLQPLLNAR	Q75L45	N-Term(iTRAQ8plex)	23.35	0.874215	6	0.873266	6	0.860857	6	0.91268	6	0.918255	6	0.912884	6	2	1299.8	-1.93373
aLQQSTIk	Q69V57;P17784;Q5N725;Q6YPF1	N-Term(iTRAQ8plex); K8(iTRAQ8plex)	36.41													2	1496.93	0.35657
aLQYFPTIEDPGAR	B9FAE7	N-Term(iTRAQ8plex)	13.36	0.998737	1	0.891478	1	1.21987	1	0.889141	1	0.913349	1	1.11845	1	2	1882	-2.85021
aLREDELLYLk	B8B2H8	N-Term(iTRAQ8plex); K11(iTRAQ8plex)	11.81	1.00917	2	1.23705	2	0.891654	2	1.11409	2	1.01425	2	0.918469	2	4	1971.18	1.21893
aLSDQNIIR	Q8RYK7	N-Term(iTRAQ8plex)	16.67	0.898327	1	0.842749	1	0.88912	1	0.986909	1	1.08572	1	1.01947	1	2	1333.77	-0.675034
aLSELRPLR	Q0DL03	N-Term(iTRAQ8plex)	1.06	0.858003	2	0.876438	2	0.848764	2	1.06758	2	1.04415	2	1.06572	2	3	1358.84	-1.17121
aLSEPVR	Q8H350	N-Term(iTRAQ8plex)	5.01	0.883798	1	1.05534	1	1.13321	1	0.997345	1	1.04571	1	1.11011	1	2	1075.64	-4.13047
aLSGEQLR	B8B0N6	N-Term(iTRAQ8plex)	32.74	1.27505	1	1.21226	1	1.29892	1	1.01606	1	0.965551	1	0.963873	1	3	1177.68	-1.31523
aLSGHNNLVk	B8B2H8	N-Term(iTRAQ8plex); K10(iTRAQ8plex)	36.44	1.02684	3	1.03424	3	0.97653	3	1.01225	3	1.07858	3	1.04625	3	2	1660.99	-0.705003
aLSLPQLcNAPANISDcPR	B9FW14	N-Term(iTRAQ8plex); C8(Carbamidomethyl); C17(Carbamidomethyl)	34.65	1.14531	2	1.07578	2	1.25992	2	0.995725	2	1.27804	2	1.23059	2	3	2401.23	1.80245
aLSLVEPR	A2Z8X6	N-Term(iTRAQ8plex)	19.16	0.934596	1	0.940332	1	0.972321	1	0.996234	1	1.08308	1	1.05036	1	2	1188.72	-3.19342
aLSNQHQVR	Q6Z7B0	N-Term(iTRAQ8plex)	33.62	1.27951	3	1.43568	3	1.21879	3	1.03553	3	0.899737	3	1.11014	3	3	1356.76	-2.54469
aLSPLLQHkPPPPPAVAPET	Q69IN5	N-Term(iTRAQ8plex); K9(iTRAQ8plex)	15.39	1.04348	10	1.15714	10	0.997248	10	1.08648	10	1.01149	10	1.0154	10	3	2668.56	-2.50838
aLSYPLk	Q9LWT6	N-Term(iTRAQ8plex); K7(iTRAQ8plex)	19.31	0.800337	1	0.736934	1	0.743635	1	1.15202	1	1.16585	1	1.06585	1	2	1399.87	-4.38338
aLTAAGISHIIDMTGNTIGk	B9FEY9	N-Term(iTRAQ8plex); K20(iTRAQ8plex)	15.12	1.04704	2	1.07828	2	0.961636	2	1.02734	2	1.02069	2	0.962545	2	4	2592.46	-1.69564
aLTAFDDEDEHPAYR	Q5QLM8	N-Term(iTRAQ8plex)	33.72	1.0156	3	1.07068	3	1.0657	3	0.988732	3	0.938494	3	0.97173	3	3	2053.97	-3.09017
aLTGEQDASAR	B8BJD1	N-Term(iTRAQ8plex)	36.62	0.951055	3	0.934476	3	0.911975	3	0.878372	3	0.910868	3	0.933241	3	2	1422.75	-2.73873
aLTHTHQVATGAAVPTEPHAAR	Q6Z5Z5	N-Term(iTRAQ8plex)	10.45	1.09104	12	1.18982	12	1.0201	12	1.07103	12	0.980807	12	0.980592	12	4	2540.36	-1.31521
aLTNLALk	C7IWI9	N-Term(iTRAQ8plex); K8(iTRAQ8plex)	21.65	0.874173	4	0.820707	4	0.838488	4	1.08806	4	1.08508	4	1.04323	4	2	1451.93	-4.11409
aLTNVQTLPR	Q01JZ7	N-Term(iTRAQ8plex)	32.41	1.15523	1	1.1594	1	1.39383	1	0.989546	1	1.02852	1	1.19957	1	3	1416.84	-2.70081
aLTPAQAQPQPEPAADk	Q5N9F3	N-Term(iTRAQ8plex); K17(iTRAQ8plex)	38.54	0.375915	1	0.806859	1	1.10649	1	0.735238	1	0.725963	1	0.875596	1	2	2341.29	-2.95585
aLTTEEIDQHLTAISERD	Q9LSU3	N-Term(iTRAQ8plex)	65.33	1.12009	5	1.15578	5	1.15259	5	1.05144	5	1.05493	5	0.927096	5	3	2346.2	-2.81883
aLTVPELTQQMWDAk	Q43594;P45960;Q76FS3;Q8H7U1;Q40665;A3ANA0	N-Term(iTRAQ8plex); K15(iTRAQ8plex)	62.73													3	2339.28	-2.82502
aLTVPELTQQmWDAk	Q43594;P45960;Q76FS3;Q8H7U1;Q40665;A3ANA0	N-Term(iTRAQ8plex); M11(Oxidation); K15(iTRAQ8plex)	31.4													3	2355.28	-1.8389
aLVAAVk	B7E4J4	N-Term(iTRAQ8plex); K7(iTRAQ8plex)	3.7	1.04738	3	1.08553	3	1.00312	3	1.12046	3	1.11715	3	0.952882	3	2	1279.85	-1.93945
aLVAGFVk	B8AM35	N-Term(iTRAQ8plex); K8(iTRAQ8plex)	30.33	0.800205	1	0.705966	1	0.666594	1	0.818316	1	0.838714	1	0.841539	1	3	1412.91	-0.301205
aLVAYYQk	A2ZB00	N-Term(iTRAQ8plex); K8(iTRAQ8plex)	33.97	0.88445	7	0.847229	7	0.834566	7	1.03602	7	1.05937	7	0.956618	7	2	1563.93	-4.37669
aLVDAPDMVR	Q6K1Q6	N-Term(iTRAQ8plex)	31.65	0.971052	5	1.01882	5	1.05975	5	1.10884	5	1.11088	5	1.09823	5	2	1390.76	-1.3987
aLVDAPDmVR	Q6K1Q6	N-Term(iTRAQ8plex); M8(Oxidation)	23.43	1.24074	1	1.55487	1	1.60515	1	1.23665	1	1.11831	1	1.37679	1	3	1406.76	-2.07299
aLVEIAcTR	A2X9Q4	N-Term(iTRAQ8plex); C7(Carbamidomethyl)	14.33	1.09613	3	1.04506	3	1.09022	3	0.899746	3	0.875785	3	0.885366	3	2	1336.75	-3.48975
aLVGEGSYGR	Q69IN5	N-Term(iTRAQ8plex)	31.82	0.837408	1	0.835166	1	0.877187	1	1.18	1	1.10878	1	1.10669	1	2	1312.71	-1.43842
aLVHYYPVAGR	Q9FTG9	N-Term(iTRAQ8plex)	29.07	1.33499	5	1.51868	5	1.34736	5	1.10284	5	0.99293	5	0.97149	5	3	1549.88	-2.05794
aLVVINPGNPTGQVLAEENQR	Q338N8	N-Term(iTRAQ8plex)	59.54	1.04491	1	0.934035	1	1.0403	1	0.73071	1	1.04185	1	0.923786	1	3	2523.38	-2.08268
aLYNDMSR	B8ALY9;Q0IW35	N-Term(iTRAQ8plex)	10.2													2	1273.65	-2.54739
aLYNDmSR	B8ALY9;Q0IW35	N-Term(iTRAQ8plex); M6(Oxidation)	9.15													2	1289.64	-2.35902
aMAAVLLR	Q6ZL37	N-Term(iTRAQ8plex)	12.51	1.02482	1	0.977535	1	1.0175	1	0.929638	1	0.956021	1	0.888162	1	2	1148.71	-2.27272
aMDDAGLEk	Q6Z7B0	N-Term(iTRAQ8plex); K9(iTRAQ8plex)	33.67	0.936532	2	0.801325	2	0.828408	2	1.00532	2	0.987074	2	0.926702	2	2	1557.83	-9.51599
aMDLPSGcSIAATFSDcPk	Q75HK2	N-Term(iTRAQ8plex); C8(Carbamidomethyl); C17(Carbamidomethyl); K19(iTRAQ8plex)	57	0.892117	95	0.785745	95	0.835637	95	1.04686	95	1.11408	95	1.04913	95	3	2636.28	-7.2206
amDLPSGcSIAATFSDcPk	Q75HK2	N-Term(iTRAQ8plex); M2(Oxidation); C8(Carbamidomethyl); C17(Carbamidomethyl); K19(iTRAQ8plex)	5.34	0.971877	1	0.907041	1	0.952846	1	0.806627	1	0.982233	1	0.858882	1	3	2652.29	-1.00254
aMEEADVk	Q6K1Q6	N-Term(iTRAQ8plex); K8(iTRAQ8plex)	32.55	0.845815	3	0.807945	3	0.848419	3	1.05879	3	1.0604	3	0.993212	3	2	1500.82	-0.858744
aMELSGPR	Q5Y8C8	N-Term(iTRAQ8plex)	13.53	0.951368	1	0.968677	1	0.994341	1	1.11244	1	1.19282	1	1.12256	1	2	1164.63	-2.574
aMENEMLLR	A2XHR1	N-Term(iTRAQ8plex)	7.61	0.871712	11	0.839341	11	0.912996	11	1.01605	11	1.05398	11	1.08568	11	2	1410.73	-2.86699
amENEMLLR	A2XHR1	N-Term(iTRAQ8plex); M2(Oxidation)	9.45	0.972499	4	0.935832	4	0.989492	4	0.97891	4	0.943797	4	1.06114	4	2	1426.73	-2.09422
aMESEDGVSGAVR	B8AUM3	N-Term(iTRAQ8plex)	56.07	1.07397	8	1.09038	8	1.40871	8	1.06687	8	1.0851	8	1.15537	8	3	1611.79	-1.8389
amESEDGVSGAVR	B8AUM3	N-Term(iTRAQ8plex); M2(Oxidation)	38.91	0.967589	3	1.17602	3	0.831179	3	0.919265	3	0.960722	3	1.06004	3	2	1627.78	-3.1507
aMESHVAk	Q652I7	N-Term(iTRAQ8plex); K8(iTRAQ8plex)	1.73	1.02067	1	1.19617	1	1.14535	1	0.990183	1	0.924747	1	1.1256	1	3	1480.84	-1.20724
aMESLNIPk	Q6ZIF9	N-Term(iTRAQ8plex); K9(iTRAQ8plex)	34.54	1.00037	1	1.04961	1	0.918967	1	1.10884	1	1.07856	1	0.964732	1	2	1610.94	-0.60528
aMEVDTQAVQR	Q5WAB3	N-Term(iTRAQ8plex)	32.13	1.00383	2	1.14136	2	1.38944	2	1.034	2	1.02095	2	1.33483	2	2	1551.8	-5.23242
aMGDVSDR	Q6L4S0	N-Term(iTRAQ8plex)	7.36	1.06354	1	1.17613	1	1.08603	1	1.07167	1	1.08581	1	1.12944	1	2	1154.57	-2.92132
aMGQAISk	Q6AVS5	N-Term(iTRAQ8plex); K8(iTRAQ8plex)	22.03	0.874652	2	0.862359	2	0.852314	2	1.0255	2	1.0848	2	1.06298	2	2	1413.83	-6.14652
aMHAVIDR	P0C510	N-Term(iTRAQ8plex)	14.19	0.967634	74	1.03541	74	0.944581	74	1.03903	74	1.04473	74	1.01047	74	2	1216.68	-1.30064
amHAVIDR	P0C510	N-Term(iTRAQ8plex); M2(Oxidation)	19.09	1.02075	3	1.19381	3	1.00795	3	1.24095	3	1.00807	3	1.1395	3	2	1232.67	-2.11003
aMIGQVAGGGR	Q2QNF3	N-Term(iTRAQ8plex)	39.46	0.915547	3	0.97896	3	1.01873	3	1.01012	3	1.03707	3	1.02016	3	2	1320.73	-3.3287
aMNEINAAAR	Q6L4S3;Q6ZIV7	N-Term(iTRAQ8plex)	32.56													2	1364.72	-3.7228
amNEINAAAR	Q6L4S3;Q6ZIV7	N-Term(iTRAQ8plex); M2(Oxidation)	29.77													2	1380.72	-2.82594
aMNEINAAQR	Q5VNU2	N-Term(iTRAQ8plex)	27.16	0.816321	1	0.839119	1	0.847362	1	1.05255	1	0.954793	1	1.07794	1	2	1421.74	-2.86946
aMNVLQSDDAR	A2Z024	N-Term(iTRAQ8plex)	26.9	0.987373	1	0.988156	1	0.991518	1	1.0431	1	1.10949	1	1.00553	1	2	1523.78	-0.409107
aMPFIIGNETFEk	Q6AVV6	N-Term(iTRAQ8plex); K13(iTRAQ8plex)	34.75	0.899058	36	0.875767	36	0.947148	36	0.993643	36	1.11032	36	1.06679	36	3	2105.15	-2.24161
amPGAAAALIGDVSAR	Q01HN4	N-Term(iTRAQ8plex); M2(Oxidation)	17.15	1.01632	1	1.19797	1	1.43682	1	1.02234	1	1.03663	1	1.07742	1	3	1790.97	-1.07842
aMPTFFLIk	Q0J9V5	N-Term(iTRAQ8plex); K9(iTRAQ8plex)	26.93	1.00783	5	0.881094	5	0.914863	5	0.913215	5	1.01537	5	0.968867	5	3	1676.01	0.0266402
aMQAVFEAMDR	Q7EZL2	N-Term(iTRAQ8plex)	9.65	0.846517	5	0.767682	5	0.860416	5	1.06326	5	1.05342	5	1.05237	5	2	1572.78	-2.55332
amQLLESGLk	Q0E2I8;A2YDY2	N-Term(iTRAQ8plex); M2(Oxidation); K10(iTRAQ8plex)	21.88													2	1714	-3.90484
aMQLLESGLk	Q0E2I8;A2YDY2	N-Term(iTRAQ8plex); K10(iTRAQ8plex)	56.22													3	1698	-2.37918
aMSAAQDSEcNEDDR	Q0D6U7	N-Term(iTRAQ8plex); C10(Carbamidomethyl)	44.53	0.899403	1	0.78005	1	0.806561	1	0.603257	1	0.687555	1	0.655713	1	2	2002.84	-0.684813
aMSDEEk	C6F1P3	N-Term(iTRAQ8plex); K7(iTRAQ8plex)	7.98	1.16457	1	0.994569	1	0.847985	1	0.869367	1	0.78962	1	0.672148	1	2	1417.74	-5.11138
aMSSMTEVVQTVk	Q9ST27	N-Term(iTRAQ8plex); K13(iTRAQ8plex)	15.26	1.00706	4	1.01523	4	0.954064	4	0.966391	4	0.937207	4	0.898625	4	3	2019.1	-3.83622
aMTPVEEVDLSAVR	Q0JFH7	N-Term(iTRAQ8plex)	44.48	1.14849	2	1.12614	2	1.71073	2	1.46459	2	1.23485	2	1.13102	2	3	1820.97	-2.79612
aMTVVDDAEk	Q337E7	N-Term(iTRAQ8plex); K10(iTRAQ8plex)	59.82	0.865094	3	0.950365	3	0.967984	3	1.09416	3	1.15705	3	1.05209	3	2	1686.92	-1.62414
aMVEELLk	B8AGT3	N-Term(iTRAQ8plex); K8(iTRAQ8plex)	31.75	0.947165	2	0.836523	2	0.838024	2	0.879275	2	0.868491	2	0.847131	2	3	1540.92	-0.33348
aMVELDGAPFk	Q654U8	N-Term(iTRAQ8plex); K11(iTRAQ8plex)	35.06	1.00444	3	0.913657	3	0.894865	3	0.973494	3	0.976402	3	0.948424	3	2	1786	-3.55077
aMYSLSLENADQR	Q337L2	N-Term(iTRAQ8plex)	11.77	0.941567	1	0.927833	1	0.836587	1	0.959125	1	0.987388	1	0.83368	1	2	1801.92	5.30959
aNAISSYSk	Q7F1H3	N-Term(iTRAQ8plex); K9(iTRAQ8plex)	33.55	0.784013	3	0.732381	3	0.689774	3	1.1625	3	1.14951	3	1.17971	3	2	1548.88	-5.26649
aNALLPSIPk	B8ADW8	N-Term(iTRAQ8plex); K10(iTRAQ8plex)	34.27	0.93131	2	0.837866	2	0.885657	2	0.954504	2	1.02029	2	0.94285	2	2	1632.03	-2.19251
aNDAFYk	Q6L4S3	N-Term(iTRAQ8plex); K7(iTRAQ8plex)	17.84	0.923274	6	1.20427	6	1.14948	6	1.23891	6	1.26458	6	1.11947	6	2	1436.79	-4.09709
aNDILPSIPk	A2Y963	N-Term(iTRAQ8plex); K10(iTRAQ8plex)	36.04	0.900427	2	0.788509	2	0.837166	2	0.881765	2	0.927051	2	0.918312	2	2	1676.02	1.38382
aNDIPNINILk	A2X9M7	N-Term(iTRAQ8plex); K11(iTRAQ8plex)	20.45	0.965419	1	0.771229	1	0.880154	1	0.906649	1	1.00306	1	0.984288	1	2	1833.1	-3.22208
aNEAEAVETAk	B8A797	N-Term(iTRAQ8plex); K11(iTRAQ8plex)	48.4	0.933605	2	0.968387	2	0.919577	2	1.08542	2	0.978009	2	0.976955	2	2	1740.96	-1.29281
aNEAGETVTSLSSR	Q10RX0	N-Term(iTRAQ8plex)	46.99	1.0845	3	1.10013	3	1.10675	3	0.925139	3	0.901908	3	0.955202	3	3	1725.89	0.614345
aNEAVGAAETR	A2ZAI6	N-Term(iTRAQ8plex)	41.31	1.04044	2	1.28875	2	1.23524	2	1.0415	2	1.07918	2	1.15206	2	2	1392.74	-1.61384
aNEIFEAIAR	Q6YS11	N-Term(iTRAQ8plex)	18.57	1.03225	11	0.991322	11	1.00615	11	0.888714	11	0.932532	11	0.893875	11	2	1437.8	-1.46469
aNENYcLTVR	O24212	N-Term(iTRAQ8plex); C6(Carbamidomethyl)	29.23	0.910401	3	0.902726	3	0.946064	3	0.940467	3	1.02015	3	0.94122	3	2	1543.78	-4.31018
aNFDNEVNYLR	Q0D519	N-Term(iTRAQ8plex)	45.22	0.895544	2	0.852476	2	0.909316	2	0.977868	2	0.94755	2	0.912483	2	2	1658.85	2.15238
aNFNDkFDEVR	P35685	N-Term(iTRAQ8plex); K6(iTRAQ8plex)	5.86	0.934133	1	0.878397	1	0.827881	1	0.932849	1	1.02498	1	0.929877	1	4	1963.04	-2.63934
aNIEAQLk	Q7XMK5	N-Term(iTRAQ8plex); K8(iTRAQ8plex)	33.43	1.10902	22	1.15648	22	1.04624	22	1.10423	22	0.99275	22	0.957429	22	2	1494.91	-2.08264
aNITYGk	B9EYZ4	N-Term(iTRAQ8plex); K7(iTRAQ8plex)	24.79	0.918285	1	0.844699	1	0.793293	1	1.03025	1	0.999893	1	1.03268	1	2	1374.82	-2.31243
aNLDALWVR	B8AHN8	N-Term(iTRAQ8plex)	15.04	0.90458	1	0.790564	1	0.913194	1	0.931946	1	0.908566	1	1.074	1	3	1361.78	-0.840852
aNLNPVWNEELk	A2X226	N-Term(iTRAQ8plex); K12(iTRAQ8plex)	54.39	0.920445	2	0.799259	2	0.855905	2	0.916006	2	1.00542	2	0.901079	2	2	2035.15	1.59235
aNLPGAENLVVQR	A3CE45	N-Term(iTRAQ8plex)	71.75	0.917882	10	0.940488	10	1.02893	10	1.03381	10	1.11309	10	1.14025	10	3	1684.96	-1.59646
aNLVESIk	Q53WK4	N-Term(iTRAQ8plex); K8(iTRAQ8plex)	7	1.0143	1	0.833031	1	0.808778	1	0.974167	1	0.959739	1	0.884854	1	2	1481.9	-10.6606
aNMHELGLGVTGNNPNYGTAR	Q0JFH7	N-Term(iTRAQ8plex)	57.17	0.891088	26	0.870078	26	0.87394	26	0.961347	26	0.991441	26	0.965499	26	3	2490.25	1.49816
aNmHELGLGVTGNNPNYGTAR	Q0JFH7	N-Term(iTRAQ8plex); M3(Oxidation)	49.74	0.981349	1	1.02915	1	0.947525	1	0.946131	1	0.916542	1	0.886961	1	3	2506.23	-2.64385
aNNLPALASYAyNDYYQR	Q7XI50	N-Term(iTRAQ8plex); Y12(iTRAQ8plex)	0.86	1.11589	5	1.01253	5	0.998737	5	1.02481	5	1.1396	5	1.08471	5	3	2715.38	-7.25492
aNPAAADMVDR	Q6ZD89	N-Term(iTRAQ8plex)	40.16	1.07477	2	1.13206	2	1.17822	2	0.823968	2	0.868277	2	0.817936	2	2	1434.73	-1.66712
aNPAAADmVDR	Q6ZD89	N-Term(iTRAQ8plex); M8(Oxidation)	26.53	1.27412	1	1.81553	1	2.48584	1	1.68997	1	1.27276	1	1.42418	1	3	1450.71	-10.0594
aNPFTVAYNR	Q75GE8	N-Term(iTRAQ8plex)	13.46	0.957492	1	1.00645	1	0.956154	1	0.892768	1	0.977146	1	0.881725	1	2	1456.78	-0.970882
aNSDAAAFAGAR	A2XEW6	N-Term(iTRAQ8plex)	46.42	1.00248	1	1.14609	1	1.36353	1	0.967743	1	1.01361	1	1.16294	1	3	1425.74	-1.11803
aNSEATLGk	Q69V57	N-Term(iTRAQ8plex); K9(iTRAQ8plex)	35.03	1.25733	2	1.45921	2	1.28464	2	1.15944	2	0.899424	2	1.03111	2	3	1498.86	-2.49558
aNSEATLGTYk	P17784	N-Term(iTRAQ8plex); K11(iTRAQ8plex)	45.88	1.08422	2	1.04805	2	0.997397	2	1.06444	2	1.03827	2	0.955369	2	2	1762.98	-1.04515
aNSLAQLGk	Q53P96	N-Term(iTRAQ8plex); K9(iTRAQ8plex)	48.98	0.875348	4	0.831474	4	0.868312	4	0.976382	4	0.995137	4	0.953596	4	2	1509.91	-4.43014
aNSLLEFEk	P09229	N-Term(iTRAQ8plex); K9(iTRAQ8plex)	40.52	0.969964	7	0.948082	7	0.986939	7	1.05645	7	1.11489	7	0.990055	7	2	1658.95	-5.03276
aNSTDcIR	Q75L87	N-Term(iTRAQ8plex); C6(Carbamidomethyl)	13.99	0.999279	1	0.694574	1	0.806277	1	0.845182	1	0.847563	1	0.997435	1	2	1240.62	-2.43993
aNVDYEk	Q1H9B9	N-Term(iTRAQ8plex); K7(iTRAQ8plex)	28.13	0.976818	1	1.27404	1	1.19226	1	1.15901	1	1.18366	1	1.16546	1	2	1446.79	-8.95332
aNVSGFGSDQFDGGDPR	Q6EP35	N-Term(iTRAQ8plex)	44.32	1.19875	1	1.39826	1	1.35239	1	0.86179	1	0.883901	1	0.874751	1	2	2029.95	-2.19615
aNWYGLLGk	H2KX19	N-Term(iTRAQ8plex); K9(iTRAQ8plex)	27.97	0.892499	8	0.861569	8	0.861092	8	1.01475	8	1.05303	8	0.999847	8	3	1629.95	-1.71746
aNYDIGEEAVQR	B9EXU9	N-Term(iTRAQ8plex)	14.48	0.983971	1	1.02683	1	1.01521	1	0.924586	1	0.988111	1	0.995713	1	2	1668.85	0.459014
aNYLVDVAPGTER	Q2QYY2	N-Term(iTRAQ8plex)	64.3	1.05772	3	1.18058	3	1.20722	3	1.05174	3	1.0596	3	1.19917	3	2	1708.91	-2.73163
aPAAAAAAPPR	Q7XPL0	N-Term(iTRAQ8plex)	68.37	0.874369	4	1.01795	4	1.01943	4	1.41309	4	1.35642	4	1.46438	4	3	1267.74	-2.65231
aPAADAEAGGGGDTGHAR	B9EXZ6	N-Term(iTRAQ8plex)	54.36	1.10023	3	1.69196	3	1.4632	3	1.20563	3	0.9025	3	0.973149	3	3	1884.9	-3.33517
aPADAAADGAENGAPNSEEk	Q9AQZ5	N-Term(iTRAQ8plex); K20(iTRAQ8plex)	59.76	1.01427	1	0.845488	1	0.597795	1	0.975749	1	0.868609	1	0.954669	1	3	2493.22	-5.22351
aPAEVLGR	B9FUC1;B8B7A7	N-Term(iTRAQ8plex)	31.1													3	1116.67	-1.59447
aPAkEEEEDDEEESDk	Q5Z7N3	N-Term(iTRAQ8plex); K4(iTRAQ8plex); K16(iTRAQ8plex)	12.9	1.11203	1	0.910174	1	0.978034	1	0.992122	1	1.16217	1	1.11176	1	4	2762.35	-4.68137
aPAPDccGGLR	B8APC4	N-Term(iTRAQ8plex); C6(Carbamidomethyl); C7(Carbamidomethyl)	26.57	0.952463	3	1.23651	3	1.11659	3	1.21903	3	1.13137	3	1.81695	3	3	1477.72	-1.63509
aPATEEkPR	A6MZZ5	N-Term(iTRAQ8plex); K7(iTRAQ8plex)	22.41	1.13146	1	1.32567	1	1.19717	1	1.42572	1	1.09736	1	1.19126	1	3	1606.93	-5.06492
aPATHQPVQVSSPSFR	Q01JZ7	N-Term(iTRAQ8plex)	20.17	2.21708	1	1.96759	1	1.68145	1	1.40479	1	0.925843	1	1.12436	1	3	2013.08	-0.711237
aPDAFYALR	Q338N8	N-Term(iTRAQ8plex)	19.04	1.10413	1	1.0712	1	1.07141	1	0.790275	1	0.813627	1	0.76686	1	2	1327.73	-1.62668
aPDAIAAEER	A2XS80	N-Term(iTRAQ8plex)	46.03	0.73814	2	0.851238	2	1.08234	2	1.25171	2	1.22998	2	1.44987	2	3	1346.72	-1.66643
aPDHLAR	O82451	N-Term(iTRAQ8plex)	6.5	1.0031	1	1.8909	1	1.17787	1	0.895844	1	0.855332	1	1.31735	1	3	1083.62	-2.4606
aPDLSNVISk	Q8RUI4	N-Term(iTRAQ8plex); K10(iTRAQ8plex)	25.47	0.928924	1	0.858301	1	0.850357	1	0.902585	1	0.920248	1	0.82134	1	2	1651.98	-5.23856
aPEIDEDLHSR	B9GBE8	N-Term(iTRAQ8plex)	56.61	1.12577	2	1.38446	2	1.30592	2	0.91575	2	0.833	2	0.984514	2	3	1585.81	-2.10375
aPELVDAR	Q6L569	N-Term(iTRAQ8plex)	9.51	1.15405	2	1.13191	2	1.28199	2	0.890368	2	0.924126	2	1.04167	2	2	1174.67	-2.89598
aPEYLALNDk	Q7XPI5	N-Term(iTRAQ8plex); K10(iTRAQ8plex)	16.72	0.945196	2	0.867145	2	0.912664	2	1.07644	2	1.08494	2	1.00228	2	2	1741.99	-1.28944
aPGGAPANVAcAISk	A2YQL4	N-Term(iTRAQ8plex); C11(Carbamidomethyl); K15(iTRAQ8plex)	79.01	0.967391	6	0.968431	6	0.912841	6	0.9005	6	0.916888	6	0.895298	6	2	1992.12	0.824183
aPGGAPANVAIAVAR	A2WXV8	N-Term(iTRAQ8plex)	27.99	1.25493	1	1.21874	1	1.98732	1	1.11121	1	1.1632	1	1.23412	1	3	1638.96	-1.95943
aPGGGAVGSYLGMTGk	B8B475	N-Term(iTRAQ8plex); K16(iTRAQ8plex)	30.83	0.964466	2	0.838406	2	0.850564	2	0.918588	2	0.879122	2	0.845691	2	2	2031.12	-0.109002
aPGLAAAAAR	Q2R4L1	N-Term(iTRAQ8plex)	37.81	1.16223	3	1.24259	3	1.29181	3	1.16045	3	1.28303	3	1.31616	3	3	1172.7	-5.14826
aPGVGPGDPGcAAcR	Q8H2M1	N-Term(iTRAQ8plex); C11(Carbamidomethyl); C14(Carbamidomethyl)	23.96	1.218	1	1.94415	1	3.01825	1	1.3265	1	1.05797	1	2.11236	1	3	1745.84	0.368336
aPGVPVAELHR	A2X8C7	N-Term(iTRAQ8plex)	19.73	1.09266	1	1.24339	1	0.996975	1	0.729469	1	0.540273	1	0.712488	1	3	1449.84	-2.56501
aPHIEYPVR	A2XAL2	N-Term(iTRAQ8plex)	32.15	1.22637	1	1.4869	1	1.25516	1	1.2786	1	0.940535	1	1.09566	1	3	1385.78	-2.33137
aPIEEcR	Q0JJQ7;P43279	N-Term(iTRAQ8plex); C6(Carbamidomethyl)	20.67													2	1178.61	-3.27352
aPIGEEVEGGR	Q5VR12	N-Term(iTRAQ8plex)	30.64	0.918323	2	1.06833	2	1.15811	2	0.993425	2	0.974718	2	1.05762	2	2	1417.76	-1.51636
aPIVVDLQR	Q6Z5P1;Q654U5	N-Term(iTRAQ8plex)	15.91													2	1314.8	-2.40343
aPLGENTVLLR	Q5WMY3	N-Term(iTRAQ8plex)	58.8	0.985294	3	1.2112	3	1.14387	3	1.12892	3	1.1887	3	1.28819	3	3	1486.89	0.436866
aPLGQNTVLLR	Q10LN7	N-Term(iTRAQ8plex)	37.89	0.98651	3	1.08639	3	1.31429	3	1.11429	3	1.22753	3	1.41826	3	3	1485.9	-1.40373
aPLLIGcDVR	Q9FXT4;Q7XIV4	N-Term(iTRAQ8plex); C7(Carbamidomethyl)	18.07													2	1417.81	-1.48124
aPLPLDGTR	Q9LGQ6	N-Term(iTRAQ8plex)	30.68	1.27374	1	1.81459	1	1.61512	1	0.954081	1	0.877355	1	1.24036	1	3	1243.73	-2.56513
aPLQHDNASSAPPLYPPTk	B8AXT7	N-Term(iTRAQ8plex); K19(iTRAQ8plex)	13.59	1.01696	2	1.10935	2	1.08625	2	1.09717	2	0.934308	2	1.02907	2	4	2612.43	-1.2966
aPLQSQGNDDVVDLPR	A2YPZ9	N-Term(iTRAQ8plex)	28.23	0.937518	2	1.13657	2	1.18307	2	0.848681	2	0.931876	2	1.00292	2	3	2028.05	-6.48133
aPMIDNPDFk	B9FWE4	N-Term(iTRAQ8plex); K10(iTRAQ8plex)	46.48	0.956968	2	0.843453	2	0.847638	2	1.05073	2	1.03266	2	0.983888	2	2	1755.95	-4.6059
aPMVFFHTNPLGR	Q8GU51	N-Term(iTRAQ8plex)	25.96	0.979944	21	1.10663	21	1.04772	21	1.00171	21	1.0146	21	1.04382	21	3	1790.96	-2.07534
aPNTPISWETR	A2ZHB1;Q0IV73	N-Term(iTRAQ8plex)	35.72													3	1575.84	-1.35271
aPNVNLGETVk	A2YMS7	N-Term(iTRAQ8plex); K11(iTRAQ8plex)	46.76	0.94067	1	0.769075	1	0.823141	1	0.955928	1	1.02284	1	0.925564	1	2	1750.03	0.259956
aPPAPQHPLSPMGEAcSR	Q336V9	N-Term(iTRAQ8plex); C16(Carbamidomethyl)	47.47	1.00563	23	1.10384	23	1.05649	23	1.04388	23	0.996666	23	0.988445	23	3	2207.1	-0.912289
aPPAPQHPLSPmGEAcSR	Q336V9	N-Term(iTRAQ8plex); M12(Oxidation); C16(Carbamidomethyl)	16.03	1.09156	1	1.01156	1	0.935718	1	1.08756	1	1.06552	1	1.07171	1	3	2223.09	-1.52861
aPPEVVAEHTVR	Q6YPF1	N-Term(iTRAQ8plex)	59	1.28687	6	1.31947	6	1.17765	6	0.980974	6	0.941581	6	0.91601	6	3	1608.9	-1.32409
aPPFPGQNSLQR	Q6ZI95	N-Term(iTRAQ8plex)	15.56	1.14967	1	1.32456	1	1.51	1	1.1589	1	1.09469	1	1.22177	1	3	1615.87	-8.0795
aPPPPPPTATk	A3A4D6	N-Term(iTRAQ8plex); K11(iTRAQ8plex)	21.4	1.13614	1	1.18567	1	1.08928	1	1.49841	1	1.34422	1	1.18442	1	2	1682	-2.86616
aPPSPSPSTSSR	Q6Z901	N-Term(iTRAQ8plex)	38.74	1.1375	1	2.80418	1	1.14793	1	1.14224	1	1.34092	1	1.34036	1	3	1474.78	-2.07825
aPQAAGTIHTDFER	B8BBN7	N-Term(iTRAQ8plex)	41.19	1.11985	8	1.19981	8	1.09388	8	1.08507	8	0.967538	8	0.998747	8	3	1817.94	-1.98853
aPQESVDDDFGDFQAAG	A2ZVD7	N-Term(iTRAQ8plex)	32.09	0.84632	1	1.20281	1	1.05765	1	0.932679	1	1.09338	1	0.975415	1	2	2072.92	-5.07165
aPQNVQEEDMR	Q851K9	N-Term(iTRAQ8plex)	39.67	0.930748	1	0.996302	1	0.998825	1	0.7178	1	0.804286	1	0.790685	1	2	1620.79	-1.98017
aPSLLGGFTk	B9G125	N-Term(iTRAQ8plex); K10(iTRAQ8plex)	2.84	1.01745	2	0.898294	2	0.912853	2	0.993133	2	0.932671	2	0.90685	2	3	1598.97	-0.192066
aPSNEVISVLNR	Q0DWW9	N-Term(iTRAQ8plex)	10.64	1.09317	1	1.01154	1	1.3242	1	1.15352	1	1.13577	1	1.27639	1	3	1602.91	-2.66234
aPSTAPSAR	Q6K4P5	N-Term(iTRAQ8plex)	30.36	1.29313	1	1.30758	1	1.46204	1	1.12746	1	1.02976	1	1.74409	1	3	1161.65	-1.6844
aPTHAVVNEEGLDLPR	Q8H811	N-Term(iTRAQ8plex)	107.8	1.03691	54	1.1298	54	1.02353	54	1.09876	54	0.98532	54	0.988937	54	3	2022.09	-1.79277
aPVIcSTAMPYTGGDIk	Q6Z1R9	N-Term(iTRAQ8plex); C5(Carbamidomethyl); K17(iTRAQ8plex)	25.89	1.05113	2	0.955138	2	0.989448	2	0.875552	2	0.861106	2	0.972507	2	3	2389.27	-2.44597
aPVIDVTQFGYTk	Q84MQ4	N-Term(iTRAQ8plex); K13(iTRAQ8plex)	41.76	0.939341	8	0.855556	8	0.919993	8	0.94884	8	0.986355	8	0.961919	8	2	2047.17	1.2284
aPVSALAk	Q8H4Q9	N-Term(iTRAQ8plex); K8(iTRAQ8plex)	8.16	0.919806	2	0.992321	2	0.754665	2	0.918503	2	0.882237	2	0.905454	2	2	1364.87	-4.25001
aPVSQSQPATPVASVAR	A2YBG8	N-Term(iTRAQ8plex)	17.23	1.54371	1	1.39468	1	1.70546	1	1.03129	1	1.55098	1	1.60351	1	3	1970.09	-2.0641
aPVTSAEVSQDSR	Q0DB62	N-Term(iTRAQ8plex)	49.87	1.01409	3	1.13752	3	1.17637	3	0.871646	3	0.934197	3	0.978002	3	3	1650.86	-1.47327
aPVVVISHQAVLR	A2Y0Q8	N-Term(iTRAQ8plex)	56.87	1.03991	11	1.24844	11	1.05694	11	1.0058	11	0.842035	11	0.934626	11	3	1693.04	-0.921707
aQAAAIGTGLNR	Q10QG5	N-Term(iTRAQ8plex)	23.98	1.1768	1	1.53878	1	1.67926	1	1.02823	1	0.993973	1	1.21739	1	3	1446.84	1.66714
aQAEAEGk	P35685	N-Term(iTRAQ8plex); K8(iTRAQ8plex)	28.73	0.855385	3	1.02233	3	0.967539	3	1.24967	3	1.41673	3	1.38201	3	2	1411.8	-2.88511
aQAHVVR	Q7X8B5	N-Term(iTRAQ8plex)	9.69	1.02404	1	1.17268	1	1.25709	1	0.933717	1	0.879228	1	1.08573	1	2	1084.65	-0.348389
aQANWYk	Q942N7	N-Term(iTRAQ8plex); K7(iTRAQ8plex)	9.3	1.02882	1	1.06234	1	0.958199	1	0.906583	1	0.92338	1	0.940843	1	3	1488.84	0.226333
aQASSSYTSSSILR	Q8S6N5	N-Term(iTRAQ8plex)	56.87	1.17692	3	1.0357	3	1.24779	3	0.952911	3	0.931959	3	1.11389	3	3	1761.92	-2.57559
aQcPIVER	Q2R4A1	N-Term(iTRAQ8plex); C3(Carbamidomethyl)	18.21	1.04439	4	0.985683	4	0.99965	4	1.00328	4	1.00061	4	1.07792	4	2	1276.69	-3.15635
aQDcLLPMGITSENVAHR	Q84P96	N-Term(iTRAQ8plex); C4(Carbamidomethyl)	41.04	1.10378	7	1.13644	7	1.235	7	1.02263	7	0.967795	7	1.14104	7	3	2316.17	-3.0727
aQDNDFTGk	Q0DJM0;B9FJP3	N-Term(iTRAQ8plex); K9(iTRAQ8plex)	38.07													2	1603.85	-3.46744
aQDQQETSAHALR	A3A0W6	N-Term(iTRAQ8plex)	18.95	1.22529	1	1.93793	1	1.39776	1	1.24475	1	0.901193	1	0.970503	1	3	1758.9	-1.28487
aQEELIk	B8AER9	N-Term(iTRAQ8plex); K7(iTRAQ8plex)	19.95	0.930292	2	0.883237	2	0.862107	2	0.997348	2	1.01892	2	0.931346	2	2	1438.87	-1.41799
aQEELVk	Q9FYX8	N-Term(iTRAQ8plex); K7(iTRAQ8plex)	21.47	0.991224	1	0.918381	1	0.958988	1	0.886035	1	0.918761	1	0.86618	1	2	1424.85	-4.24158
aQEESYGSAGYGGR	Q7XXQ8	N-Term(iTRAQ8plex)	35.72	1.14791	3	1.17023	3	1.11056	3	0.769296	3	0.806035	3	0.977385	3	3	1735.82	-1.99184
aQEEVFLPLR	A3BCZ3	N-Term(iTRAQ8plex)	8.34	0.947323	1	0.988685	1	1.03785	1	1.095	1	1.11501	1	1.14009	1	2	1505.85	-5.84235
aQEIIANH	A2Z7A7	N-Term(iTRAQ8plex)	39.68	0.808178	2	1.01411	2	1.07548	2	0.749514	2	0.766933	2	0.984085	2	2	1199.66	-3.64196
aQEIVANH	Q9FYR9	N-Term(iTRAQ8plex)	39.35	1.02121	2	1.46644	2	1.43243	2	1.16654	2	1.1852	2	1.29222	2	2	1185.65	-1.50184
aQESLSDEER	Q94LY4	N-Term(iTRAQ8plex)	26.03	0.966614	1	0.887091	1	0.956665	1	0.783295	1	0.881172	1	0.915968	1	2	1467.72	-3.29499
aQGDADSALDR	P35687	N-Term(iTRAQ8plex)	56.24	0.935684	6	0.941506	6	0.902308	6	0.969282	6	1.00417	6	0.968939	6	2	1422.71	-3.85208
aQGSYTFADQk	Q53NP8	N-Term(iTRAQ8plex); K11(iTRAQ8plex)	48.59	0.897552	3	0.821087	3	0.828987	3	0.99691	3	1.03141	3	0.905323	3	2	1823.97	-4.76393
aQGTYTFADQR	Q53NP7	N-Term(iTRAQ8plex)	42.7	0.948334	2	0.926981	2	0.897039	2	0.894032	2	0.961524	2	0.904809	2	2	1561.79	-1.67723
aQGTYVSAGk	Q2QX08	N-Term(iTRAQ8plex); K10(iTRAQ8plex)	39.68	1.07681	4	0.977104	4	0.981602	4	1.05092	4	0.911334	4	0.897301	4	2	1589.91	-2.9485
aQGVTESR	A3BXL8	N-Term(iTRAQ8plex)	22.85	0.971726	1	0.877274	1	0.959816	1	0.910635	1	0.915491	1	0.964553	1	2	1151.63	-3.15524
aQGYAVGk	Q6H6C7	N-Term(iTRAQ8plex); K8(iTRAQ8plex)	10.71	1.11647	1	1.23532	1	0.927507	1	0.896134	1	0.918237	1	0.851406	1	2	1401.83	-0.994313
aQGYTQMVAPDAVYk	B9G6R6	N-Term(iTRAQ8plex); K15(iTRAQ8plex)	57.51	0.964481	1	0.980125	1	0.953581	1	1.01116	1	1.08292	1	1.166	1	3	2250.2	-0.991212
aQHANDVYk	B9FUE6	N-Term(iTRAQ8plex); K9(iTRAQ8plex)	25.75	1.09728	2	1.24529	2	1.09515	2	1.06057	2	0.897342	2	1.09751	2	3	1653.91	-2.82768
aQIEEQk	A2Y3Z4	N-Term(iTRAQ8plex); K7(iTRAQ8plex)	21.78	0.939217	1	1.04701	1	0.786702	1	0.837816	1	0.895152	1	0.986668	1	2	1453.84	-2.51053
aQIPGTTQDHLQIFNIEAk	A3CE45	N-Term(iTRAQ8plex); K19(iTRAQ8plex)	33.34	1.005	11	1.02243	11	0.991272	11	1.05951	11	0.939676	11	0.997549	11	4	2732.51	-2.68609
aQIQDTVVER	A2Z057	N-Term(iTRAQ8plex)	15.71	1.1062	1	1.04637	1	1.18952	1	1.13253	1	1.07896	1	1.10379	1	2	1462.81	-2.11583
aQISIYDPQVTEDQIQR	Q2QS13	N-Term(iTRAQ8plex)	58.59	1.09694	4	1.07603	4	1.14349	4	1.06022	4	0.980448	4	1.0181	4	3	2308.21	-1.12748
aQIWDTAGQER	P25766;Q652A2;Q338Z5;Q40723;Q852B4;Q8LHP5;Q94J09;Q75M17;Q8RZ83;Q75LE2;P40393;A2Y6J2;Q6AUF8;Q941S7	N-Term(iTRAQ8plex)	41.01													2	1578.82	-0.55052
aQLIATFNR	A2YAT3	N-Term(iTRAQ8plex)	5.85	0.876356	3	0.842138	3	0.915248	3	0.968599	3	0.950644	3	0.926632	3	2	1337.78	-2.16151
aQLIEDVR	Q9LI00	N-Term(iTRAQ8plex)	29.45	1.02356	3	1.0207	3	1.05378	3	0.953994	3	0.917753	3	0.907523	3	2	1247.72	-1.57295
aQLLHTFR	A2WJQ6	N-Term(iTRAQ8plex)	28.69	0.985727	46	0.986868	46	1.00616	46	0.968249	46	0.958045	46	0.942514	46	3	1289.76	-1.95155
aQLSDLEWk	Q6K3D4	N-Term(iTRAQ8plex); K9(iTRAQ8plex)	16.18	0.966767	1	0.95552	1	1.0485	1	1.07327	1	1.058	1	0.956325	1	3	1697.96	-4.08339
aQmEAEFQR	Q01HT5	N-Term(iTRAQ8plex); M3(Oxidation)	22.12	1.06578	2	1.10025	2	1.14398	2	0.870842	2	0.939383	2	0.946855	2	2	1429.7	-2.38844
aQMEAEFQR	Q01HT5	N-Term(iTRAQ8plex)	14.96	1.00387	7	0.957794	7	0.942282	7	0.950302	7	0.989343	7	0.932076	7	2	1413.7	-4.45814
aQNEVAk	Q7XII4	N-Term(iTRAQ8plex); K7(iTRAQ8plex)	21.92	1.01392	1	1.05485	1	1.01277	1	0.81787	1	0.759756	1	0.980917	1	3	1367.81	1.32007
aQNFPIFSDGLFTSTGQk	B8B1X6	N-Term(iTRAQ8plex); K18(iTRAQ8plex)	5.86	1.29128	1	0.967588	1	1.06085	1	1.07974	1	0.949265	1	0.831755	1	3	2566.36	-7.28824
aQPASDALAk	Q7X6D9	N-Term(iTRAQ8plex); K10(iTRAQ8plex)	25.37	0.869058	2	0.864417	2	0.876246	2	1.01396	2	1.05436	2	0.943811	2	2	1579.92	-2.91835
aQPTLGLITAR	A3BP16	N-Term(iTRAQ8plex)	31.4	0.990334	2	1.01878	2	1.0467	2	1.02594	2	1.06798	2	1.04483	2	2	1444.88	-2.53279
aQPVNVPIYDFk	B9G4G0	N-Term(iTRAQ8plex); K12(iTRAQ8plex)	28.1	0.949341	1	0.832699	1	0.773729	1	0.751159	1	0.926059	1	0.817723	1	2	1999.14	-3.49896
aQQDEASDQPEHA	Q10NQ2	N-Term(iTRAQ8plex)	41.62	0.689679	2	0.771157	2	1.25716	2	0.601344	2	0.731068	2	0.768179	2	3	1729.79	0.43132
aQQGSLQGSk	Q5JN27	N-Term(iTRAQ8plex); K10(iTRAQ8plex)	32.18	0.986798	3	0.86708	3	0.890739	3	1.0417	3	1.13719	3	0.977698	3	2	1611.92	-3.28463
aQQGSMQGGHEFk	B8AP14	N-Term(iTRAQ8plex); K13(iTRAQ8plex)	21.53	0.987884	1	1.21796	1	1.19663	1	1.00722	1	0.995349	1	1.01275	1	3	2013.04	-0.4922
aQQGSmQGGHEFk	B8AP14	N-Term(iTRAQ8plex); M6(Oxidation); K13(iTRAQ8plex)	18.93	0.877035	1	1.21416	1	1.04519	1	0.955646	1	0.781799	1	0.96848	1	3	2029.03	-3.87806
aQQILSEEALk	Q6YW62	N-Term(iTRAQ8plex); K11(iTRAQ8plex)	40.09	0.849033	2	0.799673	2	0.847673	2	1.06672	2	1.00687	2	0.986401	2	2	1838.09	3.00314
aQSSIVVHER	A2YD35	N-Term(iTRAQ8plex)	31.56	1.0012	1	1.47847	1	1.25519	1	0.963267	1	0.943296	1	1.12409	1	3	1429.8	-2.11978
aQTIDELHSLQR	A2XEP1	N-Term(iTRAQ8plex)	22.85	1.11413	3	1.44486	3	1.34911	3	1.08441	3	0.92725	3	1.06078	3	3	1714.94	1.64747
aQVGPTPALIk	B8ARA0	N-Term(iTRAQ8plex); K11(iTRAQ8plex)	21.64	1.07596	2	1.0635	2	1.07216	2	1.00539	2	1.06491	2	1.04245	2	3	1703.06	-1.82848
aQVIAHPQIIEAQR	B9FYD7	N-Term(iTRAQ8plex)	17.75	1.09963	1	1.36964	1	1.47934	1	1.24769	1	1.0806	1	1.09645	1	3	1878.08	-1.81643
aQVSEVk	Q69WS1;Q2QLJ6	N-Term(iTRAQ8plex); K7(iTRAQ8plex)	24.64													3	1368.83	-2.5929
aQYNLLEPSSTDGR	Q94GW8	N-Term(iTRAQ8plex)	27.92	0.838772	1	1.00533	1	0.958908	1	1.13808	1	1.20736	1	1.18714	1	2	1854.95	1.41295
aREEDVGGTVVR	Q6ESV8	N-Term(iTRAQ8plex)	9.53	1.26407	1	1.76584	1	1.44479	1	1.09821	1	1.01823	1	1.32373	1	3	1591.87	-1.73337
aRLADELEk		N-Term(iTRAQ8plex); K9(iTRAQ8plex)	10.66													3	1652.97	-2.81907
aSAAGTTk	Q6ETD9	N-Term(iTRAQ8plex); K8(iTRAQ8plex)	28.08	0.916618	1	0.80968	1	0.918313	1	1.31408	1	1.12485	1	1.0515	1	2	1314.78	-4.4659
aSAALPEAVAPk	Q6ZFM7	N-Term(iTRAQ8plex); K12(iTRAQ8plex)	45.47	1.16314	4	1.15871	4	1.20688	4	0.742676	4	0.728789	4	0.784739	4	3	1733.04	-1.48443
aSAEVLGk	A2YPZ9;Q6L569;Q94DU4;Q8H811;B9FJS7;B9FB64;Q0JPG8;B8ABJ9	N-Term(iTRAQ8plex); K8(iTRAQ8plex)	34.45													2	1382.84	-4.94357
aSALESSLk	B9FDE6	N-Term(iTRAQ8plex); K9(iTRAQ8plex)	23.26	0.960331	1	1.17577	1	0.939925	1	1.02413	1	1.12505	1	1.03692	1	2	1513.9	-3.15307
aSALLVEFFEk	A2XHR1	N-Term(iTRAQ8plex); K11(iTRAQ8plex)	23.31	0.96126	4	0.910045	4	0.901	4	0.973204	4	1.00986	4	0.947436	4	3	1862.09	-0.299226
aSAQALAR	A2YLE3	N-Term(iTRAQ8plex)	13.95	1.15885	1	1.17095	1	1.38697	1	0.783256	1	0.802348	1	0.914678	1	2	1091.65	-1.54056
aScGNSFAPFPk	Q10D21	N-Term(iTRAQ8plex); C3(Carbamidomethyl); K12(iTRAQ8plex)	44.58	0.935967	1	1.02891	1	0.883702	1	1.05893	1	1.0269	1	0.949844	1	2	1890.99	-2.3621
aScISFk	Q8H8T0	N-Term(iTRAQ8plex); C3(Carbamidomethyl); K7(iTRAQ8plex)	27.06	0.907697	1	0.938325	1	0.862861	1	1.02953	1	0.986159	1	0.894568	1	2	1420.8	-4.344
aScLLGSDEAcR	A2ZM45	N-Term(iTRAQ8plex); C3(Carbamidomethyl); C11(Carbamidomethyl)	17.01	1.01269	1	0.949481	1	1.07445	1	0.690686	1	0.763545	1	0.741714	1	2	1642.78	-1.09065
aSDAFYR	Q6ZIV7	N-Term(iTRAQ8plex)	13.4	0.982839	3	0.888465	3	0.798521	3	0.957966	3	0.943915	3	0.946141	3	2	1133.59	-2.58471
aSDDGNYDALVDPR	A2WMB0	N-Term(iTRAQ8plex)	113.82	1.22091	4	1.22624	4	1.28441	4	0.876383	4	0.926882	4	0.855647	4	2	1811.87	-0.463776
aSDFDSLGSDGGPGPVR	Q0DKW1	N-Term(iTRAQ8plex)	34.36	1.16057	2	1.09626	2	1.31845	2	1.17509	2	1.03244	2	1.19055	2	3	1937.95	-1.41394
aSDGLTAPFSAFLDAAAAAGNk	B9F0T2	N-Term(iTRAQ8plex); K22(iTRAQ8plex)	41.88	1.06858	20	1.17938	20	1.06914	20	0.897742	20	1.03627	20	0.854511	20	3	2674.42	-2.15633
aSDQYLPPFVIVDESGk	B8ABA7	N-Term(iTRAQ8plex); K17(iTRAQ8plex)	48.34	1.027	37	0.94809	37	1.00881	37	0.91673	37	0.924588	37	0.890681	37	3	2473.34	-1.89258
aSDVQMEQFNL	Q6ZD72	N-Term(iTRAQ8plex)	26.91	1.00947	1	1.04623	1	1.41771	1	1.00798	1	1.04992	1	1.1477	1	2	1585.78	-4.86761
aSDWSVVDSGTGk	B9EYD6	N-Term(iTRAQ8plex); K13(iTRAQ8plex)	57.22	0.849653	1	0.837423	1	0.802666	1	0.868525	1	1.103	1	0.896384	1	2	1917.01	-4.41446
aSDYLEk	Q6YS11	N-Term(iTRAQ8plex); K7(iTRAQ8plex)	31.95	0.880346	1	0.914432	1	0.863896	1	1.00841	1	0.942418	1	0.938151	1	2	1433.8	-3.83355
aSEADAAAR	Q10FJ2	N-Term(iTRAQ8plex)	27.28	0.910217	1	1.05223	1	0.996136	1	0.869648	1	0.998364	1	0.966668	1	2	1165.61	-1.78336
aSEAFHATPPTSR	Q7XKI9	N-Term(iTRAQ8plex)	12.49	1.34427	1	1.61359	1	1.44333	1	1.12786	1	0.91855	1	1.10111	1	3	1675.86	-5.34942
aSEEQGEAVAPTSLR	Q0DUV5	N-Term(iTRAQ8plex)	23.09	1.07903	1	1.03689	1	1.5898	1	1.12277	1	1.38487	1	1.14564	1	2	1848.96	-1.47111
aSEEVPDPDVIk	A2XUF3	N-Term(iTRAQ8plex); K12(iTRAQ8plex)	23.1	0.913931	1	0.825489	1	0.828011	1	1.04974	1	1.05654	1	1.05579	1	3	1907.07	5.39273
aSELPPGVTSHk	B9F2B8	N-Term(iTRAQ8plex); K12(iTRAQ8plex)	12.63	0.931527	1	1.16624	1	1.0151	1	0.919719	1	0.745842	1	0.805215	1	3	1831.05	-1.61225
aSENEYEMALQDR	A2Y116	N-Term(iTRAQ8plex)	43.83	0.9674	1	0.850914	1	0.964896	1	0.900822	1	0.88094	1	0.916111	1	2	1859.87	-4.69222
aSFFAPSPETYAR	Q7XQF8	N-Term(iTRAQ8plex)	6.96	0.889492	1	0.99018	1	0.996077	1	1.20268	1	1.06801	1	1.33522	1	2	1747.89	-1.352
aSFPGVLDk	A2WX79	N-Term(iTRAQ8plex); K9(iTRAQ8plex)	23.07	0.868337	1	0.826266	1	0.816105	1	0.967708	1	1.06467	1	0.999707	1	3	1541.91	-4.24411
aSFPTTEVR	B8B7B1	N-Term(iTRAQ8plex)	8.09	0.815058	1	0.865575	1	1.32752	1	1.16982	1	1.04353	1	1.37545	1	2	1311.72	-2.54806
aSGAGDkDSESQR	Q5TKG0	N-Term(iTRAQ8plex); K7(iTRAQ8plex)	14.03	0.838815	1	0.952403	1	0.851809	1	1.41418	1	0.866723	1	0.844405	1	3	1915.99	-2.73238
aSGcNVLLIQk	Q6YUK5	N-Term(iTRAQ8plex); C4(Carbamidomethyl); K11(iTRAQ8plex)	33.34	0.903693	1	0.795723	1	0.79531	1	0.877439	1	0.978037	1	0.844384	1	2	1811.07	1.07669
aSGDYAIVISHNPDNGTSR	Q2QNF3	N-Term(iTRAQ8plex)	6.31	1.18119	1	1.24577	1	1.13055	1	0.895815	1	1.00983	1	1.11879	1	3	2278.13	-4.77838
aSGHAAAk		N-Term(iTRAQ8plex); K8(iTRAQ8plex)	7.97													3	1320.78	-0.988878
aSGPATPPDISDk	A2WNX6	N-Term(iTRAQ8plex); K13(iTRAQ8plex)	17.21	0.934586	1	0.91813	1	0.869073	1	1.03141	1	0.989284	1	1.09298	1	3	1864.02	-1.31268
aSGPLPDPPNDEYDk	Q9LX04	N-Term(iTRAQ8plex); K15(iTRAQ8plex)	60.42	0.832799	2	0.770445	2	0.774641	2	1.03915	2	1.07896	2	0.992153	2	2	2223.14	1.19104
aSGTENDEIQSGVVTR	Q84QV5	N-Term(iTRAQ8plex)	56.93	1.02747	2	1.27472	2	1.21189	2	1.06178	2	1.04393	2	1.11335	2	3	1966.99	-2.04038
aSHGTSLk	Q69V45	N-Term(iTRAQ8plex); K8(iTRAQ8plex)	27.69	0.926096	1	1.19453	1	1.19743	1	1.0024	1	0.878208	1	1.00484	1	3	1408.83	-4.38641
aSHPNDEER	Q8RZJ2	N-Term(iTRAQ8plex)	8.62	0.985481	1	1.36942	1	1.11038	1	0.919824	1	1.68585	1	1.06881	1	3	1358.66	-1.35533
aSHPNYEIETR	A2WNV9	N-Term(iTRAQ8plex)	32.91	1.04051	2	1.23869	2	1.09001	2	1.06774	2	0.973208	2	1.04891	2	3	1620.83	-0.34449
aSIPQALHDPNHLFTR	B8B0N6;A1XFD9	N-Term(iTRAQ8plex)	0.45													4	2121.15	-2.39055
aSkPGLFGSR	Q10L56	N-Term(iTRAQ8plex); K3(iTRAQ8plex)	14.95	0.961656	4	1.05004	4	0.93244	4	1.00889	4	0.940738	4	0.943442	4	4	1627.97	-3.53132
aSLEGSAPVPIHk	Q2QX92	N-Term(iTRAQ8plex); K13(iTRAQ8plex)	7.92	1.1656	1	1.36762	1	1.23692	1	0.996758	1	1.0242	1	0.996341	1	3	1914.13	-0.980682
aSLGLTEEEk	Q945W2	N-Term(iTRAQ8plex); K10(iTRAQ8plex)	25.95	1.12644	2	1.00932	2	1.01059	2	0.992605	2	0.987456	2	0.928537	2	2	1684.95	-2.22214
aSLGYNQR	A2YXF9	N-Term(iTRAQ8plex)	8	0.894632	1	0.784503	1	0.753997	1	0.901588	1	0.869027	1	0.911399	1	2	1212.66	-2.99956
aSLNDFDR	Q6K1Q6	N-Term(iTRAQ8plex)	13.01	0.957366	2	0.878095	2	0.894448	2	0.962094	2	1.02025	2	0.984072	2	2	1241.64	-4.06591
aSLNTLTSEVQR	Q6H590	N-Term(iTRAQ8plex)	14.45	1.30278	1	1.30897	1	1.27903	1	1.1046	1	1.16901	1	1.30092	1	3	1622.91	2.21404
aSLPHTNEYQR	Q6K5C7	N-Term(iTRAQ8plex)	12.37	0.968386	1	1.28842	1	1.06002	1	0.976266	1	0.935261	1	1.05641	1	3	1619.84	-0.337778
aSLQAAEETGR	B8AHE2	N-Term(iTRAQ8plex)	36.58	1.01416	1	0.966448	1	1.01475	1	0.925722	1	0.96808	1	0.954167	1	2	1436.76	-2.47453
aSLSEYcEk	Q5ZED1	N-Term(iTRAQ8plex); C7(Carbamidomethyl); K9(iTRAQ8plex)	40.82	0.835161	2	0.781565	2	0.806085	2	0.951916	2	1.02857	2	1.05156	2	2	1694.88	-2.79016
aSLTGSTEVGDVEAVcR	A2X8Y4	N-Term(iTRAQ8plex); C16(Carbamidomethyl)	49.56	1.01197	1	1.11247	1	1.03538	1	1.10017	1	1.16655	1	1.03799	1	3	2055.03	-2.37658
aSLVLEDAVR	B8A9Z2;A3AGN3	N-Term(iTRAQ8plex)	14.47													2	1376.8	-0.90114
aSLVNDVDDVEk	A3ABR0	N-Term(iTRAQ8plex); K12(iTRAQ8plex)	38.84	1	1	0.916306	1	0.960166	1	0.895525	1	1.06996	1	1.01862	1	2	1912.06	5.67995
aSMEDFYETR	Q67UX7;Q7XR06	N-Term(iTRAQ8plex)	16.9													2	1552.73	0.13802
aSmGGYISSQTVR	B7EJR0	N-Term(iTRAQ8plex); M3(Oxidation)	25.2	1.17135	3	1.37154	3	1.5369	3	1.08654	3	1.05213	3	1.21633	3	3	1676.85	-3.53782
aSMGGYISSQTVR	B7EJR0	N-Term(iTRAQ8plex)	10.76	1.00299	2	1.00341	2	1.20619	2	0.912441	2	0.969205	2	1.14817	2	2	1660.87	4.87699
aSMSAAQEEEEAR	B8B1E4	N-Term(iTRAQ8plex)	36.89	1.59287	2	1.60384	2	1.44597	2	0.820742	2	0.775493	2	0.878617	2	3	1712.8	-3.04806
aSNAHEFISSLPQGYDTTVGER	A2WU37	N-Term(iTRAQ8plex)	17.01	1.09771	1	1.2388	1	1.07133	1	0.851955	1	1.05801	1	0.890174	1	3	2683.32	-3.41903
aSNILLDAEMNPk	B8BE62	N-Term(iTRAQ8plex); K13(iTRAQ8plex)	8.54	0.883281	1	0.893005	1	0.933327	1	0.891108	1	0.992935	1	0.92075	1	3	2024.13	-2.3124
aSNILLDANMNPk	B9FXP5;B8B6Z1	N-Term(iTRAQ8plex); K13(iTRAQ8plex)	45.88													2	2009.13	0.246885
aSNILLDFk	Q0DJW8	N-Term(iTRAQ8plex); K9(iTRAQ8plex)	33.81	0.911822	19	0.913332	19	0.908708	19	1.19402	19	1.27093	19	1.1804	19	2	1628.98	-1.49223
aSNILLDk	B9FXT7;Q69W20;Q653V5;Q69SQ5;B8AI85;Q7XTU1;B8BEP4;Q69SG8	N-Term(iTRAQ8plex); K8(iTRAQ8plex)	7.11													3	1481.91	-1.01128
aSNILLDSk	B9ETW6;Q5JN27;B8AZB0	N-Term(iTRAQ8plex); K9(iTRAQ8plex)	29.8													2	1568.94	-3.79734
aSNPFVNLk	Q8H8T0	N-Term(iTRAQ8plex); K9(iTRAQ8plex)	40.02	0.923533	4	0.882614	4	0.88618	4	1.05744	4	1.0156	4	0.939761	4	2	1597.95	-4.44655
aSNTLSIIDSGIGMTk	A2YWQ1	N-Term(iTRAQ8plex); K16(iTRAQ8plex)	36.06	0.965542	4	0.856737	4	0.902089	4	0.896627	4	0.982507	4	0.955587	4	3	2216.24	-2.46413
aSNTLSIIDSGVGMTk	A2Z2G1	N-Term(iTRAQ8plex); K16(iTRAQ8plex)	72.13	1.00279	8	0.852047	8	0.876018	8	0.895562	8	0.952919	8	0.924544	8	3	2202.22	-3.21677
aSNVISHTR	B9FXY9	N-Term(iTRAQ8plex)	19.87	1.17734	1	1.89204	1	2.2983	1	1.24973	1	1.10039	1	1.63149	1	3	1288.72	-4.49861
aSNVLLDANLNPk	B8AU76;B9FCI1;A2XXK2	N-Term(iTRAQ8plex); K13(iTRAQ8plex)	68.74													2	1977.16	-0.349277
aSNVLLDANMNPk	Q7X8H4	N-Term(iTRAQ8plex); K13(iTRAQ8plex)	50.2	1.03585	2	0.976655	2	1.007	2	0.886983	2	0.932834	2	0.862588	2	2	1995.1	-7.63172
aSNVLLDEAMSAk	A3C6H0	N-Term(iTRAQ8plex); K13(iTRAQ8plex)	17.68	0.989366	1	0.934083	1	0.897907	1	1.03305	1	1.13572	1	1.02596	1	2	1957.05	-18.1217
aSNVLLDEQLNPk	B9EZB1	N-Term(iTRAQ8plex); K13(iTRAQ8plex)	56.79	0.988945	2	0.836892	2	0.860835	2	0.940573	2	0.952104	2	0.951535	2	3	2049.18	-1.21311
aSNVLLDGDMSGR	A2ZLX9	N-Term(iTRAQ8plex)	33.42	0.924119	1	0.90152	1	0.860116	1	0.903223	1	0.958155	1	0.870279	1	2	1638.84	-1.19088
aSNVLLDGDmSGR	A2ZLX9	N-Term(iTRAQ8plex); M10(Oxidation)	33.01	0.930035	1	0.92715	1	1.02503	1	0.842632	1	0.959222	1	1.07984	1	2	1654.83	-2.45875
aSNVLLDTDLTPk	Q0DJL9;B9FJP3;B9FNJ0;B8BBP9;B8BBQ1	N-Term(iTRAQ8plex); K13(iTRAQ8plex)	75.73													2	1995.16	-0.377413
aSPScVSNLER	B9FYX5	N-Term(iTRAQ8plex); C5(Carbamidomethyl)	37.63	0.942617	2	1.06198	2	1.04836	2	1.01161	2	1.00228	2	1.05384	2	2	1523.77	-3.12237
aSPTcISNLEk	B9F9X1	N-Term(iTRAQ8plex); C5(Carbamidomethyl); K11(iTRAQ8plex)	40.76	0.951683	1	0.82024	1	0.731552	1	0.807383	1	0.893633	1	0.755709	1	2	1828.01	-1.42328
aSPYPGQDSLQR	B8BMN4	N-Term(iTRAQ8plex)	17.59	1.14132	1	1.63152	1	1.53843	1	0.969715	1	1.07534	1	1.42509	1	3	1622.84	0.198521
aSQALAEcLTAMQSLk	A2Y727	N-Term(iTRAQ8plex); C8(Carbamidomethyl); K16(iTRAQ8plex)	44.88	1.01048	6	0.907703	6	0.875873	6	0.908708	6	0.963165	6	0.90123	6	3	2330.26	-4.73888
aSQcLPSTSTR	A2YWY6	N-Term(iTRAQ8plex); C4(Carbamidomethyl)	33.6	0.891889	1	1.34732	1	0.962521	1	1.07949	1	1.04315	1	1.31708	1	2	1511.77	-3.22128
aSQLLEHTk	Q8S6N5	N-Term(iTRAQ8plex); K9(iTRAQ8plex)	40.08	0.974282	6	0.95077	6	0.881387	6	0.976509	6	0.942426	6	0.958208	6	3	1634.96	-3.09253
aSQMVk	Q5XQQ5	N-Term(iTRAQ8plex); K6(iTRAQ8plex)	5.54	1.01961	1	0.915522	1	0.887057	1	1.1276	1	1.17536	1	1.09854	1	2	1271.75	-4.22484
aSSALENVQLDR	B8BLR7	N-Term(iTRAQ8plex)	32.45	1.12091	1	1.05135	1	1.0331	1	0.9204	1	0.992508	1	0.913113	1	2	1606.87	-0.0476166
aSSFSLAEAk	Q7XJX6	N-Term(iTRAQ8plex); K10(iTRAQ8plex)	61.65	0.951187	8	0.899447	8	0.919206	8	1.01746	8	1.01896	8	0.980567	8	2	1618.92	-3.76907
aSSGDLDNTNIISQILk	Q6K9T1	N-Term(iTRAQ8plex); K17(iTRAQ8plex)	38.18	0.959554	3	1.00791	3	1.01199	3	0.928145	3	1.02905	3	0.95425	3	3	2397.34	-0.536189
aSSGENSSSDTSESPGEETR	A2ZM45	N-Term(iTRAQ8plex)	63.7	1.09623	1	2.13891	1	0.737458	1			0.694603	1	0.871359	1	3	2318.02	0.816523
aSSGITMLQR	Q5N747	N-Term(iTRAQ8plex)	24.49	1.01384	5	0.845399	5	0.942204	5	0.990368	5	0.956317	5	1.01242	5	2	1367.76	-3.64667
aSSQSTVcR	Q0DD57	N-Term(iTRAQ8plex); C8(Carbamidomethyl)	11.18	1.1699	1	1.04774	1	0.936408	1	0.600456	1	0.638083	1	0.745458	1	2	1299.66	-1.85996
aSSSSSSSAPLTAGQR	Q5N7Y7	N-Term(iTRAQ8plex)	43.2	1.5106	1	2.0264	1	1.44924	1	1.16831	1	0.814873	1	1.46691	1	3	1797.91	-5.49323
aSSSSSSTTDAk	A2ZUM2	N-Term(iTRAQ8plex); K12(iTRAQ8plex)	21.52	0.597299	1	1.13928	1	0.62041	1	1.14521	1	1.12484	1	1.20884	1	3	1736.91	-3.79266
aSSSVLRPVDAR	Q6ZJ22;B8BEL1	N-Term(iTRAQ8plex)	6.96													2	1561.9	-0.385268
aSSVFIPHGPGAVR	Q6L4S3	N-Term(iTRAQ8plex)	58.58	1.03176	81	1.14437	81	1.09516	81	1.02733	81	0.9372	81	0.991574	81	3	1698.96	2.54031
aSTAGGSGGFSGGGGSNMLR	Q2QYX6	N-Term(iTRAQ8plex)	77.9	0.969677	2	0.962955	2	1.02957	2	0.948099	2	1.07055	2	1.02697	2	3	2031.98	-1.11754
aSTAGGSGGFSGGGGSNmLR	Q2QYX6	N-Term(iTRAQ8plex); M18(Oxidation)	53.59	1.03138	1	1.1366	1	1.19085	1	1.05756	1	0.994688	1	1.17713	1	3	2047.97	-1.60614
aSTEEGEAEVSkPGSR	Q8S3S1	N-Term(iTRAQ8plex); K12(iTRAQ8plex)	18.41	1.11519	1	1.31241	1	0.854753	1	1.3255	1	0.93845	1	1.1278	1	3	2242.16	-6.46628
aSTLDDNQGLGcIALQYIk	B8BBB2	N-Term(iTRAQ8plex); C12(Carbamidomethyl); K19(iTRAQ8plex)	91.81	0.901268	71	0.835499	71	0.856445	71	1.03981	71	1.02731	71	1.01313	71	3	2688.44	-1.41937
aSTPMFLMAR	B8ALL8	N-Term(iTRAQ8plex)	24.45	0.522837	1	0.506988	1	0.490326	1	1.3782	1	1.56472	1	1.39868	1	2	1428.76	-1.84977
aSTSADFVTk	Q53PH6	N-Term(iTRAQ8plex); K10(iTRAQ8plex)	19.52	0.863484	1	0.761202	1	0.810832	1	1.0029	1	1.14975	1	0.898455	1	2	1634.92	-2.11218
aSTVEPLLR	B8ADP2	N-Term(iTRAQ8plex)	5.8	1.10147	1	1.25405	1	1.44002	1	0.913228	1	0.879222	1	1.14518	1	2	1289.78	2.20597
aSVASYTNDSSGAESSPR	Q6Z5P1	N-Term(iTRAQ8plex)	76.4	0.747149	2	0.567592	2	0.635522	2	1.11824	2	1.00549	2	1.06519	2	2	2089.99	-0.377819
aSVAVSQNYDQGk	B5UBC0	N-Term(iTRAQ8plex); K13(iTRAQ8plex)	58.35	0.944168	1	1.00523	1	0.94673	1	1.06856	1	1.09477	1	1.05299	1	3	1975.07	-2.17969
aSVDEFVk	Q9AS12	N-Term(iTRAQ8plex); K8(iTRAQ8plex)	35.01	0.898014	1	0.831138	1	0.829024	1	0.972697	1	1.0488	1	0.920463	1	2	1502.86	-4.39419
aSVGFk	P0C510	N-Term(iTRAQ8plex); K6(iTRAQ8plex)	20.46	1.8938	1	2.60556	1	1.42708	1	2.30367	1	0.848837	1	0.897606	1	2	1216.75	-2.48112
aSVIQALk	A2X229	N-Term(iTRAQ8plex); K8(iTRAQ8plex)	22.45	0.993278	1	0.970234	1	0.87086	1	0.89733	1	0.954746	1	0.85093	1	3	1437.92	-0.962637
aSVVWDQEAGR	Q6ZJ22;B8BEL1	N-Term(iTRAQ8plex)	25.96													2	1521.8	0.375411
aSYENIHk	Q6Z7L8	N-Term(iTRAQ8plex); K8(iTRAQ8plex)	1.25	0.894259	1	1.01548	1	0.895232	1	0.905748	1	0.808162	1	0.897839	1	3	1569.89	1.07797
aSYGASSFQSGSDk	Q0DCQ3	N-Term(iTRAQ8plex); K14(iTRAQ8plex)	23.5	0.956133	1	0.965382	1	0.877882	1	0.956552	1	1.06803	1	0.970594	1	3	2000.01	-3.37229
aTAAQQYDSSPFLSGLk	Q53PH6	N-Term(iTRAQ8plex); K17(iTRAQ8plex)	52	0.90023	1	0.881995	1	0.955972	1	0.981419	1	1.03396	1	0.987754	1	3	2392.31	4.7529
aTADDAVLLR	Q75LJ9	N-Term(iTRAQ8plex)	31.6	1.01915	5	0.8052	5	1.06256	5	0.867346	5	0.819216	5	1.02525	5	2	1348.77	-3.50744
aTAENVDDAVR	Q9ST27	N-Term(iTRAQ8plex)	36.75	1.06902	6	1.29083	6	1.34364	6	1.10878	6	0.959487	6	1.03382	6	2	1464.76	-2.7093
aTAFHSLLPAVR	B9FB57	N-Term(iTRAQ8plex)	16.94	1.14357	12	1.26139	12	1.21423	12	1.03296	12	0.960264	12	1.12613	12	3	1586.93	-2.42955
aTAGDTHLGGEDFDNR	Q943K7;Q10NA9;Q84TA1;Q6L509;Q53NM9	N-Term(iTRAQ8plex)	87.39													2	1979.93	-1.55576
aTAGFSEER	A2X1X5	N-Term(iTRAQ8plex)	27.56	1.0511	1	1.03692	1	1.05718	1	0.959891	1	0.964928	1	0.995569	1	2	1271.65	-2.87461
aTAPVDADDGcGVPHPSPRETk	B9G156	N-Term(iTRAQ8plex); C11(Carbamidomethyl); K22(iTRAQ8plex)	0.29	0.635393	3	0.533782	3	0.401242	3	0.915178	3	0.863079	3	0.501108	3	2	2885.47	0.0199119
aTASHGADVIR	Q2QNK2	N-Term(iTRAQ8plex)	38.43	1.04599	1	1.55012	1	1.58976	1	1.07138	1	0.996316	1	1.43684	1	3	1401.77	-4.81144
aTAVLPTILSPLGk	B8BIC9	N-Term(iTRAQ8plex); K14(iTRAQ8plex)	47.18	0.867717	20	0.803367	20	0.856734	20	1.02423	20	1.05488	20	1.06476	20	3	1989.25	-1.56541
aTcTINYGSELPLAQGINFG	A2Z1P2	N-Term(iTRAQ8plex); C3(Carbamidomethyl)	14.47	0.991185	3	1.01254	3	1.2905	3	0.857885	3	0.894991	3	1.0539	3	3	2430.22	-3.00104
aTcYPSFMDk	Q5Z790	N-Term(iTRAQ8plex); C3(Carbamidomethyl); K10(iTRAQ8plex)	18.77	0.985513	1	1.07026	1	0.883019	1	1.08198	1	1.15378	1	1.03415	1	3	1827.92	-2.68686
aTDDFNQINk	B8AXL2	N-Term(iTRAQ8plex); K10(iTRAQ8plex)	19.22	0.858123	1	0.825244	1	0.728859	1	0.72798	1	0.73643	1	0.605818	1	2	1773.95	-6.47249
aTDVMIAGk	Q84VE1	N-Term(iTRAQ8plex); K9(iTRAQ8plex)	44.03	1.01985	6	0.897538	6	0.898902	6	0.848071	6	0.764511	6	0.822473	6	2	1513.88	-4.09442
aTDVmIAGk	Q84VE1	N-Term(iTRAQ8plex); M5(Oxidation); K9(iTRAQ8plex)	11.45	1.52353	1	2.26051	1	1.87796	1	1.36253	1	0.871679	1	1.15997	1	3	1529.88	-1.37493
aTEDASGSSSSk	A3AX85	N-Term(iTRAQ8plex); K12(iTRAQ8plex)	33.32	0.913285	1	0.95475	1	0.974273	1	0.842928	1	0.844231	1	0.896254	1	3	1734.89	-3.78842
aTEELDR	A3BQ30	N-Term(iTRAQ8plex)	13.5	0.911203	1	0.920951	1	0.966322	1	1.07494	1	1.10534	1	1.08147	1	2	1137.6	-4.88947
aTELGFFGF	A3BXT8	N-Term(iTRAQ8plex)	35.31	1.05117	2	0.953072	2	1.03712	2	1.12392	2	1.22469	2	1.21179	2	2	1292.68	0.0291076
aTEPHAcLNNFTN	J7H3S8	N-Term(iTRAQ8plex); C7(Carbamidomethyl)	43.94	0.822527	2	1.07173	2	1.25104	2	1.08232	2	0.900439	2	1.15768	2	2	1792.86	-2.15587
aTEQDLDLR	Q2QQX3	N-Term(iTRAQ8plex)	10.16	1.20299	1	1.06546	1	1.2318	1	0.81339	1	0.889159	1	1.31684	1	2	1364.73	-3.66284
aTETALVLAGR	A2X5N7	N-Term(iTRAQ8plex)	16.42	0.97972	1	1.08006	1	1.14695	1	1.05911	1	1.06775	1	1.05863	1	2	1405.83	-0.404753
aTEVNGTQQNPASVQR	A2Y8U6	N-Term(iTRAQ8plex)	23.05	1.11642	1	1.59895	1	1.50865	1	1.19186	1	1.012	1	1.05389	1	3	2004.04	-2.67935
aTFDcLMk	Q84M35	N-Term(iTRAQ8plex); C5(Carbamidomethyl); K8(iTRAQ8plex)	38.22	0.847591	2	0.811895	2	0.817309	2	1.00029	2	0.99061	2	0.911411	2	2	1593.85	-3.28763
aTFDcLmk	Q84M35	N-Term(iTRAQ8plex); C5(Carbamidomethyl); M7(Oxidation); K8(iTRAQ8plex)	24.62	0.866878	1	0.848399	1	0.780479	1	0.991867	1	0.979357	1	0.850608	1	2	1609.85	-1.68865
aTFDNPEYDk	Q7XRT0	N-Term(iTRAQ8plex); K10(iTRAQ8plex)	31.09	0.868453	2	0.797886	2	0.802877	2	1.00829	2	1.06448	2	0.937919	2	2	1807.93	-2.0105
aTFDNVGR	A2Y6J2	N-Term(iTRAQ8plex)	13.49	0.803398	1	0.787766	1	0.835164	1	1.13401	1	1.1719	1	1.17591	1	2	1183.63	-3.14183
aTGAAPGIFR	P93844	N-Term(iTRAQ8plex)	27.23	1.06168	1	1.03424	1	0.994288	1	0.891392	1	1.06419	1	1.02886	1	3	1264.73	-2.06747
aTGcAEFDAk	B8B118	N-Term(iTRAQ8plex); C4(Carbamidomethyl); K10(iTRAQ8plex)	39.26	1.02239	1	0.813673	1	0.923014	1	0.889312	1	0.908516	1	0.878529	1	2	1677.87	-3.96391
aTGGELLLk	A3C6X2	N-Term(iTRAQ8plex); K9(iTRAQ8plex)	24.81	1.00962	1	0.901682	1	1.00047	1	0.892041	1	0.834647	1	0.782765	1	3	1509.95	2.84827
aTGHAPk	Q7XMK5	N-Term(iTRAQ8plex); K7(iTRAQ8plex)	19.76	1.00818	13	1.34006	13	1.01981	13	1.23901	13	0.979501	13	1.04121	13	2	1289.77	-4.25068
aTGLAIk	Q10M12	N-Term(iTRAQ8plex); K7(iTRAQ8plex)	19.31	0.85732	2	0.875248	2	0.77039	2	1.00568	2	1.04284	2	0.976201	2	2	1281.83	-4.13611
aTGNPHGLTPLQR	B7EHA8	N-Term(iTRAQ8plex)	43.9	1.41023	5	1.63075	5	1.47568	5	1.12914	5	0.689384	5	0.834342	5	3	1665.93	-2.65607
aTGQSNPALPPYk	B9GCD1	N-Term(iTRAQ8plex); K13(iTRAQ8plex)	51.38	0.950934	8	0.926188	8	0.892308	8	1.10616	8	1.08252	8	1.06239	8	2	1952.1	-2.2689
aTGQSNPALPPyk	B9GCD1	N-Term(iTRAQ8plex); Y12(iTRAQ8plex); K13(iTRAQ8plex)	15.56	0.895236	2	0.942865	2	0.831751	2	1.02204	2	0.949115	2	0.924609	2	4	2256.31	-2.42446
aTIDmGLAHR	Q10P12	N-Term(iTRAQ8plex); M5(Oxidation)	39.07	1.47555	1	2.00079	1	1.68848	1	1.25403	1	1.18018	1	1.34062	1	3	1404.76	-1.37723
aTIDMGLAHR	Q10P12	N-Term(iTRAQ8plex)	33.2	1.49156	3	1.54469	3	1.46068	3	1.35176	3	0.941476	3	1.07687	3	3	1388.76	-2.17595
aTIEIGLAHR	B8BG04	N-Term(iTRAQ8plex)	24.72	0.961262	41	1.03317	41	0.95033	41	1.05059	41	0.95315	41	0.965008	41	3	1384.82	0.979734
aTIGADFLTk	B8AZZ6;Q5N7Z9	N-Term(iTRAQ8plex); K10(iTRAQ8plex)	32.28													2	1644.97	-3.58409
aTIGADFVTk	Q5JLU1	N-Term(iTRAQ8plex); K10(iTRAQ8plex)	50.54	0.836518	1	0.792088	1	0.747732	1	1.00442	1	0.963555	1	0.97478	1	3	1630.96	-1.54954
aTLAQLGFEk	Q69RJ0	N-Term(iTRAQ8plex); K10(iTRAQ8plex)	23.95	0.964274	1	0.848296	1	0.843354	1	0.958701	1	1.00131	1	0.964159	1	3	1686.01	0.368846
aTLcIHPDk	B8BMD4	N-Term(iTRAQ8plex); C4(Carbamidomethyl); K9(iTRAQ8plex)	9.69	1.0349	1	1.23864	1	1.10252	1	1.19656	1	1.1674	1	1.2233	1	3	1662.94	-1.23672
aTLDTDGVFR	B9FDN8	N-Term(iTRAQ8plex)	9.64	1.15872	1	1.15946	1	1.18071	1	0.827658	1	0.821848	1	0.808549	1	2	1398.75	-1.99432
aTLNFDQSNk	Q653V5	N-Term(iTRAQ8plex); K10(iTRAQ8plex)	29.37	0.909499	1	0.804592	1	0.838638	1	1.0324	1	0.954995	1	1.04255	1	2	1745.97	2.60961
aTLPATAHGAIPR	Q84KJ7	N-Term(iTRAQ8plex)	52.49	1.27498	8	1.40207	8	1.27329	8	1.25567	8	0.846312	8	0.956783	8	3	1579.92	0.227378
aTLPDGSFLAIk	Q0ITI9	N-Term(iTRAQ8plex); K12(iTRAQ8plex)	44.31	0.936199	3	1.08155	3	0.918907	3	0.908511	3	0.972584	3	0.885227	3	3	1841.1	-0.709208
aTLQDNAQR	B8ARB3	N-Term(iTRAQ8plex)	26.75	1.11014	1	0.9926	1	1.20735	1	0.826615	1	0.963182	1	0.983519	1	2	1320.72	-1.40045
aTNEFck	Q6AUA1	N-Term(iTRAQ8plex); C6(Carbamidomethyl); K7(iTRAQ8plex)	9.33	0.93315	1	0.798225	1	0.792702	1	0.919794	1	0.964762	1	0.903425	1	2	1477.79	-3.57971
aTNEMLNYMR	Q8GU64	N-Term(iTRAQ8plex)	22.77	0.909418	1	0.881712	1	0.88274	1	0.927666	1	1.01843	1	1.00071	1	2	1546.77	-0.587712
aTNHVEcPPk	Q0DG77;A3BEA5	N-Term(iTRAQ8plex); C7(Carbamidomethyl); K10(iTRAQ8plex)	19.52													3	1760.95	-3.9943
aTNIDDVDk	Q0J328	N-Term(iTRAQ8plex); K9(iTRAQ8plex)	44.85	1.04719	1	0.869984	1	0.79058	1	0.942826	1	1.02509	1	0.853823	1	2	1598.88	-4.52465
aTNPTLAPAHLQDLPGFTR	Q7F1K9	N-Term(iTRAQ8plex)	72.12	1.19228	12	1.141	12	1.1618	12	1.02468	12	0.917632	12	1.01813	12	3	2324.26	-2.38435
aTPALAAR	Q259N9;Q7XR60	N-Term(iTRAQ8plex)	23.53													3	1074.65	-3.40729
aTPAPPVGPALGAk	Q9AYT6	N-Term(iTRAQ8plex); K14(iTRAQ8plex)	69.99	1.00916	1	0.901984	1	1.04563	1	1.03864	1	0.994282	1	1.03266	1	3	1855.12	-3.52443
aTPEQVSDYTLk	Q53P96	N-Term(iTRAQ8plex); K12(iTRAQ8plex)	41.5	0.888651	3	0.855759	3	0.845038	3	0.949133	3	1.02417	3	0.934852	3	2	1960.08	-2.79584
aTPPSTPPPVR	Q60EJ0	N-Term(iTRAQ8plex)	22.8	1.09068	1	1.3931	1	1.70186	1	0.967461	1	1.10528	1	1.41879	1	3	1423.82	-2.09467
aTPTFFFIk	Q0DKF1;Q9AS75	N-Term(iTRAQ8plex); K9(iTRAQ8plex)	16.07													3	1679.99	-3.46943
aTPVLEELTk	A2Z9W7	N-Term(iTRAQ8plex); K10(iTRAQ8plex)	12.09	1.04035	2	0.965343	2	0.930695	2	0.956388	2	1.03218	2	0.972604	2	3	1709.03	-1.02958
aTQAIELAR	B9G7R8	N-Term(iTRAQ8plex)	22.22	1.36942	1	1.15752	1	1.24678	1	0.773018	1	0.760897	1	0.844569	1	2	1276.75	-2.25404
aTQGESIR	Q8RU48	N-Term(iTRAQ8plex)	17.67	0.91447	1	0.98376	1	0.961816	1	1.13958	1	1.11766	1	1.1028	1	2	1165.64	-3.45292
aTQNFSPSFk	A3BW58	N-Term(iTRAQ8plex); K10(iTRAQ8plex)	51.16	0.984125	2	0.906581	2	0.809171	2	0.926451	2	1.03915	2	0.958662	2	2	1734.96	-0.400669
aTQVEk	B8A790	N-Term(iTRAQ8plex); K6(iTRAQ8plex)	19.45	0.705608	1	0.733883	1	0.694276	1	0.96395	1	1.00778	1	0.917092	1	2	1283.77	-4.22408
aTQVPDQTR	A2WJQ6	N-Term(iTRAQ8plex)	25.1	1.1864	1	1.1193	1	1.07609	1	0.710096	1	0.681463	1	0.678239	1	2	1319.72	-2.41084
aTSAWGLEVR	B8ALL8	N-Term(iTRAQ8plex)	10.79	0.682217	2	0.63943	2	0.590386	2	1.09234	2	1.19012	2	1.15129	2	2	1393.77	-1.61656
aTSGIQEAAPNTDSR	Q6H8D7	N-Term(iTRAQ8plex)	57.84	1.06113	2	1.43016	2	1.48523	2	0.945006	2	0.858388	2	0.974948	2	2	1821.92	-2.53793
aTSHDDEPAEER	Q10NB4	N-Term(iTRAQ8plex)	66.66	0.914768	2	1.60912	2	0.471981	2	0.969163	2	0.951949	2	0.748305	2	3	1660.77	-1.40299
aTSHEDAPAEDR	B9FKB1	N-Term(iTRAQ8plex)	12.27	2.04459	1	1.40465	1	1.17455	1	0.98104	1	0.541468	1	0.51297	1	3	1602.76	-1.42389
aTSQASQAGSGGLGR	Q10N98	N-Term(iTRAQ8plex)	49.91	0.764254	2	0.977561	2	0.958205	2	0.832074	2	0.873413	2	1.04701	2	3	1651.86	-1.78024
aTSSIFPLQNVFVR	P49397	N-Term(iTRAQ8plex)	43.04	1.03581	23	1.01847	23	1.02768	23	1.06711	23	1.04984	23	1.09735	23	3	1883.07	1.34365
aTSVGEk	Q84TA1;Q53NM9	N-Term(iTRAQ8plex); K7(iTRAQ8plex)	25.42													2	1299.77	-1.8603
aTTETVDALR	Q0J328	N-Term(iTRAQ8plex)	29.41	1.14187	2	1.2952	2	1.39554	2	1.00548	2	0.989265	2	1.12713	2	2	1380.76	-2.59563
aTTFENVk	Q75LE2	N-Term(iTRAQ8plex); K8(iTRAQ8plex)	28.28	0.991437	1	0.882417	1	0.820864	1	1.05428	1	1.07615	1	1.01011	1	2	1517.87	-3.3222
aTTIADIPR	B8A8N0	N-Term(iTRAQ8plex)	27.17	1.23788	3	1.21896	3	1.31689	3	0.828118	3	0.796228	3	0.854689	3	2	1261.74	-3.607
aTTIAIVR	Q7XAN4	N-Term(iTRAQ8plex)	51.88	1.03733	2	1.14695	2	1.08248	2	0.940308	2	0.924469	2	1.00137	2	3	1148.73	-2.5847
aTTILASIPGR	Q338N8	N-Term(iTRAQ8plex)	28.02	1.13636	6	1.15901	6	1.37645	6	1.05319	6	1.0237	6	1.03858	6	2	1403.85	-2.21572
aTTMTPFEVAHGcTR	A2Z4K2	N-Term(iTRAQ8plex); C13(Carbamidomethyl)	17.46	1.13572	1	1.30743	1	1.24822	1	1.0875	1	0.978892	1	1.00188	1	3	1982.96	-4.97053
aTTPFDGQkPGTSGLR	Q9AUQ4	N-Term(iTRAQ8plex); K9(iTRAQ8plex)	3.87	1.2756	2	1.40057	2	1.0607	2	1.15637	2	0.860746	2	0.819029	2	3	2241.24	-0.583564
aTVADVVAAVk	Q10FT0	N-Term(iTRAQ8plex); K11(iTRAQ8plex)	40.96	0.955263	1	0.885281	1	0.832876	1	0.883512	1	1.0433	1	1.05087	1	2	1652.02	-2.96174
aTVAEFLSk	B9FY47	N-Term(iTRAQ8plex); K9(iTRAQ8plex)	22.91	0.904954	2	0.652926	2	0.619084	2	0.901209	2	0.837185	2	0.833988	2	2	1573.94	-2.42063
aTVDYEk	B9EW46	N-Term(iTRAQ8plex); K7(iTRAQ8plex)	26.84	0.945038	1	0.852218	1	0.77354	1	0.841942	1	0.823537	1	0.754854	1	2	1433.81	-2.64162
aTVPLNADVYDSPQDQQVPSAGR	Q0DMU8	N-Term(iTRAQ8plex)	30.49	1.28857	1	1.12085	1	1.40014	1	0.97214	1	1.07921	1	1.06822	1	3	2732.37	-3.12863
aTVPLNADVYESTVPSAGR	Q69LE4	N-Term(iTRAQ8plex)	102.85	1.09533	6	1.19436	6	1.21242	6	0.958621	6	1.04577	6	1.04242	6	2	2251.19	2.08815
aTVPLNADVyESTVPSAGR	Q69LE4	N-Term(iTRAQ8plex); Y10(iTRAQ8plex)	8.2	1.05673	1	0.783936	1	0.836543	1	0.823105	1	0.857571	1	0.735581	1	3	2555.4	3.65866
aTVSASALGVDPTTAATDIk	A2ZQ91	N-Term(iTRAQ8plex); K20(iTRAQ8plex)	64.37	0.953974	2	0.82521	2	1.05019	2	0.950665	2	1.01053	2	0.926733	2	3	2497.39	-3.21139
aTVSISQLSAR	Q2R4L1	N-Term(iTRAQ8plex)	18.22	1.14073	2	1.28945	2	1.28663	2	0.969979	2	0.877602	2	0.98921	2	2	1436.83	-1.88394
aTVTPDSEk	Q6Z3C2	N-Term(iTRAQ8plex); K9(iTRAQ8plex)	26.16	0.730974	1	0.728406	1	0.723635	1	1.16767	1	1.22849	1	1.10566	1	3	1555.87	-4.44829
aTVVALNAEIR	Q6I633	N-Term(iTRAQ8plex)	24.85	0.9183	61	0.837587	61	0.880831	61	0.926095	61	0.98743	61	0.940223	61	3	1460.87	-0.666299
aTYTLAGDGAVk	Q6Z9F9	N-Term(iTRAQ8plex); K12(iTRAQ8plex)	68.93	0.849205	7	0.748557	7	0.785682	7	0.994578	7	1.00929	7	0.934701	7	2	1775.01	-4.69595
aVAAAVk	Q6K4P5	N-Term(iTRAQ8plex); K7(iTRAQ8plex)	29.94	0.908197	2	0.900117	2	0.869632	2	1.01041	2	1.04315	2	1.01313	2	2	1237.81	-1.74751
aVADAYSk	B8AL50	N-Term(iTRAQ8plex); K8(iTRAQ8plex)	13.3	0.873977	1	0.847898	1	0.846675	1	0.927365	1	0.883705	1	0.869267	1	2	1432.82	-2.72778
aVADSGAk	C6F1N7	N-Term(iTRAQ8plex); K8(iTRAQ8plex)	31.62	0.974667	2	0.867777	2	1.5698	2	0.978113	2	1.05665	2	1.09719	2	2	1326.78	-4.98508
aVADVSAAR	Q7XK44	N-Term(iTRAQ8plex)	11.99	1.06333	1	1.05108	1	1.07379	1	1.01747	1	1.01454	1	1.01368	1	2	1163.67	-2.9326
aVAGAGVLAGYDk	Q0DJC0	N-Term(iTRAQ8plex); K13(iTRAQ8plex)	56.47	0.95254	1	0.838244	1	0.788044	1	1.05836	1	1.19701	1	1.01947	1	2	1800.05	0.436734
aVAGDTSGDYER	A2YAT3	N-Term(iTRAQ8plex)	56.36	1.01584	5	0.998544	5	1.13368	5	1.01106	5	0.909453	5	1.1953	5	3	1544.75	-1.28217
aVAHLAVQcTSPQPR	Q10KZ7	N-Term(iTRAQ8plex); C9(Carbamidomethyl)	25.35	1.29024	2	1.70409	2	1.40856	2	1.30149	2	0.957701	2	1.10673	2	3	1939.04	-2.99454
aVAHLIER	Q2R315	N-Term(iTRAQ8plex)	18.92	1.02107	8	1.07747	8	0.990281	8	1.04549	8	1.00033	8	0.991109	8	3	1212.73	-4.24813
aVALHDR	Q6Z3Y9	N-Term(iTRAQ8plex)	3.04	1.07255	13	1.69917	13	1.19507	13	1.10564	13	0.958821	13	1.20262	13	3	1085.64	-0.876772
aVALLGQGESEEAk	B9F767	N-Term(iTRAQ8plex); K14(iTRAQ8plex)	61.81	0.879228	3	0.811072	3	0.862869	3	0.962904	3	1.00087	3	1.01732	3	2	2010.13	0.818708
aVALQVVER	B8BPF4	N-Term(iTRAQ8plex)	14.04	1.20449	2	1.30948	2	1.36705	2	1.04755	2	1.02629	2	1.14769	2	2	1288.79	2.87161
aVALVLPNLk	Q7X8A1	N-Term(iTRAQ8plex); K10(iTRAQ8plex)	34.93	0.874851	9	0.761129	9	0.764479	9	1.00166	9	1.03359	9	0.95855	9	2	1646.08	-2.93849
aVANQPVSVAIEAGGR	B8AVK3	N-Term(iTRAQ8plex)	58.25	1.22427	6	1.21905	6	1.07064	6	1.18483	6	0.9912	6	1.11842	6	2	1843.03	-1.65484
aVANSTSATFLR	P46466	N-Term(iTRAQ8plex)	30.77	1.01297	2	0.989332	2	1.104	2	0.90445	2	0.943413	2	0.975014	2	2	1541.86	-1.27126
aVASANk	Q108Y0;Q688W0	N-Term(iTRAQ8plex); K7(iTRAQ8plex)	18.92													2	1268.77	-3.19504
aVATDDAHk	Q75M17	N-Term(iTRAQ8plex); K9(iTRAQ8plex)	42.55	0.757428	2	0.773259	2	0.719545	2	1.18003	2	1.1843	2	1.0987	2	3	1535.86	-2.89947
aVAVLASSEGVk	P28757	N-Term(iTRAQ8plex); K12(iTRAQ8plex)	36.48	0.991613	2	0.923503	2	0.848716	2	0.883451	2	0.889909	2	0.820545	2	2	1739.05	-0.173513
aVAVVIDPIQSVk	A2Y3X5	N-Term(iTRAQ8plex); K13(iTRAQ8plex)	23.81	1.03018	2	0.930637	2	0.942454	2	0.90156	2	1.02847	2	0.992928	2	3	1947.21	-1.93684
aVDAELIk	Q6YY64	N-Term(iTRAQ8plex); K8(iTRAQ8plex)	39.74	0.928973	6	1.04459	6	0.949285	6	1.06059	6	0.822453	6	0.843911	6	2	1466.9	-0.84928
aVDDGADVIDcPVQLTk	Q01J03	N-Term(iTRAQ8plex); C11(Carbamidomethyl); K17(iTRAQ8plex)	90.34	0.771867	7	0.776218	7	0.723069	7	1.0584	7	1.07154	7	1.02689	7	2	2424.29	-1.92936
aVDDGVNTYk	C6F1N7	N-Term(iTRAQ8plex); K10(iTRAQ8plex)	40.49	1.11573	1	0.899028	1	0.993489	1	1.14837	1	1.0627	1	0.945107	1	2	1689.93	-0.713991
aVDEIEPALk	O80384	N-Term(iTRAQ8plex); K10(iTRAQ8plex)	40.18	0.921869	2	0.862898	2	0.838598	2	1.06057	2	1.08278	2	0.999136	2	2	1693	-0.755403
aVDFIHR	A2Y9G0	N-Term(iTRAQ8plex)	10.86	1.02666	1	1.17999	1	1.04698	1	1.06183	1	1.03772	1	1.12087	1	3	1161.67	-0.783617
aVDGIFHVLR	B8BBN7	N-Term(iTRAQ8plex)	5.08	1.06058	5	1.08575	5	1.09473	5	0.975397	5	1.035	5	1.01117	5	3	1430.84	-3.86366
aVDGSYVFSk	Q0DJB7	N-Term(iTRAQ8plex); K10(iTRAQ8plex)	34.05	0.94427	3	0.814232	3	0.822538	3	0.925376	3	0.952873	3	0.916804	3	2	1680.94	-2.25915
aVDITYIR	B9G623	N-Term(iTRAQ8plex)	3.76	0.937263	1	0.987581	1	1.24674	1	0.934662	1	0.891412	1	0.917881	1	2	1254.73	-1.70479
aVDNSGTVVGIk	Q9LSU0;Q6F321	N-Term(iTRAQ8plex); K12(iTRAQ8plex)	32.53													2	1768.04	-3.99501
aVDNVNSVIAPALIGk	Q42971	N-Term(iTRAQ8plex); K16(iTRAQ8plex)	76.23	0.970676	19	0.895079	19	0.909079	19	0.941171	19	0.932487	19	0.944222	19	2	2189.31	-1.27892
aVDTISScLk	Q2RAK2	N-Term(iTRAQ8plex); C8(Carbamidomethyl); K10(iTRAQ8plex)	9.49	0.982467	6	0.984062	6	1.01723	6	0.97766	6	1.03779	6	1.00967	6	2	1701.97	-0.18871
aVDVTAPGGGALTGGSRPSGGGDR	Q84UR8	N-Term(iTRAQ8plex)	12.32	0.949151	2	0.991397	2	3.53514	2	1.22518	2	1.01701	2	0.754113	2	3	2416.25	-0.96243
aVDVTGPDGSFVk	Q6YUR8	N-Term(iTRAQ8plex); K13(iTRAQ8plex)	56.38	0.914012	3	0.872182	3	0.88394	3	0.915586	3	0.893334	3	0.816203	3	3	1900.06	-1.06979
aVEAHGNDFR	Q5W6F1	N-Term(iTRAQ8plex)	43.08	1.05063	5	1.23339	5	1.11277	5	0.990248	5	0.911556	5	0.94261	5	3	1419.73	-0.893073
aVEDDNER	Q8GU86	N-Term(iTRAQ8plex)	10.23	0.851786	1	0.848652	1	0.808435	1	0.823894	1	0.877279	1	0.835046	1	2	1251.61	-1.28971
aVEDELEk	Q6L4S3;Q6ZIV7	N-Term(iTRAQ8plex); K8(iTRAQ8plex)	36.92													2	1540.86	-2.48564
aVEDENPEDFIDPDTPHGQk	Q851K9	N-Term(iTRAQ8plex); K20(iTRAQ8plex)	13.04	1.30245	1	1.36232	1	1.27778	1	1.01485	1	0.887581	1	1.06162	1	3	2861.4	-2.99987
aVEDTYFR	B8ARA0	N-Term(iTRAQ8plex)	5.79	0.971656	1	0.920308	1	0.961019	1	0.967679	1	1.00618	1	0.92565	1	2	1304.68	-1.08497
aVEEEGWAQQAR	Q10N00	N-Term(iTRAQ8plex)	14.39	1.21621	2	1.27197	2	1.39519	2	1.16459	2	1.05665	2	1.28734	2	3	1677.85	0.821969
aVELLGLR	Q2QRA2	N-Term(iTRAQ8plex)	11.52	1.0442	2	1.00965	2	1.00795	2	0.905518	2	0.827182	2	1.01814	2	3	1174.75	-0.375097
aVENSPFLEk	A2Z2G1;A2YWQ1	N-Term(iTRAQ8plex); K10(iTRAQ8plex)	43.4													2	1741.99	-1.22511
aVEQAQQQVR	B9EVX0	N-Term(iTRAQ8plex)	18.53	0.947854	1	0.823039	1	0.889156	1	1.11012	1	1.03355	1	1.0794	1	2	1460.81	-2.1013
aVETEAPVMVk	Q94EG1	N-Term(iTRAQ8plex); K11(iTRAQ8plex)	38.37	1.00133	1	0.977294	1	1.04049	1	0.912958	1	1.0005	1	0.921978	1	3	1782.02	-2.41626
aVETGGcPHAAIR	E0ZS47	N-Term(iTRAQ8plex); C7(Carbamidomethyl)	28.76	1.06814	1	1.43413	1	1.04967	1	0.862077	1	0.780524	1	1.04169	1	2	1642.86	-1.05866
aVEVEAEEk	Q5TKJ2	N-Term(iTRAQ8plex); K9(iTRAQ8plex)	46.78	1.03866	7	0.94314	7	0.906943	7	1.06272	7	0.998818	7	1.00612	7	2	1611.9	-3.29146
aVEVLHAmAIPIELSDR	Q6YUK5	N-Term(iTRAQ8plex); M8(Oxidation)	17.23	1.02879	1	0.98091	1	0.781369	1	0.966972	1	1.1058	1	1.03892	1	3	2184.19	-4.84803
aVFASGSPFDPVEYDGk	Q0JJQ7	N-Term(iTRAQ8plex); K17(iTRAQ8plex)	75.24	1.06897	52	0.96466	52	1.01698	52	0.890734	52	0.911612	52	0.858336	52	2	2394.24	0.463338
aVFASGSPFDPVEYNGk	P43279	N-Term(iTRAQ8plex); K17(iTRAQ8plex)	13.45	0.933254	2	0.869462	2	0.988155	2	0.913951	2	0.972916	2	0.854793	2	3	2393.24	-7.23934
aVFDSLk	B8AER9	N-Term(iTRAQ8plex); K7(iTRAQ8plex)	13.42	0.873516	2	0.876863	2	0.87712	2	1.04932	2	1.00885	2	0.98164	2	2	1387.84	-2.84317
aVFGEIYPDPVR	B9G7S6	N-Term(iTRAQ8plex)	23.61	1.00701	1	0.915261	1	1.08009	1	0.846945	1	0.916221	1	1.00157	1	2	1666.91	-2.24569
aVFIPVHR	C7J4B4	N-Term(iTRAQ8plex)	7.5	0.853788	1	0.996668	1	0.69699	1	0.800435	1	0.450916	1	0.466634	1	3	1242.76	-2.89482
aVFPSIVGRPR	A2XNS1;P0C539;Q65XH8;Q67G20;A2XLF2;A2ZID5;Q75HX0;P0C542	N-Term(iTRAQ8plex)	12.84													3	1502.91	-2.40171
aVFVDLEPTVIDEVR	Q0PVB1;Q10DN0	N-Term(iTRAQ8plex)	37.81													3	2006.11	-0.938724
aVGAAAAVAAR	Q0D519	N-Term(iTRAQ8plex)	42.55	1.36232	2	1.82047	2	1.88293	2	1.13788	2	1.06822	2	1.32133	2	3	1231.74	-0.351334
aVGAPLTLR	Q5JLP6	N-Term(iTRAQ8plex)	36.19	1.25775	2	1.36618	2	1.58051	2	1.0987	2	1.35254	2	1.49059	2	3	1201.76	0.847904
aVGccSR	B9F8Y4	N-Term(iTRAQ8plex); C4(Carbamidomethyl); C5(Carbamidomethyl)	12.5	0.935462	1	0.89773	1	1.04951	1	0.89568	1	1.20814	1	1.06902	1	2	1113.54	-2.69027
aVGEDNAHR	B8B260	N-Term(iTRAQ8plex)	15.28	1.54009	1	2.70544	1	1.44317	1	1.27614	1	0.75251	1	0.947299	1	3	1272.66	-2.77108
aVGHGDMPIIVGEVGWPTDGDk	Q69LE4	N-Term(iTRAQ8plex); K22(iTRAQ8plex)	21.37	0.947575	5	1.12576	5	1.0968	5	0.957707	5	1.00053	5	1.06086	5	4	2858.49	-3.44312
aVGNVLAHPVVVSTAEk	Q60EL7	N-Term(iTRAQ8plex); K17(iTRAQ8plex)	16.62	1.1199	4	1.07441	4	1.05417	4	0.947453	4	0.910252	4	0.893165	4	4	2299.35	-2.20083
aVGSAENNTVPSEATTER	B9FB57	N-Term(iTRAQ8plex)	33.28	0.738582	1	0.934634	1	0.59464	1	0.860873	1	0.965264	1	0.891399	1	3	2137.07	-0.191623
aVGVNLPGGGAASSAAAAAPAAk	P29545	N-Term(iTRAQ8plex); K23(iTRAQ8plex)	129.8	0.942929	2	1.51225	2	1.3415	2	1.26848	2	1.30554	2	1.26772	2	2	2487.41	-0.761565
aVHLEPVPFDmDR	B8A7L3;B8A6V4	N-Term(iTRAQ8plex); M11(Oxidation)	34.2													3	1845.94	-2.95337
aVHLEPVPFDMDR	B8A7L3;B8A6V4	N-Term(iTRAQ8plex)	12.22													3	1829.95	-0.721576
aVHPIALAk	Q8S3J6	N-Term(iTRAQ8plex); K9(iTRAQ8plex)	18.96	1.2194	2	1.44561	2	1.07676	2	1.28003	2	0.905877	2	0.977485	2	3	1527.98	-2.7987
aVIcGISYk	Q108Y0	N-Term(iTRAQ8plex); C4(Carbamidomethyl); K9(iTRAQ8plex)	24.21	1.06607	1	1.10446	1	1.07609	1	1.10179	1	1.13619	1	1.0351	1	2	1618.94	-3.42866
aVIIANPR	B9FHX2	N-Term(iTRAQ8plex)	12.95	1.17692	2	1.31896	2	1.37665	2	1.04007	2	0.762119	2	1.0111	2	2	1157.73	-1.95044
aVILLQGR	Q7XC31;Q6K4T1	N-Term(iTRAQ8plex)	17.11													2	1173.76	-2.48639
aVIPAPAPPAEEEkPPVDDSk	Q7XMK5	N-Term(iTRAQ8plex); K14(iTRAQ8plex); K21(iTRAQ8plex)	22.6	1.0971	5	1.07485	5	1.01038	5	1.02956	5	0.956366	5	0.907098	5	3	3069.72	-2.50375
aVkPVLVGGPk	B9F7T1	N-Term(iTRAQ8plex); K3(iTRAQ8plex); K11(iTRAQ8plex)	6.52	0.895719	2	0.952773	2	0.735371	2	0.943808	2	0.845194	2	0.757679	2	3	1977.29	-4.06956
aVLAVADLER	A3BCS7	N-Term(iTRAQ8plex)	39.34	1.04995	1	1.02571	1	1.3789	1	1.08476	1	0.990705	1	1.10172	1	3	1360.81	-2.12789
aVLDNTk	Q84P96	N-Term(iTRAQ8plex); K7(iTRAQ8plex)	18.2	0.764643	1	0.68898	1	0.65946	1	1.1088	1	1.15377	1	1.07451	1	2	1368.82	-4.79026
aVLEDATTVVVk	Q0JPG8	N-Term(iTRAQ8plex); K12(iTRAQ8plex)	11.82													3	1853.12	-0.94155
aVLEEGTTVVVk	B8ABJ9	N-Term(iTRAQ8plex); K12(iTRAQ8plex)	28.86	0.962273	65	0.983134	65	0.909206	65	1.00151	65	1.01252	65	0.950983	65	3	1853.12	-1.13917
aVLFVPk	A2YWQ1	N-Term(iTRAQ8plex); K7(iTRAQ8plex)	14.33	0.911928	1	1.03512	1	0.935049	1	0.994167	1	1.02966	1	1.01245	1	2	1381.89	-7.15065
aVLHDEVEAAR	Q2QPR0	N-Term(iTRAQ8plex)	40.63	1.01097	27	1.0485	27	0.974911	27	1.02288	27	0.979913	27	0.999306	27	2	1513.83	-1.51029
aVLMDLEPGTMDSVR	Q43594;P45960;Q76FS3;Q8H7U1;Q40665;A3ANA0	N-Term(iTRAQ8plex)	53.96													3	1938	-0.332696
aVLMDLEPGTmDSVR	Q43594;P45960;Q76FS3;Q8H7U1;Q40665;A3ANA0	N-Term(iTRAQ8plex); M11(Oxidation)	36.19													3	1953.99	-2.16314
aVLPDGQVVAVk	A3BW58	N-Term(iTRAQ8plex); K12(iTRAQ8plex)	47.62	0.953129	6	0.894265	6	0.925587	6	0.977539	6	0.998782	6	0.994953	6	2	1804.11	-1.69673
aVLPDGSFLAVk	Q6AUA1	N-Term(iTRAQ8plex); K12(iTRAQ8plex)	33.89	0.989037	4	0.981179	4	0.973647	4	1.04961	4	1.11358	4	0.976414	4	2	1825.1	-2.05894
aVLPDNAELIEYGk	Q945W2	N-Term(iTRAQ8plex); K14(iTRAQ8plex)	59.36	0.988096	4	0.90834	4	0.902775	4	0.839877	4	0.858414	4	0.856204	4	2	2140.21	-1.62329
aVLQAITVYVMGIFkLPDSIcDELTk	A3CI90	N-Term(iTRAQ8plex); K15(iTRAQ8plex); C21(Carbamidomethyl); K26(iTRAQ8plex)	3.66	0.83669	1	0.58125	1	0.687006	1	0.573545	1	1.10157	1	0.360045	1	3	3837.18	2.5628
aVLQELEk	Q5VNU2	N-Term(iTRAQ8plex); K8(iTRAQ8plex)	34.3	0.913191	3	0.876716	3	0.738387	3	1.00657	3	1.05666	3	0.954537	3	2	1537.93	-4.2235
aVLSPEQFR	Q10L32	N-Term(iTRAQ8plex)	47.08	1.19795	2	1.21189	2	1.30926	2	0.858565	2	0.834676	2	0.879159	2	3	1350.77	-2.00084
aVLVQNEPR	B8A8N0;B9EX46	N-Term(iTRAQ8plex)	29.43													2	1329.78	-1.29186
aVmESGSAVAVk	Q8H811	N-Term(iTRAQ8plex); M3(Oxidation); K12(iTRAQ8plex)	71.23	0.677869	2	0.655035	2	0.705512	2	1.14239	2	1.0766	2	0.994907	2	2	1773	-1.43828
aVMESGSAVAVk	Q8H811	N-Term(iTRAQ8plex); K12(iTRAQ8plex)	68.98	0.852298	5	0.815805	5	0.762844	5	1.0687	5	1.16836	5	1.06964	5	2	1757.01	0.795746
aVNQVcGLEFSR	Q0JMW7	N-Term(iTRAQ8plex); C6(Carbamidomethyl)	16.6	0.984296	1	1.0007	1	1.04472	1	1.0112	1	0.972282	1	0.921414	1	2	1683.86	-9.83509
aVPGLDLPAR	B8BEL1	N-Term(iTRAQ8plex)	29.23	1.14072	1	2.01938	1	1.75827	1	1.1578	1	1.05251	1	1.41985	1	3	1312.79	0.778824
aVQDVLk		N-Term(iTRAQ8plex); K7(iTRAQ8plex)	7.39													2	1380.86	-3.52033
aVQEEDELPPEk	A2Y3X5	N-Term(iTRAQ8plex); K12(iTRAQ8plex)	32.36	0.888205	1	0.832536	1	0.92625	1	0.949531	1	1.04925	1	0.959876	1	3	1992.07	-3.4583
aVQGVEFSDPVAVR	B8AKM5	N-Term(iTRAQ8plex)	34.21	1.16704	2	1.16655	2	1.33782	2	1.0869	2	1.10831	2	1.25707	2	3	1777.97	-2.74096
aVQSDDVSLR	Q8H859	N-Term(iTRAQ8plex)	13.06	1.32222	3	1.36505	3	1.40386	3	0.935094	3	0.988492	3	0.985918	3	2	1393.75	-3.63014
aVQYDASGGGAAGLk	B9FER6	N-Term(iTRAQ8plex); K15(iTRAQ8plex)	41.31	0.914686	1	0.901669	1	1.07987	1	0.735099	1	0.922631	1	0.862414	1	2	1973.08	-5.64375
aVScLccPck	O49148	N-Term(iTRAQ8plex); C4(Carbamidomethyl); C6(Carbamidomethyl); C7(Carbamidomethyl); C9(Carbamidomethyl); K10(iTRAQ8plex)	48.28	0.90606	4	0.795451	4	0.90309	4	0.813418	4	1.02392	4	0.909333	4	2	1862.91	-4.31266
aVSDEIk	Q6ZL37	N-Term(iTRAQ8plex); K7(iTRAQ8plex)	15.38	0.920068	1	0.807629	1	0.728753	1	0.883278	1	0.924813	1	0.870642	1	2	1369.81	-5.68616
aVSEIEPALk	Q6H883	N-Term(iTRAQ8plex); K10(iTRAQ8plex)	29.94	0.971199	2	0.922325	2	0.930826	2	1.00503	2	1.00388	2	1.01877	2	3	1665	-2.50755
aVSEVEEk	Q0DNI8	N-Term(iTRAQ8plex); K8(iTRAQ8plex)	24.11	0.942721	2	0.847081	2	0.826767	2	0.916681	2	1.02151	2	0.928677	2	2	1498.85	-4.2176
aVSFLNNDck	B8ABB7	N-Term(iTRAQ8plex); C9(Carbamidomethyl); K10(iTRAQ8plex)	24.81	1.0341	1	0.929708	1	1.04243	1	1.03171	1	1.08027	1	0.927805	1	2	1775.95	-1.91132
aVSTEDAk	Q338Z5;Q6AUF8	N-Term(iTRAQ8plex); K8(iTRAQ8plex)	22.16													3	1428.81	-4.04938
aVSTLLGGGDGEAGR	Q6Z4B7	N-Term(iTRAQ8plex)	53.28	1.24609	8	1.28754	8	1.30201	8	0.862282	8	0.894208	8	0.827725	8	2	1663.88	-4.30452
aVSYEEGEQFAk	Q6YY17;Q7XQN5	N-Term(iTRAQ8plex); K12(iTRAQ8plex)	54.38													3	1966.03	-2.60593
aVTAEVESSPAATGk	Q01HW9	N-Term(iTRAQ8plex); K15(iTRAQ8plex)	76.32	1.08417	2	1.10672	2	0.948124	2	0.804057	2	0.801215	2	0.808442	2	2	2026.12	-2.64014
aVTcNYLR	Q6Z9J1	N-Term(iTRAQ8plex); C4(Carbamidomethyl)	13.09	0.972177	1	0.999382	1	1.04287	1	0.915651	1	0.95969	1	0.901588	1	2	1300.69	-4.95974
aVTDGADVIDcPVQVTk	Q6YY47	N-Term(iTRAQ8plex); C11(Carbamidomethyl); K17(iTRAQ8plex)	88.53	0.944695	7	0.861826	7	0.986738	7	1.02762	7	0.967187	7	1.05862	7	2	2396.29	-1.01536
aVTDNLGYYR	A2WNV9	N-Term(iTRAQ8plex)	30.51	1.0107	1	0.855056	1	0.895062	1	0.839131	1	0.784315	1	0.885798	1	2	1475.77	-3.73082
aVTEVFLk	B9FR59	N-Term(iTRAQ8plex); K8(iTRAQ8plex)	23.89	0.85127	2	0.72941	2	0.717895	2	0.91085	2	1.06326	2	0.879144	2	3	1514.94	-2.46494
aVTFTDLHTADGLk	P29545	N-Term(iTRAQ8plex); K14(iTRAQ8plex)	24.76	1.1097	24	1.28497	24	1.14816	24	1.04035	24	0.914839	24	0.988689	24	4	2097.18	-1.51189
aVTIPVMAk	Q69LA6	N-Term(iTRAQ8plex); K9(iTRAQ8plex)	29.49	1.01104	4	0.909714	4	0.940236	4	0.877105	4	0.969885	4	0.905184	4	2	1537.96	-1.34215
aVTSAYYR	P25766;Q652A2;Q338Z5;Q8LHP5	N-Term(iTRAQ8plex)	24.45													3	1234.67	-3.15394
aVTSFPANSPR	B9G6R1	N-Term(iTRAQ8plex)	11.96	1.33774	1	1.86677	1	2.22911	1	1.02086	1	1.0522	1	1.30158	1	3	1450.8	6.11124
aVTTSATADGIEEcR	A2Y8A0	N-Term(iTRAQ8plex); C14(Carbamidomethyl)	36.39	0.898808	1	1.02962	1	1.14033	1	1.07699	1	1.30416	1	1.13439	1	3	1884.93	-1.1285
aVVDEILPPVFLTR	Q0JCA4	N-Term(iTRAQ8plex)	19.91	0.902416	3	0.872926	3	1.00213	3	0.948463	3	1.02179	3	0.962192	3	3	1873.11	-0.858293
aVVDQLLHIVSk	Q33B25	N-Term(iTRAQ8plex); K12(iTRAQ8plex)	25.76	1.25707	6	1.12894	6	0.923193	6	1.0802	6	0.97409	6	0.962974	6	3	1930.19	-0.209469
aVVEAAVQR	Q6Z8B8	N-Term(iTRAQ8plex)	33.75	1.42031	1	1.71356	1	2.16117	1	1.17873	1	1.12413	1	1.67399	1	3	1246.74	-3.22403
aVVEAVAk		N-Term(iTRAQ8plex); K8(iTRAQ8plex)	4.08													3	1394.88	-3.65096
aVVHcQVk	Q8W315	N-Term(iTRAQ8plex); C5(Carbamidomethyl); K8(iTRAQ8plex)	15.31	1.609	1	2.22358	1	1.37414	1	1.84336	1	1.05915	1	1.01948	1	3	1548.91	-3.79561
aVVHcQVR	Q7XBZ9;A2Z4B1	N-Term(iTRAQ8plex); C5(Carbamidomethyl)	12.8													3	1272.71	-2.54007
aVVIHVPYR	Q10MS5	N-Term(iTRAQ8plex)	32.78	1.07395	51	1.16971	51	1.12297	51	0.995283	51	0.89696	51	0.96317	51	3	1357.82	-0.91598
aVVLEGLR	A2Z9B5;A2YCF0	N-Term(iTRAQ8plex)	3.17													2	1160.73	-1.45076
aVVLHSPILSGLR	B9FQ22	N-Term(iTRAQ8plex)	10.37	1.1493	9	1.1849	9	1.17271	9	1.16301	9	1.01729	9	0.950809	9	3	1666.03	0.110586
aVVPLPTPPATEHDDSk	Q10SU0	N-Term(iTRAQ8plex); K17(iTRAQ8plex)	60.14	0.981616	48	0.943568	48	0.897079	48	1.04254	48	1.00694	48	0.985045	48	3	2382.3	-3.39326
aVVQLLk	Q69LE4	N-Term(iTRAQ8plex); K7(iTRAQ8plex)	25.58	0.893642	1	0.727945	1	0.691383	1	0.926788	1	0.895702	1	0.857822	1	2	1378.92	-2.89914
aVVQVFEGTSGIDNk	Q93W07	N-Term(iTRAQ8plex); K15(iTRAQ8plex)	85.14	0.940308	75	0.87979	75	0.865928	75	0.989372	75	1.04401	75	0.95944	75	3	2172.21	-2.74441
aVVSAIGADR	Q6Z965	N-Term(iTRAQ8plex)	24.72	1.28805	1	1.43052	1	1.57689	1	1.18788	1	1.1205	1	1.29372	1	2	1262.74	-0.913776
aVVTPLYNTPWL	Q9LRE9	N-Term(iTRAQ8plex)	14.51	1.09609	1	1.09838	1	0.9737	1	0.898303	1	1.01411	1	1.08852	1	2	1677.96	2.8721
aVVVHADPDDLGk	A2XGP6;P28757	N-Term(iTRAQ8plex); K13(iTRAQ8plex)	59.96													2	1944.1	-2.68943
aVVVHADSDDLGR	Q0DTX5	N-Term(iTRAQ8plex)	15.6	1.3569	2	1.5774	2	1.37209	2	1.27987	2	0.91673	2	0.890312	2	3	1657.88	-1.62809
aVVVLGSSEIVk	A2XGP6	N-Term(iTRAQ8plex); K12(iTRAQ8plex)	18.49	0.931613	3	0.916796	3	0.931605	3	0.934943	3	1.00024	3	0.928487	3	3	1809.14	2.69182
aVYDGSLFAk	A3BAC7	N-Term(iTRAQ8plex); K10(iTRAQ8plex)	28.61	0.890438	3	0.831762	3	0.834669	3	0.983903	3	0.992891	3	0.959163	3	2	1678.96	-1.0914
aVYEELGk	Q6Z0D0	N-Term(iTRAQ8plex); K8(iTRAQ8plex)	11.95	0.962879	1	0.952972	1	0.850873	1	1.02446	1	1.01612	1	1.00968	1	2	1516.88	-2.6735
aWAGVTcDSAGR	P93425	N-Term(iTRAQ8plex); C7(Carbamidomethyl)	36.97	0.843648	1	0.727759	1	0.803605	1	0.992343	1	1.09216	1	1.09141	1	2	1554.76	-5.38907
aWDLAESDAVk	B9FM56	N-Term(iTRAQ8plex); K11(iTRAQ8plex)	41.86	1.09841	3	1.06571	3	1.19133	3	0.962507	3	0.976265	3	0.81703	3	2	1812.99	-3.20124
aWDLVLEQR	Q8L6I2;Q8L6I1;Q8L6I3	N-Term(iTRAQ8plex)	25.8													2	1433.8	-1.01034
aWDNLLENk	Q7XPY2	N-Term(iTRAQ8plex); K9(iTRAQ8plex)	52.38	0.928928	200	0.844478	200	0.853454	200	0.988239	200	1.01566	200	0.940379	200	2	1710.96	-3.69406
aWEENEk	Q337E7;Q7XMK5	N-Term(iTRAQ8plex); K7(iTRAQ8plex)	34.32													2	1513.81	-3.29609
aWEESEk	B8AF56	N-Term(iTRAQ8plex); K7(iTRAQ8plex)	25.79	1.02555	2	1.17593	2	1.0197	2	0.936026	2	0.958647	2	0.880787	2	2	1486.8	-2.42879
aWEVDTLR	A2YYM7;Q9AUR8	N-Term(iTRAQ8plex)	16.93													2	1293.71	-1.02593
aWSSLLR	Q2QQX3	N-Term(iTRAQ8plex)	25.7	0.946171	1	0.837182	1	0.890121	1	0.815255	1	1.01388	1	0.880213	1	3	1136.67	-0.898791
aWVDQDAVLR	Q5VME5	N-Term(iTRAQ8plex)	25.17	1.15854	1	1.13595	1	1.15622	1	0.786717	1	0.723895	1	0.705275	1	2	1476.81	-1.4502
aWVDQEEVLk	B8B0N6;A1XFD9	N-Term(iTRAQ8plex); K10(iTRAQ8plex)	55.31													2	1825.04	2.77112
aYADTAALSR	A2WX99	N-Term(iTRAQ8plex)	20.02	1.02952	3	1.02308	3	1.05971	3	1.05004	3	0.937192	3	1.04228	3	2	1342.73	-0.997847
aYADTYGEELLR	A2YAT3	N-Term(iTRAQ8plex)	21.34	0.943236	6	0.928282	6	0.949147	6	1.02112	6	1.05546	6	0.991977	6	2	1704.87	-1.3369
aYDAGELDALR	B9FHL4	N-Term(iTRAQ8plex)	9.66	0.936819	1	0.968748	1	1.03507	1	1.16446	1	1.13358	1	1.16987	1	2	1497.78	-5.23577
aYDVEGk	Q6YVF0	N-Term(iTRAQ8plex); K7(iTRAQ8plex)	12.25	1.0244	1	0.810733	1	0.791517	1	0.772435	1	0.740016	1	0.689334	1	2	1389.78	-3.27758
aYEGQcNQVGESk	B8BBB2	N-Term(iTRAQ8plex); C6(Carbamidomethyl); K13(iTRAQ8plex)	54	0.878625	7	0.893463	7	0.803982	7	1.10513	7	1.01257	7	0.990147	7	2	2078.04	-0.374021
aYEGVPPPYDR	Q75J18	N-Term(iTRAQ8plex)	28.76	0.951659	14	0.950487	14	0.98556	14	1.07086	14	1.08003	14	1.09457	14	2	1567.8	-2.17855
aYEGVPPPyDR	Q75J18	N-Term(iTRAQ8plex); Y9(iTRAQ8plex)	13.69	0.960326	1	0.967983	1	0.825262	1	1.06587	1	1.08566	1	0.918612	1	3	1872.01	-2.66698
aYELGLASR	Q0JJQ7;B9FMV0	N-Term(iTRAQ8plex)	20.23													2	1283.73	-0.189778
aYFEASALQk	Q259N9;Q7XR60	N-Term(iTRAQ8plex); K10(iTRAQ8plex)	9.45													3	1735.97	-8.85459
aYIDGEVFAVk	A2X8C2	N-Term(iTRAQ8plex); K11(iTRAQ8plex)	22.89	0.919547	17	0.853083	17	0.875539	17	0.99714	17	1.08793	17	0.998515	17	3	1820.04	1.29396
aYLPVGDLLSGEVVER	Q69X22	N-Term(iTRAQ8plex)	3.24	1.13557	1	1.12067	1	1.26672	1	1.04745	1	1.23527	1	1.26818	1	3	2021.12	-2.60542
aYLQATGQDGDVDMER	Q6Z3Y9	N-Term(iTRAQ8plex)	80.49	1.00695	17	0.964773	17	0.968727	17	1.04211	17	1.07696	17	1.00425	17	3	2072.98	-1.87624
ayLQATGQDGDVDMER	Q6Z3Y9	N-Term(iTRAQ8plex); Y2(iTRAQ8plex)	47.65	0.97106	4	0.962001	4	0.871175	4	0.993224	4	0.868353	4	0.922209	4	3	2377.18	-4.24524
aYLQATGQDGDVDmER	Q6Z3Y9	N-Term(iTRAQ8plex); M14(Oxidation)	37.76	0.940787	4	0.955072	4	0.988273	4	0.942817	4	1.04391	4	1.0777	4	3	2088.98	-2.08648
aYLVNGEEk	Q6ZFH9	N-Term(iTRAQ8plex); K9(iTRAQ8plex)	3.96	1.54131	1	2.06972	1	1.66241	1	1.48642	1	0.847715	1	1.08208	1	3	1630.9	-15.3824
aYPDAFVR	A6N1G6	N-Term(iTRAQ8plex)	7.46	1.00223	3	0.975111	3	0.942826	3	0.890067	3	0.940646	3	0.879903	3	2	1242.68	-1.21819
aYQALTDPVSR	A2XRR9	N-Term(iTRAQ8plex)	21.36	0.917683	1	0.889209	1	0.909298	1	1.05422	1	1.06141	1	1.03269	1	2	1524.84	2.68362
aYQEQVMSNcAk	B7E588	N-Term(iTRAQ8plex); C10(Carbamidomethyl); K12(iTRAQ8plex)	65.26	0.813174	2	0.7671	2	0.764688	2	1.14672	2	1.22849	2	1.13165	2	2	2037.03	-0.328778
aYSAALAVAQR	Q7EZL2	N-Term(iTRAQ8plex)	32.54	1.03069	3	1.15197	3	1.10787	3	1.092	3	1.0801	3	1.25137	3	3	1424.82	-0.851446
aYSAHLk	Q5KQL4	N-Term(iTRAQ8plex); K7(iTRAQ8plex)	17.44	0.91125	2	1.15754	2	1.03596	2	0.972969	2	0.902778	2	0.969309	2	3	1397.83	-0.85687
aYSDDEIIR	A2X9Q4	N-Term(iTRAQ8plex)	10.15	1.0016	1	0.98939	1	1.05885	1	0.975113	1	1.07544	1	0.95281	1	2	1385.71	-5.95284
aYSSGEVTPVQVAk	B9GC26	N-Term(iTRAQ8plex); K14(iTRAQ8plex)	62.42	0.867029	2	0.814944	2	0.825874	2	1.03161	2	0.992388	2	0.956687	2	2	2044.15	-2.57826
aYTDSPPEAATSEAATVAA	Q9LST6	N-Term(iTRAQ8plex)	66.67	1.61032	1	1.42387	1	1.57757	1	1.04188	1	1.03955	1	1.20717	1	2	2127.04	0.586629
aYVAGAAESk	Q688M9	N-Term(iTRAQ8plex); K10(iTRAQ8plex)	42.56	0.968712	2	0.979381	2	1.0146	2	0.863688	2	0.806357	2	0.792297	2	2	1574.89	-3.65785
aYVDQFSR	Q6K5K6;Q7XQF8	N-Term(iTRAQ8plex)	13.74													2	1289.67	-3.34116
aYVGNLPWQVDDSR	Q6ZJ15	N-Term(iTRAQ8plex)	39.43	0.90244	4	0.8504	4	0.859003	4	1.00736	4	1.161	4	1.11256	4	2	1923.98	-3.45286
aYVNLVk	C7J1V6	N-Term(iTRAQ8plex); K7(iTRAQ8plex)	28.49	0.972807	1	0.877822	1	0.893789	1	1.02787	1	1.04996	1	1.02071	1	2	1414.89	-1.2562
aYVPASkPVPVAAAR	A2ZUM2	N-Term(iTRAQ8plex); K7(iTRAQ8plex)	10.72	0.993272	2	1.26132	2	1.13211	2	1.23009	2	1.0815	2	1.14591	2	3	2105.26	-3.90064
aYVQEEVR	Q5TKN4	N-Term(iTRAQ8plex)	18.79	0.860708	2	0.847507	2	0.91198	2	1.01326	2	1.06371	2	1.12681	2	2	1297.7	-1.41981
aYVQMDGEPWk	Q6K4P5	N-Term(iTRAQ8plex); K11(iTRAQ8plex)	50.41	0.897628	4	0.802621	4	0.815705	4	0.947558	4	1.01713	4	0.955361	4	2	1932.01	-3.66842
aYYAVEEVk	A2XYK8	N-Term(iTRAQ8plex); K9(iTRAQ8plex)	12.57	0.939936	1	0.911831	1	0.888549	1	0.895184	1	0.892663	1	0.835289	1	3	1679.94	-1.49318
cAAcGFVSDVDMR	Q6K2P9	N-Term(iTRAQ8plex); C1(Carbamidomethyl); C4(Carbamidomethyl)	30.92	0.778395	1	0.721314	1	0.8566	1	0.698083	1	0.864424	1	0.892137	1	2	1791.8	-6.12777
cAcPSAAQAAAGVR	A2ZFC1	N-Term(iTRAQ8plex); C1(Carbamidomethyl); C3(Carbamidomethyl)	36.74	0.996059	2	1.10302	2	1.24873	2	0.924848	2	0.954291	2	1.17879	2	3	1693.84	-0.523606
cALASSGFQGDIk	A2Z2V9	N-Term(iTRAQ8plex); C1(Carbamidomethyl); K13(iTRAQ8plex)	51.77	0.920659	1	0.840603	1	0.945597	1	0.881526	1	0.834299	1	0.780249	1	2	1962.05	-3.96783
cAPFQSPNYGSLk	Q651C2	N-Term(iTRAQ8plex); C1(Carbamidomethyl); K13(iTRAQ8plex)	14.19	0.965687	2	0.991427	2	0.953079	2	1.0665	2	0.992158	2	1.05763	2	3	2077.1	1.50308
cASVGGVDYSDIAR	B8ANG4	N-Term(iTRAQ8plex); C1(Carbamidomethyl)	23.57	0.850712	1	0.942956	1	0.962596	1	1.06617	1	1.16092	1	1.04252	1	2	1773.87	-3.73304
cATITPDEAR	Q7F280	N-Term(iTRAQ8plex); C1(Carbamidomethyl)	39.16	1.134	2	0.984353	2	1.075	2	0.811038	2	0.828055	2	0.865088	2	3	1437.73	-0.724915
cAVAVDVPR	A2Z0M1	N-Term(iTRAQ8plex); C1(Carbamidomethyl)	5.36	1.00823	1	1.24442	1	1.36251	1	0.988929	1	0.915416	1	1.20843	1	2	1290.71	-4.66242
cAVSHEQIR	Q5VME5;A2YBW4	N-Term(iTRAQ8plex); C1(Carbamidomethyl)	15.16													2	1403.73	-3.45235
cAYVTEk	Q5N725	N-Term(iTRAQ8plex); C1(Carbamidomethyl); K7(iTRAQ8plex)	9.2	1.0545	1	1.06318	1	1.08728	1	1.14543	1	1.23891	1	1.2445	1	3	1478.81	-3.42411
ccDSIVQLPQR	A6MZH2	N-Term(iTRAQ8plex); C1(Carbamidomethyl); C2(Carbamidomethyl)	49.27	0.916177	1	1.08734	1	1.41188	1	0.935531	1	1.07125	1	1.62983	1	3	1679.85	-2.28363
ccIEDATSEVR	Q0DWG3	N-Term(iTRAQ8plex); C1(Carbamidomethyl); C2(Carbamidomethyl)	9.2	0.792643	1	0.800962	1	0.824739	1	1.2759	1	1.21989	1	1.17472	1	2	1643.76	-4.58109
ccPcLDSR	Q2R8J4	N-Term(iTRAQ8plex); C1(Carbamidomethyl); C2(Carbamidomethyl); C4(Carbamidomethyl)	19.85	0.831506	3	1.01246	3	0.938579	3	0.906367	3	0.962088	3	0.802678	3	3	1371.61	-0.273264
cDAGDVESDHDGAAAAAER	Q6H3Z6	N-Term(iTRAQ8plex); C1(Carbamidomethyl)	58.15	1.04156	1	1.20026	1	1.06016	1	1.07056	1	0.755569	1	0.72334	1	3	2220.97	-1.15409
cDDELEPGk	A6MZH2	N-Term(iTRAQ8plex); C1(Carbamidomethyl); K9(iTRAQ8plex)	23.91	0.828299	2	0.724835	2	0.738129	2	1.01132	2	0.928843	2	0.976238	2	2	1670.84	-4.37469
cDLAENR	P40392	N-Term(iTRAQ8plex); C1(Carbamidomethyl)	19.11	0.917315	1	0.840085	1	0.879608	1	0.991412	1	0.9669	1	0.949429	1	2	1181.58	-3.28449
cDLSENSTAIDSR	A2YMQ9	N-Term(iTRAQ8plex); C1(Carbamidomethyl)	47	1.04884	1	0.745975	1	0.953068	1	0.854663	1	1.04746	1	0.97205	1	2	1771.84	-3.58474
cDTGNAPPATVVR	A2ZLU3	N-Term(iTRAQ8plex); C1(Carbamidomethyl)	10.21	0.888254	1	0.961761	1	1.08659	1	0.812915	1	0.784584	1	0.861967	1	3	1661.85	-2.67794
cDVIASGIVNAAk	Q6K9N6	N-Term(iTRAQ8plex); C1(Carbamidomethyl); K13(iTRAQ8plex)	25.37	0.841267	1	0.845122	1	0.920278	1	1.04721	1	1.03796	1	1.06904	1	3	1926.09	-0.664981
cDVIVINTPLTEk	B8B2F2	N-Term(iTRAQ8plex); C1(Carbamidomethyl); K13(iTRAQ8plex)	50.78	0.782257	1	0.869926	1	1.03153	1	1.27669	1	1.20362	1	1.16692	1	2	2110.2	-2.97979
cEADVAGQcPSELR	O04363	N-Term(iTRAQ8plex); C1(Carbamidomethyl); C9(Carbamidomethyl)	27.67	0.931011	1	0.887258	1	0.912883	1	0.947276	1	0.90607	1	0.961952	1	2	1895.89	1.33658
cEcEPGWk	Q8H7Y2	N-Term(iTRAQ8plex); C1(Carbamidomethyl); C3(Carbamidomethyl); K8(iTRAQ8plex)	38.81	0.914934	6	1.00307	6	0.998054	6	1.14718	6	1.13477	6	1.06975	6	2	1673.82	-2.08107
cEDTSNIDVIAV	B8ATU6	N-Term(iTRAQ8plex); C1(Carbamidomethyl)	17.02	1.18065	1	1.02958	1	1.19043	1	1.04313	1	1.06582	1	1.11297	1	2	1639.81	-4.08468
cEDTSNIDVIPV	Q6Z1R9	N-Term(iTRAQ8plex); C1(Carbamidomethyl)	58.64	1.67074	1	1.4075	1	1.18494	1	1.10684	1	1.12797	1	1.30875	1	2	1665.83	-1.69096
cEEAPGcGEWk	Q7XV86	N-Term(iTRAQ8plex); C1(Carbamidomethyl); C7(Carbamidomethyl); K11(iTRAQ8plex)	42.77	0.765554	2	0.739979	2	0.732947	2	1.11621	2	1.0761	2	1.01043	2	3	1930.92	-3.13528
cEEIcmSGGLVR	Q75J18	N-Term(iTRAQ8plex); C1(Carbamidomethyl); C5(Carbamidomethyl); M6(Oxidation)	13.21	1.30692	1	1.83477	1	1.95937	1	1.25315	1	1.06076	1	1.4463	1	3	1730.81	-3.69758
cENTAMLGER	Q7XKB5	N-Term(iTRAQ8plex); C1(Carbamidomethyl)	29.4	1.00562	1	0.98099	1	0.966975	1	0.81178	1	0.641755	1	0.779453	1	2	1484.71	-4.21369
cESAcPTDFLSVR	P0C359	N-Term(iTRAQ8plex); C1(Carbamidomethyl); C5(Carbamidomethyl)	10.5	0.892408	1	0.896289	1	1.36821	1	1.04154	1	0.897453	1	1.05351	1	2	1845.87	-3.16681
cEVAAVEDGR	Q6Z3N3	N-Term(iTRAQ8plex); C1(Carbamidomethyl)	34.73	1.02018	2	0.983601	2	0.985604	2	0.897816	2	0.904111	2	0.956148	2	2	1409.69	-3.84043
cEVHAVNADPGGGR	Q688X1	N-Term(iTRAQ8plex); C1(Carbamidomethyl)	17.92	1.08955	3	1.64539	3	1.40069	3	1.16727	3	0.993751	3	1.00579	3	3	1742.85	-3.06853
cFAAckPPTScATAR	B8BE27	N-Term(iTRAQ8plex); C1(Carbamidomethyl); C5(Carbamidomethyl); K6(iTRAQ8plex); C11(Carbamidomethyl)	11.9	1.27056	1	1.76252	1	1.48842	1	1.27864	1	0.933308	1	1.02752	1	4	2306.16	-1.60564
cFASPPVPPPLHR	Q6L529	N-Term(iTRAQ8plex); C1(Carbamidomethyl)	27.52	1.473	1	1.4001	1	1.23731	1	1.1062	1	0.935592	1	1.01579	1	3	1778.96	-3.52696
cFGYMVSk	Q8H8T0	N-Term(iTRAQ8plex); C1(Carbamidomethyl); K8(iTRAQ8plex)	23.52	0.84982	2	0.861669	2	0.841732	2	0.942961	2	0.966668	2	0.909392	2	2	1599.84	-7.1918
cFLSGMPDLk	Q6ZGX8	N-Term(iTRAQ8plex); C1(Carbamidomethyl); K10(iTRAQ8plex)	9.08	0.917632	1	0.818005	1	0.743249	1	0.984632	1	0.99908	1	0.942284	1	2	1775.96	-2.7157
cFPDGIPk	Q6YZK2	N-Term(iTRAQ8plex); C1(Carbamidomethyl); K8(iTRAQ8plex)	26.04	0.88802	1	0.888033	1	0.785219	1	0.902412	1	0.903374	1	0.89472	1	2	1541.85	-5.22011
cFTDcVDTFR	B8BML4	N-Term(iTRAQ8plex); C1(Carbamidomethyl); C5(Carbamidomethyl)	22.44	0.934927	1	0.775451	1	0.85007	1	1.04842	1	1.07037	1	1.1154	1	2	1624.74	-2.17231
cFVGGLAWATDDR	A2ZN20;Q10FE5	N-Term(iTRAQ8plex); C1(Carbamidomethyl)	44.49													3	1771.87	-1.49802
cGAGTADPGcSEk	Q9FWL0	N-Term(iTRAQ8plex); C1(Carbamidomethyl); C10(Carbamidomethyl); K13(iTRAQ8plex)	18.83	1.06635	1	1.33296	1	1.16755	1	1.23235	1	1.15865	1	1.17016	1	3	1917.92	-2.26421
cGAPPASASASAQR	B9FB57	N-Term(iTRAQ8plex); C1(Carbamidomethyl)	58	0.91135	2	0.844568	2	0.630075	2	0.851454	2	0.825813	2	0.912095	2	3	1634.82	-2.51154
cGFTETNYTQLTELYQk	Q10L56	N-Term(iTRAQ8plex); C1(Carbamidomethyl); K17(iTRAQ8plex)	12.03	1.00753	8	0.910422	8	1.02463	8	0.890413	8	0.992139	8	0.925726	8	3	2704.37	-1.8108
cGGVLEAIR	B9FTD5;B8APL1;Q6YWH9	N-Term(iTRAQ8plex); C1(Carbamidomethyl)	12.53													2	1278.71	-0.219372
cGIAVEPSYPLk	B8AVK3	N-Term(iTRAQ8plex); C1(Carbamidomethyl); K12(iTRAQ8plex)	44.86	0.913638	1	0.83499	1	0.847481	1	0.956153	1	0.941157	1	0.832871	1	2	1942.09	-1.44786
cGINYQPPSVVPGGDLAk	P28752;Q0PVB1	N-Term(iTRAQ8plex); C1(Carbamidomethyl); K18(iTRAQ8plex)	46.3													3	2480.34	-2.07015
cGINYQPPSVVPSGDLAk	Q10DN0	N-Term(iTRAQ8plex); C1(Carbamidomethyl); K18(iTRAQ8plex)	61.68	0.926836	1	0.825956	1	0.81076	1	0.858964	1	1.00497	1	1.05333	1	2	2510.35	-2.94001
cGLEGVYLPGk	B8AND8	N-Term(iTRAQ8plex); C1(Carbamidomethyl); K11(iTRAQ8plex)	24.86	0.902487	1	1.03181	1	0.848964	1	0.864137	1	0.942702	1	1.05815	1	2	1801.02	2.30238
cGLNNELNGVDEPSR	A2WNF5	N-Term(iTRAQ8plex); C1(Carbamidomethyl)	20.29	1.32727	1	1.19831	1	1.12604	1	1.10049	1	1.00085	1	1.24927	1	2	1977.95	-6.03644
cGLTYVYNQk	P51431	N-Term(iTRAQ8plex); C1(Carbamidomethyl); K10(iTRAQ8plex)	34.91	0.915931	2	0.870676	2	0.831127	2	1.00296	2	0.964065	2	0.890539	2	3	1854	-1.96115
cGLTYVYNQQA	Q9ARZ9	N-Term(iTRAQ8plex); C1(Carbamidomethyl)	30.11	1.16914	1	1.1142	1	1.42787	1	1.19294	1	1.12466	1	1.16628	1	2	1620.8	-2.47386
cGSVTVR	Q84M35	N-Term(iTRAQ8plex); C1(Carbamidomethyl)	0.45	0.947096	1	0.76946	1	0.753012	1	0.850071	1	0.833075	1	0.835292	1	2	1082.59	-2.7544
cGVLFIGk	Q0JFH7	N-Term(iTRAQ8plex); C1(Carbamidomethyl); K8(iTRAQ8plex)	25.13	0.932852	1	0.926649	1	0.909084	1	0.984666	1	0.945765	1	0.972353	1	2	1501.9	-3.38575
cGVLPGSANLcASGR	A2ZCR2	N-Term(iTRAQ8plex); C1(Carbamidomethyl); C11(Carbamidomethyl)	32.54	1.1373	2	1.57344	2	1.36922	2	0.930593	2	0.940189	2	1.03545	2	3	1822.92	-1.52476
cGVNVGFPISLSTDcNk	Q0IQK7	N-Term(iTRAQ8plex); C1(Carbamidomethyl); C15(Carbamidomethyl); K17(iTRAQ8plex)	39.07	0.907105	2	0.919979	2	0.879783	2	0.984453	2	1.04494	2	0.914588	2	3	2476.27	-1.43878
cGVNVGFPISLSTDcSk	A2ZAT2	N-Term(iTRAQ8plex); C1(Carbamidomethyl); C15(Carbamidomethyl); K17(iTRAQ8plex)	42.23	0.950556	5	0.914175	5	1.0124	5	1.01322	5	1.10793	5	0.982189	5	3	2449.27	-0.14422
cGVSIPYTISPSIDcSSVN	Q7XJ39;Q2QYL2	N-Term(iTRAQ8plex); C1(Carbamidomethyl); C15(Carbamidomethyl)	28.67													2	2360.14	-1.11675
cGVTTDASAcAk	Q0D9K5	N-Term(iTRAQ8plex); C1(Carbamidomethyl); C10(Carbamidomethyl); K12(iTRAQ8plex)	55	0.550902	3	0.54071	3	0.553324	3	1.19257	3	1.20929	3	1.15777	3	2	1848.94	-2.41686
cIDAFIQQLR	B9F0T2	N-Term(iTRAQ8plex); C1(Carbamidomethyl)	36.1	1.0509	8	0.974418	8	1.05813	8	0.883371	8	0.861944	8	0.905625	8	3	1567.85	-1.39483
cIDEGTHPR	Q6ASR1	N-Term(iTRAQ8plex); C1(Carbamidomethyl)	18.6	1.64191	1	2.57864	1	1.75494	1	1.86226	1	0.925149	1	1.05613	1	3	1388.69	-2.04308
cIELDPTFSk	Q6H660	N-Term(iTRAQ8plex); C1(Carbamidomethyl); K10(iTRAQ8plex)	24.53	1.01089	1	0.84599	1	0.81535	1	0.92235	1	0.906095	1	0.847627	1	2	1817.99	-2.78154
cIIFHNVDQTR	Q84LG6;Q6Z720	N-Term(iTRAQ8plex); C1(Carbamidomethyl)	23.21													3	1706.88	-6.19358
cILLDDDYDPk	Q0ITI9	N-Term(iTRAQ8plex); C1(Carbamidomethyl); K11(iTRAQ8plex)	26.98	0.897801	1	0.801771	1	0.84357	1	0.91177	1	0.959079	1	1.04219	1	2	1975.04	2.49036
cISDEIk	A3BMI4	N-Term(iTRAQ8plex); C1(Carbamidomethyl); K7(iTRAQ8plex)	23.86	0.892439	1	0.783764	1	0.739797	1	0.980701	1	1.04169	1	1.01439	1	2	1472.82	-4.47914
cISSGVLNPAR	A2YCF0	N-Term(iTRAQ8plex); C1(Carbamidomethyl)	13.43	1.05928	1	1.14542	1	1.09877	1	0.888298	1	0.875786	1	0.923933	1	2	1477.81	1.2233
cLAAYGDPVSAVk	B9EYD6	N-Term(iTRAQ8plex); C1(Carbamidomethyl); K13(iTRAQ8plex)	41.92	0.789658	1	0.67266	1	0.723126	1	0.815165	1	0.936901	1	0.824587	1	2	1959.08	-0.0939365
cLcDLYASPEIFk	Q653H4	N-Term(iTRAQ8plex); C1(Carbamidomethyl); C3(Carbamidomethyl); K13(iTRAQ8plex)	75.46	0.926357	87	0.848066	87	0.86701	87	0.998504	87	1.01667	87	0.950168	87	2	2224.15	-3.2082
cLFDTDDEVR	Q8H852	N-Term(iTRAQ8plex); C1(Carbamidomethyl)	31.05	1.18318	1	1.02361	1	1.08329	1	0.996365	1	1.00199	1	1.00046	1	2	1573.74	-5.67476
cLHYEPR	B9FDE0	N-Term(iTRAQ8plex); C1(Carbamidomethyl)	20.88	1.00881	2	1.36065	2	1.16717	2	1.08627	2	0.969845	2	1.0857	2	3	1278.66	-0.473379
cLLNLNTGDESAVR	A2ZXW2	N-Term(iTRAQ8plex); C1(Carbamidomethyl)	38.32	0.998094	1	0.958878	1	1.02651	1	0.800584	1	0.729274	1	0.832247	1	2	1865.97	0.31133
cLQYEPR	Q336V9	N-Term(iTRAQ8plex); C1(Carbamidomethyl)	13.5	0.853872	1	0.874486	1	0.937938	1	0.976356	1	0.906885	1	0.942775	1	2	1269.65	-1.55225
cLSYLMNDk	B9FDE0	N-Term(iTRAQ8plex); C1(Carbamidomethyl); K9(iTRAQ8plex)	8.19	0.959707	19	0.872923	19	0.8821	19	0.914811	19	1.02478	19	0.919989	19	3	1751.92	-4.7276
cLVAEGWSPVFATSQIQDALQR	B8BG04	N-Term(iTRAQ8plex); C1(Carbamidomethyl)	34.1	1.07947	1	1.13741	1	1.29731	1	1.07857	1	1.50926	1	1.75908	1	3	2780.43	-2.51508
cLYWEGk	Q8RU48	N-Term(iTRAQ8plex); C1(Carbamidomethyl); K7(iTRAQ8plex)	27.2	0.857548	1	0.748482	1	0.751939	1	1.01088	1	1.01878	1	0.984285	1	2	1563.84	-6.36689
cmARPGSSGMckLGAVQHSAR	A2XJD6	N-Term(iTRAQ8plex); C1(Carbamidomethyl); M2(Oxidation); C11(Carbamidomethyl); K12(iTRAQ8plex)	1	1.16965	1	0.635265	1	1.10213	1	1.51993	1	1.10688	1	0.674048	1	2	2885.46	-0.774379
cMEPVEk	Q943K7;Q10NA9;Q84TA1;Q6L509;Q53NM9	N-Term(iTRAQ8plex); C1(Carbamidomethyl); K7(iTRAQ8plex)	17.6													2	1500.79	-5.12578
cMGDPNADSDHPLLk	Q339K4	N-Term(iTRAQ8plex); C1(Carbamidomethyl); K15(iTRAQ8plex)	1.05	1.14066	1	1.0102	1	0.966415	1	1.04941	1	0.830153	1	0.907896	1	3	2278.13	-3.31276
cMMGIDTPSk	H2KX77	N-Term(iTRAQ8plex); C1(Carbamidomethyl); K10(iTRAQ8plex)	45.44	0.87123	2	0.796995	2	0.870667	2	1.0176	2	1.08037	2	1.06256	2	2	1747.9	-1.51426
cMSPPELDVPLk	Q9ST27	N-Term(iTRAQ8plex); C1(Carbamidomethyl); K12(iTRAQ8plex)	32.16	0.981072	1	0.883344	1	1.00115	1	0.93382	1	0.833714	1	0.809855	1	2	1994.09	1.21266
cNDELEPSk	Q9AWV5	N-Term(iTRAQ8plex); C1(Carbamidomethyl); K9(iTRAQ8plex)	34.82	0.834107	2	0.89387	2	0.729674	2	1.00682	2	1.00914	2	0.983476	2	2	1699.87	-3.89897
cNGDVGQSDR	Q8H8C7	N-Term(iTRAQ8plex); C1(Carbamidomethyl)	34.29	1.05595	1	0.741958	1	0.811997	1	0.746535	1	0.628433	1	0.943159	1	2	1411.65	-1.49922
cNSDNPFDINk	A6N150	N-Term(iTRAQ8plex); C1(Carbamidomethyl); K11(iTRAQ8plex)	32.4	0.934149	1	0.90887	1	0.872234	1	1.01708	1	1.08274	1	0.908554	1	2	1931.97	-3.8525
cPDAYLFPEDNTk	P31110	N-Term(iTRAQ8plex); C1(Carbamidomethyl); K13(iTRAQ8plex)	38.07	0.982383	2	0.802913	2	0.843305	2	1.01144	2	1.03366	2	0.866507	2	3	2178.1	-1.6812
cPLAVIcPLQLQLVDPDVAATAFQR	Q75LJ9	N-Term(iTRAQ8plex); C1(Carbamidomethyl); C7(Carbamidomethyl)	66.97	0.950149	6	0.949284	6	1.25392	6	1.16798	6	0.877439	6	0.878054	6	3	3099.66	-0.780482
cPSENFQLSNPADPR	Q851M7	N-Term(iTRAQ8plex); C1(Carbamidomethyl)	38.76	0.885858	1	1.01898	1	1.28886	1	0.823107	1	1.18471	1	1.14807	1	2	2035.98	-1.88947
cPTcESTIIEVDFNk	B9G4E5	N-Term(iTRAQ8plex); C1(Carbamidomethyl); C4(Carbamidomethyl); K15(iTRAQ8plex)	0.86	0.227616	1	0.553177	1	0.538591	1	0.427416	1	0.528561	1			3	2421.21	-5.01175
cPTGASFGFGGk	Q94LY4	N-Term(iTRAQ8plex); C1(Carbamidomethyl); K12(iTRAQ8plex)	34.93	0.917123	3	0.845402	3	0.950349	3	0.995749	3	1.05905	3	0.948473	3	3	1793.94	-4.89874
cQEDPSHWTk	A2XHR1	N-Term(iTRAQ8plex); C1(Carbamidomethyl); K10(iTRAQ8plex)	26.26	0.81479	5	0.818344	5	0.765004	5	1.00837	5	0.973674	5	1.00085	5	3	1895.95	-1.50683
cQQDFTk	Q6YZD3	N-Term(iTRAQ8plex); C1(Carbamidomethyl); K7(iTRAQ8plex)	28.26	0.825995	7	1.08175	7	1.03802	7	1.72322	7	1.26216	7	1.22337	7	2	1534.81	-2.71502
cScNSDVNcDPSk	Q6AV51	N-Term(iTRAQ8plex); C1(Carbamidomethyl); C3(Carbamidomethyl); C9(Carbamidomethyl); K13(iTRAQ8plex)	43.36	0.719336	1	0.586211	1	0.728073	1	0.853638	1	0.669615	1	0.697129	1	3	2150.97	-1.28899
cSTEAGPGGDPLR	Q7XXD4	N-Term(iTRAQ8plex); C1(Carbamidomethyl)	31.69	1.11224	1	1.7991	1	1.44363	1	1.09868	1	0.969521	1	1.18902	1	3	1620.79	-1.23778
cSVDSGVYDDVATR	B9EVI1	N-Term(iTRAQ8plex); C1(Carbamidomethyl)	68.82	0.955267	3	0.912131	3	0.904224	3	1.06806	3	1.04623	3	1.11231	3	2	1847.87	-0.887954
cTLHETIR	A2YYM7;Q9AUR8	N-Term(iTRAQ8plex); C1(Carbamidomethyl)	4.55													2	1333.72	-2.17189
cTSPFLDNDAAAVR	Q259N9;Q7XR60	N-Term(iTRAQ8plex); C1(Carbamidomethyl)	48.43													3	1840.91	-1.6008
cTSVAWVPER	Q2QX21	N-Term(iTRAQ8plex); C1(Carbamidomethyl)	17.23	0.912912	1	0.866458	1	0.933286	1	0.974343	1	1.07502	1	0.994622	1	2	1508.78	-2.80688
cTVFPLVk	B9FEY9;Q6ZD35	N-Term(iTRAQ8plex); C1(Carbamidomethyl); K8(iTRAQ8plex)	32.33													3	1571.95	1.61648
cTYVTESTGR	Q5VS79	N-Term(iTRAQ8plex); C1(Carbamidomethyl)	22.42	0.925448	5	0.87558	5	0.869447	5	1.0817	5	1.0484	5	1.03524	5	2	1477.72	-4.11522
cTyVTESTGR	Q5VS79	N-Term(iTRAQ8plex); C1(Carbamidomethyl); Y3(iTRAQ8plex)	1	0.965589	1	0.987864	1	0.859799	1	1.18351	1	1.24307	1	1.21726	1	3	1781.93	-3.23589
cVDALGSALER	A2YMK6	N-Term(iTRAQ8plex); C1(Carbamidomethyl)	13.53	0.847262	4	0.89986	4	1.00035	4	1.18336	4	1.11271	4	1.20756	4	2	1494.78	-4.13768
cVEESGADRPSMGEAVAEIER	B9GCD1	N-Term(iTRAQ8plex); C1(Carbamidomethyl)	36.87	1.0214	29	1.02291	29	1.02686	29	0.985986	29	0.968818	29	0.948454	29	3	2596.23	-0.201756
cVEGcPDATcAHR	A2XG55	N-Term(iTRAQ8plex); C1(Carbamidomethyl); C5(Carbamidomethyl); C10(Carbamidomethyl)	6.22	1.33489	1	1.83851	1	1.30954	1	1.3821	1	1.02759	1	0.862608	1	3	1836.81	-1.309
cVGDPEADEENPVLk	Q10LT8	N-Term(iTRAQ8plex); C1(Carbamidomethyl); K15(iTRAQ8plex)	68.74	0.930915	1	0.801	1	0.851486	1	0.966053	1	0.997841	1	0.953569	1	3	2280.16	-1.28608
cVLVESSSPR	B8B475	N-Term(iTRAQ8plex); C1(Carbamidomethyl)	14.49	1.06386	1	1.12742	1	1.15192	1	0.879851	1	0.880105	1	0.880457	1	2	1437.76	-1.92753
cVNSDFDk	Q01HN4	N-Term(iTRAQ8plex); C1(Carbamidomethyl); K8(iTRAQ8plex)	23.66	0.862296	2	0.795306	2	0.739735	2	1.05966	2	1.01674	2	1.02517	2	2	1592.81	-5.29651
cVSQMVLAR	B8AK12	N-Term(iTRAQ8plex); C1(Carbamidomethyl)	8.2	1.0855	1	1.03503	1	1.18131	1	0.964465	1	0.891425	1	0.918681	1	2	1367.74	-4.76617
cVVPLAAAISPVR	A2ZDV4	N-Term(iTRAQ8plex); C1(Carbamidomethyl)	11.3	0.845199	1	0.85704	1	0.864008	1	0.961357	1	0.99354	1	0.956121	1	3	1656.98	-1.05388
cWDANPDk	Q75J49;Q6L5F3	N-Term(iTRAQ8plex); C1(Carbamidomethyl); K8(iTRAQ8plex)	24.39													2	1613.82	-2.71518
cYLATGISk	B8B2J2	N-Term(iTRAQ8plex); C1(Carbamidomethyl); K9(iTRAQ8plex)	24.35	0.97185	1	0.903629	1	0.939959	1	0.911976	1	0.946785	1	0.864979	1	3	1620.92	-3.51545
cYTEcFGMk	Q948T6	N-Term(iTRAQ8plex); C1(Carbamidomethyl); C5(Carbamidomethyl); K9(iTRAQ8plex)	27.33	0.980917	3	0.866248	3	0.957993	3	0.846011	3	0.839556	3	0.745022	3	2	1803.87	-1.22213
dAAAAASSSSGk	B9EYZ4	N-Term(iTRAQ8plex); K12(iTRAQ8plex)	40.21	0.961242	2	1.1357	2	0.864629	2	1.0959	2	0.821569	2	0.894135	2	3	1630.88	-0.721509
dAAAcAGcVSGAFQR	Q69W20	N-Term(iTRAQ8plex); C5(Carbamidomethyl); C8(Carbamidomethyl)	39.37	1.01817	3	1.09786	3	1.08958	3	0.876995	3	0.867346	3	1.01314	3	3	1844.86	-2.51701
dAAADEADAAATN	A2YDT7	N-Term(iTRAQ8plex)	72.83	1.08443	2	1.07164	2	1.375	2	0.97751	2	0.918652	1	1.00011	2	2	1509.69	-2.36621
dAAAEDLSER	Q6AVA4	N-Term(iTRAQ8plex)	15.85	1.04396	1	0.957613	1	1.08895	1	0.881818	1	0.918394	1	0.959358	1	2	1380.69	-1.70722
dAAANNLk	Q6K4K9	N-Term(iTRAQ8plex); K8(iTRAQ8plex)	28.21	0.981469	4	1.03248	4	1.01195	4	1.01237	4	1.1183	4	1.04502	4	2	1424.83	-4.06784
dAAAPAVSPAT	Q0E1D7	N-Term(iTRAQ8plex)	47.57	1.6265	1	1.59625	1	1.6587	1	0.983098	1	1.26691	1	1.9418	1	2	1274.69	-3.00217
dAAAQAAANA	P49398	N-Term(iTRAQ8plex)	37.04	1.02102	3	1.15308	3	1.05032	3	1.14561	3	1.18333	3	0.965362	3	2	1177.61	-2.59446
dAADATLAAYQAAQDIAMk	Q84J55	N-Term(iTRAQ8plex); K19(iTRAQ8plex)	45.84	0.931933	5	0.851619	5	0.813367	5	0.869514	5	0.894571	5	0.869101	5	4	2546.33	-2.05584
dAADHAVk	B9EV54	N-Term(iTRAQ8plex); K8(iTRAQ8plex)	32.76	1.0076	1	0.978948	1	0.838375	1	0.857459	1	0.715895	1	0.700664	1	2	1434.81	-3.25641
dAAEALLLR	Q8S213	N-Term(iTRAQ8plex)	29.94	0.943325	3	0.985122	3	1.13788	3	1.02846	3	1.00503	3	1.08891	3	2	1275.76	-1.48973
dAAEGQEGEAATEEAk	Q0JDZ7	N-Term(iTRAQ8plex); K16(iTRAQ8plex)	75.18	0.896164	2	0.68355	2	0.756584	2	1.07393	2	1.13772	2	1.01485	2	2	2214.09	-3.01748
dAAENTMVAYk	Q7XTE8;Q6EUP4	N-Term(iTRAQ8plex); K11(iTRAQ8plex)	59.28													2	1820.97	-0.781667
dAAENTmVAYk	Q7XTE8;Q6EUP4	N-Term(iTRAQ8plex); M7(Oxidation); K11(iTRAQ8plex)	36.12													3	1836.96	-2.89827
dAAFASLAR	Q6ZFJ0	N-Term(iTRAQ8plex)	26.45	0.680384	2	0.587503	2	0.62721	2	1.25809	2	1.27933	2	1.25126	2	2	1225.68	-1.5099
dAAGGAPYGGSNIGMGTYS	Q6Z3C2	N-Term(iTRAQ8plex)	68.83	0.938668	1	1.34288	1	1.33486	1	1.16827	1	1.26529	1	1.24797	1	2	2049.94	-2.83836
dAAPNNPSLR	B8A753	N-Term(iTRAQ8plex)	23.76	1.25139	1	1.76263	1	2.02869	1	1.16046	1	1.13199	1	1.57645	1	3	1358.73	-1.75629
dAAPSSLAAIk	Q01J03	N-Term(iTRAQ8plex); K11(iTRAQ8plex)	31.98	0.826107	2	0.73325	2	0.748223	2	1.05078	2	1.10696	2	0.98623	2	2	1651.99	0.740758
dAAPSSLADIk	Q6YY47	N-Term(iTRAQ8plex); K11(iTRAQ8plex)	38.02	0.943314	9	0.926824	9	0.919371	9	1.13426	9	1.04883	9	1.0065	9	2	1695.97	-4.00642
dAAQLALk	Q337B2;Q8GZX1	N-Term(iTRAQ8plex); K8(iTRAQ8plex)	19.83													2	1437.88	-7.95513
dAASGDAVAFDAR	Q0JQM5	N-Term(iTRAQ8plex)	45.75	1.11371	2	1.32082	2	1.54558	2	0.914889	2	1.00651	2	1.17493	2	2	1569.78	-2.83631
dAATAAAVADEEk	A3BI11	N-Term(iTRAQ8plex); K13(iTRAQ8plex)	76.96	1.03152	2	0.923116	2	0.999596	2	0.948732	2	1.00837	2	0.983256	2	2	1869.99	-4.40624
dAAVVLSTTk	Q5TKP2;A6N0A1	N-Term(iTRAQ8plex); K10(iTRAQ8plex)	44.04													2	1612.97	-1.4077
dAcAAIVAESYR	Q6K3D4	N-Term(iTRAQ8plex); C3(Carbamidomethyl)	42.72	1.12373	2	1.1336	2	1.3536	2	0.991737	2	1.07306	2	1.04622	2	3	1629.82	-0.00636046
dAcHAAAVSPAFR	A2XAX4	N-Term(iTRAQ8plex); C3(Carbamidomethyl)	12.68	1.40245	1	2.08118	1	2.22886	1	1.25499	1	0.813095	1	1.15397	1	3	1676.84	-3.32344
dADEPTVEDkPR	Q0JDF0	N-Term(iTRAQ8plex); K10(iTRAQ8plex)	24.44	0.979506	1	1.10006	1	1.09996	1	1.11485	1	1.01136	1	1.04397	1	3	1980.04	-3.4467
dADPLAVYAISk	A3BRV6	N-Term(iTRAQ8plex); K12(iTRAQ8plex)	47.56	0.758313	3	0.663142	3	0.615157	3	1.14736	3	1.15419	3	1.04616	3	2	1871.07	-3.03286
dADRFPSAIAR	B9F0T2	N-Term(iTRAQ8plex)	19	1.20221	5	1.25422	5	1.16713	5	0.821839	5	0.739995	5	0.730717	5	3	1522.82	-2.21443
dADSEEFNSETPFR	Q2QNR9	N-Term(iTRAQ8plex)	43.72	0.946215	1	0.995639	1	0.908185	1	0.812544	1	1.05243	1	0.78166	1	2	1947.88	-1.27626
dADTPcIIEEGPTR	A2Y0Q8	N-Term(iTRAQ8plex); C6(Carbamidomethyl)	48.14	1.12828	3	1.09471	3	1.05427	3	1.01445	3	0.897531	3	1.0481	3	2	1877.92	-3.39445
dADVVISAVR	A2WJQ6	N-Term(iTRAQ8plex)	23.03	1.14072	5	1.09719	5	1.26061	5	0.966015	5	0.944057	5	1.08722	5	2	1348.77	-0.701788
dAEAGDEk	Q5SMQ9	N-Term(iTRAQ8plex); K8(iTRAQ8plex)	19.1	0.903116	1	1.21668	1	0.896511	1	1.06688	1	0.980079	1	1.07713	1	3	1442.75	-3.02919
dAEEEAEEESGSGAR	Q01L89	N-Term(iTRAQ8plex)	68.91	1.16865	7	1.2532	7	1.51219	7	0.781299	7	0.855434	7	1.0074	7	2	1869.82	-0.516065
dAEGAGIYGSQGR	A2YLX7	N-Term(iTRAQ8plex)	12.97	1.11916	1	1.26168	1	1.17355	1	1.01839	1	0.996305	1	1.23373	1	3	1584.79	-3.05894
dAESDYYDEDEYSGR	Q67VW4	N-Term(iTRAQ8plex)	63.75	0.795075	1	0.910976	1	0.992426	1	0.997033	1	1.11952	1	1.3078	1	2	2117.88	1.41868
dAEWETcVPVTDR	B9G3F4	N-Term(iTRAQ8plex); C7(Carbamidomethyl)	19.69	1.01307	1	1.05355	1	0.994285	1	1.08878	1	1.11755	1	1.03965	1	2	1881.89	-3.4655
dAFcSGQDSTAAGTSSEk	Q25AL9	N-Term(iTRAQ8plex); C4(Carbamidomethyl); K18(iTRAQ8plex)	30.43	1.07722	1	1.05988	1	1.09117	1	1.108	1	1.29826	1	1.16641	1	3	2427.15	-3.10775
dAFNTFFSETSSGk	Q10PW2	N-Term(iTRAQ8plex); K14(iTRAQ8plex)	9.09	0.990252	2	0.873197	2	0.948682	2	0.947622	2	0.974027	2	0.928734	2	3	2146.08	-5.90093
dAFQNDQGSR	A3C9W7	N-Term(iTRAQ8plex)	28.04	0.745447	1	0.682295	1	0.770879	1	1.02702	1	1.10042	1	1.01256	1	2	1441.7	-0.957795
dAFSSSGPETGk	Q0D673	N-Term(iTRAQ8plex); K12(iTRAQ8plex)	24.47	0.976799	1	0.959058	1	0.898732	1	0.846639	1	0.902124	1	0.791886	1	3	1790.93	-5.01974
dAGADVGDVDIPGVR	Q5VME5;A2YBW4	N-Term(iTRAQ8plex)	37.07													2	1759.92	2.50729
dAGATATIASVR	B9EW81	N-Term(iTRAQ8plex)	33.69	1.24125	2	1.375	2	1.46409	2	1.09076	2	1.05293	2	1.11518	2	2	1436.79	-4.60755
dAGAVVPTSYEALETAIk	Q93VT8	N-Term(iTRAQ8plex); K18(iTRAQ8plex)	37.25	1.0719	11	1.02132	11	1.16623	11	0.991636	11	1.00598	11	1.03883	11	4	2443.35	-2.57527
dAGDDEENLR	Q8GU86	N-Term(iTRAQ8plex)	17.82	0.706587	1	0.980502	1	0.765308	1	0.898373	1	1.15026	1	0.97442	1	2	1437.67	-4.50737
dAGEDEDNNISAEEER	Q84NP4	N-Term(iTRAQ8plex)	33.17	1.07303	2	0.961818	2	0.880787	2	0.882127	2	0.931611	2	0.875409	2	3	2096.91	-0.570043
dAGFAPTR	B8B3Y3	N-Term(iTRAQ8plex)	18.04	0.975933	2	1.11928	2	1.09301	2	0.991601	2	1.04133	2	1.1091	2	2	1138.61	-3.28747
dAGFDELTASLPADGcR	A2XNF7	N-Term(iTRAQ8plex); C16(Carbamidomethyl)	8.62	1.06996	3	1.04257	3	1.26638	3	0.90277	3	0.993655	3	1.03017	3	3	2099.01	2.40292
dAGIPYk	Q7Y164	N-Term(iTRAQ8plex); K7(iTRAQ8plex)	7.01	1.00335	1	0.960802	1	0.970912	1	1.00191	1	1.00473	1	0.976167	1	2	1371.8	-5.41324
dAGMVDDPk	Q5N747	N-Term(iTRAQ8plex); K9(iTRAQ8plex)	23.46	0.833262	1	0.680737	1	0.758178	1	0.911961	1	1.01312	1	0.921208	1	2	1555.82	-3.07843
dAGSTASTAILVGDR	Q67UX7	N-Term(iTRAQ8plex)	43.46	1.16645	1	1.24269	1	1.23485	1	1.05124	1	0.889984	1	0.971324	1	2	1737.92	-2.52107
dAGVIAGLNVAR	Q6Z7B0	N-Term(iTRAQ8plex)	36.06	0.972746	20	1.03857	20	1.11095	20	1.04514	20	1.0168	20	1.06317	20	2	1459.85	-2.95415
dAGVIAGLNVMR	Q943K7;Q84TA1;Q6L509;Q53NM9	N-Term(iTRAQ8plex)	25.11													2	1519.86	-1.04555
dAGVIAGLNVmR	Q943K7;Q84TA1;Q6L509;Q53NM9	N-Term(iTRAQ8plex); M11(Oxidation)	26.66													3	1535.85	0.280433
dAGVISGLNVMR	Q10NA9	N-Term(iTRAQ8plex)	71.62	1.11195	19	1.09092	19	1.14347	19	0.967217	19	0.943325	19	1.01252	19	3	1535.85	-0.312415
dAGVISGLNVmR	Q10NA9	N-Term(iTRAQ8plex); M11(Oxidation)	32.62	1.12584	2	1.14723	2	1.30853	2	0.958748	2	0.943582	2	1.03334	2	3	1551.84	-2.02745
dAHSAGLEIYASDFANDR	Q6ZFH9	N-Term(iTRAQ8plex)	26.79	1.08702	57	1.15158	57	1.00982	57	1.05757	57	1.00422	57	0.994252	57	3	2256.08	-0.988154
dAHTLEEAk	A2XQE0	N-Term(iTRAQ8plex); K9(iTRAQ8plex)	4.72	0.971068	1	1.17173	1	1.03916	1	1.01875	1	1.01463	1	1.08426	1	3	1621.9	-2.01574
dAIAAGIASR	Q338N8	N-Term(iTRAQ8plex)	49.67	1.01959	2	0.993054	2	1.00554	2	0.950587	2	0.997543	2	0.969823	2	3	1248.72	-1.81903
dAIETETEVk	Q5SMQ9	N-Term(iTRAQ8plex); K10(iTRAQ8plex)	37.75	0.949438	3	0.927824	3	0.957408	3	1.09425	3	1.26566	3	1.07133	3	2	1742.96	-3.40129
dAIGVNPLYIGR	B8ALL8	N-Term(iTRAQ8plex)	32.32	0.777993	2	0.733856	2	0.751527	2	1.29133	2	1.4364	2	1.32117	2	2	1591.91	-2.09869
dAILAEGNPAPVVVSEGANTmDVGR	B8A8N0;B9EX46	N-Term(iTRAQ8plex); M21(Oxidation)	52.42													3	2802.42	-0.675364
dAILSGk	Q5KQH5;B8ABA7	N-Term(iTRAQ8plex); K7(iTRAQ8plex)	12.09													2	1311.8	-4.45873
dAIVASGGPYFDVPLGR	Q9ST80	N-Term(iTRAQ8plex)	26.68	1.28001	1	1.04127	1	1.30371	1	1.00158	1	1.09544	1	1.21358	1	2	2038.08	-4.21679
dALAESDk	Q651T8;Q6EUQ9	N-Term(iTRAQ8plex); K8(iTRAQ8plex)	16.98													2	1456.81	-2.19301
dALALEEAR	Q6EQK1	N-Term(iTRAQ8plex)	29.04	0.993787	3	0.969637	3	0.968418	3	0.944336	3	0.87724	3	0.901943	3	2	1291.71	-1.87559
dALLSLVAGGk	B7E4J4	N-Term(iTRAQ8plex); K11(iTRAQ8plex)	55.61	0.896588	38	0.880825	38	0.85342	38	0.995167	38	1.00716	38	0.939353	38	2	1652.01	-3.77455
dALLTTVATEk	Q337E7	N-Term(iTRAQ8plex); K11(iTRAQ8plex)	40.54	0.854686	5	0.842191	5	0.808196	5	0.91352	5	0.982217	5	0.907412	5	2	1770.04	-3.37854
dALQScAQHAR	Q6AVI7	N-Term(iTRAQ8plex); C6(Carbamidomethyl)	39.69	1.02266	2	1.27961	2	1.16811	2	0.869747	2	0.82996	2	0.925614	2	3	1560.78	-2.90711
dAMVSGEGGGAAR	Q6Z901	N-Term(iTRAQ8plex)	9.97	1.02786	1	1.15948	1	1.05635	1	1.02641	1	1.19286	1	1.10346	1	2	1481.72	-6.56241
dANAALEINPDSAk	Q6YUA1	N-Term(iTRAQ8plex); K14(iTRAQ8plex)	63.79	0.988086	2	0.883941	2	0.920238	2	0.958458	2	1.0699	2	0.946657	2	2	2037.11	-0.0422005
dANcIFVFk	A2ZXD8	N-Term(iTRAQ8plex); C4(Carbamidomethyl); K9(iTRAQ8plex)	0.68	0.900592	3	1.02686	3	1	3	1.04425	3	1.11365	3	1.06916	3	3	1721.95	-0.626785
dANSVPLASAYGLAk	B9FA13	N-Term(iTRAQ8plex); K15(iTRAQ8plex)	30.89	1.05311	1	0.904227	1	0.889938	1	0.909658	1	0.994588	1	1.05932	1	3	2085.18	-1.01654
dANVNLSSQLPk	B8BEL1	N-Term(iTRAQ8plex); K12(iTRAQ8plex)	32.04	0.747686	1	0.737334	1	0.5926	1	0.902613	1	1.03902	1	0.856033	1	2	1894.08	-3.31672
dAPADPIVMR	B8AK12	N-Term(iTRAQ8plex)	32.47	1.12217	1	1.34104	1	1.42063	1	1.09414	1	1.09972	1	1.20387	1	3	1388.75	-2.33733
dAPADPIVmR	B8AK12	N-Term(iTRAQ8plex); M9(Oxidation)	3.82	1.07342	1	1.48988	1	1.60751	1	1.15311	1	1.03279	1	1.46386	1	3	1404.75	0.0274049
dAPAGEkPEPVR	Q0D852	N-Term(iTRAQ8plex); K7(iTRAQ8plex)	15.61	0.890084	2	0.888092	2	0.848881	2	1.05133	2	1.17527	2	1.03976	2	3	1874.05	-4.04013
dAPEAEASGEAAGGR	B8BH17	N-Term(iTRAQ8plex)	88.15	1.00954	11	0.984432	11	0.974198	11	0.972627	11	1.0077	11	1.07681	11	3	1691.81	0.0334912
dAPEAEASGEAAGGRR	B8BH17	N-Term(iTRAQ8plex)	12.69	0.876484	1	1.1623	1	0.942268	1	0.984744	1	0.851494	1	0.945693	1	3	1847.91	-0.291375
dAPMFVcGVNEDk	Q0J8A4	N-Term(iTRAQ8plex); C7(Carbamidomethyl); K13(iTRAQ8plex)	50.05	1.05836	2	0.979184	2	0.983737	2	0.940323	2	0.934498	2	0.923633	2	3	2090.05	-0.779351
dAPmFVcGVNEDk	Q0J8A4	N-Term(iTRAQ8plex); M4(Oxidation); C7(Carbamidomethyl); K13(iTRAQ8plex)	42.81	1.05509	1	0.834441	1	0.885625	1	0.942414	1	0.951833	1	0.933396	1	3	2106.04	-4.73478
dAPMFVVGVNEk	Q7FAH2;Q6K5G8	N-Term(iTRAQ8plex); K12(iTRAQ8plex)	64.41													2	1914.06	-2.92337
dAPPLESVGPQk	Q6Z4F3	N-Term(iTRAQ8plex); K12(iTRAQ8plex)	30.69	0.824312	1	0.785272	1	0.825746	1	0.970955	1	1.06074	1	1.00094	1	2	1846.04	-5.45218
dAPVIGAFNPVk	Q6H547	N-Term(iTRAQ8plex); K12(iTRAQ8plex)	53.57	0.933177	2	0.948764	2	0.953327	2	0.998812	2	1.03005	2	0.953964	2	2	1836.09	0.554025
dAQADVGDVDVPGVR	Q5Z589	N-Term(iTRAQ8plex)	32.62	0.971876	1	1.09735	1	1.14595	1	0.771747	1	0.931976	1	1.01757	1	2	1816.94	1.29988
dAQGQAVAR	Q6K8R0	N-Term(iTRAQ8plex)	32.48	1.0774	1	1.18717	1	1.26167	1	1.05038	1	0.978421	1	1.06331	1	2	1219.67	-2.56611
dAQIFEQFAk	B9FW14	N-Term(iTRAQ8plex); K10(iTRAQ8plex)	52.55	0.941619	110	0.910121	110	0.906719	110	0.988517	110	1.01736	110	0.955343	110	2	1805	-2.21658
dASAQSPLR	A3ADU2	N-Term(iTRAQ8plex)	5.52	1.01209	1	0.870022	1	0.847909	1	0.923158	1	0.997261	1	0.981939	1	2	1248.68	-4.20941
dASDLQPSTGEAASADIHR	A2XXG5	N-Term(iTRAQ8plex)	50.54	1.19139	1	1.1624	1	1.15404	1	0.820684	1	0.84575	1	0.864085	1	3	2245.1	-0.164733
dASGEAAcVAAAAR	C7IZL4	N-Term(iTRAQ8plex); C8(Carbamidomethyl)	44.68	1.00572	2	1.06073	2	1.0957	2	1.09377	2	1.1182	2	1.17732	2	2	1623.8	-0.879497
dASGTVSVADLR	Q84VG0	N-Term(iTRAQ8plex)	28.62	0.962715	4	0.933026	4	0.929396	4	1.02775	4	1.0114	4	1.0116	4	2	1494.8	-5.97156
dASLEALPVDELIEk	Q7XPY2	N-Term(iTRAQ8plex); K15(iTRAQ8plex)	83.23	0.967714	117	0.88854	117	0.940192	117	1.00237	117	1.05115	117	0.998979	117	2	2250.27	-0.489469
dASQELAEQIR	Q8GSZ9	N-Term(iTRAQ8plex)	42.44	1.00751	2	1.02381	2	1.03617	2	0.933358	2	0.975808	2	1.00042	2	2	1563.82	-2.33586
dASSIDSEINEASk	B9G7S6	N-Term(iTRAQ8plex); K14(iTRAQ8plex)	71.54	0.989431	2	0.890554	2	0.846697	2	0.883891	2	0.93437	2	0.829732	2	2	2074.07	-3.45507
dATDAAQQWPFLTDALTk	B9EUU5	N-Term(iTRAQ8plex); K18(iTRAQ8plex)	13.59	0.939409	1	0.908213	1	0.739706	1	0.920604	1	1.01676	1	0.949671	1	4	2600.39	3.38885
dATDDFEDVGHSTTAR	P49100;Q94DH6	N-Term(iTRAQ8plex)	61.89													3	2040.94	-2.21007
dATDHTDSASk	Q84Z60	N-Term(iTRAQ8plex); K11(iTRAQ8plex)	11.06	1.27193	1	1.26579	1	0.949912	1	1.00567	1	0.843309	1	0.737724	1	3	1755.89	-4.55674
dATkPEDEH	Q84J55	N-Term(iTRAQ8plex); K4(iTRAQ8plex)	2.14	1.03911	2	0.858678	2	0.798679	2	0.880047	2	0.775175	2	0.742446	2	3	1649.85	-3.74086
dATLFQHQQSVER	Q7XEH4	N-Term(iTRAQ8plex)	48.18	1.25186	1	1.40294	1	1.2417	1	1.25762	1	0.961533	1	1.05168	1	3	1862.96	-1.75821
dATNDFEDIGHSESAR	Q7XCR6	N-Term(iTRAQ8plex)	81.35	1.11263	5	1.14786	5	1.13058	5	1.04455	5	0.916708	5	0.898479	5	2	2067.95	0.848046
dATNVEk	P40392	N-Term(iTRAQ8plex); K7(iTRAQ8plex)	15.6	0.894717	1	0.807161	1	0.722384	1	0.898269	1	0.990893	1	0.902938	1	2	1384.78	-6.25812
dATQVVANLQR	B9FY47	N-Term(iTRAQ8plex)	21.28	1.2727	2	1.22641	2	1.2391	2	0.954557	2	0.993457	2	1.06257	2	2	1518.85	0.30981
dATTYQDGcIVR	B8B6Y8	N-Term(iTRAQ8plex); C9(Carbamidomethyl)	22.34	0.78336	2	1.08442	2	1.01815	2	1.35015	2	1.39797	2	1.59467	2	3	1702.83	-2.66588
dATVQLASDk	Q337B2	N-Term(iTRAQ8plex); K10(iTRAQ8plex)	22.78	0.921061	1	0.776131	1	0.886018	1	0.784924	1	0.904312	1	0.801878	1	2	1655.94	-1.2658
dAVDAAGGGGGGGAVDR	Q703H1	N-Term(iTRAQ8plex)	24.23	1.07257	1	1.5159	1	1.65154	1	1.69725	1	1.43892	1	2.37572	1	2	1705.84	0.909495
dAVEVLHGR	B8AXK3	N-Term(iTRAQ8plex)	7.47	1.06644	4	1.20444	4	1.06769	4	1.17871	4	1.05319	4	1.18439	4	2	1299.74	3.61979
dAVITLQNVLEGk	Q8GU51	N-Term(iTRAQ8plex); K13(iTRAQ8plex)	35.87	0.981555	18	0.934919	18	0.953792	18	1.0054	18	0.99083	18	1.01531	18	3	2008.19	-2.33867
dAVLANEEAR	A2X9Q4	N-Term(iTRAQ8plex)	29.75	1.0012	3	0.991893	3	0.936521	3	0.929905	3	0.930623	3	0.96761	3	2	1391.74	-2.6598
dAVLANEVAR	A2YAT3	N-Term(iTRAQ8plex)	27.65	0.92497	2	0.861731	2	0.93021	2	0.865452	2	0.908373	2	0.942792	2	2	1361.76	-3.21294
dAVLDGGIPFNk	Q6ZD89	N-Term(iTRAQ8plex); K12(iTRAQ8plex)	38.21	1.03493	2	0.955088	2	0.896665	2	0.853836	2	0.857656	2	0.857952	2	2	1854.05	-3.36766
dAVLLQQQQSLAk	Q7XEH4	N-Term(iTRAQ8plex); K13(iTRAQ8plex)	23.44	0.899594	1	0.880242	1	0.873349	1	1.02252	1	1.01879	1	1.03617	1	3	2050.21	-0.861983
dAVLLVFANk	P51823	N-Term(iTRAQ8plex); K10(iTRAQ8plex)	19.93	1.07489	52	1.12719	52	1.01685	52	1.03096	52	0.946253	52	0.949078	52	3	1698.04	-1.65434
dAVQIITk	Q9AUQ4	N-Term(iTRAQ8plex); K8(iTRAQ8plex)	24.36	0.908999	1	0.860753	1	0.824064	1	0.934088	1	0.968186	1	0.881518	1	2	1495.92	-4.2124
dAVTVAVPLLk	Q9FTP2	N-Term(iTRAQ8plex); K11(iTRAQ8plex)	16.43	0.967512	1	0.855584	1	0.862299	1	0.999946	1	1.08056	1	0.939677	1	2	1734.09	-3.24561
dAVTYTEHAR	B9FJJ7	N-Term(iTRAQ8plex)	21.47	1.09747	2	1.03333	2	1.09631	2	0.910167	2	0.89051	2	0.937545	2	2	1466.75	-2.52769
dAVVAHLR	B9EXE9	N-Term(iTRAQ8plex)	17.63	1.14461	4	1.37927	4	1.14633	4	1.07318	4	0.925162	4	1.03798	4	3	1184.7	-2.60629
dAVVAVPPYFGQAER	B9F2B8	N-Term(iTRAQ8plex)	23.29	1.13599	1	1.17272	1	1.32771	1	1.14576	1	1.2474	1	1.25406	1	3	1923.03	1.32464
dAWITNALFcPk	Q6ZFK0	N-Term(iTRAQ8plex); C10(Carbamidomethyl); K12(iTRAQ8plex)	0.33	0.92156	1	0.99981	1	1.0911	1	1.28511	1	1.10301	1	1.1881	1	3	2044.12	1.74301
dAYEVVR	A2WRH8	N-Term(iTRAQ8plex)	6.39	1.01728	1	1.06117	1	1.26129	1	0.904519	1	0.922195	1	0.992152	1	2	1155.63	-1.26773
dAYVGDEAQAk	Q75HX0	N-Term(iTRAQ8plex); K11(iTRAQ8plex)	56.32	0.993909	1	1.04081	1	0.820639	1	0.882197	1	0.937698	1	0.75469	1	2	1774.93	-6.33767
dAYVGDEAQSk	A2XNS1;P0C539;Q65XH8;Q67G20;A2XLF2;A2ZID5;P0C542	N-Term(iTRAQ8plex); K11(iTRAQ8plex)	61.89													3	1790.93	-3.58278
dAyVGDEAQSk	A2XNS1;P0C539;Q65XH8;Q67G20;A2XLF2;A2ZID5;P0C542	N-Term(iTRAQ8plex); Y3(iTRAQ8plex); K11(iTRAQ8plex)	10.96													3	2095.13	-5.23636
dccAGLGQVVAGSk	Q75HK2	N-Term(iTRAQ8plex); C2(Carbamidomethyl); C3(Carbamidomethyl); K14(iTRAQ8plex)	77.25	0.860846	9	0.897691	9	0.850035	9	1.07736	9	1.16655	9	0.989919	9	2	2030.06	0.59045
dccAGVk	A2YNW1	N-Term(iTRAQ8plex); C2(Carbamidomethyl); C3(Carbamidomethyl); K7(iTRAQ8plex)	29.9	1.16081	3	1.16604	3	1.03193	3	1.20506	3	1.06198	3	1.26079	3	2	1417.74	1.30411
dcEEWFFDR	Q8GTK8	N-Term(iTRAQ8plex); C2(Carbamidomethyl)	2.77	1.07658	2	0.821668	2	0.922059	2	1.00629	2	0.987178	2	1.0564	2	2	1607.7	-4.39304
dcMETcSQSGDR	A3CE45	N-Term(iTRAQ8plex); C2(Carbamidomethyl); C6(Carbamidomethyl)	47.53	0.928902	1	0.792132	1	0.665395	1	0.914981	1	0.97256	1	0.982242	1	2	1749.71	-1.12553
dcPPMTVTYR	B9G2A8;B8BD82	N-Term(iTRAQ8plex); C2(Carbamidomethyl)	7.44													2	1543.75	-1.35256
dcQPVASSSEPPR	A2ZNR3	N-Term(iTRAQ8plex); C2(Carbamidomethyl)	34.09	1.00913	1	1.14271	1	1.02376	1	1.0954	1	0.830006	1	1.18547	1	3	1733.84	0.637349
dcSQGGGGGGGYGGGGGGYR	Q84UR8	N-Term(iTRAQ8plex); C2(Carbamidomethyl)	63.03	1.08956	1	1.17662	1	1.39186	1	1.15582	1	0.91025	1	1.04077	1	3	2036.87	-2.46513
dcWLIIAGk	Q7XCR6	N-Term(iTRAQ8plex); C2(Carbamidomethyl); K9(iTRAQ8plex)	17.49	1.07826	3	1.12216	3	0.929024	3	0.942777	3	1.06311	3	0.921709	3	3	1683.97	-2.2286
dDADDPHDIPk	A3A5A7	N-Term(iTRAQ8plex); K11(iTRAQ8plex)	12.31	1.33644	1	1.30895	1	1.09136	1	1.13588	1	1.0449	1	1.10297	1	3	1845.94	-4.38592
dDADWSTLGVk	B9EXH0	N-Term(iTRAQ8plex); K11(iTRAQ8plex)	10.1	1.02308	1	0.899189	1	0.917356	1	0.966446	1	1.05024	1	0.986337	1	3	1814.97	-4.92682
dDAEEEEEVER	B7ES13	N-Term(iTRAQ8plex)	45.68	0.995902	1	0.88093	1	1.09606	1	0.928893	1	1.08847	1	0.955237	1	2	1653.73	-4.53651
dDAEEEEEVERR	B7ES13	N-Term(iTRAQ8plex)	26.88	1.0432	1	1.04337	1	1.0348	1	0.987182	1	0.932737	1	0.988332	1	3	1809.84	1.99356
dDALAVVDDDDGGDHR	Q5N747	N-Term(iTRAQ8plex)	40.07	1.23846	4	1.53209	4	1.15921	4	1.31417	4	0.881997	4	0.984559	4	3	1988.9	-3.17344
dDcWLIIGGk	P49100;Q94DH6	N-Term(iTRAQ8plex); C3(Carbamidomethyl); K10(iTRAQ8plex)	30.43													2	1784.98	-3.46746
dDDGETPLIHATR	Q75M28	N-Term(iTRAQ8plex)	23.94	1.2174	1	1.86111	1	1.27757	1	1.157	1	0.891906	1	1.10602	1	3	1743.88	-2.36644
dDDLTTQIGk	B9FVM6	N-Term(iTRAQ8plex); K10(iTRAQ8plex)	28.3	1.05882	1	1.03914	1	1.04189	1	1.09581	1	1.09414	1	0.998417	1	2	1713.94	-5.1325
dDELLEAEDk	Q7XEH4	N-Term(iTRAQ8plex); K10(iTRAQ8plex)	45.65	0.937903	1	0.895168	1	0.938862	1	1.15558	1	1.2507	1	1.1104	1	2	1784.94	-0.829506
dDENVNSQPFMR	Q0IPF7;P0C510	N-Term(iTRAQ8plex)	35.23													2	1755.82	-1.64641
dDENVNSQPFmR	Q0IPF7;P0C510	N-Term(iTRAQ8plex); M11(Oxidation)	21.81													3	1771.82	-1.80061
dDEVQVVR	Q2QXN5	N-Term(iTRAQ8plex)	21.44	0.914845	2	1.05488	2	1.03919	2	1.10915	2	1.10999	2	1.13818	2	2	1263.68	-3.0289
dDFGGQTVLPVSDLIPGIR	Q6Z3Y9	N-Term(iTRAQ8plex)	86.55	1.09145	17	1.00917	17	1.22238	17	1.03464	17	1.06434	17	1.22066	17	2	2303.26	1.05091
dDFIEkDR	P0C510	N-Term(iTRAQ8plex); K6(iTRAQ8plex)	4.02	0.813	4	0.866693	4	0.805552	4	1.04274	4	1.07955	4	1.02689	4	3	1645.9	-0.323673
dDGDFDDDEPR	Q01JZ7	N-Term(iTRAQ8plex)	46.41	1.0683	1	0.824402	1	0.893974	1	0.854293	1	1.03669	1	0.970796	1	2	1599.67	-2.80412
dDGLPPVPAR	A2ZZZ5	N-Term(iTRAQ8plex)	20.8	1.04469	1	1.21436	1	1.32051	1	0.93635	1	0.989208	1	1.11157	1	2	1340.75	-0.367995
dDGSGANSAVQEDAPk	Q10S92	N-Term(iTRAQ8plex); K16(iTRAQ8plex)	39.86	1.02176	1	0.944493	1	0.746685	1	0.920813	1	1.08978	1	0.834202	1	3	2169.08	-5.14684
dDILLDcGATGk	Q94EF4	N-Term(iTRAQ8plex); C7(Carbamidomethyl); K12(iTRAQ8plex)	39.66	0.912236	2	0.861608	2	0.885377	2	1.12232	2	1.24428	2	1.09317	2	2	1886.01	-0.347545
dDIScIVIR	Q7FAK8	N-Term(iTRAQ8plex); C5(Carbamidomethyl)	6.36	1.01212	1	0.941977	1	1.07057	1	1.02099	1	1.02209	1	1.06955	1	2	1394.76	-3.24766
dDIScVVVR	Q7XQU7	N-Term(iTRAQ8plex); C5(Carbamidomethyl)	14.27	0.937996	1	1.00996	1	1.00207	1	1.06498	1	1.11249	1	1.06439	1	2	1366.72	-5.06401
dDISILHGR	Q6Z3Y9	N-Term(iTRAQ8plex)	35.97	0.994639	48	1.0515	48	1.00869	48	0.984705	48	0.954119	48	0.967208	48	2	1329.74	0.82932
dDISLPDSSTPR	A3AY29	N-Term(iTRAQ8plex)	22.79	0.713789	1	0.735581	1	0.868148	1	1.1471	1	1.1652	1	1.22587	1	2	1606.82	-2.24293
dDLLSTVTNNR	Q6ZBX8	N-Term(iTRAQ8plex)	7.73	1.02325	4	1.05651	4	1.03931	4	0.943539	4	0.963668	4	0.946007	4	2	1551.82	-4.39272
dDNPEGIEAR	A2Y0Q8	N-Term(iTRAQ8plex)	34.18	1.06894	1	0.90861	1	0.986633	1	1.00571	1	0.964679	1	1.01402	1	2	1419.7	-3.06122
dDPNLGIk	B8APC4;B9FW14	N-Term(iTRAQ8plex); K8(iTRAQ8plex)	26.49													2	1479.86	-1.83014
dDPTNYENQLEELk	Q8S6N5	N-Term(iTRAQ8plex); K14(iTRAQ8plex)	27.55	0.936265	1	0.781537	1	0.775663	1	0.809108	1	0.836113	1	0.848121	1	3	2316.17	-4.72931
dDQGSGHLVDk	Q9LI00	N-Term(iTRAQ8plex); K11(iTRAQ8plex)	47.43	1.16758	2	1.1635	2	1.27459	2	0.935985	2	0.827173	2	0.879679	2	2	1778.94	-5.18299
dDQLEYLEER	A2Z2G1;A2YWQ1	N-Term(iTRAQ8plex)	52.23													2	1613.8	0.609351
dDSDFAEk	A3BP16	N-Term(iTRAQ8plex); K8(iTRAQ8plex)	23.1	0.830312	1	0.751674	1	0.728989	1	1.05854	1	1.07149	1	0.947763	1	2	1534.78	-4.90375
dDSGVLSPYNFSR	Q6ERW9	N-Term(iTRAQ8plex)	47.74	1.00926	5	0.978264	5	1.04785	5	0.8866	5	0.942722	5	0.875769	5	2	1760.87	-2.80325
dDSIFHNEEk	A2YQL4	N-Term(iTRAQ8plex); K10(iTRAQ8plex)	37.49	0.920492	6	0.922119	6	0.926015	6	0.913691	6	0.878771	6	0.824053	6	2	1841.94	-3.76076
dDTGAAVR	Q2R0I1	N-Term(iTRAQ8plex)	24.45	0.922342	1	0.742334	1	0.773647	1	0.978805	1	0.970911	1	0.974046	1	2	1108.59	-2.76897
dDTGHLk	Q5JNI4	N-Term(iTRAQ8plex); K7(iTRAQ8plex)	17.19	0.969393	1	0.982059	1	0.990487	1	1.02697	1	1.17751	1	1.09547	1	3	1393.79	-2.43533
dDTLLDFYNk	Q6ZBX8	N-Term(iTRAQ8plex); K10(iTRAQ8plex)	50.2	1.08436	1	1.11415	1	1.11948	1	0.953653	1	0.984216	1	0.908177	1	2	1851.99	-0.500659
dDVGGNMVDAFR	Q6ZGX8	N-Term(iTRAQ8plex)	45.06	1.06919	3	1.07404	3	1.24435	3	1.11736	3	0.986892	3	1.17238	3	3	1599.77	-1.34934
dDVSAVk	P40393;Q6AUF8	N-Term(iTRAQ8plex); K7(iTRAQ8plex)	14.56													2	1341.78	-2.49251
dDVVIQFLNPk	Q84VF2	N-Term(iTRAQ8plex); K11(iTRAQ8plex)	23.53	0.893758	5	0.867706	5	0.871701	5	1.04616	5	1.13032	5	1.00714	5	3	1896.1	-4.26786
dDVVIQFQNPk	Q84VF8	N-Term(iTRAQ8plex); K11(iTRAQ8plex)	16.4	1.12364	1	1.06908	1	1.04449	1	0.86711	1	0.951358	1	0.924816	1	2	1911.07	-3.05757
dDYPYTGAAAAAcDR	A2Z431	N-Term(iTRAQ8plex); C13(Carbamidomethyl)	37.62	1.09153	2	1.12703	2	1.22062	2	0.867648	2	0.981641	2	0.923319	2	3	1920.87	1.57985
dEAAQAAIDk	Q6YYV1	N-Term(iTRAQ8plex); K10(iTRAQ8plex)	35.66	0.92055	2	0.797641	2	0.824927	2	0.892694	2	0.965175	2	0.877593	2	2	1639.9	-4.00797
dEADVAADVk	B9FHE1	N-Term(iTRAQ8plex); K10(iTRAQ8plex)	54.56	0.979712	1	0.814753	1	0.839352	1	0.944933	1	0.964279	1	0.847596	1	2	1640.89	-3.34286
dEAFEIWSk	Q10BJ6	N-Term(iTRAQ8plex); K9(iTRAQ8plex)	14.88	0.96724	8	0.96222	8	0.908428	8	0.918841	8	0.993282	8	0.92167	8	3	1732.93	-3.2534
dEAVGVAAAAER	Q6K4P5	N-Term(iTRAQ8plex)	47.81	1.09249	3	1.00033	3	1.18407	3	0.977297	3	1.09932	3	1.12023	3	2	1462.78	-2.87854
dEAYFAANAAAQASR	Q2QLY5	N-Term(iTRAQ8plex)	15.84	0.955566	8	1.03277	8	1.07053	8	0.998153	8	1.02666	8	1.00829	8	2	1859.91	-3.74018
dEAYFAANTAAQASR	H2KWU8	N-Term(iTRAQ8plex)	56.17	1.04526	7	1.00235	7	1.10574	7	0.966098	7	1.00277	7	0.919759	7	3	1889.93	-0.329697
dEDDEEALR	A3BXL8	N-Term(iTRAQ8plex)	16.05	0.945129	1	0.868464	1	0.856075	1	0.972069	1	1.05856	1	1.12417	1	2	1395.65	-4.15454
dEEGYPAFALVNk	Q6Z4N7;O24212	N-Term(iTRAQ8plex); K13(iTRAQ8plex)	19.33													3	2061.1	-3.3856
dEEGYPAFALVNR	Q10M12	N-Term(iTRAQ8plex)	49.83	0.882199	9	0.839338	9	1.02632	9	1.22514	9	1.15455	9	1.25337	9	3	1784.91	-0.734236
dEEGYPAmALVNk	Q9FTY4	N-Term(iTRAQ8plex); M8(Oxidation); K13(iTRAQ8plex)	19.33													3	2061.1	12.6277
dEEVDYFPSR	Q10S82	N-Term(iTRAQ8plex)	15.91	0.890871	1	0.816333	1	0.946383	1	0.991211	1	0.963275	1	1.04388	1	2	1560.75	-1.82624
dEEVDYYPSR	A3REN3	N-Term(iTRAQ8plex)	27.21	1.00987	6	0.867471	6	0.971934	6	0.990309	6	1.09279	6	1.19304	6	2	1576.74	-1.82481
dEEVDyYPSR	A3REN3	N-Term(iTRAQ8plex); Y6(iTRAQ8plex)	0.65	0.952987	1	0.85784	1	0.80523	1	1.12657	1	1.28625	1	1.10935	1	3	1880.94	-2.01119
dEEVNYFPSR	A2YH64	N-Term(iTRAQ8plex)	22.13	0.891859	2	0.947249	2	0.914264	2	1.09659	2	1.18673	2	1.15041	2	2	1559.76	-1.66368
dEFDAQMTk	Q0D840	N-Term(iTRAQ8plex); K9(iTRAQ8plex)	35.16	1.04607	1	0.965567	1	1.04478	1	1.10041	1	1.08051	1	0.995085	1	2	1692.87	-2.50563
dEFSLETR	Q8RZ83	N-Term(iTRAQ8plex)	13.52	0.933877	3	0.875226	3	0.924844	3	1.02011	3	1.04998	3	1.00186	3	2	1300.66	-6.88553
dEFVAQR	A2Y3G2	N-Term(iTRAQ8plex)	9.35	1.19494	1	1.18638	1	1.21379	1	0.906714	1	0.954649	1	1.10789	1	2	1168.63	-0.017908
dEGLTLLQR	Q6AVV6	N-Term(iTRAQ8plex)	31.28	0.908889	5	0.835921	5	0.935222	5	1.06817	5	1.00879	5	1.11849	5	2	1348.77	-1.96144
dEHFAPLFEQIAk	Q6YZD2	N-Term(iTRAQ8plex); K13(iTRAQ8plex)	10.5	1.04794	1	1.11937	1	0.957084	1	1.02684	1	1.06152	1	0.975524	1	4	2153.18	-1.79557
dEHLDPINVk	A2XLX1	N-Term(iTRAQ8plex); K10(iTRAQ8plex)	19.76	0.938967	1	0.930047	1	0.869899	1	1.00936	1	1.13758	1	1.05708	1	3	1788	-4.23158
dEHLFk	P53683	N-Term(iTRAQ8plex); K6(iTRAQ8plex)	10.96	1.0102	1	1.2439	1	1.05382	1	1.09648	1	1.12518	1	1.04039	1	3	1396.8	-0.85479
dEINSLk	Q7XEH4	N-Term(iTRAQ8plex); K7(iTRAQ8plex)	15.41	0.934246	1	0.863246	1	0.779887	1	1.03749	1	1.14399	1	0.995097	1	2	1426.83	-5.61294
dEIVEYASR	Q657L8	N-Term(iTRAQ8plex)	5.94	1.05597	3	1.02522	3	1.07703	3	0.931938	3	0.92051	3	0.948042	3	2	1385.72	-0.138769
dELESALIEHEMGDTSTIk	P53683	N-Term(iTRAQ8plex); K19(iTRAQ8plex)	61.83	1.03657	19	0.974406	19	1.02263	19	1.01739	19	1.04815	19	1.01638	19	3	2726.39	-2.5326
dELESALIEHEmGDTSTIk	P53683	N-Term(iTRAQ8plex); M12(Oxidation); K19(iTRAQ8plex)	29.09	1.08674	2	1.20116	2	1.08289	2	1.08715	2	0.921746	2	1.06043	2	4	2742.39	-2.87187
dELGYEPIVSLk		N-Term(iTRAQ8plex); K12(iTRAQ8plex)	1.53													3	1971.13	0.117438
dELTLEGIk	P35683;A2WT17	N-Term(iTRAQ8plex); K9(iTRAQ8plex)	39.5													2	1625.95	-5.23225
dEMIDIIGVTk	P35684	N-Term(iTRAQ8plex); K11(iTRAQ8plex)	60.66	0.936334	12	0.870922	12	0.864486	12	0.948327	12	0.966467	12	0.903969	12	2	1842.04	-3.96025
dESIAALPVDDLIEk	Q8L6I1	N-Term(iTRAQ8plex); K15(iTRAQ8plex)	20.99	0.900791	5	0.842596	5	0.890868	5	1.06882	5	1.1884	5	1.08331	5	3	2236.25	0.0857936
dESTDQLLVPR	B9F2B8	N-Term(iTRAQ8plex)	12.56	1.02676	2	1.18453	2	1.13348	2	0.955829	2	0.953647	2	1.05024	2	2	1576.84	-3.09976
dETDARPSIVEVMR	Q5JN27	N-Term(iTRAQ8plex)	24.14	1.05964	6	1.2073	6	1.09122	6	1.00227	6	0.995152	6	0.983295	6	3	1921.99	-1.57361
dETDARPSMTEIVR	B8AZB0	N-Term(iTRAQ8plex)	2.49	1.09894	2	1.29236	2	1.02886	2	1.29462	2	1.0686	2	1.05955	2	3	1923.97	-0.753394
dETEYTVLAR	Q6Z6L4	N-Term(iTRAQ8plex)	13.77	1.38404	2	1.42833	2	1.84643	2	1.11417	2	1.10062	2	1.3209	2	2	1500.78	-2.71462
dETYSGDGIALFR	Q10L71	N-Term(iTRAQ8plex)	22.2	1.07613	1	1.07344	1	1.16259	1	1.0642	1	1.17807	1	1.13005	1	3	1747.87	-3.77419
dEVMESGGAAGEFAAk	Q8H5N9	N-Term(iTRAQ8plex); K16(iTRAQ8plex)	83.95	0.994116	122	0.993525	122	0.91624	122	1.02602	122	1.0691	122	1.01487	122	2	2177.1	0.603068
dEVVIHSIR	B9GBA5;B9GD70	N-Term(iTRAQ8plex)	21.67													3	1371.79	-2.73104
dEYDESGPAIVHR	Q65XH8	N-Term(iTRAQ8plex)	52.27	1.62102	2	1.69046	2	1.35635	2	1.30043	2	0.892662	2	0.940112	2	3	1791.88	-3.52371
dEYSQWVVASQR	Q7X7K8	N-Term(iTRAQ8plex)	29.02	0.902261	1	0.856958	1	0.973639	1	1.0624	1	0.954604	1	0.908304	1	2	1771.89	0.389574
dFASSIYR	Q0D9G9	N-Term(iTRAQ8plex)	7.1	0.912457	3	0.926603	3	0.945523	3	0.994323	3	0.996879	3	0.942815	3	2	1262.67	-2.12753
dFDEPGSLAPTGLFLGGTk	P83647	N-Term(iTRAQ8plex); K19(iTRAQ8plex)	62.48	1.05185	22	0.98364	22	0.951647	22	0.895538	22	0.94522	22	0.881369	22	2	2530.37	2.22962
dFDEVLFk	Q9AQZ5;A2Y116	N-Term(iTRAQ8plex); K8(iTRAQ8plex)	14.06													3	1620.9	-3.21634
dFDVTALEk	K4FHN8	N-Term(iTRAQ8plex); K9(iTRAQ8plex)	41.69	0.896665	7	1.02154	7	0.973628	7	1.24514	7	1.28916	7	1.14351	7	2	1645.92	-3.95174
dFEENGSMER	Q93W07	N-Term(iTRAQ8plex)	23.04	0.904277	3	0.699812	3	0.811362	3	0.930147	3	0.920573	3	0.958083	3	3	1517.68	-0.985253
dFEENGSmER	Q93W07	N-Term(iTRAQ8plex); M8(Oxidation)	24.89	0.966953	1	0.80498	1	0.981911	1	0.967922	1	0.940861	1	0.973975	1	2	1533.68	-1.49102
dFEQNNYASSHQR	B8BMR0	N-Term(iTRAQ8plex)	43.05	0.997908	1	1.04382	1	0.993354	1	0.94585	1	0.899611	1	1.0411	1	3	1899.89	-0.554175
dFEQQmELVGR	Q0JPG8;Q94DU4	N-Term(iTRAQ8plex); M6(Oxidation)	13.52													2	1671.82	-7.20339
dFEYSSEAQESR	Q6L4R5	N-Term(iTRAQ8plex)	65.08	1.03289	8	0.927663	8	0.995242	8	0.91606	8	0.993245	8	0.996988	8	2	1751.8	-2.54481
dFFSEEQPk	B9FXT0	N-Term(iTRAQ8plex); K9(iTRAQ8plex)	17.3	1.06091	2	1.02859	2	1.01999	2	0.951989	2	1.01843	2	1.0264	2	2	1734.92	1.57091
dFFVEYDR	B8ANH1	N-Term(iTRAQ8plex)	4.26	0.980784	1	0.896597	1	0.95985	1	1.00026	1	1.09001	1	1.03908	1	2	1394.68	-4.30499
dFGEESEGLNIVQDYVk	Q8H2J8	N-Term(iTRAQ8plex); K17(iTRAQ8plex)	39.28	1.03457	1	0.939172	1	0.875404	1	1.0983	1	1.07922	1	1.15063	1	3	2550.31	-4.03546
dFGGVScYPASGAVQR	A2Z9M8	N-Term(iTRAQ8plex); C7(Carbamidomethyl)	9.11	1.04504	2	1.15883	2	1.1818	2	1.01609	2	1.12402	2	1.1982	2	3	1974.96	-1.94322
dFGSAVWDMIR	Q75LD9	N-Term(iTRAQ8plex)	7.02	1.06564	2	0.944047	2	1.08445	2	0.961596	2	0.964591	2	0.998037	2	3	1600.82	3.4522
dFGTQENQLk	Q8L6I2	N-Term(iTRAQ8plex); K10(iTRAQ8plex)	48.23	1.00297	1	0.951236	1	0.911612	1	0.938311	1	0.96727	1	0.835472	1	2	1787.97	-2.47587
dFGYSFPcDGPGR	P0C356	N-Term(iTRAQ8plex); C8(Carbamidomethyl)	23.27	0.786503	1	0.796923	1	0.949414	1	0.986412	1	0.982505	1	1.00298	1	2	1778.81	-0.167953
dFLAATTNSPEk	A2YNY6	N-Term(iTRAQ8plex); K12(iTRAQ8plex)	25.19	1.11147	1	1.17168	1	0.948988	1	0.837226	1	0.927573	1	0.857277	1	2	1902.04	-1.41562
dFLDAVNk	A3B973	N-Term(iTRAQ8plex); K8(iTRAQ8plex)	48.68	0.900538	1	0.832047	1	0.860541	1	1.06286	1	1.07184	1	0.982381	1	2	1529.87	-3.46227
dFLGAATNPADMER	Q7X8H4	N-Term(iTRAQ8plex)	57.37	1.1403	3	1.0875	3	1.1475	3	0.9171	3	0.923423	3	0.920907	3	2	1811.89	-2.20068
dFLGAATNPADmER	Q7X8H4	N-Term(iTRAQ8plex); M12(Oxidation)	29.22	1.14355	2	1.20399	2	1.26895	2	1.09746	2	1.18519	2	1.19793	2	3	1827.88	-1.61068
dFLPFLQR	Q6H547	N-Term(iTRAQ8plex)	6.03	1.03281	1	0.914954	1	1.03994	1	1.31391	1	0.975984	1	1.01551	1	3	1339.77	0.737097
dFLVQSk	A3AHY0	N-Term(iTRAQ8plex); K7(iTRAQ8plex)	5.27	0.868048	1	0.812704	1	0.819945	1	0.938574	1	1.00439	1	0.943256	1	2	1444.86	-0.34848
dFMIQGGDFDk	Q75M32	N-Term(iTRAQ8plex); K11(iTRAQ8plex)	46.8	0.837725	1	0.689471	1	0.767236	1	0.940344	1	0.97349	1	0.887078	1	2	1880.97	-0.702468
dFNIQDEAGGVHR	B8AEK1	N-Term(iTRAQ8plex)	0.71	1.41536	1	2.04888	1	1.69469	1	1.40332	1	1.01763	1	1.16155	1	3	1761.88	0.499178
dFNPNEMAR	Q0DJW8	N-Term(iTRAQ8plex)	16.67	0.852926	2	0.825937	2	0.892567	2	1.0568	2	1.02674	2	1.05591	2	2	1397.67	-2.98875
dFNPNEmAR	Q0DJW8	N-Term(iTRAQ8plex); M7(Oxidation)	11.86	0.799165	1	0.846547	1	0.740702	1	1.08042	1	1.14578	1	1.03556	1	2	1413.67	-2.29381
dFNSYGSR	B9FAY8;Q6YZX6	N-Term(iTRAQ8plex)	6.8													2	1249.61	-4.57009
dFPLAVYSVDk	B9FLM2	N-Term(iTRAQ8plex); K11(iTRAQ8plex)	65.09	0.898601	99	0.808388	99	0.817566	99	1.08596	99	1.10145	99	1.02429	99	2	1862.05	-3.3175
dFQHEQQR	Q8W0H6	N-Term(iTRAQ8plex)	9.32	1.00655	1	1.07232	1	0.95719	1	1.02927	1	1.08568	1	1.0082	1	3	1391.69	-2.63696
dFSFPAEEER	B8B0Q4	N-Term(iTRAQ8plex)	34.68	0.931156	2	0.997729	2	1.06023	2	0.957141	2	0.998281	2	1.06001	2	2	1530.73	-2.06735
dFSSVLTTMR	Q8H821	N-Term(iTRAQ8plex)	23.94	1.08892	7	1.08132	7	1.11055	7	0.917941	7	0.920044	7	0.988796	7	2	1460.77	-1.55966
dFSTAILER	Q10RP0	N-Term(iTRAQ8plex)	12.5	1.15646	3	1.04906	3	1.06135	3	0.793003	3	0.807367	3	0.938237	3	2	1355.74	-5.23802
dFTSSDPYVVVR	A2YYY9	N-Term(iTRAQ8plex)	13.65	1.00592	1	1.09259	1	1.24805	1	1.01983	1	1.05947	1	1.08414	1	2	1688.88	-2.41187
dFVAALQR	B9F773	N-Term(iTRAQ8plex)	27.19	0.91271	1	0.853033	1	0.915442	1	1.10137	1	1.07227	1	1.02075	1	3	1223.7	-4.49805
dFVANLVER	Q69L87	N-Term(iTRAQ8plex)	24.47	1.14338	2	1.07052	2	1.15906	2	0.813418	2	0.818713	2	0.874954	2	2	1366.76	-3.94452
dFVTAVVk	Q6EUS1	N-Term(iTRAQ8plex); K8(iTRAQ8plex)	26.04	0.872754	1	0.778739	1	0.729945	1	0.842835	1	0.925223	1	0.862504	1	3	1486.91	-2.16992
dFYDEVk	A3AQL3	N-Term(iTRAQ8plex); K7(iTRAQ8plex)	21.56	0.816147	1	0.775172	1	0.847447	1	1.08304	1	1.09471	1	1.07188	1	2	1523.81	-4.77584
dFYEQLTDQGFDNR	Q6J2K5	N-Term(iTRAQ8plex)	53.62	0.999003	12	0.874066	12	0.980338	12	1.0095	12	1.10469	12	1.04211	12	2	2051.96	-2.86139
dGAAAAAEEAAAPSVER	Q01HR1	N-Term(iTRAQ8plex)	37.3	1.20666	1	1.19654	1	1.00593	1	1.10673	1	1.08713	1	1.21265	1	3	1889.95	-2.23021
dGAADLEEGTLEIGMEYR	Q93W07	N-Term(iTRAQ8plex)	2.07	0.965754	1	1.00989	1	1.00627	1	1.22997	1	1.35013	1	1.47955	1	3	2273.09	0.669183
dGAFEDVLR	A2XHR1	N-Term(iTRAQ8plex)	17.84	0.870069	5	0.792573	5	0.83592	5	1.01115	5	1.07228	5	1.02208	5	2	1325.69	-5.12355
dGAGIcLPDIR	Q6YY47	N-Term(iTRAQ8plex); C6(Carbamidomethyl)	56.3	0.960412	18	0.961866	18	1.00477	18	1.08013	18	1.04778	18	1.03724	18	2	1490.79	-2.65008
dGAPDSFHFVEDWVR	B7E5F1	N-Term(iTRAQ8plex)	27.87	1.0279	5	1.14645	5	1.06368	5	1.06608	5	0.957695	5	0.993165	5	3	2081	-1.10751
dGASGGVVR	Q9LST9	N-Term(iTRAQ8plex)	13.96	0.916419	1	1.04376	1	1.12731	1	0.427309	1	1.21437	1	0.713826	1	3	1121.62	-1.54561
dGATDPTFLYFSHGLk	P35681	N-Term(iTRAQ8plex); K16(iTRAQ8plex)	51.71	1.06358	72	1.02263	72	0.9855	72	0.987415	72	0.975236	72	0.991023	72	3	2377.26	-3.6953
dGATQEELEEAAR	Q7EZL2	N-Term(iTRAQ8plex)	42.27	0.934284	2	1.02533	2	1.00239	2	1.10309	2	1.22609	2	1.26669	2	2	1722.84	-1.80452
dGAVQTMPATVR	A3C6X2	N-Term(iTRAQ8plex)	22.6	1.23592	1	1.30499	1	1.22728	1	0.759397	1	0.733882	1	0.732047	1	2	1549.83	-2.39588
dGAYASLVQLR	B9EYZ4	N-Term(iTRAQ8plex)	10.33	0.902464	2	0.88695	2	0.990163	2	1.0121	2	0.976065	2	0.989913	2	2	1496.83	-3.60258
dGDGcITTk	A2WN93	N-Term(iTRAQ8plex); C5(Carbamidomethyl); K9(iTRAQ8plex)	6.56	1.66664	1	2.39617	1	1.41452	1	1.55217	1	0.744095	1	0.777208	1	3	1574.83	-3.2796
dGDIEMGMQADPSDNLk	Q7XIE2	N-Term(iTRAQ8plex); K17(iTRAQ8plex)	65.19	0.898943	3	0.863896	3	0.876723	3	1.14762	3	1.21687	3	1.06724	3	2	2444.18	-2.17319
dGDIEmGmQADPSDNLk	Q7XIE2	N-Term(iTRAQ8plex); M6(Oxidation); M8(Oxidation); K17(iTRAQ8plex)	38.74	1.01376	1	0.840497	1	0.869117	1	1.18206	1	1.20016	1	1.08101	1	3	2476.17	-3.66337
dGDIEmGMQADPSDNLk	Q7XIE2	N-Term(iTRAQ8plex); M6(Oxidation); K17(iTRAQ8plex)	38.43	0.896708	3	0.778492	3	0.877366	3	0.891335	3	0.961398	3	0.89157	3	3	2460.18	-3.27319
dGDLLFScAk	Q6YS69	N-Term(iTRAQ8plex); C8(Carbamidomethyl); K10(iTRAQ8plex)	24.76	0.971914	2	0.947936	2	0.940458	2	1.00317	2	1.05181	2	0.981	2	2	1733.91	-12.3416
dGDNMYGVPYDIR	B9F0T1	N-Term(iTRAQ8plex)	29.72	1.01584	2	0.850925	2	0.994959	2	0.891916	2	0.913332	2	0.959569	2	2	1818.86	-1.20276
dGEADIQDPTLEGR	Q5QM84	N-Term(iTRAQ8plex)	7.98	0.947433	1	1.12529	1	0.97486	1	1.13856	1	1.02763	1	1.00171	1	2	1819.9	-1.25833
dGEASDkPIDSAVLSR	P53683	N-Term(iTRAQ8plex); K7(iTRAQ8plex)	51.62	0.989331	5	0.942739	5	0.88328	5	1.14061	5	1.23436	5	1.06155	5	2	2268.22	-2.55488
dGEEGYPGDVTVR	Q10A47	N-Term(iTRAQ8plex)	25.94	1.04598	2	1.11826	2	1.27153	2	1.00323	2	0.887398	2	1.20729	2	3	1697.82	-2.71856
dGEGPIHSMk	B9FDX3	N-Term(iTRAQ8plex); K10(iTRAQ8plex)	6.17	1.0243	1	1.05493	1	0.999887	1	1.00995	1	1.03296	1	0.992673	1	3	1678.9	-3.50866
dGEHGGAFDR	B9F0T2	N-Term(iTRAQ8plex)	32.99	1.37492	2	1.31941	2	1.24197	2	0.655042	2	0.687158	2	0.649519	2	2	1364.65	-2.93396
dGETAIEFAER	A6N1N6	N-Term(iTRAQ8plex)	20.16	1.01275	2	0.950914	2	1.02532	2	1.0113	2	1.01837	2	1.01002	2	2	1541.77	-2.8512
dGEWVDVPPMR	O65030	N-Term(iTRAQ8plex)	19.1	0.978155	2	1.05396	2	1.12003	2	0.972295	2	1.0014	2	1.06602	2	2	1604.8	-3.8035
dGFFcPALAk	Q7F1F2	N-Term(iTRAQ8plex); C5(Carbamidomethyl); K10(iTRAQ8plex)	32.86	0.953532	2	0.928069	2	0.868658	2	0.934067	2	0.931707	2	0.906151	2	2	1733.95	-1.99327
dGFHAVQR	Q852M1	N-Term(iTRAQ8plex)	15.95	1.16814	1	1.06596	1	1.1475	1	0.862602	1	0.996933	1	0.996794	1	2	1233.66	-3.72696
dGFILDDGR	B9F2M0	N-Term(iTRAQ8plex)	5.18	0.898223	1	0.898453	1	0.864231	1	1.09108	1	1.09521	1	1.08222	1	2	1311.68	-2.83262
dGFPPLEPDMk	Q0DL03	N-Term(iTRAQ8plex); K11(iTRAQ8plex)	25.43	0.737416	1	0.624625	1	0.636038	1	1.16968	1	1.15709	1	1.02788	1	2	1853.99	-2.47818
dGFSAVALRPAVR	Q6ZLA9	N-Term(iTRAQ8plex)	2.04	0.840025	1	0.98038	1	0.974903	1	1.30911	1	1.26099	1	1.20569	1	3	1662.96	-2.03525
dGFVAAGSTTSEVR	Q7EY72	N-Term(iTRAQ8plex)	9.79	1.11394	1	1.29396	1	1.30898	1	1.04703	1	1.14954	1	1.06508	1	2	1700.87	-1.76559
dGFVSLDNFR	B8B2H8	N-Term(iTRAQ8plex)	30.01	0.915276	9	0.957117	9	0.963089	9	0.964063	9	0.95776	9	0.925933	9	2	1473.76	-3.15951
dGGAASEYLIEEEEGLNEHNVVEk	O80384	N-Term(iTRAQ8plex); K24(iTRAQ8plex)	29.77	1.05082	13	1.0888	13	1.03294	13	1.02895	13	1.10028	13	1.14216	13	4	3239.6	-3.81362
dGGAATSALDEVVDk	A2ZFX4	N-Term(iTRAQ8plex); K15(iTRAQ8plex)	37.68	0.990255	1	0.997433	1	0.986839	1	0.860967	1	0.897904	1	0.854543	1	3	2056.08	-8.37095
dGGAGVELTHMR	Q5QLM8	N-Term(iTRAQ8plex)	28.23	0.838701	2	0.826647	2	0.828157	2	0.907039	2	0.937636	2	0.98698	2	3	1546.79	-2.50227
dGGAGVELTHmR	Q5QLM8	N-Term(iTRAQ8plex); M11(Oxidation)	16.66	1.06162	1	1.26365	1	1.13755	1	1.16722	1	1.08046	1	1.18538	1	3	1562.79	0.035094
dGGESEVTLAR	Q8LJ11	N-Term(iTRAQ8plex)	41.59	1.1382	1	1.23369	1	1.10709	1	0.700367	1	0.799818	1	0.79172	1	2	1437.75	-2.48063
dGGSDYLGk	Q42971;B8AK24;Q5VNT9	N-Term(iTRAQ8plex); K9(iTRAQ8plex)	37.36													2	1519.81	-6.45628
dGHVGIDEEAR	Q2R3W2	N-Term(iTRAQ8plex)	14.48	0.953597	2	1.26051	2	1.16432	2	1.08162	2	1.04541	2	1.18354	2	3	1501.75	-2.57738
dGIGNNEDDFSGVERPk	Q84QV5	N-Term(iTRAQ8plex); K17(iTRAQ8plex)	31.35	1.02053	3	1.05483	3	0.869932	3	1.16927	3	1.09378	3	1.06084	3	3	2457.24	-0.846182
dGIIYPSETYQGFR	A3BAC7	N-Term(iTRAQ8plex)	9.86	0.916387	1	0.648714	1	0.99108	1	0.855371	1	0.869614	1	0.998955	1	2	1950	2.34963
dGITVFVPk	Q6ZFJ0	N-Term(iTRAQ8plex); K9(iTRAQ8plex)	6.72	0.852734	1	0.830482	1	0.805406	1	0.951711	1	0.936014	1	0.90999	1	2	1583.96	-3.32257
dGIYTALVk	A3AMT5	N-Term(iTRAQ8plex); K9(iTRAQ8plex)	12.38	0.931543	1	0.841337	1	0.859405	1	0.997976	1	0.977408	1	0.940482	1	3	1587.96	0.619298
dGkPFVDVLk	P17784;Q5N725	N-Term(iTRAQ8plex); K3(iTRAQ8plex); K10(iTRAQ8plex)	8.26													3	2030.24	-2.50764
dGLAPASSDk	Q9ST80	N-Term(iTRAQ8plex); K10(iTRAQ8plex)	20.29	0.859776	1	0.794512	1	0.811884	1	1.20511	1	1.21475	1	1.07885	1	3	1568.87	-4.34686
dGLGADEALDYR	A2Z2U1	N-Term(iTRAQ8plex)	58.27	1.11427	2	1.25703	2	1.35041	2	1.02006	2	0.958111	2	1.11378	2	3	1598.79	-4.61329
dGLGIcLPDIk	Q01J03	N-Term(iTRAQ8plex); C6(Carbamidomethyl); K11(iTRAQ8plex)	42.39	0.92899	10	0.835176	10	0.861331	10	0.98607	10	0.991609	10	0.958977	10	2	1809.03	-7.41635
dGLLEDFATQGGDR	O49068	N-Term(iTRAQ8plex)	2.82	0.999225	1	0.862345	1	0.944452	1	1.06109	1	0.982089	1	0.989665	1	2	1797.89	-3.58954
dGLLQGQATTTSH	Q6L4S3	N-Term(iTRAQ8plex)	81.39	1.00817	15	1.06385	15	0.971411	15	0.9946	15	1.03547	15	0.969265	15	2	1632.85	-0.720887
dGLSDSTVR	Q10D94	N-Term(iTRAQ8plex)	11.19	0.986962	1	0.981933	1	0.968778	1	1.00892	1	1.08796	1	1.00718	1	2	1253.66	-1.99156
dGLTSGSETNSSAVk	Q8H2U6	N-Term(iTRAQ8plex); K15(iTRAQ8plex)	2.51	0.954773	1	1.00522	1	1.0015	1	0.885403	1	0.939604	1	0.95822	1	3	2061.09	-0.960798
dGLVLmEDDFR	Q8W3J0	N-Term(iTRAQ8plex); M6(Oxidation)	14.16	0.962946	1	0.865833	1	0.904619	1	0.923418	1	1.00865	1	0.923397	1	2	1629.8	-4.05582
dGNAATIk	Q6Z3Y9	N-Term(iTRAQ8plex); K8(iTRAQ8plex)	26.47	1.37553	2	1.6006	2	1.48798	2	1.28621	2	1.30786	2	1.1104	2	2	1397.81	-4.73219
dGNIPVSR	F6M2M6	N-Term(iTRAQ8plex)	15.3	0.912502	1	1.04545	1	0.957963	1	1.07825	1	1.03995	1	1.13305	1	2	1161.65	-3.01265
dGNLAYEGQR	Q5VP89	N-Term(iTRAQ8plex)	10.25	1.05314	1	1.01526	1	1.11657	1	1.11438	1	1.22801	1	1.2812	1	2	1426.72	-3.51174
dGNSTNSESTTSEFSR	B8BBQ1	N-Term(iTRAQ8plex)	32.12	1.09068	1	1.73273	1	1.30708	1	1.10263	1	0.842328	1	1.29847	1	3	2022.91	-3.66708
dGPQEQYPAGAGAGETTSR	A3BQM3	N-Term(iTRAQ8plex)	42.17	1.03994	2	2.85283	2	1.38085	2	0.884474	2	0.804355	2	1.0204	2	3	2196.06	3.87781
dGPQEQyPAGAGAGETTSR	A3BQM3	N-Term(iTRAQ8plex); Y7(iTRAQ8plex)	29.71	1.38491	2	1.55227	2	1.19986	2	1.08414	2	0.937571	2	0.866877	2	4	2500.25	-1.81414
dGQGWGGEAk	B7EB21	N-Term(iTRAQ8plex); K10(iTRAQ8plex)	35.46	0.888615	1	1.10777	1	0.930762	1	1.10708	1	1.23026	1	1.03574	1	2	1612.84	-6.23844
dGQLQAk	Q6ZIV7	N-Term(iTRAQ8plex); K7(iTRAQ8plex)	22.47	0.931968	3	0.9489	3	0.873715	3	1.04185	3	1.13349	3	0.996602	3	3	1367.81	-2.9637
dGSALTVk	A3AV21	N-Term(iTRAQ8plex); K8(iTRAQ8plex)	25.52	0.88292	1	0.797598	1	0.748648	1	1.02434	1	1.04956	1	1.00525	1	2	1398.84	-4.38986
dGSGYITVDELQQAck	B9FC58;A2X8E5	N-Term(iTRAQ8plex); C15(Carbamidomethyl); K16(iTRAQ8plex)	46.77													3	2392.22	-1.90649
dGSLQLTTTQ	A2YMS7	N-Term(iTRAQ8plex)	19.28	1.04877	2	1.14008	2	1.12426	2	1.06222	2	1.41186	2	1.1304	2	2	1367.73	-3.30966
dGSVFFQk	B8B5M9	N-Term(iTRAQ8plex); K8(iTRAQ8plex)	27.05	0.8784	1	0.951887	1	0.832654	1	0.941808	1	0.976784	1	0.832111	1	2	1535.87	-1.01751
dGTEYVTR	Q7X8V5	N-Term(iTRAQ8plex)	10.99	0.981595	1	1.0115	1	1.00436	1	0.935716	1	0.962918	1	0.94632	1	2	1244.64	-2.00952
dGTGTLTVFTNDR	Q7XPR2	N-Term(iTRAQ8plex)	29	0.832605	2	0.87345	2	0.947229	2	1.17515	2	1.14913	2	1.23595	2	2	1700.87	-1.18555
dGTLSTYEck	B9GB84	N-Term(iTRAQ8plex); C9(Carbamidomethyl); K10(iTRAQ8plex)	18.72	0.994888	1	0.887791	1	0.873669	1	1.03044	1	1.04228	1	1.05141	1	3	1781.91	-4.02398
dGTNVEEAFQcIVk	B8AZZ6	N-Term(iTRAQ8plex); C11(Carbamidomethyl); K14(iTRAQ8plex)	87.13	0.9023	19	0.831427	19	0.868753	19	1.04242	19	1.08357	19	1.00616	19	2	2218.17	0.850028
dGTTLLWDLTEGk	Q6L4F8	N-Term(iTRAQ8plex); K13(iTRAQ8plex)	8.06	0.969858	5	0.869576	5	0.866238	5	1.03827	5	1.03776	5	1.02668	5	3	2057.14	2.13869
dGTTVALWk	Q10M12	N-Term(iTRAQ8plex); K9(iTRAQ8plex)	31.4	0.857703	10	0.809874	10	0.802343	10	1.05679	10	1.12944	10	1.05635	10	2	1598.93	-4.45082
dGTVAALPGAk	Q69X22	N-Term(iTRAQ8plex); K11(iTRAQ8plex)	31.97	0.959386	1	1.0191	1	0.963011	1	0.993684	1	0.98451	1	1.14178	1	3	1607.95	-3.21682
dGVAAAVR	B9F0T2	N-Term(iTRAQ8plex)	30.94	1.03794	2	0.895432	2	0.759167	2	0.46012	2	1.11816	2	0.459943	2	2	1062.62	-0.960507
dGVDVDSIDLDGR	B8AF40	N-Term(iTRAQ8plex)	28.01	1.07045	2	1.10734	2	1.292	2	0.965885	2	1.17445	2	1.12641	2	3	1679.84	0.00125617
dGVGIcLR	Q6ZFH9	N-Term(iTRAQ8plex); C6(Carbamidomethyl)	14.81	0.911007	1	0.982721	1	0.948642	1	0.946047	1	1.0095	1	0.96886	1	2	1193.66	-5.31846
dGVIGPYIWk	Q0DL03	N-Term(iTRAQ8plex); K10(iTRAQ8plex)	15.69	0.888649	1	0.79702	1	0.67652	1	1.01182	1	1.02417	1	0.951552	1	2	1756.02	-1.78067
dGVIMASDTGASYGSTLR	Q9LST4	N-Term(iTRAQ8plex)	8.75	1.29483	1	1.20061	1	2.10615	1	1.15667	1	1.57182	1	1.68106	1	2	2105.05	1.4746
dGVLEQIGEGk	Q84VC8	N-Term(iTRAQ8plex); K11(iTRAQ8plex)	15.07	0.985787	1	0.885032	1	0.956931	1	1.01857	1	1.00366	1	0.989609	1	3	1752.99	-4.01484
dGVVLAVEk	Q9LSU1	N-Term(iTRAQ8plex); K9(iTRAQ8plex)	49.14	0.998673	3	1.02993	3	0.952619	3	0.943557	3	0.991198	3	0.927759	3	2	1537.94	-0.340724
dGWPEYYDGk	Q0JD43;A2X5Y2	N-Term(iTRAQ8plex); K10(iTRAQ8plex)	4.89													2	1837.92	-1.34078
dGWTPQWVR	A2WL80	N-Term(iTRAQ8plex)	10.81	0.861555	2	0.834749	2	0.941139	2	0.982519	2	1.11444	2	1.06384	2	2	1448.76	-1.4287
dGYNQQNTNDQER	B9FQU1	N-Term(iTRAQ8plex)	21.76	0.825435	1	0.922055	1	0.973924	1	0.68502	1	0.676449	1	0.92555	1	3	1885.86	-1.00281
dGYVSHk	A2Y2C4	N-Term(iTRAQ8plex); K7(iTRAQ8plex)	8.99	1.04158	1	1.27155	1	1.09809	1	1.11698	1	1.11634	1	1.102	1	3	1413.79	-3.35353
dHADANIR	Q75M17	N-Term(iTRAQ8plex)	22.29	1.00986	3	1.51742	3	1.20784	3	1.05698	3	1.1157	3	1.17458	3	2	1215.64	-2.62568
dHDVTVAPR	Q10K23	N-Term(iTRAQ8plex)	34.19	1.33821	6	1.40581	6	1.44102	6	0.911548	6	0.73678	6	0.779112	6	2	1313.71	-2.18887
dHGAVGPVk	Q6K7A3	N-Term(iTRAQ8plex); K9(iTRAQ8plex)	28.38	1.05025	3	1.2853	3	1.22575	3	1.02233	3	0.989941	3	1.09269	3	2	1487.87	-6.22549
dHGGVIEk	B7E4J4	N-Term(iTRAQ8plex); K8(iTRAQ8plex)	37.34	0.865216	6	0.966287	6	0.840614	6	1.09386	6	1.13872	6	1.06899	6	2	1462.84	-3.06129
dHGVAPDRPLDPAVLSR	B9FC58	N-Term(iTRAQ8plex)	19.46	1.01109	60	1.1462	60	0.975143	60	1.02255	60	1.00138	60	1.01018	60	4	2119.15	-1.6519
dHPLVNPFGPASR	Q8GSE8	N-Term(iTRAQ8plex)	43.53	1.25915	4	1.72712	4	1.47491	4	1.12029	4	0.902123	4	1.12825	4	3	1710.92	-1.35827
dHPPPPAEAQk	Q7F0M8	N-Term(iTRAQ8plex); K11(iTRAQ8plex)	24.83	1.11895	2	1.63598	2	1.29486	2	1.2736	2	1.01534	2	1.10302	2	3	1794.99	-3.06447
dHSAGLNcGR	C7J1P7	N-Term(iTRAQ8plex); C8(Carbamidomethyl)	2.34	0.838851	1	0.878571	1	0.689485	1	0.974847	1	0.851833	1	0.919865	1	3	1390.68	-1.88005
dHSAIGTVR	B8B1F2	N-Term(iTRAQ8plex)	21.67	1.05258	1	1.62657	1	1.41391	1	0.957618	1	0.777486	1	1.13819	1	3	1259.7	-0.952289
dHTDPNIVVMLVGNk	P40393	N-Term(iTRAQ8plex); K15(iTRAQ8plex)	17.01	1.04334	13	1.13583	13	1.03941	13	1.04268	13	0.94081	13	1.02933	13	4	2260.25	-1.75745
dHVLLLAAR	Q7XPY2	N-Term(iTRAQ8plex)	11.9	0.967895	31	0.925046	31	0.911816	31	0.974316	31	0.999646	31	0.988341	31	3	1311.8	-1.99608
dIAAFPFR	Q9AQZ5	N-Term(iTRAQ8plex)	10.39	1.01933	1	1.01592	1	1.06639	1	1.05763	1	1.02065	1	1.0379	1	2	1240.7	-1.7105
dIAAQcLQk	Q2QLJ6	N-Term(iTRAQ8plex); C6(Carbamidomethyl); K9(iTRAQ8plex)	35.46	0.896486	1	0.857845	1	0.899662	1	0.974011	1	1.0504	1	1.00917	1	2	1654.93	-5.43048
dIAAQEk	Q84VG0	N-Term(iTRAQ8plex); K7(iTRAQ8plex)	12.55	1.70364	1	2.56146	1	1.48786	1	1.69736	1	0.702997	1	0.900708	1	3	1382.81	-2.75912
dIADDGGSSAAEFQR	A2YLE3	N-Term(iTRAQ8plex)	55.62	1.16349	2	1.19855	2	1.22086	2	0.839016	2	0.833263	2	0.853124	2	2	1842.88	1.1497
dIAELNLPk	Q69NC4	N-Term(iTRAQ8plex); K9(iTRAQ8plex)	9.66	1.0302	1	0.808209	1	0.90089	1	0.795699	1	1.03337	1	0.923178	1	2	1620.98	-0.850802
dIAIDck	B9FAH6	N-Term(iTRAQ8plex); C6(Carbamidomethyl); K7(iTRAQ8plex)	12.18	0.912905	1	0.861038	1	0.884492	1	0.969558	1	1.01231	1	0.972614	1	2	1442.8	-7.82904
dIcQDGGIFk	Q7F1F2	N-Term(iTRAQ8plex); C3(Carbamidomethyl); K10(iTRAQ8plex)	42.31	0.998994	2	1.05687	2	0.878377	2	0.943802	2	1.00982	2	0.939695	2	2	1760.94	-3.16078
dIDADGTR	Q654U5	N-Term(iTRAQ8plex)	17.73	0.960673	1	0.957201	1	0.933135	1	0.98323	1	1.07131	1	1.05835	1	2	1166.59	-2.20145
dIDEVGk	Q7XIE2	N-Term(iTRAQ8plex); K7(iTRAQ8plex)	27.96	1.42276	2	1.58379	2	1.17384	2	1.54044	2	0.799261	2	0.871909	2	2	1383.79	-1.93955
dIDLPTFVQk	Q10HX5	N-Term(iTRAQ8plex); K10(iTRAQ8plex)	9.17	1.00578	2	0.918122	2	0.858822	2	0.88963	2	0.915827	2	0.899986	2	3	1784.04	1.93588
dIEAHVASVR	B8AAS8	N-Term(iTRAQ8plex)	23.9	1.00602	7	0.993645	7	0.976144	7	1.08042	7	1.00415	7	0.983906	7	3	1400.78	-1.43032
dIEASAPEGGEFSAk	A2X7G8	N-Term(iTRAQ8plex); K15(iTRAQ8plex)	69.8	1.17847	61	1.35437	61	1.05698	61	1.1585	61	0.956222	61	0.942809	61	4	2116.1	0.253484
dIEDADk	A2YY23	N-Term(iTRAQ8plex); K7(iTRAQ8plex)	14.46	1.10273	1	0.929146	1	0.991185	1	0.809237	1	0.771609	1	0.753175	1	2	1413.76	-8.24327
dIEFVQNk	B8BBN7	N-Term(iTRAQ8plex); K8(iTRAQ8plex)	18.67	0.973892	1	0.956858	1	0.975154	1	1.0668	1	0.993598	1	0.945409	1	2	1600.91	-2.69902
dIETLGIk	Q8S5M6	N-Term(iTRAQ8plex); K8(iTRAQ8plex)	25.79	0.944644	2	0.87848	2	0.877754	2	1.01541	2	1.05859	2	0.939246	2	2	1496.91	-0.955188
dIEVDNNDLTGPIPEGVcDNR	Q5W675	N-Term(iTRAQ8plex); C18(Carbamidomethyl)	18.45	1.16109	1	1.20169	1	1.32874	1	0.927394	1	1.07353	1	1.02948	1	3	2646.27	1.39209
dIEVMEAk	B9F2Q3	N-Term(iTRAQ8plex); K8(iTRAQ8plex)	16.1	0.819391	1	0.81721	1	0.814661	1	0.923262	1	0.932483	1	0.836214	1	2	1542.85	-11.7234
dIFDIAGR	Q7XT06;B9FD44	N-Term(iTRAQ8plex)	15.04													2	1210.67	-2.70904
dIFTSINWIPk	Q8H6G8	N-Term(iTRAQ8plex); K11(iTRAQ8plex)	23.72	1.08921	15	0.916657	15	0.910599	15	0.862474	15	0.877722	15	0.853033	15	3	1942.12	-4.21828
dIFYITGSSk	Q0D9G9	N-Term(iTRAQ8plex); K10(iTRAQ8plex)	38.26	0.867118	2	0.780465	2	0.753476	2	0.952501	2	0.965329	2	0.926758	2	2	1738.98	-2.95009
dIGAGNFGVAR	Q7XQP4	N-Term(iTRAQ8plex)	35.56	1.08038	1	1.06115	1	1.07909	1	1.02247	1	0.997974	1	1.01482	1	3	1380.76	2.42833
dIGIAAGLVR	Q9ST80	N-Term(iTRAQ8plex)	31.63	0.924184	12	0.884031	12	0.928421	12	1.01956	12	0.994515	12	1.03398	12	2	1288.79	-1.30369
dIGSGNFGVAR	Q206Y6	N-Term(iTRAQ8plex)	30.77	1.09295	1	0.966049	1	1.01384	1	0.897797	1	0.961177	1	0.897894	1	2	1396.74	-5.13239
dIHAEAVk	Q75KZ3;Q8L3Y6	N-Term(iTRAQ8plex); K8(iTRAQ8plex)	36.79													2	1490.87	-5.82115
dIHQIISk	Q852B4	N-Term(iTRAQ8plex); K8(iTRAQ8plex)	26.05	0.905675	2	0.880104	2	0.813406	2	0.965365	2	1.01533	2	0.916132	2	3	1561.95	0.606838
dIILEDLk	B8B250	N-Term(iTRAQ8plex); K8(iTRAQ8plex)	32.92	1.00123	1	0.800588	1	0.800029	1	0.894836	1	1.07457	1	0.900321	1	3	1566.95	-2.32325
dIIMVDHMR	Q84VE1	N-Term(iTRAQ8plex)	31.05	1.1444	9	1.19942	9	1.13352	9	1.02856	9	0.806442	9	0.906686	9	3	1433.75	-2.03497
dIIMVDHmR	Q84VE1	N-Term(iTRAQ8plex); M8(Oxidation)	14.71	0.992205	2	1.03103	2	0.93984	2	0.949301	2	0.910135	2	0.902412	2	3	1449.75	-0.125883
dIISEVDTDNDGR	P53683	N-Term(iTRAQ8plex)	66.44	1.03669	6	1.08257	6	1.181	6	1.17732	6	1.11294	6	1.18059	6	2	1752.85	-2.64466
dIIVSAMDR	Q01JZ7	N-Term(iTRAQ8plex)	13.16	1.11166	1	1.11713	1	1.48115	1	0.959063	1	0.952928	1	1.19566	1	3	1323.72	-0.13938
dILMPLQDk	A2ZFX4	N-Term(iTRAQ8plex); K9(iTRAQ8plex)	14.48	1.05088	2	1.06973	2	1.01593	2	0.979095	2	0.947084	2	0.889525	2	3	1680.98	-0.696917
dILQSGVQSk	P0C5A3	N-Term(iTRAQ8plex); K10(iTRAQ8plex)	35.93	0.98852	2	0.945541	2	0.969736	2	1.00113	2	1.01833	2	0.995245	2	2	1682.99	-2.42902
dINALEQHIk	Q8H8T0	N-Term(iTRAQ8plex); K10(iTRAQ8plex)	54.49	0.935273	42	0.962036	42	0.911547	42	1.00785	42	1.01816	42	0.980253	42	3	1789.04	-3.3157
dINPQAPTHIVIIPk	Q10M57	N-Term(iTRAQ8plex); K15(iTRAQ8plex)	22.96	1.07842	17	1.06483	17	1.01954	17	0.931261	17	0.964038	17	0.897284	17	3	2264.36	0.658601
dIPEEEAVcR	Q653U9	N-Term(iTRAQ8plex); C9(Carbamidomethyl)	4.86	0.92227	1	0.882834	1	0.808013	1	0.960915	1	1.00993	1	0.98022	1	2	1521.75	-4.64111
dIPWESYMANk	Q84ZC0	N-Term(iTRAQ8plex); K11(iTRAQ8plex)	32.43	0.925362	23	0.923696	23	0.860525	23	0.960335	23	1.06626	23	0.94377	23	3	1962.02	-3.02857
dIPWESYmANk	Q84ZC0	N-Term(iTRAQ8plex); M8(Oxidation); K11(iTRAQ8plex)	25.46	0.926711	1	0.962	1	0.890851	1	1.04019	1	1.20541	1	1.12033	1	3	1978.02	-2.13044
dIQASVk	A2ZTZ7	N-Term(iTRAQ8plex); K7(iTRAQ8plex)	26.29	0.966571	1	0.916704	1	0.912762	1	0.911263	1	0.893121	1	0.799672	1	2	1368.83	-2.91749
dIQEVPSR	A2XTJ4	N-Term(iTRAQ8plex)	26.89	0.964982	1	1.09538	1	1.21872	1	0.878931	1	0.960418	1	1.0801	1	3	1247.69	-2.38047
dIQQFEATSQVPDGLSR	Q942N7	N-Term(iTRAQ8plex)	54.12	1.09991	2	0.941672	2	1.15583	2	1.05596	2	1.08764	2	1.09558	2	3	2195.12	-1.12786
dISDAHYk	B7E8Y8	N-Term(iTRAQ8plex); K8(iTRAQ8plex)	13.99	0.936691	1	1.02043	1	1.00823	1	0.971853	1	0.932439	1	0.92775	1	3	1556.85	-0.785953
dISELNLPk	Q33AD9	N-Term(iTRAQ8plex); K9(iTRAQ8plex)	24.65	0.991696	1	1.01314	1	0.922173	1	1.0659	1	1.0478	1	0.908623	1	2	1636.97	-1.5362
dITELIAcGR	Q5SNH7	N-Term(iTRAQ8plex); C8(Carbamidomethyl)	25.32	0.852863	4	0.891352	4	0.961385	4	1.08463	4	1.06655	4	1.09625	4	2	1451.78	-1.5967
dITEVIAAGR	A6MZN1	N-Term(iTRAQ8plex)	28.14	0.998734	19	0.945588	19	1.14911	19	1.04226	19	1.04785	19	1.06772	19	2	1348.77	-3.41694
dITEYGEFVR	A2ZJB7	N-Term(iTRAQ8plex)	17.1	1.0553	2	0.947327	2	1.06268	2	0.980382	2	0.991824	2	1.00293	2	3	1532.79	-1.12945
dITGEMFTk	Q6ZD98	N-Term(iTRAQ8plex); K9(iTRAQ8plex)	23.74	0.863488	1	0.932227	1	0.94331	1	1.02389	1	1.17663	1	1.08251	1	2	1649.9	-0.900971
dITGNPR	Q10NA9;Q53NM9	N-Term(iTRAQ8plex)	13.82													2	1076.6	-1.63016
dITPDDkQELDEALQR	Q84XH0	N-Term(iTRAQ8plex); K7(iTRAQ8plex)	14.74	0.986697	3	0.912442	3	0.933275	3	0.88652	3	1.00666	3	0.885444	3	3	2494.32	-0.233546
dITPMGGFPHYGVVk	P35684	N-Term(iTRAQ8plex); K15(iTRAQ8plex)	31.6	0.975889	20	0.987687	20	0.970178	20	1.03566	20	1.00532	20	1.00146	20	3	2226.21	-3.41959
dIVALSGGHTLGR	Q6ZJJ1;Q9FE01	N-Term(iTRAQ8plex)	48.83													3	1599.91	-1.73536
dIVASLEPLQADDEAR	B8BH02	N-Term(iTRAQ8plex)	34.22	0.886369	1	0.913384	1	1.31258	1	0.774863	1	1.02281	1	1.13242	1	3	2046.07	0.789138
dIVDSHYk	P14656	N-Term(iTRAQ8plex); K8(iTRAQ8plex)	31.17	1.0633	6	1.04126	6	1.04309	6	0.914896	6	0.875158	6	0.831654	6	3	1584.88	-3.11426
dIVGSAYYVAPEVLR	P53683	N-Term(iTRAQ8plex)	15.38	1.05432	1	0.910697	1	0.850822	1	0.792694	1	0.88157	1	0.97079	1	2	1956.07	-3.13711
dIVGSAyYVAPEVLR	P53683	N-Term(iTRAQ8plex); Y7(iTRAQ8plex)	3.78	1.07159	1	0.887163	1	0.921275	1	1.08174	1	1.03333	1	1.00361	1	3	2260.27	-5.54591
dIVLHALSAAFNNPER	Q40742	N-Term(iTRAQ8plex)	16.6	1.06955	1	1.07826	1	0.961109	1	1.11034	1	1.05453	1	0.914967	1	3	2071.12	0.27642
dIVQFVPMR	B8AXT7	N-Term(iTRAQ8plex)	20.66	0.973373	3	0.896665	3	0.941669	3	1.05588	3	1.05751	3	1.03976	3	2	1408.79	-0.118806
dIVQFVPmR	B8AXT7	N-Term(iTRAQ8plex); M8(Oxidation)	28.49	1.12033	1	1.04064	1	1.17476	1	1.08344	1	1.00439	1	1.29796	1	3	1424.79	2.90656
dIYAAAFGTR	B8AFN7	N-Term(iTRAQ8plex)	29.98	0.909545	2	0.868155	2	1.12807	2	1.15275	2	1.02086	2	1.15812	2	3	1388.75	-1.2735
dIYQIPGISSTVNMEHIR	Q6EQX0	N-Term(iTRAQ8plex)	30.83	1.00455	16	1.14128	16	1.27849	16	0.999859	16	0.984566	16	1.11107	16	3	2377.25	1.21603
dIYSDADEDMR	Q0JL44	N-Term(iTRAQ8plex)	39.56	1.1479	2	1.10548	2	1.10544	2	0.97499	2	1.04793	2	1.0529	2	2	1633.72	-4.34855
dIYSDADEDmR	Q0JL44	N-Term(iTRAQ8plex); M10(Oxidation)	19.01	0.912977	1	0.943778	1	1.1404	1	0.843913	1	0.862981	1	0.794995	1	2	1649.72	-3.44388
dIYTAVQWLPk		N-Term(iTRAQ8plex); K11(iTRAQ8plex)	23.52													2	1942.12	-2.35201
dkDFEILAFPcNQFLR	Q10L56	N-Term(iTRAQ8plex); K2(iTRAQ8plex); C11(Carbamidomethyl)	47.26	1.05725	101	1.11656	101	1.01936	101	1.01261	101	0.988387	101	0.995392	101	3	2621.4	-1.05019
dkEEQAEFk	A2XHR1	N-Term(iTRAQ8plex); K2(iTRAQ8plex); K9(iTRAQ8plex)	0.4	0.892363	7	1.13611	7	0.99726	7	1.24426	7	1.33999	7	1.20397	7	3	2036.14	-2.3666
dkVELATk	A2XRZ0	N-Term(iTRAQ8plex); K2(iTRAQ8plex); K8(iTRAQ8plex)	7.92	1.10448	1	1.21762	1	1.10205	1	0.930278	1	0.872038	1	0.829975	1	4	1816.13	-2.85901
dLAALSGAHTVGR	A3A4X5	N-Term(iTRAQ8plex)	39.1	1.11935	2	1.32692	2	1.2487	2	1.05505	2	0.851561	2	1.01589	2	3	1571.88	-2.66641
dLAEESGVR	Q6L4R8	N-Term(iTRAQ8plex)	15.63	0.959075	1	1.00001	1	1.01276	1	0.938803	1	1.01604	1	0.987852	1	2	1279.67	-5.41254
dLANLVIVcGDHGNQSk	A2YA91	N-Term(iTRAQ8plex); C9(Carbamidomethyl); K17(iTRAQ8plex)	35.38	1.05646	11	1.02997	11	1.0456	11	0.935055	11	0.989948	11	0.958977	11	4	2448.3	-3.76173
dLAPSDPAk	A2WJQ6	N-Term(iTRAQ8plex); K9(iTRAQ8plex)	16.85	0.980843	1	0.890262	1	0.900762	1	0.932203	1	0.988224	1	0.937948	1	3	1521.87	-3.31964
dLAQEHYk	Q762A0	N-Term(iTRAQ8plex); K8(iTRAQ8plex)	4.93	1.10075	1	1.19172	1	1.15135	1	0.978422	1	0.906953	1	1.09637	1	3	1611.89	-4.93967
dLATDIAk	A3C9V8	N-Term(iTRAQ8plex); K8(iTRAQ8plex)	3.84	0.804014	1	0.763061	1	0.759028	1	1.07711	1	1.1587	1	1.05922	1	2	1454.85	-14.6079
dLATGTESTPFVR	A2XA86	N-Term(iTRAQ8plex)	33.61	1.08877	1	1.13418	1	1.58374	1	1.08121	1	1.11838	1	1.16407	1	3	1697.9	-1.5776
dLATMASDYGNAk	Q69LE4	N-Term(iTRAQ8plex); K13(iTRAQ8plex)	61.85	0.917741	9	0.850312	9	0.847426	9	1.02985	9	1.05244	9	1.02781	9	2	1965.02	-1.48672
dLATSIEGk	Q653F6	N-Term(iTRAQ8plex); K9(iTRAQ8plex)	32.66	0.906815	2	0.840529	2	0.820806	2	0.93865	2	0.986743	2	0.916005	2	2	1541.89	-4.47215
dLcSASTTVQSGLR	Q6YWH9	N-Term(iTRAQ8plex); C3(Carbamidomethyl)	13.59	1.04408	1	1.05409	1	0.907266	1	0.966751	1	0.954694	1	1.00664	1	2	1798.93	2.07258
dLDEVFVk	Q7F1F2	N-Term(iTRAQ8plex); K8(iTRAQ8plex)	35.03	0.964739	4	0.919134	4	0.947656	4	1.0061	4	1.04	4	0.955895	4	2	1572.91	-2.49105
dLDLPAHk	B8AAS8	N-Term(iTRAQ8plex); K8(iTRAQ8plex)	27.78	0.897511	3	0.834519	3	0.851755	3	1.06296	3	1.03932	3	1.054	3	2	1516.89	-3.72593
dLDQVAGR	Q5KQL4	N-Term(iTRAQ8plex)	6.95	1.78151	1	2.44402	1	1.51231	1	1.77531	1	0.878851	1	0.874603	1	2	1177.65	-1.35309
dLEAGYSFDGQR	A2YJY0	N-Term(iTRAQ8plex)	17.89	0.885302	2	0.849919	2	0.874097	2	1.01383	2	1.03803	2	1.03514	2	2	1661.8	-3.16027
dLEAIFSNR	B9FLX5	N-Term(iTRAQ8plex)	20.34	0.998958	2	0.908763	2	0.908502	2	0.96345	2	1.01156	2	0.903852	2	3	1368.74	-5.25056
dLEASNVcSTYR	A2ZHH3	N-Term(iTRAQ8plex); C8(Carbamidomethyl)	48.91	0.936425	9	0.995119	9	1.11258	9	1.06387	9	1.10056	9	1.12792	9	3	1718.83	-2.16543
dLEENk	Q0ITI9	N-Term(iTRAQ8plex); K6(iTRAQ8plex)	6.08	0.931883	1	0.990424	1	0.997882	1	1.05335	1	1.21543	1	1.08573	1	2	1355.76	-2.65571
dLEIAGR	Q2QMY9	N-Term(iTRAQ8plex)	28.76	1.05771	1	1.12561	1	1.02998	1	1.11581	1	1.15434	1	1.17588	1	3	1077.62	-3.64598
dLEPGNPEEEAR	A2XSK0	N-Term(iTRAQ8plex)	23.12	1.05155	1	1.19667	1	2.08553	1	1.05385	1	1.01392	1	1.38617	1	3	1659.81	-1.22735
dLEPSNILR	Q5JNI4	N-Term(iTRAQ8plex)	10.33	1.09238	1	1.17	1	1.39033	1	1.08812	1	0.885707	1	1.1486	1	3	1360.77	-0.541145
dLESQANALSk	Q0E2E9	N-Term(iTRAQ8plex); K11(iTRAQ8plex)	28.63	0.905954	1	0.786743	1	0.852412	1	0.959494	1	1.08289	1	0.971889	1	3	1783.99	-3.53544
dLETPSYELmDIPR	B9FDE0	N-Term(iTRAQ8plex); M10(Oxidation)	32.68	1.00314	2	0.947101	2	1.19385	2	1.00092	2	1.11131	2	1.12914	2	3	1998.99	-4.98158
dLETPSYELMDIPR	B9FDE0	N-Term(iTRAQ8plex)	32.13	0.893153	6	0.863608	6	0.968707	6	0.957827	6	1.00642	6	1.04784	6	2	1983	-1.42342
dLEYATNR	Q94E23	N-Term(iTRAQ8plex)	0.8	1.01662	1	1.14044	1	1.17384	1	1.03855	1	1.02828	1	1.16367	1	2	1285.67	-2.75222
dLFADAENDQk	B8B005	N-Term(iTRAQ8plex); K11(iTRAQ8plex)	41.6	0.93444	2	0.833426	2	0.841904	2	1.02573	2	1.05345	2	0.954739	2	2	1873.96	-6.81516
dLFLAAAR	Q01N35	N-Term(iTRAQ8plex)	25.11	0.991252	2	0.877513	2	0.838228	2	0.852895	2	0.847566	2	0.872279	2	2	1180.7	-1.1771
dLFMDPEEAR	A6N1I2	N-Term(iTRAQ8plex)	19.87	0.977733	2	0.960158	2	0.992441	2	0.966042	2	0.938189	2	0.950397	2	2	1526.74	-3.30296
dLFNSQQVVGAk	Q0DJ99;B9FNT1	N-Term(iTRAQ8plex); K12(iTRAQ8plex)	9.33													3	1914.09	1.29011
dLGFQSADEGGSGTFR	B8A738	N-Term(iTRAQ8plex)	44.84	0.837042	1	0.828983	1	0.79066	1	0.994284	1	0.95996	1	0.988538	1	2	1947.93	-2.72915
dLGVMFIETSAk	Q8H4Q9	N-Term(iTRAQ8plex); K12(iTRAQ8plex)	4.55	0.954824	2	0.817331	2	0.804333	2	1.02566	2	1.02069	2	0.897982	2	3	1919.06	-8.64248
dLGVTDDLLk	A2WZR6	N-Term(iTRAQ8plex); K10(iTRAQ8plex)	32.47	1.01469	1	0.771118	1	0.791403	1	0.931647	1	1.00486	1	0.921237	1	2	1697	0.519398
dLHDQESTk	Q7XEH4	N-Term(iTRAQ8plex); K9(iTRAQ8plex)	19.09	1.21692	2	1.45743	2	1.412	2	1.0404	2	0.913479	2	1.10947	2	3	1680.9	-3.53528
dLIGPAMYFGLMGDGQPIGR	Q8H8T0	N-Term(iTRAQ8plex)	59.74	1.25452	10	1.07643	10	1.46758	10	1.06612	10	1.07007	10	1.35039	10	3	2412.23	-0.766673
dLIHSALR	Q6Z718	N-Term(iTRAQ8plex)	3.38	0.823209	16	0.914168	16	0.851885	16	0.849307	16	0.849018	16	0.822773	16	3	1228.73	0.347062
dLIISPHPTR	A2YCU6	N-Term(iTRAQ8plex)	20.47	1.40727	1	1.77889	1	1.464	1	1.34968	1	0.818013	1	1.00956	1	3	1452.85	-1.05848
dLILDYcR	Q5SMZ2	N-Term(iTRAQ8plex); C7(Carbamidomethyl)	8.42	0.997963	1	1.00663	1	1.02916	1	1.01705	1	1.0295	1	0.980687	1	2	1371.72	-1.59634
dLILPVSEcR	B8BKH9	N-Term(iTRAQ8plex); C9(Carbamidomethyl)	18.48	1.09562	2	1.03859	2	1.13303	2	1.00811	2	1.05491	2	1.05155	2	2	1505.83	-0.535345
dLITPTYk	Q5VM91;B8A7L3;B8A6V4	N-Term(iTRAQ8plex); K8(iTRAQ8plex)	20.91													2	1558.92	-4.5224
dLIYQEGLAFNPDYQ	B3GCK7	N-Term(iTRAQ8plex)	49.44	1.25875	1	1.13289	1	1.12294	1	0.791166	1	1.04676	1	1.24601	1	2	2090.05	3.71708
dLkPENFLFANk	A2YMS7;B8ABN5	N-Term(iTRAQ8plex); K3(iTRAQ8plex); K12(iTRAQ8plex)	6.78													4	2348.37	-1.96466
dLkPENFLFTTR	B8B2H8	N-Term(iTRAQ8plex); K3(iTRAQ8plex)	10.32	0.972074	12	0.91865	12	0.839888	12	0.947053	12	1.0123	12	1.02309	12	3	2089.19	0.135734
dLkPENFLLANk	B9FC58;A2X8E5	N-Term(iTRAQ8plex); K3(iTRAQ8plex); K12(iTRAQ8plex)	2.81													4	2314.39	-1.68785
dLkPENFLLATk	P53683	N-Term(iTRAQ8plex); K3(iTRAQ8plex); K12(iTRAQ8plex)	22.52	0.949747	5	0.873639	5	0.848512	5	1.07337	5	1.0278	5	1.05691	5	3	2301.39	-2.13773
dLLDEALLRPGR	B8B005	N-Term(iTRAQ8plex)	0.85	0.995448	11	0.983193	11	0.988728	11	0.980314	11	1.00153	11	1.01946	11	3	1671.97	0.180317
dLLDGTQLQFk	Q8RU06	N-Term(iTRAQ8plex); K11(iTRAQ8plex)	34.98	0.979049	1	0.857009	1	0.833276	1	0.985544	1	1.10944	1	1.0416	1	2	1886.07	-5.48711
dLLEAHTPPGGR	P0C356	N-Term(iTRAQ8plex)	15.83	1.25616	1	1.67076	1	1.35695	1	1.1528	1	0.864777	1	1.10698	1	3	1566.86	3.59643
dLLLQLR	B8ADH7	N-Term(iTRAQ8plex)	6.11	1.00655	4	0.863285	4	0.917391	4	0.874124	4	0.899051	4	0.852559	4	2	1174.74	-1.55013
dLLLRPTPAVR	Q0DUA4	N-Term(iTRAQ8plex)	12.88	1.35231	1	1.58105	1	1.4065	1	0.791552	1	0.609565	1	0.618608	1	3	1554.96	-0.398484
dLLNLcEITk	A3AHY0	N-Term(iTRAQ8plex); C6(Carbamidomethyl); K10(iTRAQ8plex)	27.72	1.1083	1	0.9146	1	0.974615	1	0.89414	1	1.0739	1	1.0361	1	2	1827.04	-3.36287
dLLQADADDVR	Q6ASU8	N-Term(iTRAQ8plex)	19.36	1.08245	2	1.11504	2	1.14989	2	0.91142	2	0.984109	2	0.990156	2	2	1534.8	-2.50605
dLLSDSISPVPk	B8B402	N-Term(iTRAQ8plex); K12(iTRAQ8plex)	35.14	0.997956	1	1.00742	1	1.20852	1	0.916724	1	0.960955	1	1.12359	1	3	1879.11	3.22267
dLLVPIVk	B9FEB7	N-Term(iTRAQ8plex); K8(iTRAQ8plex)	10.22	0.913465	1	0.881998	1	0.894352	1	0.939226	1	0.921057	1	0.961528	1	3	1504.99	-1.18847
dLMAcAQTGSGk	Q6Z4K6;Q2R1M8;Q75HJ0	N-Term(iTRAQ8plex); C5(Carbamidomethyl); K12(iTRAQ8plex)	64.31													2	1846.96	-2.08576
dLMDDAER	P42863	N-Term(iTRAQ8plex)	9.99	1.10612	1	1.17637	1	1.13031	1	0.972805	1	1.02834	1	1.00294	1	2	1268.61	-3.10968
dLNFQAQQGMR	A2WL88	N-Term(iTRAQ8plex)	18.27	1.01484	1	0.942653	1	1.00186	1	1.01033	1	1.08346	1	1.0888	1	3	1611.82	1.05099
dLNPGEAEVAk	B8B7B1	N-Term(iTRAQ8plex); K11(iTRAQ8plex)	37.23	0.835371	1	0.654592	1	0.753707	1	1.10967	1	1.1268	1	1.01589	1	2	1750.97	-6.22842
dLPASFGDLLNLR	Q7XK44	N-Term(iTRAQ8plex)	22.55	1.11862	5	0.814055	5	0.880707	5	1.07648	5	1.04769	5	1.16909	5	3	1734.97	1.1085
dLPPSAIGEASGFDAk	Q6H547	N-Term(iTRAQ8plex); K16(iTRAQ8plex)	60.23	1.03508	4	0.862421	4	0.91097	4	0.986101	4	1.01071	4	0.978041	4	3	2183.17	-2.72889
dLQcETDk	A2WXW7	N-Term(iTRAQ8plex); C4(Carbamidomethyl); K8(iTRAQ8plex)	6.07	1.09052	1	1.03197	1	1.01011	1	1.11492	1	1.02896	1	1.08116	1	3	1616.83	-3.94995
dLQEYAANAADLR	Q69MU0	N-Term(iTRAQ8plex)	32.48	1.08785	1	1.05309	1	1.03994	1	0.837625	1	0.942689	1	0.878073	1	2	1753.9	0.416443
dLQMAPMDMEPk	Q8H811	N-Term(iTRAQ8plex); K12(iTRAQ8plex)	39.43	0.823086	1	0.708649	1	0.736481	1	1.07273	1	1.13471	1	1.07652	1	3	2014.02	-2.9156
dLQNSNEESk	Q5VRF6	N-Term(iTRAQ8plex); K10(iTRAQ8plex)	56.39	0.803172	2	0.7832	2	0.845903	2	0.98467	2	0.928158	2	0.969896	2	3	1771.93	-0.823587
dLQPQELEk	B8A9J6	N-Term(iTRAQ8plex); K9(iTRAQ8plex)	9.69	1.00085	2	1.02408	2	0.984712	2	1.03468	2	1.03343	2	0.987872	2	3	1707.97	-2.26498
dLQQEISDGEVEIPSA	Q0JAI2	N-Term(iTRAQ8plex)	117.54	0.842852	11	0.875861	11	1.03371	11	0.939218	11	1.04924	11	1.09529	11	2	2034.02	0.361416
dLQTDLEQk		N-Term(iTRAQ8plex); K9(iTRAQ8plex)	13.47													3	1697.95	-1.45862
dLScLPVSLDk	Q01LS3	N-Term(iTRAQ8plex); C4(Carbamidomethyl); K11(iTRAQ8plex)	4.64	1.23118	1	1.42029	1	1.03782	1	1.02191	1	0.905567	1	1.02285	1	4	1855.04	-0.588126
dLSDTIIPPSPVmFPEDR	B8ADH7	N-Term(iTRAQ8plex); M13(Oxidation)	8.51	1.0864	1	1.16782	1	1.27094	1	0.931855	1	0.934107	1	0.98307	1	3	2349.2	0.903035
dLSEAcVVDPPPVPk	A2Y9F2	N-Term(iTRAQ8plex); C6(Carbamidomethyl); K15(iTRAQ8plex)	17.23	0.903055	1	0.99882	1	1.02789	1	1.0081	1	1.09726	1	1.07155	1	3	2231.22	-2.18675
dLSGSFMTEQQR	Q6Z8S1	N-Term(iTRAQ8plex)	21.8	0.945258	2	1.05358	2	0.979251	2	0.99192	2	0.965645	2	1.02923	2	2	1702.83	-1.4487
dLSLLQAQMR	B8ABW1	N-Term(iTRAQ8plex)	26.27	1.09296	2	1.2381	2	1.23517	2	0.968566	2	0.931064	2	0.982345	2	2	1478.83	0.300761
dLSQADFGR	Q84VE1	N-Term(iTRAQ8plex)	17.86	1.59125	3	2.02321	3	1.33167	3	1.39282	3	0.698187	3	0.849969	3	2	1312.68	-3.29601
dLSSNQLHR	A2ZLT1	N-Term(iTRAQ8plex)	24.64	1.28629	2	1.41514	2	1.65235	2	1.06766	2	0.9155	2	1.5127	2	3	1373.74	-1.6597
dLSVATTTESYNSER	B9FB24	N-Term(iTRAQ8plex)	46.91	0.997799	1	1.21986	1	1.13151	1	1.08968	1	0.860117	1	1.00393	1	2	1976.97	-2.27356
dLTDcLMk	A2XNS1	N-Term(iTRAQ8plex); C5(Carbamidomethyl); K8(iTRAQ8plex)	15.3	0.867046	2	0.886851	2	0.883188	2	1.06377	2	1.12292	2	1.00746	2	2	1603.87	1.3077
dLTDNLMk	P0C542	N-Term(iTRAQ8plex); K8(iTRAQ8plex)	45.76	1.08107	1	1.0106	1	0.970434	1	0.736171	1	0.784949	1	0.674559	1	2	1557.87	-3.63446
dLTDSLMk	P0C539;Q65XH8;Q67G20	N-Term(iTRAQ8plex); K8(iTRAQ8plex)	12.15													2	1530.86	-3.51576
dLTDSLmk	P0C539;Q65XH8;Q67G20	N-Term(iTRAQ8plex); M7(Oxidation); K8(iTRAQ8plex)	22.05													2	1546.85	-6.58424
dLTDYLMk	A2XLF2	N-Term(iTRAQ8plex); K8(iTRAQ8plex)	45.01	0.928169	6	0.906994	6	0.898597	6	0.947071	6	1.01311	6	0.95791	6	2	1606.89	-1.62706
dLTDYLmk	A2XLF2	N-Term(iTRAQ8plex); M7(Oxidation); K8(iTRAQ8plex)	14.18	0.882498	2	0.676661	2	0.716265	2	0.870762	2	0.839597	2	0.836686	2	2	1622.89	-1.93775
dLTFPSSIPVSLAAk	Q9ST27	N-Term(iTRAQ8plex); K15(iTRAQ8plex)	36.53	1.03183	18	0.846996	18	0.925335	18	0.901914	18	0.936667	18	0.909404	18	3	2154.26	-1.52327
dLTPVPDcTScTTSLSk	Q0JML7	N-Term(iTRAQ8plex); C8(Carbamidomethyl); C11(Carbamidomethyl); K17(iTRAQ8plex)	46.2	0.882205	1	0.87255	1	1.03959	1	1.01367	1	1.13764	1	1.1541	1	3	2490.26	-2.04916
dLVDVVIIGR		N-Term(iTRAQ8plex)	12.95													3	1402.86	0.166583
dLVEEISESLAk	Q5W6H0	N-Term(iTRAQ8plex); K12(iTRAQ8plex)	20.65	1.04532	5	0.926005	5	0.904319	5	0.855827	5	0.912043	5	0.832175	5	3	1941.1	-1.20543
dLVGSAYYVAPEVLk	A2ZVI7;Q6I587;Q0D715	N-Term(iTRAQ8plex); K15(iTRAQ8plex)	42.02													3	2232.27	-1.19255
dLVGVAYTEEETk	B7ELQ3	N-Term(iTRAQ8plex); K13(iTRAQ8plex)	10.49	0.884442	1	0.84537	1	0.843194	1	1.00817	1	1.05084	1	0.999897	1	3	2062.11	-4.48542
dLVLQLLER	Q9LGA3	N-Term(iTRAQ8plex)	14.36	0.976977	10	0.89617	10	0.867484	10	0.926608	10	0.979004	10	1.03531	10	2	1402.85	-2.20963
dLVPGDIVELR	Q0DSY0	N-Term(iTRAQ8plex)	35.6	0.917039	1	0.879358	1	1.0292	1	1.04105	1	1.11637	1	1.25778	1	2	1529.88	-3.13178
dLVQGEPEkR	B9FAW0	N-Term(iTRAQ8plex); K9(iTRAQ8plex)	6.75	1.06881	1	1.09367	1	0.991241	1	1.03184	1	0.985118	1	0.992154	1	3	1779.02	-3.07787
dLVTATMk	Q0DL03	N-Term(iTRAQ8plex); K8(iTRAQ8plex)	29.98	0.863671	2	0.798218	2	0.784757	2	1.15672	2	1.22026	2	1.13923	2	2	1486.87	-2.74235
dLVTVPVR	Q69P55	N-Term(iTRAQ8plex)	5.79	1.12625	1	1.0702	1	1.10645	1	0.863745	1	0.856988	1	0.849297	1	2	1202.74	-4.8009
dLVVVPk	B9FA13	N-Term(iTRAQ8plex); K7(iTRAQ8plex)	6.93	0.936766	1	0.866199	1	0.857631	1	0.938243	1	1.01312	1	0.966174	1	2	1377.89	0.0322404
dLYAEEAAAQR	A3AHY0	N-Term(iTRAQ8plex)	27.89	1.1459	3	1.17365	3	1.32934	3	0.934029	3	0.975574	3	1.09458	3	2	1540.79	-0.0663405
dLYEQIIAER	Q6Z8F4	N-Term(iTRAQ8plex)	29.35	1.01583	6	1.02512	6	1.09751	6	1.03526	6	1.09709	6	1.10244	6	2	1553.85	1.18004
dLYQEYR	Q68UQ3	N-Term(iTRAQ8plex)	13.42	1.01114	1	1.00564	1	1.04401	1	1.01023	1	0.981133	1	1.04105	1	2	1290.66	-3.80471
dMGYNVSMMADSTSR	Q651T8;Q6EUQ9	N-Term(iTRAQ8plex)	28.56													3	1968.88	3.77784
dMGYNVSmMADSTSR	Q651T8;Q6EUQ9	N-Term(iTRAQ8plex); M8(Oxidation)	43.41													2	1984.88	3.61003
dMIQFAPMk	Q6H563	N-Term(iTRAQ8plex); K9(iTRAQ8plex)	34.49	0.907824	1	0.878648	1	0.869415	1	0.941857	1	0.984671	1	0.918944	1	2	1688.93	-1.9637
dMISQNER	A2YQC8	N-Term(iTRAQ8plex)	19.87	0.951863	3	0.8773	3	0.826114	3	0.917067	3	0.981792	3	0.940614	3	2	1296.65	-3.35534
dMPFVLVLNk	A2Y8G4	N-Term(iTRAQ8plex); K10(iTRAQ8plex)	10.06	1.01673	1	0.858605	1	0.829847	1	1.00245	1	1.00593	1	0.961081	1	3	1784.06	-1.73837
dMPVGTDAASYR	Q5ZDH9	N-Term(iTRAQ8plex)	26.34	1.05452	1	1.10799	1	1.09785	1	0.824403	1	0.862529	1	0.848201	1	2	1586.77	-4.10202
dmPVGTDAASYR	Q5ZDH9	N-Term(iTRAQ8plex); M2(Oxidation)	15.43	1.09508	1	1.79462	1	1.42606	1	1.09343	1	1.02994	1	1.33907	1	3	1602.77	0.702566
dMSPEFLR	Q6Z1R9	N-Term(iTRAQ8plex)	19.7	0.827101	1	0.786122	1	0.77949	1	1.07567	1	1.11235	1	1.03053	1	2	1298.67	-2.4307
dMTmSPPGPHGVk	Q6YZX6	N-Term(iTRAQ8plex); M4(Oxidation); K13(iTRAQ8plex)	10.46	1.23214	1	1.60054	1	1.19533	1	1.28344	1	0.795297	1	0.882127	1	3	1978.03	-2.30624
dmTSYNDLNQLAEEAR	Q8L6I2	N-Term(iTRAQ8plex); M2(Oxidation)	83.42	0.894913	1	0.847761	1	0.970334	1	0.898689	1	0.711773	1	0.78403	1	2	2190.03	-1.14869
dMTSYNDLNQLAEEAR	Q8L6I2	N-Term(iTRAQ8plex)	45.32	0.776287	1	0.723974	1	0.672966	1	0.591933	1	0.61036	1	0.703866	1	2	2174.02	-4.39451
dMWVANVGDSR	Q7FAK8	N-Term(iTRAQ8plex)	22.05	0.849381	1	0.778995	1	0.837944	1	1.05005	1	1.00501	1	1.00655	1	2	1553.76	-6.56794
dNADAcEAYDGDR	Q339K4	N-Term(iTRAQ8plex); C6(Carbamidomethyl)	64.98	0.865641	2	1.06317	2	1.19289	2	0.928402	2	0.954673	2	1.05592	2	3	1775.74	-2.73585
dNADAYNSNLIk	Q6Z4B2	N-Term(iTRAQ8plex); K12(iTRAQ8plex)	43.75	0.84904	1	0.994646	1	0.979975	1	1.10975	1	1.07733	1	1.01107	1	2	1946.03	-5.3732
dNADSSEQLSEIR	A2ZLQ0	N-Term(iTRAQ8plex)	23.59	1.14765	1	1.00542	1	1.18372	1	0.791096	1	0.838963	1	0.90492	1	2	1767.87	0.263322
dNATDQEIR	A2ZS26	N-Term(iTRAQ8plex)	23.42	0.960198	1	0.803809	1	0.868558	1	1.00765	1	0.997187	1	1.01972	1	2	1365.69	-3.5692
dNEAEVR	Q6K4K9	N-Term(iTRAQ8plex)	25.57	1.00032	1	0.973486	1	0.922198	1	0.980917	1	0.983027	1	0.88474	1	2	1136.58	-2.30367
dNFITALTVGTQYk	B9GCD1	N-Term(iTRAQ8plex); K14(iTRAQ8plex)	19.16	1.05485	3	1.08153	3	1.04902	3	1.08147	3	1.18466	3	0.927859	3	3	2179.21	-3.90427
dNFQGPGLEMR	Q10NQ2	N-Term(iTRAQ8plex)	18.9	0.854414	1	1.03382	1	0.956741	1	0.884783	1	0.974872	1	1.00668	1	2	1567.78	-4.26716
dNFVDEQLHPPQSAVLR	B9FXY9	N-Term(iTRAQ8plex)	24.47	1.11101	4	1.37458	4	1.2055	4	1.12823	4	1.15879	4	1.10333	4	3	2269.18	-2.07592
dNFVEAAELER	Q6Z4C0;Q6Z4B7;Q6Z481	N-Term(iTRAQ8plex)	45.56													2	1596.82	-0.819007
dNGVDDGGVVFDAGAR	A2WXV8	N-Term(iTRAQ8plex)	36.04	1.12528	3	1.02718	3	1.16591	3	0.841006	3	1.03678	3	1.05973	3	3	1867.9	-3.04081
dNILYGk	B9EYZ4	N-Term(iTRAQ8plex); K7(iTRAQ8plex)	16.38	0.984212	1	0.889992	1	0.900589	1	0.951558	1	0.970309	1	0.935113	1	2	1430.84	-3.73998
dNLTLWTSDANDDGGDEIk	Q2R2W2	N-Term(iTRAQ8plex); K19(iTRAQ8plex)	81.59	1.24002	3	0.919693	3	0.999631	3	1.00801	3	1.13918	3	1.06521	3	2	2687.33	1.27556
dNLTLWTSDISEDAAEEIk	Q6EUP4	N-Term(iTRAQ8plex); K19(iTRAQ8plex)	56.85	1.12919	26	1.07955	26	1.16346	26	1.0048	26	1.06702	26	1.01234	26	3	2758.41	-3.45931
dNLTLWTSDISEDTAEEIR	Q7XTE8	N-Term(iTRAQ8plex)	41.75	0.965329	2	1.00602	2	1.28845	2	0.960099	2	0.831702	2	0.931907	2	3	2512.23	-2.97612
dNLTLWTSDLTEDGGDEVk	Q6ZKC0	N-Term(iTRAQ8plex); K19(iTRAQ8plex)	76.33	0.978143	82	0.856425	82	0.914254	82	0.898682	82	1.03122	82	0.967779	82	3	2716.38	-0.317065
dNLTLWTSDNAEDGGDEIk	Q06967	N-Term(iTRAQ8plex); K19(iTRAQ8plex)	73.69	0.992403	66	0.884595	66	0.919857	66	0.920292	66	1.02459	66	0.947647	66	3	2701.34	-1.07251
dNMINFDELk	A2YMS7	N-Term(iTRAQ8plex); K10(iTRAQ8plex)	44.76	0.966095	17	0.925096	17	0.865198	17	0.999825	17	1.09624	17	0.947133	17	3	1846.97	-4.82851
dNMQINTLAR	B9FNR7	N-Term(iTRAQ8plex)	24.05	1.01463	2	1.09879	2	1.08809	2	0.985681	2	1.01069	2	1.00515	2	2	1479.79	-2.25512
dNNLLGk	Q943K7;Q10NA9;Q84TA1;Q6L509;Q53NM9	N-Term(iTRAQ8plex); K7(iTRAQ8plex)	21.7													2	1381.82	-4.84132
dNNTVVVNk	Q5VS79	N-Term(iTRAQ8plex); K9(iTRAQ8plex)	42.79	0.945824	4	0.816502	4	0.750029	4	1.07563	4	0.996966	4	1.0275	4	2	1610.93	-3.58309
dNPETDEck	Q9SNK3	N-Term(iTRAQ8plex); C8(Carbamidomethyl); K9(iTRAQ8plex)	17.66	1.01849	1	1.00928	1	0.972791	1	1.14272	1	1.09107	1	1.22069	1	3	1715.83	-1.82713
dNQLTGPVPDSLLk	P93425	N-Term(iTRAQ8plex); K14(iTRAQ8plex)	42.45	0.785854	1	0.772697	1	0.710418	1	1.14658	1	1.16584	1	1.08281	1	3	2105.2	-2.56054
dNQTVQSVLGTPTR	Q7Y0E8	N-Term(iTRAQ8plex)	43.52	0.912026	1	1.12239	1	1.00019	1	0.915387	1	0.872971	1	0.953041	1	2	1819.98	-1.12172
dNSAELLDMLTTcHDLSADR	Q4LB25	N-Term(iTRAQ8plex); C13(Carbamidomethyl)	57.16	1.19264	15	1.1488	15	1.09761	15	0.978267	15	0.913765	15	0.986627	15	3	2581.21	-3.70071
dNSGFITR	P53683	N-Term(iTRAQ8plex)	13.46	0.938241	2	0.877724	2	0.909743	2	1.07611	2	1.07752	2	1.10432	2	2	1213.64	-3.21577
dNSLLSNTVR	Q6AVA4	N-Term(iTRAQ8plex)	22.16	1.0355	1	1.06649	1	1.04421	1	0.890261	1	0.965511	1	0.931697	1	2	1422.78	-4.79291
dNWIDTDLPETk	Q69JZ2	N-Term(iTRAQ8plex); K12(iTRAQ8plex)	58.95	1.01594	18	0.888844	18	0.91723	18	0.947128	18	0.95204	18	0.936277	18	2	2055.08	-4.39774
dPAHPAPR	H9DW79	N-Term(iTRAQ8plex)	8.29	2.42223	1	2.95529	1	2.24305	1	1.18602	1	0.788577	1	1.71389	1	3	1164.64	-2.09366
dPASNAELEVQEk	Q6ZIQ1	N-Term(iTRAQ8plex); K13(iTRAQ8plex)	11.71	0.919569	1	0.806439	1	0.823396	1	0.976242	1	1.06184	1	1.07642	1	3	2038.09	-0.828
dPDGAYSQLIR	B9EYZ4	N-Term(iTRAQ8plex)	54.14	0.973707	1	0.964947	1	1.02452	1	1.03616	1	1.05113	1	1.08487	1	3	1538.81	-3.27368
dPDGTTQFVAGTTR	B8B8W3	N-Term(iTRAQ8plex)	30.23	1.09729	2	1.60928	2	1.71637	2	1.19012	2	1.21608	2	1.57497	2	3	1769.89	-1.41468
dPEAAFFk	Q5QMV0	N-Term(iTRAQ8plex); K8(iTRAQ8plex)	17.12	0.918419	1	0.932334	1	0.889835	1	1.0686	1	1.03521	1	1.02555	1	3	1532.86	-0.692946
dPEATTVAAGAR	A2Z2H8	N-Term(iTRAQ8plex)	18.31	1.00577	1	1.46505	1	1.48978	1	0.952325	1	1.0539	1	1.38888	1	3	1462.77	-4.36216
dPFASSAWTVR	Q6Z402	N-Term(iTRAQ8plex)	40.88	1.14095	1	1.10548	1	1.29752	1	1.32362	1	0.994367	1	1.07514	1	3	1540.8	-3.24486
dPHGNVQVAk	Q654U8	N-Term(iTRAQ8plex); K10(iTRAQ8plex)	21.53	1.06752	3	1.31211	3	1.03308	3	0.93674	3	0.961805	3	0.968705	3	3	1672.96	-1.58178
dPITAALAQSGLLEPk	Q60EI0	N-Term(iTRAQ8plex); K16(iTRAQ8plex)	18.19	1.01905	1	0.851218	1	0.984335	1	0.916547	1	0.933184	1	1.04028	1	3	2232.3	-2.25005
dPNRPFPSGQNETPLVk	B9FNT1;Q0DJ99	N-Term(iTRAQ8plex); K17(iTRAQ8plex)	3.63													3	2504.37	-1.27211
dPNTGmLVPETPSmFYAR	Q75L87	N-Term(iTRAQ8plex); M6(Oxidation); M14(Oxidation)	19.13	0.91904	1	1.04036	1	1.34256	1	1.01657	1	1.08001	1	1.13051	1	3	2362.13	-3.18191
dPNTGMLVPETPSMFyAR	Q75L87	N-Term(iTRAQ8plex); Y16(iTRAQ8plex)	14.62	1.20744	3	1.05322	3	0.984875	3	1.15465	3	0.910175	3	1.00056	3	3	2634.33	-6.6585
dPScGDAATEGLLk	Q10P12	N-Term(iTRAQ8plex); C4(Carbamidomethyl); K14(iTRAQ8plex)	54.1	0.869514	2	0.784609	2	0.764469	2	0.983747	2	1.0676	2	1.01236	2	2	2042.07	-1.23391
dPScGDATTEGLIk	B8BG04	N-Term(iTRAQ8plex); C4(Carbamidomethyl); K14(iTRAQ8plex)	57.47	0.870084	4	0.809631	4	0.839698	4	1.02117	4	1.09286	4	1.0061	4	2	2072.07	-3.36678
dPSSSAAAADAAPR	Q9SDD7	N-Term(iTRAQ8plex)	45.93	0.987213	1	1.51118	1	1.44532	1	0.893499	1	1.02678	1	1.09966	1	3	1590.8	-2.10134
dPTLAVVAYR	A3CE45	N-Term(iTRAQ8plex)	11.65	1.08893	2	1.2997	2	1.46143	2	1.16203	2	1.15471	2	1.27827	2	2	1408.81	0.632771
[truncated: 8,610 more rows]
