# Supplementary material for: Comparative Proteomic Analysis of Plasma Membrane Proteins in Rice Leaves Reveals a Vesicle Trafficking Network in Plant Immunity That Is Provoked by Blast Fungi
Source: Front Plant Sci. 2022 Apr 25;13:853195. doi: 10.3389/fpls.2022.853195 (PMC9083198; doi:10.3389/fpls.2022.853195)
Supplement: Supplementary file 5 [file Table_5.XLSX]

## Sheet: Sheet1
Supplemental Table S5. Quantification of proteins from iTRAQ analysis
Accession	Description	Coverage	Unique Peptides	Molecular Function	Cellular Component	Biological Process	Pfam IDs	114/113	114/113 Variability [%]	115/113	115/113 Variability [%]	116/113	116/113 Variability [%]	117/113	117/113 Variability [%]	118/113	118/113 Variability [%]	119/113	119/113 Variability [%]	MW [kDa]	calc. pI
Q7XPY2	Plasma membrane ATPase OS=Oryza sativa subsp. japonica GN=Os04g0656100 PE=2 SV=1 - [PMA1_ORYSJ]	46.9	29	catalytic activity; metal ion binding; nucleotide binding; transporter activity	cytoplasm; membrane; nucleus; vacuole	metabolic process; regulation of biological process; response to stimulus; transport	Pf00122; Pf00702; Pf12710	0.974188	10.2461	0.981079	17.1636	0.935179	13.2147	1.02707	9.88555	1.02624	9.70747	0.984407	9.48028	104.752	6.78564
Q7XSQ9	Probable aquaporin PIP1-2 OS=Oryza sativa subsp. japonica GN=PIP1-2 PE=2 SV=3 - [PIP12_ORYSJ]	20.49	5	transporter activity	cytoplasm; membrane; mitochondrion; vacuole	response to stimulus; transport	Pf00230	0.933059	10.1485	0.915977	15.6522	0.894764	13.2555	1.00098	9.94557	1.01315	10.2128	0.959643	8.72383	30.7279	8.63135
Q8L6I1	Os12g0638700 protein OS=Oryza sativa subsp. japonica GN=a3 PE=3 SV=1 - [Q8L6I1_ORYSJ]	46.34	12	catalytic activity; metal ion binding; nucleotide binding; transporter activity	membrane	metabolic process; response to stimulus; transport	Pf00122; Pf00690; Pf00702; Pf12710	0.944906	14.0625	0.948701	22.2998	0.942346	17.0439	1.05027	10.657	1.06577	16.6649	1.02872	15.4935	105.355	6.56592
Q8L6I3	H-ATPase OS=Oryza sativa subsp. japonica GN=a1 PE=3 SV=1 - [Q8L6I3_ORYSJ]	30.65	3	catalytic activity; metal ion binding; nucleotide binding; transporter activity	membrane	metabolic process; response to stimulus; transport	Pf00122; Pf00690; Pf00702; Pf12710	1.05741	3.55259	0.95135	13.043	0.955189	28.7155	0.985267	0.858257	1.01011	9.29791	0.930385	0.556909	105.289	6.81494
Q8H5N9	Probable aquaporin PIP2-1 OS=Oryza sativa subsp. japonica GN=PIP2-1 PE=2 SV=1 - [PIP21_ORYSJ]	26.21	6	transporter activity	membrane	transport	Pf00230	0.942175	10.8986	0.957284	23.2205	0.882621	14.5614	1.02119	13.4106	1.02206	9.67442	0.963108	11.2503	30.2658	8.42627
Q8L6I2	Os07g0191200 protein OS=Oryza sativa subsp. japonica GN=a2 PE=3 SV=1 - [Q8L6I2_ORYSJ]	37.62	14	catalytic activity; metal ion binding; nucleotide binding; transporter activity	membrane	metabolic process; response to stimulus; transport	Pf00122; Pf00690; Pf00702; Pf12710	1.03512	13.3583	1.01685	23.8864	1.06508	19.6576	1.0146	14.8362	0.985688	12.3801	0.983435	11.502	105.374	6.78564
Q6Z3Y9	Os07g0694000 protein OS=Oryza sativa subsp. japonica GN=P0627E10.3 PE=2 SV=1 - [Q6Z3Y9_ORYSJ]	51.34	26	catalytic activity; protein binding; signal transducer activity	cytoplasm; membrane; mitochondrion	cell communication; metabolic process; regulation of biological process; response to stimulus	Pf00168; Pf00387; Pf00388	0.992496	9.92217	1.02593	14.1791	0.97372	12.6708	1.0223	10.1323	1.00534	10.0415	0.979907	9.25125	67.7403	6.62451
Q6ZKC0	14-3-3-like protein GF14-C OS=Oryza sativa subsp. japonica GN=GF14C PE=1 SV=1 - [14333_ORYSJ]	64.84	8	nucleotide binding; protein binding; transporter activity	cytoplasm; membrane; mitochondrion; nucleus	response to stimulus; transport	Pf00244; Pf01496	1.00235	9.55683	0.959536	17.1135	0.981008	15.3651	0.960116	15.1139	0.990978	12.9995	0.954413	14.9088	28.8084	4.84326
P0C510	Ribulose bisphosphate carboxylase large chain OS=Oryza sativa GN=rbcL PE=3 SV=1 - [RBL_ORYSA]	34.8	8	catalytic activity; metal ion binding	cytoplasm	metabolic process	Pf00016; Pf02788	0.960089	8.9796	0.957342	17.3478	0.913235	15.0309	1.02316	8.82141	1.0336	8.44476	0.978863	10.4335	52.8475	6.68311
Q6EUP4	14-3-3-like protein GF14-E OS=Oryza sativa subsp. japonica GN=GF14E PE=2 SV=1 - [14335_ORYSJ]	55.73	2	nucleotide binding; protein binding	cytoplasm; membrane; mitochondrion; nucleus	response to stimulus	Pf00244	1.07186	16.9948	1.08124	18.1903	1.06395	20.0458	1.02526	12.8237	1.02154	21.1511	0.971992	15.4843	29.6738	4.76709
Q7XTE8	14-3-3-like protein GF14-B OS=Oryza sativa subsp. japonica GN=GF14B PE=1 SV=2 - [14332_ORYSJ]	55.73	3	nucleotide binding; protein binding	cytoplasm; membrane; mitochondrion; nucleus	response to stimulus	Pf00244	1.0344	6.31939	1.07854	9.33048	1.02996	11.1407	1.01321	7.08118	1.0047	5.88106	0.975229	7.78069	29.845	4.80518
Q7XLR1	Probable aquaporin PIP2-6 OS=Oryza sativa subsp. japonica GN=PIP2-6 PE=2 SV=2 - [PIP26_ORYSJ]	14.18	3	transporter activity	cytoplasm; membrane; nucleus; vacuole	response to stimulus; transport	Pf00230	0.894264	11.3231	0.929468	20.9916	0.8541	14.135	1.09197	11.5901	1.07374	9.71915	1.03492	10.0707	29.9437	8.96826
I6QM82	Aquaporin OS=Oryza sativa subsp. japonica GN=PIP1.1 PE=2 SV=1 - [I6QM82_ORYSJ]	22.15	4				Protein not found	0.994801	16.8074	0.934172	18.5144	0.893219	17.7603	1.04425	12.0068	0.999824	15.2791	0.99704	10.8274	30.767	8.82178
Q93W07	Os06g0568200 protein OS=Oryza sativa subsp. japonica GN=V-ATPase B PE=2 SV=1 - [Q93W07_ORYSJ]	44.67	19	catalytic activity; nucleotide binding; transporter activity	cytoplasm; membrane; vacuole	cell communication; cellular homeostasis; metabolic process; regulation of biological process; response to stimulus; transport	Pf00006; Pf00306; Pf02874	0.984835	11.4804	0.964148	14.8233	0.96451	14.5206	0.986116	10.5514	1.01272	10.3864	0.970763	10.7721	54.0246	5.18604
O22541	Transmembrane protein OS=Oryza sativa PE=2 SV=1 - [O22541_ORYSA]	14.19	2	transporter activity	cytoplasm; membrane; mitochondrion; vacuole	response to stimulus; transport	Pf00230	0.824494	9.93079	0.659803	24.3311	0.681329	23.5797	0.912946	14.0373	1.0467	9.64988	0.902226	12.8958	31.0342	9.17334
B7E4J4	cDNA clone:006-305-B07, full insert sequence OS=Oryza sativa subsp. japonica PE=2 SV=1 - [B7E4J4_ORYSJ]	42.01	13	metal ion binding			Pf00191	1.0067	13.8406	1.11146	16.3563	0.939511	13.3953	1.08994	11.1341	1.04301	12.5123	1.03589	11.5949	35.347	6.96143
P51431	Ubiquitin-40S ribosomal protein S27a-2 OS=Oryza sativa subsp. japonica GN=RPS27AB PE=2 SV=3 - [R27AB_ORYSJ]	62.58	2	metal ion binding; protein binding; structural molecule activity	cytoplasm; nucleus; ribosome	metabolic process	Pf00240; Pf01599; Pf11976	1.03835	8.96927	1.08843	18.3754	0.944455	12.8298	1.01877	6.18623	0.964065	9.6986	0.936548	8.55842	17.6715	9.80322
Q0IPF7	Os12g0207600 protein OS=Oryza sativa subsp. japonica GN=Os12g0207600 PE=3 SV=1 - [Q0IPF7_ORYSJ]	20.38	2	catalytic activity; metal ion binding; structural molecule activity	cytoplasm; ribosome	metabolic process	Pf00016; Pf00312; Pf02788	1.17468	6.14457	1.21004	9.6621	1.17682	6.67437	0.807737	6.92283	0.79541	11.8992	0.777151	10.0503	58.9942	8.85107
Q2R2W2	14-3-3-like protein GF14-D OS=Oryza sativa subsp. japonica GN=GF14D PE=2 SV=1 - [14334_ORYSJ]	48.3	6	nucleotide binding; protein binding	cytoplasm; membrane; mitochondrion; nucleus	response to stimulus	Pf00244	1.02511	12.4765	0.923913	10.7846	0.993268	11.6935	0.914826	11.6478	0.971161	10.7616	0.972643	14.453	29.2436	4.90674
Q9ARZ9	Ubiquitin-40S ribosomal protein S27a-1 OS=Oryza sativa subsp. japonica GN=RPS27AA PE=2 SV=1 - [R27AA_ORYSJ]	63.23	2	metal ion binding; protein binding; structural molecule activity	cytoplasm; nucleus; ribosome	metabolic process	Pf00240; Pf01599; Pf11976	1.05717	14.784	0.973187	10.673	0.994203	21.0776	1.08939	13.2118	1.03467	12.4121	1.03004	18.5741	17.6574	9.77393
P0C030	Ubiquitin-NEDD8-like protein RUB1 OS=Oryza sativa subsp. japonica GN=RUB1 PE=2 SV=2 - [RUB1_ORYSJ]	40.52	1	protein binding	cytoplasm; nucleus		Pf00240; Pf11976	1.1441	7.40903	1.17907	5.09313	1.29289	15.2472	0.935661	0.68866	0.938014	7.54374	1.04307	17.9712	17.1192	6.06201
A6N0C7	Polyubiquitin containing 7 ubiquitin monomers (Fragment) OS=Oryza sativa subsp. indica PE=2 SV=1 - [A6N0C7_ORYSI]	62.19	1	protein binding		response to stimulus	Pf00240; Pf11976	1.08227		0.958244		0.901122		1.13924		1.27919		1.10138		22.6271	8.27979
Q06967	14-3-3-like protein GF14-F OS=Oryza sativa subsp. japonica GN=GF14F PE=1 SV=2 - [14336_ORYSJ]	66.92	10	catalytic activity; enzyme regulator activity; nucleotide binding; protein binding	cytoplasm; membrane; mitochondrion; nucleus	metabolic process; regulation of biological process; response to stimulus	Pf00244	1.03394	8.73172	1.02324	18.6345	1.02242	14.4938	0.983997	10.6356	0.996128	10.5581	0.964106	10.2876	29.1596	4.88135
Q6YY47	Os02g0588500 protein OS=Oryza sativa subsp. japonica GN=OSJNBb0046O12.21 PE=4 SV=1 - [Q6YY47_ORYSJ]	26.57	15	catalytic activity	cytoplasm; extracellular; membrane	cell differentiation; cell growth; cell organization and biogenesis; development; metabolic process	Pf03009	0.96963	15.2257	0.980401	21.635	0.991614	21.92	1.02727	11.872	0.994895	11.2381	0.972284	11.4838	81.0329	6.0874
Q6ASY2	Non-specific lipid transfer protein-like 1 OS=Oryza sativa subsp. japonica GN=LTPL1 PE=1 SV=1 - [NLTL1_ORYSJ]	29.21	4	catalytic activity	cytoplasm; membrane; vacuole	metabolic process; transport	Pf00234	0.937888	12.3675	0.918033	15.5983	0.871756	13.678	1.06949	9.1828	1.06141	7.95238	1.00749	9.55507	16.8877	8.25049
H2KWU8	5-methyltetrahydropteroyltriglutamate-homocysteine methyltransferase, putative, expressed OS=Oryza sativa subsp. japonica GN=LOC_Os12g42884 PE=3 SV=1 - [H2KWU8_ORYSJ]	24.8	2	catalytic activity; metal ion binding		metabolic process	Pf01717; Pf08267	1.05522	12.3857	0.966504	11.2273	0.999628	15.0413	0.953981	16.2588	0.985306	6.49115	0.916611	5.49394	84.5824	6.30322
Q2QLY5	5-methyltetrahydropteroyltriglutamate-homocysteine methyltransferase OS=Oryza sativa subsp. japonica GN=LOC_Os12g42884 PE=2 SV=1 - [Q2QLY5_ORYSJ]	24.8	2	catalytic activity; metal ion binding	cytoplasm; cytosol; extracellular; membrane	metabolic process; response to stimulus	Pf01717; Pf08267	0.96753	13.2539	1.01843	14.2855	1.07743	1.90417	0.957367	14.4053	1.00235	7.11436	0.987375	8.70041	84.5315	6.30322
Q53NM9	DnaK-type molecular chaperone hsp70-rice OS=Oryza sativa subsp. japonica GN=Os11g0703900 PE=3 SV=1 - [Q53NM9_ORYSJ]	45.3	4	nucleotide binding		cell organization and biogenesis; response to stimulus	Pf00012; Pf06723	1.04556	7.2517	1.06361	7.94634	1.02233	7.52212	0.973513	6.52925	0.999806	7.66987	0.974514	6.94978	71.1402	5.21143
A2YCI2	Putative uncharacterized protein OS=Oryza sativa subsp. indica GN=OsI_22823 PE=3 SV=1 - [A2YCI2_ORYSI]	14.11	3	transporter activity	cytoplasm; membrane; vacuole	transport	Pf00230	0.903917	21.2829	0.908408	23.0225	0.920709	17.4112	1.12806	21.6788	1.07458	15.231	1.0264	15.0453	24.9839	6.11279
Q10NA9	70 kDa heat shock protein OS=Oryza sativa subsp. japonica GN=Os03g0276500 PE=2 SV=1 - [Q10NA9_ORYSJ]	44.31	8	nucleotide binding		cell organization and biogenesis; response to stimulus	Pf00012; Pf06723	1.03917	11.2723	1.01127	14.0148	0.99682	14.2246	0.967432	10.633	0.95703	10.5117	0.935579	12.3399	71.0559	5.21143
Q84TA1	Heat shock cognate 70 kDa protein 2, putative, expressed OS=Oryza sativa subsp. japonica GN=OJ1754_E06.25 PE=2 SV=1 - [Q84TA1_ORYSJ]	33.28	3	nucleotide binding		cell organization and biogenesis; response to stimulus	Pf00012; Pf06723	1.04556	0.964025	1.23529	2.60803	1.02651	15.2534	1.17576	5.09453	0.959197	26.3769	0.983192	18.0243	71.2672	5.21143
Q651T8	Os06g0662000 protein OS=Oryza sativa subsp. japonica GN=OSJNBa0051O02.43 PE=3 SV=1 - [Q651T8_ORYSJ]	44.19	12	catalytic activity; nucleotide binding; transporter activity	cytoplasm; membrane; vacuole	cell organization and biogenesis; development; metabolic process; response to stimulus; transport	Pf00006; Pf00306; Pf02874	0.97598	8.07946	0.942656	10.0939	0.961877	10.195	0.965615	8.16714	0.995979	8.77143	0.955979	7.97023	68.4257	5.33838
Q5TKJ2	Os05g0429400 protein OS=Oryza sativa subsp. japonica GN=OSJNBb0048I21.5 PE=4 SV=1 - [Q5TKJ2_ORYSJ]	62.39	23		membrane	transport	Pf00650; Pf03765	0.978161	10.0503	0.917338	15.5469	0.948494	16.9762	0.991219	14.0961	1.01276	13.1756	0.974996	13.6855	63.9086	4.60205
Q943K7	70 kDa heat shock protein OS=Oryza sativa subsp. japonica GN=P0031D11.41 PE=2 SV=1 - [Q943K7_ORYSJ]	28.86	1	nucleotide binding		cell organization and biogenesis; response to stimulus	Pf00012; Pf06723	1.00176	4.78159	0.921802	13.221	0.952933	10.6181	1.05905	8.74441	1.09003	11.4441	1.07407	8.48447	70.907	5.21143
A2YI72	Putative uncharacterized protein OS=Oryza sativa subsp. indica GN=OsI_24908 PE=4 SV=1 - [A2YI72_ORYSI]	26.4	19		cytoplasm; membrane; vacuole		Pf02714	1.0143	7.28254	0.99267	11.3098	0.958389	10.3334	0.948517	9.33843	0.948408	9.11929	0.909384	10.0753	82.008	9.29053
Q6L4S3	Os05g0591900 protein OS=Oryza sativa subsp. japonica GN=P0663C08.5 PE=2 SV=1 - [Q6L4S3_ORYSJ]	51.74	11		membrane		Pf01145	0.932828	10.4845	0.998747	14.0757	0.968868	14.3211	1.01809	12.3285	1.0064	15.6134	0.986388	13.4327	31.6013	6.41748
A2X7G8	Putative uncharacterized protein OS=Oryza sativa subsp. indica GN=OsI_08158 PE=3 SV=1 - [A2X7G8_ORYSI]	23.61	6	transporter activity	cytoplasm; membrane; vacuole	response to stimulus; transport	Pf00230	0.989158	8.75197	1.0177	21.1234	0.977369	20.911	1.015	15.1914	1.00919	14.7646	0.95575	11.2974	30.4489	7.40088
P50156	Probable aquaporin TIP1-1 OS=Oryza sativa subsp. japonica GN=TIP1-1 PE=2 SV=1 - [TIP11_ORYSJ]	6.8	1	transporter activity	cytoplasm; endoplasmic reticulum; membrane; vacuole	defense response; response to stimulus; transport	Pf00230	0.894815	12.1713	0.950913	14.0877	0.880192	13.254	1.15046	10.2705	1.08343	13.1148	1.09918	12.4284	25.6834	6.50732
A2WMG6	Salt stress root protein RS1 OS=Oryza sativa subsp. indica GN=OsI_001009 PE=1 SV=1 - [SRS1_ORYSI]	69.61	14		cytoplasm; mitochondrion		Pf05558	1.03417	9.86099	1.0133	13.0147	0.969296	11.6985	0.948413	11.2387	0.935926	9.98842	0.883853	11.1136	21.7875	4.91943
Q84J55	14-3-3-like protein GF14-A OS=Oryza sativa subsp. japonica GN=GF14A PE=2 SV=1 - [14331_ORYSJ]	51.52	8	protein binding	cytoplasm; cytosol; membrane; nucleus	cell communication; defense response; regulation of biological process; response to stimulus	Pf00244	1.01816	13.3406	0.963559	16.8854	1.05299	21.9168	1.00101	15.3325	1.02993	16.6954	1.00877	13.5309	28.9824	4.94482
Q6L509	Os05g0460000 protein OS=Oryza sativa subsp. japonica GN=OJ1281_H05.5 PE=2 SV=1 - [Q6L509_ORYSJ]	30.34	1	nucleotide binding		cell organization and biogenesis	Pf00012; Pf06723	1.00916		1.21794		1.41546		0.956283		1.04585		1.11978		70.7909	5.21143
Q10SU0	Os03g0111200 protein OS=Oryza sativa subsp. japonica GN=Os03g0111200 PE=2 SV=1 - [Q10SU0_ORYSJ]	53.71	11		cytoplasm; membrane; vacuole		Pf03763	0.946378	9.73545	0.902	14.8609	0.87772	13.0555	1.0142	11.7714	1.06281	9.73694	0.975314	10.4244	19.5215	8.1626
B8ABJ9	Putative uncharacterized protein OS=Oryza sativa subsp. indica GN=OsI_02797 PE=4 SV=1 - [B8ABJ9_ORYSI]	27.63	13	catalytic activity; nucleotide binding	cytoplasm; membrane	metabolic process	Pf00069; Pf07714; Pf08263; Pf12799	0.97255	9.43158	1.00726	13.8662	0.967534	13.155	1.02032	9.29925	1.03133	9.74598	1.0028	10.8803	70.5941	7.51807
A2XHR1	Sucrose synthase OS=Oryza sativa subsp. indica GN=OsI_11950 PE=3 SV=1 - [A2XHR1_ORYSI]	30.02	17	catalytic activity	cytoplasm; membrane; vacuole	metabolic process; response to stimulus	Pf00534; Pf00862	0.955066	9.78895	1.00385	20.1938	0.932429	10.9272	1.07858	11.9288	1.03982	10.6127	1.0268	10.1382	92.8651	6.37939
Q8LQN2	Os01g0784800 protein OS=Oryza sativa subsp. japonica GN=B1070A12.15 PE=2 SV=1 - [Q8LQN2_ORYSJ]	35.96	4	catalytic activity; nucleotide binding	cytoplasm; membrane; vacuole	metabolic process; regulation of biological process; response to stimulus	Pf00258; Pf02525; Pf03358	1.02407	14.0318	1.02258	16.6383	0.961827	16.6056	0.995998	15.7528	0.962601	15.0466	0.92592	15.8353	21.6908	6.53662
Q6K4S7	Os02g0285300 protein OS=Oryza sativa subsp. japonica GN=OSJNBa0018M09.30 PE=2 SV=1 - [Q6K4S7_ORYSJ]	54.74	14	metal ion binding; protein binding	cytoplasm; vacuole	defense response; response to stimulus	Pf05558	0.908118	10.254	0.827376	13.3734	0.839077	13.1058	1.02389	9.56736	1.03321	9.30903	0.98758	10.2053	24.0335	4.7417
Q6ZIV7	Hypersensitive-induced response protein OS=Oryza sativa subsp. japonica GN=OJ1198_B10.17 PE=2 SV=1 - [Q6ZIV7_ORYSJ]	41.2	9		cytoplasm; membrane; vacuole		Pf01145	0.947357	9.91685	0.922717	14.6345	0.936005	13.2432	1.03067	8.91129	1.04833	12.113	0.988396	8.24486	31.3601	5.35107
A3CE45	Putative uncharacterized protein OS=Oryza sativa subsp. japonica GN=OsJ_34910 PE=4 SV=1 - [A3CE45_ORYSJ]	28.22	44	protein binding; structural molecule activity	cytoplasm; Golgi; membrane; vacuole	transport	Pf00637; Pf09268	0.938254	9.89221	0.929743	13.7207	0.933655	13.391	1.01915	8.88802	1.02967	8.64053	0.99149	9.40494	193.239	5.38916
P40392	Ras-related protein RIC1 OS=Oryza sativa subsp. japonica GN=RIC1 PE=2 SV=2 - [RIC1_ORYSJ]	58.91	7	nucleotide binding	cytoplasm; membrane; nucleus	cell communication; regulation of biological process; response to stimulus; transport	Pf00025; Pf00071; Pf04670; Pf08477	0.942237	9.26654	0.869561	10.2784	0.893461	11.0236	1.04418	12.8756	1.05072	8.81167	1.00535	13.795	22.4622	5.2749
Q42971	Enolase OS=Oryza sativa subsp. japonica GN=ENO1 PE=1 SV=2 - [ENO_ORYSJ]	47.53	4	catalytic activity; metal ion binding	cell surface; cytoplasm; cytosol	metabolic process	Pf00113; Pf03952	0.985976	8.14761	0.927618	9.8624	0.913644	8.78576	0.96847	8.07298	0.944415	10.2886	0.933913	8.10111	47.9424	5.56689
P45960	Tubulin beta-4 chain OS=Oryza sativa subsp. japonica GN=TUBB4 PE=2 SV=1 - [TBB4_ORYSJ]	42.73	1	catalytic activity; nucleotide binding; structural molecule activity	cytoplasm; cytoskeleton	cell organization and biogenesis; cellular component movement; metabolic process	Pf00091; Pf03953	0.722267	19.8637	0.72355	28.4013	0.775189	28.8134	1.16722	23.4785	1.23199	32.9278	1.22321	27.2574	50.2568	4.85596
Q43594	Tubulin beta-1 chain OS=Oryza sativa subsp. japonica GN=TUBB1 PE=2 SV=2 - [TBB1_ORYSJ]	38.93	1	catalytic activity; nucleotide binding; structural molecule activity	cytoplasm; cytoskeleton	cell organization and biogenesis; cellular component movement; metabolic process	Pf00091; Pf03953	0.628783		0.572158		0.617994		1.31024		1.33821		1.29377		50.2528	4.83057
Q76FS3	Tubulin beta-6 chain OS=Oryza sativa subsp. japonica GN=TUBB6 PE=2 SV=1 - [TBB6_ORYSJ]	39.19	1	catalytic activity; nucleotide binding; structural molecule activity	cytoplasm; cytoskeleton; membrane	cell organization and biogenesis; cellular component movement; metabolic process; response to stimulus	Pf00091; Pf03953	0.808249	11.4317	0.746983	9.32555	0.778459	14.2327	1.10502	8.91947	1.17538	10.2977	1.18276	6.06255	49.8537	4.90674
Q0JJQ7	Malic enzyme (Fragment) OS=Oryza sativa subsp. japonica GN=Os01g0723400 PE=3 SV=1 - [Q0JJQ7_ORYSJ]	24.16	9	catalytic activity; metal ion binding; nucleotide binding; protein binding	cytoplasm; cytosol; extracellular; membrane	cell organization and biogenesis; metabolic process; response to stimulus	Pf00390; Pf03949	1.07291	8.72139	0.99901	11.4081	1.0555	8.81097	0.896499	11.0593	0.905575	9.85089	0.878085	11.0225	65.2398	8.39697
Q6EUQ9	Os02g0175400 protein OS=Oryza sativa subsp. japonica GN=OJ1077_E05.10 PE=3 SV=1 - [Q6EUQ9_ORYSJ]	32.05	5	catalytic activity; nucleotide binding; transporter activity	cytoplasm; membrane; vacuole	cell organization and biogenesis; development; metabolic process; response to stimulus; transport	Pf00006; Pf00306; Pf02874	0.987065	4.76433	1.0118	7.01515	0.966531	7.08071	1.01071	6.75972	1.03001	6.10418	1.00772	7.45201	68.5479	5.52881
Q8H811	Leucine Rich Repeat family protein, expressed OS=Oryza sativa subsp. japonica GN=OJ1743A09.16 PE=2 SV=1 - [Q8H811_ORYSJ]	29.63	16	catalytic activity; nucleotide binding; protein binding	cytoplasm; membrane	metabolic process	Pf00069; Pf07714; Pf08263	0.952758	10.1571	0.989606	13.5725	0.923571	13.1709	1.06556	8.84544	1.06695	9.07624	1.02789	8.64147	70.7075	7.04932
B9GCD1	Putative uncharacterized protein OS=Oryza sativa subsp. japonica GN=OsJ_35570 PE=3 SV=1 - [B9GCD1_ORYSJ]	35.16	21	catalytic activity; nucleotide binding; protein binding	cytoplasm; membrane; vacuole	metabolic process	Pf00069; Pf07714	0.959533	12.562	0.939717	16.5125	0.9265	16.0837	1.04646	11.5769	1.03352	9.81986	1.00431	10.8789	104.024	7.12256
B8BBB2	Putative uncharacterized protein OS=Oryza sativa subsp. indica GN=OsI_29480 PE=4 SV=1 - [B8BBB2_ORYSI]	38.5	5		cytoplasm			0.893887	13.5075	0.845155	13.0223	0.86295	13.0028	1.05885	12.4136	1.0453	12.531	1.02177	11.7141	23.3097	8.104
A2YA91	Sucrose synthase OS=Oryza sativa subsp. indica GN=OsI_22003 PE=3 SV=1 - [A2YA91_ORYSI]	30.6	15	catalytic activity	cytoplasm; membrane; mitochondrion; vacuole	metabolic process; response to stimulus	Pf00534; Pf00862	1.05914	8.69887	1.05305	11.1813	1.05659	11.8395	0.97055	10.8501	0.922933	9.83487	0.920004	10.0051	91.5667	6.39209
A3ANA0	Putative uncharacterized protein OS=Oryza sativa subsp. japonica GN=OsJ_12810 PE=3 SV=1 - [A3ANA0_ORYSJ]	43.02	2	catalytic activity; nucleotide binding; structural molecule activity	cytoplasm; cytoskeleton; membrane; vacuole	cell growth; cell organization and biogenesis; cellular component movement; metabolic process; response to stimulus	Pf00091; Pf03953	1.06903	5.36384	0.992274	12.0958	0.97899	16.061	0.984771	8.36601	1.03413	9.0142	0.967044	10.0378	49.7407	4.86865
Q8RYZ1	Cytosolic factor-like protein OS=Oryza sativa subsp. japonica GN=P0648C09.9 PE=2 SV=1 - [Q8RYZ1_ORYSJ]	40.62	2		membrane	transport	Pf00650; Pf03765	0.958094	12.9332	0.984252	40.2972	0.85547	13.9254	1.136	13.8179	1.0449	3.30259	0.937344	5.83849	66.4168	4.66553
Q75L45	Os05g0135800 protein OS=Oryza sativa subsp. japonica GN=OJ1127_B08.1 PE=2 SV=1 - [Q75L45_ORYSJ]	37.4	9	catalytic activity; nucleotide binding	membrane	metabolic process	Pf00069; Pf07714	0.974253	9.16638	0.973954	16.8391	0.955957	11.0917	1.02314	7.57965	1.01802	9.025	0.994079	8.66034	39.2861	7.79639
A2WXH7	Putative uncharacterized protein OS=Oryza sativa subsp. indica GN=OsI_04628 PE=4 SV=1 - [A2WXH7_ORYSI]	40	1		membrane	transport	Pf00650; Pf03765	0.951413		1.07165		0.969628		1.22317		0.891136		1.03231		66.1887	4.67822
A2WN93	Calmodulin-1 OS=Oryza sativa subsp. indica GN=CAM1-1 PE=1 SV=2 - [CALM1_ORYSI]	43.62	6	metal ion binding	cytoplasm; membrane; vacuole	cell communication; development; regulation of biological process; reproduction; response to stimulus	Pf00036; Pf08726; Pf12763	0.990815	11.3576	0.971123	11.1467	0.979273	10.7886	1.05805	12.0973	1.12937	11.574	1.04952	11.9164	16.8209	4.27197
Q84TA8	Ethylene-responsive small GTP-binding protein OS=Oryza sativa subsp. japonica GN=OJ1754_E06.16 PE=2 SV=1 - [Q84TA8_ORYSJ]	45.79	2	nucleotide binding	cytoplasm; membrane; vacuole	cell communication; regulation of biological process; response to stimulus; transport	Pf00025; Pf00071; Pf08477	0.821421	2.91057	0.761568	4.78115	0.75114	10.4423	1.04939	1.96673	1.14434	9.24968	1.07875	4.05002	23.7642	7.81104
O49148	Harpin induced gene 1 homolog OS=Oryza sativa GN=Hin1 PE=2 SV=1 - [O49148_ORYSA]	39.02	5		cytoplasm		Pf03168	0.966369	11.3136	0.898262	16.2774	0.925648	15.4212	0.995092	10.2688	1.01669	9.43428	0.970611	13.6179	22.2185	8.85107
Q6L502	Os05g0461300 protein OS=Oryza sativa subsp. japonica GN=OJ1281_H05.12 PE=2 SV=1 - [Q6L502_ORYSJ]	43.06	1	nucleotide binding	cytoplasm; membrane; vacuole	cell communication; regulation of biological process; response to stimulus; transport	Pf00025; Pf00071; Pf08477	0.808753		0.911808		0.834182		1.07636		1.15798		1.10369		23.9023	8.22119
Q7XHP7	Os07g0239400 protein OS=Oryza sativa subsp. japonica GN=P0565A07.136 PE=2 SV=1 - [Q7XHP7_ORYSJ]	45.12	1	nucleotide binding	cytoplasm; membrane; vacuole	cell communication; regulation of biological process; response to stimulus; transport	Pf00025; Pf00071; Pf08477	0.982109	3.57375	1.05968	34.6827	1.03725	38.8029	1.1123	16.5823	1.05988	20.4077	1.07774	0.694066	23.9783	7.81104
Q40665	Tubulin beta-3 chain OS=Oryza sativa subsp. japonica GN=TUBB3 PE=2 SV=2 - [TBB3_ORYSJ]	39.91	2	catalytic activity; nucleotide binding; structural molecule activity	cytoplasm; cytoskeleton; membrane	cell organization and biogenesis; cellular component movement; metabolic process; response to stimulus	Pf00091; Pf03953; Pf10644	0.91773	2.3079	0.874151	14.8379	0.864916	2.45051	0.990533	1.67314	1.02734	3.78708	0.967731	6.72089	50.0888	4.83057
Q8H7U1	Tubulin beta-2 chain OS=Oryza sativa subsp. japonica GN=TUBB2 PE=2 SV=1 - [TBB2_ORYSJ]	40.72	2	catalytic activity; nucleotide binding; structural molecule activity	cytoplasm; cytoskeleton; membrane; nucleus; organelle lumen; vacuole	cell organization and biogenesis; cellular component movement; metabolic process; response to stimulus	Pf00091; Pf03953	0.910538	29.2722	0.884051	42.167	0.833637	24.2864	1.13688	10.2698	1.14324	16.6328	1.2235	4.60575	50.1498	4.83057
B8AK24	Putative uncharacterized protein OS=Oryza sativa subsp. indica GN=OsI_10758 PE=3 SV=1 - [B8AK24_ORYSI]	39.55	1	catalytic activity; metal ion binding	cell surface; cytoplasm; cytosol; membrane	metabolic process	Pf00113; Pf03952	0.922005		0.90606		0.918148		0.969812		1.05479		0.920919		47.9564	5.46533
Q6H4L2	Elongation factor 2 OS=Oryza sativa subsp. japonica GN=P0461D06.32 PE=2 SV=1 - [Q6H4L2_ORYSJ]	22.78	2	catalytic activity; metal ion binding; nucleotide binding; RNA binding	cytoplasm; cytosol; membrane; nucleus; organelle lumen	metabolic process; response to stimulus	Pf00009; Pf00679; Pf03144; Pf03764	0.976602	2.14678	0.956138	14.8488	0.978611	13.4165	0.925618	4.16633	0.940093	6.54666	0.921362	10.386	93.9605	6.16357
Q7XTK1	Elongation factor OS=Oryza sativa subsp. japonica GN=OSJNBa0020P07.3 PE=2 SV=2 - [Q7XTK1_ORYSJ]	22.89	2	catalytic activity; metal ion binding; nucleotide binding; RNA binding	cytoplasm; cytosol; membrane; nucleus; organelle lumen	metabolic process; response to stimulus	Pf00009; Pf00679; Pf03144; Pf03764	1.01684	4.70804	1.01467	3.72135	1.02426	8.87074	0.972225	0.632933	0.977599	0.824405	0.952121	2.90575	93.9126	6.16357
Q8SA35	Os01g0659200 protein OS=Oryza sativa subsp. japonica GN=P0684E06.9 PE=2 SV=1 - [Q8SA35_ORYSJ]	30.87	8	catalytic activity; nucleotide binding; transporter activity	cytoplasm; cytosol; membrane; ribosome; vacuole	cell organization and biogenesis; defense response; metabolic process; response to stimulus; transport	Pf01991	0.96328	7.28923	0.900411	8.55633	0.90598	10.5653	0.99036	6.32931	1.00762	6.76193	0.963008	5.99037	26.613	7.37158
Q0JQ62	Os01g0179700 protein OS=Oryza sativa subsp. japonica GN=Os01g0179700 PE=2 SV=1 - [Q0JQ62_ORYSJ]	50.25	1	nucleotide binding	cytoplasm; nucleus	cell communication; regulation of biological process; response to stimulus; transport	Pf00025; Pf00071; Pf04670; Pf08477; Pf09439	0.962732	14.493	1.0977	12.9465	0.95523	12.2526	1.02032	11.6526	0.970738	12.5445	0.974727	9.92729	22.5062	5.70654
Q6H8G2	Os02g0653800 protein OS=Oryza sativa subsp. japonica GN=P0491E01.39 PE=2 SV=1 - [Q6H8G2_ORYSJ]	50.25	1	nucleotide binding	cytoplasm; nucleus	cell communication; regulation of biological process; response to stimulus; transport	Pf00025; Pf00071; Pf04670; Pf08477; Pf09439	0.97275	7.45882	1.06304	9.60284	0.943879	6.82417	0.978237	9.39705	1.02276	11.3908	0.950035	8.31597	22.4902	5.70654
Q8S718	Glutathione S-transferase GSTU6, putative, expressed OS=Oryza sativa subsp. japonica GN=OSJNBa0034L04.2 PE=2 SV=1 - [Q8S718_ORYSJ]	45.23	8	catalytic activity; protein binding	cytoplasm	development; metabolic process; response to stimulus	Pf02798	1.09114	9.13201	1.02395	12.7221	1.04359	13.0365	0.859845	13.0803	0.865324	15.5632	0.839067	13.0378	25.6554	5.51611
B8BAL7	Putative uncharacterized protein OS=Oryza sativa subsp. indica GN=OsI_27744 PE=4 SV=1 - [B8BAL7_ORYSI]	28.05	4	metal ion binding	cytoplasm		Pf02298	1.05156	9.85163	1.05849	15.0795	1.04301	11.8808	1.02068	7.63161	0.954419	11.6252	0.969831	8.59095	16.9016	6.75635
Q6ZKZ4	Putative ras-related protein OS=Oryza sativa subsp. japonica GN=OJ1715_A07.14 PE=2 SV=1 - [Q6ZKZ4_ORYSJ]	36.28	4	nucleotide binding		cell communication; regulation of biological process; response to stimulus; transport	Pf00025; Pf00071; Pf08477	0.899697	4.03834	1.07312	23.1965	0.905525	19.6783	1.09276	2.4395	1.03612	7.78281	1.04215	4.11736	24.0262	7.85498
A3ACC3	Putative uncharacterized protein OS=Oryza sativa subsp. japonica GN=OsJ_08742 PE=4 SV=1 - [A3ACC3_ORYSJ]	12.82	5		membrane			0.945942	10.6679	0.865522	15.0941	0.894995	11.8591	0.990902	14.7847	1.02489	17.1096	0.988331	13.8438	60.7662	7.82568
Q75LJ9	Harpin-induced protein 1 containing protein, expressed OS=Oryza sativa subsp. japonica GN=OSJNBa0096I06.6 PE=2 SV=1 - [Q75LJ9_ORYSJ]	25	4				Pf03168	0.973553	9.07759	0.940061	13.4899	0.974233	13.7152	0.960097	9.43364	0.94475	11.3465	0.938449	10.1673	22.7849	9.31982
Q9LI00	6-phosphogluconate dehydrogenase, decarboxylating 1 OS=Oryza sativa subsp. japonica GN=G6PGH1 PE=2 SV=1 - [6PGD1_ORYSJ]	33.33	13	catalytic activity; nucleotide binding	cytoplasm	metabolic process; response to stimulus	Pf00393; Pf03446	1.01431	8.92031	0.945487	10.1937	0.949561	9.51611	0.921759	9.48068	0.946218	8.17737	0.906985	8.80082	52.6878	6.17627
B9FCI1	Putative uncharacterized protein OS=Oryza sativa subsp. japonica GN=OsJ_16159 PE=4 SV=1 - [B9FCI1_ORYSJ]	21.18	3	catalytic activity; nucleotide binding	cytoplasm; membrane	metabolic process	Pf00069; Pf07714; Pf11721; Pf12819	0.990011	12.6661	1.05617	5.34256	0.998793	12.8195	0.953916	12.5111	0.9621	5.35665	0.964231	17.1235	109.025	7.56201
Q84VE1	Adenosylhomocysteinase OS=Oryza sativa subsp. japonica GN=OsJ_33804 PE=2 SV=1 - [Q84VE1_ORYSJ]	39.59	18	catalytic activity; metal ion binding	cytoplasm; membrane; vacuole	cell organization and biogenesis; metabolic process; regulation of biological process; transport	Pf00670; Pf02254; Pf02826; Pf02882; Pf05221	1.01174	7.9728	0.961838	10.8283	0.946194	11.2604	0.937209	8.56234	0.960452	10.3198	0.897212	9.39856	53.176	5.89697
O64937	Elongation factor 1-alpha OS=Oryza sativa subsp. japonica GN=REFA1 PE=2 SV=2 - [EF1A_ORYSJ]	32.66	14	catalytic activity; nucleotide binding; RNA binding	cytoplasm; membrane; mitochondrion; nucleus; organelle lumen; vacuole	metabolic process; response to stimulus	Pf00009; Pf03143; Pf03144	1.02931	9.90035	1.08243	15.1893	0.991817	14.6902	0.995583	10.8773	0.963413	11.3557	0.9502	11.3445	49.2617	9.05615
Q7XDC8	Malate dehydrogenase, cytoplasmic OS=Oryza sativa subsp. japonica GN=Os10g0478200 PE=1 SV=3 - [MDHC_ORYSJ]	39.76	11	catalytic activity; nucleotide binding	cytoplasm; extracellular; membrane; nucleus; vacuole	metabolic process; response to stimulus	Pf00056; Pf02866	1.04381	9.27852	1.02145	23.0181	0.990586	16.9746	0.944915	19.2049	0.931776	16.6785	0.907217	18.0555	35.5461	6.0874
P53683	Calcium-dependent protein kinase isoform 2 OS=Oryza sativa subsp. japonica GN=CPK2 PE=2 SV=2 - [CDPK2_ORYSJ]	43.53	18	catalytic activity; metal ion binding; nucleotide binding	membrane	metabolic process	Pf00036; Pf00069; Pf07714	0.986282	11.5019	0.954527	17.5086	0.999403	16.5397	1.04093	8.12745	1.03805	10.2005	1.04133	11.5202	59.4678	6.32861
A2XXK2	Putative uncharacterized protein OS=Oryza sativa subsp. indica GN=OsI_17410 PE=3 SV=1 - [A2XXK2_ORYSI]	19.08	1	catalytic activity; nucleotide binding	cytoplasm; membrane	metabolic process	Pf00069; Pf07714; Pf11721; Pf12819	0.963989		0.904495		0.868029		0.936919		1.01693		0.858501		100.734	7.56201
B8AS56	Putative uncharacterized protein OS=Oryza sativa subsp. indica GN=OsI_18064 PE=3 SV=1 - [B8AS56_ORYSI]	27.7	3	nucleotide binding	cytoplasm; membrane; nucleus	cell communication; regulation of biological process; response to stimulus; transport	Pf00025; Pf00071; Pf04670; Pf08477	0.964111	8.02033	0.956641	18.6398	1.01524	10.9796	1.03073	4.53377	1.03971	7.22775	0.982142	2.3272	23.5548	5.5415
Q2R4A1	40S ribosomal protein S5, putative, expressed OS=Oryza sativa subsp. japonica GN=Os11g0482000 PE=2 SV=1 - [Q2R4A1_ORYSJ]	36.68	8	RNA binding; structural molecule activity	cytoplasm; ribosome	metabolic process	Pf00177	1.01936	10.9202	1.01037	14.6119	1.05883	18.9939	1.03184	11.4708	1.02271	13.6889	1.02908	12.6772	22.1928	9.70068
A2YDY2	60S ribosomal protein L11 OS=Oryza sativa subsp. indica GN=RPL11 PE=2 SV=2 - [RL11_ORYSI]	21.98	1	RNA binding; structural molecule activity	cytoplasm; ribosome	metabolic process	Pf00281; Pf00673	0.907594	8.17076	0.85189	8.83945	0.859743	6.35594	0.982022	8.25828	1.01357	6.88468	0.98652	3.21781	20.8229	9.92041
B8ADH7	Phospholipase D OS=Oryza sativa subsp. indica GN=OsI_00588 PE=3 SV=1 - [B8ADH7_ORYSI]	23.89	13	catalytic activity; metal ion binding; protein binding	cytoplasm; membrane; mitochondrion; nucleus	cell communication; development; metabolic process; regulation of biological process; response to stimulus	Pf00614; Pf12357	1.06052	10.461	1.05943	16.4058	1.04734	12.5269	0.955304	10.9905	0.93358	11.9779	0.926582	12.388	92.1601	6.06201
A3ADU2	Putative uncharacterized protein OS=Oryza sativa subsp. japonica GN=OsJ_09304 PE=4 SV=1 - [A3ADU2_ORYSJ]	42.37	11	catalytic activity; nucleotide binding; protein binding		metabolic process	Pf00069; Pf07714	1.00635	9.355	0.980878	15.2402	0.986469	12.5592	0.985584	7.49322	0.995731	7.95633	0.981693	9.44867	59.3643	6.43018
Q01HT5	B0403H10-OSIGBa0105A11.13 protein OS=Oryza sativa GN=B0403H10-OSIGBa0105A11.13 PE=4 SV=1 - [Q01HT5_ORYSA]	62.73	6	catalytic activity; transporter activity	cytoplasm; membrane; vacuole	transport	Pf03179	0.907812	7.78114	0.916235	8.22666	0.889395	11.9606	1.04649	12.8335	1.07213	11.1706	1.0137	10.1731	12.2974	8.49951
Q7EZD7	Os07g0106200 protein OS=Oryza sativa subsp. japonica GN=P0617C02.124-1 PE=2 SV=1 - [Q7EZD7_ORYSJ]	11.2	4	transporter activity	cytoplasm; membrane; nucleus; vacuole	response to stimulus; transport	Pf00083; Pf07690	0.955382	13.5057	0.84917	13.0976	0.903033	10.9004	0.983868	10.64	1.08024	11.8875	0.983553	13.4227	56.7279	9.31982
B9FR59	Putative uncharacterized protein OS=Oryza sativa subsp. japonica GN=OsJ_19875 PE=4 SV=1 - [B9FR59_ORYSJ]	15.22	21	catalytic activity	membrane	metabolic process	Pf02364	0.969916	12.1034	0.942743	17.5663	0.946385	19.5238	1.01697	9.16965	1.04375	8.69366	1.01486	11.2064	208.731	8.67529
Q6Z9F9	Os08g0440100 protein OS=Oryza sativa subsp. japonica GN=P0528B09.3 PE=2 SV=1 - [Q6Z9F9_ORYSJ]	54.75	10	transporter activity	cytoplasm; endoplasmic reticulum; membrane; mitochondrion; vacuole	response to stimulus; transport	Pf00061; Pf08212	0.978145	10.8114	1.01758	17.2504	0.969014	12.2207	1.02318	11.6377	1.02893	12.2656	1.01606	11.8884	20.5733	6.55127
Q6YY17	Os02g0586400 protein OS=Oryza sativa subsp. japonica GN=OSJNBb0056I22.32 PE=2 SV=1 - [Q6YY17_ORYSJ]	47.62	3	nucleotide binding	cytoplasm; membrane; vacuole	cell communication; regulation of biological process; response to stimulus; transport	Pf00025; Pf00071; Pf08477	0.912133	8.39727	0.867399	5.00558	0.907569	12.0049	1.01828	7.27293	1.07303	6.27922	0.959534	6.95167	23.0024	7.41553
A2YQL4	Fructokinase-2 OS=Oryza sativa subsp. indica GN=FRK2 PE=1 SV=2 - [SCRK2_ORYSI]	47.62	13	catalytic activity; nucleotide binding		metabolic process	Pf00294	0.986577	7.89736	0.934383	11.3969	0.911611	11.6548	0.953699	10.7287	0.99956	13.301	0.890686	12.4306	35.494	5.17334
Q7FAH2	Glyceraldehyde-3-phosphate dehydrogenase 2, cytosolic OS=Oryza sativa subsp. japonica GN=GAPC2 PE=1 SV=1 - [G3PC2_ORYSJ]	46.29	5	catalytic activity; metal ion binding; nucleotide binding	cytoplasm; extracellular; membrane; mitochondrion; nucleus; organelle lumen	defense response; development; metabolic process; reproduction; response to stimulus	Pf00044; Pf01113; Pf02800	0.960434	4.71619	0.973131	9.78308	0.947183	16.2635	0.942279	8.74934	0.934908	9.41573	0.923697	10.6581	36.7499	6.81494
Q5VS79	Calmodulin-binding protein-like OS=Oryza sativa subsp. japonica GN=P0644B06.3-1 PE=4 SV=1 - [Q5VS79_ORYSJ]	27.49	12	protein binding				0.922146	9.95215	0.882898	9.48315	0.897874	10.1515	1.04236	10.2708	1.07737	10.6815	1.04447	9.6395	47.7866	8.73389
Q0J8A4	Glyceraldehyde-3-phosphate dehydrogenase 1, cytosolic OS=Oryza sativa subsp. japonica GN=GAPC1 PE=1 SV=1 - [G3PC1_ORYSJ]	35.91	4	catalytic activity; nucleotide binding	cytoplasm	metabolic process	Pf00044; Pf01113; Pf02800; Pf02826	1.03514	9.03499	1.10718	12.1713	1.0312	12.9983	0.980749	9.71039	0.971475	10.2176	0.938428	9.30835	36.3898	7.10791
Q8H8C7	Chitin elicitor-binding protein OS=Oryza sativa subsp. japonica GN=CEBIP PE=1 SV=1 - [CEBIP_ORYSJ]	23.03	5		cytoplasm; membrane	defense response; metabolic process; response to stimulus	Pf01476	1.01234	8.33338	1.00011	8.7453	1.01221	12.0691	0.996438	10.1007	1.00204	10.532	1.00485	10.7539	37.1763	7.35693
B9FR61	Putative uncharacterized protein OS=Oryza sativa subsp. japonica GN=OsJ_19881 PE=4 SV=1 - [B9FR61_ORYSJ]	12.31	7		membrane			0.982224	8.38093	1.11139	22.7171	0.985527	16.1279	1.03112	10.2187	0.999333	10.8189	1.03711	13.0835	62.7168	9.23193
Q6I633	Putative syntaxin 71 (SYP71) OS=Oryza sativa subsp. japonica GN=OJ1263_E10.4 PE=4 SV=1 - [Q6I633_ORYSJ]	41.77	11	protein binding	cytoplasm; endoplasmic reticulum; membrane	transport	Pf05739	0.918893	9.56223	0.86344	15.5747	0.865193	14.9672	0.983141	11.531	1.00946	13.0069	0.957728	12.6499	35.2776	5.08447
Q6Z7B0	Dnak-type molecular chaperone Bip OS=Oryza sativa subsp. japonica GN=P0036E06.29 PE=2 SV=1 - [Q6Z7B0_ORYSJ]	33.98	18	catalytic activity; nucleotide binding	cytoplasm; membrane; nucleus; organelle lumen; vacuole	cell differentiation; cell organization and biogenesis; development; response to stimulus	Pf00012; Pf01968; Pf06723	0.969073	9.04259	0.990299	15.0283	0.985009	13.6306	1.01897	8.73573	1.04344	10.5945	1.0164	11.6799	73.3449	5.18604
Q6H450	Annexin OS=Oryza sativa subsp. japonica GN=B1339H09.19 PE=2 SV=1 - [Q6H450_ORYSJ]	34.92	10	metal ion binding			Pf00191	1.01416	10.6914	1.08721	12.5884	1.04351	14.0087	1.04322	13.994	0.992543	11.2335	0.990954	14.3051	35.6433	8.79248
Q7XEQ3	40S ribosomal protein S17-4, putative, expressed OS=Oryza sativa subsp. japonica GN=Os10g0411800 PE=1 SV=1 - [Q7XEQ3_ORYSJ]	34.04	4	structural molecule activity	cytoplasm; cytosol; membrane; nucleus; organelle lumen; ribosome	cell organization and biogenesis; metabolic process	Pf00833	0.959692	7.73472	0.935481	14.1131	0.913916	10.3488	1.0239	8.60717	1.01872	9.95218	0.995722	6.60474	16.4187	10.1401
Q9SDK4	GTP-binding protein OS=Oryza sativa subsp. japonica GN=P0705D01.9 PE=2 SV=1 - [Q9SDK4_ORYSJ]	46.11	2	nucleotide binding; transporter activity	cytoplasm; cytosol; endoplasmic reticulum; Golgi; membrane	cell communication; regulation of biological process; response to stimulus; transport	Pf00025	1.00315	8.9718	0.973994	16.0403	0.966598	7.82706	1.03522	10.3723	1.05159	4.51861	1.00993	8.13577	21.9304	6.80029
Q60EJ3	'putative 1,4-benzoquinone reductase' OS=Oryza sativa subsp. japonica GN=OSJNBa0017K09.5 PE=2 SV=1 - [Q60EJ3_ORYSJ]	40	2	catalytic activity; nucleotide binding	cytoplasm; membrane; vacuole	metabolic process; regulation of biological process; response to stimulus	Pf00258; Pf02525; Pf03358	1.19834	8.84376	1.2103	14.7018	1.10295	9.9436	0.994792	25.6243	0.97383	19.3963	1.05351	10.1415	21.6158	6.80029
A2ZLM3	Putative uncharacterized protein OS=Oryza sativa subsp. indica GN=OsI_38721 PE=3 SV=1 - [A2ZLM3_ORYSI]	39.9	2	nucleotide binding	cytoplasm; cytosol; endoplasmic reticulum; Golgi; membrane	transport	Pf00025	1.04099	6.44468	0.925265	8.25535	0.877215	6.17614	1.00977	5.43814	1.07351	11.2628	0.922818	1.56256	21.9874	7.47412
Q9AS12	Class III peroxidase 16 OS=Oryza sativa subsp. japonica GN=P0537A05.22 PE=3 SV=1 - [Q9AS12_ORYSJ]	20.23	5	antioxidant activity; catalytic activity; metal ion binding	cytoplasm	metabolic process; response to stimulus	Pf00141	0.926062	7.96605	0.851082	12.4826	0.883151	10.1702	0.928608	9.22628	0.960849	8.54822	0.884539	10.5336	37.1867	6.16357
Q7XIE2	Putative syntaxin-related protein OS=Oryza sativa subsp. japonica GN=P0039H02.103 PE=2 SV=1 - [Q7XIE2_ORYSJ]	42.9	13	protein binding; structural molecule activity	membrane	response to stimulus; transport	Pf00804; Pf00901; Pf05739	0.951643	9.69852	0.925359	13.4263	0.901307	13.2411	1.00036	10.7922	1.0221	10.4194	0.97891	12.6162	34.2289	7.94287
Q7XMK5	OSJNBb0039L24.13 protein OS=Oryza sativa subsp. japonica GN=OSJNBb0039L24.13 PE=2 SV=1 - [Q7XMK5_ORYSJ]	67.48	14		cytoplasm; membrane; vacuole		Pf03763; Pf03766	0.998653	12.1034	1.07205	19.0944	0.972702	16.6535	1.07953	14.3755	1.02088	11.9382	0.973623	11.5989	22.4017	5.50342
Q2QNF3	60S ribosomal protein L2, putative, expressed OS=Oryza sativa subsp. japonica GN=LOC_Os12g38000 PE=1 SV=1 - [Q2QNF3_ORYSJ]	29.5	6	RNA binding; structural molecule activity	cytoplasm; cytosol; membrane; nucleus; organelle lumen; ribosome; vacuole	metabolic process	Pf00181; Pf03947	1.07641	15.7488	1.21762	19.5751	1.04327	16.2284	1.12519	12.4406	1.04759	11.2434	1.03443	11.6945	28.2319	10.9897
B9FMV0	Malic enzyme OS=Oryza sativa subsp. japonica GN=OsJ_17383 PE=3 SV=1 - [B9FMV0_ORYSJ]	12.1	3	catalytic activity; metal ion binding; nucleotide binding	membrane	metabolic process	Pf00390; Pf03949	1.20676	10.4157	1.32198	21.8322	1.38601	28.3273	0.837363	21.6323	0.837978	5.91461	0.972095	38.4473	58.6871	5.97314
Q75HK2	Protease inhibitor/seed storage/LTP family protein OS=Oryza sativa subsp. japonica GN=OSJNBb0015I02.3 PE=2 SV=1 - [Q75HK2_ORYSJ]	33.85	5	catalytic activity	cytoplasm	metabolic process; transport	Pf00234	0.90731	9.43279	0.876629	16.3348	0.87915	8.83652	1.0591	7.08542	1.08715	9.77429	1.03351	8.76133	19.783	8.47021
P49398	40S ribosomal protein S4 OS=Oryza sativa subsp. japonica GN=RPS4 PE=2 SV=3 - [RS4_ORYSJ]	36.23	7	RNA binding; structural molecule activity	cytoplasm; cytosol; membrane; nucleus; organelle lumen; ribosome	metabolic process	Pf00900; Pf01479; Pf08071	0.914068	10.0386	0.853503	14.3668	0.886165	14.4094	1.05002	8.1343	1.03883	11.4453	0.999764	11.2979	29.8462	10.1255
P43279	NADP-dependent malic enzyme, chloroplastic OS=Oryza sativa subsp. japonica GN=ME6 PE=2 SV=2 - [MAOC_ORYSJ]	6.57	1	catalytic activity; metal ion binding; nucleotide binding; protein binding	cytoplasm; cytosol; extracellular; membrane	cell organization and biogenesis; metabolic process; response to stimulus	Pf00390; Pf03949	0.933254	7.80122	0.869462	3.23477	0.988155	0.0433062	0.913951	14.389	0.972916	13.0302	0.854793	4.26102	69.8219	7.13721
B9EYZ4	Putative uncharacterized protein OS=Oryza sativa subsp. japonica GN=OsJ_03116 PE=3 SV=1 - [B9EYZ4_ORYSJ]	19.67	15	catalytic activity; nucleotide binding; transporter activity	membrane	metabolic process; transport	Pf00005; Pf00664	0.953524	7.05825	0.944336	11.0812	0.91829	16.1764	1.04067	8.81183	1.01832	9.90111	1.02477	12.4444	136.705	8.82178
P41095	60S acidic ribosomal protein P0 OS=Oryza sativa subsp. japonica GN=Os08g0130500 PE=1 SV=3 - [RLA0_ORYSJ]	23.82	7	metal ion binding; structural molecule activity	cytoplasm; cytosol; membrane; nucleus; organelle lumen; ribosome	metabolic process; response to stimulus	Pf00428; Pf00466	0.915198	9.15556	0.821589	13.3481	0.809456	11.4844	0.981634	10.0297	1.00498	8.89727	0.960035	9.6529	34.3561	5.49072
Q9FTN5	Os01g0106400 protein OS=Oryza sativa subsp. japonica GN=P0005A05.19 PE=2 SV=1 - [Q9FTN5_ORYSJ]	12.1	2	catalytic activity; nucleotide binding	membrane	metabolic process; response to stimulus	Pf01073; Pf01370; Pf05368; Pf08659	1.06715	12.5409	1.06765	10.1287	1.08627	14.3932	0.914376	11.8412	0.927493	13.4696	0.869958	14.8633	33.4807	6.04932
B9FWE4	Putative uncharacterized protein OS=Oryza sativa subsp. japonica GN=OsJ_23697 PE=3 SV=1 - [B9FWE4_ORYSJ]	40.46	15	metal ion binding; protein binding	cytoplasm; endoplasmic reticulum; membrane; mitochondrion; vacuole	metabolic process; response to stimulus	Pf00262	0.967163	9.10509	0.876237	12.0814	0.901463	12.5187	1.02233	8.13847	1.05832	8.00463	0.967762	7.91236	44.6553	4.61475
Q8LI99	Os07g0645000 protein OS=Oryza sativa subsp. japonica GN=OJ1458_B07.124 PE=2 SV=1 - [Q8LI99_ORYSJ]	11.34	2		cytoplasm; membrane			0.926712	11.1087	0.883806	8.93427	0.887959	10.4885	1.08965	8.70986	1.0817	10.8107	1.03321	11.2017	20.7213	5.42725
A2ZVI7	cDNA, clone: J100088L22, full insert sequence OS=Oryza sativa subsp. japonica GN=OsJ_02652 PE=2 SV=1 - [A2ZVI7_ORYSJ]	21.24	4	catalytic activity; metal ion binding; nucleotide binding	cytoplasm; membrane; vacuole	cell communication; metabolic process; regulation of biological process; response to stimulus; transport	Pf00036; Pf00069; Pf07714	0.972366	7.97424	0.994019	10.0174	1.02381	11.0518	1.04899	8.96108	1.03307	7.18129	1.0493	5.69027	58.7027	6.50732
Q8RU33	Probable V-type proton ATPase subunit d OS=Oryza sativa subsp. japonica GN=Os01g0587000 PE=2 SV=1 - [VA0D_ORYSJ]	20.8	6	transporter activity	cytoplasm; membrane; vacuole	transport	Pf01992	0.907813	6.91987	0.854319	11.5841	0.847611	8.62422	0.980666	8.24686	1.02696	8.95272	0.982155	11.6152	40.7579	4.91943
Q0PVB1	Alpha-tubulin OS=Oryza sativa subsp. japonica GN=TubA PE=2 SV=1 - [Q0PVB1_ORYSJ]	41.69	1	catalytic activity; nucleotide binding; structural molecule activity	cytoplasm; cytoskeleton	cell organization and biogenesis; cellular component movement; metabolic process	Pf00091; Pf03953	0.830176		0.892207		1.41885		1.39397		1.80689		1.72975		49.7053	4.95752
Q5KQL4	Putative ribosomal protein S19 OS=Oryza sativa subsp. japonica GN=Os03g31130 PE=4 SV=1 - [Q5KQL4_ORYSJ]	52.08	8	structural molecule activity	cytoplasm; cytosol; membrane; nucleus; organelle lumen; ribosome; vacuole	metabolic process	Pf01090	0.904272	8.37857	0.879738	11.8444	0.852411	10.8108	1.02867	8.60484	1.06534	9.50099	0.997429	8.97272	16.1635	9.93506
Q0JAI2	OSJNba0093F12.16 protein OS=Oryza sativa subsp. japonica GN=OSJNba0093F12.16 PE=1 SV=1 - [Q0JAI2_ORYSJ]	45.18	6	structural molecule activity	cytoplasm; ribosome	metabolic process	Pf00298; Pf03946	0.957566	13.3452	0.904655	14.7819	0.902461	14.5594	1.01666	8.02617	1.02846	8.24002	0.995317	10.2953	17.7366	9.15869
A3AV21	Putative uncharacterized protein OS=Oryza sativa subsp. japonica GN=OsJ_15259 PE=4 SV=1 - [A3AV21_ORYSJ]	23.25	12	catalytic activity; nucleotide binding; protein binding	cytoplasm; membrane; nucleus	metabolic process	Pf00069; Pf07714	0.963966	8.5106	0.87745	12.173	0.912178	14.0955	1.00655	10.7705	1.02225	12.6402	0.974769	11.5361	62.439	7.45947
B9FLM2	Putative uncharacterized protein OS=Oryza sativa subsp. japonica GN=OsJ_19552 PE=4 SV=1 - [B9FLM2_ORYSJ]	16.23	2					0.898114	12.4427	0.822572	15.2879	0.832467	17.2068	1.08294	12.3431	1.09719	9.54971	1.02637	10.028	23.3116	9.80322
P51823	ADP-ribosylation factor 2 OS=Oryza sativa subsp. japonica GN=ARF PE=2 SV=2 - [ARF2_ORYSJ]	39.23	6	metal ion binding; nucleotide binding; signal transducer activity; transporter activity	cytoplasm; Golgi; membrane; nucleus; vacuole	cell communication; metabolic process; regulation of biological process; response to stimulus; transport	Pf00025; Pf00071; Pf00503; Pf04670; Pf08477; Pf09439	0.965754	11.2842	0.929933	19.6049	0.898849	13.7565	0.981356	8.77958	0.972168	9.18601	0.916932	8.79885	20.6947	6.94678
Q6ZLB8	Putative 60S ribosomal protein L4/L1 OS=Oryza sativa subsp. japonica GN=OJ1014_E09.28 PE=1 SV=1 - [Q6ZLB8_ORYSJ]	36.54	6	structural molecule activity	cytoplasm; cytosol; membrane; nucleus; organelle lumen; ribosome; vacuole	metabolic process	Pf00573	0.913087	6.78012	0.890604	8.76525	0.909777	8.50767	1.02399	11.9998	1.01904	6.28711	1.0063	5.29954	44.7112	10.5356
Q336V9	Protein kinase family protein, putative, expressed OS=Oryza sativa subsp. japonica GN=OSJNBb0015I11.13 PE=4 SV=2 - [Q336V9_ORYSJ]	24.14	7	catalytic activity; nucleotide binding; protein binding	cytoplasm	metabolic process	Pf00069; Pf07714	0.944425	10.0232	1.00218	15.8133	0.938307	9.98832	1.00882	10.018	0.992922	8.16886	0.977907	13.7064	58.1401	7.79639
Q7XQN5	OSJNBa0089K21.1 protein OS=Oryza sativa subsp. japonica GN=OSJNBa0089K21.1 PE=2 SV=2 - [Q7XQN5_ORYSJ]	35.07	1	nucleotide binding	cytoplasm; membrane; vacuole	cell communication; regulation of biological process; response to stimulus; transport	Pf00025; Pf00071; Pf08477	0.857714		0.786715		0.826255		1.05454		1.09215		1.11031		23.0695	7.44482
Q7XJX6	OSJNBa0033G05.3 protein OS=Oryza sativa subsp. japonica GN=OSJNBa0063C18.17 PE=2 SV=2 - [Q7XJX6_ORYSJ]	42.75	10	catalytic activity; transporter activity	cytoplasm; membrane; vacuole	transport	Pf01813	0.980716	8.99309	0.955955	11.218	0.946238	10.3561	1.01019	9.55739	1.03686	9.0717	1.01069	10.2917	29.1626	9.80322
A2Z2G1	Putative uncharacterized protein OS=Oryza sativa subsp. indica GN=OsI_31797 PE=3 SV=1 - [A2Z2G1_ORYSI]	34.05	4	nucleotide binding; protein binding	cytoplasm; cytosol; extracellular; membrane; mitochondrion; nucleus; organelle lumen	defense response; development; metabolic process; regulation of biological process; reproduction; response to stimulus	Pf00183; Pf02518	0.984674	6.57614	0.928546	11.8741	0.913929	8.04823	0.939053	6.7932	0.978009	7.88305	0.925756	5.60092	80.1637	5.05908
A2ZN20	Putative uncharacterized protein OS=Oryza sativa subsp. indica GN=OsI_39235 PE=4 SV=1 - [A2ZN20_ORYSI]	45.96	3	DNA binding; nucleotide binding	cytoplasm; membrane; nucleus; organelle lumen	defense response; development; metabolic process; regulation of biological process; reproduction; response to stimulus; transport	Pf00076	0.979542	32.4236	1.06966	19.1523	0.968191	25.842	0.884539	21.6708	1.05104	23.4926	0.866728	27.5523	16.0623	6.7417
Q6ZKI0	Os08g0139200 protein OS=Oryza sativa subsp. japonica GN=OJ1119_D01.19 PE=2 SV=1 - [Q6ZKI0_ORYSJ]	56.16	7	catalytic activity; nucleotide binding	cytoplasm; membrane; vacuole	metabolic process; regulation of biological process; response to stimulus	Pf00258; Pf02525; Pf03358	0.958676	9.35115	1.01949	13.8523	0.95401	11.7724	0.994265	9.67897	0.996597	10.3614	0.997577	8.46919	21.5758	6.53662
Q653H4	Os06g0686400 protein OS=Oryza sativa subsp. japonica GN=P0623A10.9-1 PE=2 SV=1 - [Q653H4_ORYSJ]	10.4	1		cytoplasm	transport		0.926357	10.6469	0.848066	11.1821	0.86701	10.7731	0.998504	8.4935	1.01667	9.38004	0.950168	9.92173	12.9383	7.50342
Q7Y1I5	Os03g0796501 protein OS=Oryza sativa subsp. japonica GN=OSJNBa0094F01.24 PE=4 SV=1 - [Q7Y1I5_ORYSJ]	24.01	2	structural molecule activity	cytoplasm; cytosol; membrane; nucleus; organelle lumen; ribosome; vacuole	metabolic process	Pf00573	0.945551	3.0505	0.9114	3.64174	0.912308	6.91278	1.02562	0.391907	1.05345	5.24552	1.04418	3.91486	44.461	10.5503
Q67G20	Actin OS=Oryza sativa subsp. japonica GN=Act PE=2 SV=1 - [Q67G20_ORYSJ]	43.77	1	nucleotide binding	cytoplasm; cytoskeleton		Pf00022	1.0957	9.95686	1.34707	0.295581	1.16036	5.50117	1.08545	4.81138	0.924574	4.18346	0.97855	7.15325	41.5959	5.49072
A2XLF2	Actin-1 OS=Oryza sativa subsp. indica GN=ACT1 PE=2 SV=1 - [ACT1_ORYSI]	43.77	2	nucleotide binding	cytoplasm; cytoskeleton; membrane; mitochondrion		Pf00022	0.944255	10.8949	0.953036	33.657	0.950641	29.7991	0.971773	13.3934	0.90455	15.9973	0.951766	13.2079	41.7859	5.49072
B9FAH6	Putative uncharacterized protein OS=Oryza sativa subsp. japonica GN=OsJ_09196 PE=4 SV=1 - [B9FAH6_ORYSJ]	11.4	11	catalytic activity	cytoplasm; membrane; mitochondrion	metabolic process	Pf02364	0.914098	10.1776	0.852416	10.4575	0.852295	17.7174	0.971206	13.3116	1.05894	8.11547	0.940912	11.2273	184.428	7.23975
Q10DN0	Tubulin alpha-1 chain, putative, expressed OS=Oryza sativa subsp. japonica GN=LOC_Os03g51600 PE=2 SV=1 - [Q10DN0_ORYSJ]	37.26	1	catalytic activity; nucleotide binding; structural molecule activity	cytoplasm; cytoskeleton	cell organization and biogenesis; cellular component movement; metabolic process	Pf00091; Pf03953	0.926836		0.825956		0.81076		0.858964		1.00497		1.05333		45.9635	5.03369
A2WU37	Putative uncharacterized protein OS=Oryza sativa subsp. indica GN=OsI_03383 PE=3 SV=1 - [A2WU37_ORYSI]	14.76	8	catalytic activity; nucleotide binding; transporter activity	membrane	metabolic process; transport	Pf00005; Pf00664; Pf09818	0.976783	8.83084	0.948232	17.2525	0.965403	20.5431	1.13305	17.0808	1.0533	13.6657	1.1183	27.3784	137.544	7.54736
P35681	Translationally-controlled tumor protein homolog OS=Oryza sativa subsp. japonica GN=TCTP PE=1 SV=1 - [TCTP_ORYSJ]	32.74	6		cytoplasm; extracellular; membrane; nucleus	cell differentiation; cell growth; cell organization and biogenesis; cell proliferation; defense response; development; regulation of biological process; reproduction; response to stimulus	Pf00838	1.05014	6.7995	1.00558	8.91812	0.985406	10.037	0.943031	9.94875	0.956425	9.49114	0.927902	11.1131	18.9345	4.67822
B8AWG8	Putative uncharacterized protein OS=Oryza sativa subsp. indica GN=OsI_20926 PE=3 SV=1 - [B8AWG8_ORYSI]	36.62	20	catalytic activity; nucleotide binding; protein binding	cytoplasm; cytoskeleton; membrane; vacuole	cell communication; cell differentiation; cell division; cell organization and biogenesis; development; metabolic process; reproduction; transport	Pf00350; Pf01031; Pf02212	0.970448	11.8999	0.981905	15.2282	0.948141	13.2206	1.02785	10.4848	1.02181	11.4238	1.01881	11.2176	68.6409	7.78174
Q65XH8	Os05g0106600 protein OS=Oryza sativa subsp. japonica GN=OSJNBb0035J08.15 PE=2 SV=1 - [Q65XH8_ORYSJ]	45.62	1	nucleotide binding	cytoplasm; cytoskeleton		Pf00022	1.62102	5.43566	1.69046	17.818	1.35635	0.460298	1.30043	7.23182	0.892662	7.86235	0.940112	10.6916	41.6689	5.40186
A6N1G6	Ribulose bisphosphate carboxylase small chain (Fragment) OS=Oryza sativa subsp. indica PE=2 SV=1 - [A6N1G6_ORYSI]	65.05	9	catalytic activity; metal ion binding	cytoplasm; cytosol; extracellular; membrane; ribosome	metabolic process; response to stimulus	Pf00101	0.89942	8.25701	0.837995	10.6559	0.832927	12.5932	1.02351	7.04372	1.04965	7.75959	0.990183	8.50783	12.0251	8.26514
Q93VT8	ATP-citrate synthase beta chain protein 1 OS=Oryza sativa subsp. japonica GN=ACLB-1 PE=2 SV=1 - [ACLB1_ORYSJ]	35.2	17	catalytic activity; metal ion binding; nucleotide binding	cytoplasm; cytosol; membrane	metabolic process	Pf00285; Pf00549	1.00481	9.29871	0.916746	11.8994	0.943886	10.1796	0.944628	10.6704	0.966224	9.34985	0.931328	9.0808	66.028	7.6792
Q6H6C7	Phosphoglycerate kinase OS=Oryza sativa subsp. japonica GN=P0669G09.19 PE=2 SV=1 - [Q6H6C7_ORYSJ]	40.3	12	catalytic activity	cytoplasm; extracellular; membrane; nucleus	metabolic process	Pf00162	1.01395	8.8182	0.97972	11.2944	0.942386	10.5134	0.905345	10.2695	0.945505	8.06725	0.897897	12.2714	42.0815	5.85889
A6MZN1	60S acidic ribosomal protein p2b (Fragment) OS=Oryza sativa subsp. indica PE=2 SV=1 - [A6MZN1_ORYSI]	61.11	3	structural molecule activity	cytoplasm; ribosome	metabolic process	Pf00428	0.991827	6.76559	0.946981	8.71806	1.0529	13.1194	1.03818	8.83519	1.09498	11.0021	1.05197	10.0873	9.27756	4.25928
Q10FE5	Retrotransposon protein, putative, Ty1-copia subclass, expressed OS=Oryza sativa subsp. japonica GN=LOC_Os03g46770 PE=4 SV=1 - [Q10FE5_ORYSJ]	33.99	2	DNA binding; nucleotide binding	cytoplasm; membrane; nucleus; organelle lumen	defense response; development; metabolic process; regulation of biological process; reproduction; response to stimulus; transport	Pf00076	1.00995	25.937	1.01895	23.7126	1.02157	15.6823	0.898392	11.8239	0.914915	31.5676	1.05453	40.1091	15.1739	5.60498
Q6K5G8	Glyceraldehyde-3-phosphate dehydrogenase 3, cytosolic OS=Oryza sativa subsp. japonica GN=GAPC3 PE=2 SV=1 - [G3PC3_ORYSJ]	27.3	2	catalytic activity; metal ion binding; nucleotide binding	cytoplasm; extracellular; membrane; mitochondrion; nucleus; organelle lumen	defense response; development; metabolic process; reproduction; response to stimulus	Pf00044; Pf01113; Pf02800	0.943847	5.24957	0.837195	5.35902	0.859624	6.08004	0.943335	8.2705	1.00434	6.53884	0.946727	5.99692	36.5449	7.88428
O80384	Ovp1 OS=Oryza sativa GN=OVP1 PE=3 SV=1 - [O80384_ORYSA]	19.71	5	catalytic activity; metal ion binding; transporter activity	cytoplasm; membrane	transport	Pf03030	0.949549	15.3962	0.959907	13.4193	0.942887	22.6139	1.09417	18.1886	1.10545	14.9735	1.09442	13.5346	80.5837	5.33838
Q6H883	Putative inorganic diphosphatase OS=Oryza sativa subsp. japonica GN=OJ1572_F02.11 PE=3 SV=1 - [Q6H883_ORYSJ]	19.22	4	catalytic activity; metal ion binding; transporter activity	cytoplasm; membrane	transport	Pf03030	0.914371	15.433	0.905105	17.3715	0.925654	10.4056	1.02267	10.0493	1.08889	9.48781	1.07181	12.5691	80.1277	5.47803
Q851R5	Thioredoxin H2-2 OS=Oryza sativa subsp. japonica GN=Os03g0800700 PE=2 SV=1 - [TRH22_ORYSJ]	27.61	4	catalytic activity	cytoplasm	cellular homeostasis; metabolic process; regulation of biological process; transport	Pf00085	0.93037	9.0286	0.916776	11.1911	0.932176	12.9026	1.03271	11.9027	1.09306	13.2041	0.999639	8.52222	14.7863	5.97314
Q6WSC2	Glutathione S-transferase OS=Oryza sativa subsp. indica GN=gstu4 PE=2 SV=1 - [Q6WSC2_ORYSI]	14.16	2	catalytic activity; protein binding	cytoplasm	development; response to stimulus	Pf00043; Pf02798	1.01835	8.80574	0.964457	6.42355	1.01109	10.317	0.902196	9.53969	0.953692	8.32436	0.909023	10.5107	25.316	5.99854
P17784	Fructose-bisphosphate aldolase cytoplasmic isozyme OS=Oryza sativa subsp. japonica GN=FBA PE=1 SV=2 - [ALF_ORYSJ]	32.96	3	catalytic activity; metal ion binding	cytoplasm; cytosol; extracellular; membrane; mitochondrion; nucleus; organelle lumen	metabolic process; response to stimulus	Pf00274	1.11357	13.4693	1.00959	47.4551	1.00555	34.1631	1.00523	37.1849	0.924325	25.8351	0.922524	21.2167	38.8391	7.32764
Q945W2	Glutathione S-transferase GSTU6, putative, expressed OS=Oryza sativa subsp. japonica GN=OSJNBb0038A07.8 PE=2 SV=1 - [Q945W2_ORYSJ]	34.98	7	catalytic activity; protein binding	cytoplasm	development; response to stimulus	Pf00043; Pf02798	1.02429	9.07675	0.90509	7.24513	0.941093	9.85449	0.89735	10.7352	0.914236	7.87301	0.900731	11.2535	26.4747	5.94775
E0X6V4	Triosephosphate isomerase OS=Oryza sativa subsp. japonica PE=2 SV=1 - [E0X6V4_ORYSJ]	43.08	8	catalytic activity; metal ion binding	cytoplasm; extracellular; membrane; mitochondrion; vacuole	metabolic process; response to stimulus	Pf00121	1.03529	14.8677	1.10153	21.0783	1.00721	15.9744	0.972091	16.3811	0.961338	14.7129	0.97392	14.9315	27.03	5.49072
Q7XE16	Cell division cycle protein 48, putative, expressed OS=Oryza sativa subsp. japonica GN=LOC_Os10g30580 PE=3 SV=2 - [Q7XE16_ORYSJ]	33.79	3	catalytic activity; nucleotide binding; protein binding; RNA binding	cytoplasm; cytoskeleton; cytosol; membrane; nucleus; organelle lumen; ribosome	cell differentiation; cell division; cell growth; cell organization and biogenesis; development; metabolic process; reproduction; response to stimulus	Pf00004; Pf00910; Pf01057; Pf01078; Pf02359; Pf02933; Pf05496; Pf06068; Pf07724; Pf07728	1.00931	17.1404	0.974643	12.8866	0.972813	9.364	0.988989	13.7773	1.15488	12.1897	0.999998	14.9612	89.7549	5.21143
Q0JFH7	Os04g0102700 protein OS=Oryza sativa subsp. japonica GN=Os04g0102700 PE=4 SV=1 - [Q0JFH7_ORYSJ]	17.27	9	catalytic activity	cytoplasm; endoplasmic reticulum; membrane; vacuole	defense response; response to stimulus	Pf01425	1.01141	15.3657	0.969949	16.9598	0.965982	16.1839	1.01444	11.6775	1.01783	10.8509	0.990118	9.98419	66.5049	6.65381
Q69JZ2	Os09g0535900 protein OS=Oryza sativa subsp. japonica GN=P0569E11.10 PE=2 SV=1 - [Q69JZ2_ORYSJ]	29.67	9	catalytic activity	cytoplasm	cell communication; metabolic process; regulation of biological process; response to stimulus	Pf00388	1.01344	9.66193	1.07598	15.4354	0.996894	12.1378	0.970484	13.289	0.953805	11.1623	0.965521	15.3575	37.4782	6.94678
P0C542	Actin-7 OS=Oryza sativa subsp. indica GN=ACT7 PE=3 SV=1 - [ACT7_ORYSI]	33.78	5	nucleotide binding	cytoplasm; cytoskeleton		Pf00022	1.13471	7.68114	1.07399	12.8355	1.02113	11.6012	0.876192	13.9671	0.825876	7.74781	0.830574	13.1711	41.5878	5.38916
A2YWQ1	Heat shock protein 81-1 OS=Oryza sativa subsp. indica GN=HSP81-1 PE=2 SV=1 - [HSP81_ORYSI]	34.05	4	nucleotide binding; protein binding	cytoplasm; cytosol; extracellular; membrane; mitochondrion; nucleus; organelle lumen	defense response; development; metabolic process; regulation of biological process; reproduction; response to stimulus	Pf00183; Pf02518	0.986535	4.15802	0.988834	10.8248	0.920314	3.1274	0.932525	5.55347	0.955093	6.67714	0.948493	6.17357	80.1438	5.07178
B8AZZ6	Putative uncharacterized protein OS=Oryza sativa subsp. indica GN=OsI_20631 PE=3 SV=1 - [B8AZZ6_ORYSI]	53.4	4	nucleotide binding	cytoplasm; membrane; nucleus	cell communication; regulation of biological process; response to stimulus; transport	Pf00025; Pf00071; Pf04670; Pf08477	0.91408	12.6987	0.838174	11.3321	0.87525	10.4575	1.0467	7.03343	1.07121	8.03267	1.01137	7.15845	23.0114	5.50342
Q5N725	Fructose-bisphosphate aldolase OS=Oryza sativa subsp. japonica GN=B1417F08.1-1 PE=2 SV=1 - [Q5N725_ORYSJ]	33.8	3	catalytic activity; metal ion binding	cytoplasm; cytosol; extracellular; membrane; mitochondrion; nucleus; organelle lumen	metabolic process; response to stimulus	Pf00274	1.0545	7.06185	0.979443	17.5083	1.04556	29.3582	0.972104	24.3111	0.871395	28.2416	0.918396	20.5521	38.7992	8.1626
A2Z7B3	GDP-mannose 3,5-epimerase 1 OS=Oryza sativa subsp. indica GN=OsI_032456 PE=2 SV=1 - [GME1_ORYSI]	28.04	6	catalytic activity; nucleotide binding		metabolic process	Pf01073; Pf01370; Pf02719; Pf07993	1.09139	9.8228	1.23637	13.2046	1.03069	11.7735	1.04821	14.6845	0.967095	14.4998	1.01087	12.9166	42.7809	6.0874
Q8H616	Os06g0178900 protein OS=Oryza sativa subsp. japonica GN=OSJNBa0035I03.12 PE=2 SV=1 - [Q8H616_ORYSJ]	12.91	2	catalytic activity; metal ion binding; transporter activity	cytoplasm; membrane	transport	Pf03030	1.07931	43.1564	1.18552	88.6588	1.01328	63.4106	1.13974	17.9735	1.03819	8.15416	1.12388	11.2135	79.9935	5.78271
A2XNF0	Chalcone--flavonone isomerase OS=Oryza sativa subsp. indica GN=CHI PE=2 SV=1 - [CFI_ORYSI]	50.21	8	catalytic activity		metabolic process	Pf02431	1.08829	7.75208	1.07404	8.58183	1.04584	9.63046	0.91024	10.8924	0.906699	11.5064	0.91447	10.8242	23.8782	5.2749
A3QQQ3	UDP-glucose pyrophosphorylase OS=Oryza sativa subsp. indica GN=UGP PE=2 SV=1 - [A3QQQ3_ORYSI]	30.49	13	catalytic activity	membrane	cell communication; cell organization and biogenesis; development; metabolic process; response to stimulus	Pf01704	1.02139	8.17507	0.951368	9.9158	0.968947	11.0551	0.936946	7.97934	0.947376	10.4667	0.93041	8.35594	51.6202	5.59229
Q10K23	Jacalin-like lectin domain containing protein, expressed OS=Oryza sativa subsp. japonica GN=LOC_Os03g28160 PE=2 SV=1 - [Q10K23_ORYSJ]	30.11	5				Pf01419	1.08901	14.0565	1.00491	13.878	1.01297	13.8185	0.83598	16.985	0.879531	14.7032	0.841924	12.1088	18.2602	5.85889
P35683	Eukaryotic initiation factor 4A-1 OS=Oryza sativa subsp. japonica GN=Os06g0701100 PE=2 SV=2 - [IF4A1_ORYSJ]	23.43	8	catalytic activity; nucleotide binding; RNA binding	cytoplasm; cytosol; membrane; nucleus; organelle lumen	metabolic process; response to stimulus	Pf00270; Pf00271	1.00637	10.3952	0.991138	15.7771	1.02865	20.8047	0.996086	12.7829	0.987029	12.3862	0.96121	11.7605	47.058	5.56689
A2ZS26	Putative uncharacterized protein OS=Oryza sativa subsp. japonica GN=OsJ_01389 PE=3 SV=1 - [A2ZS26_ORYSJ]	11.28	8	catalytic activity; nucleotide binding; transporter activity	cytoplasm; membrane	cell communication; cell differentiation; cell growth; development; metabolic process; regulation of biological process; response to stimulus; transport	Pf00005; Pf00664	0.960394	4.0427	0.916084	4.33292	0.974711	10.4526	1.03967	5.68549	0.997187	7.49044	1.01972	9.12887	131.279	8.25049
Q69UI8	Os08g0116500 protein OS=Oryza sativa subsp. japonica GN=P0470F10.11 PE=4 SV=1 - [Q69UI8_ORYSJ]	10	1	structural molecule activity	cytoplasm; cytosol; membrane; nucleus; ribosome	metabolic process	Pf00428	0.933342	14.2122	0.812347	15.3259	0.789124	19.8038	0.96589	12.9262	1.0032	9.59101	0.942487	11.7738	11.0756	4.51318
P0C539	Actin-2 OS=Oryza sativa subsp. indica GN=ACT2 PE=3 SV=1 - [ACT2_ORYSI]	43.77	1	nucleotide binding	cytoplasm; cytoskeleton		Pf00022	1.14956	13.1685	1.3233	23.0143	1.28991	14.1733	1.06899	14.0599	0.975821	3.07129	1.0665	3.35198	41.653	5.49072
Q6K4T1	60S ribosomal protein L27 OS=Oryza sativa subsp. japonica GN=OSJNBa0018M09.22 PE=2 SV=1 - [Q6K4T1_ORYSJ]	23.36	1	structural molecule activity	cytoplasm; cytosol; membrane; mitochondrion; ribosome	metabolic process	Pf01777	1.04555	14.9245	1.05667	23.9147	1.06943	18.7297	1.16152	16.8709	1.12136	2.19734	1.14099	5.64323	15.5687	10.4917
Q0D840	Thioredoxin H1 OS=Oryza sativa subsp. japonica GN=TRXH PE=1 SV=1 - [TRXH1_ORYSJ]	57.38	7	catalytic activity; enzyme regulator activity	cytoplasm	cellular homeostasis; metabolic process; regulation of biological process; response to stimulus; transport	Pf00085; Pf06110	0.972028	7.63938	0.911018	10.9089	0.929794	13.2572	0.952475	8.39204	0.972242	8.59597	0.920608	9.8785	13.1477	5.30029
Q7EZL2	Putative P-glycoprotein 1 OS=Oryza sativa subsp. japonica GN=P0705A05.112-2 PE=3 SV=1 - [Q7EZL2_ORYSJ]	18.68	18	catalytic activity; nucleotide binding; transporter activity	membrane	metabolic process; transport	Pf00005; Pf00664; Pf02463	0.963446	15.8478	1.04018	20.9592	0.986009	19.4081	1.07786	8.6736	1.06164	9.03793	1.07817	13.5169	145.105	8.47021
H2KX19	Alpha-dioxygenase, putative, expressed OS=Oryza sativa subsp. japonica GN=LOC_Os12g26290 PE=4 SV=1 - [H2KX19_ORYSJ]	38.8	20	antioxidant activity; catalytic activity		metabolic process; response to stimulus	Pf03098	0.913641	11.2953	0.899654	12.7692	0.917245	18.4165	1.07171	10.0186	1.07922	10.1715	1.05434	9.32938	68.1297	6.7417
Q10P27	40S ribosomal protein S20, putative, expressed OS=Oryza sativa subsp. japonica GN=Os03g0249400 PE=2 SV=1 - [Q10P27_ORYSJ]	35.43	2	structural molecule activity	cytoplasm; cytosol; membrane; nucleus; organelle lumen; ribosome	metabolic process	Pf00338	0.981493	9.77838	0.946386	12.1594	0.964807	12.244	1.04281	12.0019	1.11022	10.0155	1.01125	11.1294	13.9496	9.46631
Q0D9K5	Os06g0711900 protein OS=Oryza sativa subsp. japonica GN=Os06g0711900 PE=2 SV=1 - [Q0D9K5_ORYSJ]	18.63	2		cytoplasm	transport	Pf00234	0.812553	14.4829	0.782238	15.4531	0.808	11.5417	1.32176	15.8139	1.40316	18.4027	1.29545	16.3084	15.6519	8.60205
A2YMS7	Putative uncharacterized protein OS=Oryza sativa subsp. indica GN=OsI_26532 PE=4 SV=1 - [A2YMS7_ORYSI]	30.55	12	catalytic activity; metal ion binding; nucleotide binding	cytoplasm; membrane; nucleus	cell communication; metabolic process; regulation of biological process; response to stimulus	Pf00036; Pf00069; Pf07714	0.966095	7.95859	0.935976	10.4824	0.905048	13.3622	0.982725	8.3746	1.04977	9.56508	0.981989	10.5232	62.3598	7.40088
Q75LR5	40S ribosomal protein S6 OS=Oryza sativa subsp. japonica GN=OSJNBa0017N12.10 PE=2 SV=1 - [Q75LR5_ORYSJ]	30.2	9	structural molecule activity	cytoplasm; cytosol; membrane; nucleus; organelle lumen; ribosome	metabolic process	Pf01092	0.952839	13.0725	0.875138	22.4463	0.869405	14.5616	0.980258	7.98996	1.02212	10.0864	0.946573	10.5627	28.0413	10.6382
Q8RU48	Cell elongation protein DIMINUTO, putative, expressed OS=Oryza sativa subsp. japonica GN=OSJNBb0058B20.18 PE=4 SV=1 - [Q8RU48_ORYSJ]	23.17	13	catalytic activity; protein binding	cytoplasm; membrane; vacuole	cell growth; cell organization and biogenesis; metabolic process; response to stimulus	Pf01565	0.923036	12.2993	0.923389	17.6795	0.911987	17.6739	1.07514	9.74155	1.06097	9.55403	1.0213	9.27849	64.8912	8.22119
Q10P12	Os03g0251500 protein OS=Oryza sativa subsp. japonica GN=Os03g0251500 PE=2 SV=1 - [Q10P12_ORYSJ]	16.46	9	catalytic activity; transporter activity	cytoplasm; membrane; mitochondrion; vacuole	cell communication; response to stimulus; transport	Pf01496	0.944228	11.168	0.871248	13.9293	0.924456	17.9633	0.998826	9.38557	1.04058	11.6991	1.04018	11.4172	92.3132	6.22705
A2XNS1	Actin-3 OS=Oryza sativa subsp. indica GN=ACT3 PE=2 SV=2 - [ACT3_ORYSI]	31.56	2	nucleotide binding	cytoplasm; cytoskeleton		Pf00022	0.885832	10.2694	1.23706	55.8482	1.14656	42.7695	1.08901	24.7076	0.785808	21.4287	0.979586	8.85181	41.679	5.49072
Q7X8H4	Putative receptor-like protein kinase 4 OS=Oryza sativa subsp. japonica GN=P0011H09.108 PE=4 SV=1 - [Q7X8H4_ORYSJ]	38.66	20	catalytic activity; nucleotide binding	cytoplasm; membrane	metabolic process	Pf00069; Pf01657; Pf07714	1.03159	10.5282	1.00177	12.8157	0.989163	17.7022	0.909417	13.2029	0.942179	13.5978	0.907617	13.295	72.9337	6.94678
A2ZID5	Putative uncharacterized protein OS=Oryza sativa subsp. indica GN=OsI_37581 PE=3 SV=1 - [A2ZID5_ORYSI]	43.16	2	nucleotide binding	cytoplasm; cytoskeleton		Pf00022	1.144	11.5887	1.20038	17.1217	1.0871	21.4644	1.05016	9.58659	0.906149	3.13825	0.99482	14.2605	41.689	5.59229
Q10QU8	40S ribosomal protein SA, putative, expressed OS=Oryza sativa subsp. japonica GN=LOC_Os03g08440 PE=3 SV=1 - [Q10QU8_ORYSJ]	24.16	6	structural molecule activity	cytoplasm; cytosol; membrane; nucleus; ribosome	cell organization and biogenesis; metabolic process; response to stimulus	Pf00318	1.01661	9.75476	1.05627	11.8089	1.00577	13.8925	1.02158	9.50654	1.02519	9.3909	1.01363	7.85645	29.838	5.47803
Q8H588	Putative ribosomal protein S18 OS=Oryza sativa subsp. japonica GN=OJ1656_E11.108 PE=3 SV=1 - [Q8H588_ORYSJ]	37.84	6	RNA binding; structural molecule activity	cytoplasm; cytosol; membrane; nucleus; organelle lumen; ribosome; vacuole	metabolic process	Pf00416	0.95819	6.9585	0.885696	10.375	0.881119	13.2176	0.972133	9.01843	1.0288	9.27462	0.969677	9.33502	17.2813	10.7407
B9FW14	Putative uncharacterized protein OS=Oryza sativa subsp. japonica GN=OsJ_23458 PE=4 SV=1 - [B9FW14_ORYSJ]	23.23	3		membrane	transport	Pf00234	0.944008	5.8429	0.912463	18.4226	0.923307	21.5308	0.995263	12.6042	1.02114	15.2558	0.97132	14.0849	20.0132	7.88428
Q6Z9G0	Glyceraldehyde-3-phosphate dehydrogenase OS=Oryza sativa subsp. japonica GN=P0528B09.18 PE=2 SV=1 - [Q6Z9G0_ORYSJ]	32.46	15	catalytic activity		metabolic process	Pf00171	1.0432	7.67327	1.02736	9.85026	0.982786	11.7567	0.918708	10.9159	0.945519	9.24428	0.921557	9.98116	53.3356	7.00537
Q8H6H4	Inorganic phosphate transporter 1-1 OS=Oryza sativa subsp. japonica GN=PHT1-1 PE=2 SV=1 - [PHT11_ORYSJ]	18.22	6	transporter activity	cytoplasm; membrane; nucleus; vacuole	cell communication; response to stimulus; transport	Pf00083; Pf07690	0.975012	8.88463	0.97771	10.7857	0.994488	8.98271	0.955011	10.801	0.953169	8.62691	0.969016	8.09058	57.4202	8.36768
K4FHN8	Disulfide isomerase OS=Oryza sativa subsp. japonica PE=2 SV=1 - [K4FHN8_ORYSJ]	35.81	16				Protein not found	0.934524	8.09879	0.885496	12.9957	0.863206	10.286	1.00329	8.14487	1.04286	7.65594	0.984322	7.91627	56.89	5.09717
Q10L56	Glutathione peroxidase OS=Oryza sativa subsp. japonica GN=Os03g0358100 PE=3 SV=1 - [Q10L56_ORYSJ]	54.44	8	antioxidant activity; catalytic activity	membrane	development; metabolic process; reproduction; response to stimulus	Pf00255; Pf00578; Pf08534	1.03126	12.2385	1.07577	18.671	0.97581	13.3534	0.999002	12.6754	0.983763	13.5799	0.972598	11.2135	19.2219	8.60205
Q2QNV2	Fiber protein Fb19, putative, expressed OS=Oryza sativa subsp. japonica GN=LOC_Os12g36640 PE=2 SV=1 - [Q2QNV2_ORYSJ]	13.61	2			response to stimulus	Pf00582	1.01759	5.1821	1.09828	7.05176	1.03925	7.78869	1.00566	6.44445	0.973034	7.23079	0.993972	6.69056	18.0891	6.99072
Q6ZFM7	Putative sorbitol transporter OS=Oryza sativa subsp. japonica GN=OJ1301_C12.23 PE=3 SV=1 - [Q6ZFM7_ORYSJ]	18.63	8	transporter activity	membrane	transport	Pf00083; Pf07690	1.17594	10.5063	1.1194	11.636	1.16856	11.2423	0.785719	13.3075	0.779095	16.0533	0.797515	22.2935	54.3819	9.23193
Q8H6G8	Probable inorganic phosphate transporter 1-8 OS=Oryza sativa subsp. japonica GN=PHT1-8 PE=2 SV=1 - [PHT18_ORYSJ]	15.71	7	transporter activity	cytoplasm; membrane; nucleus; vacuole	cell communication; response to stimulus; transport	Pf00083; Pf07690	1.07196	7.23656	1.02388	11.4854	1.04926	9.79491	0.847552	10.262	0.875865	7.65199	0.876226	9.99151	59.0741	8.51416
A2Y3W4	Putative uncharacterized protein OS=Oryza sativa subsp. indica GN=OsI_19685 PE=4 SV=1 - [A2Y3W4_ORYSI]	20.07	2	RNA binding; structural molecule activity	cytoplasm; cytosol; membrane; nucleus; organelle lumen; ribosome	metabolic process	Pf00900; Pf08071	0.997714	11.9475	0.939385	2.43204	1.07975	23.1848	1.15261	17.4165	1.10373	8.81549	1.18563	18.7987	31.707	10.0815
Q75J18	60S ribosomal protein L13a-2, putative, expressed OS=Oryza sativa subsp. japonica GN=OSJNBb0081K01.9 PE=2 SV=1 - [Q75J18_ORYSJ]	43.2	8	structural molecule activity	cytoplasm; ribosome	metabolic process	Pf00572	0.95266	9.5726	0.889406	12.9294	0.94393	10.5829	1.00452	10.2264	1.03702	8.87931	1.01751	8.28537	23.601	10.3013
Q84QW4	Os08g0524400 protein OS=Oryza sativa subsp. japonica GN=OJ1191_A10.104 PE=4 SV=1 - [Q84QW4_ORYSJ]	15.59	3		cytoplasm		Pf04526	0.912217	9.7524	0.890896	10.0472	0.865496	9.04592	1.05571	10.4954	1.07544	6.50874	1.04023	7.53074	25.3411	9.15869
Q75LD0	Os03g0844100 protein OS=Oryza sativa subsp. japonica GN=OSJNBa0032G11.13 PE=2 SV=1 - [Q75LD0_ORYSJ]	30.98	7	catalytic activity; nucleotide binding	membrane	metabolic process	Pf00069; Pf07714	0.930378	6.23368	0.897404	9.07197	0.890559	16.9009	0.981793	8.71635	1.04032	8.43967	0.980769	11.7929	40.7497	6.60986
Q0D9G9	Os06g0716700 protein OS=Oryza sativa subsp. japonica GN=Os06g0716700 PE=3 SV=1 - [Q0D9G9_ORYSJ]	26.17	22	nucleotide binding; protein binding	cytoplasm; membrane; mitochondrion; nucleus; vacuole	development; metabolic process; regulation of biological process; response to stimulus; transport	Pf00183; Pf02518	0.956218	11.0657	0.93812	18.7591	0.944259	18.6251	1.01961	8.2758	1.01367	8.9212	0.984725	6.92799	92.7612	4.98291
B8B2H8	Putative uncharacterized protein OS=Oryza sativa subsp. indica GN=OsI_24450 PE=4 SV=1 - [B8B2H8_ORYSI]	29.05	11	catalytic activity; metal ion binding; nucleotide binding	membrane	metabolic process	Pf00069; Pf06293; Pf07714	0.990439	10.7467	0.983056	11.639	0.963089	10.1069	0.996212	8.49282	1.01061	8.06282	1.00152	8.14807	69.0988	9.05615
Q2QX08	Dirigent-like protein, expressed OS=Oryza sativa subsp. japonica GN=LOC_Os12g07580 PE=4 SV=1 - [Q2QX08_ORYSJ]	38.04	6		cytoplasm		Pf03018	1.03526	8.49677	1.00222	11.4063	1.03146	12.1323	0.95342	7.93346	0.969181	9.31714	0.971817	9.63333	19.2658	9.12939
P52428	Proteasome subunit alpha type-1 OS=Oryza sativa subsp. japonica GN=PAF1 PE=2 SV=1 - [PSA1_ORYSJ]	30.37	6	catalytic activity	cytoplasm; membrane; nucleus; proteasome	metabolic process; response to stimulus	Pf00227; Pf10584	1.05145	6.70064	1.12706	8.0951	1.10748	10.4838	1.00178	10.2339	0.957186	8.26928	1.01145	8.70661	29.6117	5.5415
Q6J2K5	Respiratory burst oxidase homolog protein B OS=Oryza sativa subsp. indica GN=RBOHB PE=2 SV=1 - [RBOHB_ORYSI]	21.55	17	antioxidant activity; catalytic activity; metal ion binding	membrane	development; metabolic process; response to stimulus	Pf01794; Pf08022; Pf08030; Pf08414	0.981806	12.5432	0.968363	17.672	0.956246	16.0923	1.03179	13.3615	1.02296	12.9211	0.989523	10.5178	101.694	9.27588
B8ABA7	Putative uncharacterized protein OS=Oryza sativa subsp. indica GN=OsI_04213 PE=4 SV=1 - [B8ABA7_ORYSI]	22.72	6	catalytic activity; metal ion binding	cytoplasm; cytosol; extracellular; membrane; mitochondrion	metabolic process; response to stimulus	Pf01676; Pf06415	1.01911	7.11587	0.952171	11.3206	0.958817	9.61459	0.899906	9.90292	0.925536	8.33665	0.879779	8.90898	60.7239	5.60498
Q10M12	Expressed protein OS=Oryza sativa subsp. japonica GN=Os03g0327600 PE=2 SV=1 - [Q10M12_ORYSJ]	58.91	15					0.952676	14.8705	1.11105	28.4311	0.963289	18.5296	1.1219	11.5036	1.05364	11.537	1.10712	11.772	38.7978	6.80029
Q6AVV6	Nitrate transporter, putative OS=Oryza sativa subsp. japonica GN=OSJNBb0024N19.9 PE=2 SV=1 - [Q6AVV6_ORYSJ]	16.01	8	transporter activity	membrane	transport	Pf00854	0.912101	8.48872	0.902644	11.6662	0.944172	10.6278	1.02403	8.40079	1.11977	7.38976	1.06852	6.78387	63.5219	8.89502
B9F8Y4	Putative uncharacterized protein OS=Oryza sativa subsp. japonica GN=OsJ_11214 PE=4 SV=1 - [B9F8Y4_ORYSJ]	17.27	11	protein binding			Pf00092	0.922663	10.62	0.894162	14.477	0.902705	15.6191	1.00876	11.0347	1.01869	9.37639	0.979696	9.1755	79.0263	5.8335
Q7X8A1	OSJNBa0036B21.24 protein OS=Oryza sativa subsp. japonica GN=OSJNBa0036B21.24 PE=2 SV=1 - [Q7X8A1_ORYSJ]	29.35	7	catalytic activity; nucleotide binding	cytoplasm; extracellular; membrane	metabolic process; response to stimulus	Pf00044; Pf02800	0.969063	8.09902	0.923882	10.408	0.939746	8.64489	0.992524	8.20022	1.03621	7.97757	0.990964	8.59224	42.6891	7.72314
A3ADQ4	Putative uncharacterized protein OS=Oryza sativa subsp. japonica GN=OsJ_09260 PE=4 SV=1 - [A3ADQ4_ORYSJ]	23.47	8		cytoplasm		Pf02469	0.828599	10.774	0.780173	10.2823	0.810033	7.69137	1.07909	12.2567	1.10475	12.8822	1.0722	11.6092	40.3634	9.94971
A2ZN77	Sucrose transport protein SUT2 OS=Oryza sativa subsp. indica GN=SUT2 PE=2 SV=2 - [SUT2_ORYSI]	7.78	3	transporter activity	cytoplasm; membrane; vacuole	metabolic process; transport		1.1497	25.0697	1.31256	34.364	1.27778	48.6797	1.01979	15.0275	1.0337	8.08061	1.06486	14.4773	53.147	8.89502
A2Y650	Phosphoglycerate kinase OS=Oryza sativa subsp. indica GN=OsI_20474 PE=3 SV=1 - [A2Y650_ORYSI]	42.61	6	catalytic activity	cytoplasm; extracellular; membrane; mitochondrion; nucleus	metabolic process; response to stimulus	Pf00162	0.978694	8.86737	0.867777	11.6698	0.896728	11.4058	0.990821	7.01892	1.02576	7.96863	0.975546	12.1168	30.4635	7.41553
B8BH17	Putative uncharacterized protein OS=Oryza sativa subsp. indica GN=OsI_33738 PE=4 SV=1 - [B8BH17_ORYSI]	39.2	9	catalytic activity; nucleotide binding	membrane	metabolic process; regulation of biological process	Pf02525; Pf03358	1.06851	9.70952	1.11119	16.0721	1.03112	11.5456	1.05164	9.90535	0.99012	7.33638	0.984403	9.4532	25.9331	8.88037
Q6L4R5	Os05g0593100 protein OS=Oryza sativa subsp. japonica GN=P0663C08.13 PE=2 SV=1 - [Q6L4R5_ORYSJ]	25.73	10	catalytic activity; transporter activity	cytoplasm; membrane; vacuole	cell growth; cell organization and biogenesis; metabolic process; regulation of biological process; transport	Pf03223	0.993478	6.48083	0.955551	10.3368	0.935439	10.1169	0.996269	6.05294	1.04716	8.79595	0.986852	5.8061	42.6517	5.64307
Q9LWT6	Os06g0114000 protein OS=Oryza sativa subsp. japonica GN=P0541H01.20 PE=2 SV=1 - [Q9LWT6_ORYSJ]	14.31	8	nucleotide binding; protein binding	cytoplasm; cytosol; extracellular; membrane; mitochondrion; nucleus; organelle lumen; ribosome	cell death; defense response; metabolic process; response to stimulus	Pf00118	0.86507	7.26222	0.817395	11.8639	0.81357	11.1841	1.06289	7.08773	1.10271	8.29181	1.01633	7.17558	64.0459	5.66846
Q6H563	Os02g0521300 protein OS=Oryza sativa subsp. japonica GN=OSJNBa0047A17.6 PE=2 SV=1 - [Q6H563_ORYSJ]	16.95	9	protein binding	membrane	cell death; cell organization and biogenesis; regulation of biological process; response to stimulus	Pf00168; Pf07002	0.986156	12.5754	0.991874	15.9308	0.993129	15.0441	1.00521	11.3265	0.966602	7.79269	0.973382	8.80949	63.7901	5.41455
Q7XC31	60S ribosomal protein L27 OS=Oryza sativa subsp. japonica GN=Os10g0564300 PE=1 SV=1 - [Q7XC31_ORYSJ]	22.79	1	structural molecule activity	cytoplasm; cytosol; membrane; mitochondrion; ribosome	metabolic process	Pf01777	0.830095		0.820363		0.85105		1.22472		1.31728		1.24727		15.4617	10.5503
B8B7B6	40S ribosomal protein S12 OS=Oryza sativa subsp. indica GN=OsI_24909 PE=3 SV=1 - [B8B7B6_ORYSI]	59.42	1	structural molecule activity	cytoplasm; cytosol; nucleus; ribosome	metabolic process; response to stimulus	Pf01248	0.997897	3.57388	0.900221	2.06356	0.929697	4.75368	1.02469	6.43936	1.06891	7.96905	0.977254	13.0727	14.8035	5.51611
Q9ZRI7	Elongation factor 1-gamma 1 OS=Oryza sativa subsp. japonica GN=Os02g0220600 PE=2 SV=1 - [EF1G1_ORYSJ]	19.38	4	metal ion binding; protein binding; RNA binding	cytoplasm; membrane; vacuole	metabolic process; response to stimulus	Pf00043; Pf00647; Pf02798	0.966434	5.66654	0.918258	7.51399	0.900246	9.13059	0.901771	4.50608	0.946033	5.91109	0.890195	6.90433	47.448	6.46826
B9F4C1	Putative uncharacterized protein OS=Oryza sativa subsp. japonica GN=OsJ_05929 PE=4 SV=1 - [B9F4C1_ORYSJ]	9.54	3	metal ion binding	extracellular; membrane	cell communication; regulation of biological process; response to stimulus	Pf10591	0.962861	14.7625	0.994019	16.5608	0.978831	12.6454	0.969658	12.7307	0.967916	13.1891	0.981605	12.584	61.4835	5.14795
Q7XV86	OSJNBb0012E08.10 protein OS=Oryza sativa subsp. japonica GN=OSJNBb0012E08.10 PE=2 SV=1 - [Q7XV86_ORYSJ]	17.32	8	metal ion binding; protein binding	cytoplasm; endoplasmic reticulum; membrane; mitochondrion; vacuole	metabolic process	Pf00262	0.950041	10.1757	0.84205	16.3618	0.831016	16.4667	1.0385	13.6252	1.03845	15.2357	0.996895	12.3702	60.6917	4.83057
Q84ZC0	Probable V-type proton ATPase subunit H OS=Oryza sativa subsp. japonica GN=Os07g0549700 PE=2 SV=1 - [VATH_ORYSJ]	24.56	10	catalytic activity; protein binding; transporter activity	cytoplasm; membrane; vacuole	transport	Pf03224; Pf11698	0.964393	11.734	0.953813	9.99826	0.930007	15.7241	0.981421	8.70507	1.03957	9.3168	0.987281	10.1871	51.3568	7.41553
B8AU76	Putative uncharacterized protein OS=Oryza sativa subsp. indica GN=OsI_17411 PE=4 SV=1 - [B8AU76_ORYSI]	9.43	1	catalytic activity; nucleotide binding	cytoplasm; membrane; mitochondrion	metabolic process	Pf00069; Pf07714; Pf11721; Pf12819	0.974041		0.896274		0.963894		0.936412		0.951902		0.965952		211.765	7.28369
Q8H2J8	40S ribosomal protein S12 OS=Oryza sativa subsp. japonica GN=OSJNBa0016A21.128-2 PE=2 SV=1 - [Q8H2J8_ORYSJ]	59.42	1	structural molecule activity	cytoplasm; cytosol; nucleus; ribosome	metabolic process; response to stimulus	Pf01248	1.03457		0.939172		0.875404		1.0983		1.07922		1.15063		14.7695	5.51611
Q8H8T0	UDP-arabinopyranose mutase 1 OS=Oryza sativa subsp. japonica GN=UAM1 PE=1 SV=1 - [RGP1_ORYSJ]	24.73	9	catalytic activity; protein binding	cytoplasm; Golgi	cell organization and biogenesis; metabolic process	Pf03214	0.942649	5.89644	0.959242	10.2368	0.916703	7.90433	1.01211	8.05255	1.01935	5.01572	0.982868	7.24749	41.3216	6.18896
Q0DJB7	Os05g0304400 protein OS=Oryza sativa subsp. japonica GN=Os05g0304400 PE=2 SV=1 - [Q0DJB7_ORYSJ]	31.91	13	enzyme regulator activity		transport	Pf00996	0.953739	7.05858	0.863133	9.09295	0.885278	9.0547	0.967701	9.88224	0.991488	7.23902	0.942263	8.32633	49.6178	5.84619
P35684	60S ribosomal protein L3 OS=Oryza sativa subsp. japonica GN=RPL3 PE=2 SV=2 - [RL3_ORYSJ]	32.9	14	structural molecule activity	cytoplasm; cytosol; membrane; nucleus; organelle lumen; ribosome; vacuole	metabolic process	Pf00297	0.958133	7.04229	0.958682	14.2366	0.928213	11.868	1.02961	6.81436	1.01021	6.6601	0.985487	9.65048	44.4357	10.0815
Q9ST27	Phototropin-2 OS=Oryza sativa subsp. japonica GN=PHOT2 PE=1 SV=1 - [PHOT2_ORYSJ]	23.59	17	catalytic activity; nucleotide binding; protein binding; receptor activity; signal transducer activity; structural molecule activity	cytoplasm; cytoskeleton; Golgi; membrane	cell communication; cellular component movement; metabolic process; regulation of biological process; response to stimulus; transport	Pf00069; Pf00989; Pf07714; Pf08447; Pf08448	1.00648	6.45178	0.958201	11.5231	0.963227	7.98762	0.972435	8.7681	0.970474	8.48206	0.932384	10.5787	100.161	7.69385
A2Y2C4	Putative uncharacterized protein OS=Oryza sativa subsp. indica GN=OsI_19156 PE=3 SV=1 - [A2Y2C4_ORYSI]	26.6	6	catalytic activity	cytoplasm	metabolic process	Pf00704	0.984645	15.292	0.936898	13.4225	0.977421	11.6387	0.975205	12.1012	1.02886	9.80904	0.969	11.5795	32.5145	6.30322
Q337E7	Remorin, C-terminal region family protein, expressed OS=Oryza sativa subsp. japonica GN=LOC_Os10g36000 PE=2 SV=2 - [Q337E7_ORYSJ]	51.13	6					0.977191	10.7865	0.947372	10.9237	0.959304	13.4316	1.01956	8.71089	1.03656	8.63948	0.988732	9.3823	14.2572	5.09717
P28752	Tubulin alpha-1 chain OS=Oryza sativa subsp. japonica GN=TUBA1 PE=1 SV=1 - [TBA1_ORYSJ]	30.89	1	catalytic activity; nucleotide binding; structural molecule activity	cytoplasm; cytoskeleton; cytosol; membrane	cell organization and biogenesis; cellular component movement; metabolic process; response to stimulus	Pf00091; Pf03953													49.6225	5.05908
Q0JDZ7	40S ribosomal protein S8 OS=Oryza sativa subsp. japonica GN=OSJNBa0038P21.4 PE=2 SV=1 - [Q0JDZ7_ORYSJ]	37.1	3	structural molecule activity	cytoplasm; cytosol; ribosome	metabolic process	Pf01201	1.17968	34.3644	1.22471	46.434	0.991479	43.5682	1.14922	10.2361	1.05577	15.3909	1.01381	5.59514	24.9133	10.4038
B9FDE0	Putative uncharacterized protein OS=Oryza sativa subsp. japonica GN=OsJ_16683 PE=4 SV=1 - [B9FDE0_ORYSJ]	19.84	8	catalytic activity; nucleotide binding; protein binding		metabolic process	Pf00069; Pf07714	0.952906	9.71031	0.905081	9.07556	0.952952	15.2049	0.959783	9.94978	1.02334	10.0283	0.971555	9.91618	55.3762	6.04932
B8A8N0	Putative uncharacterized protein OS=Oryza sativa subsp. indica GN=OsI_02106 PE=3 SV=1 - [B8A8N0_ORYSI]	22.36	1	catalytic activity; metal ion binding	membrane	metabolic process	Pf00205; Pf02552; Pf02775; Pf02776	1.23788	0.377667	1.21896	0.82817	1.31689	9.17508	0.828118	5.26244	0.796228	3.4928	0.854689	12.8375	60.7294	6.354
B7E5F1	Carbonic anhydrase OS=Oryza sativa subsp. japonica PE=2 SV=1 - [B7E5F1_ORYSJ]	36.63	6	catalytic activity; metal ion binding	membrane		Pf00484	0.945471	6.47187	0.916102	10.9282	0.906767	9.46741	0.966284	6.86392	0.975307	6.20957	0.923058	9.85553	22.1473	6.66846
A3A0I1	Putative uncharacterized protein OS=Oryza sativa subsp. japonica GN=OsJ_04401 PE=3 SV=1 - [A3A0I1_ORYSJ]	26.58	1	RNA binding; structural molecule activity	cytoplasm; cytosol; membrane; nucleus; organelle lumen; ribosome; vacuole	cell proliferation; development; metabolic process	Pf00861	0.898792	11.744	0.976634	4.36587	0.934969	11.2509	1.07929	11.5371	1.04711	2.13663	1.01968	2.754	34.3055	9.08545
Q6YW62	Putative PDR-like ABC transporter OS=Oryza sativa subsp. japonica GN=B1090H08.39 PE=4 SV=1 - [Q6YW62_ORYSJ]	7.72	4	catalytic activity; nucleotide binding	membrane	metabolic process	Pf00005; Pf01061; Pf08370	0.863159	8.9948	0.819123	10.3432	0.819541	23.429	1.05847	6.71539	1.06165	17.5721	0.986401	10.9596	166.619	7.84033
Q75LE2	Os03g0843100 protein OS=Oryza sativa subsp. japonica GN=OSJNBa0032G11.3 PE=2 SV=1 - [Q75LE2_ORYSJ]	37.67	5	nucleotide binding	cytoplasm; endosome; membrane	cell communication; cell division; regulation of biological process; response to stimulus; transport	Pf00025; Pf00071; Pf08477	0.983346	10.9009	0.899634	12.0328	0.938698	12.8468	0.972381	12.9337	1.05891	7.60708	1.02228	15.0728	24.4676	7.28369
Q7X8B5	OSJNBa0035M09.2 protein OS=Oryza sativa subsp. japonica GN=OSJNBa0035M09.2 PE=3 SV=2 - [Q7X8B5_ORYSJ]	20.5	18	catalytic activity; metal ion binding; nucleotide binding; protein binding; transporter activity	membrane	development; metabolic process; reproduction; response to stimulus; transport	Pf00122; Pf00689; Pf00690; Pf00702; Pf12515; Pf12710	1.00824	7.54031	0.982495	10.5144	1.02067	9.88455	0.941342	7.22979	0.949561	11.3268	0.947757	9.44971	117.588	7.35693
Q8H4Q9	GTP-binding protein Rab6 OS=Oryza sativa subsp. japonica GN=OJ1457_D07.114 PE=3 SV=1 - [Q8H4Q9_ORYSJ]	44.23	8	nucleotide binding; transporter activity	cytoplasm; membrane; nucleus	cell communication; regulation of biological process; response to stimulus; transport	Pf00025; Pf00071; Pf02421; Pf04670; Pf08477	0.869037	11.0098	0.814655	9.09706	0.776203	9.17415	1.01581	8.9332	1.02218	7.99504	0.931903	8.53966	22.9308	7.89893
Q5U1S3	Class III peroxidase 20 OS=Oryza sativa subsp. japonica GN=prx20 PE=3 SV=1 - [Q5U1S3_ORYSJ]	9.04	1	antioxidant activity; catalytic activity; metal ion binding	cytoplasm; membrane; vacuole	metabolic process; response to stimulus	Pf00141	0.953089	4.91764	1.00998	2.66244	0.856216	8.96387	0.986328	4.61787	0.985589	6.31247	0.906245	3.71675	38.4568	7.09326
B9EX46	Putative uncharacterized protein OS=Oryza sativa subsp. japonica GN=OsJ_01941 PE=3 SV=1 - [B9EX46_ORYSJ]	24.11	1	catalytic activity; metal ion binding	membrane	metabolic process	Pf00205; Pf02552; Pf02775; Pf02776	0.997633	1.12957	0.964606	3.55475	0.935013	1.93871	0.937643	8.60739	0.964845	10.9181	0.859888	12.2184	55.9039	6.354
A2XFC7	L-ascorbate peroxidase 1, cytosolic OS=Oryza sativa subsp. indica GN=APX1 PE=2 SV=1 - [APX1_ORYSI]	42.8	7	antioxidant activity; catalytic activity; metal ion binding	cytoplasm; membrane	development; metabolic process; reproduction; response to stimulus	Pf00141	0.997669	10.6616	0.950117	18.5243	0.964933	12.9928	0.896369	13.1498	0.906138	11.3846	0.879935	11.8969	27.0856	5.49072
Q01J03	B0806H07.1 protein OS=Oryza sativa GN=B0806H07.1 PE=4 SV=1 - [Q01J03_ORYSA]	14.86	8	catalytic activity; structural molecule activity	cytoplasm; extracellular; membrane	cell differentiation; cell growth; cell organization and biogenesis; development; metabolic process; reproduction	Pf03009; Pf04625	0.903099	15.1767	0.804701	10.3786	0.851729	18.1382	1.03109	7.47401	1.04503	12.0827	0.964685	6.96935	81.1056	6.0874
Q94DM2	Class III peroxidase 22 OS=Oryza sativa subsp. japonica GN=P0483G10.32 PE=2 SV=1 - [Q94DM2_ORYSJ]	5.62	1	antioxidant activity; catalytic activity; metal ion binding	cytoplasm; membrane; vacuole	metabolic process; response to stimulus	Pf00141	1.03393		0.911075		0.883176		0.996336		0.956528		0.990284		38.0231	5.23682
P93844	Phospholipase D alpha 2 OS=Oryza sativa subsp. japonica GN=PLD2 PE=2 SV=2 - [PLDA2_ORYSJ]	20.56	12	catalytic activity; metal ion binding; protein binding	membrane	metabolic process	Pf00614; Pf12357	1.06168	10.9901	1.18583	21.3156	1.08927	16.7575	0.973201	12.4869	0.95136	10.6219	0.995353	10.4261	91.2612	7.03467
Q10RP0	Cell division cycle protein 48, putative, expressed OS=Oryza sativa subsp. japonica GN=Os03g0151800 PE=2 SV=1 - [Q10RP0_ORYSJ]	31.89	3	catalytic activity; nucleotide binding; protein binding; RNA binding	cytoplasm; cytoskeleton; cytosol; membrane; nucleus; organelle lumen; ribosome	cell differentiation; cell division; cell growth; cell organization and biogenesis; development; metabolic process; reproduction; response to stimulus	Pf00004; Pf00910; Pf01057; Pf01078; Pf02359; Pf02933; Pf05496; Pf06068; Pf06414; Pf07724; Pf07728	1.13946	9.19808	1.11556	19.9353	1.06944	7.32653	1.00225	16.7465	0.846238	7.08968	0.938237	6.83504	89.6877	5.26221
Q9AYP4	40S ribosomal protein S10 OS=Oryza sativa subsp. japonica GN=RPS10 PE=2 SV=2 - [RS10_ORYSJ]	36.61	3		cytoplasm; cytosol; membrane; ribosome		Pf03501	0.980926	7.2959	0.962702	13.4614	0.96094	10.3972	1.01597	10.4093	0.97629	7.9499	0.973909	8.71999	20.2502	9.75928
A3BFA0	Peptidyl-prolyl cis-trans isomerase OS=Oryza sativa subsp. japonica GN=OsJ_22614 PE=3 SV=1 - [A3BFA0_ORYSJ]	39.22	7	catalytic activity	cytoplasm; cytosol; endoplasmic reticulum; endosome; Golgi; membrane	development; metabolic process	Pf00160	0.937558	6.84341	0.819745	13.5031	0.825169	11.1686	0.990952	9.10837	0.996968	9.57914	0.926268	11.5399	21.6612	9.26123
Q10HT1	40S ribosomal protein S3, putative, expressed OS=Oryza sativa subsp. japonica GN=LOC_Os03g38000 PE=3 SV=1 - [Q10HT1_ORYSJ]	61.46	12	RNA binding; structural molecule activity	cytoplasm; cytosol; membrane; nucleus; organelle lumen; ribosome; vacuole	metabolic process; response to stimulus	Pf00189; Pf07650	1.00197	12.0666	0.960866	14.17	0.9763	12.8717	1.02479	11.152	1.00874	10.9088	1.00655	8.86065	22.8043	9.53955
B7SDE4	60S ribosomal protein L5 OS=Oryza sativa subsp. japonica GN=OsJ_04400 PE=2 SV=1 - [B7SDE4_ORYSJ]	26.32	1	RNA binding; structural molecule activity	cytoplasm; cytosol; membrane; nucleus; organelle lumen; ribosome; vacuole	cell proliferation; development; metabolic process	Pf00861	0.903036	5.89457	0.852564	5.45266	0.881631	14.4352	1.04631	8.98743	1.09041	4.457	1.00678	4.05417	34.7157	9.1001
Q2QPR0	Phenylalanine ammonia-lyase OS=Oryza sativa subsp. japonica GN=LOC_Os12g33610 PE=3 SV=1 - [Q2QPR0_ORYSJ]	37.1	20	catalytic activity	cytoplasm	metabolic process	Pf00221	1.0319	12.7291	1.06993	15.264	1.02543	15.7519	0.971904	12.8903	0.941573	10.8745	0.953855	12.8947	74.5344	6.21436
Q9FE01	L-ascorbate peroxidase 2, cytosolic OS=Oryza sativa subsp. japonica GN=APX2 PE=1 SV=1 - [APX2_ORYSJ]	41.83	6	antioxidant activity; catalytic activity; metal ion binding	cytoplasm; membrane	development; metabolic process; reproduction; response to stimulus	Pf00141	1.08052	10.1016	1.11139	15.8945	1.12131	16.8081	0.880606	9.1021	0.85369	14.6633	0.870003	18.5048	27.1006	5.36377
B8BG04	Putative uncharacterized protein OS=Oryza sativa subsp. indica GN=OsI_32928 PE=4 SV=1 - [B8BG04_ORYSI]	20.88	11	catalytic activity; transporter activity	cytoplasm; membrane; mitochondrion; vacuole	cell communication; response to stimulus; transport	Pf01496	0.952536	13.7499	0.96478	15.8717	0.908335	16.1585	1.02478	8.02777	1.01163	11.5638	0.965252	10.5082	92.1802	5.93506
Q651M0	Os09g0525900 protein OS=Oryza sativa subsp. japonica GN=OSJNBa0047P18.34 PE=2 SV=1 - [Q651M0_ORYSJ]	21.05	6	catalytic activity	membrane	metabolic process	Pf01694	0.875461	11.9378	0.808618	13.6631	0.859548	21.013	1.05879	5.63925	1.03879	11.4403	1.01384	7.18361	35.5935	9.1001
Q84VG0	Probable calcium-binding protein CML7 OS=Oryza sativa subsp. japonica GN=CML7 PE=2 SV=1 - [CML7_ORYSJ]	64.19	9	metal ion binding	cytoplasm; membrane; nucleus	response to stimulus	Pf00036	0.951542	6.37767	0.931109	13.9105	0.961805	10.7481	1.02757	8.21981	1.04232	9.98712	1.03017	5.96287	16.6725	5.05908
B9F767	Putative uncharacterized protein OS=Oryza sativa subsp. japonica GN=OsJ_10236 PE=4 SV=1 - [B9F767_ORYSJ]	26.72	19	metal ion binding; protein binding	membrane			0.958708	7.95255	0.928848	9.39984	0.970561	15.0521	0.968869	10.5543	0.980813	8.25766	0.974706	8.5257	90.2577	6.41748
Q6K4K9	Os09g0249700 protein OS=Oryza sativa subsp. japonica GN=OJ1116_H10.3 PE=2 SV=1 - [Q6K4K9_ORYSJ]	21.98	11	enzyme regulator activity	membrane	cell communication; regulation of biological process; response to stimulus; transport		0.996774	7.18878	0.972254	10.9806	0.922875	11.6036	0.964854	12.7575	0.968709	11.06	0.928797	11.2284	65.6581	5.03369
A3BXL8	PDR20 OS=Oryza sativa subsp. japonica GN=OsJ_28928 PE=2 SV=1 - [A3BXL8_ORYSJ]	12.24	14	catalytic activity; nucleotide binding	membrane	metabolic process	Pf00005; Pf01061; Pf08370	0.93232	5.66577	0.898066	7.79251	0.930958	8.0727	1.00492	5.55748	1.00765	8.63286	1.00766	12.7248	162.661	7.02002
Q69LE4	Putative 3-glucanase OS=Oryza sativa subsp. japonica GN=OSJNBa0050F10.9 PE=2 SV=1 - [Q69LE4_ORYSJ]	26.72	10	catalytic activity	cytoplasm; membrane	metabolic process	Pf00332; Pf07983	0.988397	9.66573	1.00527	22.1963	0.948307	17.4682	1.01918	11.0536	1.02048	11.4923	1.00054	11.0832	51.2819	5.47803
Q5Z627	Elongation factor 1-gamma 3 OS=Oryza sativa subsp. japonica GN=Os06g0571400 PE=2 SV=1 - [EF1G3_ORYSJ]	24.76	5	metal ion binding; protein binding; RNA binding	cytoplasm; membrane; vacuole	metabolic process; response to stimulus	Pf00043; Pf00647; Pf02798	1.00037	10.7686	0.933639	17.2563	0.970811	12.9362	1.00532	9.19764	1.00868	7.32752	1.00608	8.72361	47.36	6.46826
P14717	Phenylalanine ammonia-lyase OS=Oryza sativa subsp. japonica GN=PAL PE=1 SV=2 - [PAL1_ORYSJ]	21.97	9	catalytic activity	cytoplasm	metabolic process	Pf00221	1.07263	7.16613	1.0653	15.2	1.05114	12.2086	0.861774	21.2316	0.882981	15.4172	0.858615	21.0258	75.4509	6.49365
Q9XEA6	Cysteine synthase OS=Oryza sativa subsp. japonica GN=RCS1 PE=2 SV=2 - [CYSK1_ORYSJ]	35.83	8	catalytic activity	cytoplasm; extracellular; membrane; nucleus	metabolic process; response to stimulus	Pf00291	1.05482	10.1085	1.02027	16.1655	0.970591	16.4214	0.923703	8.15614	0.974345	11.5479	0.937049	9.3522	33.8167	5.42725
B9F0T2	Putative uncharacterized protein OS=Oryza sativa subsp. japonica GN=OsJ_07321 PE=3 SV=1 - [B9F0T2_ORYSJ]	32.83	12	catalytic activity	membrane	metabolic process	Pf00201	1.04338	10.7833	1.05338	18.6009	1.00455	17.3593	0.933945	16.0926	0.980792	12.3202	0.924908	13.6349	42.7319	6.32861
Q0IXR7	Os03g0167100 protein OS=Oryza sativa subsp. japonica GN=Os10g0411700 PE=4 SV=1 - [Q0IXR7_ORYSJ]	40	3	structural molecule activity	cytoplasm; cytosol; membrane; ribosome	metabolic process; transport	Pf01200	0.981069	12.0729	0.978558	15.5414	1.05647	10.557	1.08405	13.5491	1.16559	16.168	1.11216	12.8119	7.45912	11.1655
Q5JN27	Os01g0960400 protein OS=Oryza sativa subsp. japonica GN=P0401G10.25-1 PE=2 SV=1 - [Q5JN27_ORYSJ]	12.39	7	catalytic activity; nucleotide binding	cytoplasm; membrane	metabolic process	Pf00069; Pf07714; Pf08263	0.967199	7.82182	0.958919	16.8755	0.953661	12.5581	0.977109	10.586	0.997644	14.1675	0.966994	12.898	105.036	6.65381
Q9ST82	CAA303715.1 protein OS=Oryza sativa GN=q3037.15 PE=3 SV=1 - [Q9ST82_ORYSA]	19.94	5	antioxidant activity; catalytic activity; metal ion binding	cytoplasm	metabolic process; response to stimulus	Pf00141	0.994283	13.4319	0.947004	19.106	1.00264	14.7154	0.986997	10.6901	1.01922	8.87652	0.972007	7.90652	34.82	7.88428
Q9SNK3	EST C74302(E30840) corresponds to a region of the predicted gene OS=Oryza sativa subsp. japonica GN=OJ1528D07.7 PE=3 SV=1 - [Q9SNK3_ORYSJ]	27.48	7	catalytic activity; nucleotide binding	cytoplasm; extracellular; membrane	metabolic process; response to stimulus	Pf00044; Pf02672; Pf02800	0.922669	5.04385	0.910469	7.26963	0.874927	6.72066	0.994402	4.37615	1.01656	6.29554	0.946636	5.73147	47.0813	6.68311
P49199	40S ribosomal protein S8 OS=Oryza sativa subsp. japonica GN=RPS8 PE=2 SV=2 - [RS8_ORYSJ]	36.82	2	structural molecule activity	cytoplasm; cytosol; ribosome	metabolic process	Pf01201	1.01931	10.7853	1.10395	15.3305	0.951642	4.96117	1.21383	3.6069	1.11027	14.8081	1.09672	8.27621	24.8142	10.4038
Q69L47	Os09g0308900 protein OS=Oryza sativa subsp. japonica GN=OSJNBa0092O08.28-1 PE=4 SV=1 - [Q69L47_ORYSJ]	7.82	2	catalytic activity	membrane	metabolic process	Pf01569	1.04834	11.3491	1.10815	6.33759	1.00684	8.56556	1.03422	6.78498	0.972735	7.55247	0.998886	8.82086	34.3557	8.04541
B8B8W3	Putative uncharacterized protein OS=Oryza sativa subsp. indica GN=OsI_29887 PE=3 SV=1 - [B8B8W3_ORYSI]	10.5	8	catalytic activity; metal ion binding; nucleotide binding; protein binding; transporter activity	membrane	metabolic process; transport	Pf00122; Pf00689; Pf00690; Pf00702; Pf12515; Pf12710	0.911666	7.18457	0.887076	15.8853	0.89254	18.2102	0.975872	13.0367	1.05176	10.7657	0.965447	10.8615	117.037	7.15186
Q6YY64	60S ribosomal protein L6 OS=Oryza sativa subsp. japonica GN=OSJNBa0006O15.44 PE=2 SV=1 - [Q6YY64_ORYSJ]	32.88	5	structural molecule activity	cytoplasm; cytosol; endoplasmic reticulum; membrane; nucleus; organelle lumen; ribosome	metabolic process	Pf01159; Pf03868	0.894589	9.44692	0.800223	8.86994	0.817169	10.2169	0.972522	7.32574	0.988317	9.2202	0.922984	7.94247	24.2432	10.1108
A2Y0Q8	Putative uncharacterized protein OS=Oryza sativa subsp. indica GN=OsI_18583 PE=4 SV=1 - [A2Y0Q8_ORYSI]	16.84	9	catalytic activity; nucleotide binding	cytoplasm; cytosol; membrane	metabolic process	Pf00300; Pf00686; Pf01591	1.02366	10.668	1.11297	19.0344	1.06154	15.9857	1.0058	7.83583	0.964679	10.7273	1.01067	10.9702	84.7391	6.48096
Q84VG2	Os09g0425900 protein OS=Oryza sativa subsp. japonica GN=Os09g0425900 PE=2 SV=1 - [Q84VG2_ORYSJ]	9.42	3		cytoplasm; membrane		Pf00335	0.99825	6.6728	0.963617	10.094	0.947858	9.72311	0.956928	7.82824	1.01157	9.66772	0.913828	11.2859	30.7255	8.82178
B8AQQ2	Putative uncharacterized protein OS=Oryza sativa subsp. indica GN=OsI_13319 PE=3 SV=1 - [B8AQQ2_ORYSI]	20.83	7	catalytic activity		metabolic process	Pf00282	1.07956	7.66327	1.00143	18.1846	0.960257	17.8087	0.890946	21.277	0.910887	12.4664	0.849991	22.7574	53.5971	5.49072
A2ZVA3	Putative uncharacterized protein OS=Oryza sativa subsp. japonica GN=OsJ_02565 PE=4 SV=1 - [A2ZVA3_ORYSJ]	5.98	3	catalytic activity; nucleotide binding	membrane	metabolic process	Pf00005; Pf01061; Pf08370	0.676893	1.52233	0.713395	3.8827	0.629956	8.46606	1.22163	2.8722	1.36362	11.7854	1.22557	1.83968	156.524	7.09326
Q6YPF1	Fructose-bisphosphate aldolase OS=Oryza sativa subsp. japonica GN=B1203H11.11 PE=2 SV=1 - [Q6YPF1_ORYSJ]	29.01	6	catalytic activity	cytoplasm	metabolic process; response to stimulus	Pf00274	1.14939	11.2904	1.15751	12.1265	1.12712	7.06297	0.932217	10.8306	0.910277	7.77591	0.888026	12.5606	38.3698	7.06396
Q53P96	Fructose-bisphosphate aldolase OS=Oryza sativa subsp. japonica GN=LOC_Os11g07020 PE=3 SV=1 - [Q53P96_ORYSJ]	30.85	11	catalytic activity	cytoplasm	metabolic process	Pf00274	0.941387	6.59537	0.870377	8.38077	0.874672	6.44783	0.961407	6.88625	0.986269	5.92382	0.9299	8.53073	39.3281	7.29834
Q658I5	LIMR family protein Os06g0128200 OS=Oryza sativa subsp. japonica GN=Os06g0128200 PE=2 SV=1 - [LMBD1_ORYSJ]	8.82	4		cytoplasm; membrane		Pf03619; Pf04791	0.900877	7.92949	0.841525	12.9668	0.848323	10.7885	1.02163	8.28776	1.06652	6.37681	0.989256	7.48181	56.0801	9.11475
B8BIC9	Putative uncharacterized protein OS=Oryza sativa subsp. indica GN=OsI_34730 PE=4 SV=1 - [B8BIC9_ORYSI]	13.39	5	catalytic activity; nucleotide binding; protein binding	membrane	cell communication; metabolic process; regulation of biological process; response to stimulus	Pf00069; Pf07714	0.886506	7.23522	0.844793	11.5935	0.894093	10.7036	1.00766	10.3704	1.05488	9.96142	1.03313	11.5995	54.3705	6.80029
A3AGN3	Putative uncharacterized protein OS=Oryza sativa subsp. japonica GN=OsJ_10362 PE=4 SV=1 - [A3AGN3_ORYSJ]	11.33	8	catalytic activity; DNA binding; nucleotide binding; transporter activity	membrane; nucleus	metabolic process; response to stimulus; transport	Pf00005; Pf00664; Pf06632	1.00761	9.13545	0.996472	18.8313	0.945482	18.3878	1.01468	9.61779	1.00552	6.16281	0.97272	11.0235	146.49	6.3667
Q6EQK1	Os09g0355400 protein OS=Oryza sativa subsp. japonica GN=OSJNBa0042H24.55-1 PE=2 SV=1 - [Q6EQK1_ORYSJ]	10.84	8	catalytic activity; nucleotide binding; protein binding	cytoplasm	metabolic process	Pf00069; Pf07714; Pf12799; Pf12819	0.993662	8.18013	0.933569	14.1762	0.939506	11.5191	0.928024	7.61484	0.984472	9.79759	0.95118	12.6136	98.4148	6.20166
A3BKU8	Putative uncharacterized protein OS=Oryza sativa subsp. japonica GN=OsJ_24632 PE=4 SV=1 - [A3BKU8_ORYSJ]	26.76	4	metal ion binding	cytoplasm; extracellular; membrane	metabolic process	Pf05757	0.932017	9.86798	0.942958	10.1799	0.874524	10.3825	1.06735	8.51183	1.02737	9.17215	1.02597	10.1141	22.5803	9.80322
A2X4T7	40S ribosomal protein S27 OS=Oryza sativa subsp. indica GN=OsI_07209 PE=3 SV=1 - [A2X4T7_ORYSI]	44.19	3	metal ion binding; structural molecule activity	cytoplasm; cytosol; membrane; nucleus; organelle lumen; ribosome	metabolic process	Pf01667	0.938328	9.63695	0.877971	10.6619	0.910083	8.23488	1.00529	8.41391	1.02631	7.9677	1.03046	9.48426	9.54578	8.73389
A6N1Q5	Putative uncharacterized protein (Fragment) OS=Oryza sativa subsp. indica PE=2 SV=1 - [A6N1Q5_ORYSI]	46.83	5				Pf01918	0.997665	5.37751	0.914785	2.91631	0.908891	8.02488	0.888154	4.29738	0.944973	9.05319	0.910909	7.7062	13.6391	6.58057
Q69X22	Phospholipase D OS=Oryza sativa subsp. japonica GN=P0481H08.1 PE=2 SV=1 - [Q69X22_ORYSJ]	21.88	10	catalytic activity; metal ion binding; protein binding	membrane	metabolic process	Pf00614; Pf12357	1.02933	11.0517	1.11046	15.0632	1.09094	16.7433	1.0386	10.1526	0.948976	10.9017	0.943471	13.426	92.4553	6.39209
Q69V57	Fructose-bisphosphate aldolase OS=Oryza sativa subsp. japonica GN=P0556B08.18 PE=2 SV=1 - [Q69V57_ORYSJ]	26.82	7	catalytic activity	cytoplasm	metabolic process; response to stimulus	Pf00274	0.943473	5.88703	0.939024	9.93791	0.955296	15.7346	0.988747	3.88292	1.01531	4.96533	0.998076	7.54507	37.7307	7.72314
Q6ETD9	Calmodulin-binding protein-like OS=Oryza sativa subsp. japonica GN=OJ1359_D06.7 PE=2 SV=1 - [Q6ETD9_ORYSJ]	13.07	4	protein binding				0.924359	9.18072	0.908546	14.3406	0.996242	10.7364	1.06012	12.4258	1.08417	8.00209	1.0533	12.6246	44.9598	8.71924
A6MZM7	40S ribosomal protein S14 (Fragment) OS=Oryza sativa subsp. indica PE=2 SV=1 - [A6MZM7_ORYSI]	47.59	5	structural molecule activity	cytoplasm; cytosol; membrane; nucleus; organelle lumen; ribosome	metabolic process	Pf00411	1.00788	12.2345	1.02315	20.2486	0.968499	9.20765	1.11112	12.098	1.02205	7.55543	0.994457	10.7584	15.7223	10.1987
A2YPE3	Putative uncharacterized protein OS=Oryza sativa subsp. indica GN=OsI_27138 PE=4 SV=1 - [A2YPE3_ORYSI]	16.43	8		membrane			1.01021	7.26298	0.956232	7.28784	0.953478	8.48621	0.923736	10.8213	0.95017	10.6543	0.917064	8.33898	103.663	8.49951
A6N0Q9	60S ribosomal protein l22-2 (Fragment) OS=Oryza sativa subsp. indica PE=2 SV=1 - [A6N0Q9_ORYSI]	42.86	2	structural molecule activity	cytoplasm; cytosol; membrane; nucleus; organelle lumen; ribosome	metabolic process	Pf01776	0.978563	8.41276	1.02994	17.507	0.951368	12.9704	1.0648	5.5753	1.04656	15.5539	0.978178	7.97716	12.0803	8.89502
Q6Z5Z5	Putative uncharacterized protein B1104G07.4-2 OS=Oryza sativa subsp. japonica GN=B1104G07.4-2 PE=4 SV=1 - [Q6Z5Z5_ORYSJ]	29.86	13				Pf03140	0.972533	11.0184	0.950743	17.5109	0.969995	17.0612	0.997101	10.1553	1.00294	9.14181	0.97897	6.68007	62.1815	7.60596
Q10BJ6	Methylenetetrahydrofolate reductase OS=Oryza sativa subsp. japonica GN=LOC_Os03g60090 PE=3 SV=1 - [Q10BJ6_ORYSJ]	20.94	11	catalytic activity		metabolic process	Pf02219	1.01275	8.27047	0.982787	9.88247	1.0146	10.9543	0.889255	8.45019	0.919165	12.407	0.891484	12.3974	64.0292	6.07471
Q10RS5	Transmembrane protein, putative, expressed OS=Oryza sativa subsp. japonica GN=LOC_Os03g05390 PE=4 SV=1 - [Q10RS5_ORYSJ]	4.59	1	transporter activity	cytoplasm; membrane	transport	Pf02040; Pf03600; Pf06450	1.18332	23.7588	1.15576	13.9607	1.04015	31.0333	0.937962	26.5723	0.936268	25.0794	1.11299	11.962	51.9149	5.49072
Q7F280	Isocitrate dehydrogenase [NADP] OS=Oryza sativa subsp. japonica GN=OSJNBb0006H05.32 PE=2 SV=1 - [Q7F280_ORYSJ]	25.24	10	catalytic activity; metal ion binding; nucleotide binding		metabolic process	Pf00180	1.02342	7.06677	1.02431	14.4213	1.02305	8.81757	0.990897	12.1894	0.973784	15.8221	0.971617	10.9775	46.0135	6.80029
B8B9N6	Putative uncharacterized protein OS=Oryza sativa subsp. indica GN=OsI_30253 PE=4 SV=1 - [B8B9N6_ORYSI]	17.52	3	catalytic activity; RNA binding; structural molecule activity	cytoplasm; ribosome	cellular homeostasis; metabolic process; regulation of biological process	Pf00687	0.926703	4.61689	0.955594	16.0122	0.932371	16.1201	1.03127	25.4936	1.06949	23.9069	1.02815	20.9697	57.7358	9.67139
Q5N747	Os01g0871500 protein OS=Oryza sativa subsp. japonica GN=P0491F11.2 PE=4 SV=1 - [Q5N747_ORYSJ]	13.03	6	transporter activity	membrane	response to stimulus; transport	Pf00854	0.967613	13.0188	0.908232	10.995	0.974481	17.1513	0.993347	11.3322	1.01357	7.74645	1.02167	14.7772	58.9531	8.20654
Q6K4P5	Diacylglycerol kinase-like OS=Oryza sativa subsp. japonica GN=OSJNBa0054K20.17 PE=1 SV=1 - [Q6K4P5_ORYSJ]	25	13	catalytic activity		cell communication; metabolic process; regulation of biological process; response to stimulus	Pf00609; Pf00781	0.9179	9.29317	0.953965	19.5839	0.900104	16.1713	0.980022	12.4162	1.02843	12.43	1.02229	13.6169	53.9434	6.72705
Q94E63	Os01g0173100 protein OS=Oryza sativa subsp. japonica GN=OSJNBa0089K24.5 PE=2 SV=1 - [Q94E63_ORYSJ]	41.45	3		membrane; nucleus		Pf01918	1.025	18.1706	1.14239	17.183	1.17066	19.2287	1.00262	22.0262	0.874349	35.6497	1.11522	25.6796	16.2504	5.09717
P14656	Glutamine synthetase cytosolic isozyme 1-1 OS=Oryza sativa subsp. japonica GN=GLN1-1 PE=1 SV=1 - [GLN11_ORYSJ]	17.7	6	catalytic activity; nucleotide binding	cytoplasm	metabolic process	Pf00120; Pf03951	1.06371	18.0776	1.04731	8.99514	1.03279	16.7583	0.898777	12.35	0.923075	13.0853	0.919779	20.2934	39.1764	5.73193
Q75LD9	Os03g0843300 protein OS=Oryza sativa subsp. japonica GN=OSJNBa0032G11.5 PE=2 SV=1 - [Q75LD9_ORYSJ]	15.51	4		membrane	response to stimulus	Pf03168	0.989474	6.71512	0.940757	11.6684	0.952061	8.85146	0.94604	8.87444	0.980334	9.05266	0.908755	9.24007	34.7769	5.05908
Q6K1R5	Putative adenosine kinase OS=Oryza sativa subsp. japonica GN=B1215B07.34 PE=2 SV=1 - [Q6K1R5_ORYSJ]	27.27	8	catalytic activity; metal ion binding	cytoplasm; extracellular; membrane	metabolic process; response to stimulus	Pf00294; Pf05693	1.05349	8.42747	0.991267	10.5825	0.987969	9.22025	0.918124	9.93168	0.931133	11.7966	0.891884	13.9321	36.9697	5.16064
P29545	Elongation factor 1-beta OS=Oryza sativa subsp. japonica GN=Os07g0662500 PE=1 SV=3 - [EF1B_ORYSJ]	44.2	6	RNA binding	cytoplasm; extracellular	defense response; metabolic process; response to stimulus	Pf00043; Pf00736	1.06329	10.2726	1.06081	24.8466	0.986598	17.4	0.966716	14.4109	0.902952	10.7504	0.927974	14.6912	23.785	4.76709
A2ZAG4	Putative uncharacterized protein OS=Oryza sativa subsp. indica GN=OsI_34739 PE=4 SV=1 - [A2ZAG4_ORYSI]	14.18	8	protein binding			Pf12799	0.97396	20.4355	0.929542	22.7388	0.98259	19.1247	1.02619	9.74567	1.02441	7.5698	1.05065	10.7252	59.1691	5.14795
A2XGP6	Superoxide dismutase [Cu-Zn] 1 OS=Oryza sativa subsp. indica GN=SODCC1 PE=2 SV=2 - [SODC1_ORYSI]	34.21	2	antioxidant activity; catalytic activity; metal ion binding	cytoplasm	defense response; metabolic process; response to stimulus	Pf00080	0.978835	17.6256	1.20624	35.7856	0.93206	14.6709	0.929191	9.46959	0.87837	19.4428	0.928487	12.5663	15.2416	6.17627
Q0DTF5	Os03g0251000 protein OS=Oryza sativa subsp. japonica GN=Os03g0251000 PE=4 SV=1 - [Q0DTF5_ORYSJ]	5.06	1		cytoplasm	transport		1.00004	5.78013	0.933561	6.352	0.904739	7.37244	0.920593	6.73803	0.962674	6.48661	0.875799	6.64451	15.6523	8.25049
Q75GE8	Calcium-dependent protein kinase, isoform AK1, putative, expressed OS=Oryza sativa subsp. japonica GN=OSJNBa0060M17.7 PE=2 SV=1 - [Q75GE8_ORYSJ]	22.68	9	catalytic activity; metal ion binding; nucleotide binding	cytoplasm; membrane; nucleus	cell communication; metabolic process; regulation of biological process; response to stimulus	Pf00036; Pf00069; Pf07714	1.02259	6.71757	1.00115	13.8974	1.00792	11.7128	1.0239	8.34833	0.99519	6.62689	1.03162	7.54734	60.6197	6.60986
Q762A6	60S ribosomal protein L22-2, putative, expressed OS=Oryza sativa subsp. japonica GN=bip108 PE=2 SV=1 - [Q762A6_ORYSJ]	41.22	3	structural molecule activity	cytoplasm; cytosol; membrane; nucleus; organelle lumen; ribosome	metabolic process	Pf01776	0.901997	3.97844	0.95549	29.8291	0.965391	35.4825	1.02279	10.0912	1.01189	15.9737	1.03906	16.9894	14.4626	9.5542
A1XFD9	UDP-glycosyltransferase-like protein OS=Oryza sativa subsp. indica GN=Pi2_C101A51.16 PE=3 SV=1 - [A1XFD9_ORYSI]	19.32	1	catalytic activity		metabolic process	Pf00201	1.10987	6.13382	1.19811	12.3976	1.14104	13.8034	0.98149	6.81465	0.973067	5.7841	1.03206	11.3962	49.3423	5.93506
Q75J49	Protein kinase, putative, expressed OS=Oryza sativa subsp. japonica GN=OSJNBa0066H15.2 PE=2 SV=1 - [Q75J49_ORYSJ]	32.98	10	catalytic activity; nucleotide binding	membrane	metabolic process	Pf00069; Pf07714	0.937621	14.4031	0.992127	31.2436	0.971922	17.65	0.986703	14.6126	1.03284	15.6268	1.00881	22.2922	41.731	7.94287
Q0J5V5	Os08g0398700 protein OS=Oryza sativa subsp. japonica GN=Os08g0398700 PE=2 SV=1 - [Q0J5V5_ORYSJ]	11.43	9	catalytic activity; metal ion binding	membrane	metabolic process	Pf01433	1.01955	15.3319	0.963326	14.7257	1.02159	14.8376	0.926267	11.3585	0.937822	11.4792	0.916204	11.7644	97.842	5.38916
Q01L89	OSIGBa0076I14.3 protein OS=Oryza sativa GN=OSIGBa0076I14.3 PE=4 SV=1 - [Q01L89_ORYSA]	38.33	6			response to stimulus	Pf02496	1.27724	16.7528	1.3222	20.3499	1.26557	21.6606	0.807322	27.6681	0.916629	33.5404	0.9603	31.7895	25.2684	5.05908
Q8GU51	MRP-like ABC transporter (Fragment) OS=Oryza sativa subsp. japonica GN=mrp1 PE=3 SV=1 - [Q8GU51_ORYSJ]	9.34	12	catalytic activity; nucleotide binding; transporter activity	cytoplasm; membrane; vacuole	metabolic process; response to stimulus; transport	Pf00005; Pf00664	0.985536	14.3596	0.993482	15.3873	0.993531	15.2995	0.994408	7.93173	0.998058	9.11209	1.02214	8.84033	182.9	6.78564
P83647	Profilin LP04 OS=Oryza sativa subsp. indica GN=OsI_020954 PE=1 SV=2 - [PROFX_ORYSI]	38.93	5	protein binding	cytoplasm; cytoskeleton	cell organization and biogenesis	Pf00235	1.04166	9.77409	1.00881	17.5396	0.988219	14.9246	0.933004	13.5805	0.948537	9.65427	0.932315	12.5017	14.1239	4.86865
Q7F1H3	Blue copper-binding protein-like OS=Oryza sativa subsp. japonica GN=OJ1118_G09.114 PE=1 SV=1 - [Q7F1H3_ORYSJ]	26.4	4	metal ion binding	cytoplasm		Pf02298	0.787167	13.564	0.710288	16.8097	0.690881	17.262	1.15991	6.25294	1.20904	10.165	1.14451	9.32273	19.1984	8.5874
Q0DEU8	Os06g0133800 protein (Fragment) OS=Oryza sativa subsp. japonica GN=Os06g0133800 PE=1 SV=1 - [Q0DEU8_ORYSJ]	15.93	9	catalytic activity	cytoplasm	metabolic process; response to stimulus	Pf00456; Pf00676; Pf02775; Pf02779; Pf02780	0.900663	6.93056	0.869246	11.9293	0.875504	14.1076	1.03425	13.2698	1.04587	10.6891	1.01198	8.89793	73.4028	5.66846
Q948T6	Lactoylglutathione lyase OS=Oryza sativa subsp. japonica GN=GLX-I PE=1 SV=2 - [LGUL_ORYSJ]	25.77	7	catalytic activity; metal ion binding	cytoplasm; membrane; vacuole	response to stimulus	Pf00903; Pf12681	1.01761	5.91384	0.951672	12.4379	0.952173	10.5066	0.913878	10.5794	0.976937	9.66105	0.888341	10.1175	32.5326	5.66846
Q8GU86	Pleiotropic drug resistance protein 5 OS=Oryza sativa subsp. japonica GN=PDR5 PE=2 SV=2 - [PDR5_ORYSJ]	6.46	8	catalytic activity; nucleotide binding	membrane	metabolic process; transport	Pf00005; Pf01061; Pf08370	0.926071	14.8816	0.95353	26.905	0.857248	18.0854	1.01928	13.0078	0.948819	12.989	1.07432	10.0503	163.795	8.29443
A2YWY6	Putative uncharacterized protein OS=Oryza sativa subsp. indica GN=OsI_29848 PE=4 SV=1 - [A2YWY6_ORYSI]	30.56	14	protein binding	membrane		Pf12799	0.994041	16.1813	1.05202	28.5183	1.04564	25.6803	1.04069	7.84758	1.03621	9.15108	1.06466	9.20581	62.3043	6.91748
P49397	40S ribosomal protein S3a OS=Oryza sativa subsp. japonica GN=RPS3A PE=2 SV=2 - [RS3A_ORYSJ]	36.64	5	structural molecule activity	cytoplasm; cytosol; membrane; nucleus; organelle lumen; ribosome	metabolic process	Pf01015	1.00967	13.6846	0.978456	18.8956	0.955481	19.4335	1.04247	12.1802	1.04984	11.8533	1.04922	17.7068	29.7088	9.80322
Q2R1J7	40S ribosomal protein S9, putative, expressed OS=Oryza sativa subsp. japonica GN=LOC_Os11g38949 PE=3 SV=1 - [Q2R1J7_ORYSJ]	44.27	8	RNA binding; structural molecule activity	cytoplasm; cytosol; membrane; nucleus; organelle lumen; ribosome	metabolic process	Pf00163; Pf01479	0.928499	5.71328	0.861926	6.24867	0.889665	7.28665	1.02151	5.05022	1.03381	5.998	0.994237	7.17742	22.3469	10.2134
P40393	Ras-related protein RIC2 OS=Oryza sativa subsp. japonica GN=RIC2 PE=2 SV=2 - [RIC2_ORYSJ]	47	3	nucleotide binding	cytoplasm; membrane; nucleus; vacuole	cell communication; regulation of biological process; response to stimulus; transport	Pf00025; Pf00071; Pf04670; Pf08477	1.02082	16.69	1.09232	19.9991	1.02283	14.6285	1.03338	13.0178	0.971279	12.0563	0.992682	10.085	23.9081	5.73193
Q6ZFH9	Os08g0503200 protein OS=Oryza sativa subsp. japonica GN=OJ1506_F01.22 PE=2 SV=1 - [Q6ZFH9_ORYSJ]	14.14	9	catalytic activity	cytoplasm; extracellular; membrane	cell differentiation; cell growth; cell organization and biogenesis; development; metabolic process	Pf03009	1.02085	12.4751	0.975208	22.1689	0.959462	19.8364	1.00137	15.5604	1.0095	19.1926	0.971026	15.7627	83.526	5.63037
Q5VNT9	Os06g0136600 protein OS=Oryza sativa subsp. japonica GN=P0001H02.35 PE=3 SV=1 - [Q5VNT9_ORYSJ]	18.39	2	catalytic activity; metal ion binding	cell surface; cytoplasm; cytosol	metabolic process	Pf00113; Pf03952	1.20237	6.16096	1.28942	21.0167	1.24128	26.9274	1.04899	2.70457	0.944096	1.58944	1.12409	16.4028	47.9084	5.56689
Q6ETC4	Os02g0448400 protein OS=Oryza sativa subsp. japonica GN=OJ1538_H05.7 PE=4 SV=1 - [Q6ETC4_ORYSJ]	18.4	7	protein binding	cytoplasm; endosome; membrane; vacuole	cell organization and biogenesis; reproduction; response to stimulus; transport	Pf00168	0.981126	9.53892	1.00149	12.6101	0.978216	11.745	1.04011	13.1967	1.06731	10.9134	1.01282	10.16	60.9882	6.81494
Q84VE0	Phenylalanine ammonia-lyase OS=Oryza sativa subsp. japonica PE=2 SV=1 - [Q84VE0_ORYSJ]	12.97	2	catalytic activity	cytoplasm	metabolic process	Pf00221	1.25714	21.392	1.99819	41.0543	1.33026	14.9148	1.24487	3.97014	0.834031	10.0904	0.886531	20.1367	72.2323	6.53662
Q945W5	Glutathione S-transferase GSTU6, putative, expressed OS=Oryza sativa subsp. japonica GN=OSJNBa0034L04.1 PE=2 SV=1 - [Q945W5_ORYSJ]	19.31	4	catalytic activity; protein binding	cytoplasm	development; metabolic process; response to stimulus	Pf00043; Pf02798	1.02434	7.69412	0.925339	11.1865	0.96253	8.42065	0.940771	9.17122	0.971192	9.66588	0.911155	6.93189	24.743	5.47803
Q850L6	Putative oligopeptide transporter protein OS=Oryza sativa subsp. japonica GN=OSJNBa0032E21.14 PE=4 SV=1 - [Q850L6_ORYSJ]	13.77	7		membrane	transport	Pf03169	0.967078	15.2976	0.971078	22.1611	1.00111	19.1971	0.972256	11.1823	0.970792	13.6013	0.949733	10.8226	79.9784	9.0415
Q5N7Z9	Os01g0227300 protein OS=Oryza sativa subsp. japonica GN=P0452F10.8 PE=2 SV=1 - [Q5N7Z9_ORYSJ]	36.71	2	catalytic activity; nucleotide binding	cytoplasm; membrane; nucleus; vacuole	cell communication; regulation of biological process; response to stimulus; transport	Pf00009; Pf00025; Pf00071; Pf04670; Pf08477	0.980276	8.00324	0.936844	4.90744	0.931693	7.76392	1.07492	15.4308	1.11646	3.1842	0.923088	8.71188	23.1225	5.51611
Q6I587	Os05g0585500 protein OS=Oryza sativa subsp. japonica GN=OSJNBa0009C07.9 PE=4 SV=1 - [Q6I587_ORYSJ]	16.61	2	catalytic activity; metal ion binding; nucleotide binding	cytoplasm; membrane; vacuole	cell communication; metabolic process; regulation of biological process; response to stimulus; transport	Pf00036; Pf00069; Pf07714	1.15399	37.6146	1.27228	6.59789	0.842701	52.9617	1.13838	13.2345	0.950429	5.42573	0.830051	5.33157	61.335	6.771
Q10E47	Expressed protein OS=Oryza sativa subsp. japonica GN=Os03g0708400 PE=2 SV=1 - [Q10E47_ORYSJ]	6.87	2	catalytic activity	cytoplasm; membrane; vacuole	metabolic process	Pf06966	1.11578	18.0996	1.00005	17.6088	1.15604	12.3974	1.08345	14.6559	1.07683	12.011	1.17996	15.0328	32.9696	8.11865
Q6ZD89	Flavone 3'-O-methyltransferase 1 OS=Oryza sativa subsp. japonica GN=ROMT-9 PE=1 SV=1 - [OMT1_ORYSJ]	33.15	11	catalytic activity; protein binding	cytoplasm; membrane; nucleus	metabolic process	Pf00891; Pf08100	1.04553	7.45977	0.995625	12.9814	0.989875	16.0778	0.902184	7.21811	0.932242	10.0605	0.913124	11.2349	39.7238	5.65576
O49218	Methylmalonate semi-aldehyde dehydrogenase OS=Oryza sativa GN=MMSDH1 PE=2 SV=1 - [O49218_ORYSA]	7.33	3	catalytic activity; metal ion binding	cytoplasm; mitochondrion	metabolic process; response to stimulus	Pf00171	0.951189	14.6417	1.01909	10.8169	0.954438	16.3971	1.10344	12.911	1.13749	14.7419	1.1314	13.8939	56.9438	6.354
Q6H5Y1	Os02g0228300 protein OS=Oryza sativa subsp. japonica GN=P0620H05.25 PE=4 SV=1 - [Q6H5Y1_ORYSJ]	15.8	13	catalytic activity; nucleotide binding; protein binding	cytoplasm; membrane	metabolic process	Pf00069; Pf07714; Pf12799	1.05874	5.35919	1.04084	9.63891	1.04999	7.73225	0.880813	10.7564	0.933447	9.72072	0.904084	10.9584	110.726	5.71924
Q7F1K9	Os07g0495000 protein OS=Oryza sativa subsp. japonica GN=OJ1058_B11.119 PE=2 SV=1 - [Q7F1K9_ORYSJ]	6.15	1	catalytic activity	cytoplasm	metabolic process	Pf07883	1.19228	10.1126	1.141	14.088	1.1618	9.04579	1.02468	8.41882	0.917632	13.5265	1.01813	10.5134	34.0846	6.45557
Q7F225	Os07g0109500 protein OS=Oryza sativa subsp. japonica GN=OJ1567_G09.119 PE=2 SV=1 - [Q7F225_ORYSJ]	20.39	3	structural molecule activity	cytoplasm; ribosome	metabolic process	Pf00572	0.893389	5.22971	0.94019	12.0849	0.982224	10.3904	0.966013	5.54146	0.989022	6.81017	0.980644	12.4319	23.6569	10.4624
Q40674	Peptidyl-prolyl cis-trans isomerase OS=Oryza sativa GN=Cyp2 PE=2 SV=1 - [Q40674_ORYSA]	51.74	7	catalytic activity	cytoplasm; extracellular; membrane	metabolic process; response to stimulus	Pf00160	1.01628	9.04011	0.997468	14.6554	1.03196	23.6421	0.966804	10.2526	0.994105	10.2596	0.954612	13.3168	18.3191	8.33838
Q6K4T4	Os02g0283800 protein OS=Oryza sativa subsp. japonica GN=OSJNBa0018M09.11 PE=4 SV=1 - [Q6K4T4_ORYSJ]	19.11	4	catalytic activity; nucleotide binding; protein binding		metabolic process	Pf00069; Pf07714; Pf08263	0.987281	11.2285	0.910767	6.54592	0.955126	15.7447	0.988479	6.85733	0.983779	12.9699	1.04459	4.72979	67.6167	5.71924
Q84M35	40S ribosomal protein S2, putative, expressed OS=Oryza sativa subsp. japonica GN=OSJNBa0059E14.8 PE=1 SV=1 - [Q84M35_ORYSJ]	41.24	11	RNA binding; structural molecule activity	cytoplasm; cytosol; membrane; nucleus; organelle lumen; ribosome	metabolic process	Pf00333; Pf03719	0.950413	8.99815	0.908752	10.7428	0.925363	10.2074	0.991614	7.79897	0.989728	12.085	0.962773	12.8484	29.957	10.228
B8BBP9	Putative uncharacterized protein OS=Oryza sativa subsp. indica GN=OsI_28198 PE=4 SV=1 - [B8BBP9_ORYSI]	13.58	6	catalytic activity; nucleotide binding	cytoplasm; membrane	metabolic process	Pf00069; Pf07714; Pf11721; Pf12819	0.899066	20.0246	1.00285	29.9702	1.02881	28.2004	1.21914	11.1398	1.21472	21.5517	1.21271	12.96	97.9894	7.63525
A2YH23	Putative uncharacterized protein OS=Oryza sativa subsp. indica GN=OsI_24487 PE=3 SV=1 - [A2YH23_ORYSI]	13.61	4	catalytic activity	cytoplasm	metabolic process	Pf00026	0.956998	9.26803	0.959905	16.8263	1.10413	17.3448	0.96084	11.4846	0.901626	15.5079	0.958371	9.94429	57.5643	5.69385
Q6YZX6	Putative aconitate hydratase, cytoplasmic OS=Oryza sativa subsp. japonica GN=Os08g0191100 PE=3 SV=1 - [ACOC_ORYSJ]	15.7	10	catalytic activity; metal ion binding	cytoplasm	metabolic process	Pf00330; Pf00694	1.00513	7.16758	1.05716	8.64983	1.03848	9.4186	0.948849	9.28892	0.935593	15.8745	0.951345	13.5307	98.0206	6.01123
Q7XQU7	Probable protein phosphatase 2C 41 OS=Oryza sativa subsp. japonica GN=Os04g0452000 PE=2 SV=2 - [P2C41_ORYSJ]	26.06	9	catalytic activity; metal ion binding	membrane; nucleus	cell communication; metabolic process; regulation of biological process; response to stimulus	Pf00481	1.02731	11.0828	1.01129	12.8383	0.987784	10.6648	0.963639	9.2849	0.995204	8.58085	0.990166	12.1537	30.9907	6.31592
Q8S6N5	Acetyl-CoA carboxylase 1 OS=Oryza sativa subsp. japonica GN=ACC1 PE=3 SV=1 - [ACC1_ORYSJ]	12.35	26	catalytic activity; metal ion binding; nucleotide binding	cytoplasm; cytosol	metabolic process	Pf00289; Pf00364; Pf01039; Pf02222; Pf02655; Pf02785; Pf02786; Pf07478; Pf08326	0.99649	7.16847	0.998621	11.7255	0.979492	17.2193	0.944959	7.42872	0.978086	10.1329	0.938676	10.79	252.65	6.40479
P28757	Superoxide dismutase [Cu-Zn] 2 OS=Oryza sativa subsp. japonica GN=SODCC2 PE=1 SV=2 - [SODC2_ORYSJ]	34.21	2	antioxidant activity; catalytic activity; metal ion binding	cytoplasm	defense response; metabolic process; response to stimulus	Pf00080	0.978662	3.89971	1.18397	14.5648	0.836912	8.64733	0.886275	0.946494	0.840295	13.9182	0.854088	3.03321	15.0714	6.41748
A2XN04	Putative uncharacterized protein OS=Oryza sativa subsp. indica GN=OsI_13933 PE=4 SV=1 - [A2XN04_ORYSI]	11.6	9		cytoplasm; endosome; membrane		Pf03635	0.967311	6.8038	0.902977	11.1818	0.93605	18.3315	0.958717	9.15751	0.963656	10.0386	0.98611	9.66935	89.7831	5.36377
Q6AVS5	Expressed protein OS=Oryza sativa subsp. japonica GN=OSJNBa0027J18.5 PE=2 SV=1 - [Q6AVS5_ORYSJ]	18.58	5				Pf01918	1.03017	12.7383	0.942167	11.7941	0.992862	14.4329	0.962917	11.369	0.994766	12.4188	0.996406	6.57567	32.4979	9.94971
Q9SLX0	Importin subunit alpha-1b OS=Oryza sativa subsp. japonica GN=Os05g0155500 PE=1 SV=2 - [IMA1B_ORYSJ]	20.04	6	protein binding; transporter activity	cytoplasm; nucleus	transport	Pf00514; Pf01749; Pf02985	1.00092	6.91867	0.946725	14.074	0.976834	13.0589	1.0084	8.91534	1.04473	7.75224	1.04297	7.80399	58.5299	5.31299
Q2QLJ0	9,10-9',10' carotenoid cleavage dioxygenase 1, putative, expressed OS=Oryza sativa subsp. japonica GN=LOC_Os12g44310 PE=4 SV=2 - [Q2QLJ0_ORYSJ]	21.85	12	catalytic activity	cytoplasm; membrane; vacuole	metabolic process; response to stimulus	Pf03055	1.07684	9.37974	1.08821	17.588	1.06682	12.0671	0.996009	12.7768	0.936888	7.16317	0.935275	7.81364	60.9087	6.32861
G8CTM8	Ribulose bisphosphate carboxylase activase small isoform OS=Oryza sativa subsp. japonica PE=2 SV=1 - [G8CTM8_ORYSJ]	26.79	11	nucleotide binding			Pf00004	0.984933	9.14242	0.969263	22.1708	0.924771	15.8542	0.982445	18.0677	0.969146	12.4364	0.936819	10.6444	47.8998	6.15088
Q2R351	Respiratory burst oxidase protein D, putative, expressed OS=Oryza sativa subsp. japonica GN=LOC_Os11g33120 PE=4 SV=2 - [Q2R351_ORYSJ]	20.83	14	antioxidant activity; catalytic activity; metal ion binding	cytoplasm; cytosol; membrane; ribosome; vacuole	cell death; cell differentiation; defense response; development; metabolic process; regulation of biological process; response to stimulus	Pf00033; Pf01794; Pf08022; Pf08030; Pf08414	0.945368	12.1027	0.994336	13.2144	0.99891	16.2913	0.983864	8.97532	0.964656	9.5827	0.967006	9.4263	105.119	9.12939
B8B5T6	Xylose isomerase OS=Oryza sativa subsp. indica GN=OsI_27268 PE=3 SV=1 - [B8B5T6_ORYSI]	22.18	10	catalytic activity; metal ion binding	cytoplasm; endoplasmic reticulum; membrane; vacuole	metabolic process	Pf01261	0.967203	6.20374	0.890487	8.86231	0.870196	9.00644	0.952151	7.68917	1.00065	7.73823	0.942487	9.74293	53.3297	5.65576
A3C6Q9	Putative uncharacterized protein OS=Oryza sativa subsp. japonica GN=OsJ_32247 PE=4 SV=1 - [A3C6Q9_ORYSJ]	8.05	1	protein binding	cytoplasm	development; response to stimulus	Pf02798	1.02517	8.19721	0.997842	1.61545	1.04442	1.61715	0.942365	4.91657	0.978268	5.54786	0.966897	8.41728	25.6984	5.75732
Q6K9T1	Oligopeptidase A-like OS=Oryza sativa subsp. japonica GN=OJ1124_D06.18 PE=2 SV=1 - [Q6K9T1_ORYSJ]	14.94	10	catalytic activity; metal ion binding	cytoplasm; cytosol; extracellular	metabolic process; response to stimulus	Pf01432	0.997208	6.67419	0.979325	8.97798	0.963516	8.0195	0.928145	9.80738	0.985381	8.98895	0.908781	9.43276	86.1641	6.07471
Q53JH1	At5g64090 OS=Oryza sativa subsp. japonica GN=Os11g0169600 PE=2 SV=1 - [Q53JH1_ORYSJ]	3.74	1		cytoplasm; membrane		Pf09790	1.20809	9.24668	1.27606	7.88911	1.196	6.78531	1.04713	9.84528	0.92097	10.4801	0.991223	8.89905	44.6931	7.28369
B9FNR7	Lipoxygenase OS=Oryza sativa subsp. japonica GN=OsJ_17977 PE=3 SV=1 - [B9FNR7_ORYSJ]	16.23	13	catalytic activity; metal ion binding; protein binding	cytoplasm; membrane	metabolic process	Pf00305; Pf01477	1.059	13.4141	1.02057	13.7913	1.02284	14.608	0.948461	9.34229	0.955382	9.13065	0.93301	7.76341	93.5438	8.646
Q6Z4B7	Os07g0510500 protein OS=Oryza sativa subsp. japonica GN=P0409B11.26 PE=4 SV=1 - [Q6Z4B7_ORYSJ]	12.99	3	catalytic activity		metabolic process	Pf00201	1.23271	5.75097	1.27982	9.54815	1.28968	8.58678	0.860966	12.5261	0.878448	7.8943	0.818474	11.1333	52.1052	6.60986
Q67IZ5	Os09g0462100 protein OS=Oryza sativa subsp. japonica GN=OSJNBa0054F02.43 PE=2 SV=1 - [Q67IZ5_ORYSJ]	8.16	2	catalytic activity		metabolic process	Pf00135; Pf07859	1.15854	5.7392	1.18606	8.43313	1.21144	11.7707	0.981732	12.6558	0.901048	17.4569	0.969946	14.9344	41.1674	7.98682
Q84XH0	Phosphoenolpyruvate carboxylase OS=Oryza sativa subsp. indica GN=PEPC PE=2 SV=1 - [Q84XH0_ORYSI]	18.05	10	catalytic activity; metal ion binding	cytoplasm; cytosol; extracellular	metabolic process	Pf00311	1.07122	11.7839	1.09248	15.2602	1.05362	23.5865	0.977602	12.0029	1.01474	13.5638	1.00751	7.82939	109.852	5.94775
B9FDF9	Putative uncharacterized protein OS=Oryza sativa subsp. japonica GN=OsJ_13628 PE=4 SV=1 - [B9FDF9_ORYSJ]	14.11	10	metal ion binding; protein binding	cytoplasm; membrane	cell organization and biogenesis; transport	Pf04810; Pf04811; Pf04815; Pf08033	1.03643	9.60718	1.09464	26.451	1.00467	15.4541	0.953143	6.33451	0.970291	6.82967	0.959584	9.98726	88.415	6.66846
Q9FU86	Os01g0142800 protein OS=Oryza sativa subsp. japonica GN=P0019D06.17-1 PE=2 SV=1 - [Q9FU86_ORYSJ]	12.07	6	transporter activity	membrane	cell differentiation; cell growth; cell organization and biogenesis; development; metabolic process; reproduction; transport	Pf00854	1.00785	6.24927	1.00379	6.57405	1.00177	13.1255	0.883298	11.2773	0.915077	6.84636	0.885795	12.6415	63.0571	6.68311
B9FJP3	Putative uncharacterized protein OS=Oryza sativa subsp. japonica GN=OsJ_17832 PE=4 SV=1 - [B9FJP3_ORYSJ]	12.53	2	catalytic activity; nucleotide binding; protein binding	cytoplasm; membrane	metabolic process	Pf00069; Pf00946; Pf07714; Pf11721; Pf12819	0.857177	9.60992	0.860644	20.5246	0.877689	12.1656	0.904576	11.5451	0.875466	26.2698	0.941407	18.3791	91.5955	7.44482
Q33B25	Armadillo/beta-catenin-like repeat family protein, expressed OS=Oryza sativa subsp. japonica GN=Os10g0147900 PE=2 SV=1 - [Q33B25_ORYSJ]	23.18	12	protein binding	cytoplasm; membrane; nucleus	cell differentiation; cell growth; cell organization and biogenesis; development; reproduction		1.02659	16.9423	1.07791	23.9824	0.975897	15.6574	0.938271	17.5793	0.958391	17.2257	0.987932	15.9722	69.9141	7.37158
B8ADW1	Putative uncharacterized protein OS=Oryza sativa subsp. indica GN=OsI_06321 PE=4 SV=1 - [B8ADW1_ORYSI]	4.37	2	catalytic activity; nucleotide binding	membrane	metabolic process	Pf00005; Pf01061; Pf08370	1.31895	21.2787	1.55652	57.8366	1.54018	36.2246	1.27944	77.3595	1.03175	47.0472	1.79256	126.626	162.544	6.94678
B8BGL9	Putative uncharacterized protein OS=Oryza sativa subsp. indica GN=OsI_33412 PE=4 SV=1 - [B8BGL9_ORYSI]	3.34	2	catalytic activity; nucleotide binding; protein binding	cytoplasm; cytosol; membrane; nucleus	metabolic process	Pf00069; Pf07714; Pf08263; Pf12799	0.983223	3.61733	0.975395	3.71871	0.971475	3.38953	1.02469	2.57245	1.04652	4.19371	1.037	6.58116	78.7247	6.88818
Q2QYY2	Leucine-rich repeat family protein, putative, expressed OS=Oryza sativa subsp. japonica GN=LOC_Os12g01200 PE=2 SV=2 - [Q2QYY2_ORYSJ]	14.98	11	catalytic activity; nucleotide binding	cytoplasm; membrane	metabolic process	Pf00069; Pf07714; Pf12799; Pf12819	0.953378	11.5754	0.869111	14.1504	0.895164	14.2215	0.968724	8.71397	0.989191	8.05934	0.926641	8.43986	101.88	5.68115
A2X8C2	Putative uncharacterized protein OS=Oryza sativa subsp. indica GN=OsI_08480 PE=4 SV=1 - [A2X8C2_ORYSI]	11.37	7	catalytic activity; nucleotide binding		metabolic process	Pf00069; Pf01476; Pf07714	0.98128	12.8986	0.911828	17.5432	0.925164	17.1222	1.01345	11.3032	1.05667	11.7057	1.02012	12.0483	70.1856	6.354
Q69T78	Putative Pyrophosphate--fructose 6-phosphate 1-phosphotransferase alpha subunit OS=Oryza sativa subsp. japonica GN=P0652D10.35 PE=4 SV=1 - [Q69T78_ORYSJ]	4.05	1	catalytic activity; nucleotide binding	cytoplasm; cytosol	metabolic process; response to stimulus	Pf00365	1.1269	6.00407	1.21218	7.5383	1.15278	6.45949	0.986864	8.53131	1.00578	6.25567	1.01156	11.8936	67.0703	7.25439
Q6K669	Leucine aminopeptidase 2, chloroplastic OS=Oryza sativa subsp. japonica GN=Os02g0794700 PE=2 SV=1 - [AMPL2_ORYSJ]	18.9	8	catalytic activity; metal ion binding	cytoplasm; vacuole	metabolic process; response to stimulus	Pf00883; Pf02789	1.00837	7.05934	0.987029	9.17072	0.993974	8.27668	0.911796	8.19251	0.919815	12.0462	0.938298	8.86104	61.7799	8.104
Q6ZBX8	Putative aminopeptidase N OS=Oryza sativa subsp. japonica GN=P0543D10.15 PE=1 SV=1 - [Q6ZBX8_ORYSJ]	10.51	8	catalytic activity; metal ion binding		metabolic process	Pf01433; Pf11940	1.0899	9.65142	1.13488	15.2556	1.10947	9.67484	0.964556	9.0699	0.977892	11.5229	0.944224	6.22493	97.9701	5.65576
B8AXT7	Putative uncharacterized protein OS=Oryza sativa subsp. indica GN=OsI_19719 PE=4 SV=1 - [B8AXT7_ORYSI]	17.28	7	protein binding	membrane	cell death; regulation of biological process	Pf00168; Pf07002	0.958242	8.21819	0.953723	12.5068	0.95559	14.8599	1.05588	10.1544	1.01972	11.6304	1.01224	14.3337	64.8656	5.73193
Q65XA0	Dehydroascorbate reductase OS=Oryza sativa subsp. japonica GN=OJ1654_B10.18 PE=2 SV=1 - [Q65XA0_ORYSJ]	56.34	9	metal ion binding; protein binding	cytoplasm; extracellular; membrane; mitochondrion; vacuole	metabolic process; regulation of biological process; response to stimulus	Pf00043; Pf02798	1.04274	9.24823	1.02996	12.4372	0.968782	13.7868	0.969536	10.2432	0.942912	9.81135	0.935235	10.0521	23.5552	6.21436
B8BE27	Phospholipase D OS=Oryza sativa subsp. indica GN=OsI_32238 PE=3 SV=1 - [B8BE27_ORYSI]	19.15	13	catalytic activity; metal ion binding; protein binding	cytoplasm; membrane; vacuole	cell death; metabolic process; response to stimulus	Pf00168; Pf00614; Pf12357	1.00411	15.1964	1.02794	19.242	0.999637	16.6175	0.990813	10.4134	0.962729	10.0545	0.998525	9.69579	95.5122	7.1665
Q7XKB5	Pyruvate kinase OS=Oryza sativa subsp. japonica GN=OSJNBa0064G10.16 PE=2 SV=2 - [Q7XKB5_ORYSJ]	21.14	10	catalytic activity; metal ion binding	membrane	metabolic process; response to stimulus	Pf00224; Pf02887	1.0394	6.58087	0.980133	12.5578	1.01742	12.1298	0.884099	12.7032	0.928684	14.6439	0.899666	15.6974	55.1909	7.91357
Q2QYL2	Non-specific lipid-transfer protein 2B OS=Oryza sativa subsp. japonica GN=LTP2-B PE=2 SV=1 - [NLT2B_ORYSJ]	62.39	2			transport	Pf00234	0.862451	9.04924	0.995842	37.917	1.02738	24.4545	0.97831	13.0735	0.980492	19.0027	0.992248	11.5519	11.4367	8.52881
Q75M08	Protein disulfide isomerase-like 2-1 OS=Oryza sativa subsp. japonica GN=PDIL2-1 PE=2 SV=2 - [PDI21_ORYSJ]	31.69	5	catalytic activity	cytoplasm; endoplasmic reticulum; extracellular	cellular homeostasis; metabolic process; regulation of biological process	Pf00085; Pf07749	0.900461	8.47637	0.808492	10.1617	0.84244	6.90716	1.02504	9.1601	1.03005	9.11076	0.976076	8.42388	39.8875	6.99072
B8B0N6	Putative uncharacterized protein OS=Oryza sativa subsp. indica GN=OsI_22585 PE=3 SV=1 - [B8B0N6_ORYSI]	18.47	1	catalytic activity	membrane	metabolic process	Pf00201	1.27505		1.21226		1.29892		1.01606		0.965551		0.963873		49.4034	6.07471
Q851M7	Serine/threonine-protein kinase OS=Oryza sativa subsp. japonica GN=OSJNBa0042I09.17 PE=2 SV=1 - [Q851M7_ORYSJ]	16.08	12	catalytic activity; nucleotide binding	membrane	cell communication; metabolic process; reproduction	Pf00069; Pf00954; Pf01453; Pf07714; Pf08276	0.946818	9.77772	0.908777	8.3527	0.908034	13.139	0.991373	10.2679	0.996749	15.1306	0.962157	10.9582	91.7134	7.6499
Q6AV23	Putative TCP-1/cpn60 chaperonin family protein OS=Oryza sativa subsp. japonica GN=OSJNBa0063J18.19 PE=2 SV=1 - [Q6AV23_ORYSJ]	20.95	1	nucleotide binding; protein binding	cytoplasm; membrane	metabolic process	Pf00118	0.975817	0.0499377	0.972878	4.2596	1.02257	3.68924	0.914288	1.45647	0.971135	4.17923	0.956669	4.47897	57.1928	5.8208
B8AWH0	Putative uncharacterized protein OS=Oryza sativa subsp. indica GN=OsI_20931 PE=3 SV=1 - [B8AWH0_ORYSI]	20.91	1	nucleotide binding; protein binding	cytoplasm; membrane	metabolic process	Pf00118	1.08675		1.08983		1.09735		0.999147		1.00333		1.05212		57.1676	5.73193
Q10NC7	Os03g0274000 protein OS=Oryza sativa subsp. japonica GN=Os03g0274000 PE=3 SV=1 - [Q10NC7_ORYSJ]	9.72	4		cytoplasm; endoplasmic reticulum	reproduction	Pf01237	0.990167	8.30981	0.896406	4.41246	0.913924	8.89437	0.914611	10.256	0.902524	10.8829	0.939315	7.09686	51.7732	5.47803
Q75M17	Os05g0105100 protein OS=Oryza sativa subsp. japonica GN=P0668H12.20 PE=2 SV=1 - [Q75M17_ORYSJ]	41.82	5	nucleotide binding	cytoplasm; endosome; membrane; nucleus	cell communication; cell division; regulation of biological process; response to stimulus; transport	Pf00025; Pf00071; Pf04670; Pf05783; Pf08477	0.821928	15.4288	0.857079	15.6822	0.83339	36.0837	1.05127	16.1902	1.04524	14.3404	1.09764	17.1728	23.9873	6.56592
Q69IN5	Putative Pto kinase interactor 1 OS=Oryza sativa subsp. japonica GN=P0450E05.10 PE=3 SV=1 - [Q69IN5_ORYSJ]	33.33	7	catalytic activity; nucleotide binding	membrane	metabolic process	Pf00069; Pf07714	0.931811	15.2611	1.03957	20.7012	0.915018	19.3135	1.11909	12.519	1.01214	11.8047	1.01291	13.6297	41.5031	6.34131
Q8RZQ8	Bidirectional sugar transporter SWEET1a OS=Oryza sativa subsp. japonica GN=SWEET1A PE=2 SV=1 - [SWT1A_ORYSJ]	16.48	4	transporter activity	cytoplasm; membrane	transport	Pf03083	0.811516	9.20207	0.893024	18.0924	0.85965	14.7755	1.21311	15.7147	1.21343	9.3103	1.16616	16.259	29.4835	8.30908
B8BBQ1	Putative uncharacterized protein OS=Oryza sativa subsp. indica GN=OsI_28200 PE=4 SV=1 - [B8BBQ1_ORYSI]	10.24	4	catalytic activity; nucleotide binding	membrane	metabolic process	Pf00069; Pf01636; Pf07714; Pf11721; Pf12819	0.830852	9.1761	0.783224	10.8356	0.818207	20.6498	1.1009	4.07867	1.10992	8.28476	1.06165	7.09427	118.461	7.25439
Q9AQZ5	70 kDa heat shock protein OS=Oryza sativa subsp. japonica GN=OJ1174_D05.17 PE=2 SV=1 - [Q9AQZ5_ORYSJ]	24.02	15	nucleotide binding	membrane	response to stimulus	Pf00012	1.01809	6.18765	0.988135	11.1338	0.999479	9.63006	1.02195	5.97333	0.975311	9.90339	0.987836	10.6839	93.0489	5.2749
Q84QV5	Os08g0525700 protein OS=Oryza sativa subsp. japonica GN=OJ1191_A10.120 PE=4 SV=1 - [Q84QV5_ORYSJ]	7.5	6					0.950632	17.8808	1.05483	28.9302	1.0058	40.4708	1.08832	14.4128	1.06517	13.1308	1.10413	22.5985	113.387	4.52588
Q53NG8	Aldehyde dehydrogenase OS=Oryza sativa subsp. japonica GN=Os11g0186200 PE=2 SV=1 - [Q53NG8_ORYSJ]	18.88	8	catalytic activity	cytoplasm; endoplasmic reticulum; membrane; vacuole	metabolic process; response to stimulus	Pf00171	0.898474	8.80324	0.834687	10.0624	0.856466	13.3096	1.04032	8.82723	1.06829	9.10723	1.01392	8.55747	52.4808	8.17725
A2WXV8	Fructokinase-1 OS=Oryza sativa subsp. indica GN=FRK1 PE=1 SV=1 - [SCRK1_ORYSI]	31.89	9	catalytic activity; nucleotide binding	cytoplasm	metabolic process	Pf00294	1.0801	7.17003	1.00058	12.1101	1.00475	12.6773	0.867862	12.4604	0.916995	19.052	0.88792	17.1958	34.707	5.2749
B9EW46	Putative uncharacterized protein OS=Oryza sativa subsp. japonica GN=OsJ_01540 PE=3 SV=1 - [B9EW46_ORYSJ]	21.53	3	catalytic activity; nucleotide binding	membrane; nucleus; organelle lumen	metabolic process; response to stimulus	Pf00438; Pf02772; Pf02773	0.945038	3.59013	0.95244	3.15932	1.01777	16.826	0.938871	10.5994	0.991746	2.76047	0.97064	4.90678	38.3884	6.03662
B9G5W2	Putative uncharacterized protein OS=Oryza sativa subsp. japonica GN=OsJ_31638 PE=4 SV=1 - [B9G5W2_ORYSJ]	4.87	2	catalytic activity; nucleotide binding	membrane	metabolic process; regulation of biological process	Pf02525; Pf03358; Pf03735	0.926414	13.1408	0.910594	8.208	0.894045	28.6046	0.983314	8.23728	1.01843	6.25233	0.966598	9.99421	82.7501	8.73389
A2YNW1	Putative uncharacterized protein OS=Oryza sativa subsp. indica GN=OsI_26938 PE=4 SV=1 - [A2YNW1_ORYSI]	19.51	2		cytoplasm	transport		1.23799	15.9042	1.45153	20.3674	1.08954	17.5805	1.22771	17.7017	0.905478	15.2614	0.891306	18.5187	11.7478	8.06006
Q8H3F6	Putative uncharacterized protein OSJNBb0056I06.118 OS=Oryza sativa subsp. japonica GN=OSJNBb0056I06.118 PE=4 SV=1 - [Q8H3F6_ORYSJ]	30.05	5		membrane			0.986023	5.72236	1.04024	8.13195	1.04786	9.79604	1.07429	5.91694	1.10509	11.3941	1.11001	8.28116	22.7778	8.44092
B8A7Q9	Putative uncharacterized protein OS=Oryza sativa subsp. indica GN=OsI_04798 PE=3 SV=1 - [B8A7Q9_ORYSI]	14.36	1	catalytic activity; nucleotide binding	membrane	metabolic process	Pf00069; Pf07714	0.997454		0.778087		1.13436		0.850658		1.00711		1.10163		40.4737	6.85889
Q0D715	Os07g0409900 protein OS=Oryza sativa subsp. japonica GN=Os07g0409900 PE=2 SV=1 - [Q0D715_ORYSJ]	9.18	2	catalytic activity; metal ion binding; nucleotide binding	extracellular; membrane	cell communication; metabolic process; regulation of biological process; response to stimulus	Pf00036; Pf00069; Pf07714; Pf10591	1.14251	4.91021	1.1963	14.8887	1.16966	6.69898	1.04312	9.87765	1.05955	10.7522	1.07324	12.1627	57.5486	7.78174
Q7X6D9	OSJNBa0058K23.5 protein OS=Oryza sativa subsp. japonica GN=OSJNBa0093O08.15 PE=4 SV=2 - [Q7X6D9_ORYSJ]	27.85	7	protein binding	membrane	transport		0.982222	8.72099	0.939183	9.79009	0.961954	8.03962	1.01169	9.50564	1.05013	11.1583	0.96875	9.13553	33.1261	5.17334
Q6ASU8	Putative translational activator OS=Oryza sativa subsp. japonica GN=B1377B10.19 PE=4 SV=1 - [Q6ASU8_ORYSJ]	5.03	11	protein binding	cytoplasm; membrane	transport	Pf12074	0.983952	15.1899	0.880623	18.052	0.979998	15.4862	0.989371	7.79139	1.03883	11.1586	0.994467	14.8843	281.962	7.21045
Q6K489	Os09g0248100 protein OS=Oryza sativa subsp. japonica GN=OJ1695_A02.4 PE=2 SV=1 - [Q6K489_ORYSJ]	24.19	7		cytoplasm; membrane		Pf02469	0.912395	14.1604	0.89234	13.498	0.855614	13.5128	1.12386	9.87723	1.08491	9.46603	1.09072	9.40821	42.3999	7.95752
A3A4E0	Os02g0208500 protein OS=Oryza sativa subsp. japonica GN=Os02g0208500 PE=4 SV=1 - [A3A4E0_ORYSJ]	13.33	1					0.952057	6.0731	0.977812	8.91547	0.948552	6.60375	1.00872	5.40761	0.979077	5.47631	0.96226	6.51184	6.96883	5.73193
Q9AUQ4	Os03g0712700 protein OS=Oryza sativa subsp. japonica GN=OSJNBb0033N16.5 PE=2 SV=1 - [Q9AUQ4_ORYSJ]	29.21	14	catalytic activity; metal ion binding	cytoplasm; cytosol; membrane; nucleus	development; metabolic process; response to stimulus	Pf00408; Pf02878; Pf02879; Pf02880	1.05138	10.0861	1.01886	20.0524	1.01726	16.761	0.930042	10.2637	0.921885	7.1901	0.889185	11.7031	62.9097	5.63037
Q40680	Elongation factor 1-delta 1 OS=Oryza sativa subsp. japonica GN=Os07g0614500 PE=2 SV=3 - [EF1D1_ORYSJ]	33.19	4	RNA binding	cytoplasm; membrane	metabolic process; response to stimulus	Pf00736	0.979313	7.35465	0.932154	9.4481	0.946258	9.8316	0.979831	10.1133	0.981956	12.7635	0.952953	11.7364	24.8473	4.52588
P49027	Guanine nucleotide-binding protein subunit beta-like protein A OS=Oryza sativa subsp. japonica GN=RACK1A PE=1 SV=1 - [GBLPA_ORYSJ]	19.76	3	protein binding; signal transducer activity	cytoplasm; cytosol; membrane; nucleus; organelle lumen; ribosome	cell communication; defense response; development; metabolic process; regulation of biological process; response to stimulus	Pf00400	0.982973	7.39498	0.922196	6.92705	0.945104	8.93365	0.99054	6.82567	1.03184	7.36847	1.00129	6.93142	36.209	6.44287
Q69X21	Phospholipase D OS=Oryza sativa subsp. japonica GN=P0481H08.3 PE=3 SV=1 - [Q69X21_ORYSJ]	8.19	1	catalytic activity; metal ion binding; protein binding	membrane	metabolic process	Pf00168; Pf00614; Pf12357	1.64886		2.33283		1.98652		1.54125		0.982416		1.37802		93.1775	6.354
P49100	Cytochrome b5 OS=Oryza sativa subsp. japonica GN=Os05g0108800 PE=2 SV=2 - [CYB5_ORYSJ]	48.91	3	metal ion binding	cytoplasm; endoplasmic reticulum; membrane	defense response; metabolic process; response to stimulus; transport	Pf00173	0.929611	9.72884	0.934909	9.56235	0.912593	5.41533	1.13136	4.40911	1.06567	6.10632	1.02686	3.86291	15.2727	5.32568
Q69UI1	40S ribosomal protein S13-2 OS=Oryza sativa subsp. japonica GN=Os08g0117300 PE=1 SV=1 - [RS132_ORYSJ]	35.76	5	structural molecule activity	cytoplasm; cytosol; membrane; nucleus; organelle lumen; ribosome	cell differentiation; cell division; cell organization and biogenesis; development; metabolic process	Pf00312; Pf08069	0.924673	7.73311	0.861946	11.4906	0.850453	13.5011	0.981355	8.51145	1.02099	5.5139	0.961119	6.38582	17.1345	10.5356
B9F3C7	Putative uncharacterized protein OS=Oryza sativa subsp. japonica GN=OsJ_05593 PE=3 SV=1 - [B9F3C7_ORYSJ]	7.01	2	catalytic activity; metal ion binding; nucleotide binding; protein binding; transporter activity	membrane	metabolic process; transport	Pf00122; Pf00689; Pf00702; Pf08282; Pf12515; Pf12710	0.915101	11.4174	0.976071	26.8468	0.917885	15.3637	1.00314	6.54069	1.03435	12.5241	1.08981	7.3214	110.575	7.1958
Q5JLP6	Os01g0939700 protein OS=Oryza sativa subsp. japonica GN=B1150F11.18-1 PE=2 SV=1 - [Q5JLP6_ORYSJ]	15.75	4	catalytic activity	cytoplasm		Pf00756; Pf01738; Pf12697	1.10337	6.98944	1.26488	11.8227	1.14989	7.0726	1.00543	6.55174	0.990299	8.76111	0.988301	9.33162	32.161	7.78174
B8ASU6	T-complex protein 1 subunit alpha OS=Oryza sativa subsp. indica GN=OsI_16908 PE=3 SV=1 - [B8ASU6_ORYSI]	13.58	7	nucleotide binding; protein binding	cytoplasm; membrane	metabolic process	Pf00118	0.974414	9.55507	0.916947	10.642	0.930988	11.3072	0.964247	11.9957	0.957489	10.2705	0.926243	8.67269	59.1812	6.21436
Q5VRF6	Os06g0168500 protein OS=Oryza sativa subsp. japonica GN=OSJNBa0033B09.18 PE=3 SV=1 - [Q5VRF6_ORYSJ]	23.93	8	protein binding	membrane	response to stimulus; transport	Pf00804; Pf05739	0.952115	6.52682	0.927694	9.32617	0.966299	9.04142	0.981428	7.13584	1.02315	8.01748	0.982104	8.85853	34.6274	6.84424
A2Y449	Annexin OS=Oryza sativa subsp. indica GN=OsI_19780 PE=3 SV=1 - [A2Y449_ORYSI]	24.77	7	metal ion binding			Pf00191	0.939642	9.03629	1.00411	10.755	0.930024	7.46635	0.987776	5.33085	1.02118	5.26281	1.0043	5.49849	35.3292	5.88428
Q9ZP20	Thioredoxin M5, chloroplastic OS=Oryza sativa subsp. japonica GN=TRXM PE=2 SV=1 - [TRXM5_ORYSJ]	20.93	3	catalytic activity	cytoplasm	cell organization and biogenesis; cellular homeostasis; metabolic process; regulation of biological process; response to stimulus; transport	Pf00085	0.821912	14.6119	0.635493	27.2949	0.660776	26.9798	0.800396	15.9661	0.798406	23.342	0.835177	20.8774	18.5174	7.92822
B8A9Z2	Putative uncharacterized protein OS=Oryza sativa subsp. indica GN=OsI_05426 PE=4 SV=1 - [B8A9Z2_ORYSI]	5.07	2	catalytic activity; nucleotide binding; transporter activity	membrane	metabolic process; transport	Pf00005; Pf00664; Pf03164	0.937519	6.3176	0.872123	31.2722	0.886352	27.4713	1.04854	7.10474	0.990818	16.8828	0.965973	20.444	192.462	6.66846
Q7XC37	Nucleoside diphosphate kinase OS=Oryza sativa subsp. japonica GN=OSJNBa0027P10.4 PE=2 SV=1 - [Q7XC37_ORYSJ]	31.79	5	catalytic activity; nucleotide binding	cytoplasm; extracellular; membrane; vacuole	metabolic process; response to stimulus	Pf00334	1.04746	9.87678	1.1487	26.0291	1.07318	17.337	1.03527	17.7465	0.953395	5.51115	0.978086	15.2426	16.7688	7.50342
B8A8C9	Phospholipase A1-II 5 OS=Oryza sativa subsp. indica GN=OsI_03470 PE=3 SV=1 - [PLA5_ORYSI]	18.49	8	catalytic activity	cytoplasm; membrane	metabolic process	Pf01764; Pf12697	0.974523	8.23625	0.955065	8.84011	0.957138	9.37763	0.978347	6.75344	0.996878	6.67918	0.974164	7.99541	50.3625	6.97607
B7F9R7	Ribosomal protein OS=Oryza sativa subsp. japonica PE=2 SV=1 - [B7F9R7_ORYSJ]	25.93	1	RNA binding; structural molecule activity	cytoplasm; cytosol; membrane; nucleus; organelle lumen; ribosome	development; metabolic process	Pf00687	0.978018	5.07957	0.80038	4.93794	0.813825	2.70769	1.02132	2.9647	1.01241	5.16932	1.01257	9.02298	24.6092	9.81787
B7EAG5	cDNA clone:J013001N20, full insert sequence OS=Oryza sativa subsp. japonica PE=2 SV=1 - [B7EAG5_ORYSJ]	7.16	1		membrane			1.04759	11.5787	1.13198	6.04132	1.05614	7.8288	1.00363	14.3262	0.944954	19.7823	0.972481	13.6576	38.8373	6.91748
Q0E1D7	Flowering-promoting factor 1-like protein 3 OS=Oryza sativa subsp. japonica GN=Os02g0460200 PE=2 SV=1 - [FLP3_ORYSJ]	34.43	3					1.26634	21.4372	1.59625	12.7128	1.23382	27.3601	1.09248	15.7367	1.00426	35.4932	0.885621	38.8785	13.5701	8.80713
Q7XJ39	Non-specific lipid-transfer protein 2A OS=Oryza sativa subsp. japonica GN=LTP2-A PE=3 SV=2 - [NLT2A_ORYSJ]	61.02	1			transport	Pf00234	1.01956	28.0095	1.29494	39.5012	1.06799	53.3398	1.26142	8.59567	1.01031	2.07724	1.24634	15.1771	11.4937	8.52881
P37833	Aspartate aminotransferase, cytoplasmic OS=Oryza sativa subsp. japonica GN=Os01g0760600 PE=2 SV=1 - [AATC_ORYSJ]	23.1	10	catalytic activity; metal ion binding	cytoplasm; cytosol; membrane	development; metabolic process	Pf00155	1.00905	6.26161	0.958825	14.2443	0.97095	11.0723	0.930393	6.50101	0.962417	9.846	0.933155	7.65661	44.4788	7.94287
Q0DKF1	Thioredoxin H4-2 OS=Oryza sativa subsp. japonica GN=Os05g0169000 PE=2 SV=1 - [TRH42_ORYSJ]	31.06	2	catalytic activity	cytoplasm	cellular homeostasis; metabolic process; regulation of biological process; transport	Pf00085; Pf06110	0.911667	7.57814	0.872616	5.5508	0.854569	8.71263	0.982181	9.57456	1.01954	5.48528	0.970844	4.54585	14.8054	6.01123
Q5KQH5	'putative 2,3-bisphosphoglycerate-independent phosphoglycerate mutase' OS=Oryza sativa subsp. japonica GN=OSJNBa0095J22.15 PE=4 SV=1 - [Q5KQH5_ORYSJ]	15.21	2	catalytic activity; metal ion binding	cytoplasm; cytosol; extracellular; membrane; mitochondrion	metabolic process; response to stimulus	Pf01676; Pf06415	0.933505	2.07288	0.90611	5.42852	0.871795	0.409911	0.956139	1.17699	1.00029	0.793785	0.894857	0.237134	60.7748	5.47803
Q5JLU1	Os01g0714900 protein OS=Oryza sativa subsp. japonica GN=B1131B07.11 PE=2 SV=1 - [Q5JLU1_ORYSJ]	35.75	5	nucleotide binding	cytoplasm; membrane; mitochondrion; nucleus	cell communication; regulation of biological process; response to stimulus; transport	Pf00025; Pf00071; Pf04670; Pf08477	0.859436	5.51656	0.79691	5.89667	0.834948	8.59645	1.00649	7.71403	1.00243	14.0942	1.02025	5.74604	23.2466	5.98584
Q7G649	Expressed protein OS=Oryza sativa subsp. japonica GN=OSJNAb0008A05.8 PE=2 SV=1 - [Q7G649_ORYSJ]	53.33	7					1.11102	13.3013	1.12029	13.1322	1.04386	10.6156	0.886174	16.1257	0.868773	14.9189	0.847964	9.68445	16.512	4.77979
A3REN3	Catalase OS=Oryza sativa subsp. indica GN=CatA PE=2 SV=2 - [A3REN3_ORYSI]	23.78	8	antioxidant activity; catalytic activity; metal ion binding		metabolic process; response to stimulus	Pf00199; Pf06628	0.937336	13.9403	0.913817	18.0734	0.917467	16.521	1.08448	8.3405	1.0864	12.1197	1.06796	7.07168	56.6812	7.09326
Q942L2	Protein disulfide isomerase-like 2-2 OS=Oryza sativa subsp. japonica GN=PDIL2-2 PE=2 SV=1 - [PDI22_ORYSJ]	31.27	6	catalytic activity	cytoplasm; endoplasmic reticulum; extracellular	cellular homeostasis; metabolic process; regulation of biological process	Pf00085; Pf07749	0.928336	7.12343	0.856214	8.22088	0.879797	10.3806	0.961433	7.72762	1.00548	5.2024	0.986322	9.21309	40.7149	6.87354
A2Y6J2	Putative uncharacterized protein OS=Oryza sativa subsp. indica GN=OsI_20633 PE=3 SV=1 - [A2Y6J2_ORYSI]	33.64	1	nucleotide binding	cytoplasm; membrane; vacuole	cell communication; regulation of biological process; response to stimulus; transport	Pf00025; Pf00071; Pf08477	0.803398		0.787766		0.835164		1.13401		1.1719		1.17591		24.1151	5.36377
P42863	Glucose-6-phosphate isomerase, cytosolic B OS=Oryza sativa subsp. japonica GN=Os06g0256500 PE=2 SV=2 - [G6PIB_ORYSJ]	17.99	3	catalytic activity	cytoplasm; cytosol	defense response; metabolic process; response to stimulus	Pf00342	1.10612	4.54277	0.920738	12.3918	1.01568	12.4223	0.930159	4.98488	0.985815	6.26702	1.00294	1.45719	62.3291	6.93213
Q654U8	Os06g0247500 protein OS=Oryza sativa subsp. japonica GN=OJ1136_C11.21 PE=4 SV=1 - [Q654U8_ORYSJ]	15.17	7	catalytic activity; nucleotide binding	cytoplasm; cytosol; membrane	development; metabolic process; reproduction; response to stimulus	Pf00365	0.962867	4.8663	1.00445	8.56056	0.92414	8.17967	0.954919	5.54432	0.903574	10.4727	0.895424	10.9374	61.223	6.41748
Q6ER67	Ribosomal protein OS=Oryza sativa subsp. japonica GN=OSJNBa0073A18.28 PE=2 SV=1 - [Q6ER67_ORYSJ]	25.93	1	RNA binding; structural molecule activity	cytoplasm; cytosol; membrane; nucleus; organelle lumen; ribosome	development; metabolic process	Pf00687	1.04454	25.6424	1.04232	40.8645	0.963309	24.0946	0.953035	16.3905	1.08395	8.55029	1.11285	31.4694	24.6242	9.78857
Q852B4	Os03g0823700 protein OS=Oryza sativa subsp. japonica GN=OSJNBb0081B07.10 PE=2 SV=1 - [Q852B4_ORYSJ]	35.35	4	nucleotide binding	cytoplasm; endosome; membrane	cell communication; regulation of biological process; response to stimulus; transport	Pf00025; Pf00071; Pf08477	0.923174	1.1489	0.850948	8.66024	0.830224	3.98184	0.97896	4.14849	1.04163	4.835	0.92221	3.54764	23.7892	6.55127
B9G4P8	Putative uncharacterized protein OS=Oryza sativa subsp. japonica GN=OsJ_30100 PE=3 SV=1 - [B9G4P8_ORYSJ]	13.28	6	catalytic activity; metal ion binding	membrane	metabolic process	Pf00067	1.00282	8.19083	1.05324	7.3688	1.03291	11.6548	0.917374	13.3932	0.922306	7.6794	0.931917	17.1934	53.9305	9.18799
Q6VEF1	Monosaccharide transporter 6 OS=Oryza sativa subsp. japonica GN=MST6 PE=2 SV=1 - [Q6VEF1_ORYSJ]	8.88	3	transporter activity	cytoplasm; membrane; nucleus; vacuole	response to stimulus; transport	Pf00083; Pf07690	0.930642	5.92384	0.820722	14.897	0.94991	9.4787	0.973905	14.0856	1.07547	14.4074	1.00447	11.7421	57.5182	9.24658
Q75L87	Putative uncharacterized protein OJ1729_E02.7 OS=Oryza sativa subsp. japonica GN=OJ1729_E02.7 PE=4 SV=2 - [Q75L87_ORYSJ]	24.15	7		cytoplasm; membrane		Pf00335	0.97622	6.8009	0.918161	8.03193	0.867723	7.30881	0.973904	7.93338	0.98124	7.502	0.975441	4.86045	32.8607	8.82178
Q5W6F1	Cinnamate-4-hydroxylase OS=Oryza sativa subsp. japonica GN=OSJNBb0006B22.11 PE=2 SV=1 - [Q5W6F1_ORYSJ]	19.4	9	catalytic activity; metal ion binding	cytoplasm	metabolic process	Pf00067	1.11084	12.1754	1.19218	28.1563	1.09459	14.4695	0.96772	15.6721	0.885355	13.3854	0.913824	16.6489	56.847	8.89502
Q852G4	EF hand family protein, expressed OS=Oryza sativa subsp. japonica GN=Os03g0411300 PE=2 SV=1 - [Q852G4_ORYSJ]	22.78	3	metal ion binding				1.07699	8.04736	0.930123	15.7024	1.06946	15.0763	0.879968	11.8792	0.838099	11.7827	0.85227	11.3131	16.5181	4.4624
B9EXE9	Putative uncharacterized protein OS=Oryza sativa subsp. japonica GN=OsJ_02139 PE=4 SV=1 - [B9EXE9_ORYSJ]	26.1	6			metabolic process	Pf02502; Pf07883	1.01828	9.6335	1.01418	20.524	1.00332	14.7291	0.855839	11.4825	0.878736	9.30091	0.833663	8.69706	28.9794	6.11279
Q94J09	GTP-binding protein GTP1 OS=Oryza sativa subsp. japonica GN=P0481E12.49-1 PE=2 SV=1 - [Q94J09_ORYSJ]	29.86	1	nucleotide binding	cytoplasm; membrane; vacuole	cell communication; regulation of biological process; response to stimulus; transport	Pf00025; Pf00071; Pf08477	0.830188	4.5035	0.756504	8.76648	0.789494	11.8956	1.07041	2.27964	1.06822	0.840759	1.01343	3.97638	24.1782	5.36377
P35686	40S ribosomal protein S20 OS=Oryza sativa subsp. japonica GN=RPS20 PE=2 SV=2 - [RS20_ORYSJ]	34.38	2	RNA binding; structural molecule activity	cytoplasm; cytosol; membrane; nucleus; organelle lumen; ribosome	metabolic process	Pf00338	0.972571	6.02145	0.954799	9.46619	0.939217	5.46679	0.956644	4.87386	1.01316	8.52795	0.93893	6.68007	14.0375	9.43701
Q8W315	Dynamin-related protein 1C, putative, expressed OS=Oryza sativa subsp. japonica GN=OSJNBa0014G15.4 PE=2 SV=1 - [Q8W315_ORYSJ]	17.68	5	catalytic activity; nucleotide binding	cytoplasm; membrane	cell organization and biogenesis; development; metabolic process	Pf00350; Pf01031; Pf02212	1.06709	13.271	1.28606	15.2727	1.11797	11.1072	1.05541	4.7215	1.04381	9.06249	1.05837	7.85106	67.9886	8.30908
Q1H9B9	S-adenosylmethionine synthase (Fragment) OS=Oryza sativa GN=sams PE=3 SV=1 - [Q1H9B9_ORYSA]	12.34	2	catalytic activity; metal ion binding; nucleotide binding	membrane; nucleus; organelle lumen	metabolic process; response to stimulus	Pf00438; Pf02772; Pf02773	1.04328	9.48773	1.15396	9.76379	1.14657	12.4988	0.92342	5.23825	0.912508	11.6971	1.0001	13.9549	42.5085	6.13818
A2Z3J5	Putative uncharacterized protein OS=Oryza sativa subsp. indica GN=OsI_32201 PE=4 SV=1 - [A2Z3J5_ORYSI]	11.32	5	protein binding	cytoplasm; endosome; membrane; vacuole	cell organization and biogenesis; reproduction; response to stimulus; transport	Pf00168	0.88667	9.74303	0.869624	10.3764	0.867126	20.048	1.0373	23.1794	0.991983	8.50159	0.93754	16.037	61.3923	6.75635
Q6H547	Os02g0523500 protein OS=Oryza sativa subsp. japonica GN=OSJNBa0047A17.32 PE=4 SV=1 - [Q6H547_ORYSJ]	14.1	13	catalytic activity	cytoplasm; cytosol; endoplasmic reticulum; membrane; nucleus	development; metabolic process; regulation of biological process; response to stimulus; transport	Pf00565; Pf00567	0.977504	8.86529	0.916781	13.972	0.984045	11.0184	0.985427	9.00237	0.975984	5.63775	0.955394	8.22459	108.115	6.88818
B7EHA8	cDNA clone:J023045B01, full insert sequence OS=Oryza sativa subsp. japonica PE=2 SV=1 - [B7EHA8_ORYSJ]	15.01	4	transporter activity	membrane	response to stimulus; transport	Pf00854	1.15959	15.3414	1.16517	16.7035	1.17448	23.6591	0.870595	23.798	0.814759	10.3254	0.866105	12.6834	49.3959	9.31982
Q7XAN4	Os07g0663800 protein OS=Oryza sativa subsp. japonica GN=OJ1343_D04.115 PE=2 SV=1 - [Q7XAN4_ORYSJ]	23.33	6	catalytic activity; nucleotide binding		metabolic process	Pf00106; Pf01370; Pf08659	1.08282	13.3688	1.12206	27.6854	0.991079	13.0753	1.00426	7.58869	0.96157	7.33254	0.956829	6.53019	28.2673	6.27783
Q8GRK9	Os03g0402000 protein OS=Oryza sativa subsp. japonica GN=P0524G08.123 PE=2 SV=1 - [Q8GRK9_ORYSJ]	35.29	6				Pf04051	0.950008	3.13114	0.836152	10.0312	0.884229	8.97417	0.918952	8.23072	1.00302	7.92975	0.964932	9.09609	20.9123	4.51318
B9F4P8	Putative uncharacterized protein OS=Oryza sativa subsp. japonica GN=OsJ_09005 PE=4 SV=1 - [B9F4P8_ORYSJ]	4.22	5	catalytic activity	membrane	metabolic process	Pf02364; Pf03772; Pf04652	1.00772	13.381	0.893446	23.1629	0.964116	31.0211	1.03053	10.7461	1.07799	14.288	1.06013	17.8553	220.438	9.12939
A2Z1P2	Putative uncharacterized protein OS=Oryza sativa subsp. indica GN=OsI_31526 PE=3 SV=1 - [A2Z1P2_ORYSI]	26.29	10	catalytic activity		metabolic process; response to stimulus	Pf00171	0.989336	11.7868	0.901807	11.7901	0.911454	9.65105	0.951484	13.5412	0.980165	9.62891	0.937814	5.988	49.8577	6.771
Q0JAC6	Os04g0605900 protein OS=Oryza sativa subsp. japonica GN=Os04g0605900 PE=2 SV=1 - [Q0JAC6_ORYSJ]	37.3	3	structural molecule activity	cytoplasm; cytosol; membrane; nucleus; organelle lumen; ribosome; vacuole	metabolic process	Pf00327; Pf08079	0.909471	5.2288	0.834289	9.46893	0.824838	4.50928	1.02857	5.30425	1.06212	5.89773	0.995279	6.44279	28.3435	10.0376
Q8W3J0	Os03g0278000 protein OS=Oryza sativa subsp. japonica GN=UXS-3 PE=2 SV=1 - [Q8W3J0_ORYSJ]	22.86	6	catalytic activity; nucleotide binding	membrane	metabolic process	Pf01073; Pf01370; Pf02719; Pf04321; Pf07993	0.973509	7.36497	0.947724	7.33175	0.916652	9.41284	0.988565	8.31583	1.01365	7.06844	0.966511	6.57583	39.2842	7.60596
Q6YYR2	Os08g0234000 protein OS=Oryza sativa subsp. japonica GN=B1047A05.37 PE=2 SV=1 - [Q6YYR2_ORYSJ]	37.55	3	structural molecule activity	cytoplasm; cytosol; membrane; nucleus; organelle lumen; ribosome; vacuole	metabolic process	Pf00327; Pf08079	0.926453	13.3304	0.896838	28.2485	0.897428	29.9745	1.10069	8.42734	1.0268	6.84159	0.948076	6.22111	28.4356	10.0522
B8BE47	Putative uncharacterized protein OS=Oryza sativa subsp. indica GN=OsI_32280 PE=4 SV=1 - [B8BE47_ORYSI]	9.76	3			metabolic process	Pf01476	0.833047	25.3313	0.835482	25.2053	0.924609	30.7211	1.19382	7.96957	1.20255	15.2493	1.21995	13.9299	38.2871	7.88428
Q0E2I8	Os02g0235600 protein OS=Oryza sativa subsp. japonica GN=Os02g0235600 PE=2 SV=1 - [Q0E2I8_ORYSJ]	21.98	1	structural molecule activity	cytoplasm; ribosome	metabolic process	Pf00281; Pf00673	1.01995		0.857116		0.874159		0.934455		0.995676		0.910572		20.8229	9.92041
Q0J0T7	Os09g0484200 protein OS=Oryza sativa subsp. japonica GN=Os09g0484200 PE=2 SV=1 - [Q0J0T7_ORYSJ]	37.33	3					1.06922	9.54911	0.954504	38.8895	1.08909	21.2881	1.11673	32.2162	0.989328	30.9194	0.992855	28.1196	15.0962	3.75146
B8B8M4	Putative uncharacterized protein OS=Oryza sativa subsp. indica GN=OsI_26905 PE=4 SV=1 - [B8B8M4_ORYSI]	22.73	5		membrane		Pf02893	0.980624	8.71746	0.900191	9.81987	0.993494	14.5607	0.966773	13.0481	0.996995	8.69491	0.984637	9.81316	32.6286	7.23975
Q10LT8	Os03g0335300 protein OS=Oryza sativa subsp. japonica GN=Os03g0335300 PE=2 SV=1 - [Q10LT8_ORYSJ]	14.65	7	metal ion binding	cytoplasm; Golgi; membrane	transport	Pf02225	0.930915	8.18717	0.936585	23.4998	0.906705	14.4968	0.959369	2.9835	0.989297	2.66305	1.0282	12.4301	69.9365	5.65576
Q2QS13	UDP-glucose 6-dehydrogenase OS=Oryza sativa subsp. japonica GN=LOC_Os12g25700 PE=2 SV=1 - [Q2QS13_ORYSJ]	20	8	catalytic activity; nucleotide binding	cytoplasm; cytosol; nucleus	metabolic process	Pf00984; Pf03720; Pf03721	1.01868	9.67885	0.970334	11.648	0.987736	9.29743	0.981759	7.491	0.986846	6.98788	0.965829	7.80199	52.8852	6.12549
Q6F3B4	Os03g0787000 protein OS=Oryza sativa subsp. japonica GN=OSJNBb0024J04.6 PE=2 SV=1 - [Q6F3B4_ORYSJ]	30.91	8	protein binding	membrane	transport	Pf00804; Pf05739	1.00368	13.1528	1.01611	17.1746	0.994446	12.79	0.9528	7.16071	0.96908	8.55685	0.945227	6.7046	35.5895	7.54736
Q5SNH7	Os01g0191100 protein OS=Oryza sativa subsp. japonica GN=P0710E05.27 PE=4 SV=1 - [Q5SNH7_ORYSJ]	46.49	3	structural molecule activity	cytoplasm; ribosome	metabolic process	Pf00428	0.89085	10.5271	0.800296	10.163	0.827939	5.48367	0.983954	11.1261	1.04468	11.2572	0.936364	9.7159	11.5996	4.32275
Q2RAK2	Pyruvate kinase OS=Oryza sativa subsp. japonica GN=Os11g0148500 PE=2 SV=1 - [Q2RAK2_ORYSJ]	33.21	3	catalytic activity; metal ion binding	membrane	metabolic process; response to stimulus	Pf00224; Pf02887	1.02107	5.71891	1.08794	20.0192	1.10898	8.90704	0.944219	13.0186	0.901347	26.0825	0.957527	17.6501	57.284	6.75635
Q7XMK3	Probable ascorbate-specific transmembrane electron transporter 2 OS=Oryza sativa subsp. japonica GN=Os04g0533500 PE=2 SV=2 - [ACET2_ORYSJ]	8.9	1	catalytic activity; metal ion binding	cytoplasm; membrane; vacuole	metabolic process; transport	Pf03188	0.932542		0.783666		0.769086		0.935081		0.929479		0.890579		25.3386	7.31299
Q94DH6	Os01g0971500 protein OS=Oryza sativa subsp. japonica GN=P0518C01.12 PE=2 SV=1 - [Q94DH6_ORYSJ]	31.85	1	metal ion binding	cytoplasm; endoplasmic reticulum	defense response; metabolic process; response to stimulus	Pf00173	0.838986		0.824565		0.786122		1.00888		1.03341		1.04428		15.0096	5.30029
Q2QXR8	Pyruvate kinase OS=Oryza sativa subsp. japonica GN=LOC_Os12g05110 PE=2 SV=1 - [Q2QXR8_ORYSJ]	27.89	1	catalytic activity; metal ion binding	membrane	metabolic process; response to stimulus	Pf00224; Pf02887	1.17367		1.55943		1.42465		1.03011		0.897693		1.04246		57.4061	6.75635
A2YAT3	Annexin OS=Oryza sativa subsp. indica GN=OsI_22198 PE=3 SV=1 - [A2YAT3_ORYSI]	29.97	9	metal ion binding		response to stimulus	Pf00191	0.96898	7.37567	0.953745	9.47598	1.00726	18.0309	0.986162	8.07342	1.00646	12.705	0.988283	13.1018	35.6725	6.7417
A2X7P6	Putative uncharacterized protein OS=Oryza sativa subsp. indica GN=OsI_08240 PE=4 SV=1 - [A2X7P6_ORYSI]	10.26	1		cytoplasm; membrane; vacuole		Pf03188	0.910996	13.1147	0.887999	5.13036	0.855235	1.35239	0.947383	1.14532	0.937143	11.0634	0.832439	0.501867	25.6097	7.97217
A2WMB0	Putative uncharacterized protein OS=Oryza sativa subsp. indica GN=OsI_00982 PE=3 SV=1 - [A2WMB0_ORYSI]	10.39	2	catalytic activity; nucleotide binding	cytoplasm; membrane	metabolic process	Pf00069; Pf03109; Pf07714	1.20851	6.69886	1.21689	20.8725	1.12082	6.9531	0.87919	10.1679	0.92181	1.62701	0.806584	5.67113	63.951	7.72314
Q6ZIQ1	Os07g0587400 protein OS=Oryza sativa subsp. japonica GN=OJ1047_C01.9 PE=1 SV=1 - [Q6ZIQ1_ORYSJ]	17.16	6	RNA binding	cytoplasm	cell organization and biogenesis; metabolic process	Pf03463; Pf03464; Pf03465	1.03291	5.52206	0.977813	8.10838	0.970635	6.79328	0.963277	3.74451	0.992166	8.70549	0.983339	8.86521	49.0599	5.60498
Q6YZ10	27k vesicle-associated membrane protein-associated protein-like OS=Oryza sativa subsp. japonica GN=P0473D02.15 PE=2 SV=1 - [Q6YZ10_ORYSJ]	32.19	6	structural molecule activity	cytoplasm; membrane	response to stimulus	Pf00635	0.922235	8.72199	0.862921	12.9544	0.855965	20.5569	1.00928	8.4902	1.0204	7.47959	0.986585	8.80744	25.6216	9.53955
O24212	Osr40g2 protein (Fragment) OS=Oryza sativa GN=osr40g2 PE=2 SV=1 - [O24212_ORYSA]	20.7	4					0.954413	8.43966	0.953722	9.68234	0.897559	8.01741	1.01389	9.46731	1.02015	7.48093	0.985746	5.80244	38.633	7.59131
Q338N8	Alanine aminotransferase OS=Oryza sativa subsp. japonica GN=Os10g0390500 PE=2 SV=1 - [Q338N8_ORYSJ]	21.12	8	catalytic activity; metal ion binding; nucleotide binding	cytoplasm; mitochondrion	metabolic process; response to stimulus	Pf00155	1.07012	6.90378	0.999193	13.6182	1.0528	14.8884	0.961012	11.7491	0.977948	9.53091	0.980087	13.0431	52.5599	6.65381
A3BRV6	Putative uncharacterized protein OS=Oryza sativa subsp. japonica GN=OsJ_26868 PE=4 SV=1 - [A3BRV6_ORYSJ]	19.64	7		cytoplasm		Pf02469	0.890942	7.01563	0.908324	21.3205	0.899765	15.5458	1.11638	13.3448	1.11222	8.50897	1.05709	9.30757	41.1034	7.23975
B8BDV4	Putative uncharacterized protein OS=Oryza sativa subsp. indica GN=OsI_32163 PE=4 SV=1 - [B8BDV4_ORYSI]	26.52	13	catalytic activity	cytoplasm; membrane	metabolic process	Pf00759	0.920851	12.083	0.902813	15.1582	0.907403	8.50677	1.04359	12.9237	1.09084	8.90712	1.10073	8.81551	56.856	6.45557
B9G7S6	Putative uncharacterized protein OS=Oryza sativa subsp. japonica GN=OsJ_30891 PE=3 SV=1 - [B9G7S6_ORYSJ]	15.32	12	catalytic activity; nucleotide binding	cytoplasm; membrane; mitochondrion	metabolic process; response to stimulus	Pf01411; Pf07973	0.983783	5.12066	0.952764	13.5156	0.985384	13.6685	0.922955	9.96255	0.910501	12.3556	0.941797	14.1073	99.0225	6.26514
A2Y7R5	GTP-binding nuclear protein Ran-2 OS=Oryza sativa subsp. indica GN=RAN2 PE=2 SV=1 - [RAN2_ORYSI]	23.98	5	catalytic activity; nucleotide binding	cytoplasm; extracellular; membrane; nucleus; organelle lumen	cell communication; metabolic process; regulation of biological process; response to stimulus; transport	Pf00025; Pf00071; Pf08477	0.978015	5.00273	0.894998	6.33599	0.926673	6.71773	0.929657	10.3887	1.00874	7.85909	0.919513	8.94452	25.0227	7.12256
A2Y3I6	Putative uncharacterized protein OS=Oryza sativa subsp. indica GN=OsI_19569 PE=4 SV=1 - [A2Y3I6_ORYSI]	26.97	11	catalytic activity	membrane; nucleus; organelle lumen	metabolic process	Pf00557	0.977671	8.99256	0.876207	7.11901	0.885282	10.1845	0.939246	8.17119	0.949935	8.08508	0.889578	9.36636	43.1565	7.07861
B9FQR2	Putative uncharacterized protein OS=Oryza sativa subsp. japonica GN=OsJ_22535 PE=4 SV=1 - [B9FQR2_ORYSJ]	31.07	3					0.973567	19.4199	1.05089	35.9422	0.944764	26.1454	1.03301	10.0458	1.0281	8.63454	1.02545	13.8547	10.8003	8.01611
A2XDI0	Putative uncharacterized protein OS=Oryza sativa subsp. indica GN=OsI_10369 PE=4 SV=1 - [A2XDI0_ORYSI]	4.17	1		membrane		Pf04526	0.962196	13.035	0.86064	18.3516	0.963495	19.8153	1.03532	16.2735	0.965956	7.93415	1.0951	12.7478	40.9722	9.86182
Q94EF4	Os01g0769700 protein OS=Oryza sativa subsp. japonica GN=P0665A11.8 PE=4 SV=1 - [Q94EF4_ORYSJ]	8.26	3	catalytic activity; nucleotide binding	cytoplasm	metabolic process	Pf00069; Pf07714; Pf11721; Pf12733; Pf12819	0.896251	4.21285	0.880308	7.23807	0.838313	4.72352	1.06042	1.84222	1.13619	8.26048	1.05702	4.54158	96.2981	6.31592
B8AQA0	Putative uncharacterized protein OS=Oryza sativa subsp. indica GN=OsI_13187 PE=3 SV=1 - [B8AQA0_ORYSI]	12.15	8	catalytic activity	cytoplasm; cytosol; membrane; mitochondrion; ribosome	metabolic process	Pf00232	0.863421	7.51578	0.865537	12.6804	0.866566	11.8825	1.04742	5.59638	1.06065	7.91333	1.01259	8.47955	63.0425	7.1665
Q01N35	OSIGBa0123D13.7 protein OS=Oryza sativa GN=OSIGBa0148I18.2 PE=4 SV=1 - [Q01N35_ORYSA]	16.35	6	protein binding			Pf01399	0.949957	6.54376	0.8937	7.07263	0.868459	7.22603	0.963949	7.57534	0.988978	4.1594	0.981898	10.2115	46.246	5.30029
Q69LA6	Probable pyridoxal biosynthesis protein PDX1.1 OS=Oryza sativa subsp. japonica GN=PDX11 PE=2 SV=1 - [PDX11_ORYSJ]	24.21	8	catalytic activity; protein binding	cytoplasm; cytosol; membrane	metabolic process; response to stimulus	Pf01680; Pf05690	0.999805	7.01301	0.927392	9.69823	0.940746	9.05699	0.925715	7.64181	0.954182	10.0494	0.931625	8.60924	33.7153	6.88818
Q6Z1R9	Os08g0230200 protein OS=Oryza sativa subsp. japonica GN=OSJNBa0038P10.32 PE=2 SV=1 - [Q6Z1R9_ORYSJ]	33.61	11		membrane			1.01896	12.4036	1.02338	9.37086	1.00992	20.1361	1.06994	11.4383	1.05186	10.6654	1.09718	9.91312	51.6632	9.17334
B9FNJ0	Putative uncharacterized protein OS=Oryza sativa subsp. japonica GN=OsJ_17831 PE=4 SV=1 - [B9FNJ0_ORYSJ]	4.76	1	catalytic activity; nucleotide binding	cytoplasm; membrane	metabolic process	Pf00069; Pf07714; Pf11721; Pf12819	0.901106		0.766996		0.855798		0.92838		0.970064		0.949731		99.8035	5.8335
A3C132	Putative uncharacterized protein OS=Oryza sativa subsp. japonica GN=OsJ_30180 PE=3 SV=1 - [A3C132_ORYSJ]	6.27	1	transporter activity	membrane	transport	Pf00230	0.995368	11.2538	0.93925	12.0741	0.890709	20.6423	0.924947	12.3813	0.991163	9.18687	0.953074	10.2829	26.8953	8.71924
Q0DPC9	Lipoxygenase OS=Oryza sativa subsp. japonica GN=Os03g0700700 PE=3 SV=2 - [Q0DPC9_ORYSJ]	28.59	20	catalytic activity; metal ion binding; protein binding	cytoplasm	defense response; development; metabolic process; response to stimulus	Pf00305; Pf01477	0.96812	8.79792	0.93989	14.5386	0.947265	10.6299	0.979936	9.81516	0.976507	9.93469	0.982827	10.0163	88.9149	6.81494
A3BW58	Putative uncharacterized protein OS=Oryza sativa subsp. japonica GN=OsJ_28414 PE=3 SV=1 - [A3BW58_ORYSJ]	23.19	12	catalytic activity; nucleotide binding	cytoplasm	metabolic process	Pf00069; Pf07714	1.00899	9.57483	0.987182	9.96259	1.01269	13.8864	0.979529	8.08552	1.02711	7.99446	1.03513	7.52315	58.9323	7.15186
Q6Z5P1	Putative dynamin homolog OS=Oryza sativa subsp. japonica GN=P0684F11.15 PE=3 SV=1 - [Q6Z5P1_ORYSJ]	19.61	9	catalytic activity; nucleotide binding; protein binding		metabolic process	Pf00169; Pf00350; Pf01031; Pf02212	0.931537	14.432	0.916558	18.8244	0.864216	21.4725	1.09297	10.8782	1.04796	11.9885	1.04781	8.65709	99.8679	9.15869
B9FB84	Putative uncharacterized protein OS=Oryza sativa subsp. japonica GN=OsJ_12376 PE=3 SV=1 - [B9FB84_ORYSJ]	9.78	4	transporter activity	cytoplasm; membrane; vacuole	transport	Pf00854; Pf07690	0.962573	12.7555	1.05162	12.4404	1.13677	15.9657	1.06602	9.62536	1.05352	12.3888	1.15059	4.96519	65.4392	5.31299
Q5Z9S8	Pleiotropic drug resistance protein 12 OS=Oryza sativa subsp. japonica GN=PDR12 PE=2 SV=1 - [PDR12_ORYSJ]	13.07	15	catalytic activity; nucleotide binding; transporter activity	cytoplasm; membrane; mitochondrion	cell organization and biogenesis; defense response; metabolic process; regulation of biological process; response to stimulus; transport	Pf00005; Pf01061; Pf08370; Pf12698	1.02987	8.22483	1.00395	10.9633	1.01254	12.6055	0.962134	8.17134	0.969148	9.05365	0.953772	7.56141	169.021	8.57275
Q69WS1	Os07g0194000 protein OS=Oryza sativa subsp. japonica GN=OJ1118_E12.19 PE=2 SV=1 - [Q69WS1_ORYSJ]	28.18	6		cytoplasm; membrane	transport	Pf00957	0.938176	8.13613	0.920976	8.72306	0.916693	8.24093	0.994942	5.81177	1.00262	6.49615	1.00036	6.05088	24.7619	8.88037
A2XB64	Putative uncharacterized protein OS=Oryza sativa subsp. indica GN=OsI_09504 PE=3 SV=1 - [A2XB64_ORYSI]	11.11	2	transporter activity	cytoplasm; membrane; mitochondrion; vacuole	response to stimulus; transport	Pf00230	0.993125	9.86178	1.00652	8.72253	1.05921	5.54332	0.845537	7.64824	0.821659	7.87197	0.885307	26.0768	30.778	8.86572
Q9AWV5	Putative Bowman Birk trypsin inhibitor OS=Oryza sativa subsp. japonica GN=P0044F08.5 PE=3 SV=1 - [Q9AWV5_ORYSJ]	12.71	2	enzyme regulator activity	extracellular	metabolic process; regulation of biological process		0.823937	10.1152	0.882481	17.5583	0.812191	11.0997	1.09436	3.40854	1.02531	4.71592	1.00863	7.49871	19.6583	7.97217
A2YQC8	Putative uncharacterized protein OS=Oryza sativa subsp. indica GN=OsI_27492 PE=4 SV=1 - [A2YQC8_ORYSI]	18.87	7	catalytic activity	cytoplasm	cell communication; metabolic process; regulation of biological process; response to stimulus	Pf00388	0.974282	10.2713	0.958967	11.8245	0.938027	11.9746	1.03244	7.07921	1.04651	8.26874	0.975599	8.07777	43.2391	6.30322
B8AKL0	Glucose-6-phosphate isomerase OS=Oryza sativa subsp. indica GN=OsI_13718 PE=3 SV=1 - [B8AKL0_ORYSI]	12.7	1	catalytic activity	cytoplasm; membrane	defense response; metabolic process; response to stimulus	Pf00342	1.00554	10.2964	1.37199	0.260703	1.07266	3.22165	1.03031	1.2191	0.90696	11.5874	0.936828	12.9302	62.5835	7.45947
Q6L569	Putative receptor protein kinase OS=Oryza sativa subsp. japonica GN=OJ1115_D04.2 PE=4 SV=1 - [Q6L569_ORYSJ]	21.92	10	catalytic activity; nucleotide binding		metabolic process	Pf00069; Pf07714; Pf08263; Pf12799	1.03539	6.15339	1.04324	9.23072	1.05878	12.9801	0.952213	11.2085	0.959565	10.5977	0.998338	12.2008	68.5369	8.42627
A2YDT7	Putative uncharacterized protein OS=Oryza sativa subsp. indica GN=OsI_23273 PE=4 SV=1 - [A2YDT7_ORYSI]	35.98	5				Pf04398	1.10988	10.8597	1.28747	14.9183	1.06704	8.85551	1.0569	11.329	0.933153	10.4689	0.968378	11.3936	17.5881	5.79541
A2Y9X7	Proteasome subunit alpha type-4-1 OS=Oryza sativa subsp. indica GN=OsI_021120 PE=1 SV=2 - [PSA4A_ORYSI]	18.4	4	catalytic activity	cytoplasm; cytosol; nucleus; proteasome; ribosome; vacuole	metabolic process; response to stimulus	Pf00227; Pf10584	0.980317	4.31268	0.956605	14.4078	0.966798	15.8314	0.943939	16.3718	1.01738	18.0293	0.999557	21.2543	27.0266	6.91748
A2ZB00	40S ribosomal protein S16 OS=Oryza sativa subsp. indica GN=RPS16A PE=2 SV=1 - [RS16_ORYSI]	22.15	4	structural molecule activity	cytoplasm; cytosol; membrane; nucleus; organelle lumen; ribosome	metabolic process	Pf00380	0.931325	4.94227	0.962685	5.4323	0.993085	7.42042	1.08864	7.71889	1.10111	7.5468	1.05938	8.69438	16.8082	10.5649
A2ZWD3	Putative uncharacterized protein OS=Oryza sativa subsp. japonica GN=OsJ_02950 PE=4 SV=1 - [A2ZWD3_ORYSJ]	8.89	2		cytoplasm		Pf02469	0.872205	9.79995	0.902126	13.6698	0.817819	18.7608	1.11735	12.766	1.10417	9.46328	1.00031	4.66271	22.5246	8.646
Q7XPL0	OSJNBa0085I10.16 protein OS=Oryza sativa subsp. japonica GN=OSJNBa0085I10.16 PE=4 SV=2 - [Q7XPL0_ORYSJ]	18.31	7	catalytic activity			Pf02458	0.911239	21.2302	0.925693	18.0559	0.912559	13.9144	1.11541	19.9229	1.13733	16.1752	1.11633	12.296	46.612	6.04932
Q5N8I8	Os01g0700000 protein OS=Oryza sativa subsp. japonica GN=P0047E11.2 PE=2 SV=1 - [Q5N8I8_ORYSJ]	28.85	5		cytoplasm; mitochondrion			0.989434	18.1904	1.11629	29.949	1.04865	28.8004	1.12545	8.6054	1.1424	10.973	1.13515	10.5737	27.4054	4.75439
Q5Y8C8	Somatic embryogenesis protein kinase 1 OS=Oryza sativa subsp. japonica GN=OsJ_15037 PE=2 SV=1 - [Q5Y8C8_ORYSJ]	13.38	4	catalytic activity; nucleotide binding	cytoplasm; mitochondrion	metabolic process	Pf00069; Pf07714; Pf08263; Pf12799	0.954316	7.77941	0.914581	12.4199	0.886607	16.3286	0.975177	12.5675	0.970329	16.854	1.0084	13.3086	69.4698	6.3667
B8AUM3	Putative uncharacterized protein OS=Oryza sativa subsp. indica GN=OsI_14701 PE=4 SV=1 - [B8AUM3_ORYSI]	19.21	9	catalytic activity	membrane	metabolic process	Pf03033	0.985289	7.53551	0.946548	22.903	0.941825	15.8063	1.02795	13.6038	1.04153	10.0634	1.04112	15.88	65.9898	6.23975
B9FAW0	Putative uncharacterized protein OS=Oryza sativa subsp. japonica GN=OsJ_09261 PE=4 SV=1 - [B9FAW0_ORYSJ]	8.06	14	catalytic activity	membrane	metabolic process	Pf02364; Pf04652	1.00779	10.4593	1.01272	15.9349	0.955899	6.94003	0.995558	9.90652	1.01444	7.71543	1.01024	10.19	228.868	8.86572
B8ATU6	Putative uncharacterized protein OS=Oryza sativa subsp. indica GN=OsI_17299 PE=4 SV=1 - [B8ATU6_ORYSI]	18.88	5		membrane			0.927293	23.535	0.874186	25.561	1.09264	33.2396	1.0448	2.36256	1.04311	5.13736	1.09857	6.49992	51.6094	9.42236
Q10PW2	Alpha-tubulin OS=Oryza sativa subsp. japonica GN=TubA PE=2 SV=1 - [Q10PW2_ORYSJ]	15.81	2	catalytic activity; nucleotide binding; structural molecule activity	cytoskeleton	cell organization and biogenesis; cellular component movement; metabolic process	Pf00091; Pf03953	0.976795	4.05894	0.898936	3.61785	0.908762	10.1729	0.946883	1.39287	0.930831	0.215969	0.940789	1.86617	50.0289	5.24951
B8A6V4	Putative uncharacterized protein OS=Oryza sativa subsp. indica GN=OsI_03121 PE=4 SV=1 - [B8A6V4_ORYSI]	23.02	12	catalytic activity	membrane	metabolic process	Pf00501	0.990502	6.76403	0.996184	13.068	0.983111	10.4348	0.983486	8.11481	1.03642	8.38986	0.960994	7.59581	72.7239	6.25244
Q5XQQ5	SNARE 13 OS=Oryza sativa subsp. japonica GN=NPSN13 PE=2 SV=1 - [Q5XQQ5_ORYSJ]	19.17	6	protein binding	membrane		Pf03908	0.967948	13.5534	0.93781	34.0823	0.923914	29.4568	1.10068	5.11053	0.999742	12.6608	1.06153	12.6439	30.0125	8.47021
B8B9C4	Putative uncharacterized protein OS=Oryza sativa subsp. indica GN=OsI_30128 PE=3 SV=1 - [B8B9C4_ORYSI]	21.33	8	catalytic activity; metal ion binding; nucleotide binding	membrane	metabolic process	Pf00107; Pf03435; Pf08240	1.08343	11.5827	1.17022	19.6822	1.13746	15.6864	0.984906	13.7678	0.8925	8.16205	0.95183	12.3311	38.4996	6.39209
B9FB57	Putative uncharacterized protein OS=Oryza sativa subsp. japonica GN=OsJ_12315 PE=4 SV=1 - [B9FB57_ORYSJ]	7.78	12	catalytic activity	membrane	cell communication; metabolic process; regulation of biological process; response to stimulus	Pf00454; Pf00613	1.05496	13.2308	1.10035	21.8382	1.09078	21.5807	1.02842	5.56604	1.00223	7.80551	1.05231	10.7618	210.908	6.29053
A3CB05	Serine hydroxymethyltransferase OS=Oryza sativa subsp. japonica GN=OsJ_33805 PE=3 SV=1 - [A3CB05_ORYSJ]	19.24	7	catalytic activity	membrane	cell differentiation; cell organization and biogenesis; development; metabolic process; response to stimulus	Pf00155; Pf00464	1.00383	12.0561	1.00574	10.9039	1.12406	18.3198	1.01904	4.32095	1.07992	6.2178	1.05953	15.8251	48.969	7.45947
Q8W3N0	26S proteasome regulatory particle non-ATPase subunit9b (Fragment) OS=Oryza sativa subsp. japonica GN=OsRPN9b PE=2 SV=1 - [Q8W3N0_ORYSJ]	12.81	3	protein binding	proteasome		Pf01399	1.12939	20.4176	1.03094	24.1214	1.14631	25.2059	1.01225	13.1491	0.954342	9.84794	0.972028	8.64841	31.6487	5.64307
Q2QNG7	ATP-citrate synthase alpha chain protein 3 OS=Oryza sativa subsp. japonica GN=ACLA-3 PE=2 SV=1 - [ACLA3_ORYSJ]	16.08	6	catalytic activity; nucleotide binding	cytoplasm; cytosol	metabolic process	Pf08442	1.03412	6.68403	1.02545	9.76062	1.02195	15.0062	0.945301	4.3388	0.973247	8.40539	0.901278	14.7611	46.765	5.57959
Q7F1F2	Os08g0525600 protein OS=Oryza sativa subsp. japonica GN=OJ1191_A10.119 PE=2 SV=1 - [Q7F1F2_ORYSJ]	14.83	7	catalytic activity; protein binding	cytoplasm; membrane; vacuole	metabolic process	Pf00254; Pf00515; Pf07719	0.992511	11.9219	0.997775	9.40669	0.971401	9.4606	0.984103	7.43322	0.977923	9.18686	0.957757	10.2329	64.0818	5.23682
A2WXT2	Serine/threonine-protein kinase OS=Oryza sativa subsp. indica GN=OsI_04734 PE=3 SV=1 - [A2WXT2_ORYSI]	12.65	8	catalytic activity; nucleotide binding	cytoplasm; mitochondrion	cell communication; metabolic process; reproduction	Pf00024; Pf00069; Pf00954; Pf01453; Pf07714; Pf08276	1.04229	12.3418	1.22425	20.7701	1.06684	23.214	1.05466	5.3591	1.06021	11.9532	1.06175	11.2739	88.6915	8.23584
Q10L71	Os03g0356700 protein OS=Oryza sativa subsp. japonica GN=Os03g0356700 PE=4 SV=1 - [Q10L71_ORYSJ]	14.91	13	protein binding		cell organization and biogenesis	Pf00626; Pf02209	0.969676	7.05113	0.981413	10.3464	0.949315	13.2529	0.981955	8.05737	0.981124	7.6503	0.927155	9.34795	106.054	5.8208
B8ADW8	Putative uncharacterized protein OS=Oryza sativa subsp. indica GN=OsI_06329 PE=4 SV=1 - [B8ADW8_ORYSI]	14.27	6	protein binding; structural molecule activity	cytoplasm; membrane	transport	Pf00400; Pf04053	0.932284	6.27391	0.969731	13.8818	0.953304	12.069	0.97898	6.19968	0.968215	10.074	0.989766	9.38068	101.374	5.10986
B8A753	Putative uncharacterized protein OS=Oryza sativa subsp. indica GN=OsI_01672 PE=3 SV=1 - [B8A753_ORYSI]	11.48	2	antioxidant activity; catalytic activity; metal ion binding		metabolic process; response to stimulus	Pf00141	1.04244	25.9991	1.21841	47.6928	1.41868	56.9831	1.19098	3.92835	1.13199	13.9567	1.20783	6.35554	37.6897	6.66846
Q0DJW8	Os05g0218400 protein (Fragment) OS=Oryza sativa subsp. japonica GN=Os05g0218400 PE=3 SV=1 - [Q0DJW8_ORYSJ]	20.77	3	catalytic activity; nucleotide binding	membrane	metabolic process	Pf00069; Pf07714	0.916687	13.1708	0.913332	6.24234	0.917759	12.0689	1.10509	11.5126	1.17615	13.9351	1.10075	10.3862	43.2594	7.35693
Q7XIK5	Os04g0613600 protein OS=Oryza sativa subsp. japonica GN=OJ1773_H01.103 PE=1 SV=1 - [Q7XIK5_ORYSJ]	24.84	2	structural molecule activity	cytoplasm; cytosol; membrane; ribosome	metabolic process	Pf00366	0.884368	2.80514	0.819756	0.745419	0.781735	5.05964	1.05706	0.785598	1.02971	1.2518	0.928731	8.7954	17.8246	10.5796
B8BJD1	Coatomer subunit beta OS=Oryza sativa subsp. indica GN=OsI_35302 PE=3 SV=1 - [B8BJD1_ORYSI]	13.26	4	structural molecule activity	cytoplasm; Golgi; membrane	transport	Pf01602; Pf07718	1.03393	9.13461	1.10693	15.0923	1.02172	11.1825	0.955634	9.4577	0.901842	5.96133	0.895577	9.82177	105.115	5.87158
Q8H821	Serine/threonine-protein kinase OS=Oryza sativa subsp. japonica GN=OJ1743A09.6 PE=2 SV=1 - [Q8H821_ORYSJ]	10.79	7	catalytic activity; nucleotide binding; protein binding	cytoplasm	cell communication; metabolic process; reproduction	Pf00069; Pf00954; Pf01453; Pf07714; Pf08276	1.02814	9.38212	1.02049	8.0572	1.05085	8.9101	0.941083	6.92532	0.951421	5.56199	0.975752	8.23514	91.3449	7.1665
B8ANY8	Putative uncharacterized protein OS=Oryza sativa subsp. indica GN=OsI_11431 PE=3 SV=1 - [B8ANY8_ORYSI]	9.29	4	catalytic activity; nucleotide binding	membrane	metabolic process	Pf00069; Pf07714; Pf11721; Pf12733; Pf12819	0.925429	5.85249	0.968142	9.91986	0.900035	11.9843	0.990154	7.12812	1.02283	9.54498	0.971331	6.7347	96.2298	6.46826
Q7XRB6	OSJNBa0006B20.1 protein OS=Oryza sativa subsp. japonica GN=OSJNBa0006B20.1 PE=2 SV=1 - [Q7XRB6_ORYSJ]	24.28	6		cytoplasm; cytosol; nucleus	response to stimulus	Pf00415	1.14474	14.7794	1.16745	15.9448	1.11763	9.25858	0.936063	9.42681	0.897473	7.4068	0.918642	8.5249	48.1425	5.65576
Q9AUR8	Coatomer subunit alpha-1 OS=Oryza sativa subsp. japonica GN=Os03g0711400 PE=2 SV=1 - [COPA1_ORYSJ]	17.82	4	protein binding; structural molecule activity	cytoplasm; Golgi; membrane; mitochondrion	transport	Pf00400; Pf04053; Pf06957	1.00051	9.29966	1.01859	24.1708	0.991358	22.3838	0.974237	11.1487	1.06055	6.24168	0.997956	14.0617	136.294	6.90283
Q0IXC7	Os10g0447900 protein OS=Oryza sativa subsp. japonica GN=Os10g0447900 PE=4 SV=2 - [Q0IXC7_ORYSJ]	18.65	5	transporter activity	cytoplasm; membrane	transport	Pf03600	1.08674	9.44596	1.07305	10.8921	1.10862	13.7006	0.892116	13.7963	0.921528	12.8266	0.965156	18.7265	35.5507	8.07471
Q6AUG4	Os05g0563550 protein OS=Oryza sativa subsp. japonica GN=OSJNBb0053D02.7 PE=4 SV=1 - [Q6AUG4_ORYSJ]	14.34	3		cytoplasm		Pf02469	0.977299	32.1378	0.955734	23.9101	1.12063	18.3476	1.10817	10.1871	1.02472	13.2473	1.0249	9.48246	25.0759	8.77783
Q75HX0	Os05g0438800 protein OS=Oryza sativa subsp. japonica GN=OSJNBb0042J17.12 PE=2 SV=1 - [Q75HX0_ORYSJ]	18.88	3	nucleotide binding	cytoplasm; cytoskeleton		Pf00022	1.0423	9.00448	1.14506	19.5641	1.13308	20.6138	0.929414	8.34461	0.919909	1.8915	0.890946	19.0219	41.5807	5.47803
A2WXW7	Putative uncharacterized protein OS=Oryza sativa subsp. indica GN=OsI_04772 PE=3 SV=1 - [A2WXW7_ORYSI]	18.82	8	metal ion binding; protein binding	cytoplasm; endoplasmic reticulum; membrane	cell communication; cell death; defense response; metabolic process; regulation of biological process; response to stimulus	Pf00262	1.00837	11.6518	0.935401	14.6447	0.969357	10.8337	1.02484	9.83959	1.01203	9.35125	0.998209	10.385	49.864	6.87354
Q8H3E9	Putative BLE2 protein OS=Oryza sativa subsp. japonica GN=P0018C07.104 PE=4 SV=1 - [Q8H3E9_ORYSJ]	6.92	1		membrane			1.0497	14.9941	0.993405	15.5171	1.0386	4.79105	0.918897	3.48029	0.947597	8.22459	0.891319	1.06345	110.233	8.33838
B9GA42	Putative uncharacterized protein OS=Oryza sativa subsp. japonica GN=OsJ_33487 PE=4 SV=1 - [B9GA42_ORYSJ]	11.7	2	catalytic activity	membrane	metabolic process	Pf07859	1.13743	11.8389	1.07036	7.52148	1.22615	24.5085	1.13917	20.8842	1.17753	15.4737	1.36512	19.0832	37.2388	10.7993
Q5JK10	Os01g0926300 protein OS=Oryza sativa subsp. japonica GN=OSJNBa0093F16.14 PE=2 SV=1 - [Q5JK10_ORYSJ]	14.81	6	catalytic activity	cytoplasm; mitochondrion	metabolic process; response to stimulus	Pf00923	0.843826	7.56737	0.783383	10.2175	0.778187	9.80166	1.08556	8.25954	1.13279	2.82808	1.06198	7.98474	46.4023	6.44287
Q6EQX0	Putative glutathione transferase OS=Oryza sativa subsp. japonica GN=OSJNBa0086N11.18 PE=4 SV=1 - [Q6EQX0_ORYSJ]	25.3	7	catalytic activity		response to stimulus	Pf00043	1.04767	8.27443	1.06295	9.25539	1.14206	15.555	0.936911	14.9665	0.969315	12.6725	0.975884	18.6248	37.3567	6.30322
Q0DJL9	Os05g0258400 protein OS=Oryza sativa subsp. japonica GN=Os05g0258400 PE=4 SV=2 - [Q0DJL9_ORYSJ]	7.03	1	catalytic activity; nucleotide binding	membrane	metabolic process	Pf00069; Pf07714; Pf11721; Pf12819	0.948753		1.08356		0.99409		0.878597		0.889556		0.878719		88.0113	7.60596
Q40642	Calmodulin-like protein 1 OS=Oryza sativa subsp. indica GN=CML1 PE=1 SV=1 - [CML1_ORYSI]	27.81	3	metal ion binding	membrane		Pf00036; Pf12763	0.964487	2.53359	0.985985	5.37297	1.046	1.07993	1.09139	3.63125	1.10504	5.30631	1.05846	5.802	20.9603	4.83057
Q9SDG6	60S ribosomal protein L30 OS=Oryza sativa subsp. japonica GN=RPL30 PE=3 SV=1 - [RL30_ORYSJ]	37.84	2	structural molecule activity	cytoplasm; cytosol; ribosome	metabolic process	Pf01248	0.948163	10.9175	0.903133	6.66482	0.942554	8.43312	1.02876	10.9252	1.09657	7.75798	1.04095	7.45662	12.3555	9.5835
Q6Z4C0	Os07g0510400 protein OS=Oryza sativa subsp. japonica GN=P0409B11.23 PE=2 SV=1 - [Q6Z4C0_ORYSJ]	8.71	1	catalytic activity		metabolic process	Pf00201	1.24433		1.20012		1.21389		0.824704		0.945155		0.89924		51.9538	6.26514
Q650Z5	Blue copper-binding protein-like OS=Oryza sativa subsp. japonica GN=B1331F11.29 PE=4 SV=1 - [Q650Z5_ORYSJ]	11.32	2	metal ion binding			Pf02298	0.979311	5.33645	0.975101	6.55658	0.917572	5.26921	0.992573	5.25051	0.989999	8.89489	0.949787	6.87334	16.388	6.90283
A2ZHF1	Non-specific lipid-transfer protein 1 OS=Oryza sativa subsp. indica GN=LTP PE=2 SV=1 - [NLTP1_ORYSI]	37.07	3		cytoplasm	transport	Pf00234	1.04535	5.18326	1.0916	13.3684	1.22362	7.56526	0.893035	11.6592	0.921315	16.3124	0.884065	8.81112	11.3378	9.33447
Q2QYX6	Sec61beta family protein, expressed OS=Oryza sativa subsp. japonica GN=LOC_Os12g01260 PE=4 SV=1 - [Q2QYX6_ORYSJ]	37.38	3		membrane		Pf03911	1.03867	12.2166	0.996658	3.36285	1.08527	13.5072	1.02013	7.70679	1.02895	5.42716	1.07089	7.12653	10.6674	11.9272
Q7XKA9	OSJNBa0064G10.22 protein OS=Oryza sativa subsp. japonica GN=OSJNBa0064G10.22 PE=2 SV=2 - [Q7XKA9_ORYSJ]	21.86	3		cytoplasm		Pf06749	1.0753	8.00312	1.19123	10.0034	1.09931	10.3204	1.05812	9.44482	0.943143	12.8931	0.974177	13.4089	19.5842	9.20264
Q4LB25	OSJNBa0042L16.20 protein OS=Oryza sativa subsp. japonica GN=OSJNBa0042L16.20 PE=4 SV=1 - [Q4LB25_ORYSJ]	4.98	1	catalytic activity		cell communication; metabolic process; regulation of biological process; response to stimulus		1.19264	19.7474	1.1488	10.8392	1.09761	19.9859	0.978267	12.8849	0.913765	27.627	0.986627	16.1187	44.0231	7.97217
Q654U5	Os06g0247800 protein OS=Oryza sativa subsp. japonica GN=OJ1136_C11.25 PE=2 SV=1 - [Q654U5_ORYSJ]	20.53	11	catalytic activity; nucleotide binding; protein binding		metabolic process	Pf00169; Pf00350; Pf01031; Pf02212	0.906281	8.08726	0.877131	12.79	0.882253	8.65123	1.02736	7.25646	1.03256	6.9823	1.04552	6.42008	99.1805	9.17334
A3CJV0	Putative uncharacterized protein OS=Oryza sativa subsp. japonica GN=OsJ_37020 PE=4 SV=1 - [A3CJV0_ORYSJ]	10.98	5	catalytic activity	cytoplasm; mitochondrion	metabolic process	Pf07995	0.844739	8.28977	0.88629	11.981	0.88217	7.44887	1.05225	5.10905	1.06668	2.81513	1.02136	6.06326	72.0754	5.70654
Q0DSY0	Os03g0281600 protein (Fragment) OS=Oryza sativa subsp. japonica GN=Os03g0281600 PE=3 SV=1 - [Q0DSY0_ORYSJ]	15.15	10	catalytic activity; metal ion binding; nucleotide binding; transporter activity	cytoplasm; endoplasmic reticulum; membrane	cellular homeostasis; metabolic process; response to stimulus; transport	Pf00122; Pf00689; Pf00690; Pf00702; Pf08282; Pf12710	0.91389	9.15622	0.942217	7.83004	0.987139	9.90602	1.031	7.09837	1.06471	10.8985	1.02799	9.68218	91.1578	5.14795
Q6YZD3	Lipid transfer protein-like OS=Oryza sativa subsp. japonica GN=P0702E04.24-2 PE=2 SV=1 - [Q6YZD3_ORYSJ]	14.04	3		cytoplasm	transport	Pf00234	0.95355	23.3426	1.05716	44.5951	0.903646	26.0843	1.12241	17.3352	1.01568	17.9664	0.980438	14.7816	18.2969	6.7124
Q93WM3	Os01g0372700 protein OS=Oryza sativa subsp. japonica GN=B1039D07.28 PE=3 SV=1 - [Q93WM3_ORYSJ]	13.24	7	catalytic activity; nucleotide binding	cytoplasm; mitochondrion	metabolic process; response to stimulus	Pf00152; Pf00458; Pf01336	1.02189	10.0239	1.02512	14.0834	0.967289	11.5523	0.942403	9.08645	0.941325	8.65704	0.943923	14.769	62.5491	5.93506
Q2QXF5	Harpin-induced protein 1 containing protein, expressed OS=Oryza sativa subsp. japonica GN=LOC_Os12g06220 PE=2 SV=1 - [Q2QXF5_ORYSJ]	19.27	3		cytoplasm			1.02998	13.431	1.11402	17.048	1.06367	17.9522	1.00262	12.2555	1.00263	11.323	1.03333	12.196	20.7957	8.89502
B8AAS8	Putative uncharacterized protein OS=Oryza sativa subsp. indica GN=OsI_02526 PE=4 SV=1 - [B8AAS8_ORYSI]	11.54	10	catalytic activity; nucleotide binding	cytoplasm; endoplasmic reticulum; membrane	cell differentiation; cell growth; cell organization and biogenesis; development; transport	Pf02263; Pf05879	0.965667	11.6172	0.990402	25.805	0.960736	17.3798	1.07046	11.709	1.03932	9.55056	1.03553	8.97526	90.4142	6.20166
B7E588	Serine hydroxymethyltransferase OS=Oryza sativa subsp. japonica PE=2 SV=1 - [B7E588_ORYSJ]	24.36	10	catalytic activity; metal ion binding; RNA binding	cytoplasm; cytosol; extracellular; membrane; mitochondrion; nucleus; ribosome	metabolic process; response to stimulus	Pf00155; Pf00464	0.885094	8.03521	0.883247	15.8208	0.874416	13.3933	1.08994	5.32159	1.08552	7.9226	1.05885	8.80199	46.7098	8.67529
Q7XLP7	OSJNBa0044M19.9 protein OS=Oryza sativa subsp. japonica GN=OSJNBa0044M19.9 PE=2 SV=2 - [Q7XLP7_ORYSJ]	28.02	9	catalytic activity	cytoplasm	metabolic process	Pf00463	1.04695	12.5763	1.01957	14.9775	1.07817	18.3662	0.939429	5.4136	0.93316	13.2014	0.898096	8.31925	41.2935	5.84619
Q6Z4K6	DEAD-box ATP-dependent RNA helicase 52B OS=Oryza sativa subsp. japonica GN=PL10B PE=2 SV=1 - [RH52B_ORYSJ]	10.34	1	catalytic activity; nucleotide binding; RNA binding	cytoplasm		Pf00270; Pf00271	1.17831	31.5088	1.10932	15.388	1.27798	18.095	1.22937	26.2988	1.08665	6.26407	1.15724	1.50567	67.1305	8.22119
A2Y0T4	60S ribosomal protein L10-2 OS=Oryza sativa subsp. indica GN=SG12 PE=2 SV=2 - [RL102_ORYSI]	27.4	2	structural molecule activity	cytoplasm; cytosol; membrane; nucleus; organelle lumen; ribosome; vacuole	metabolic process; response to stimulus	Pf00252	0.943251	6.0372	0.935856	13.229	0.93857	16.2163	1.03989	4.11942	1.07864	3.19186	1.07074	9.14629	24.656	10.3599
B9FM56	Putative uncharacterized protein OS=Oryza sativa subsp. japonica GN=OsJ_16892 PE=4 SV=1 - [B9FM56_ORYSJ]	25.07	7	metal ion binding	membrane		Pf00190	1.06761	6.92345	0.992855	8.44181	1.11654	21.99	0.918074	7.91217	0.976869	5.9373	0.963726	13.074	38.2306	6.16357
Q75I96	BRASSINOSTEROID INSENSITIVE 1-associated receptor kinase 1, putative, expressed OS=Oryza sativa subsp. japonica GN=OSJNBa0004L11.14 PE=4 SV=1 - [Q75I96_ORYSJ]	13.88	1	catalytic activity; nucleotide binding		metabolic process	Pf00069; Pf07714; Pf08263	1.0318	8.97396	0.957045	9.7521	1.03941	2.56553	0.966086	6.90538	1.04919	1.89714	0.966118	1.04832	66.8284	5.5415
Q941S7	Os01g0848700 protein OS=Oryza sativa subsp. japonica GN=P0005H10.32 PE=2 SV=1 - [Q941S7_ORYSJ]	17.59	1	DNA binding; nucleotide binding	cytoplasm; endosome; membrane; nucleus	cell communication; metabolic process; regulation of biological process; response to stimulus; transport	Pf00025; Pf00071; Pf04670; Pf08477	1.09635		1.01672		1.17945		1.05629		1.08387		1.16289		23.9071	6.80029
Q9FYX8	Phosphoenolpyruvate carboxylase OS=Oryza sativa PE=2 SV=1 - [Q9FYX8_ORYSA]	14.91	8	catalytic activity; metal ion binding		metabolic process	Pf00311	1.0395	8.60844	1.04454	19.2584	1.10896	21.7943	1.00973	19.558	0.969268	7.94678	0.955994	16.3426	109.121	6.16357
Q7XCR6	Cytochrome b5, putative, expressed OS=Oryza sativa subsp. japonica GN=Os10g0518200 PE=3 SV=1 - [Q7XCR6_ORYSJ]	18.66	2	metal ion binding	cytoplasm; endoplasmic reticulum; membrane; vacuole		Pf00173	1.08616	13.5867	1.13494	5.57096	1.055	14.6331	1.00968	9.67069	0.961612	7.40751	0.903519	3.26749	14.7565	4.91943
B9EVI1	Putative uncharacterized protein OS=Oryza sativa subsp. japonica GN=OsJ_04502 PE=4 SV=1 - [B9EVI1_ORYSJ]	15.3	9	catalytic activity	cytoplasm; endoplasmic reticulum; membrane	metabolic process	Pf05817	0.958518	12.7558	0.977629	13.77	0.957494	12.4968	1.00814	8.6108	1.02339	8.06016	1.0009	10.2586	67.3248	6.90283
Q6K8U8	Os02g0785800 protein OS=Oryza sativa subsp. japonica GN=OJ1715_H01.42 PE=4 SV=1 - [Q6K8U8_ORYSJ]	33.04	3	structural molecule activity	cytoplasm; cytosol; membrane; mitochondrion; ribosome	metabolic process	Pf01247	0.959275	5.41748	0.91731	6.08924	0.862104	7.61727	1.01172	5.75785	1.013	4.7208	1.0181	6.33439	12.7067	10.5503
Q9LST9	Proteasome subunit beta type OS=Oryza sativa subsp. japonica GN=OsPBA1 PE=2 SV=1 - [Q9LST9_ORYSJ]	25.61	6	catalytic activity	cytoplasm; membrane; nucleus; proteasome; vacuole	cell death; defense response; metabolic process; regulation of biological process; response to stimulus	Pf00227	1.02243	13.9334	1.04253	5.91571	1.11263	11.7707	0.988949	12.8883	0.977949	10.2733	0.958188	15.113	26.2572	5.78271
A2ZHH3	Putative uncharacterized protein OS=Oryza sativa subsp. indica GN=OsI_37250 PE=4 SV=1 - [A2ZHH3_ORYSI]	17.63	5		cytoplasm; membrane		Pf06697	1.11404	20.2451	1.09302	26.7977	1.11943	30.8236	1.11391	8.57122	1.04409	13.7681	1.12792	14.9285	33.5515	8.92432
A2XAZ3	Alcohol dehydrogenase class-3 OS=Oryza sativa subsp. indica GN=ADHIII PE=3 SV=1 - [ADHX_ORYSI]	13.65	5	catalytic activity; metal ion binding; nucleotide binding	cytoplasm	cell death; development; metabolic process; reproduction; response to stimulus	Pf00107; Pf08240	1.00419	7.8445	0.992191	8.87028	0.987311	7.97229	1.00743	5.29825	0.964129	9.68813	0.97106	6.43708	40.7685	7.1665
Q75HJ0	DEAD-box ATP-dependent RNA helicase 37 OS=Oryza sativa subsp. japonica GN=PL10A PE=2 SV=1 - [RH37_ORYSJ]	8.95	2	catalytic activity; nucleotide binding; RNA binding	cytoplasm		Pf00270; Pf00271	1.13805	8.00323	1.44798	6.32721	1.30893	11.7251	1.10046	13.2232	0.915251	10.0448	1.00376	9.21839	67.6237	7.88428
A2XRZ0	Probable aldo-keto reductase 2 OS=Oryza sativa subsp. indica GN=OsI_15387 PE=3 SV=1 - [AKR2_ORYSI]	23.08	6	catalytic activity	cytoplasm; membrane	metabolic process; response to stimulus	Pf00248	1.14002	6.97908	1.15858	8.64401	1.11752	10.2902	0.871122	11.4224	0.852371	10.9661	0.819922	6.71112	38.1515	6.62451
Q6K8B8	Os02g0287000 protein OS=Oryza sativa subsp. japonica GN=OJ1756_H07.11 PE=3 SV=1 - [Q6K8B8_ORYSJ]	28.74	3	structural molecule activity	cytoplasm; cytosol; membrane; nucleus; organelle lumen; ribosome	metabolic process	Pf01015	1.05304	4.61631	0.980492	1.05918	1.12355	14.0635	1.02339	8.30736	1.03475	22.8083	1.03407	3.82253	29.7408	9.83252
Q6ZKL8	Probable protein phosphatase 2C 66 OS=Oryza sativa subsp. japonica GN=Os08g0500300 PE=2 SV=1 - [P2C66_ORYSJ]	12.62	5	catalytic activity; metal ion binding	membrane	metabolic process	Pf00481	1.04262	11.1042	1.01278	13.592	1.09375	19.0315	0.95503	9.09286	1.01396	11.1046	1.00101	13.5123	57.6346	5.36377
A2X229	Putative uncharacterized protein OS=Oryza sativa subsp. indica GN=OsI_06254 PE=4 SV=1 - [A2X229_ORYSI]	20.72	7	catalytic activity; protein binding	cytoplasm; cytosol; nucleus	metabolic process; response to stimulus	Pf00077; Pf00240; Pf00627; Pf08284; Pf09668; Pf11976	1.0053	9.84872	0.983588	7.69269	1.01751	17.7757	1.00378	6.16865	1.00687	4.38204	0.96934	11.7496	45.6584	5.19873
A2XC77	Putative uncharacterized protein OS=Oryza sativa subsp. indica GN=OsI_09902 PE=4 SV=1 - [A2XC77_ORYSI]	11.03	3	catalytic activity		metabolic process	Pf01734	0.93765	8.88903	0.857946	6.93411	0.878602	6.3321	0.995432	8.93987	1.02402	6.64438	0.953833	8.46411	45.2422	6.16357
B7E640	cDNA clone:006-212-H08, full insert sequence OS=Oryza sativa subsp. japonica PE=2 SV=1 - [B7E640_ORYSJ]	22.96	2	enzyme regulator activity; protein binding	membrane; proteasome	metabolic process; regulation of biological process	Pf01399; Pf08375	1.1292	9.56851	0.982782	7.70091	0.991966	8.02813	1.02967	14.5906	0.939129	18.1072	1.01643	10.5803	45.0754	8.44092
B8AZB0	Putative uncharacterized protein OS=Oryza sativa subsp. indica GN=OsI_20362 PE=3 SV=1 - [B8AZB0_ORYSI]	10.5	6	catalytic activity; nucleotide binding; protein binding	cytoplasm; membrane	metabolic process	Pf00069; Pf07714; Pf08263	0.816634	9.23481	0.839426	16.5787	0.740376	16.4771	1.17532	13.1482	1.07054	13.3446	1.0692	8.04025	104.31	6.31592
A2WMY5	Importin subunit alpha OS=Oryza sativa subsp. indica GN=OsI_01208 PE=3 SV=1 - [A2WMY5_ORYSI]	13.31	3	protein binding; transporter activity	cytoplasm; cytosol; nucleus; organelle lumen	transport	Pf00514; Pf01749	1.00774	8.1906	0.976	11.9556	0.964484	5.87871	1.00285	2.19283	1.01257	8.67974	1.00485	6.13464	57.5047	5.22412
Q6AUF8	Os05g0564400 protein OS=Oryza sativa subsp. japonica GN=OSJNBb0053D02.13 PE=2 SV=1 - [Q6AUF8_ORYSJ]	34.56	2	nucleotide binding		cell communication; regulation of biological process; response to stimulus; transport	Pf00025; Pf00071; Pf05783; Pf08477	0.94316	8.06632	0.930113	19.8204	0.916358	23.3137	1.03472	7.24797	1.03918	9.56813	1.01033	4.76005	24.0711	5.89697
C6YXK7	Temperature induced lipocalin-like protein OS=Oryza sativa subsp. japonica PE=2 SV=1 - [C6YXK7_ORYSJ]	29.23	5		cytoplasm; endoplasmic reticulum; membrane; mitochondrion; vacuole	response to stimulus	Pf08212	1.0133	14.4094	0.929658	20.803	0.903202	31.7745	0.987503	10.7103	0.982859	6.57726	0.982048	20.6663	21.979	5.24951
Q0DNI8	Os03g0750700 protein OS=Oryza sativa subsp. japonica GN=Os03g0750700 PE=4 SV=2 - [Q0DNI8_ORYSJ]	19.3	5	catalytic activity	cytoplasm; endoplasmic reticulum; membrane; mitochondrion	metabolic process	Pf03088; Pf08450	0.970051	14.8252	0.9555	24.4084	0.942172	21.4885	0.948953	23.4458	1.05215	16.1006	1.04364	16.7274	44.2675	7.09326
A3BP16	Putative uncharacterized protein OS=Oryza sativa subsp. japonica GN=OsJ_25816 PE=4 SV=1 - [A3BP16_ORYSJ]	15.96	9	catalytic activity	membrane	metabolic process	Pf01565; Pf04030	0.937136	9.43032	0.884778	14.6096	0.875787	9.77262	0.980613	10.3761	1.02106	10.139	0.985155	9.9389	63.6341	6.82959
B8BBW4	Putative uncharacterized protein OS=Oryza sativa subsp. indica GN=OsI_28229 PE=3 SV=1 - [B8BBW4_ORYSI]	19.5	1	structural molecule activity	cytoplasm; cytosol; membrane; ribosome	metabolic process	Pf00366	1.0524		0.775599		0.858608		1.03833		0.828554		0.894325		17.7877	10.5649
B7ER70	cDNA clone:J023145D07, full insert sequence OS=Oryza sativa subsp. japonica PE=2 SV=1 - [B7ER70_ORYSJ]	22.96	2	enzyme regulator activity; protein binding	membrane; proteasome	metabolic process; regulation of biological process	Pf01399; Pf08375	1.00052	5.17553	1.02242	17.0875	0.985255	7.50375	0.95106	15.7934	0.925589	10.0594	0.978083	15.67	44.7404	8.60205
B9F6P7	Putative uncharacterized protein OS=Oryza sativa subsp. japonica GN=OsJ_10088 PE=4 SV=1 - [B9F6P7_ORYSJ]	14.44	1		membrane			0.926874	9.39472	0.899235	21.2323	1.01771	39.6783	1.02577	7.2742	1.03769	10.9808	1.046	11.8083	10.7465	8.25049
B8B9I4	Putative uncharacterized protein OS=Oryza sativa subsp. indica GN=OsI_28711 PE=4 SV=1 - [B8B9I4_ORYSI]	4.72	2	protein binding	membrane		Pf00168	0.996723	7.1969	0.893716	12.7219	0.999971	13.153	0.956162	4.17177	0.97105	4.06776	0.944162	6.99113	54.7659	5.5415
Q84UR8	Cold shock domain protein 2 OS=Oryza sativa subsp. japonica GN=P0582D05.112 PE=2 SV=1 - [Q84UR8_ORYSJ]	49.24	5	DNA binding; metal ion binding; RNA binding	cytoplasm; membrane; nucleus; organelle lumen	development; metabolic process; regulation of biological process; reproduction; response to stimulus	Pf00098; Pf00313; Pf08206	0.928397	20.8734	0.925674	20.5512	0.991917	30.6657	0.97287	25.97	0.91025	11.1494	0.851659	18.9687	18.6823	6.75635
Q6ZBX9	Os08g0562600 protein OS=Oryza sativa subsp. japonica GN=P0543D10.14 PE=2 SV=1 - [Q6ZBX9_ORYSJ]	18.21	4	protein binding			Pf00168	1.03601	15.0944	0.989263	14.6072	1.02463	19.773	0.89101	12.4925	0.969853	15.4375	0.975855	13.2395	30.326	4.98291
A3C1N8	Putative uncharacterized protein OS=Oryza sativa subsp. japonica GN=OsJ_30405 PE=4 SV=1 - [A3C1N8_ORYSJ]	30.69	3		cytoplasm; cytosol; membrane; nucleus; organelle lumen; ribosome		Pf03297	0.933601	6.75545	0.881051	24.3468	0.898083	19.8029	1.01335	2.48454	1.02411	5.86088	1.05071	8.06403	11.3152	10.3599
A6N098	Gpi-anchored protein (Fragment) OS=Oryza sativa subsp. indica PE=2 SV=1 - [A6N098_ORYSI]	21.97	3		membrane	cell death; cell differentiation; development; reproduction; response to stimulus		0.827592	7.45424	0.836844	7.04005	0.819729	9.91075	1.18153	17.2083	1.17643	15.163	1.13674	10.1778	14.529	7.53271
Q2R4L1	Protein kinase domain containing protein, expressed OS=Oryza sativa subsp. japonica GN=LOC_Os11g28104 PE=3 SV=2 - [Q2R4L1_ORYSJ]	10.89	5	catalytic activity; nucleotide binding	cytoplasm	metabolic process	Pf00069; Pf01657; Pf07714	1.09904	8.89044	1.14875	13.1735	1.28478	5.00001	1.0232	22.1753	0.971229	19.5284	1.05522	24.772	68.1838	7.7085
Q9AV77	60S ribosomal protein L17 OS=Oryza sativa subsp. japonica GN=OSJNBa0006L06.7 PE=2 SV=1 - [Q9AV77_ORYSJ]	50	7	structural molecule activity	cytoplasm; cytosol; nucleus; organelle lumen; ribosome	metabolic process	Pf00238	0.908383	5.46778	0.929802	12.1621	0.87097	11.9188	0.980564	9.2892	0.98887	11.9621	0.956714	14.6779	15.021	10.3892
Q8RZ83	Os01g0667600 protein OS=Oryza sativa subsp. japonica GN=OSJNBb0063G05.27 PE=2 SV=1 - [Q8RZ83_ORYSJ]	23.21	2	DNA binding; nucleotide binding	cytoplasm; membrane; nucleus	cell communication; metabolic process; regulation of biological process; response to stimulus; transport	Pf00025; Pf00071; Pf04670; Pf05783; Pf08477	0.936675	3.19397	0.875607	0.208908	0.989529	12.2981	1.02271	1.1326	1.06275	4.36105	1.05223	8.69497	24.4294	5.37646
A2XMP7	Putative uncharacterized protein OS=Oryza sativa subsp. indica GN=OsI_13813 PE=3 SV=1 - [A2XMP7_ORYSI]	16.55	3	metal ion binding; nucleotide binding; protein binding	cytoplasm	metabolic process; response to stimulus	Pf00226; Pf00684; Pf01556	0.996522	13.6402	0.868472	6.17448	0.872454	5.55542	0.904497	5.68563	0.914848	3.10655	0.93462	8.5014	46.5827	6.18896
Q84SC3	Os08g0162800 protein OS=Oryza sativa subsp. japonica GN=P0577B11.140 PE=4 SV=1 - [Q84SC3_ORYSJ]	57.14	4		cytoplasm; cytosol; membrane	response to stimulus; transport	Pf00887	0.956059	6.62288	0.971874	8.25461	1.04342	19.3424	1.06106	6.02427	0.973407	10.416	0.996862	10.0238	10.1371	5.22412
Q5ZED1	Os01g0150000 protein OS=Oryza sativa subsp. japonica GN=P0434B04.35-1 PE=2 SV=1 - [Q5ZED1_ORYSJ]	14.84	5	catalytic activity	cytoplasm; endoplasmic reticulum; membrane	metabolic process	Pf02544	0.91995	7.76259	0.938418	12.0731	0.887531	9.30737	1.01221	5.03217	1.02476	5.75508	0.998141	5.86806	35.7854	9.5542
B9FVA6	Putative uncharacterized protein OS=Oryza sativa subsp. japonica GN=OsJ_22939 PE=4 SV=1 - [B9FVA6_ORYSJ]	4.56	1	protein binding			Pf00400; Pf08324; Pf09070	1.07758	8.88159	1.14072	6.23553	1.07106	11.488	0.971907	6.7171	0.929447	18.5004	0.962239	6.77647	55.2826	5.38916
Q10N92	Os03g0278200 protein OS=Oryza sativa subsp. japonica GN=Os03g0278200 PE=4 SV=1 - [Q10N92_ORYSJ]	9.48	5	catalytic activity; nucleotide binding		cell communication; development; metabolic process; regulation of biological process; reproduction; response to stimulus; transport	Pf01073; Pf01370; Pf02719; Pf04321; Pf07993	1.02721	11.3239	1.06708	16.4769	1.07374	17.6787	0.957069	7.57953	0.914998	16.0428	0.901206	13.3632	76.0176	6.94678
Q6ZFJ5	Putative 60S ribosomal protein L9 OS=Oryza sativa subsp. japonica GN=OJ1435_F07.31 PE=4 SV=1 - [Q6ZFJ5_ORYSJ]	18.03	3	RNA binding; structural molecule activity	cytoplasm; cytosol; membrane; nucleus; organelle lumen; ribosome; vacuole	development; metabolic process	Pf00347	0.974726	7.28073	0.984397	11.1705	1.00295	9.53835	1.00498	4.83827	0.97931	6.5111	0.960395	6.95064	20.6551	9.64209
Q01I92	H0311C03.2 protein OS=Oryza sativa GN=H0311C03.2 PE=3 SV=1 - [Q01I92_ORYSA]	25	4	nucleotide binding; structural molecule activity	cytoplasm; cytosol; membrane; nucleus; organelle lumen; ribosome	metabolic process; response to stimulus	Pf00276; Pf03939	0.915663	6.55569	0.869439	5.90872	0.878384	11.9912	1.08264	10.5949	1.08676	11.1512	1.03566	7.51155	16.8996	10.2427
Q9LGQ6	Os01g0185300 protein OS=Oryza sativa subsp. japonica GN=P0510F03.18 PE=2 SV=1 - [Q9LGQ6_ORYSJ]	33.41	12	catalytic activity			Pf02458	1.02508	8.97475	0.993709	14.9129	0.972838	14.0956	0.924992	12.6786	0.972648	12.6333	0.950423	13.791	46.1363	5.92236
Q6YS11	Os08g0282400 protein OS=Oryza sativa subsp. japonica GN=B1446H11.22 PE=2 SV=1 - [Q6YS11_ORYSJ]	35.29	9	protein binding	cytoplasm; membrane; vacuole	transport		0.982459	8.34693	0.982457	11.2345	0.992132	9.80347	0.927628	9.24417	0.964218	7.70291	0.937808	8.65834	32.4651	5.17334
Q2R1M8	DEAD-box ATP-dependent RNA helicase 52C OS=Oryza sativa subsp. japonica GN=Os11g0599500 PE=3 SV=1 - [RH52C_ORYSJ]	9.95	1	catalytic activity; nucleotide binding; RNA binding			Pf00270; Pf00271	1.03451		1.18918		1.22252		1.12825		1.17451		1.34681		65.9467	8.08936
Q653F6	Putative t-complex protein 1 theta chain OS=Oryza sativa subsp. japonica GN=P0623A10.31 PE=3 SV=1 - [Q653F6_ORYSJ]	18.57	9	nucleotide binding; protein binding	cytoplasm	metabolic process; response to stimulus	Pf00118	1.00498	6.97154	0.938661	16.9051	0.930868	16.0563	0.96213	6.83581	0.978239	6.7759	0.969019	8.83196	60.2272	6.56592
Q01IF7	H0805A05.13 protein OS=Oryza sativa GN=H0805A05.13 PE=4 SV=1 - [Q01IF7_ORYSA]	21.85	8	protein binding	membrane; proteasome		Pf01399; Pf10602	0.986708	11.5059	1.01387	9.38966	1.00908	13.6352	0.994982	4.99346	1.00959	3.40869	1.00651	5.8973	44.0109	5.92236
Q9LX04	Os06g0104300 protein OS=Oryza sativa subsp. japonica GN=P0644B06.1 PE=2 SV=1 - [Q9LX04_ORYSJ]	8.77	4	catalytic activity; metal ion binding	cytoplasm	metabolic process	Pf00394; Pf07731; Pf07732	1.04096	14.525	0.986715	17.5033	1.02894	23.9903	1.05643	6.27354	1.09921	5.83187	1.13283	13.0202	65.7087	6.55127
B8BF66	Putative uncharacterized protein OS=Oryza sativa subsp. indica GN=OsI_31321 PE=4 SV=1 - [B8BF66_ORYSI]	8.06	12	protein binding; structural molecule activity	cytoplasm; membrane; mitochondrion	transport	Pf04053	1.02117	10.7559	1.01247	29.2699	1.01658	24.8664	0.998289	9.65221	1.00332	12.2947	1.03652	16.9652	176.334	8.23584
Q2QME5	Eukaryotic translation initiation factor 2 gamma subunit, putative, expressed OS=Oryza sativa subsp. japonica GN=LOC_Os12g41400 PE=4 SV=1 - [Q2QME5_ORYSJ]	14.66	6	catalytic activity; nucleotide binding; RNA binding		metabolic process	Pf00009; Pf03144; Pf09173	1.10101	9.62231	1.15362	23.386	1.18629	10.7401	1.04819	12.9878	0.986101	9.59497	0.994981	10.9552	50.7048	8.6167
B8AVK3	Putative uncharacterized protein OS=Oryza sativa subsp. indica GN=OsI_17694 PE=3 SV=1 - [B8AVK3_ORYSI]	13.97	5	catalytic activity	cytoplasm; membrane	metabolic process	Pf00112; Pf00396; Pf08246	1.16001	18.2587	1.17463	33.0399	1.05045	19.6504	1.13291	17.6045	0.987798	7.1804	1.04544	12.5179	50.1259	5.2749
A2YYM7	Putative uncharacterized protein OS=Oryza sativa subsp. indica GN=OsI_30447 PE=4 SV=1 - [A2YYM7_ORYSI]	16.42	2	protein binding; structural molecule activity	cytoplasm; Golgi; membrane; mitochondrion	transport	Pf00400; Pf04053; Pf06957	0.942439	8.90157	0.999315	42.118	0.952964	19.6558	1.02542	3.16994	0.934605	3.95993	1.00803	10.055	136.464	6.88818
A2WT17	Putative uncharacterized protein OS=Oryza sativa subsp. indica GN=OsI_03008 PE=3 SV=1 - [A2WT17_ORYSI]	6.13	1	catalytic activity; nucleotide binding	membrane; nucleus; organelle lumen	metabolic process; response to stimulus	Pf00270; Pf00271	0.975508		0.91364		0.942228		1.08092		1.14615		1.09768		40.7483	7.40088
A2XXG5	Putative uncharacterized protein OS=Oryza sativa subsp. indica GN=OsI_17371 PE=4 SV=1 - [A2XXG5_ORYSI]	5.48	2	enzyme regulator activity		cell communication; regulation of biological process; response to stimulus	Pf01369; Pf09324; Pf12783	1.14022	6.51547	1.1899	3.46742	1.1956	5.24884	0.927703	18.3239	0.968802	20.345	1.05488	30.2385	185.403	5.52881
P35685	60S ribosomal protein L7a OS=Oryza sativa subsp. japonica GN=RPL7A PE=2 SV=1 - [RL7A_ORYSJ]	41.86	13		cytoplasm; cytosol; membrane; nucleus; organelle lumen; ribosome		Pf01248	0.923245	4.32743	0.934808	12.6889	0.917778	12.9019	1.03805	9.45383	1.04524	5.29634	0.990586	8.57716	29.2855	10.3452
B7EJR0	Proteasome subunit beta type OS=Oryza sativa subsp. japonica PE=2 SV=1 - [B7EJR0_ORYSJ]	27.23	5	catalytic activity	cytoplasm; nucleus; proteasome	metabolic process; response to stimulus	Pf00227	1.04027	11.6166	1.05907	17.2071	1.0819	27.9668	1.00237	9.03048	0.977173	11.0191	1.04936	22.1434	24.2982	8.22119
Q0IPE5	2-dehydro-3-deoxyphosphooctonate aldolase, putative, expressed (Fragment) OS=Oryza sativa subsp. japonica GN=LOC_Os12g10784 PE=3 SV=1 - [Q0IPE5_ORYSJ]	16.84	4	catalytic activity	cytoplasm	metabolic process	Pf00793	1.09462	18.6559	1.06784	28.0834	1.09681	28.1543	0.977725	13.8053	0.995907	11.7698	0.936021	14.4862	31.5596	7.6792
Q651C2	Aspartic proteinase nepenthesin II-like OS=Oryza sativa subsp. japonica GN=B1274F11.42 PE=3 SV=1 - [Q651C2_ORYSJ]	14.92	6	catalytic activity	cytoplasm	metabolic process	Pf00026	0.983065	4.94183	0.955968	10.8311	0.959768	11.888	0.936922	4.43284	0.984555	10.9463	0.952728	11.3023	50.1048	5.85889
C6F1N7	TCP-1/cpn60 chaperonin OS=Oryza sativa subsp. japonica PE=2 SV=1 - [C6F1N7_ORYSJ]	17.22	9	nucleotide binding; protein binding	cytoplasm	metabolic process	Pf00118	0.971653	9.2562	0.90823	11.2393	0.964375	6.81795	0.985913	5.87232	1.00211	5.23303	0.968831	11.6091	58.7323	5.42725
Q338Z5	Os10g0377400 protein OS=Oryza sativa subsp. japonica GN=Os10g0377400 PE=2 SV=1 - [Q338Z5_ORYSJ]	31.02	3	nucleotide binding; protein binding	cytoplasm; membrane; nucleus	cell communication; regulation of biological process; response to stimulus; transport	Pf00025; Pf00071; Pf04670; Pf08477	0.981254	8.88652	0.97891	36.3893	1.03258	21.6494	1.05941	0.381121	1.05021	3.57722	1.04884	5.91495	23.7973	7.95752
B9EWS0	Putative uncharacterized protein OS=Oryza sativa subsp. japonica GN=OsJ_01779 PE=4 SV=1 - [B9EWS0_ORYSJ]	12.45	3	catalytic activity; nucleotide binding	cytoplasm	metabolic process	Pf00069; Pf07714	0.948745	6.05339	0.951406	4.95464	1.07536	19.45	0.98398	14.0677	1.05301	10.6468	1.01745	9.45206	58.7834	9.64209
B9EYD6	Putative uncharacterized protein OS=Oryza sativa subsp. japonica GN=OsJ_02855 PE=4 SV=1 - [B9EYD6_ORYSJ]	7.7	10	protein binding; structural molecule activity	cytoplasm; membrane; mitochondrion	transport	Pf04053	0.919089	4.71547	0.888421	12.2954	0.855411	11.2737	0.988243	8.43587	1.05753	7.20748	1.00236	4.24129	146.725	7.12256
Q69RL1	Os07g0468100 protein OS=Oryza sativa subsp. japonica GN=P0003B09.29 PE=2 SV=1 - [Q69RL1_ORYSJ]	17.24	4	catalytic activity; protein binding	cytoplasm; extracellular; membrane	cell communication; metabolic process; response to stimulus	Pf02798	1.12854	14.7815	1.25371	32.3789	1.33032	26.6769	0.994579	16.5562	0.834519	12.8013	0.958821	12.4781	25.81	5.12256
Q10MS5	40S ribosomal protein S7, putative, expressed OS=Oryza sativa subsp. japonica GN=Os03g0297100 PE=2 SV=1 - [Q10MS5_ORYSJ]	31.25	3	structural molecule activity	cytoplasm; cytosol; membrane; nucleus; organelle lumen; ribosome	metabolic process	Pf01251	1.06241	6.90103	1.14528	10.9386	1.10257	9.95503	0.999259	7.12225	0.904854	10.9918	0.968423	6.37166	22.169	9.78857
A2WSH0	Pleiotropic drug resistance protein 3 OS=Oryza sativa subsp. indica GN=PDR3 PE=2 SV=1 - [PDR3_ORYSI]	4.53	3	catalytic activity; nucleotide binding	membrane	metabolic process; transport	Pf00005; Pf01061; Pf08370; Pf12698	1.07591	11.9503	1.21871	24.8159	1.26156	12.3232	1.11674	15.3081	0.895976	6.16672	0.999995	8.02923	162.82	7.25439
B9F4J8	Putative uncharacterized protein OS=Oryza sativa subsp. japonica GN=OsJ_08922 PE=4 SV=1 - [B9F4J8_ORYSJ]	20.45	5	RNA binding			Pf00013	1.0968	6.50184	1.08777	15.2677	1.12713	4.14522	0.968449	5.60849	1.00325	13.5109	1.05402	4.29114	33.7101	7.18115
Q0IQK7	Non-specific lipid-transfer protein (Fragment) OS=Oryza sativa subsp. japonica GN=Os12g0115500 PE=3 SV=2 - [Q0IQK7_ORYSJ]	32.26	2		cytoplasm	transport	Pf00234	0.947967	2.71589	0.88864	5.88597	0.870586	6.98214	0.984453	3.04748	1.02234	0.745918	0.981657	3.55501	9.51591	8.99756
Q6Z6L4	Os02g0218200 protein OS=Oryza sativa subsp. japonica GN=P0027A02.7 PE=4 SV=1 - [Q6Z6L4_ORYSJ]	16.17	13	catalytic activity; metal ion binding; transporter activity	membrane	metabolic process; transport	Pf01433	1.01751	12.186	0.962319	10.1121	0.963601	16.6792	0.946345	9.6299	0.995351	10.1514	0.947066	8.65636	98.391	5.19873
A2YY59	Superoxide dismutase [Cu-Zn] OS=Oryza sativa subsp. indica GN=OsI_30285 PE=3 SV=1 - [A2YY59_ORYSI]	25.62	4	antioxidant activity; catalytic activity; metal ion binding	cytoplasm; extracellular	metabolic process; response to stimulus	Pf00080	0.944248	12.1563	0.977403	10.4798	1.05226	18.1509	1.07175	9.63754	1.06622	13.3156	1.09362	20.5066	20.5185	6.25244
P25766	Ras-related protein RGP1 OS=Oryza sativa subsp. japonica GN=RGP1 PE=2 SV=2 - [RLGP1_ORYSJ]	22.57	2	nucleotide binding; protein binding	cytoplasm; membrane	cell communication; cell differentiation; cell growth; cell organization and biogenesis; development; regulation of biological process; reproduction; response to stimulus; transport	Pf00025; Pf00071; Pf08477	0.897757	10.9428	0.891583	16.2689	0.909199	2.13978	1.07049	11.0782	1.13645	3.67444	0.951547	13.551	24.9638	7.37158
Q7XAL6	Os07g0409100 protein OS=Oryza sativa subsp. japonica GN=P0492E07.115 PE=4 SV=1 - [Q7XAL6_ORYSJ]	12.04	5	protein binding	membrane		Pf00168	1.03879	9.75582	1.0276	13.8188	0.92729	9.32774	1.00526	7.21739	0.91236	9.79709	0.929897	10.7557	55.3425	8.45557
Q9LSU0	Proteasome subunit alpha type-3 OS=Oryza sativa subsp. japonica GN=PAG1 PE=2 SV=1 - [PSA3_ORYSJ]	38.15	5	catalytic activity	cytoplasm; extracellular; membrane; nucleus; proteasome; vacuole	metabolic process; response to stimulus	Pf00227; Pf10584	1.01952	2.85957	0.928813	6.49324	0.992763	15.8375	0.966307	14.2081	0.952414	12.5207	0.946629	19.1277	27.2208	6.0874
Q6H8D7	Rev interacting-like protein-like OS=Oryza sativa subsp. japonica GN=OJ1006_A02.21-2 PE=4 SV=1 - [Q6H8D7_ORYSJ]	7.54	3	enzyme regulator activity; metal ion binding		metabolic process; regulation of biological process	Pf01412	1.08068	11.3995	1.11051	33.9788	1.24342	28.0415	0.955906	7.36729	0.904083	14.2815	1.05201	16.3257	59.3288	7.47412
Q69P55	Os09g0422000 protein OS=Oryza sativa subsp. japonica GN=OJ1740_D06.24 PE=2 SV=1 - [Q69P55_ORYSJ]	13.86	5	catalytic activity			Pf02458	0.997852	12.8702	0.981161	18.4425	0.974931	17.7356	0.937804	18.1199	0.95721	11.1242	0.886847	11.6577	47.4361	5.96045
A2ZAT2	Non-specific lipid-transfer protein OS=Oryza sativa subsp. indica GN=OsI_34868 PE=3 SV=1 - [A2ZAT2_ORYSI]	41.53	4		cytoplasm	transport	Pf00234	0.964188	7.74545	0.901889	17.2738	0.91168	11.2662	0.998564	5.59229	1.01655	12.6886	0.987498	2.15588	11.4609	9.0708
B9FT27	Putative uncharacterized protein OS=Oryza sativa subsp. japonica GN=OsJ_21210 PE=3 SV=1 - [B9FT27_ORYSJ]	9.78	4	catalytic activity; nucleotide binding	cytoplasm; membrane; mitochondrion	metabolic process	Pf00069; Pf07714; Pf11721; Pf12819	0.866362	5.89583	0.887682	6.68179	0.919977	6.65198	1.02614	4.66567	1.04275	8.69844	1.02252	4.4171	94.1748	7.1665
Q9FR35	Peroxiredoxin-2C OS=Oryza sativa subsp. japonica GN=PRXIIC PE=1 SV=1 - [PRX2C_ORYSJ]	13.58	2	antioxidant activity; catalytic activity	cytoplasm; membrane	metabolic process; response to stimulus	Pf00578; Pf08534	1.01879	6.95422	1.07197	11.0465	1.05818	12.8115	1.01826	7.32564	0.965144	13.6688	0.945494	7.77991	17.2801	5.88428
B9FAE7	Putative uncharacterized protein OS=Oryza sativa subsp. japonica GN=OsJ_09142 PE=4 SV=1 - [B9FAE7_ORYSJ]	10.34	9	transporter activity	cytoplasm; membrane	transport	Pf01602; Pf02296; Pf02883	0.967867	9.04152	0.92025	9.5762	0.94949	11.3246	0.998762	9.2746	1.06271	9.40054	1.00043	9.84683	112.447	5.5415
B9G849	Putative uncharacterized protein OS=Oryza sativa subsp. japonica GN=OsJ_31143 PE=4 SV=1 - [B9G849_ORYSJ]	7.5	4	catalytic activity	membrane	cell organization and biogenesis; metabolic process	Pf03552	0.994698	10.5654	0.990243	4.32093	1.02105	13.9881	1.02211	8.47793	1.03978	10.2215	0.994628	8.12663	69.8721	6.66846
B8A773	60S ribosomal protein L18a OS=Oryza sativa subsp. indica GN=OsI_03189 PE=3 SV=1 - [B8A773_ORYSI]	24.16	1	structural molecule activity	cytoplasm; cytosol; membrane; ribosome	metabolic process	Pf01775	0.979313	3.04615	0.954398	16.019	0.941106	10.61	1.06215	9.52427	0.987419	17.1804	0.882382	5.44788	21.3723	10.5503
Q53PH6	Expressed protein OS=Oryza sativa subsp. japonica GN=LOC_Os11g07470 PE=4 SV=1 - [Q53PH6_ORYSJ]	11.36	12		cytoplasm; membrane; nucleus	development		0.975913	15.0969	1.01081	20.4196	1.07427	19.0187	1.0029	11.4451	1.03396	11.175	1.01237	10.0462	126.975	5.90967
B9GD70	Putative uncharacterized protein OS=Oryza sativa subsp. japonica GN=OsJ_36127 PE=4 SV=1 - [B9GD70_ORYSJ]	7.15	3	catalytic activity; protein binding	membrane	metabolic process	Pf00443; Pf00917	1.03727	6.84405	0.992082	7.92621	1.0433	18.4901	0.971043	6.60081	1.03055	6.67682	0.995116	14.6085	125.906	5.89697
Q53NP8	At3g13650 OS=Oryza sativa subsp. japonica GN=Os11g0178800 PE=2 SV=1 - [Q53NP8_ORYSJ]	21.59	4		cytoplasm		Pf03018	0.94499	9.00251	0.950207	15.3795	0.903923	12.5436	1.00278	9.0059	1.02575	7.0753	0.94467	7.40019	18.0941	7.34229
Q5WMY3	60S ribosomal protein L18 OS=Oryza sativa subsp. japonica GN=P0431G05.5 PE=2 SV=1 - [Q5WMY3_ORYSJ]	42.02	4	structural molecule activity	cytoplasm; cytosol; membrane; ribosome; vacuole	metabolic process	Pf00828	0.996501	17.1841	1.09963	15.4704	0.980705	19.6449	1.06812	15.4974	1.05616	16.8316	1.12683	23.6691	21.2978	11.3999
B9EXR9	Putative uncharacterized protein OS=Oryza sativa subsp. japonica GN=OsJ_02383 PE=4 SV=1 - [B9EXR9_ORYSJ]	5.56	2		membrane		Pf04499	1.08084	12.6011	1.10682	29.5012	1.02213	18.6071	0.971643	3.59453	0.760385	6.30073	0.89194	4.95507	81.0888	4.52588
A2YBW4	Putative uncharacterized protein OS=Oryza sativa subsp. indica GN=OsI_22594 PE=3 SV=1 - [A2YBW4_ORYSI]	21.21	1	catalytic activity		metabolic process	Pf00201	1.04711	8.66673	1.01361	9.76644	1.1437	13.9248	0.919672	6.69261	0.973952	4.85193	0.938385	10.6046	51.5707	6.25244
Q9AUU6	Putative uncharacterized protein OSJNBa0040E01.6 OS=Oryza sativa subsp. japonica GN=OSJNBa0040E01.6 PE=4 SV=1 - [Q9AUU6_ORYSJ]	20.43	1				Pf03669	1.12264	32.3292	1.36648	12.2135	1.33844	35.0816	1.02216	20.175	1.19657	36.9621	0.897679	37.1242	9.95398	8.49951
Q9LSU1	Proteasome subunit alpha type-5 OS=Oryza sativa subsp. japonica GN=PAE1 PE=2 SV=1 - [PSA5_ORYSJ]	25.32	5	catalytic activity	cytoplasm; cytosol; membrane; nucleus; proteasome; ribosome	metabolic process; response to stimulus	Pf00227; Pf10584	0.981038	2.6419	0.904339	19.4603	0.870734	13.3848	0.907802	11.0742	0.949293	6.41095	0.841804	14.4897	25.977	4.75439
A2Z736	Putative uncharacterized protein OS=Oryza sativa subsp. indica GN=OsI_33510 PE=4 SV=1 - [A2Z736_ORYSI]	15.25	1					1.14493	50.8656	1.37257	56.1165	1.16315	36.9229	1.06763	14.9362	1.08619	19.8689	1.05783	22.5828	12.8451	5.78271
Q7XM17	OSJNBa0084K01.14 protein OS=Oryza sativa subsp. japonica GN=OSJNBa0084K01.14 PE=4 SV=2 - [Q7XM17_ORYSJ]	13.44	11	protein binding			Pf06075	0.810874	16.6358	0.818092	23.827	0.872964	34.8341	1.10532	3.78337	1.07247	14.6574	1.09664	18.0267	98.4473	4.90674
Q0IZQ4	Os09g0556200 protein OS=Oryza sativa subsp. japonica GN=Os09g0556200 PE=4 SV=2 - [Q0IZQ4_ORYSJ]	8.21	4	protein binding	cytoplasm; vacuole		Pf00564	0.981665	9.46634	1.13879	16.0851	1.29664	37.6992	0.907057	29.735	0.898292	9.97569	0.987183	19.9224	73.9399	5.23682
A2Y963	Putative uncharacterized protein OS=Oryza sativa subsp. indica GN=OsI_21602 PE=4 SV=1 - [A2Y963_ORYSI]	11.42	4	protein binding; structural molecule activity	cytoplasm; membrane	transport	Pf00400; Pf04053	0.943516	10.2873	0.940416	9.47761	1.0113	18.8508	0.994051	6.54555	1.00226	8.2764	0.998676	9.4222	102.094	4.95752
Q94EF2	Os01g0770000 protein OS=Oryza sativa subsp. japonica GN=P0665A11.11 PE=2 SV=1 - [Q94EF2_ORYSJ]	7.72	4	catalytic activity			Pf03007; Pf06974	0.925912	14.7572	0.889624	13.1884	0.87637	14.4085	0.997306	6.99908	0.977958	7.17048	0.942816	9.94897	56.5011	7.47412
B9GBE8	Putative uncharacterized protein OS=Oryza sativa subsp. japonica GN=OsJ_34931 PE=3 SV=1 - [B9GBE8_ORYSJ]	9.68	10	catalytic activity; nucleotide binding	membrane	metabolic process	Pf00899; Pf02134; Pf09358; Pf10585	1.01912	24.1109	1.12418	27.746	1.05021	38.3468	1.00428	14.0163	0.980687	17.4477	1.02271	15.6783	118.851	5.37646
I3RJI6	Mitogen-activated protein kinase kinase 4 OS=Oryza sativa subsp. indica GN=MKK4 PE=2 SV=1 - [I3RJI6_ORYSI]	12.2	4	catalytic activity; nucleotide binding	membrane	metabolic process	Pf00069; Pf07714	1.06558	19.6765	1.08263	20.8739	0.996331	19.4191	0.956186	17.0249	0.936038	4.71698	0.99548	20.4148	40.0775	9.45166
Q7XEH4	Expressed protein OS=Oryza sativa subsp. japonica GN=LOC_Os10g28610 PE=1 SV=1 - [Q7XEH4_ORYSJ]	7.18	15	catalytic activity; motor activity; protein binding	chromosome; cytoplasm; cytoskeleton; extracellular; membrane; nucleus; organelle lumen	cell organization and biogenesis; cellular component movement; development; metabolic process; regulation of biological process; reproduction	Pf00038; Pf01576; Pf02463; Pf03961; Pf04156; Pf04582; Pf05483; Pf05557; Pf05622; Pf05667; Pf06008; Pf06160; Pf07106; Pf07765; Pf07888; Pf08317; Pf09726; Pf09789; Pf10186; Pf12128	0.937903	7.54421	0.912986	13.7266	0.934578	13.0037	1.03749	9.56273	1.01879	12.6868	1.03617	6.0448	231.297	4.91943
Q9LWS2	60S ribosomal protein L13 OS=Oryza sativa subsp. japonica GN=P0541H01.38 PE=2 SV=1 - [Q9LWS2_ORYSJ]	28.85	1	structural molecule activity	cytoplasm; cytosol; membrane; nucleus; organelle lumen; ribosome	metabolic process	Pf01294	0.876466	20.6746	0.940688	15.019	1.05299	1.70694	1.01529	4.68829	1.03783	21.2604	0.96983	16.3877	24.0392	10.9897
Q6L4F8	Guanine nucleotide-binding protein subunit beta-like protein B OS=Oryza sativa subsp. japonica GN=RACK1B PE=1 SV=1 - [GBLPB_ORYSJ]	11.01	1	protein binding; signal transducer activity	cytoplasm; cytosol; nucleus; organelle lumen; ribosome	cell communication; development; regulation of biological process; response to stimulus	Pf00400	0.969858	6.01272	0.869576	8.95998	0.866238	9.46672	1.03827	9.56717	1.03776	9.80573	1.02668	11.8854	36.4291	6.53662
Q67UP9	Probable protein phosphatase 2C 58 OS=Oryza sativa subsp. japonica GN=Os06g0651600 PE=2 SV=1 - [P2C58_ORYSJ]	10.05	3	catalytic activity; metal ion binding		metabolic process	Pf00481	1.1544	21.715	1.32492	27.6867	1.18726	21.6782	1.09172	12.1267	1.01413	29.5993	1.09917	34.6374	40.5654	5.09717
Q6H660	Os02g0644100 protein OS=Oryza sativa subsp. japonica GN=OJ1282_H11.17 PE=4 SV=1 - [Q6H660_ORYSJ]	19.2	9	protein binding	cytoplasm; cytosol; membrane; nucleus	response to stimulus	Pf00515	1.02956	6.81332	0.926812	15.3155	0.958922	23.757	0.957134	11.9426	0.967356	9.2185	1.00456	22.5744	64.8737	6.37939
B8BBN7	Putative uncharacterized protein OS=Oryza sativa subsp. indica GN=OsI_28170 PE=4 SV=1 - [B8BBN7_ORYSI]	23.6	9	nucleotide binding; transporter activity	membrane	response to stimulus; transport	Pf01926; Pf02421; Pf06071	1.0307	8.90228	1.06051	17.2989	1.08721	11.9804	1.02793	9.2098	0.999019	5.95098	1.00736	9.43118	44.3189	6.75635
Q9FTY4	Os01g0104400 protein OS=Oryza sativa subsp. japonica GN=P0436E04.19 PE=2 SV=1 - [Q9FTY4_ORYSJ]	13.06	3		cytoplasm			0.987639	7.98533	1.02112	14.375	1.00539	7.57597	0.969454	11.9193	0.955426	12.3399	0.96316	3.58642	30.1273	6.771
B8B874	Coatomer subunit gamma OS=Oryza sativa subsp. indica GN=OsI_25286 PE=3 SV=1 - [B8B874_ORYSI]	12.04	4	structural molecule activity	cytoplasm; Golgi; membrane	transport	Pf01602; Pf08752	0.964261	5.66688	0.994613	4.11446	0.948715	7.62487	0.962686	8.15507	1.07102	12.6763	0.994974	7.28394	98.5019	5.13525
Q6K3Z3	Putative acetyl-CoA C-acyltransferase OS=Oryza sativa subsp. japonica GN=P0574F11.13 PE=2 SV=1 - [Q6K3Z3_ORYSJ]	12.97	4	catalytic activity	cytoplasm; membrane	metabolic process	Pf00108; Pf02803	0.983867	11.1395	1.04284	12.6048	1.01824	17.6668	0.872798	11.5132	0.95149	15.879	0.930859	12.5871	40.9983	6.56592
A2X9Q4	Annexin OS=Oryza sativa subsp. indica GN=Ann2 PE=2 SV=1 - [A2X9Q4_ORYSI]	24.52	7	metal ion binding			Pf00191	1.04111	7.67019	1.07454	12.0964	1.04567	17.8473	0.984647	10.1367	0.929584	16.6514	0.962266	12.0804	35.4606	7.54736
Q69RN2	Chitinase III-like protein OS=Oryza sativa subsp. japonica GN=OSJNBb0055I24.131 PE=1 SV=1 - [Q69RN2_ORYSJ]	21.97	3	protein binding			Pf00168	0.940633	18.9968	0.967768	17.4422	0.891157	16.1419	1.03058	21.5139	0.960223	15.363	0.911615	14.9044	18.9051	7.06396
Q0DJ99	Coatomer subunit delta-2 OS=Oryza sativa subsp. japonica GN=Os05g0311000 PE=2 SV=1 - [COPD2_ORYSJ]	22.75	3	protein binding	cytoplasm; Golgi; membrane	transport	Pf00928	0.937399	4.42407	0.965975	3.69276	1.24222	16.8472	1.00765	9.33566	1.01896	1.00708	1.20058	13.7068	57.4664	5.85889
Q6AUA1	Putative systemin receptor SR160 OS=Oryza sativa subsp. japonica GN=P0017D10.20 PE=4 SV=1 - [Q6AUA1_ORYSJ]	12.85	6	catalytic activity; nucleotide binding; protein binding	cytoplasm; membrane	defense response; metabolic process; regulation of biological process; response to stimulus	Pf00069; Pf07714; Pf08263	0.993198	4.18064	0.982486	7.21544	0.961265	9.53399	1.01529	7.30043	0.995226	8.64095	0.953162	5.38238	67.1935	7.7085
Q339K4	Os10g0346600 protein OS=Oryza sativa subsp. japonica GN=OSJNBa0045C13.16 PE=4 SV=1 - [Q339K4_ORYSJ]	13	5	metal ion binding	cytoplasm; Golgi; membrane; vacuole		Pf02225	0.942692	18.8454	0.977393	36.8667	0.971907	7.99726	1.04303	1.65749	1.03112	10.1683	1.0548	21.5348	69.9818	6.0874
Q657X5	Os01g0108000 protein OS=Oryza sativa subsp. japonica GN=P0005A05.37 PE=4 SV=1 - [Q657X5_ORYSJ]	8.84	5					1.00064	19.1457	0.889852	33.5154	0.890543	32.3417	1.00548	15.9338	1.12559	6.29933	1.03132	11.0659	84.0284	6.12549
Q5Z6U5	Os06g0538000 protein OS=Oryza sativa subsp. japonica GN=P0551A03.30 PE=2 SV=1 - [Q5Z6U5_ORYSJ]	18.64	9	nucleotide binding; protein binding	cytoplasm	metabolic process	Pf00118	0.999302	13.8365	1.01492	19.0141	0.993282	20.3373	0.987672	20.9882	0.994554	12.7248	0.916541	17.1745	60.8599	6.65381
A6N0I8	Elongation factor 1-alpha (Fragment) OS=Oryza sativa subsp. indica PE=2 SV=1 - [A6N0I8_ORYSI]	44.9	1	nucleotide binding; RNA binding	cytoplasm; membrane; mitochondrion; nucleus; organelle lumen; vacuole	metabolic process; response to stimulus	Pf03143	1.01403	7.25233	0.808214	5.44683	0.990763	9.39169	0.972364	4.13352	0.884064	11.6982	1.08821	15.031	5.35698	10.0962
Q60EX6	Serine/threonine-protein phosphatase BSL1 homolog OS=Oryza sativa subsp. japonica GN=BSL1 PE=2 SV=1 - [BSL1_ORYSJ]	11.44	7	catalytic activity; metal ion binding; protein binding	nucleus		Pf00149	0.905373	8.20455	0.98708	27.3387	0.972415	9.43353	1.01031	7.63268	1.09696	12.9231	1.05745	16.4108	96.2212	6.34131
Q94LL8	Putative uncharacterized protein OSJNBb0024A20.12 OS=Oryza sativa GN=OSJNBb0024A20.12 PE=4 SV=1 - [Q94LL8_ORYSA]	21.74	2		cytoplasm		Pf07876	1.01397	6.94672	0.9818	12.7635	0.927372	6.85672	0.901609	12.1226	0.906872	17.3985	0.905335	14.5356	23.2753	6.32861
Q5QNI2	Os01g0212400 protein OS=Oryza sativa subsp. japonica GN=P0031E09.40 PE=2 SV=1 - [Q5QNI2_ORYSJ]	8.22	5	metal ion binding	cytoplasm; membrane; vacuole	transport	Pf01699	0.925708	13.2458	1.00658	13.4499	0.958932	12.7081	1.04425	9.01859	1.07302	10.4317	1.07385	7.66992	63.2811	6.34131
A2Y727	Putative uncharacterized protein OS=Oryza sativa subsp. indica GN=OsI_20842 PE=4 SV=1 - [A2Y727_ORYSI]	10.48	5		cytoplasm; endoplasmic reticulum; membrane; nucleus	cell division; response to stimulus		0.989079	4.10016	0.919144	9.3945	0.87774	6.58419	0.942183	10.3555	0.993862	8.79673	0.980264	13.4995	59.615	4.61475
Q8H852	Coatomer subunit gamma-1 OS=Oryza sativa subsp. japonica GN=Os03g0227000 PE=2 SV=2 - [COPG1_ORYSJ]	11.76	4	structural molecule activity	cytoplasm; Golgi; membrane	transport	Pf01602; Pf08752	1.04616	15.4228	1.03417	1.73629	1.01904	4.08189	0.996382	4.68645	0.952349	6.00163	1.01401	5.89354	98.5438	5.21143
Q6ZI53	Elongation factor Tu OS=Oryza sativa subsp. japonica GN=OJ1126_D09.31-1 PE=2 SV=1 - [Q6ZI53_ORYSJ]	14.99	7	catalytic activity; nucleotide binding; RNA binding	cytoplasm; extracellular; membrane; nucleus; organelle lumen	metabolic process	Pf00009; Pf03143; Pf03144	0.925663	6.6383	0.84536	9.55815	0.870198	12.0725	0.992801	13.6327	1.07869	4.89206	0.960693	4.89459	50.3818	6.63916
Q8H3X4	Os07g0107300 protein OS=Oryza sativa subsp. japonica GN=P0585H11.104 PE=2 SV=1 - [Q8H3X4_ORYSJ]	8.3	2		cytoplasm		Pf03018	0.947549	7.02055	0.95096	15.8431	0.954332	14.6672	1.00886	16.5252	1.02899	15.4086	0.965876	11.4973	23.1334	5.75732
B7E8Y8	cDNA clone:001-119-H04, full insert sequence OS=Oryza sativa subsp. japonica PE=2 SV=1 - [B7E8Y8_ORYSJ]	7.14	2	catalytic activity; nucleotide binding	cytoplasm; cytosol; extracellular; membrane; mitochondrion; ribosome	metabolic process; response to stimulus	Pf00120; Pf03951	0.988983	7.29037	0.89604	7.55031	0.908885	7.83187	0.990406	5.97554	0.972278	17.0266	0.946389	9.19973	35.1155	6.55127
P93425	TMK protein OS=Oryza sativa GN=TMK PE=2 SV=1 - [P93425_ORYSA]	9.25	7	catalytic activity; nucleotide binding; receptor activity; signal transducer activity	cytoplasm; membrane; mitochondrion	cell communication; development; metabolic process; regulation of biological process; response to stimulus	Pf00069; Pf01636; Pf07714	0.846939	11.1326	0.828797	10.4195	0.919392	20.1567	1.14658	12.8178	1.14858	5.98243	1.09461	5.03918	101.539	6.41748
A2WJQ6	Putative uncharacterized protein OS=Oryza sativa subsp. indica GN=OsI_00053 PE=4 SV=1 - [A2WJQ6_ORYSI]	21.07	6	catalytic activity; nucleotide binding	membrane	metabolic process; response to stimulus	Pf01073; Pf01370; Pf05368; Pf08659	1.00843	8.18696	0.992151	5.65491	1.02546	10.5747	0.956958	7.38165	0.951266	8.03342	0.940552	9.61849	34.2997	6.75635
Q40723	Ras-related protein RGP2 OS=Oryza sativa subsp. japonica GN=RGP2 PE=2 SV=2 - [RLGP2_ORYSJ]	19.35	2	nucleotide binding	cytoplasm; endosome; membrane; nucleus	cell communication; regulation of biological process; response to stimulus; transport	Pf00025; Pf00071; Pf04670; Pf08477	0.968275	5.41248	0.822494	8.28857	0.845034	8.84482	0.964315	2.95765	1.0107	1.8929	0.971158	3.26188	23.7751	7.98682
Q10G12	Expressed protein OS=Oryza sativa subsp. japonica GN=LOC_Os03g44560 PE=2 SV=1 - [Q10G12_ORYSJ]	18.78	5		cytoplasm; membrane			0.937397	6.6775	0.89121	7.78762	0.878286	8.5328	1.01687	5.61481	1.03779	9.24344	0.981665	7.65752	26.058	8.74854
H9N012	Betaine aldehyde dehydrogenase (Fragment) OS=Oryza sativa GN=Badh2 PE=3 SV=1 - [H9N012_ORYSA]	17.66	6	catalytic activity		metabolic process	Pf00171	1.08117	9.52284	1.01772	18.2106	1.00643	15.848	0.926942	14.714	0.920867	12.4841	0.885609	14.3563	45.7859	4.98291
Q0DJ75	Os05g0318700 protein (Fragment) OS=Oryza sativa subsp. japonica GN=Os05g0318700 PE=3 SV=1 - [Q0DJ75_ORYSJ]	7.39	2	catalytic activity; nucleotide binding	cytoplasm	metabolic process	Pf00069; Pf07714; Pf11721; Pf12819	0.981334	8.04862	0.947097	2.47436	1.10639	38.7466	0.967068	0.115531	0.951007	5.0236	1.10036	29.1817	87.426	8.51416
Q2QX92	WD repeat domain 48, putative, expressed OS=Oryza sativa subsp. japonica GN=LOC_Os12g06810 PE=4 SV=1 - [Q2QX92_ORYSJ]	10.07	6	protein binding		development	Pf00400; Pf11816	1.01071	13.0824	1.15526	23.1297	1.10365	17.0237	0.998947	13.035	1.0242	16.9791	1.0157	11.9099	80.7922	6.94678
Q6YUV4	Os02g0189000 protein OS=Oryza sativa subsp. japonica GN=OSJNBb0031B09.3 PE=2 SV=1 - [Q6YUV4_ORYSJ]	13.7	2	structural molecule activity	cytoplasm; ribosome	metabolic process	Pf01165	0.99031	6.98157	0.937265	3.52859	0.991196	13.2702	0.9959	6.52482	1.06119	6.60204	0.970877	3.72764	16.7248	10.3892
A2WMA1	Putative uncharacterized protein OS=Oryza sativa subsp. indica GN=OsI_00974 PE=4 SV=1 - [A2WMA1_ORYSI]	8.6	2		cytoplasm; endoplasmic reticulum		Pf02453	0.85546	9.28993	0.755439	12.7735	0.765658	1.77067	1.14742	8.86847	1.07677	4.33115	1.07731	4.1795	30.5533	7.48877
Q2QXN5	60S ribosomal protein L26-1, putative, expressed OS=Oryza sativa subsp. japonica GN=LOC_Os12g05430 PE=1 SV=1 - [Q2QXN5_ORYSJ]	17.33	4	structural molecule activity	cytoplasm; mitochondrion; ribosome	metabolic process	Pf00467	0.873824	6.82369	0.846332	13.1051	0.8174	14.4507	0.967548	11.6224	0.935609	18.1404	0.909382	18.2012	16.9203	11.0044
Q67UE5	Putative formate--tetrahydrofolate ligase OS=Oryza sativa subsp. japonica GN=OJ1596_C06.3 PE=3 SV=1 - [Q67UE5_ORYSJ]	11.74	7	catalytic activity; metal ion binding; nucleotide binding	cytoplasm; extracellular; membrane	metabolic process; response to stimulus	Pf01268	1.00084	7.11052	0.988094	16.3469	0.923862	11.6746	0.937136	10.2542	0.972821	7.64181	0.938351	12.6993	68.0691	7.00537
A6N1F8	Isopentenyl pyrophosphate: dimethyllallyl pyrophosphate isomerase (Fragment) OS=Oryza sativa subsp. indica PE=2 SV=1 - [A6N1F8_ORYSI]	20.9	4	catalytic activity	cytoplasm; cytosol; mitochondrion	development; metabolic process; reproduction	Pf00293	1.01661	6.55534	0.957359	7.73731	1.00827	10.9813	0.947588	6.74557	0.943178	7.92868	0.910673	5.46016	23.388	5.80811
B9FRR9	Putative uncharacterized protein OS=Oryza sativa subsp. japonica GN=OsJ_20291 PE=4 SV=1 - [B9FRR9_ORYSJ]	16.67	2	structural molecule activity	cytoplasm; cytosol; nucleus; organelle lumen; ribosome	metabolic process	Pf04758	0.948475	5.15237	0.841077	9.79708	0.836323	10.8274	0.983485	8.8854	1.03994	8.71934	0.932249	4.59027	19.172	10.7554
B8AP14	Putative uncharacterized protein OS=Oryza sativa subsp. indica GN=OsI_11410 PE=3 SV=1 - [B8AP14_ORYSI]	6.15	3	catalytic activity; nucleotide binding	membrane	metabolic process	Pf00069; Pf07714; Pf12799	0.928514	5.29713	0.904517	18.1457	0.896334	9.96962	0.953933	2.56066	1.00498	11.6068	0.955466	3.53317	106.656	7.15186
Q84S63	Putative serine/threonine kinase protein OS=Oryza sativa subsp. japonica GN=P0458H05.129 PE=4 SV=1 - [Q84S63_ORYSJ]	6.3	1	catalytic activity; nucleotide binding	cytoplasm; mitochondrion	metabolic process	Pf00069; Pf01657; Pf07714	0.988981		1.14433		1.22925		0.783054		0.698981		0.699401		75.412	6.34131
B8ANQ0	Putative uncharacterized protein OS=Oryza sativa subsp. indica GN=OsI_14352 PE=4 SV=1 - [B8ANQ0_ORYSI]	20.32	9	protein binding	cytoplasm; nucleus; proteasome	development	Pf01399	0.949565	5.79309	0.923991	10.5655	0.952094	7.89521	0.992055	8.3122	1.02461	10.2135	0.977157	5.2405	50.5867	7.85498
A6N1A8	Serine-glyoxylate aminotransferase (Fragment) OS=Oryza sativa subsp. indica PE=2 SV=1 - [A6N1A8_ORYSI]	23.23	3	catalytic activity		metabolic process	Pf00266	1.11353	17.0691	1.19055	8.66321	1.17615	6.43536	1.07243	11.1395	0.998859	7.39654	1.02476	10.7746	21.8722	5.5542
Q5VME5	Os06g0289900 protein OS=Oryza sativa subsp. japonica GN=B1026E06.3 PE=2 SV=1 - [Q5VME5_ORYSJ]	20.17	1	catalytic activity		metabolic process	Pf00201	1.15854		1.13595		1.15622		0.786717		0.723895		0.705275		51.4507	6.25244
Q7Y0C6	Os03g0765800 protein OS=Oryza sativa subsp. japonica GN=OSJNBa0079B15.16 PE=4 SV=1 - [Q7Y0C6_ORYSJ]	7.91	6	catalytic activity	membrane	metabolic process		0.972259	11.6646	0.915642	17.8081	0.958866	6.78616	0.976662	7.65409	0.952821	7.23335	1.01813	6.87764	102.399	5.5542
Q6I608	Os05g0556900 protein OS=Oryza sativa subsp. japonica GN=OJ1214_E03.11 PE=1 SV=1 - [Q6I608_ORYSJ]	33.33	3	structural molecule activity	cytoplasm; cytosol; membrane; mitochondrion; ribosome	metabolic process	Pf01247	0.884088	2.54209	0.813745	5.73207	0.754414	9.57465	0.981326	4.46799	0.983001	6.53325	0.91459	7.41727	12.6527	10.6528
B9F2B8	Putative uncharacterized protein OS=Oryza sativa subsp. japonica GN=OsJ_08115 PE=3 SV=1 - [B9F2B8_ORYSJ]	12.44	9	nucleotide binding	cytoplasm; membrane		Pf00012	0.948003	11.5973	1.06508	14.3472	1.0005	25.9717	1.01729	9.73782	1.05023	8.4131	1.02628	14.0041	98.0988	5.59229
A3AX85	Putative uncharacterized protein OS=Oryza sativa subsp. japonica GN=OsJ_16095 PE=4 SV=1 - [A3AX85_ORYSJ]	8.14	7	enzyme regulator activity	proteasome	metabolic process; regulation of biological process	Pf01851	0.950916	9.43284	0.958719	16.2859	0.954713	9.70338	1.00087	11.3074	1.01871	12.326	0.970459	8.52455	109.128	5.2876
Q652L6	Os09g0567300 protein OS=Oryza sativa subsp. japonica GN=OJ1155_H10.27 PE=4 SV=1 - [Q652L6_ORYSJ]	22.07	6	catalytic activity		metabolic process	Pf00070; Pf04820; Pf07992	1.07205	6.5671	0.983228	12.3461	0.964284	10.439	0.801377	15.7204	0.842385	9.47656	0.799452	14.3176	46.6441	5.70654
B8B2F2	Putative uncharacterized protein OS=Oryza sativa subsp. indica GN=OsI_23019 PE=3 SV=1 - [B8B2F2_ORYSI]	17.82	7	catalytic activity; nucleotide binding	cytoplasm; mitochondrion	metabolic process; response to stimulus	Pf00389; Pf02826	0.892042	6.37636	0.869926	19.6918	0.846491	9.31755	1.15176	15.3568	1.08949	10.7834	1.07141	13.7419	41.3062	7.13721
Q6K5R6	Os02g0478600 protein OS=Oryza sativa subsp. japonica GN=P0527E02.35 PE=2 SV=1 - [Q6K5R6_ORYSJ]	30	5	structural molecule activity	cytoplasm; cytosol; membrane; ribosome	metabolic process	Pf00410	0.954164	11.3456	0.974663	13.2069	0.924905	7.87849	1.02558	8.82065	1.08699	8.37452	1.02986	9.16488	14.8089	9.93506
B8AZR2	Putative uncharacterized protein OS=Oryza sativa subsp. indica GN=OsI_20525 PE=4 SV=1 - [B8AZR2_ORYSI]	11.74	2		membrane	transport	Pf04144	0.947771	11.6685	0.958568	6.17714	0.938236	18.1432	1.08603	8.11535	1.14105	12.4185	1.05261	10.9226	31.5074	7.89893
B8BB68	Putative uncharacterized protein OS=Oryza sativa subsp. indica GN=OsI_28003 PE=3 SV=1 - [B8BB68_ORYSI]	10.42	2	catalytic activity; nucleotide binding; protein binding	cytoplasm; membrane	metabolic process	Pf00069; Pf07714; Pf08263; Pf12799	0.954287	4.54928	0.929033	28.4287	0.969433	24.6973	1.01495	4.93074	1.03062	7.9725	1.0106	11.2054	68.6185	6.20166
Q10LR6	Ribosomal protein L19 OS=Oryza sativa subsp. japonica GN=Os03g0337800 PE=2 SV=1 - [Q10LR6_ORYSJ]	28.37	2	structural molecule activity	cytoplasm; cytosol; membrane; mitochondrion; nucleus; organelle lumen; ribosome	metabolic process	Pf01280	0.840023	23.5307	0.929223	8.18913	0.989845	16.9712	1.02177	0.922921	1.08287	12.1198	1.01049	8.86034	24.1264	11.3853
Q94LY4	Sec31p OS=Oryza sativa GN=SEC31 PE=2 SV=1 - [Q94LY4_ORYSA]	15.54	14	protein binding	membrane		Pf00400; Pf03154; Pf04652; Pf07223; Pf07271; Pf09770; Pf12931	1.03999	14.5581	0.993851	13.4124	0.955707	17.3444	1.02719	11.3185	1.01333	14.287	0.991273	16.5466	110.98	5.49072
Q943F3	60S ribosomal protein L18a OS=Oryza sativa subsp. japonica GN=RPL18A PE=2 SV=1 - [RL18A_ORYSJ]	24.16	1	structural molecule activity	cytoplasm; cytosol; membrane; ribosome	metabolic process	Pf01775	1.01555	2.2086	1.08359	2.06396	0.95436	16.0968	1.11964	12.2952	1.11063	4.32865	1.06804	14.2868	21.3864	10.4478
Q8W3N8	26S proteasome regulatory particle triple-A ATPase subunit4b (Fragment) OS=Oryza sativa subsp. japonica GN=OsRPT4b PE=2 SV=1 - [Q8W3N8_ORYSJ]	16.18	5	catalytic activity; nucleotide binding; protein binding; RNA binding	cytoplasm; membrane; nucleus; organelle lumen; proteasome	metabolic process; regulation of biological process; reproduction; response to stimulus	Pf00004; Pf00006; Pf00158; Pf00910; Pf01057; Pf01078; Pf05496; Pf06068; Pf07724; Pf07726; Pf07728	1.0325	4.2637	1.16076	25.2665	1.00261	9.34272	0.998173	4.76321	0.926783	9.43695	0.933803	5.59883	41.98	7.81104
Q6YUR8	Cold shock domain protein 1 OS=Oryza sativa subsp. japonica GN=OSJNBb0088N06.21 PE=2 SV=1 - [Q6YUR8_ORYSJ]	15.77	3	DNA binding; metal ion binding		metabolic process; regulation of biological process	Pf00313	0.920838	3.28911	0.942842	15.987	0.963544	13.1407	0.927626	9.44655	0.896922	2.85072	0.841001	8.06508	22.7089	7.06396
B9FXP5	Putative uncharacterized protein OS=Oryza sativa subsp. japonica GN=OsJ_24584 PE=3 SV=1 - [B9FXP5_ORYSJ]	11.36	3	catalytic activity; nucleotide binding	membrane	metabolic process	Pf00069; Pf01657; Pf07714	1.06368	19.1275	1.13517	15.1323	1.14331	28.6596	1.10036	8.09578	0.976505	0.105512	1.01015	1.4855	68.2336	7.95752
Q7XPR2	Aminomethyltransferase OS=Oryza sativa subsp. japonica GN=OSJNBa0053K19.11 PE=3 SV=2 - [Q7XPR2_ORYSJ]	8.58	3	catalytic activity	cytoplasm; cytosol; extracellular; membrane; mitochondrion; ribosome	metabolic process; response to stimulus	Pf01571; Pf08669	0.954398	11.074	0.993441	22.6176	1.0888	19.8014	1.06469	8.1692	1.07779	6.5188	1.23422	24.4056	43.9405	8.30908
A2Y3J4	Putative uncharacterized protein OS=Oryza sativa subsp. indica GN=OsI_19576 PE=4 SV=1 - [A2Y3J4_ORYSI]	19.68	3	catalytic activity; nucleotide binding		metabolic process	Pf01073; Pf01370; Pf07993	1.09548	5.29423	1.04531	3.68453	1.09794	15.1836	0.799458	18.0362	0.839136	11.2497	0.991805	6.69464	42.1288	6.17627
Q84P96	3-ketoacyl-CoA thiolase-like protein OS=Oryza sativa subsp. japonica GN=OJ1136_C12.17 PE=2 SV=1 - [Q84P96_ORYSJ]	16.07	6	catalytic activity	cytoplasm; membrane; mitochondrion; nucleus; organelle lumen; vacuole	cell organization and biogenesis; metabolic process	Pf00108; Pf02803	0.84248	30.8736	0.868014	34.9761	0.981231	31.527	1.10088	11.7275	1.05223	20.2152	1.09508	14.0194	46.8	8.14795
B8A7L3	Putative uncharacterized protein OS=Oryza sativa subsp. indica GN=OsI_03279 PE=4 SV=1 - [B8A7L3_ORYSI]	7.63	2	catalytic activity	membrane	metabolic process	Pf00501	0.885985	12.0196	0.887799	5.39351	0.978463	16.6508	0.812395	0.485943	0.930828	1.47829	0.854529	21.3513	68.0804	6.31592
Q01HF3	OSIGBa0157K09-H0214G12.4 protein OS=Oryza sativa GN=OSIGBa0157K09-H0214G12.4 PE=4 SV=1 - [Q01HF3_ORYSA]	5.82	2	transporter activity	membrane	transport	Pf00909	1.21156	5.23145	1.37217	11.6141	1.40671	31.2404	0.932667	26.407	1.00214	2.2806	0.906433	54.3979	52.6296	7.26904
A2Y116	Putative uncharacterized protein OS=Oryza sativa subsp. indica GN=OsI_18700 PE=3 SV=1 - [A2Y116_ORYSI]	6.57	1	nucleotide binding	membrane	response to stimulus	Pf00012	0.9674		0.850914		0.964896		0.900822		0.88094		0.916111		94.0238	4.94482
B9FXT7	Serine/threonine-protein kinase OS=Oryza sativa subsp. japonica GN=OsJ_24675 PE=4 SV=1 - [B9FXT7_ORYSJ]	12.56	6	catalytic activity; nucleotide binding; protein binding	membrane	cell communication; metabolic process; reproduction	Pf00069; Pf00954; Pf01453; Pf07714; Pf08276	0.918739	3.95248	0.855596	7.22505	0.892784	4.66545	0.944527	7.32584	1.03642	3.82683	0.931246	13.1204	93.7648	7.76709
A2ZHF9	Putative uncharacterized protein OS=Oryza sativa subsp. indica GN=OsI_37230 PE=4 SV=1 - [A2ZHF9_ORYSI]	20.67	4	catalytic activity		metabolic process; response to stimulus	Pf02431	1.0968	8.01993	1.07317	15.8549	1.05747	10.9084	0.820184	14.4981	0.828538	4.75548	0.844836	19.0984	23.176	4.94482
Q652A2	Os09g0527600 protein OS=Oryza sativa subsp. japonica GN=OJ1439_F07.26 PE=2 SV=1 - [Q652A2_ORYSJ]	11.72	1	catalytic activity; nucleotide binding	cytoplasm; endosome; nucleus	cell communication; regulation of biological process; response to stimulus; transport	Pf00009; Pf00025; Pf00071; Pf08477	0.948652		0.888791		0.892363		0.830047		0.974017		0.914636		26.2903	5.31299
Q8LHP5	Os07g0634200 protein OS=Oryza sativa subsp. japonica GN=P0455H11.113 PE=2 SV=1 - [Q8LHP5_ORYSJ]	13.64	1	nucleotide binding	cytoplasm; membrane; nucleus	cell communication; regulation of biological process; response to stimulus; transport	Pf00025; Pf00071; Pf04670; Pf08477	0.96413		0.878832		0.959721		0.898885		0.93698		0.900694		24.4702	5.98584
Q8H8S1	Ribosomal protein L15 OS=Oryza sativa subsp. japonica GN=OJ1523_A02.2 PE=1 SV=1 - [Q8H8S1_ORYSJ]	21.57	5	structural molecule activity	cytoplasm; cytosol; membrane; mitochondrion; nucleus; organelle lumen; ribosome	metabolic process	Pf00827	0.902044	8.63196	0.816349	14.4459	0.815305	9.38128	0.95936	13.8212	0.95559	10.2659	0.873315	12.1395	24.3183	11.5317
Q6Z481	Os07g0503300 protein OS=Oryza sativa subsp. japonica GN=P0430F03.25 PE=2 SV=1 - [Q6Z481_ORYSJ]	4.03	1	catalytic activity		metabolic process	Pf00201	1.231		1.25612		1.38749		1.1479		1.14293		1.07868		52.9277	5.36377
Q85V22	Histidine amino acid transporter OS=Oryza sativa subsp. indica GN=ht PE=4 SV=1 - [Q85V22_ORYSI]	4.31	2		cytoplasm; membrane	response to stimulus; transport	Pf01490; Pf03222	0.976181	5.62283	1.03351	9.98565	1.0554	9.62708	1.01916	8.32555	1.06586	7.42217	1.02177	7.19199	49.3838	9.21729
Q6K1Q6	Putative hydroxyproline-rich glycoprotein 1 OS=Oryza sativa subsp. japonica GN=OSJNOa283G08.1 PE=1 SV=1 - [Q6K1Q6_ORYSJ]	36.57	6	structural molecule activity	cytoplasm; cytosol; endoplasmic reticulum; membrane; nucleus; organelle lumen; ribosome; vacuole	metabolic process	Pf01929	0.941851	7.8765	0.92933	12.812	0.943962	15.3402	1.03971	4.92332	1.05821	6.93465	1.00776	6.78606	15.3776	10.2866
Q10HT7	60S ribosomal protein L13 OS=Oryza sativa subsp. japonica GN=LOC_Os03g37970 PE=3 SV=1 - [Q10HT7_ORYSJ]	24.49	1	structural molecule activity	cytoplasm; cytosol; membrane; nucleus; organelle lumen; ribosome	metabolic process	Pf01294	1.15904		1.26922		1.17735		0.990963		0.911358		1.0584		22.5274	10.8872
B8B0Q4	Putative uncharacterized protein OS=Oryza sativa subsp. indica GN=OsI_23887 PE=3 SV=1 - [B8B0Q4_ORYSI]	4.75	5	catalytic activity; nucleotide binding	cytoplasm; membrane	metabolic process; regulation of biological process; response to stimulus	Pf00133; Pf01406; Pf08264; Pf09334	1.14259	14.4513	1.3161	22.408	1.27344	6.91483	1.00817	7.2815	0.964597	4.22187	0.960562	9.35518	130.907	6.27783
Q0DW35	Os02g0834000 protein OS=Oryza sativa subsp. japonica GN=Os02g0834000 PE=2 SV=1 - [Q0DW35_ORYSJ]	10.77	1	nucleotide binding; protein binding	cytoplasm; cytoskeleton; membrane; nucleus; organelle lumen	cell communication; cell differentiation; cell growth; cell organization and biogenesis; development; regulation of biological process; reproduction; response to stimulus; transport	Pf00071; Pf08477	1.13214	15.5585	1.18975	17.7331	1.10215	10.6584	1.0984	9.42426	0.991099	15.6262	1.03512	7.82245	21.3923	9.21729
Q0DTS9	Os03g0227400 protein (Fragment) OS=Oryza sativa subsp. japonica GN=Os03g0227400 PE=3 SV=1 - [Q0DTS9_ORYSJ]	5.96	1	catalytic activity		metabolic process	Pf00332	1.11527	3.72538	1.25856	23.6892	1.18568	15.6332	0.835715	0.509084	0.779492	21.0211	0.844716	4.20422	25.0513	4.75439
Q0ITI9	Os11g0249900 protein (Fragment) OS=Oryza sativa subsp. japonica GN=Os11g0249900 PE=4 SV=1 - [Q0ITI9_ORYSJ]	16.57	6	catalytic activity; nucleotide binding	membrane	defense response; metabolic process; regulation of biological process; response to stimulus	Pf00069; Pf07714	0.958326	8.41192	0.889372	13.9019	0.887226	11.1947	0.912309	5.88736	0.997246	8.5333	0.947017	10.3679	55.0584	8.06006
Q0DJC0	Os05g0302700 protein OS=Oryza sativa subsp. japonica GN=Os05g0302700 PE=2 SV=1 - [Q0DJC0_ORYSJ]	11.05	1	transporter activity	cytoplasm; membrane; mitochondrion	transport	Pf00153	0.95254		0.838244		0.788044		1.05836		1.19701		1.01947		40.951	9.74463
Q40648	Probable voltage-gated potassium channel subunit beta OS=Oryza sativa subsp. japonica GN=KOB1 PE=1 SV=2 - [KCAB_ORYSJ]	14.33	5	transporter activity	membrane	regulation of biological process; transport	Pf00248	1.04411	5.59773	1.06569	10.8077	1.02121	5.74825	0.914014	7.40779	0.922532	5.40137	0.926045	5.507	36.4266	7.40088
A2WNI6	Coatomer subunit beta OS=Oryza sativa subsp. indica GN=OsI_01415 PE=3 SV=1 - [A2WNI6_ORYSI]	13.26	3	structural molecule activity	cytoplasm; Golgi; membrane	transport	Pf01602; Pf07718	1.0693	13.7243	1.04363	23.2098	1.02052	19.1536	0.999508	3.66539	0.842949	14.7375	0.853308	9.07205	105.11	5.65576
A2WM87	Serine/threonine-protein kinase OS=Oryza sativa subsp. indica GN=OsI_00958 PE=3 SV=1 - [A2WM87_ORYSI]	3.32	1	catalytic activity; nucleotide binding		cell communication; metabolic process; reproduction	Pf00069; Pf01453; Pf07714; Pf08276	1.01267		0.873964		1.40209		1.1512		1.02267		1.14522		88.4652	6.32861
Q688W0	Os05g0567800 protein OS=Oryza sativa subsp. japonica GN=OJ1781_H11.17 PE=2 SV=1 - [Q688W0_ORYSJ]	6.99	2	transporter activity	cytoplasm; membrane; vacuole	transport	Pf00083; Pf07690	0.880206	2.40578	0.860726	11.0185	0.81022	64.0524	1.05164	5.45124	1.09095	7.33826	1.07495	0.988128	53.7652	8.51416
Q69W20	Os07g0535800 protein OS=Oryza sativa subsp. japonica GN=OJ1058_A12.113 PE=2 SV=1 - [Q69W20_ORYSJ]	10.05	3	catalytic activity; nucleotide binding	cytoplasm	metabolic process	Pf00069; Pf01657; Pf07714	0.984845	8.82461	1.06055	14.555	1.08958	15.6366	0.876995	7.28956	0.938117	6.07319	0.901094	17.5084	66.1772	7.57666
Q75M01	Os05g0157200 protein OS=Oryza sativa subsp. japonica GN=P0676G05.12 PE=2 SV=1 - [Q75M01_ORYSJ]	39.52	4		membrane	response to stimulus	Pf00582	1.02978	8.10638	1.00901	7.1718	0.998751	6.53068	0.956963	9.58519	0.962896	8.84952	0.961412	13.0591	17.9924	5.37646
Q9FTZ6	Os01g0117900 protein OS=Oryza sativa subsp. japonica GN=P0698G03.41 PE=2 SV=1 - [Q9FTZ6_ORYSJ]	10.16	3		cytoplasm; membrane		Pf00892	0.931527	7.01726	1.08393	6.02512	0.998665	14.8242	1.01107	14.6415	1.04872	7.67986	1.11887	3.21883	40.5899	8.49951
Q7XTU1	OSJNBa0058K23.11 protein OS=Oryza sativa subsp. japonica GN=OSJNBa0058K23.11 PE=2 SV=2 - [Q7XTU1_ORYSJ]	16.67	4	catalytic activity; nucleotide binding		metabolic process	Pf00069; Pf07714	0.890222	8.68201	0.890042	5.64804	0.914186	6.07902	1.03212	4.83465	1.03894	5.79115	1.03081	4.3836	41.6333	7.73779
Q10CU9	Glycosyl hydrolase family 3 N terminal domain containing protein, expressed OS=Oryza sativa subsp. japonica GN=OSJNBa0069E14.7 PE=2 SV=1 - [Q10CU9_ORYSJ]	5.12	1	catalytic activity	cytoplasm	metabolic process	Pf00933; Pf01915	1.01236	4.66312	1.24995	1.57708	1.12132	7.69422	1.14249	3.78603	0.965852	1.27472	1.04352	7.77392	67.7346	7.54736
Q7XIK7	Putative guanine nucleotide-exchange protein GEP2 OS=Oryza sativa subsp. japonica GN=OJ1773_H01.101 PE=4 SV=1 - [Q7XIK7_ORYSJ]	5.89	1	enzyme regulator activity		cell communication; regulation of biological process; response to stimulus	Pf01369; Pf09324; Pf12783	0.987493	6.96979	1.08913	7.06885	0.92786	5.32427	1.2408	3.87792	1.30038	8.14933	0.947027	3.93905	139.681	5.90967
B8BK38	Putative uncharacterized protein OS=Oryza sativa subsp. indica GN=OsI_35831 PE=3 SV=1 - [B8BK38_ORYSI]	9.09	4	catalytic activity; metal ion binding	cytoplasm; membrane	metabolic process	Pf00067	0.935872	14.8665	0.874009	17.7611	0.871789	13.8355	1.00253	9.5176	1.00848	6.86406	0.980307	5.07353	55.4055	8.49951
Q7XQF8	OSJNBa0081L15.5 protein OS=Oryza sativa subsp. japonica GN=OSJNBa0081L15.5 PE=2 SV=2 - [Q7XQF8_ORYSJ]	13.21	3	catalytic activity; nucleotide binding		metabolic process	Pf00106	0.968977	13.3747	1.13971	21.8431	1.00434	12.2846	1.16012	12.418	1.08851	10.1567	1.13934	7.64301	34.6864	9.90576
B9FAY8	Putative uncharacterized protein OS=Oryza sativa subsp. japonica GN=OsJ_09326 PE=4 SV=1 - [B9FAY8_ORYSJ]	7.72	5	metal ion binding; RNA binding	cytoplasm; extracellular; membrane; mitochondrion; vacuole	metabolic process; response to stimulus	Pf00330; Pf00694	0.898995	18.1104	0.853434	33.0115	0.873484	23.2842	1.10036	4.45559	1.03409	18.4957	1.0929	9.57325	98.7641	6.16357
B9FFP1	60S ribosomal protein L6 OS=Oryza sativa subsp. japonica GN=OsJ_15159 PE=3 SV=1 - [B9FFP1_ORYSJ]	32.43	5	structural molecule activity	cytoplasm; cytosol; endoplasmic reticulum; membrane; nucleus; organelle lumen; ribosome	metabolic process	Pf01159; Pf03868	0.905707	4.66574	0.788352	10.9314	0.824776	9.29646	1.00766	13.2929	1.06119	8.57291	0.963808	7.26522	24.6744	10.0229
A2Z2U1	Putative uncharacterized protein OS=Oryza sativa subsp. indica GN=OsI_31936 PE=4 SV=1 - [A2Z2U1_ORYSI]	18.5	6	catalytic activity; metal ion binding; nucleotide binding	cytoplasm; membrane; vacuole	metabolic process	Pf00107; Pf08240	1.0724	6.95433	1.09908	21.4947	1.04561	13.1491	0.911258	15.2423	0.880905	12.3441	0.908954	16.653	35.9207	8.47021
B1NEV4	Putative ribosomal protein S14 OS=Oryza sativa subsp. japonica PE=2 SV=1 - [B1NEV4_ORYSJ]	15.89	1	structural molecule activity	cytoplasm; ribosome	metabolic process	Pf00411	0.883629		0.871766		1.03906		0.957242		1.04501		0.993623		16.2116	10.4478
Q10BA8	Putative uncharacterized protein OJ1111_B11.20 OS=Oryza sativa subsp. japonica GN=OJ1111_B11.20 PE=2 SV=1 - [Q10BA8_ORYSJ]	5.94	2	catalytic activity; nucleotide binding; protein binding	membrane	metabolic process	Pf00069; Pf06098; Pf07714	0.726573	11.3925	0.680358	12.9352	0.656467	25.5266	1.12354	3.67049	1.23068	7.08172	1.13735	8.5265	54.1581	6.66846
Q6ZGX8	Os02g0690700 protein OS=Oryza sativa subsp. japonica GN=OJ1743_B12.40 PE=2 SV=1 - [Q6ZGX8_ORYSJ]	9.36	4	protein binding	cytoplasm; membrane	transport	Pf00928	1.00038	10.1923	1.02912	8.24972	1.32884	12.1093	1.0709	6.46046	0.999116	4.57773	1.14549	13.8673	49.2386	9.24658
B9FCH2	Putative uncharacterized protein OS=Oryza sativa subsp. japonica GN=OsJ_16146 PE=4 SV=1 - [B9FCH2_ORYSJ]	7.84	14		membrane		Pf09726	0.992692	8.60342	1.02812	29.7313	0.963773	21.3241	1.03664	8.40306	0.985286	10.5905	1.0261	10.1702	209.306	4.71631
B8AAV9	Putative uncharacterized protein OS=Oryza sativa subsp. indica GN=OsI_04088 PE=3 SV=1 - [B8AAV9_ORYSI]	8.91	1	catalytic activity	cytoplasm; extracellular; membrane; mitochondrion; nucleus	metabolic process; response to stimulus	Pf00162	0.978529		0.889601		0.989579		0.991823		1.0457		1.00559		46.6528	7.72314
Q67IX6	Protein disulfide isomerase-like 1-4 OS=Oryza sativa subsp. japonica GN=PDIL1-4 PE=2 SV=1 - [PDI14_ORYSJ]	7.64	4	catalytic activity	cytoplasm; endoplasmic reticulum; membrane; mitochondrion; organelle lumen	cellular homeostasis; metabolic process; regulation of biological process; response to stimulus	Pf00085	0.951626	13.6144	0.904615	12.636	0.907779	17.273	1.01227	11.2642	1.0232	7.09103	0.978368	12.6072	62.2144	4.93213
P55142	Glutaredoxin-C6 OS=Oryza sativa subsp. japonica GN=GRXC6 PE=1 SV=2 - [GRXC6_ORYSJ]	49.11	4	catalytic activity	cytoplasm	cellular homeostasis; metabolic process; regulation of biological process; transport	Pf00462	0.919707	9.12893	0.896203	5.34208	0.866497	8.65304	0.931884	4.62845	0.953708	7.59421	0.910494	8.6185	11.7671	6.03662
A3C906	Putative uncharacterized protein OS=Oryza sativa subsp. japonica GN=OsJ_33105 PE=4 SV=1 - [A3C906_ORYSJ]	4.09	1		membrane		Pf01490	0.710511	84.9963	1.13631	124.341	1.05971	140.107	1.18806	7.86724	1.34229	7.02035	1.4632	10.794	51.6368	10.272
Q5JK28	Os01g0931100 protein OS=Oryza sativa subsp. japonica GN=OSJNBa0052O12.39 PE=2 SV=1 - [Q5JK28_ORYSJ]	13.52	6		membrane			1.01765	11.1111	0.962488	13.7672	1.06341	12.3422	0.978696	13.485	0.911783	6.38107	0.993769	13.0129	54.8905	9.05615
B9FEY9	Putative uncharacterized protein OS=Oryza sativa subsp. japonica GN=OsJ_14640 PE=4 SV=1 - [B9FEY9_ORYSJ]	14.55	7	catalytic activity; nucleotide binding	cytoplasm; membrane	metabolic process	Pf00587; Pf03129	1.02545	15.1159	0.990785	19.3366	1.02285	30.1539	0.92577	13.6831	0.948297	13.3784	0.903377	15.3311	66.1325	5.80811
B9F7T1	Putative uncharacterized protein OS=Oryza sativa subsp. japonica GN=OsJ_10464 PE=1 SV=1 - [B9F7T1_ORYSJ]	10.19	5	catalytic activity; metal ion binding		metabolic process	Pf00205; Pf02775; Pf02776	0.943362	13.3306	0.936367	20.2137	0.939907	26.8197	0.926532	9.93561	0.895689	12.5336	0.878924	14.384	61.3728	6.01123
B9G094	Putative uncharacterized protein OS=Oryza sativa subsp. japonica GN=OsJ_26856 PE=4 SV=1 - [B9G094_ORYSJ]	8.03	9		cytoplasm; cytosol; membrane	cell differentiation; cell growth; cell organization and biogenesis; development; metabolic process; reproduction; transport	Pf04048	1.005	12.9964	1.00444	16.1636	0.973312	26.2181	1.03011	3.78986	0.996905	3.1692	1.01352	11.0393	116.266	5.74463
Q94HF1	Eukaryotic translation initiation factor 3 subunit K OS=Oryza sativa subsp. japonica GN=TIF3K1 PE=2 SV=1 - [EIF3K_ORYSJ]	26.11	6	RNA binding	cytoplasm; nucleus	metabolic process; regulation of biological process	Pf03399; Pf10075	0.972839	16.7887	1.00127	19.4466	0.985757	29.8731	1.03176	9.53301	0.995186	10.3536	0.97264	14.9387	25.8154	5.16064
B8A6J9	Putative uncharacterized protein OS=Oryza sativa subsp. indica GN=OsI_00791 PE=4 SV=1 - [B8A6J9_ORYSI]	5.85	1	catalytic activity; nucleotide binding	membrane	metabolic process	Pf00069; Pf07714	0.820614		0.869497		0.910766		0.981953		1.03285		1.04867		70.8491	9.27588
Q0IV73	Os11g0107700 protein (Fragment) OS=Oryza sativa subsp. japonica GN=Os11g0107700 PE=4 SV=1 - [Q0IV73_ORYSJ]	14.35	2	catalytic activity; nucleotide binding; protein binding	membrane	metabolic process	Pf00069; Pf07714	0.960026	7.8674	1.01975	4.5028	1.33175	35.4267	1.06485	8.31266	1.04822	6.8982	1.08606	3.23694	73.1469	7.53271
B8B6Z1	Putative uncharacterized protein OS=Oryza sativa subsp. indica GN=OsI_26338 PE=3 SV=1 - [B8B6Z1_ORYSI]	7.45	2	catalytic activity; nucleotide binding	cytoplasm; membrane	metabolic process	Pf00069; Pf01657; Pf07714	0.919429	5.92714	0.788619	10.8405	0.859496	12.3241	1.03855	0.453324	1.07417	1.32171	1.02	2.09114	73.9646	6.23975
Q6ASR1	Chaperonin protein OS=Oryza sativa subsp. japonica GN=OSJNBa0077J22.11 PE=2 SV=1 - [Q6ASR1_ORYSJ]	9.91	4	nucleotide binding; protein binding	cytoplasm; membrane	metabolic process; response to stimulus	Pf00118	0.998023	7.41482	0.870357	5.06688	0.886633	6.09411	0.91935	8.82482	0.968109	5.20053	0.911514	5.60029	59.1959	6.68311
Q8GV28	Os02g0174200 protein OS=Oryza sativa subsp. japonica GN=DPK3 PE=2 SV=1 - [Q8GV28_ORYSJ]	15.44	3	catalytic activity; nucleotide binding	membrane	metabolic process	Pf00069; Pf07714	1.01261	8.27822	1.17841	27.7587	1.03863	23.1414	0.973919	9.91963	0.925159	17.2739	0.961346	14.8407	46.7444	6.90283
Q8W0C5	Os01g0722800 protein OS=Oryza sativa subsp. japonica GN=P0690B02.35 PE=3 SV=1 - [Q8W0C5_ORYSJ]	22.62	1	catalytic activity; enzyme regulator activity		metabolic process; regulation of biological process	Pf03737	0.983865		1.02325		1.07764		0.974143		0.953669		0.979951		18.0533	5.5542
A6N081	Regulator of ribonuclease activity a (Fragment) OS=Oryza sativa subsp. indica PE=2 SV=1 - [A6N081_ORYSI]	22.75	1	enzyme regulator activity		metabolic process; regulation of biological process	Pf03737	1.08396		1.04025		1.05588		0.842704		0.805768		0.850058		17.9392	5.88428
A2YBG8	Putative uncharacterized protein OS=Oryza sativa subsp. indica GN=OsI_22453 PE=4 SV=1 - [A2YBG8_ORYSI]	12.35	3	DNA binding; protein binding	nucleus	metabolic process; response to stimulus	Pf00240; Pf00627; Pf09280	1.12345	8.10829	1.09504	6.16992	1.12093	2.09891	0.938207	8.44992	0.988734	11.3462	0.956183	15.9153	43.0799	4.76709
Q656J2	Os06g0503400 protein OS=Oryza sativa subsp. japonica GN=P0564B04.17 PE=2 SV=1 - [Q656J2_ORYSJ]	26.79	7		cytoplasm; endoplasmic reticulum; membrane		Pf02453	0.997057	10.454	1.03379	12.6744	1.06426	23.9663	0.959795	18.1853	0.961407	8.87362	1.03107	13.0783	28.5723	7.00537
Q10FT0	Os03g0657100 protein OS=Oryza sativa subsp. japonica GN=Os03g0657100 PE=4 SV=1 - [Q10FT0_ORYSJ]	10.32	7	catalytic activity; protein binding	membrane	development; metabolic process; regulation of biological process	Pf04564; Pf11789	0.955263	7.33537	0.960836	15.9531	0.895549	9.99668	1.04838	11.7663	1.02127	13.7336	1.01931	14.8144	88.428	5.73193
Q10RN9	Os03g0151900 protein OS=Oryza sativa subsp. japonica GN=Os03g0151900 PE=2 SV=1 - [Q10RN9_ORYSJ]	20.1	1	catalytic activity; nucleotide binding	cytoplasm; endosome; membrane; nucleus	cell communication; regulation of biological process; response to stimulus; transport	Pf00009; Pf00025; Pf00071; Pf04670; Pf08477	0.964424		0.85023		0.775757		0.984666		1.12147		1.00081		21.635	6.34131
B8A738	Putative uncharacterized protein OS=Oryza sativa subsp. indica GN=OsI_01645 PE=3 SV=1 - [B8A738_ORYSI]	11.82	3	catalytic activity; nucleotide binding	cytoplasm; membrane	metabolic process	Pf00069; Pf07714	0.898965	8.57949	0.898298	8.02385	0.943213	8.80264	1.02691	4.19891	1.04696	4.25458	0.995256	1.90392	57.0883	8.5874
A2YP92	Putative uncharacterized protein OS=Oryza sativa subsp. indica GN=OsI_27085 PE=4 SV=1 - [A2YP92_ORYSI]	23.21	3		membrane		Pf05078	1.01549	7.66814	0.98981	16.9144	0.937546	10.1774	1.01235	5.89684	1.0413	14.059	0.989775	9.6256	23.1459	7.79639
Q6Z3C2	Os07g0462200 protein OS=Oryza sativa subsp. japonica GN=P0038F09.45 PE=2 SV=1 - [Q6Z3C2_ORYSJ]	22.7	3		cytoplasm		Pf06749	0.828337	25.9109	0.950325	34.7951	1.05581	37.6484	1.10528	8.19375	1.24675	6.97676	1.11394	7.26805	19.5409	8.1626
B8AZD7	Putative uncharacterized protein OS=Oryza sativa subsp. indica GN=OsI_18958 PE=4 SV=1 - [B8AZD7_ORYSI]	11.53	3		membrane		Pf10255	0.9468	10.5277	0.907496	12.8308	1.01526	22.2958	1.01144	1.27429	0.899591	2.08261	0.99067	15.8799	61.2755	6.56592
Q84ZK1	Os07g0597000 protein OS=Oryza sativa subsp. japonica GN=P0453E05.118 PE=2 SV=1 - [Q84ZK1_ORYSJ]	23.13	2	RNA binding	nucleus	cell death; cell organization and biogenesis; defense response; metabolic process; regulation of biological process; response to stimulus	Pf01287	0.967098	1.72055	0.923025	2.82132	0.914275	8.69039	0.996406	6.9232	1.00777	12.5878	0.94565	12.5705	17.4467	6.20166
B7E741	cDNA clone:001-043-A08, full insert sequence OS=Oryza sativa subsp. japonica PE=2 SV=1 - [B7E741_ORYSJ]	10.83	3		membrane		Pf03661	1.0452	14.5215	0.895231	14.1703	1.01707	13.0404	0.947841	9.12189	0.998997	20.9441	0.962002	12.6809	39.4881	9.5835
B8AMN4	Putative uncharacterized protein OS=Oryza sativa subsp. indica GN=OsI_12679 PE=4 SV=1 - [B8AMN4_ORYSI]	10.13	7		cytoplasm; membrane		Pf04129; Pf09763	0.910265	7.742	0.853013	11.4739	0.860751	16.4777	0.978227	7.1981	1.00911	7.30621	0.94185	7.20713	94.3608	5.2749
Q2QU06	60 kDa chaperonin alpha subunit OS=Oryza sativa subsp. japonica GN=LOC_Os12g17910 PE=2 SV=1 - [Q2QU06_ORYSJ]	18.17	9	nucleotide binding; protein binding	cytoplasm; cytosol; extracellular; membrane; mitochondrion; ribosome	cell organization and biogenesis; development; metabolic process	Pf00118	0.869816	13.8469	0.801874	8.96558	0.785224	8.44958	1.12578	16.4551	1.08691	5.37541	1.09607	16.1072	61.0926	5.21143
B9F1X8	Putative uncharacterized protein OS=Oryza sativa subsp. japonica GN=OsJ_08019 PE=4 SV=1 - [B9F1X8_ORYSJ]	6.15	3		membrane	transport	Pf03169	0.915934	12.0782	0.847486	3.86256	0.971638	14.0242	0.93538	1.99309	1.02474	3.77525	0.99535	10.6915	83.2239	8.07471
Q942N7	Os01g0166100 protein OS=Oryza sativa subsp. japonica GN=P0701D05.20 PE=4 SV=1 - [Q942N7_ORYSJ]	15.41	5	catalytic activity		metabolic process	Pf00565	0.979086	7.35578	0.882337	9.10767	0.927128	5.58011	0.938687	5.16275	0.966829	9.38194	0.940843	1.18224	36.993	9.45166
Q5Z4C9	Os06g0306600 protein OS=Oryza sativa subsp. japonica GN=B1386G10.30 PE=2 SV=1 - [Q5Z4C9_ORYSJ]	12.22	3	catalytic activity	cytoplasm; mitochondrion	cell differentiation; cell growth; cell organization and biogenesis; development; metabolic process; reproduction	Pf00135; Pf07859; Pf12697	0.896789	17.2071	0.948011	8.30261	0.946322	29.1087	1.03517	11.1416	1.11217	11.4487	1.02164	15.9167	39.1628	6.88818
B8B0P7	Putative uncharacterized protein OS=Oryza sativa subsp. indica GN=OsI_23874 PE=4 SV=1 - [B8B0P7_ORYSI]	10.73	2	catalytic activity	cytoplasm; endoplasmic reticulum; membrane		Pf09430	1.22394	7.53028	1.49231	9.25525	1.27549	16.7753	1.13954	1.90615	0.893447	14.0495	1.04677	2.747	22.4396	9.1001
Q852M1	Probable aldehyde oxidase 2 OS=Oryza sativa subsp. japonica GN=Os03g0790900 PE=2 SV=1 - [ALDO2_ORYSJ]	7.38	10	catalytic activity; metal ion binding		metabolic process	Pf00941; Pf01315; Pf01799; Pf02738; Pf03450	1.03977	8.47525	1.06596	9.60788	1.08405	11.9972	0.908658	10.4639	0.909	13.7545	0.901379	17.8219	144.972	6.23975
Q84KJ7	Ammonium transporter 2 member 1 OS=Oryza sativa subsp. japonica GN=AMT2-1 PE=2 SV=1 - [AMT21_ORYSJ]	8.23	3	transporter activity	membrane	transport	Pf00909	1.26688	14.7645	1.35697	27.2567	1.23178	23.2354	1.11867	25.2251	0.846312	8.54291	0.956783	18.1953	51.3778	8.48486
A2YLE3	Putative uncharacterized protein OS=Oryza sativa subsp. indica GN=OsI_26038 PE=3 SV=1 - [A2YLE3_ORYSI]	13.86	6	catalytic activity		metabolic process	Pf00201	1.10542	6.43076	1.15706	2.45908	1.22086	24.0683	0.867958	14.7564	0.913163	19.2314	0.911435	7.24087	52.8907	6.17627
P35687	40S ribosomal protein S21 OS=Oryza sativa subsp. japonica GN=RPS21 PE=3 SV=1 - [RS21_ORYSJ]	13.41	1	structural molecule activity	cytoplasm; cytosol; ribosome	metabolic process	Pf01249	0.935684	3.63848	0.941506	12.4793	0.902308	9.88558	0.969282	9.71133	1.00417	9.95483	0.968939	10.416	9.24763	7.34229
Q67VW4	Os06g0489500 protein OS=Oryza sativa subsp. japonica GN=P0583E12.28 PE=4 SV=1 - [Q67VW4_ORYSJ]	4.03	6	catalytic activity; metal ion binding		metabolic process	Pf00383	0.917609	12.412	0.910976	42.7959	0.961931	29.2184	0.953451	16.7555	0.997133	3.40743	1.06546	12.9527	179.686	6.90283
Q7XRT0	OSJNBa0042F21.13 protein OS=Oryza sativa subsp. japonica GN=OSJNBa0042F21.13 PE=3 SV=2 - [Q7XRT0_ORYSJ]	14.8	6	catalytic activity; metal ion binding	cytoplasm; extracellular	defense response; metabolic process; response to stimulus	Pf00316	0.916884	3.95009	0.857031	9.98741	0.821595	6.84143	1.00829	4.46587	1.04713	7.6363	0.990501	10.3265	42.2181	5.84619
B9FNT1	Putative uncharacterized protein OS=Oryza sativa subsp. japonica GN=OsJ_18003 PE=4 SV=1 - [B9FNT1_ORYSJ]	12.85	1	protein binding	cytoplasm; membrane	transport	Pf00928; Pf01875	0.946354		0.925926		1.00095		1.02889		1.02671		1.13056		86.0455	6.32861
A2XAQ0	Putative uncharacterized protein OS=Oryza sativa subsp. indica GN=OsI_09330 PE=3 SV=1 - [A2XAQ0_ORYSI]	7.89	2	catalytic activity; nucleotide binding	cytoplasm; membrane; proteasome	cell communication; cellular homeostasis; development; metabolic process; regulation of biological process; response to stimulus	Pf00004; Pf01078; Pf05496; Pf07724; Pf07726; Pf07728	0.994646	0.0605921	0.833117	7.493	0.797422	2.66987	0.986031	7.72022	0.988905	1.49503	0.966454	0.0344076	46.8162	5.07178
B8BH02	Putative uncharacterized protein OS=Oryza sativa subsp. indica GN=OsI_33714 PE=3 SV=1 - [B8BH02_ORYSI]	16.84	3	catalytic activity; nucleotide binding	membrane	metabolic process	Pf00069; Pf07714	0.910376	4.34889	1.02558	13.2862	1.10781	16.4489	0.979203	10.215	1.04593	5.62796	1.13887	1.95549	41.301	7.89893
B8AJF0	Putative uncharacterized protein OS=Oryza sativa subsp. indica GN=OsI_07634 PE=4 SV=1 - [B8AJF0_ORYSI]	16.52	3		cytoplasm; cytosol; nucleus	response to stimulus	Pf00415	0.972557	2.54195	1.08208	11.0163	0.999964	8.36638	0.947031	4.92041	1.00027	3.69498	1.03121	1.25199	47.7274	5.63037
A2XZS8	Putative uncharacterized protein OS=Oryza sativa subsp. indica GN=OsI_18241 PE=3 SV=1 - [A2XZS8_ORYSI]	3.03	1	catalytic activity; metal ion binding; nucleotide binding; transporter activity	cytoplasm; endoplasmic reticulum; membrane	cellular homeostasis; metabolic process; response to stimulus; transport	Pf00122; Pf00689; Pf00690; Pf00702; Pf08282; Pf12710	0.985067		0.909992		0.915913		0.989048		1.04325		1.03036		114.383	5.80811
Q653V5	Os06g0676600 protein OS=Oryza sativa subsp. japonica GN=B1153E06.9 PE=2 SV=1 - [Q653V5_ORYSJ]	12.04	2	catalytic activity; nucleotide binding		metabolic process	Pf00069; Pf07714	0.88395	4.22636	0.889297	14.9225	0.886796	8.29227	1.0796	6.6358	1.04658	13.6402	1.13193	12.2414	42.5288	8.19189
Q7Y1F9	Putative NPH3 domain containing protein OS=Oryza sativa subsp. japonica GN=OSJNBa0057G07.13 PE=4 SV=1 - [Q7Y1F9_ORYSJ]	13.13	7	signal transducer activity	membrane	cell communication; regulation of biological process; response to stimulus	Pf03000	1.04085	17.7291	1.1112	32.508	1.16426	28.2291	1.11751	16.9513	1.03401	14.4189	1.06545	14.0638	69.0693	6.12549
Q6YUA1	Os02g0100300 protein OS=Oryza sativa subsp. japonica GN=B1370C05.2 PE=4 SV=1 - [Q6YUA1_ORYSJ]	8.33	3	protein binding		response to stimulus		1.0609	10.5715	0.94625	10.1248	0.984326	10.0066	0.980744	3.40877	1.0699	5.06422	1.00928	9.5176	44.1233	5.12256
Q5ZDH9	Os01g0139200 protein OS=Oryza sativa subsp. japonica GN=P0480E02.3 PE=4 SV=1 - [Q5ZDH9_ORYSJ]	11.77	7	protein binding			Pf00564	1.06013	5.72836	1.1529	9.55131	1.20775	15.776	0.968674	10.097	0.91599	9.18684	1.00904	8.79965	70.3255	5.93506
Q6K3D4	Os02g0281000 protein OS=Oryza sativa subsp. japonica GN=OSJNBa0063E14.1-1 PE=3 SV=1 - [Q6K3D4_ORYSJ]	7.92	7	catalytic activity; enzyme regulator activity; metal ion binding; nucleotide binding	membrane	metabolic process; regulation of biological process	Pf00027; Pf00069; Pf00481; Pf07714	1.12297	8.55451	1.12648	10.4522	1.22112	18.4687	0.991737	9.89514	1.05615	8.89132	1.03275	11.8256	120.848	5.2749
B8ADR9	Putative uncharacterized protein OS=Oryza sativa subsp. indica GN=OsI_06236 PE=4 SV=1 - [B8ADR9_ORYSI]	12.82	5	catalytic activity	membrane	metabolic process	Pf01557; Pf09298	1.0319	3.26004	1.10334	12.4912	1.10861	18.0845	0.93156	3.51577	0.892844	4.42969	0.903324	6.01985	47.0886	5.93506
B9FLX5	Putative uncharacterized protein OS=Oryza sativa subsp. japonica GN=OsJ_19771 PE=4 SV=1 - [B9FLX5_ORYSJ]	6.65	6		membrane			0.974873	13.4569	0.950181	19.1338	0.923623	5.31833	1.00298	15.4134	1.00642	3.9106	0.945948	12.3119	117.981	8.96826
Q9ST80	CAA303717.1 protein OS=Oryza sativa GN=q3037.17 PE=3 SV=1 - [Q9ST80_ORYSA]	25.73	7	antioxidant activity; catalytic activity; metal ion binding	cytoplasm; membrane; vacuole	metabolic process; response to stimulus	Pf00141	0.924184	8.57374	0.891086	19.4638	0.928421	18.8979	1.06031	9.20047	1.02459	9.9968	1.07728	8.43556	36.7488	6.53662
A2Y9Q8	Putative uncharacterized protein OS=Oryza sativa subsp. indica GN=OsI_21809 PE=4 SV=1 - [A2Y9Q8_ORYSI]	16.92	3	catalytic activity		metabolic process; response to stimulus	Pf01596; Pf12847	1.00522	13.1282	0.944031	12.5362	0.973884	9.74725	0.927556	16.1766	0.909763	4.67812	0.872537	8.9313	28.8566	5.38916
B9FB24	Putative uncharacterized protein OS=Oryza sativa subsp. japonica GN=OsJ_09415 PE=3 SV=1 - [B9FB24_ORYSJ]	18.47	6	catalytic activity; nucleotide binding		metabolic process	Pf00069; Pf07714	0.995038	2.50752	0.976785	14.1863	1.00999	6.15858	0.924691	4.13133	1.03696	11.8101	0.92248	10.2722	44.7095	8.22119
Q6Z4F3	Os07g0187700 protein OS=Oryza sativa subsp. japonica GN=OSJNBb0084L07.11 PE=2 SV=1 - [Q6Z4F3_ORYSJ]	8.79	3	protein binding	cytoplasm; endoplasmic reticulum; membrane	cell communication; response to stimulus; transport		1.01382	7.85897	0.919476	23.7154	1.06238	30.3121	0.970267	5.32434	0.989087	10.3971	1.00094	5.95048	42.9206	6.62451
Q9LGA3	Os01g0128400 protein OS=Oryza sativa subsp. japonica GN=P0408F06.4 PE=4 SV=1 - [Q9LGA3_ORYSJ]	14.51	8		cytoplasm; endoplasmic reticulum; membrane; nucleus		Pf10151	1.0116	11.6045	1.08295	28.6298	1.09412	31.6172	1.00777	12.7	0.978356	8.02348	1.00397	9.25423	63.277	8.74854
Q6YYV8	Os08g0562500 protein OS=Oryza sativa subsp. japonica GN=P0604E01.52 PE=2 SV=1 - [Q6YYV8_ORYSJ]	8.76	3	catalytic activity			Pf02458	0.965194	25.8945	1.19581	32.1888	1.05552	38.3734	1.27765	3.66182	1.10954	12.1946	1.20511	6.54604	47.5851	6.60986
Q5NB88	Os01g0236000 protein OS=Oryza sativa subsp. japonica GN=P0708G02.18 PE=4 SV=1 - [Q5NB88_ORYSJ]	16.83	2					1.09323	1.07832	1.01673	2.83294	1.05645	13.7058	1.13452	0.309965	1.10973	11.8155	0.997595	4.04362	21.8636	8.86572
B9G0A2	Putative uncharacterized protein OS=Oryza sativa subsp. japonica GN=OsJ_26867 PE=4 SV=1 - [B9G0A2_ORYSJ]	14.11	5	protein binding	cytoplasm; membrane; mitochondrion		Pf00400	0.969745	3.51569	0.982932	12.8791	1.06362	10.8883	1.0305	7.8663	1.04826	3.56752	1.04554	12.0537	43.0567	5.43994
Q6ZLM6	Os07g0246300 protein OS=Oryza sativa subsp. japonica GN=OJ1058_C08.35 PE=2 SV=1 - [Q6ZLM6_ORYSJ]	19.68	5	protein binding	nucleus; organelle lumen		Pf00400	0.98221	2.23561	1.06879	13.3371	1.00684	14.9056	0.96842	10.5812	0.943128	6.56304	0.9722	3.2527	33.7359	7.04932
Q0DJC4	Os05g0301600 protein OS=Oryza sativa subsp. japonica GN=Os05g0301600 PE=2 SV=1 - [Q0DJC4_ORYSJ]	8.48	1	enzyme regulator activity		cell communication; metabolic process; regulation of biological process; response to stimulus	Pf04979	1.24559	1.03053	1.30351	26.6611	1.37978	23.192	0.890013	10.0467	1.01321	18.448	1.05608	27.232	18.3027	4.83057
A2XLH5	Putative uncharacterized protein OS=Oryza sativa subsp. indica GN=OsI_13324 PE=4 SV=1 - [A2XLH5_ORYSI]	16.15	8				Pf06101	0.906003	8.51566	0.844622	10.6661	0.842605	13.9317	1.00498	5.49913	1.03148	7.93333	0.960444	6.67576	62.4099	7.04932
A2Z916	Putative uncharacterized protein OS=Oryza sativa subsp. indica GN=OsI_34207 PE=4 SV=1 - [A2Z916_ORYSI]	11	4	catalytic activity		cellular homeostasis; regulation of biological process	Pf00085; Pf00462	1.06846	4.90026	0.987278	6.97938	1.01507	8.65428	0.939577	8.10873	1.00911	4.44846	0.982818	2.23026	53.0791	5.24951
Q84Q77	17.9 kDa class I heat shock protein OS=Oryza sativa subsp. japonica GN=HSP17.9A PE=2 SV=1 - [HS17A_ORYSJ]	8.07	1		nucleus	response to stimulus	Pf00011	1.00135	6.27623	0.973735	37.6839	1.17329	48.2871	1.03205	0.198727	1.00514	6.7214	1.27572	15.6904	17.8991	6.06201
Q7GCH3	26S proteasome regulatory particle triple-A ATPase subunit6 OS=Oryza sativa subsp. japonica GN=OsRPT6 PE=2 SV=1 - [Q7GCH3_ORYSJ]	11.32	4	catalytic activity; nucleotide binding	cytoplasm; proteasome	metabolic process; reproduction; response to stimulus	Pf00004; Pf01057; Pf01078; Pf05496; Pf06068; Pf06414; Pf07724; Pf07726; Pf07728	0.999959	4.03028	0.97145	6.63439	0.896494	3.8816	0.934427	4.03148	0.981183	4.95955	0.978975	7.75169	47.1928	8.85107
Q7EY59	Os07g0452500 protein OS=Oryza sativa subsp. japonica GN=OSJNBb0062P14.116-1 PE=2 SV=1 - [Q7EY59_ORYSJ]	13.41	2		membrane		Pf04061	1.02346	8.71644	0.992095	23.1774	1.13226	9.1928	1.00674	7.37441	1.06627	4.45936	1.09725	11.7606	18.8699	9.20264
A3B973	Putative uncharacterized protein OS=Oryza sativa subsp. japonica GN=OsJ_20424 PE=3 SV=1 - [A3B973_ORYSJ]	22.54	9	catalytic activity; nucleotide binding; protein binding	cytoplasm; membrane; proteasome	metabolic process; regulation of biological process; response to stimulus	Pf00004; Pf00158; Pf05496; Pf06068; Pf06414; Pf07724; Pf07726; Pf07728	0.981778	7.52052	1.03087	16.2505	1.03637	11.6844	1.00004	8.89121	0.972997	5.11959	0.982697	8.83654	46.654	7.78174
Q8W3C9	Serine/threonine-protein kinase OS=Oryza sativa subsp. japonica GN=OSJNBa0046L02.6 PE=4 SV=1 - [Q8W3C9_ORYSJ]	13.53	9	catalytic activity; nucleotide binding; protein binding		cell communication; metabolic process; reproduction	Pf00069; Pf01453; Pf07714	0.955862	8.8095	0.886279	9.96396	0.925256	8.72408	0.980535	11.3732	1.00373	6.69805	0.99233	8.67131	89.6116	6.7417
Q6Z901	Kinesin light chain-like protein OS=Oryza sativa subsp. japonica GN=P0501G04.4 PE=2 SV=1 - [Q6Z901_ORYSJ]	13.69	7	protein binding	cytoplasm; membrane			1.02523	11.7742	0.966159	17.4481	1.04306	11.7673	1.02935	16.09	1.08469	11.7896	1.04808	16.2697	64.904	5.46533
Q7XIZ0	Putative proton myo-inositol transporter OS=Oryza sativa subsp. japonica GN=OJ1048_C10.5 PE=3 SV=1 - [Q7XIZ0_ORYSJ]	9.06	5	transporter activity	membrane	transport	Pf00083; Pf07690	0.933741	6.44565	0.926086	12.635	0.911737	18.6282	0.933925	8.00578	0.952286	5.75201	0.959396	10.0568	63.0334	8.11865
Q7X7K8	NADPH--cytochrome P450 reductase OS=Oryza sativa subsp. japonica GN=OSJNBb0022F16.2 PE=3 SV=2 - [Q7X7K8_ORYSJ]	5.04	3	catalytic activity; metal ion binding; nucleotide binding	cytoplasm; endoplasmic reticulum; membrane	metabolic process	Pf00175; Pf00258; Pf00667	1.02256	10.5648	1.07824	26.2529	0.961155	11.7338	1.03582	3.4686	0.953637	3.68366	0.945297	8.91799	76.1244	5.26221
A2ZJB7	Putative uncharacterized protein OS=Oryza sativa subsp. indica GN=OsI_37917 PE=4 SV=1 - [A2ZJB7_ORYSI]	12.66	9		cytoplasm; membrane	transport	Pf07393	0.945731	8.75661	0.915346	15.0769	0.93328	20.5719	1.06195	4.03679	1.01942	8.28412	1.03002	8.72329	76.1507	5.31299
Q5ZBH8	Os01g0618100 protein OS=Oryza sativa subsp. japonica GN=B1040D09.1 PE=4 SV=1 - [Q5ZBH8_ORYSJ]	9.3	3				Pf00248	1.03362	2.03395	1.04145	8.25641	0.996775	7.83602	0.824605	11.8961	0.85536	4.15577	0.736957	16.2282	37.8916	6.72705
Q6Z8F4	Phosphoribulokinase OS=Oryza sativa subsp. japonica GN=P0459B01.11 PE=2 SV=1 - [Q6Z8F4_ORYSJ]	7.69	3	catalytic activity; nucleotide binding	cytoplasm; extracellular; membrane	defense response; metabolic process; response to stimulus	Pf00485	1.00364	7.3798	0.950598	17.3557	1.09637	10.1223	1.01923	4.62906	1.08834	8.3998	1.07035	11.043	44.8367	6.02393
A3BKR4	Putative uncharacterized protein OS=Oryza sativa subsp. japonica GN=OsJ_24599 PE=3 SV=1 - [A3BKR4_ORYSJ]	8.49	4	catalytic activity; nucleotide binding	cytoplasm	metabolic process	Pf00069; Pf01657; Pf07714	0.943236	6.13306	1.00874	13.9611	1.12762	31.2642	1.12802	10.5272	1.15486	19.5234	1.09597	4.15408	68.0249	6.40479
Q9LSU3	Proteasome subunit alpha type-6 OS=Oryza sativa subsp. japonica GN=PAA1 PE=2 SV=1 - [PSA6_ORYSJ]	21.95	5	catalytic activity	cytoplasm; cytosol; membrane; nucleus; proteasome; ribosome	metabolic process; response to stimulus	Pf00227; Pf10584	1.05093	9.47028	1.15578	10.0622	1.05619	13.0042	1.00672	6.67624	0.984558	10.2621	0.929845	4.32872	27.5561	6.65381
Q6Z6K0	Os02g0219700 protein OS=Oryza sativa subsp. japonica GN=P0027A02.29 PE=2 SV=1 - [Q6Z6K0_ORYSJ]	18.52	5		cytoplasm; membrane	development		0.822781	12.1841	0.76975	5.10191	0.779022	14.8473	1.03855	12.0164	1.05595	12.3797	1.0472	7.27574	29.2969	8.51416
A2WX99	DL119 protein OS=Oryza sativa subsp. indica GN=dl119 PE=4 SV=1 - [A2WX99_ORYSI]	13.45	3	protein binding			Pf03168	0.975286	9.34447	1.00735	26.6693	1.02203	21.8453	0.975672	15.9441	1.00704	9.03855	1.02028	7.05404	25.9593	9.86182
Q5WAB3	Os06g0167100 protein OS=Oryza sativa subsp. japonica GN=P0680A03.21 PE=2 SV=1 - [Q5WAB3_ORYSJ]	7.47	5	transporter activity	cytoplasm; Golgi; membrane	transport	Pf01602; Pf02883	0.998735	5.63675	0.950704	25.4128	0.98787	25.1796	0.948544	8.75503	1.08813	3.8475	1.0076	13.4618	95.0511	6.15088
Q0JL44	Protein SGT1 homolog OS=Oryza sativa subsp. japonica GN=SGT1 PE=1 SV=1 - [SGT1_ORYSJ]	16.35	6	protein binding	cytoplasm; nucleus	defense response; response to stimulus	Pf00515; Pf04969; Pf05002; Pf07719; Pf08959	0.956637	8.06155	0.940657	12.0701	0.951298	16.5899	0.980914	4.97708	0.980423	7.1118	0.932671	3.89243	40.9125	5.05908
Q688X1	Os05g0566500 protein OS=Oryza sativa subsp. japonica GN=OJ1781_H11.6 PE=2 SV=1 - [Q688X1_ORYSJ]	7.86	4	RNA binding		metabolic process	Pf05091	1.08219	6.43654	1.52716	35.4125	1.33714	24.9032	1.07255	12.5964	1.01284	8.54152	1.08111	16.0671	65.0404	5.47803
Q10KU7	Novel plant SNARE 11, putative, expressed OS=Oryza sativa subsp. japonica GN=LOC_Os03g25390 PE=4 SV=1 - [Q10KU7_ORYSJ]	11.35	1	catalytic activity		metabolic process		1.03769	7.77232	0.940947	2.21837	0.903098	13.7215	0.843885	9.04244	0.941626	11.1698	0.898692	3.03585	21.1726	5.77002
B9EZB1	Putative uncharacterized protein OS=Oryza sativa subsp. japonica GN=OsJ_00223 PE=4 SV=1 - [B9EZB1_ORYSJ]	4.64	1	catalytic activity; nucleotide binding	cytoplasm; membrane; mitochondrion	metabolic process	Pf00069; Pf07714	0.988945	0.35365	0.836892	6.45548	0.860835	2.42286	0.940573	3.70591	0.952104	8.58848	0.951535	5.26695	49.804	7.21045
A2XA86	Putative uncharacterized protein OS=Oryza sativa subsp. indica GN=OsI_09161 PE=4 SV=1 - [A2XA86_ORYSI]	7.65	3	catalytic activity	cytoplasm	metabolic process	Pf00082; Pf02225	0.888493	3.52686	0.828435	14.718	0.861918	11.4055	1.01446	7.06847	0.97082	3.09906	0.9723	5.72346	55.8366	6.85889
P09229	Cysteine proteinase inhibitor 1 OS=Oryza sativa subsp. japonica GN=Os01g0803200 PE=1 SV=2 - [CYT1_ORYSJ]	22.14	3	enzyme regulator activity	cytoplasm; extracellular	defense response; metabolic process; regulation of biological process; response to stimulus	Pf00031	0.970439	5.77371	0.935947	5.217	0.92731	8.50947	1.00542	7.92256	1.06022	7.69483	0.95235	5.28001	15.3459	5.84619
Q10KX6	Os03g0367000 protein OS=Oryza sativa subsp. japonica GN=Os03g0367000 PE=2 SV=1 - [Q10KX6_ORYSJ]	10.76	5	catalytic activity; protein binding	cytoplasm; endoplasmic reticulum; membrane	cell differentiation; cell growth; cell organization and biogenesis; development; metabolic process; response to stimulus	Pf00254; Pf00515; Pf07719	0.983165	7.54466	1.28883	19.5776	1.18323	18.2092	1.07709	5.87213	0.988345	16.9659	1.06744	15.1836	70.3736	5.5415
A2ZCQ7	60S ribosomal protein L10-1 OS=Oryza sativa subsp. indica GN=SC34 PE=2 SV=2 - [RL101_ORYSI]	33.04	3	structural molecule activity	cytoplasm; cytosol; membrane; nucleus; organelle lumen; ribosome; vacuole	metabolic process; response to stimulus	Pf00252	0.932541	12.9959	0.964526	18.6316	0.988263	10.1393	1.13454	16.2518	1.04277	12.4938	1.12563	11.0305	25.3303	10.2427
Q851K9	Os03g0694900 protein OS=Oryza sativa subsp. japonica GN=OSJNBb0021O11.3 PE=3 SV=1 - [Q851K9_ORYSJ]	10.34	8	catalytic activity; nucleotide binding	cytoplasm; mitochondrion	development; metabolic process; regulation of biological process; reproduction	Pf00133; Pf08264; Pf09334	0.979761	13.35	1.04264	16.2753	0.992864	18.7631	0.957763	15.4781	0.918555	7.52594	0.956222	15.4373	119.588	6.75635
Q6ERW9	Probable cinnamyl alcohol dehydrogenase 8B OS=Oryza sativa subsp. japonica GN=CAD8B PE=3 SV=2 - [CAD8B_ORYSJ]	13.53	5	catalytic activity; metal ion binding; nucleotide binding	extracellular	cell death; defense response; metabolic process; response to stimulus	Pf00107; Pf08240	1.00912	9.20311	0.977843	9.29737	1.0254	8.79635	0.91454	7.64924	0.972525	14.6521	0.92252	11.825	45.5459	7.89893
B8AER9	Putative uncharacterized protein OS=Oryza sativa subsp. indica GN=OsI_07907 PE=4 SV=1 - [B8AER9_ORYSI]	20.18	5		membrane	transport	Pf03357	0.899401	5.67191	0.821206	9.42039	0.83417	7.59546	1.00764	11.1142	1.02538	9.68217	0.956317	10.7773	25.4363	4.70361
Q7G602	Flavonoid 3'-hydroxylase OS=Oryza sativa subsp. japonica GN=OSJNAa0053D03.2 PE=2 SV=1 - [Q7G602_ORYSJ]	8.56	4	catalytic activity; metal ion binding		metabolic process; response to stimulus	Pf00067	1.23787	6.56816	1.37698	33.4726	1.27309	12.0971	0.799231	61.2675	0.830923	20.0341	0.850471	30.3555	57.4809	8.04541
B8B005	Putative uncharacterized protein OS=Oryza sativa subsp. indica GN=OsI_20653 PE=3 SV=1 - [B8B005_ORYSI]	10.9	8	catalytic activity; nucleotide binding; RNA binding	cytoplasm; membrane; vacuole	metabolic process; reproduction; response to stimulus	Pf00004; Pf00910; Pf01057; Pf01078; Pf02359; Pf02933; Pf05496; Pf05729; Pf06068; Pf07724; Pf07728; Pf09848	0.973642	9.0041	0.96534	9.95769	0.964353	8.97775	1.00005	8.03735	1.00153	8.85154	1.01991	6.79426	81.0489	5.97314
B8AH21	Putative uncharacterized protein OS=Oryza sativa subsp. indica GN=OsI_05724 PE=4 SV=1 - [B8AH21_ORYSI]	1.83	4					1.12431	9.36596	1.13501	17.6504	1.04313	17.3277	0.998668	3.64808	1.02223	2.46387	1.22524	7.63112	331.927	4.09424
B8AHM8	Putative uncharacterized protein OS=Oryza sativa subsp. indica GN=OsI_08713 PE=3 SV=1 - [B8AHM8_ORYSI]	12.57	2	metal ion binding; transporter activity	cytoplasm; membrane; mitochondrion; nucleus; organelle lumen; vacuole	transport	Pf00153	0.899153	1.69127	0.813187	2	0.880397	4.99866	1.04771	6.20189	1.08079	5.8433	1.03773	3.33576	41.4931	9.77393
Q6H7J6	Probable metal-nicotianamine transporter YSL14 OS=Oryza sativa subsp. japonica GN=YSL14 PE=2 SV=1 - [YSL14_ORYSJ]	8.25	3		membrane	transport	Pf03169	0.957813	17.855	1.01799	10.8991	1.09763	9.83371	0.962142	6.92301	0.957905	9.85434	1.04739	10.7562	78.4424	8.07471
B8AT03	Putative uncharacterized protein OS=Oryza sativa subsp. indica GN=OsI_15574 PE=3 SV=1 - [B8AT03_ORYSI]	28.57	4	structural molecule activity	cytoplasm; cytosol; membrane; nucleus; organelle lumen; ribosome	metabolic process	Pf00831	0.922884	5.36577	0.870421	9.45876	0.829488	8.77287	0.996819	5.72243	0.97971	7.44617	0.913077	7.44992	13.4499	11.2681
Q10NB4	Clathrin assembly protein, putative, expressed OS=Oryza sativa subsp. japonica GN=Os03g0275500 PE=2 SV=1 - [Q10NB4_ORYSJ]	9.98	6	protein binding	cytoplasm; cytosol; membrane; nucleus	cell organization and biogenesis; transport	Pf07651	1.14079	18.0567	1.50417	51.4473	1.09989	37.0867	1.11573	18.6046	1.00226	28.3767	1.0367	14.8389	71.9943	5.64307
Q8H5M0	Os07g0585000 protein OS=Oryza sativa subsp. japonica GN=OJ1060_D03.112 PE=2 SV=1 - [Q8H5M0_ORYSJ]	5.62	2	protein binding			Pf00168	1.11274	5.7187	1.04164	13.7985	1.16397	17.3262	0.938989	4.30505	0.940625	3.60833	1.10315	22.5666	46.0245	4.66553
A6N0M9	Nucleoside diphosphate kinase 1 OS=Oryza sativa subsp. indica GN=NDKR PE=1 SV=1 - [NDK1_ORYSI]	22.82	3	catalytic activity; metal ion binding; nucleotide binding	cytoplasm; extracellular; membrane; vacuole	metabolic process; response to stimulus	Pf00334	1.16897	8.0502	1.09425	6.19784	1.1223	10.4787	0.824108	14.1632	0.793984	9.60632	0.806055	13.6532	16.8346	6.80029
Q2QS12	Bifunctional aminoacyl-tRNA synthetase, putative, expressed OS=Oryza sativa subsp. japonica GN=LOC_Os12g25710 PE=3 SV=1 - [Q2QS12_ORYSJ]	11.86	5	catalytic activity; nucleotide binding	cytoplasm	metabolic process	Pf00587; Pf03129; Pf09180	1.00802	5.46678	0.934303	7.48093	0.934496	15.904	0.926786	4.69735	0.951756	7.83419	0.905581	1.81244	55.6639	6.59521
A2ZLU3	Putative uncharacterized protein OS=Oryza sativa subsp. indica GN=OsI_38787 PE=4 SV=1 - [A2ZLU3_ORYSI]	11.59	2		cytoplasm		Pf00314	0.8973	1.50231	0.961761	10.8471	1.08659	11.2259	0.939602	7.20928	0.907859	2.22702	0.984117	19.8398	23.8268	6.29053
A6MZE1	60S ribosomal protein L36 (Fragment) OS=Oryza sativa subsp. indica PE=2 SV=1 - [A6MZE1_ORYSI]	16.22	1	structural molecule activity	cytoplasm; cytosol; membrane; ribosome	metabolic process	Pf01158; Pf12794	0.87124	2.46301	0.732453	10.29	0.746609	5.48799	1.04977	0.777741	1.07905	4.03028	0.953731	2.17804	12.5252	11.4292
A2Z7A7	Putative uncharacterized protein OS=Oryza sativa subsp. indica GN=OsI_33583 PE=3 SV=1 - [A2Z7A7_ORYSI]	9.03	2	catalytic activity		metabolic process	Pf00704	1.04244	10.9486	1.17589	6.60078	1.19526	12.3741	0.991045	11.2651	0.93689	10.8219	1.1163	7.16449	31.0943	4.67822
Q2QYH1	Harpin-induced protein 1 containing protein, expressed OS=Oryza sativa subsp. japonica GN=LOC_Os12g02700 PE=2 SV=1 - [Q2QYH1_ORYSJ]	9.01	2		cytoplasm		Pf03168	1.12117	11.8273	1.1942	18.796	1.20705	5.30158	0.992501	8.99642	0.952857	21.4728	0.836599	19.4144	24.879	9.26123
A3ACK1	Putative uncharacterized protein OS=Oryza sativa subsp. japonica GN=OsJ_08829 PE=4 SV=1 - [A3ACK1_ORYSJ]	5.26	1	catalytic activity		metabolic process	Pf00483	1.37251	48.2811	1.60781	129.532	3.84881	734.602	1.37219	88.5155	1.00068	27.8204	1.47239	134.38	33.8645	9.84717
Q10MW8	Os03g0292800 protein OS=Oryza sativa subsp. japonica GN=Os03g0292800 PE=2 SV=1 - [Q10MW8_ORYSJ]	13.88	1			transport	Pf00638	0.966569	11.679	0.9534	2.31431	0.942252	3.67192	0.897404	10.0341	0.915584	4.13076	0.844689	9.44624	23.4145	4.79248
Q5Z7P1	Os06g0727400 protein OS=Oryza sativa subsp. japonica GN=P0017G10.19 PE=2 SV=1 - [Q5Z7P1_ORYSJ]	6.76	2	catalytic activity; nucleotide binding	membrane	metabolic process	Pf00069; Pf07714	0.938799	1.02966	0.891827	1.99868	0.839474	4.09927	0.881418	12.9507	0.975198	2.57705	0.885023	4.66503	45.3903	9.40771
B8AEK1	Putative uncharacterized protein OS=Oryza sativa subsp. indica GN=OsI_06468 PE=4 SV=1 - [B8AEK1_ORYSI]	5.22	3	catalytic activity; nucleotide binding; protein binding	cytoplasm; membrane	metabolic process	Pf00069; Pf07714; Pf11721; Pf12819	1.08063	18.4024	1.22328	32.6504	1.04167	19.3844	1.12508	20.3623	1.03303	3.39149	1.09077	6.11512	115.073	6.75635
Q0J9V5	Thioredoxin-like protein CXXS1 OS=Oryza sativa subsp. japonica GN=Os04g0629500 PE=2 SV=1 - [CXXS1_ORYSJ]	29.32	3	catalytic activity		cellular homeostasis; metabolic process; regulation of biological process	Pf00085	1.00585	4.27293	0.936723	11.0029	0.930984	2.83733	0.895692	12.544	0.964474	11.029	0.960356	13.8929	14.6624	4.88135
B8AXD5	Putative uncharacterized protein OS=Oryza sativa subsp. indica GN=OsI_18263 PE=4 SV=1 - [B8AXD5_ORYSI]	7.38	3	protein binding				0.86167	7.14701	0.807522	9.53569	0.779293	4.88317	1.01932	8.0584	1.09741	0.498574	0.986355	1.23916	52.0013	10.1694
Q5SMQ9	Auxin efflux carrier component 1 OS=Oryza sativa subsp. japonica GN=PIN1 PE=2 SV=1 - [PIN1_ORYSJ]	11.26	7	transporter activity	cytoplasm; membrane; vacuole	cell communication; development; regulation of biological process; response to stimulus; transport	Pf03547	0.915286	5.18319	0.911164	18.64	0.880653	9.87811	1.05869	11.6503	1.05291	9.66938	1.05648	12.9945	64.6759	8.82178
Q7XR06	Probable protein phosphatase 2C 45 OS=Oryza sativa subsp. japonica GN=Os04g0659500 PE=2 SV=2 - [P2C45_ORYSJ]	21.99	4	catalytic activity; metal ion binding	membrane	defense response; metabolic process; response to stimulus	Pf00481	1.03642	8.48437	1.0442	19.4646	1.0576	20.9079	1.02306	11.4644	1.03521	5.10595	1.05223	5.24193	30.5651	5.14795
A2WNV9	Putative uncharacterized protein OS=Oryza sativa subsp. indica GN=OsI_01543 PE=4 SV=1 - [A2WNV9_ORYSI]	6.04	7	catalytic activity	cytoplasm; endoplasmic reticulum; membrane			1.07699	7.90986	1.14165	22.1286	1.08643	14.3258	1.0586	11.9125	1.02162	8.21785	1.00367	11.0946	130.484	5.80811
F6M2M6	Heterotrimeric G protein beta subunit (Fragment) OS=Oryza sativa subsp. japonica PE=2 SV=1 - [F6M2M6_ORYSJ]	25.93	9	protein binding	membrane		Pf00400	0.9375	5.46013	1.03113	22.0929	0.962912	9.78571	0.988914	9.27377	1.03837	7.8558	1.00295	9.57795	41.5134	7.41553
Q10L35	Expressed protein OS=Oryza sativa subsp. japonica GN=Os03g0360500 PE=2 SV=1 - [Q10L35_ORYSJ]	13.48	2		membrane		Pf06417	1.03164	20.6497	0.935337	61.695	0.947339	40.2234	0.936934	19.1766	0.934322	18.0676	1.01371	28.1492	19.2868	9.0415
Q7XRE7	OSJNBa0006M15.20 protein OS=Oryza sativa subsp. japonica GN=OSJNBa0006M15.20 PE=2 SV=2 - [Q7XRE7_ORYSJ]	20.21	2	protein binding	cytoplasm; membrane; vacuole		Pf01477	0.762173	4.58603	0.701579	4.3399	0.692616	7.11076	1.12392	7.90468	1.11978	0.827584	1.11755	9.92972	20.5239	4.97021
A3A4X5	Putative uncharacterized protein OS=Oryza sativa subsp. japonica GN=OsJ_06022 PE=3 SV=1 - [A3A4X5_ORYSJ]	10.28	2	antioxidant activity; catalytic activity; metal ion binding	cytoplasm; mitochondrion	metabolic process; response to stimulus	Pf00141	1.15988	2.72963	1.32692	6.32973	1.20051	3.3303	1.1659	6.48384	0.974639	1.23851	1.02389	2.15117	29.0526	6.96143
Q6YVF0	Os02g0223700 protein OS=Oryza sativa subsp. japonica GN=P0758B01.33 PE=2 SV=1 - [Q6YVF0_ORYSJ]	20.26	4				Pf12023	1.16112	8.63013	1.17248	29.3754	1.1487	23.2001	0.778983	6.49722	0.759988	15.7401	0.739357	17.4511	23.4537	10.0669
B8B2J2	Putative uncharacterized protein OS=Oryza sativa subsp. indica GN=OsI_24491 PE=4 SV=1 - [B8B2J2_ORYSI]	13.11	6				Pf07762	1.06588	4.86938	1.13065	17.1004	1.19689	17.5718	0.919045	7.29593	0.926062	6.4552	0.94162	12.6366	53.6428	6.37939
Q01MG4	OSIGBa0131F24.5 protein OS=Oryza sativa GN=OSIGBa0131F24.5 PE=4 SV=1 - [Q01MG4_ORYSA]	16.1	1		cytoplasm			1.07178		2.50551		1.22877		0.781463		0.556162		0.854975		13.1248	8.88037
Q5Z402	Clathrin light chain 2 OS=Oryza sativa subsp. japonica GN=Os06g0731800 PE=2 SV=1 - [CLC2_ORYSJ]	19.93	5	structural molecule activity	cytoplasm; Golgi; membrane	transport	Pf01086	0.990439	9.64095	1.03901	12.1822	1.01962	18.5224	1.09308	13.308	1.09736	7.54387	1.05978	8.56004	31.271	7.59131
A2X7F5	Phenylalanine ammonia-lyase OS=Oryza sativa subsp. indica GN=OsI_08145 PE=3 SV=1 - [A2X7F5_ORYSI]	8.27	1	catalytic activity	cytoplasm	metabolic process	Pf00221	1.31969		1.33654		1.31444		0.786547		0.781574		0.769232		76.5421	6.25244
REVERSED_00114862	REVERSED_00114862	0.37	1				Protein not found	0.889962	7.90623	0.805724	14.7333	0.861252	11.9032	0.992681	7.41045	1.08266	14.2205	0.962395	5.9483	249.253	6.7417
A2XN87	Putative uncharacterized protein OS=Oryza sativa subsp. indica GN=OsI_14018 PE=4 SV=1 - [A2XN87_ORYSI]	10.43	3	catalytic activity; nucleotide binding	cytoplasm; cytosol	metabolic process; regulation of biological process; response to stimulus	Pf00106; Pf01073; Pf01370; Pf08659	1.0521	2.64868	1.02909	4.60224	0.98674	0.555124	0.832383	15.4569	0.883325	8.94777	0.875179	9.89496	29.3702	6.354
Q337T4	Os10g0441800 protein OS=Oryza sativa subsp. japonica GN=Os10g0441800 PE=2 SV=1 - [Q337T4_ORYSJ]	14	1	nucleotide binding	cytoplasm; endosome; membrane; nucleus	cell communication; regulation of biological process; response to stimulus; transport	Pf00025; Pf00071; Pf04670; Pf08477	1.09481	7.89731	1.45915	33.3768	1.3431	81.9411	0.943588	1.12847	0.904843	15.5654	1.08752	19.9191	27.0838	7.45947
B8BCN9	Putative uncharacterized protein OS=Oryza sativa subsp. indica GN=OsI_31719 PE=4 SV=1 - [B8BCN9_ORYSI]	11.6	8		membrane		Pf12070	0.98418	11.1543	0.907446	11.2106	0.952512	10.8429	1.05834	5.95467	1.06745	9.45711	1.05366	13.2048	66.6192	8.01611
Q7XKE9	Clathrin light chain 1 OS=Oryza sativa subsp. japonica GN=Os04g0679100 PE=2 SV=1 - [CLC1_ORYSJ]	10.63	4	structural molecule activity	cytoplasm; Golgi; membrane	transport		0.921455	4.40182	0.909888	23.2393	0.80941	17.3678	1.00836	4.8577	1.01357	5.99255	0.979661	8.82761	32.5162	5.03369
Q01JZ7	H0525E10.11 protein OS=Oryza sativa GN=H0525E10.11 PE=4 SV=1 - [Q01JZ7_ORYSA]	10.45	10		cytoplasm; cytosol; membrane	cell differentiation; cell growth; cell organization and biogenesis; development; reproduction		0.985298	15.3998	0.892195	12.3961	0.951354	13.7407	0.994175	11.7507	1.02852	10.4441	0.972527	16.8208	122.555	6.07471
A2XYK8	Putative uncharacterized protein OS=Oryza sativa subsp. indica GN=OsI_17784 PE=4 SV=1 - [A2XYK8_ORYSI]	7.42	2	protein binding		development; reproduction	Pf01398	1.01954	10.4661	0.925242	7.5679	0.884086	4.65509	1.04086	5.01938	1.13908	7.08361	1.0673	5.50024	34.8785	6.72705
A2ZHB1	Putative uncharacterized protein OS=Oryza sativa subsp. indica GN=OsI_37179 PE=4 SV=1 - [A2ZHB1_ORYSI]	11.46	1	catalytic activity; nucleotide binding; protein binding	cytoplasm; membrane	metabolic process	Pf00069; Pf07714; Pf08263	1.00168		1.06997		1.25342		0.573128		0.734403		1.28969		82.7409	7.23975
Q2QQX3	Expressed protein OS=Oryza sativa subsp. japonica GN=LOC_Os12g29550 PE=4 SV=1 - [Q2QQX3_ORYSJ]	11.37	6		membrane		Pf12576	1.0027	9.72396	0.944759	18.0179	0.945526	19.2605	0.980513	13.2985	1.01029	8.85494	0.982637	11.3278	59.286	5.93506
H2KX75	Alpha-L-arabinofuranosidase C-terminus family protein, expressed OS=Oryza sativa subsp. japonica GN=LOC_Os12g03470 PE=4 SV=1 - [H2KX75_ORYSJ]	8.37	1					0.952246	10.198	1.08995	8.39844	1.06653	13.0761	1.07004	4.04623	0.963274	1.85461	1.05721	2.29852	55.8866	5.8208
Q0DJV6	Probable calcium-binding protein CML18 OS=Oryza sativa subsp. japonica GN=CML18 PE=2 SV=1 - [CML18_ORYSJ]	21.52	3	metal ion binding	membrane	cell communication; defense response; development; metabolic process; regulation of biological process; reproduction; response to stimulus	Pf00036	0.968221	4.34944	0.944585	15.87	1.00564	9.66062	1.03641	10.8455	0.985153	3.50259	1.03049	9.29034	17.1121	5.08447
Q2QU07	Armadillo/beta-catenin repeat family protein, putative, expressed OS=Oryza sativa subsp. japonica GN=LOC_Os12g17900 PE=4 SV=1 - [Q2QU07_ORYSJ]	17.49	12	catalytic activity; protein binding	membrane	development; metabolic process; regulation of biological process	Pf04564; Pf11789	0.973387	9.85946	0.986466	12.3857	0.929684	11.2429	1.01088	12.2084	1.02526	11.3801	0.985499	7.72149	87.8691	5.85889
B8AII1	Putative uncharacterized protein OS=Oryza sativa subsp. indica GN=OsI_06012 PE=3 SV=1 - [B8AII1_ORYSI]	6.42	2	catalytic activity	cytoplasm; extracellular	defense response; metabolic process; response to stimulus	Pf01379; Pf03900	0.97957	16.825	1.11028	35.5965	1.14972	30.951	1.00289	1.86493	1.06917	0.728934	1.10584	7.65731	38.3967	7.38623
Q2QQ48	Eukaryotic translation initiation factor 5A-2, putative, expressed OS=Oryza sativa subsp. japonica GN=LOC_Os12g32240 PE=2 SV=1 - [Q2QQ48_ORYSJ]	18.75	1	RNA binding	nucleus	cell death; cell organization and biogenesis; defense response; metabolic process; regulation of biological process; response to stimulus	Pf01287	0.935903	7.90147	0.907672	2.0595	0.922497	5.10804	1.0016	6.40143	1.0229	4.36777	0.946704	8.1297	17.5457	5.98584
Q6YVV7	Putative serine/threonine-specific protein kinase OS=Oryza sativa subsp. japonica GN=P0696F12.8 PE=4 SV=1 - [Q6YVV7_ORYSJ]	4.78	1	catalytic activity; nucleotide binding	cytoplasm	metabolic process	Pf00069; Pf01657; Pf07714	0.97175		0.919314		0.9082		0.968679		0.990416		0.953242		70.7735	6.48096
Q0J0H9	Os09g0508300 protein OS=Oryza sativa subsp. japonica GN=Os09g0508300 PE=2 SV=1 - [Q0J0H9_ORYSJ]	15.65	4	metal ion binding	membrane		Pf01529	0.981288	37.0479	1.48137	93.3941	1.6255	75.4206	0.925348	16.2009	0.876263	23.9996	0.966513	40.1928	49.4536	8.36768
B8ACV5	Putative uncharacterized protein OS=Oryza sativa subsp. indica GN=OsI_00092 PE=3 SV=1 - [B8ACV5_ORYSI]	5.3	1	catalytic activity; nucleotide binding	cytoplasm; membrane	metabolic process	Pf00069; Pf07714	0.873321		0.954141		0.801359		0.963512		1.02133		1.03726		72.7698	7.41553
A2YNC3	Putative uncharacterized protein OS=Oryza sativa subsp. indica GN=OsI_26734 PE=4 SV=1 - [A2YNC3_ORYSI]	10.96	4	catalytic activity; nucleotide binding	cytoplasm; membrane; mitochondrion; vacuole	metabolic process		0.944432	3.4178	0.93278	15.7417	0.920689	22.808	1.00332	8.10155	0.991732	6.315	1.02433	9.27247	48.3963	8.95361
Q10M57	14 kDa zinc-binding protein, putative, expressed OS=Oryza sativa subsp. japonica GN=Os03g0322500 PE=2 SV=1 - [Q10M57_ORYSJ]	27.91	3	catalytic activity	cytoplasm; membrane	metabolic process	Pf01230; Pf11969	1.07842	4.66597	1.06483	9.02107	1.04155	8.12738	0.919152	5.48019	0.964038	6.47363	0.897284	8.51503	14.1865	6.37939
Q84MQ4	60S ribosomal protein L27a-3, putative, expressed OS=Oryza sativa subsp. japonica GN=OSJNBa0030J19.9 PE=3 SV=1 - [Q84MQ4_ORYSJ]	47.95	6	structural molecule activity	cytoplasm; cytosol; membrane; nucleus; organelle lumen; ribosome	metabolic process	Pf00828	0.932164	5.7354	0.899923	12.4183	0.897848	9.11719	1.01689	11.697	1.02353	13.5405	0.982567	9.44478	16.0437	11.019
Q8H4X9	Os08g0326600 protein OS=Oryza sativa subsp. japonica GN=OJ1136_A10.112 PE=2 SV=1 - [Q8H4X9_ORYSJ]	4.23	2	catalytic activity; nucleotide binding	cytoplasm	metabolic process	Pf00117; Pf00733; Pf00958; Pf02540; Pf03054; Pf06508; Pf07722	1.29158	18.2458	1.30446	24.2992	1.33103	10.8763	1.08614	19.1276	0.991703	17.395	1.00005	8.89824	59.5487	6.53662
A2YNY6	Putative uncharacterized protein OS=Oryza sativa subsp. indica GN=OsI_26969 PE=3 SV=1 - [A2YNY6_ORYSI]	6.8	3	catalytic activity; nucleotide binding	cytoplasm	metabolic process	Pf00069; Pf01657; Pf07714	1.09176	2.6534	0.985312	3.69768	0.978246	1.40408	0.854685	16.5192	0.927573	12.2168	0.85866	21.5979	70.2766	6.354
Q2QND8	Os12g0569300 protein OS=Oryza sativa subsp. japonica GN=LOC_Os12g38150 PE=2 SV=1 - [Q2QND8_ORYSJ]	13.73	2		cytoplasm		Pf00314	0.947886	13.8399	0.994766	14.3849	1.01505	20.2763	0.994283	8.34272	0.987128	6.46628	1.06287	21.074	23.415	8.01611
A3BXT8	Putative uncharacterized protein OS=Oryza sativa subsp. japonica GN=OsJ_29002 PE=3 SV=1 - [A3BXT8_ORYSJ]	9.81	4	transporter activity	membrane	transport	Pf00344; Pf10559	0.992128	10.0533	1.03552	26.3248	1.00294	17.8647	1.01928	11.7381	1.0213	5.86134	1.01952	5.75125	41.537	9.11475
Q10AH9	Ankyrin repeat domain protein 2, putative, expressed OS=Oryza sativa subsp. japonica GN=LOC_Os03g63480 PE=4 SV=1 - [Q10AH9_ORYSJ]	9.74	3	protein binding			Pf00023; Pf12796	0.949188	6.72721	0.942569	31.2686	1.01961	27.1239	0.951489	7.52678	1.00074	4.73445	1.01366	7.4183	37.082	4.71631
Q0J8M9	Os08g0103400 protein OS=Oryza sativa subsp. japonica GN=Os08g0103400 PE=4 SV=1 - [Q0J8M9_ORYSJ]	6.6	2	metal ion binding	membrane			1.18131	8.40396	1.33597	12.4989	1.16264	5.94767	1.23788	8.56008	1.0627	9.99702	1.06799	15.2067	35.8621	8.20654
A3BCS7	Putative uncharacterized protein OS=Oryza sativa subsp. japonica GN=OsJ_21705 PE=3 SV=1 - [A3BCS7_ORYSJ]	11.78	6	nucleotide binding; protein binding	cytoplasm; membrane	metabolic process	Pf00118	0.987039	9.85743	0.921789	18.4037	0.914848	15.9198	0.992917	12.2696	1.01011	8.34649	0.933528	12.2726	59.1535	6.01123
H2KW82	Glycosyl hydrolases family 38 protein, expressed OS=Oryza sativa subsp. japonica GN=LOC_Os11g32260 PE=4 SV=1 - [H2KW82_ORYSJ]	4.03	4	catalytic activity; metal ion binding		metabolic process	Pf01074; Pf07748; Pf09261	0.935943	1.08143	0.940332	7.33155	0.929129	5.41543	1.00953	18.1308	1.04571	13.213	1.0347	7.73866	113.928	6.30322
B8BCN1	Putative uncharacterized protein OS=Oryza sativa subsp. indica GN=OsI_31699 PE=4 SV=1 - [B8BCN1_ORYSI]	8.31	2		membrane		Pf03151	1.5496	13.677	1.65827	42.6785	1.37296	22.6881	1.17265	11.3795	0.864807	24.0634	0.92153	37.8519	38.7839	9.05615
A2XGN6	Putative uncharacterized protein OS=Oryza sativa subsp. indica GN=OsI_11562 PE=4 SV=1 - [A2XGN6_ORYSI]	12.21	1	catalytic activity; nucleotide binding	membrane	metabolic process	Pf00069; Pf07387; Pf07714	0.878396		0.718768		0.821688		1.09897		1.3845		1.14491		61.8527	9.01221
Q0DMU8	Os03g0792800 protein (Fragment) OS=Oryza sativa subsp. japonica GN=Os03g0792800 PE=3 SV=1 - [Q0DMU8_ORYSJ]	15.04	3	catalytic activity	membrane	metabolic process	Pf00332; Pf07983	0.985001	1.58141	0.993797	9.59328	1.07072	1.164	0.955986	2.48463	0.991031	12.6879	1.0101	3.79683	43.4086	6.16357
Q6L4X5	Thioredoxin OS=Oryza sativa subsp. japonica GN=OSJNBb0108E17.4 PE=3 SV=1 - [Q6L4X5_ORYSJ]	9.09	1	catalytic activity	cytoplasm; membrane; mitochondrion; vacuole	cellular homeostasis; defense response; metabolic process; regulation of biological process; response to stimulus	Pf00085	0.918726	4.71542	0.76741	11.7588	0.780413	5.77371	0.879273	3.61306	0.895785	6.28807	0.836062	9.31313	13.1687	5.08447
B8ARA0	Putative uncharacterized protein OS=Oryza sativa subsp. indica GN=OsI_16505 PE=4 SV=1 - [B8ARA0_ORYSI]	10.38	8	DNA binding; protein binding; RNA binding	cytoplasm; membrane; nucleus	metabolic process	Pf02847; Pf02854	0.980255	12.5616	0.991043	14.2047	0.964707	12.0576	0.939484	10.4526	0.935615	10.3064	0.956472	11.5183	83.2992	8.45557
B9FC58	Putative uncharacterized protein OS=Oryza sativa subsp. japonica GN=OsJ_15923 PE=4 SV=1 - [B9FC58_ORYSJ]	12.34	2	catalytic activity; metal ion binding; nucleotide binding	membrane	metabolic process	Pf00036; Pf00069; Pf06293; Pf07714	1.01816	8.79284	1.15319	11.8748	0.979279	10.8339	1.02329	8.71876	0.994198	10.9067	1.01166	8.71762	60.9676	5.80811
A2Z024	Putative uncharacterized protein OS=Oryza sativa subsp. indica GN=OsI_30953 PE=3 SV=1 - [A2Z024_ORYSI]	16.59	5	catalytic activity; nucleotide binding		metabolic process	Pf00069; Pf01636; Pf07387; Pf07714	0.987373	16.8762	0.988156	9.25938	0.991518	18.3646	0.988691	7.95486	1.00102	14.5239	0.938135	7.10385	46.6377	7.51807
A2XTJ4	Putative uncharacterized protein OS=Oryza sativa subsp. indica GN=OsI_15929 PE=3 SV=1 - [A2XTJ4_ORYSI]	9.51	2	catalytic activity; nucleotide binding	membrane	metabolic process	Pf00069; Pf07714	0.881369	13.4982	0.9828	16.1835	1.04661	22.8624	0.915664	6.07579	0.985387	3.80661	1.0382	5.87054	57.1627	8.86572
Q9LST6	Proteasome subunit beta type-2 OS=Oryza sativa subsp. japonica GN=PBD1 PE=2 SV=2 - [PSB2_ORYSJ]	36.79	7	catalytic activity	cytoplasm; extracellular; membrane; nucleus; proteasome; vacuole	metabolic process; response to stimulus	Pf00227	0.988667	8.81631	0.970343	8.41204	0.980465	11.8102	0.960223	11.224	0.966482	7.36334	0.952699	6.36666	23.4629	5.64307
B8AUC2	Putative uncharacterized protein OS=Oryza sativa subsp. indica GN=OsI_16037 PE=4 SV=1 - [B8AUC2_ORYSI]	8.96	3	catalytic activity; nucleotide binding	cytoplasm; membrane; mitochondrion	metabolic process	Pf00724	1.10695	8.51265	1.09942	3.03175	1.14176	7.85884	0.850008	0.888191	0.930217	1.58744	0.904879	6.60072	36.9148	8.85107
A2Y2C9	Putative uncharacterized protein OS=Oryza sativa subsp. indica GN=OsI_19159 PE=4 SV=1 - [A2Y2C9_ORYSI]	8.19	1	catalytic activity	cytoplasm	metabolic process	Pf00704	1.07033		1.06162		1.26151		1.02361		1.05883		1.12385		31.8711	7.43018
Q6ZIG4	Os02g0186500 protein OS=Oryza sativa subsp. japonica GN=OJ1115_B01.27 PE=2 SV=1 - [Q6ZIG4_ORYSJ]	22.81	7	catalytic activity; nucleotide binding		metabolic process	Pf00069; Pf07714	0.919111	9.39153	0.896509	16.8033	0.919012	12.5909	1.03679	12.1737	1.03053	10.1644	1.00898	10.0111	42.0264	6.99072
B9ETW6	Putative uncharacterized protein OS=Oryza sativa subsp. japonica GN=OsJ_03881 PE=3 SV=1 - [B9ETW6_ORYSJ]	9.44	5	catalytic activity; nucleotide binding; protein binding	cytoplasm; membrane	metabolic process	Pf00069; Pf07714; Pf08263	0.97111	6.46703	0.886067	9.83229	0.90885	9.9119	0.944019	4.33599	0.990701	2.88278	0.951652	6.79782	103.696	6.7417
Q6YYV1	Os09g0115400 protein OS=Oryza sativa subsp. japonica GN=OJ1310_F05.15 PE=2 SV=1 - [Q6YYV1_ORYSJ]	12.99	7	nucleotide binding; RNA binding			Pf00076; Pf00658; Pf08777	0.948459	5.90182	0.961933	3.87797	1.00527	5.27062	0.927166	13.1918	0.961241	2.48361	0.908368	9.58828	71.5845	6.82959
Q75KZ3	Os05g0486700 protein OS=Oryza sativa subsp. japonica GN=OJ1004_E02.9 PE=2 SV=1 - [Q75KZ3_ORYSJ]	16.77	1		cytoplasm; cytosol; membrane; nucleus; organelle lumen; ribosome	cell communication; development; regulation of biological process; reproduction; response to stimulus	Pf01246	0.9133	4.28371	0.891462	9.24884	0.8163	10.9476	0.968659	4.19161	0.96917	7.14567	0.898794	9.74686	18.3262	10.7847
A2YC52	Putative uncharacterized protein OS=Oryza sativa subsp. indica GN=OsI_22684 PE=3 SV=1 - [A2YC52_ORYSI]	10.57	3	antioxidant activity; catalytic activity; metal ion binding	cytoplasm	metabolic process; response to stimulus	Pf00141	1.05144	8.90854	1.01649	6.9575	1.25804	22.7063	0.929797	7.28287	0.986495	12.8767	1.07912	19.5345	35.2787	6.68311
A2XTL5	Putative uncharacterized protein OS=Oryza sativa subsp. indica GN=OsI_15947 PE=4 SV=1 - [A2XTL5_ORYSI]	6.65	2	catalytic activity	cytoplasm; endoplasmic reticulum; membrane	cellular homeostasis; metabolic process; regulation of biological process	Pf00085	0.911453	2.50699	0.918557	7.44434	0.89537	12.4175	1.02681	10.754	1.06199	4.31243	1.02653	2.96282	46.748	4.86865
A2XIU7	Ribosomal protein L19 OS=Oryza sativa subsp. indica GN=OsI_12360 PE=3 SV=1 - [A2XIU7_ORYSI]	24.27	1	structural molecule activity	cytoplasm; cytosol; membrane; mitochondrion; nucleus; organelle lumen; ribosome	metabolic process	Pf01280	1.07104		1.09913		1.12989		1.01244		1.02606		1.07441		24.0444	11.3853
B8BIW4	Putative uncharacterized protein OS=Oryza sativa subsp. indica GN=OsI_34967 PE=4 SV=1 - [B8BIW4_ORYSI]	6.38	1	catalytic activity	cytoplasm; extracellular; vacuole	metabolic process	Pf06964	1.17345		2.89553		1.70185		1.02382		0.932236		1.29336		72.4805	5.23682
Q6H541	40S ribosomal protein S24 OS=Oryza sativa subsp. japonica GN=OSJNBb0035N08.11 PE=1 SV=1 - [Q6H541_ORYSJ]	25.36	3	nucleotide binding; structural molecule activity	cytoplasm; cytosol; membrane; nucleus; organelle lumen; ribosome	metabolic process	Pf01282	0.995924	6.0299	0.942249	15.5354	0.925945	12.614	1.04368	11.0575	1.05105	8.04116	1.02158	8.67742	15.7388	10.5649
A3BI11	Zinc transporter 8 OS=Oryza sativa subsp. japonica GN=ZIP8 PE=2 SV=1 - [ZIP8_ORYSJ]	3.33	1	transporter activity	cytoplasm; membrane	transport	Pf02535	1.03152	0.763032	0.923116	2.15896	0.999596	9.93116	0.948732	11.2196	1.00837	21.2932	0.983256	2.2079	40.2308	6.80029
A2XLX1	Putative uncharacterized protein OS=Oryza sativa subsp. indica GN=OsI_13477 PE=3 SV=1 - [A2XLX1_ORYSI]	10	2		cytoplasm; membrane; vacuole	transport	Pf01105	0.936983	6.40179	0.900484	11.7975	0.869899	11.8291	1.00469	10.6182	1.084	11.8041	1.00281	7.82541	23.665	7.32764
Q6EP35	Os02g0580900 protein OS=Oryza sativa subsp. japonica GN=B1267B06.37-1 PE=2 SV=1 - [Q6EP35_ORYSJ]	4.76	2	transporter activity	membrane	transport	Pf00854	1.29748	7.99932	1.54639	13.0585	1.48115	5.92994	0.967563	17.2911	0.874915	8.43008	0.990771	16.6119	64.6345	8.68994
Q0IPL3	Os12g0189300 protein OS=Oryza sativa subsp. japonica GN=Os12g0189300 PE=4 SV=1 - [Q0IPL3_ORYSJ]	12.2	4	catalytic activity	cytoplasm	metabolic process	Pf00463	0.964036	9.65044	0.924771	15.8152	0.950913	14.1575	1.07798	10.6727	1.08791	12.1795	1.05833	8.79793	34.6944	6.53662
B8APL1	Putative uncharacterized protein OS=Oryza sativa subsp. indica GN=OsI_13067 PE=4 SV=1 - [B8APL1_ORYSI]	6.26	7	catalytic activity; motor activity; nucleotide binding; protein binding; signal transducer activity	cytoskeleton; membrane	cell communication; cell differentiation; cell division; cell growth; cell organization and biogenesis; development; regulation of biological process; reproduction; response to stimulus	Pf00063; Pf01843; Pf02736	0.987353	4.78613	0.95753	16.8873	0.979796	17.0598	1.00383	11.6234	1.01081	8.66947	0.964745	7.14999	182.386	8.89502
A2WKH8	Putative uncharacterized protein OS=Oryza sativa subsp. indica GN=OsI_00329 PE=3 SV=1 - [A2WKH8_ORYSI]	7.62	3	catalytic activity; nucleotide binding	cytoplasm; endosome	cell organization and biogenesis; metabolic process; reproduction; transport	Pf00004; Pf01057; Pf01078; Pf04212; Pf06068; Pf07724; Pf07728; Pf09336	1.02305	3.81645	0.96355	5.59837	1.00215	18.1903	0.969838	3.56312	0.961661	3.4747	0.929352	8.7432	48.0465	7.84033
Q5JLH8	Os01g0534900 protein OS=Oryza sativa subsp. japonica GN=OJ1029_F04.29 PE=2 SV=1 - [Q5JLH8_ORYSJ]	9.38	7		cytoplasm; membrane		Pf02714	0.974235	7.00543	0.997014	11.2276	0.888068	9.52829	0.977596	3.80686	1.05425	9.19708	1.0191	6.51107	87.7963	8.60205
J7H3S8	Allene oxide cyclase 4 OS=Oryza sativa subsp. indica GN=AOC4 PE=2 SV=1 - [J7H3S8_ORYSI]	15.42	3				Protein not found	0.920643	7.05971	0.901631	9.77613	0.913592	19.3114	0.996096	11.5344	1.03804	6.99079	0.978683	10.6155	25.9744	9.23193
A3ABR0	Putative uncharacterized protein OS=Oryza sativa subsp. japonica GN=OsJ_08520 PE=4 SV=1 - [A3ABR0_ORYSJ]	14.66	3	catalytic activity; metal ion binding	cytoplasm	metabolic process	Pf00719	0.993948	3.39899	0.940474	10.1678	0.943843	8.19484	1.02559	10.5735	1.0809	4.5061	1.0025	3.28142	25.5834	5.8335
Q8H8B3	Putative uncharacterized protein OJ1134F05.16 OS=Oryza sativa subsp. japonica GN=OJ1134F05.16 PE=3 SV=1 - [Q8H8B3_ORYSJ]	13.71	2	catalytic activity; nucleotide binding	membrane	metabolic process	Pf00069; Pf07714	1.01456	27.0241	1.08118	51.9742	1.10702	39.2237	1.15993	12.3047	1.00426	16.9891	1.19088	14.1158	39.4684	6.81494
Q2QX54	Expressed protein OS=Oryza sativa subsp. japonica GN=LOC_Os12g07140 PE=3 SV=2 - [Q2QX54_ORYSJ]	15.38	1	transporter activity	membrane	transport	Pf00137	0.944503	9.92802	1.02785	10.5116	0.935814	11.34	1.06457	7.63442	1.03823	7.93179	1.04384	8.05155	12.7497	10.9458
Q6K8R0	Putative eukaryotic translation initiation factor 2A OS=Oryza sativa subsp. japonica GN=OJ1058_F07.22 PE=4 SV=1 - [Q6K8R0_ORYSJ]	11.07	5	protein binding; RNA binding		metabolic process	Pf08662	1.05687	6.27252	1.1288	23.1848	1.06708	20.2346	0.937076	8.49427	0.97696	5.48282	1.02222	10.2815	55.1487	8.76318
A2Y0P8	Putative uncharacterized protein OS=Oryza sativa subsp. indica GN=OsI_18572 PE=3 SV=1 - [A2Y0P8_ORYSI]	6.89	3	catalytic activity; nucleotide binding	cytoplasm	metabolic process	Pf00069; Pf07714; Pf11721; Pf12819	0.90714	1.82058	0.935929	19.6079	1.08688	16.8113	1.02935	3.1502	0.971706	14.3131	1.05331	3.73721	93.2976	7.48877
Q40682	Elongation factor 1-delta 2 OS=Oryza sativa subsp. japonica GN=Os03g0406200 PE=2 SV=3 - [EF1D2_ORYSJ]	23.89	2	RNA binding	cytoplasm; membrane	metabolic process; response to stimulus	Pf00736	1.00565	3.66742	0.916086	5.85355	0.948376	5.73648	1.00387	1.66606	1.05153	6.43139	0.923409	20.1394	24.6392	4.52588
Q0JBH7	Os04g0531400 protein OS=Oryza sativa subsp. japonica GN=Os04g0531400 PE=3 SV=1 - [Q0JBH7_ORYSJ]	4.4	2	catalytic activity; nucleotide binding	cytoplasm	metabolic process	Pf00069; Pf00139; Pf07714	1.0965	6.59677	1.10148	14.4623	1.3023	22.8998	0.993485	11.1449	1.02789	12.5586	1.1678	26.0045	70.0096	7.86963
Q75H81	Serpin-ZXA OS=Oryza sativa subsp. japonica GN=Os03g0610650 PE=1 SV=1 - [SPZXA_ORYSJ]	12.88	4	enzyme regulator activity		metabolic process; regulation of biological process	Pf00079	1.05399	2.23129	1.20528	27.662	1.24591	24.6943	0.989103	6.23832	0.836248	16.3365	0.977091	5.19684	42.1139	6.15088
B7E905	Os09g0501100 protein OS=Oryza sativa subsp. japonica GN=Os09g0501100 PE=2 SV=1 - [B7E905_ORYSJ]	28.57	1	structural molecule activity	cytoplasm; cytosol; mitochondrion; nucleus; organelle lumen; ribosome	metabolic process	Pf01655	1.14312	7.79299	1.37077	6.62627	1.25167	7.58577	1.1465	1.56506	0.918501	1.99942	1.0052	5.77735	15.7206	10.5796
Q6ZF83	Serine/threonine-protein kinase OS=Oryza sativa subsp. japonica GN=P0013G11.16 PE=2 SV=1 - [Q6ZF83_ORYSJ]	9.83	6	catalytic activity; nucleotide binding		cell communication; metabolic process; reproduction	Pf00069; Pf00954; Pf01453; Pf07714; Pf08276	1.06911	11.0516	1.22887	26.4715	1.11672	18.3269	1.04697	10.6808	1.02177	7.95713	1.00596	7.22825	90.357	7.04932
B8A9J6	Putative uncharacterized protein OS=Oryza sativa subsp. indica GN=OsI_05287 PE=4 SV=1 - [B8A9J6_ORYSI]	9.95	5	catalytic activity; metal ion binding	cytoplasm; endoplasmic reticulum; membrane; vacuole	metabolic process	Pf02666	1.04277	13.0704	1.15587	20.6173	1.07129	13.6596	0.982499	4.2506	0.934755	13.1103	0.969811	7.51915	67.8594	5.79541
Q10LN5	Bidirectional sugar transporter SWEET16 OS=Oryza sativa subsp. japonica GN=SWEET16 PE=3 SV=1 - [SWT16_ORYSJ]	4.88	1	transporter activity	membrane	transport	Pf03083	0.867353	103.238	0.956714	50.7155	1.22809	82.2462	0.82288	27.195	0.806871	71.9234	1.01538	46.5845	35.3686	9.02686
B9GCI0	Putative uncharacterized protein OS=Oryza sativa subsp. japonica GN=OsJ_35661 PE=4 SV=1 - [B9GCI0_ORYSJ]	2.86	1	catalytic activity; nucleotide binding; protein binding	cytoplasm; membrane; mitochondrion	metabolic process	Pf00069; Pf07714	0.996168	6.96906	0.975341	14.4956	1.08004	17.0956	1.04221	8.63765	1.02352	0.101017	1.0712	3.86016	77.8922	6.68311
Q94DM7	Os01g0962600 protein OS=Oryza sativa subsp. japonica GN=P0483G10.27 PE=4 SV=1 - [Q94DM7_ORYSJ]	21.23	1		cytoplasm; cytosol; membrane; ribosome		Pf03501	0.853676	4.63807	0.76624	8.11255	0.736474	1.13657	1.03032	7.43105	0.9743	1.30851	0.94008	3.38105	19.898	9.80322
A3C7S0	Putative uncharacterized protein OS=Oryza sativa subsp. japonica GN=OsJ_32634 PE=4 SV=1 - [A3C7S0_ORYSJ]	7.27	6	catalytic activity; nucleotide binding; protein binding; receptor activity; signal transducer activity		cell communication; metabolic process; regulation of biological process; response to stimulus	Pf00069; Pf00989; Pf07714; Pf08447	0.805047	18.0453	0.775663	18.0319	0.845424	19.9113	1.22976	7.60724	1.23685	12.5699	1.17851	8.64253	95.6688	8.44092
A2ZAI6	Putative uncharacterized protein OS=Oryza sativa subsp. indica GN=OsI_34763 PE=4 SV=1 - [A2ZAI6_ORYSI]	3.12	7	protein binding	cytoplasm; endoplasmic reticulum; endosome; membrane; vacuole	cell division; cell organization and biogenesis; development; reproduction; response to stimulus; transport	Pf00226	0.970615	9.80089	1.10385	12.028	1.06953	7.21721	1.03657	3.60052	1.06341	10.6411	1.03871	14.99	287.456	6.40479
Q69V55	Putative uncharacterized protein P0556B08.19-2 OS=Oryza sativa subsp. japonica GN=P0556B08.19-2 PE=4 SV=1 - [Q69V55_ORYSJ]	8.92	2	protein binding			Pf07002	1.22977	23.9357	1.76998	23.0795	1.20629	17.4092	1.19188	19.7947	0.943556	19.7906	1.06059	13.5717	46.2186	5.71924
A2YSZ2	Putative uncharacterized protein OS=Oryza sativa subsp. indica GN=OsI_28443 PE=4 SV=1 - [A2YSZ2_ORYSI]	11.7	1	nucleotide binding	cytoplasm; nucleus	cell communication; regulation of biological process; response to stimulus	Pf00025; Pf00071; Pf04670	0.93919	4.16022	0.845494	4.95053	0.872569	8.3071	0.943399	6.70919	1.03967	6.68998	0.912109	4.33339	10.9307	8.1626
Q0DQ28	Os03g0641200 protein OS=Oryza sativa subsp. japonica GN=Os03g0641200 PE=4 SV=1 - [Q0DQ28_ORYSJ]	3.54	2	transporter activity	membrane	transport	Pf00324	1.15351	18.2714	1.23358	30.2623	1.04404	6.08753	1.02568	3.63531	0.877452	23.6563	0.944318	12.8111	62.9756	7.66455
Q53KN6	DnaJ protein, putative OS=Oryza sativa subsp. japonica GN=LOC_Os03g44620 PE=3 SV=1 - [Q53KN6_ORYSJ]	12.98	2	metal ion binding; nucleotide binding; protein binding	cytoplasm	metabolic process; response to stimulus	Pf00226; Pf00684; Pf01556	1.02614	10.557	0.989751	18.5739	0.832036	8.17573	0.96538	8.64996	0.989452	9.53974	0.992301	17.845	46.3988	6.41748
Q84TB3	Actin-depolymerizing factor 4 OS=Oryza sativa subsp. japonica GN=ADF4 PE=2 SV=1 - [ADF4_ORYSJ]	18.71	2	protein binding			Pf00241	1.08148	3.83277	1.03528	11.3537	1.10524	36.8361	0.96342	7.23072	0.915181	8.64573	1.01948	17.0795	15.936	6.03662
B9FNC6	Putative uncharacterized protein OS=Oryza sativa subsp. japonica GN=OsJ_17698 PE=4 SV=1 - [B9FNC6_ORYSJ]	8.53	8		cytoplasm; membrane		Pf07774	1.01426	13.9526	0.992778	17.3002	1.08209	19.3579	1.01785	11.194	0.98772	9.09754	0.999778	5.24183	105.764	6.81494
B8AL50	Putative uncharacterized protein OS=Oryza sativa subsp. indica GN=OsI_12343 PE=4 SV=1 - [B8AL50_ORYSI]	11.76	5	protein binding	proteasome	response to stimulus	Pf01399	1.01066	21.7953	1.0808	37.1791	0.935589	15.0338	1.05811	11.3856	0.953856	11.3619	0.981691	8.28977	47.563	5.96045
Q0JD43	OSJNBa0084A10.16 protein OS=Oryza sativa subsp. japonica GN=OSJNBa0084A10.16 PE=2 SV=1 - [Q0JD43_ORYSJ]	11.85	4	catalytic activity	cytoplasm; cytosol; membrane; nucleus	development; metabolic process	Pf04853	1.07656	12.7873	1.04224	9.0349	1.06139	4.88912	0.913393	7.65593	0.907278	4.14046	0.914942	6.46646	64.3702	6.69775
Q10M78	Alpha-L-arabinofuranosidase C-terminus family protein, expressed OS=Oryza sativa subsp. japonica GN=LOC_Os03g20420 PE=4 SV=1 - [Q10M78_ORYSJ]	7.16	3	catalytic activity	cytoplasm; extracellular; vacuole	metabolic process	Pf06964	0.996119	4.232	1.09172	14.8463	1.09982	20.1621	1.14429	10.0234	1.20097	5.8091	1.19908	1.91466	56.746	5.35107
Q6AV51	HIPL1 protein, putative, expressed OS=Oryza sativa subsp. japonica GN=OSJNBb0101N11.10 PE=4 SV=1 - [Q6AV51_ORYSJ]	7.16	3	catalytic activity	cytoplasm; membrane	metabolic process		0.955231	6.92005	0.922466	21.3266	0.922703	36.2353	0.905497	8.76073	0.931521	9.24286	0.914019	15.7854	74.7274	5.40186
A2XN40	Serine/threonine-protein phosphatase PP2A-2 catalytic subunit OS=Oryza sativa subsp. indica GN=PP2A2 PE=2 SV=2 - [PP2A2_ORYSI]	6.84	2	catalytic activity; metal ion binding	cytoplasm; membrane; nucleus; organelle lumen		Pf00149	1.01411	6.23989	0.991171	23.0062	0.940777	16.5346	0.906102	5.638	1.05725	19.2276	0.984395	16.4588	35.2201	5.32568
A2ZXL3	Putative uncharacterized protein OS=Oryza sativa subsp. japonica GN=OsJ_03377 PE=4 SV=1 - [A2ZXL3_ORYSJ]	18.97	4		cytoplasm; endoplasmic reticulum; membrane		Pf02453	1.03341	5.76669	0.952795	7.88037	0.971673	5.31413	0.919614	7.69573	0.992329	5.95986	0.89938	10.5777	28.257	8.35303
Q10KZ7	Os03g0364400 protein OS=Oryza sativa subsp. japonica GN=Os03g0364400 PE=2 SV=1 - [Q10KZ7_ORYSJ]	13.65	4	catalytic activity; nucleotide binding		metabolic process	Pf00069; Pf07714	1.08673	17.0487	1.2472	27.3159	1.18409	31.1643	1.10597	10.848	0.98238	13.3495	1.06085	12.8946	47.8366	9.61279
Q5VRM0	Os06g0115300 protein OS=Oryza sativa subsp. japonica GN=OSJNBa0019F11.14 PE=4 SV=1 - [Q5VRM0_ORYSJ]	32.97	2		cytoplasm; cytosol; membrane	response to stimulus; transport	Pf00887	1.13696	8.02366	1.07341	13.7103	1.1815	28.381	0.908573	10.2742	0.919232	21.3685	0.943231	8.11051	10.2422	5.04639
Q6YS69	Os08g0308100 protein OS=Oryza sativa subsp. japonica GN=B1052H09.108 PE=4 SV=1 - [Q6YS69_ORYSJ]	16.56	5	protein binding		response to stimulus	Pf00400	0.944428	3.2657	0.880061	13.8164	0.908266	9.45884	0.998271	7.82303	1.0313	8.06587	0.981	8.10904	36.3563	6.39209
Q94DU4	Putative receptor-like protein kinase OS=Oryza sativa subsp. japonica GN=P0454H12.41 PE=4 SV=1 - [Q94DU4_ORYSJ]	10.05	4	catalytic activity; nucleotide binding; protein binding		metabolic process	Pf00069; Pf07714; Pf08263; Pf12799	1.08699	9.26784	1.38831	20.9389	1.23976	13.5688	1.0683	14.3283	0.937414	16.6455	0.989906	9.74077	69.1775	8.42627
A2ZLT1	Putative uncharacterized protein OS=Oryza sativa subsp. indica GN=OsI_38775 PE=4 SV=1 - [A2ZLT1_ORYSI]	6.43	4	transporter activity	cytoplasm	transport	Pf03810	1.02332	5.20886	0.944056	14.6281	1.01115	28.5355	0.991462	5.79136	0.964928	11.4862	0.989101	10.8356	84.5807	4.77979
Q259N9	H0818H01.10 protein OS=Oryza sativa GN=H0818H01.10 PE=3 SV=1 - [Q259N9_ORYSA]	14.42	1	catalytic activity; nucleotide binding		metabolic process	Pf01633; Pf01636	1.18947	0.212306	1.3355	21.6297	1.368	20.2723	1.11601	8.15608	0.942178	3.41096	1.0695	10.0461	48.4355	6.63916
Q9XGP7	Tricin synthase 1 OS=Oryza sativa subsp. japonica GN=ROMT-15 PE=1 SV=1 - [OMT15_ORYSJ]	9.13	2	catalytic activity; metal ion binding	nucleus	metabolic process	Pf01596	1.04562	7.2968	0.99105	5.88797	1.08765	0.601635	0.935603	9.12089	1.00882	10.6621	1.09241	11.4769	27.7543	5.31299
B9FQV1	Putative uncharacterized protein OS=Oryza sativa subsp. japonica GN=OsJ_22633 PE=4 SV=1 - [B9FQV1_ORYSJ]	4.91	3		membrane		Pf04424	0.953971	10.3871	0.90669	9.78205	0.92073	7.19179	0.953375	11.9394	0.983764	5.33895	0.964675	3.14436	78.7829	4.55127
A2ZM62	Putative uncharacterized protein OS=Oryza sativa subsp. indica GN=OsI_38919 PE=3 SV=1 - [A2ZM62_ORYSI]	6.18	4	catalytic activity; metal ion binding; nucleotide binding; protein binding; transporter activity	cytoplasm; endoplasmic reticulum; membrane	metabolic process; transport	Pf00122; Pf00689; Pf00690; Pf00702; Pf08282; Pf12515; Pf12710	1.10111	20.2071	1.01654	13.0921	1.22501	8.10998	1.01872	9.32837	0.94634	5.14586	1.02703	0.483054	111.012	5.94775
B8AYF0	Putative uncharacterized protein OS=Oryza sativa subsp. indica GN=OsI_18578 PE=4 SV=1 - [B8AYF0_ORYSI]	13.96	3		cytoplasm		Pf02469	0.772956	6.80862	0.684084	4.77534	0.680095	18.9741	1.22303	5.36106	1.28778	14.2178	1.18519	11.8197	26.643	9.36377
B8AXL2	Putative uncharacterized protein OS=Oryza sativa subsp. indica GN=OsI_18315 PE=3 SV=1 - [B8AXL2_ORYSI]	8.79	5	catalytic activity; nucleotide binding	cytoplasm; membrane	metabolic process	Pf00069; Pf01657; Pf07714	1.0464	15.9919	1.01483	26.2096	0.959714	23.7261	0.853891	20.2379	0.893561	1.97969	0.893624	13.2245	72.2862	7.2251
A6N150	Ribonuclease 3 OS=Oryza sativa subsp. indica PE=2 SV=1 - [A6N150_ORYSI]	27.53	6	catalytic activity; RNA binding	cytoplasm		Pf00445	0.954837	4.4084	0.842084	11.1338	0.873295	5.08477	0.978277	14.0476	1.07056	9.63153	1.03085	8.10723	27.9026	5.88428
Q0DG77	Os05g0549000 protein OS=Oryza sativa subsp. japonica GN=Os05g0549000 PE=4 SV=1 - [Q0DG77_ORYSJ]	11.64	6	protein binding	cytoplasm; membrane	cell organization and biogenesis; transport	Pf01417; Pf07651; Pf09770	0.976985	10.5484	0.918366	13.7102	0.962923	9.84302	0.950775	4.695	0.971109	4.51186	0.937009	7.39721	63.0088	5.37646
Q6ZD35	Os08g0538000 protein OS=Oryza sativa subsp. japonica GN=P0665C04.32 PE=4 SV=1 - [Q6ZD35_ORYSJ]	17.19	10	catalytic activity; nucleotide binding	cytoplasm; mitochondrion	metabolic process; response to stimulus	Pf00587; Pf03129	0.969209	9.67308	0.922462	13.6878	0.922946	15.8776	0.958812	3.1974	0.98147	6.08626	0.961737	5.53505	77.0256	6.32861
Q5JMQ1	Os01g0936100 protein OS=Oryza sativa subsp. japonica GN=P0492G09.34 PE=2 SV=1 - [Q5JMQ1_ORYSJ]	6.11	2	catalytic activity; nucleotide binding	membrane	metabolic process	Pf00069; Pf07714	0.964918	6.94219	0.990639	4.59263	0.943122	2.73976	0.990624	5.41908	0.971318	2.2857	0.951068	13.1015	54.0321	9.17334
Q7F0M8	Putative CRK1 protein(Cdc2-related kinase 1) OS=Oryza sativa subsp. japonica GN=P0450A04.137 PE=4 SV=1 - [Q7F0M8_ORYSJ]	17.8	4	catalytic activity; nucleotide binding	membrane	metabolic process	Pf00069; Pf07714	0.951742	8.12428	0.95539	33.3605	0.949239	11.3294	0.960158	26.6566	1.06541	4.22539	1.00124	12.6668	62.6712	9.39307
A3C2J5	Putative uncharacterized protein OS=Oryza sativa subsp. japonica GN=OsJ_30729 PE=4 SV=1 - [A3C2J5_ORYSJ]	6	2	transporter activity	membrane	transport	Pf00854	1.13786	1.91831	1.30111	4.90039	1.12475	30.0921	1.1613	9.50873	1.05038	9.23139	1.1392	19.6828	52.6082	8.39697
A2Z735	Putative uncharacterized protein OS=Oryza sativa subsp. indica GN=OsI_33509 PE=3 SV=1 - [A2Z735_ORYSI]	9.81	3	catalytic activity; nucleotide binding	cytoplasm; membrane; nucleus	metabolic process	Pf00069; Pf07714	0.935919	8.24967	0.94775	7.41539	0.928697	2.69363	1.01344	18.6297	1.02188	7.36683	1.00576	3.00628	46.8049	9.46631
B9W0A6	Mitogen-activated protein kinase 4 OS=Oryza sativa subsp. indica GN=MPK4 PE=2 SV=1 - [B9W0A6_ORYSI]	12.23	4	catalytic activity; nucleotide binding; signal transducer activity	cytoplasm; nucleus	cell communication; cell organization and biogenesis; defense response; metabolic process; regulation of biological process; response to stimulus	Pf00069; Pf07714	1.00698	7.58431	0.952014	5.63092	1.00813	14.2961	0.963789	6.49537	0.993809	11.6082	1.00205	14.8985	42.7776	6.84424
Q8L3Y6	Putative 60S ribosomal protein L24 OS=Oryza sativa subsp. japonica GN=OJ1118_B03.114 PE=4 SV=1 - [Q8L3Y6_ORYSJ]	16.88	1		cytoplasm; cytosol; membrane; nucleus; organelle lumen; ribosome	cell communication; development; regulation of biological process; reproduction; response to stimulus	Pf01246	0.918854		0.952196		0.848808		1.05618		1.01931		1.0192		18.2021	10.7114
D3DF43	ATP synthase subunit alpha OS=Oryza sativa subsp. indica GN=atp1 PE=3 SV=1 - [D3DF43_ORYSI]	10.22	4	catalytic activity; nucleotide binding; transporter activity	cytoplasm; membrane; mitochondrion	metabolic process; transport	Pf00006; Pf00306; Pf02874; Pf09378	0.80199	17.9828	0.83605	23.1263	0.863008	13.2342	1.14173	6.34309	1.11782	13.4262	1.08478	8.78861	55.2468	6.1001
Q94E74	Os01g0511100 protein OS=Oryza sativa subsp. japonica GN=OSJNBa0054L14.5 PE=2 SV=1 - [Q94E74_ORYSJ]	13.17	2			response to stimulus	Pf00582	1.03624	2.37982	1.03688	5.70143	1.05163	8.79692	0.935503	1.99241	0.987739	4.89166	0.904041	0.431928	17.9104	7.45947
B8AA60	Putative uncharacterized protein OS=Oryza sativa subsp. indica GN=OsI_03915 PE=3 SV=1 - [B8AA60_ORYSI]	9.07	4	catalytic activity; nucleotide binding; RNA binding	cytoplasm	transport	Pf00448; Pf02881; Pf02978; Pf03205	0.987259	7.35759	0.970077	16.4098	1.00373	13.1027	0.939613	6.27349	1.00228	8.5548	0.962154	10.9099	54.7379	9.24658
Q10LN7	60S ribosomal protein L18 OS=Oryza sativa subsp. japonica GN=Os03g0341100 PE=3 SV=1 - [Q10LN7_ORYSJ]	28.34	3	structural molecule activity	cytoplasm; cytosol; membrane; ribosome; vacuole	metabolic process	Pf00828	0.934703	7.57888	0.914146	7.41392	0.998658	22.5191	1.07071	9.82782	1.04286	8.26258	1.11479	22.1216	21.0607	11.4292
Q6YUH7	Os02g0697300 protein OS=Oryza sativa subsp. japonica GN=P0666E12.11 PE=2 SV=1 - [Q6YUH7_ORYSJ]	10.71	4		membrane	transport	Pf00790; Pf01417; Pf03127	1.13026	7.1816	1.08128	12.3484	1.04951	12.7498	0.928816	11.8914	0.909671	7.50723	0.915763	13.1065	43.5797	4.76709
A3C0Z2	Triosephosphate isomerase OS=Oryza sativa subsp. japonica GN=OsJ_30136 PE=3 SV=1 - [A3C0Z2_ORYSJ]	16.73	3	catalytic activity	cytoplasm	metabolic process	Pf00121	0.95568	6.21753	0.888941	9.45266	0.95958	13.9981	1.01065	7.67167	1.04666	4.96984	1.00317	10.069	25.9935	8.52881
B9FJ36	Putative uncharacterized protein OS=Oryza sativa subsp. japonica GN=OsJ_17593 PE=3 SV=1 - [B9FJ36_ORYSJ]	8.57	6	catalytic activity; nucleotide binding	membrane	metabolic process; response to stimulus	Pf00005; Pf01061; Pf03193	0.962217	10.8071	1.02966	9.74815	0.960297	9.3976	1.03671	12.8575	1.06421	8.96118	1.03033	6.41186	77.4699	9.24658
B9FA13	Serine/threonine-protein phosphatase OS=Oryza sativa subsp. japonica GN=OsJ_11899 PE=3 SV=1 - [B9FA13_ORYSJ]	9.72	6	catalytic activity; metal ion binding; protein binding	cytoplasm; cytosol; membrane		Pf00149; Pf07646	1.05181	14.1365	1.11635	17.0927	1.03567	24.8864	0.942745	11.7108	0.979447	4.1121	1.03845	6.83041	99.7543	6.21436
B8B082	Putative uncharacterized protein OS=Oryza sativa subsp. indica GN=OsI_20751 PE=4 SV=1 - [B8B082_ORYSI]	15.49	4		cytoplasm; membrane; nucleus		Pf04774	1.10929	16.9678	1.12792	14.3753	1.17897	23.2211	0.997575	8.53197	0.910648	3.14925	0.985508	8.24102	40.9072	8.71924
Q0JAI9	Secretory carrier-associated membrane protein 6 OS=Oryza sativa subsp. japonica GN=SCAMP6 PE=2 SV=1 - [SCAM6_ORYSJ]	9.52	2		cytoplasm; membrane; mitochondrion	transport	Pf04144	0.969847	6.17925	0.889461	5.94128	0.879676	5.0191	1.03186	5.72537	1.1499	3.18248	0.990605	4.32693	30.4815	6.85889
Q6YXZ6	Os02g0139300 protein OS=Oryza sativa subsp. japonica GN=OSJNBa0026E05.37 PE=2 SV=1 - [Q6YXZ6_ORYSJ]	10.63	4	catalytic activity	cytoplasm; membrane; vacuole	metabolic process	Pf00332; Pf07983	1.01386	12.43	1.10958	13.6977	1.02445	10.2035	1.01764	8.78913	1.02559	8.40708	0.982359	7.28243	53.3402	5.46533
A2ZAS9	Non-specific lipid-transfer protein 3 OS=Oryza sativa subsp. indica GN=LTP110-A PE=2 SV=1 - [NLTP3_ORYSI]	33.06	4			defense response; response to stimulus; transport	Pf00234	0.672117	15.0125	0.729557	23.9102	0.644906	22.9496	1.30092	23.4852	1.27137	11.8435	1.2057	19.4439	12.1369	8.90967
B9FML9	Putative uncharacterized protein OS=Oryza sativa subsp. japonica GN=OsJ_17222 PE=4 SV=1 - [B9FML9_ORYSJ]	1.84	1		cytoplasm; cytosol; mitochondrion		Pf03961; Pf12128	0.947116		0.882709		0.878409		0.906124		1.15944		1.04571		79.872	4.99561
Q5Z4F3	Blue copper binding protein-like OS=Oryza sativa subsp. japonica GN=OSJNBa0076I16.37 PE=2 SV=1 - [Q5Z4F3_ORYSJ]	13.25	2	metal ion binding	cytoplasm		Pf02298	0.924684	2.09379	0.948657	7.40632	0.904382	5.05531	1.00384	14.7189	0.967142	34.834	0.950773	18.2837	17.2837	8.48486
B9FSE6	Putative uncharacterized protein OS=Oryza sativa subsp. japonica GN=OsJ_20744 PE=4 SV=1 - [B9FSE6_ORYSJ]	2.67	1					1.03687	14.253	1.14202	37.687	1.49426	35.628	0.572534	67.5513	0.769308	40.6798	0.967336	31.566	59.7676	4.08154
Q5QLM8	Receptor protein kinase-like OS=Oryza sativa subsp. japonica GN=P0047F09.19 PE=3 SV=1 - [Q5QLM8_ORYSJ]	12.02	5	catalytic activity; nucleotide binding; protein binding		cell communication; metabolic process; reproduction	Pf00069; Pf00954; Pf07714; Pf08276	0.962758	11.946	0.934239	19.1725	0.909481	21.5245	0.988732	10.7127	0.944768	10.9595	0.97173	4.71039	69.3345	7.32764
Q5JKQ2	Putative seryl-tRNA synthetase OS=Oryza sativa subsp. japonica GN=B1064G04.18-2 PE=2 SV=1 - [Q5JKQ2_ORYSJ]	8	3	catalytic activity; nucleotide binding	cytoplasm	metabolic process; response to stimulus	Pf00587; Pf02403; Pf03961	1.0526	9.3489	1.11043	12.2315	1.25074	27.7449	0.899018	5.25217	0.920468	10.6356	0.942423	16.359	45.4153	6.7417
A3AQL3	Putative uncharacterized protein OS=Oryza sativa subsp. japonica GN=OsJ_13676 PE=4 SV=1 - [A3AQL3_ORYSJ]	11.08	4	catalytic activity; nucleotide binding		metabolic process	Pf00069; Pf00139; Pf07714	0.914251	3.7125	0.828004	7.58666	0.965709	13.2466	1.04915	3.96475	1.08639	8.57139	1.06919	7.35335	45.7458	9.26123
B9ETC3	Putative uncharacterized protein OS=Oryza sativa subsp. japonica GN=OsJ_03676 PE=4 SV=1 - [B9ETC3_ORYSJ]	11.93	3		membrane	transport	Pf04144	0.97516	13.022	1.05837	16.3455	1.02151	21.9841	1.01237	4.29229	1.01546	7.02152	1	7.26129	31.9326	8.52881
A2WZK9	Putative uncharacterized protein OS=Oryza sativa subsp. indica GN=OsI_05394 PE=4 SV=1 - [A2WZK9_ORYSI]	4.83	1	transporter activity	cytoplasm; membrane	transport	Pf02535	0.62614	39.7733	0.919557		0.762878	101.21	1.5572	1.3898	1.39961	12.6888	1.29475	19.0818	37.5056	8.90967
Q8H903	60 kDa chaperonin OS=Oryza sativa subsp. japonica GN=OSJNBa0071K18.10 PE=2 SV=1 - [Q8H903_ORYSJ]	10.98	5	metal ion binding; nucleotide binding; protein binding	cytoplasm; cytosol; membrane; mitochondrion; organelle lumen; ribosome	metabolic process; response to stimulus	Pf00118	0.876857	9.838	0.905445	21.3347	0.855361	21.7093	1.09714	10.4849	1.14515	19.2431	1.16633	20.7544	60.812	5.87158
Q8H3M0	Os08g0428800 protein OS=Oryza sativa subsp. japonica GN=P0479C08.106 PE=3 SV=1 - [Q8H3M0_ORYSJ]	9.55	1	DNA binding	chromosome; membrane; nucleus	cell organization and biogenesis; metabolic process; regulation of biological process	Pf00538	1.07801	0.119322	1.08871	6.8931	1.08872	8.42858	0.879775	2.51665	0.885102	13.5275	0.942845	2.73628	18.66	10.4624
Q6YUK5	T-complex protein 1 subunit delta OS=Oryza sativa subsp. japonica GN=OSJNBb0037J12.26 PE=2 SV=1 - [Q6YUK5_ORYSJ]	16.48	8	nucleotide binding; protein binding	cytoplasm	metabolic process; response to stimulus	Pf00118	0.979974	7.16061	1.03374	11.2556	0.949154	12.3619	1.03293	12.1128	0.9545	8.63768	0.954943	11.4673	57.7117	6.99072
Q5JQD7	Probable metal-nicotianamine transporter YSL12 OS=Oryza sativa subsp. japonica GN=YSL12 PE=2 SV=2 - [YSL12_ORYSJ]	5.16	1		membrane	transport	Pf03169	0.971236		1.14743		0.980646		0.963156		0.899794		1.15348		77.6411	8.76318
Q2QMP4	LIM domain-containing protein, putative, expressed OS=Oryza sativa subsp. japonica GN=LOC_Os12g40490 PE=2 SV=2 - [Q2QMP4_ORYSJ]	7.41	3	metal ion binding; protein binding	cytoplasm; mitochondrion	development; regulation of biological process; reproduction	Pf00412; Pf12315	1.26448	6.83131	0.891896	9.60322	0.869788	7.94914	0.904489	5.19444	0.824683	29.8907	0.877544	11.8182	54.9796	5.96045
Q0DAZ7	Os06g0611900 protein OS=Oryza sativa subsp. japonica GN=Os06g0611900 PE=4 SV=1 - [Q0DAZ7_ORYSJ]	5.61	4	catalytic activity		metabolic process	Pf02347	0.95559	11.9166	0.935132	13.968	0.903274	7.77239	1.04569	10.1706	1.06733	10.8736	1.03226	7.08258	96.8912	6.41748
Q0JQM5	Os01g0151400 protein OS=Oryza sativa subsp. japonica GN=Os01g0151400 PE=4 SV=1 - [Q0JQM5_ORYSJ]	9.65	2	catalytic activity	cytoplasm; vacuole	metabolic process; response to stimulus	Pf01019	1.17324	11.7051	1.68217	2.27152	1.09534	5.63995	1.05282	43.5089	1.0484	12.1343	1.20134	46.122	43.5824	7.45947
Q93WY5	Os09g0467200 protein OS=Oryza sativa subsp. japonica GN=Os09g0467200 PE=2 SV=1 - [Q93WY5_ORYSJ]	13.9	3	catalytic activity; protein binding			Pf00043; Pf02798	1.0907	5.82975	1.08168	16.3014	1.08296	14.2293	0.893159	20.2199	0.86068	26.1553	0.787132	15.1329	25.17	5.70654
Q7F1J8	DnaJ protein family-like OS=Oryza sativa subsp. japonica GN=OJ1081_B12.119 PE=2 SV=1 - [Q7F1J8_ORYSJ]	10.66	3	protein binding		metabolic process	Pf00226	0.931725	11.1044	0.955398	9.16999	0.9694	12.7809	0.914634	6.89309	0.991316	11.4656	0.932166	4.30992	44.205	5.63037
B8AGT3	Putative uncharacterized protein OS=Oryza sativa subsp. indica GN=OsI_08465 PE=4 SV=1 - [B8AGT3_ORYSI]	9	2	catalytic activity; nucleotide binding	membrane	metabolic process	Pf01370; Pf04321; Pf07993	0.929947	8.9974	0.856138	6.88101	0.852301	5.01235	0.889151	3.31296	0.926579	11.3927	0.877266	10.3927	34.5174	6.25244
A2YSI0	Putative uncharacterized protein OS=Oryza sativa subsp. indica GN=OsI_28283 PE=3 SV=1 - [A2YSI0_ORYSI]	15.59	6	catalytic activity	cytoplasm	metabolic process	Pf00332; Pf07983	1.04474	12.928	1.04308	12.1423	1.00445	17.0257	1.07306	5.98536	0.995386	7.44057	0.97189	8.5732	52.4651	5.36377
Q6Z338	Putative uncharacterized protein B1121A12.22 OS=Oryza sativa subsp. japonica GN=B1121A12.22 PE=4 SV=1 - [Q6Z338_ORYSJ]	25	1		cytoplasm; mitochondrion			0.59276		0.891108		0.591129		1.15988		1.68983		1.16593		9.27148	6.75635
B9EUV1	Putative uncharacterized protein OS=Oryza sativa subsp. japonica GN=OsJ_04211 PE=4 SV=1 - [B9EUV1_ORYSJ]	9.84	3	metal ion binding	membrane			0.937948	11.5308	1.07872	11.3542	1.01486	16.9578	1.05415	6.83205	1.01289	13.1218	1.03187	12.15	42.2865	7.79639
A2Z3W4	Putative uncharacterized protein OS=Oryza sativa subsp. indica GN=OsI_32329 PE=4 SV=1 - [A2Z3W4_ORYSI]	3.96	3		membrane	cell organization and biogenesis		1.12093	0.627367	1.14373	1.93827	1.09735	24.0127	0.991641	6.61547	0.926255	4.30393	0.884156	0.419252	94.1989	5.37646
B8BEP4	Putative uncharacterized protein OS=Oryza sativa subsp. indica GN=OsI_30981 PE=4 SV=1 - [B8BEP4_ORYSI]	6.07	3	catalytic activity; nucleotide binding	membrane	metabolic process	Pf00069; Pf07714; Pf11721; Pf12819	0.937067	3.13425	0.84659	20.3362	0.88929	4.97194	1.04403	6.35055	1.03144	0.19258	0.94106	6.15243	112.099	8.22119
B8AT93	Putative uncharacterized protein OS=Oryza sativa subsp. indica GN=OsI_15692 PE=4 SV=1 - [B8AT93_ORYSI]	14.86	1					0.969144	7.07154	0.950763	8.91423	1.11504	8.24841	1.02166	4.95858	0.992479	7.8359	1.03363	3.15723	7.77897	4.66553
Q259G4	Phosphomannomutase OS=Oryza sativa subsp. indica GN=PMM PE=3 SV=1 - [PMM_ORYSI]	20.97	4	catalytic activity	cytoplasm	metabolic process; response to stimulus	Pf03332; Pf08282	1.02787	8.73398	0.967067	14.1074	1.12525	22.2942	0.970851	8.44351	0.836231	19.2797	0.844873	8.68558	28.1751	5.8335
Q5VM91	Os06g0158000 protein OS=Oryza sativa subsp. japonica GN=P0046E09.33 PE=4 SV=1 - [Q5VM91_ORYSJ]	9.59	6	catalytic activity		metabolic process	Pf00501	0.936541	4.57089	0.893667	15.9998	0.865406	9.69048	0.942816	10.6205	0.944219	6.77641	0.937964	15.4012	68.485	6.40479
Q5N760	Os01g0814900 protein OS=Oryza sativa subsp. japonica GN=OSJNBa0085D07.31 PE=2 SV=1 - [Q5N760_ORYSJ]	14.7	4	catalytic activity	cytoplasm; endoplasmic reticulum; membrane	metabolic process	Pf00175; Pf00970	0.989284	6.24017	0.975053	16.4607	0.962371	11.0228	1.01166	6.12574	1.00369	6.0823	0.967855	9.16668	31.004	8.70459
Q6ZJJ1	Probable L-ascorbate peroxidase 4 OS=Oryza sativa subsp. japonica GN=APX4 PE=2 SV=1 - [APX4_ORYSJ]	11	2	antioxidant activity; catalytic activity; metal ion binding	cytoplasm; membrane; mitochondrion; vacuole	metabolic process; response to stimulus	Pf00141	0.878135	9.701	0.783859	9.66558	0.823129	8.94795	1.00136	11.2904	1.04604	10.24	1.0332	5.70706	31.7184	7.97217
Q6ZFV7	Os08g0546700 protein OS=Oryza sativa subsp. japonica GN=OJ1323_A06.27 PE=2 SV=1 - [Q6ZFV7_ORYSJ]	10.22	2	catalytic activity	membrane	metabolic process	Pf01694	0.816581	22.4911	0.817524	23.2272	0.805939	4.7731	1.04016	3.84633	1.05467	10.175	0.99007	16.1377	35.9047	8.60205
Q0DBY0	Os06g0508700 protein OS=Oryza sativa subsp. japonica GN=Os06g0508700 PE=4 SV=2 - [Q0DBY0_ORYSJ]	6.19	4	catalytic activity; nucleotide binding; RNA binding	cytoplasm; membrane	metabolic process; response to stimulus	Pf01588; Pf09334	1.08688	5.92976	1.06576	10.3473	1.09565	16.5537	0.966614	4.24709	0.885903	13.0549	0.886484	11.4163	81.4159	6.56592
A2YKY4	Putative uncharacterized protein OS=Oryza sativa subsp. indica GN=OsI_25875 PE=3 SV=1 - [A2YKY4_ORYSI]	3.33	3	catalytic activity		metabolic process	Pf00331; Pf02018; Pf11790	0.977501	3.78706	0.943815	3.24547	0.976969	3.06766	0.99453	4.96266	0.996631	6.7777	1.02632	7.00368	121.336	6.78564
Q6Z1N4	Type 1 membrane protein-like OS=Oryza sativa subsp. japonica GN=OSJNBa0044E16.36 PE=4 SV=1 - [Q6Z1N4_ORYSJ]	2.45	1		cytoplasm			0.867086	8.48026	0.777802	5.01505	0.81269	5.0872	1.0761	12.2242	1.06881	14.5916	1.0406	11.8923	39.1246	5.42725
Q2R678	Expressed protein OS=Oryza sativa subsp. japonica GN=Os11g0414000 PE=2 SV=1 - [Q2R678_ORYSJ]	10.44	4	protein binding	membrane	metabolic process	Pf02020	1.09593	7.37928	1.07122	7.32424	1.07855	4.90607	0.925956	9.9274	0.911651	8.49139	0.90446	6.31541	47.2798	5.45264
B8AWK5	Putative uncharacterized protein OS=Oryza sativa subsp. indica GN=OsI_19436 PE=4 SV=1 - [B8AWK5_ORYSI]	9.4	4	protein binding				1.06888	10.6613	1.14614	13.8526	1.01383	9.21384	1.09014	8.45976	0.96246	9.32894	1.02794	9.62823	51.0999	7.1958
Q65XG9	Os05g0379500 protein OS=Oryza sativa subsp. japonica GN=OJ1126_B11.11 PE=2 SV=1 - [Q65XG9_ORYSJ]	8.1	9	nucleotide binding		defense response; response to stimulus	Pf00931	0.961181	11.265	0.931114	16.2446	0.941316	14.6797	0.976164	8.92814	0.991172	8.21912	0.989092	13.5342	142.832	7.18115
Q94CS9	Probable aquaporin TIP1-2 OS=Oryza sativa subsp. japonica GN=TIP1-2 PE=2 SV=1 - [TIP12_ORYSJ]	6.35	1	transporter activity	cytoplasm; membrane; vacuole	transport	Pf00230	1.08624	3.94605	1.18708	21.4949	1.03423	26.111	1.00881	13.467	0.940181	19.9938	1.01753	7.17485	25.3043	6.02393
A2Z2V9	Putative uncharacterized protein OS=Oryza sativa subsp. indica GN=OsI_31953 PE=1 SV=1 - [A2Z2V9_ORYSI]	12.36	2	catalytic activity	cytoplasm; membrane; proteasome	defense response; metabolic process; response to stimulus	Pf00227	0.988767	10.611	0.990573	24.7038	1.00325	8.7921	0.948663	5.87617	0.880802	8.05468	0.900596	21.5097	19.598	8.22119
A3C0D8	Putative uncharacterized protein OS=Oryza sativa subsp. japonica GN=OsJ_29920 PE=4 SV=1 - [A3C0D8_ORYSJ]	3.39	3	catalytic activity; nucleotide binding	cytoplasm	metabolic process; regulation of biological process	Pf00133; Pf01406; Pf08264; Pf09334	1.05909	8.1268	0.986263	11.5578	1.08649	12.6824	0.957954	6.72138	0.917595	1.31196	0.961105	14.4835	116.341	7.1958
A2XC33	Putative uncharacterized protein OS=Oryza sativa subsp. indica GN=OsI_09855 PE=3 SV=1 - [A2XC33_ORYSI]	4.1	1	catalytic activity; nucleotide binding	membrane	metabolic process	Pf00069; Pf07714	0.901962		0.969599		0.848264		0.983072		0.998595		0.903236		42.3851	9.29053
B8A7B9	Serine/threonine-protein kinase OS=Oryza sativa subsp. indica GN=OsI_04702 PE=3 SV=1 - [B8A7B9_ORYSI]	3.16	1	catalytic activity; nucleotide binding; protein binding	cytoplasm; membrane	cell communication; metabolic process; reproduction	Pf00024; Pf00069; Pf00954; Pf01453; Pf07714; Pf08276	1.04278		1.0854		1.03164		1.05719		1.00181		1.04181		90.569	6.45557
A2YU12	Putative uncharacterized protein OS=Oryza sativa subsp. indica GN=OsI_28821 PE=3 SV=1 - [A2YU12_ORYSI]	2.64	1	catalytic activity; nucleotide binding; protein binding	cytoplasm; mitochondrion	metabolic process	Pf00069; Pf07714; Pf08263	0.931159		0.890378		0.906571		1.08136		1.13888		1.0554		93.3059	7.26904
B9FDN8	Putative uncharacterized protein OS=Oryza sativa subsp. japonica GN=OsJ_13807 PE=3 SV=1 - [B9FDN8_ORYSJ]	3.08	1	catalytic activity; nucleotide binding	membrane	metabolic process	Pf00069; Pf01453; Pf07714	1.15872		1.15946		1.18071		0.827658		0.821848		0.808549		65.6226	5.21143
Q69SQ5	Os06g0202900 protein OS=Oryza sativa subsp. japonica GN=OSJNBa0016O19.26 PE=2 SV=1 - [Q69SQ5_ORYSJ]	8.45	1	catalytic activity; nucleotide binding		metabolic process	Pf00069; Pf07714	1.17936	24.462	1.5804	19.9499	1.25116	16.2668	1.22766	10.6377	1.01536	7.59066	1.02289	28.6611	46.7361	8.73389
B8AI85	Putative uncharacterized protein OS=Oryza sativa subsp. indica GN=OsI_05981 PE=3 SV=1 - [B8AI85_ORYSI]	10.27	1	catalytic activity; nucleotide binding		metabolic process	Pf00069; Pf07714	0.939655		0.876177		0.999566		0.949072		0.945284		1.08655		41.2863	7.04932
Q10BD9	Os03g0821900 protein OS=Oryza sativa subsp. japonica GN=Os03g0821900 PE=2 SV=1 - [Q10BD9_ORYSJ]	4.25	1	catalytic activity; nucleotide binding	cytoplasm; membrane; nucleus; organelle lumen	defense response; metabolic process; response to stimulus	Pf00069; Pf07714	1.15026		1.30207		1.23502		0.960844		0.939368		0.949328		46.6526	9.31982
Q5VRF2	Os06g0168800 protein OS=Oryza sativa subsp. japonica GN=OSJNBa0033B09.22 PE=2 SV=1 - [Q5VRF2_ORYSJ]	5.6	1	catalytic activity; nucleotide binding	cytoplasm; mitochondrion	metabolic process	Pf00069; Pf07714	1.00266		1.39234		1.23398		1.02248		0.952216		1.21282		45.4233	9.5542
Q6K1W6	Os09g0258600 protein OS=Oryza sativa subsp. japonica GN=B1279D09.8 PE=1 SV=1 - [Q6K1W6_ORYSJ]	28.07	3	structural molecule activity	cytoplasm; cytosol; membrane; nucleus; organelle lumen; ribosome; vacuole	metabolic process	Pf00237	0.947932	8.39095	1.02589	31.8126	0.972393	29.4966	0.960205	12.2152	1.05437	12.2834	1.08649	16.2324	19.4833	10.3306
B8A8U7	Putative uncharacterized protein OS=Oryza sativa subsp. indica GN=OsI_05032 PE=4 SV=1 - [B8A8U7_ORYSI]	5.63	2		membrane			1.19152	8.74599	1.34566	33.5488	1.22552	28.5716	1.13562	19.9724	0.907219	23.9528	0.991839	19.2479	49.083	5.97314
Q94JA2	Malate dehydrogenase OS=Oryza sativa subsp. japonica GN=P0047B08.9 PE=2 SV=1 - [Q94JA2_ORYSJ]	8.24	4	catalytic activity; metal ion binding; nucleotide binding	cytoplasm; extracellular; membrane; mitochondrion	defense response; metabolic process; response to stimulus	Pf00056; Pf01073; Pf02056; Pf02866	0.827195	10.0515	0.815278	17.9623	0.768534	28.7346	1.14193	19.0327	1.10276	17.4774	1.1065	9.316	35.4386	8.55811
Q69SG8	Os09g0533600 protein OS=Oryza sativa subsp. japonica GN=OJ1112_E07.14 PE=2 SV=1 - [Q69SG8_ORYSJ]	20.69	5	catalytic activity; nucleotide binding	cytoplasm; membrane	metabolic process	Pf00069; Pf07714	1.04305	11.0185	1.24339	12.618	1.05368	12.2693	1.00465	19.2467	1.00481	4.48388	1.07741	9.93786	44.6841	9.70068
A6N0A1	60S ribosomal protein l28 (Fragment) OS=Oryza sativa subsp. indica PE=2 SV=1 - [A6N0A1_ORYSI]	41.22	1	structural molecule activity	cytoplasm; cytosol; membrane; ribosome	metabolic process	Pf01778	1.18259		1.05526		0.989181		1.05784		1.56453		1.23544		14.687	10.4624
Q2R8V6	Dirigent-like protein, expressed OS=Oryza sativa subsp. japonica GN=Os11g0215100 PE=2 SV=1 - [Q2R8V6_ORYSJ]	24.31	4		cytoplasm	response to stimulus	Pf03018	1.0274	9.86862	1.03147	10.6698	1.09025	6.88282	0.926333	6.58343	0.985505	8.41794	0.933569	8.24053	18.4325	6.53662
B9G6R6	Putative uncharacterized protein OS=Oryza sativa subsp. japonica GN=OsJ_32273 PE=3 SV=1 - [B9G6R6_ORYSJ]	4.22	2	catalytic activity; nucleotide binding	membrane	metabolic process	Pf00069; Pf07714; Pf12819	0.940071	3.80199	0.91113	10.854	0.886727	10.8081	0.983902	4.0525	1.01379	9.80385	1.00558	22.2117	89.4202	6.25244
Q10HX0	MATE efflux family protein, expressed OS=Oryza sativa subsp. japonica GN=LOC_Os03g37640 PE=4 SV=1 - [Q10HX0_ORYSJ]	5.45	2	transporter activity	membrane	response to stimulus; transport	Pf01554	1.03064	13.4207	1.00838	37.9155	0.978392	24.7569	1.02361	6.23026	0.978905	0.0852676	1.01624	12.3498	52.7185	7.26904
C8TEV8	Putative sucrose-phosphate synthase OS=Oryza sativa subsp. indica GN=K0031E03.46 PE=4 SV=1 - [C8TEV8_ORYSI]	6.29	6	catalytic activity	membrane	metabolic process	Pf00534; Pf00862; Pf05116	1.10168	12.3289	1.074	19.2913	1.1186	20.6727	0.973514	11.1757	0.916609	12.1661	0.975901	17.8035	118.704	6.44287
A2ZQ91	Putative uncharacterized protein OS=Oryza sativa subsp. japonica GN=OsJ_00732 PE=4 SV=1 - [A2ZQ91_ORYSJ]	8.93	1		cytoplasm; membrane			0.953974	7.10481	0.82521	18.0256	1.05019	11.4707	0.950665	16.7428	1.01053	18.377	0.926733	19.2898	45.7572	9.45166
Q6YSB2	Putative glutamate decarboxylase OS=Oryza sativa subsp. japonica GN=P0104B02.16-2 PE=2 SV=1 - [Q6YSB2_ORYSJ]	8.05	2	catalytic activity		metabolic process	Pf00282	1.18006	8.34544	1.35268	22.4695	1.44909	21.7433	0.86726	13.7418	0.840086	3.72017	1.05623	30.105	56.1606	5.60498
Q0DHB5	Os05g0477900 protein OS=Oryza sativa subsp. japonica GN=Os05g0477900 PE=4 SV=1 - [Q0DHB5_ORYSJ]	10.85	1			transport	Pf00234	0.942895	10.0422	1.09656	8.07006	1.15714	16.0696	0.864614	4.04094	0.858309	0.350338	0.976633	18.7451	12.6596	9.37842
Q9FTG9	Os01g0615300 protein OS=Oryza sativa subsp. japonica GN=P0410E01.47 PE=4 SV=1 - [Q9FTG9_ORYSJ]	19.58	6	catalytic activity	cytoplasm		Pf02458	1.09617	7.7392	1.20082	10.3124	1.12894	8.38473	1.01071	11.3172	0.935612	9.07712	0.975371	8.48231	45.6763	5.24951
B8ANH1	Putative uncharacterized protein OS=Oryza sativa subsp. indica GN=OsI_11399 PE=4 SV=1 - [B8ANH1_ORYSI]	2.85	5	enzyme regulator activity; nucleotide binding; protein binding	cytoplasm; cytosol; endoplasmic reticulum; membrane; nucleus	transport	Pf06920	0.932445	7.50385	0.896755	8.28876	0.929114	7.20894	1.00039	10.1553	1.02181	6.89777	1.03298	7.06472	197.985	6.11279
A2Y3B5	Guanine nucleotide-binding protein alpha-1 subunit OS=Oryza sativa subsp. indica GN=GPA1 PE=2 SV=2 - [GPA1_ORYSI]	13.68	5	enzyme regulator activity; metal ion binding; nucleotide binding; protein binding; signal transducer activity	cytoplasm; endoplasmic reticulum; membrane	cell communication; cell death; cell organization and biogenesis; cell proliferation; development; metabolic process; regulation of biological process; response to stimulus	Pf00025; Pf00503	0.926743	8.39319	0.861341	8.59628	0.865453	6.50669	0.99037	8.3492	1.00755	5.48484	0.959259	18.1981	44.1787	7.09326
B8BFK2	Putative uncharacterized protein OS=Oryza sativa subsp. indica GN=OsI_32536 PE=4 SV=1 - [B8BFK2_ORYSI]	2.59	1	transporter activity	membrane	transport	Pf00854	1.06265	17.0464	1.47216	16.921	1.56338	29.9722	1.82556	110.953	1.14613	8.59238	1.39833	28.9992	101.041	8.17725
Q0JIQ1	Serine/threonine-protein kinase OS=Oryza sativa subsp. japonica GN=Os01g0784700 PE=4 SV=1 - [Q0JIQ1_ORYSJ]	5.75	1	catalytic activity; nucleotide binding; protein binding	cytoplasm; cytosol; membrane; nucleus; vacuole	cell communication; metabolic process; reproduction	Pf00069; Pf00954; Pf01453; Pf01636; Pf07714; Pf08276; Pf11883	1.01935		0.831902		0.902609		0.830304		0.857766		0.821773		90.5465	6.69775
Q10NQ2	Vacuolar sorting protein 9 domain containing protein, expressed OS=Oryza sativa subsp. japonica GN=LOC_Os03g15650 PE=2 SV=1 - [Q10NQ2_ORYSJ]	8.7	2	enzyme regulator activity	cytoplasm; cytosol; membrane; mitochondrion; nucleus	cell division; cell organization and biogenesis; development	Pf02204	0.854414	35.7735	1.03382	14.6588	1.14921	27.1014	0.853167	5.39875	0.974872	1.98343	0.992279	2.13711	31.1082	4.75439
Q688M9	'putative endo-1,3;1,4-beta-D-glucanase' OS=Oryza sativa subsp. japonica GN=P0605G01.10 PE=2 SV=1 - [Q688M9_ORYSJ]	11.67	3	catalytic activity	cytoplasm; extracellular; membrane; nucleus	response to stimulus	Pf01738; Pf12695; Pf12697	1.03474	3.31229	0.979381	6.64057	0.984726	6.92257	0.896226	7.10796	0.839483	9.54803	0.836408	10.364	25.7531	5.8335
Q9MAX5	Coatomer subunit zeta-1 OS=Oryza sativa subsp. japonica GN=COPZ1 PE=2 SV=1 - [COPZ1_ORYSJ]	5.65	1		cytoplasm; Golgi; membrane	transport	Pf01217	0.959362	0.795228	1.03034	6.39577	1.00415	2.60199	1.08492	3.27612	1.21374	2.13208	1.02115	4.97317	19.3571	4.729
B7F3Z8	cDNA clone:J013116H24, full insert sequence OS=Oryza sativa subsp. japonica PE=2 SV=1 - [B7F3Z8_ORYSJ]	4.96	1	metal ion binding	cytoplasm		Pf00642	1.20898		1.5816		1.7127		0.957755		0.767742		1.0817		48.9091	8.1333
Q5TKP2	Putative 60S ribosomal L28 protein OS=Oryza sativa subsp. japonica GN=OJ1362_G11.15 PE=2 SV=1 - [Q5TKP2_ORYSJ]	40.6	1	structural molecule activity	cytoplasm; ribosome	metabolic process	Pf01778	0.948859	5.02927	0.86442	6.84924	0.858439	3.93884	1.05934	0.123544	1.05179	1.72238	1.0856	6.89303	14.875	10.0376
Q01HW9	B0616E02-H0507E05.3 protein OS=Oryza sativa GN=B0616E02-H0507E05.3 PE=4 SV=1 - [Q01HW9_ORYSA]	5.14	2		membrane			1.08577	0.437479	1.09359	2.34682	1.04763	4.08051	0.83712	2.67304	0.885596	1.6996	0.837907	13.5657	50.2657	8.82178
Q7XR60	Methylthioribose kinase 2 OS=Oryza sativa subsp. japonica GN=MTK2 PE=2 SV=1 - [MTK2_ORYSJ]	14.52	1	catalytic activity; nucleotide binding		metabolic process	Pf01633; Pf01636	1.29965		1.21303		1.17748		0.8562		0.818173		0.741295		48.1974	6.65381
Q8LR62	Os01g0933900 protein OS=Oryza sativa subsp. japonica GN=P0423A12.29 PE=2 SV=1 - [Q8LR62_ORYSJ]	20.81	4	catalytic activity; protein binding			Pf00043; Pf02798	1.03011	7.85887	0.966645	9.46672	1.01175	15.3549	0.833616	10.0303	0.922947	5.06987	0.929973	15.6843	24.0676	6.72705
A2WRG5	Putative uncharacterized protein OS=Oryza sativa subsp. indica GN=OsI_02449 PE=4 SV=1 - [A2WRG5_ORYSI]	8.28	3		cytoplasm; membrane; mitochondrion		Pf03140	0.986184	5.04798	0.975916	9.3649	0.943574	9.12915	0.9442	2.17948	0.95624	0.969135	0.838457	8.18182	48.981	6.62451
B8ALL8	Asparagine synthetase OS=Oryza sativa subsp. indica GN=OsI_11112 PE=4 SV=1 - [B8ALL8_ORYSI]	7.63	4	catalytic activity; nucleotide binding		metabolic process	Pf00310; Pf00733	0.682217	19.6631	0.63943	20.6355	0.590386	26.9077	1.29981	5.72461	1.44376	4.45699	1.36491	5.22738	65.6996	6.20166
Q8GSE8	Os07g0162500 protein OS=Oryza sativa subsp. japonica GN=OJ1714_H10.152 PE=2 SV=1 - [Q8GSE8_ORYSJ]	16.46	5	catalytic activity		metabolic process	Pf00135; Pf07859; Pf12697	1.16494	12.0354	1.21627	23.4612	1.34913	23.8878	0.946483	18.0805	0.906735	9.67356	1.01702	17.4308	35.0398	5.64307
Q0JDT2	Os04g0379600 protein OS=Oryza sativa subsp. japonica GN=Os04g0379600 PE=4 SV=1 - [Q0JDT2_ORYSJ]	4.91	1		cytoplasm		Pf05627	1.04565	8.8002	1.28459	24.955	1.1912	3.21503	0.967366	4.40572	0.996733	19.8424	1.02149	12.8026	24.6909	9.67139
Q10MT2	Eukaryotic translation initiation factor 2 alpha subunit family protein, expressed OS=Oryza sativa subsp. japonica GN=Os03g0296400 PE=2 SV=1 - [Q10MT2_ORYSJ]	20.35	7	RNA binding	cytoplasm; nucleus	metabolic process	Pf07541	0.999873	8.16125	0.972305	4.55354	0.919662	3.98034	0.971464	9.41381	0.900349	15.4816	0.934745	4.01841	38.2106	5.38916
Q7XBZ9	Dynamin-related protein 1C, putative, expressed OS=Oryza sativa subsp. japonica GN=OSJNBa0057L21.1 PE=2 SV=1 - [Q7XBZ9_ORYSJ]	14.4	3	catalytic activity; nucleotide binding	cytoplasm; membrane; mitochondrion; vacuole	defense response; metabolic process; response to stimulus	Pf00350; Pf01031; Pf02212	0.977521	4.91265	1.08752	19.1781	0.97103	8.87125	1.04271	0.515658	1.03114	6.49342	1.00386	2.39097	69.3381	7.60596
Q8RUI4	NAC transcription factor OS=Oryza sativa subsp. japonica GN=P0504E02.33 PE=2 SV=1 - [Q8RUI4_ORYSJ]	15.35	2	protein binding			Pf01849	0.928924	31.4853	0.858301	0.97803	0.936031	14.3043	0.895546	1.1608	0.920248	7.92749	0.867254	8.07766	22.0789	4.55127
Q5ZCK5	Probable calcium-binding protein CML16 OS=Oryza sativa subsp. japonica GN=CML16 PE=2 SV=1 - [CML16_ORYSJ]	14.36	2	metal ion binding			Pf00036	1.11471	11.3158	1.02123	9.33172	1.05862	11.6984	0.929381	9.80177	0.985487	15.8649	1.00031	8.01421	19.2511	4.58936
B8AKX6	Peroxisomal (S)-2-hydroxy-acid oxidase GLO1 OS=Oryza sativa subsp. indica GN=GLO1 PE=3 SV=1 - [GLO1_ORYSI]	18.7	4	catalytic activity; nucleotide binding	cytoplasm; cytosol; extracellular; membrane; nucleus; ribosome; vacuole	metabolic process; regulation of biological process; reproduction	Pf00478; Pf00977; Pf01070; Pf01645; Pf03060	1.02823	9.33255	0.850264	6.8063	0.816208	5.45255	0.948688	4.92267	0.948985	7.15743	0.920432	8.79346	40.3581	8.47021
Q259D7	H0801D08.15 protein OS=Oryza sativa GN=H0801D08.15 PE=4 SV=1 - [Q259D7_ORYSA]	14.73	3		cytoplasm; cytosol; membrane; nucleus	metabolic process	Pf00310; Pf12481; Pf12504	0.887422	19.1945	0.974574	17.7715	0.917788	13.8814	1.32523	17.2678	1.13076	12.0468	1.14663	10.0867	27.7726	6.52197
Q8H386	Casein kinase II alpha subunit OS=Oryza sativa subsp. japonica GN=OJ1513_F02.134 PE=4 SV=1 - [Q8H386_ORYSJ]	8.41	2	catalytic activity; nucleotide binding	membrane	metabolic process	Pf00069; Pf01636; Pf07714	0.920848	5.75485	0.896485	5.60229	0.873675	10.1721	1.00902	14.8531	1.04843	7.70701	0.985826	10.0047	39.3173	8.47021
C7IWI9	Os01g0662200 protein (Fragment) OS=Oryza sativa subsp. japonica GN=Os01g0662200 PE=4 SV=1 - [C7IWI9_ORYSJ]	10.76	2	structural molecule activity	cytoplasm; ribosome	metabolic process	Pf00542	0.890389	3.60542	0.864078	5.19543	0.837333	3.35129	1.10562	6.43275	1.11577	10.0712	1.04323	12.0099	16.3178	5.40186
Q0D673	Probable protein phosphatase 2C 62 OS=Oryza sativa subsp. japonica GN=Os07g0507000 PE=2 SV=1 - [P2C62_ORYSJ]	18.97	5	catalytic activity; metal ion binding		metabolic process	Pf00481	1.12132	15.5016	1.039	26.4087	1.1491	37.6787	0.968264	14.1025	0.931355	14.9887	0.942283	20.5208	31.7213	6.96143
B8AGR5	Putative uncharacterized protein OS=Oryza sativa subsp. indica GN=OsI_08509 PE=3 SV=1 - [B8AGR5_ORYSI]	14.03	8	catalytic activity; nucleotide binding	cytoplasm; membrane	metabolic process; response to stimulus	Pf00152; Pf01336	0.994757	9.35801	0.934317	8.49503	0.971383	15.8916	0.947978	16.8087	0.981945	8.46416	0.944367	11.4705	60.8101	6.31592
Q84NP4	Putative uncharacterized protein P0034A04.133 OS=Oryza sativa subsp. japonica GN=P0034A04.133 PE=4 SV=1 - [Q84NP4_ORYSJ]	1.49	1	protein binding	membrane	transport	Pf00957	1.07303	17.8632	0.961818	1.09733	0.880787	9.76147	0.882127	1.86791	0.931611	19.0527	0.875409	9.33267	117.362	5.59229
P0C5D4	Putative peroxiredoxin Q, chloroplastic OS=Oryza sativa subsp. indica GN=OsI_22010 PE=1 SV=1 - [PRXQ_ORYSI]	11.06	2	antioxidant activity; catalytic activity	cytoplasm	metabolic process	Pf00578; Pf08534	0.980803	16.5146	1.05696	17.4501	0.945272	3.37401	0.988646	17.888	0.891426	19.3188	0.924227	6.8142	23.7224	9.90576
Q6ZAX5	Os08g0269700 protein OS=Oryza sativa subsp. japonica GN=OJ1540_G08.29 PE=2 SV=1 - [Q6ZAX5_ORYSJ]	21.32	1					1.07783	24.5245	1.44609	33.7323	1.1099	12.5576	1.10562	22.1093	1.15001	30.0633	1.00635	21.0465	14.1795	10.4917
B8AYJ5	Putative uncharacterized protein OS=Oryza sativa subsp. indica GN=OsI_20075 PE=4 SV=1 - [B8AYJ5_ORYSI]	6.33	3		cytoplasm; endoplasmic reticulum; membrane		Pf07946	0.91109	9.87718	0.88279	13.4632	0.908753	9.90302	1.02205	12.2447	1.04027	5.40836	1.01809	6.22628	53.8926	6.01123
A6N0H8	Abscisic stress ripening protein 2 (Fragment) OS=Oryza sativa subsp. indica PE=2 SV=1 - [A6N0H8_ORYSI]	15.32	2			response to stimulus		1.10411	5.59668	1.3486	12.1016	1.02381	25.831	0.942315	10.8678	0.861072	10.9303	0.912563	6.91067	12.3221	6.80029
A2Z057	Putative uncharacterized protein OS=Oryza sativa subsp. indica GN=OsI_30986 PE=4 SV=1 - [A2Z057_ORYSI]	3.99	2		cytoplasm; endoplasmic reticulum; membrane			1.1062	26.2144	1.34881	25.9471	1.10222	7.69811	1.04056	12.6058	0.882981	16.7595	1.09773	0.815284	70.1236	8.88037
Q10RX0	Cysteinyl-tRNA synthetase, putative, expressed OS=Oryza sativa subsp. japonica GN=LOC_Os03g04960 PE=3 SV=1 - [Q10RX0_ORYSJ]	6.51	2	catalytic activity; metal ion binding; nucleotide binding	cytoplasm	metabolic process	Pf00133; Pf01406; Pf01921; Pf09334	1.03882	8.10351	0.996095	17.8369	1.08028	12.9295	0.909252	4.11161	0.916353	9.20519	0.921015	5.74354	38.9493	6.62451
B5UBC0	NBS-LRR class disease resistance protein OS=Oryza sativa subsp. japonica GN=Pikm2-TS PE=2 SV=1 - [B5UBC0_ORYSJ]	5.09	5	nucleotide binding	membrane	defense response; response to stimulus	Pf00931	0.977111	8.26027	0.992772	11.1129	0.939487	4.58906	1.00217	7.53209	1.07151	3.23762	1.03078	3.31408	114.5	8.39697
Q8RU06	Cellulase containing protein, expressed OS=Oryza sativa subsp. japonica GN=OJ1208D02.5 PE=2 SV=1 - [Q8RU06_ORYSJ]	7.65	4	catalytic activity		metabolic process	Pf00150	0.979049	5.64944	0.943353	10.905	1.03693	3.6143	0.985544	6.62596	1.03245	7.54642	1.0416	4.87945	56.3642	5.61768
B9GBA5	Putative uncharacterized protein OS=Oryza sativa subsp. japonica GN=OsJ_34325 PE=4 SV=1 - [B9GBA5_ORYSJ]	4.73	1	catalytic activity; protein binding		metabolic process	Pf00443; Pf00917	1.07664		1.02656		1.18858		1.00036		1.02675		0.921879		133.956	6.01123
Q84SG9	Serine/threonine kinase receptor-like protein OS=Oryza sativa subsp. japonica GN=OJ1058_A12.139 PE=4 SV=1 - [Q84SG9_ORYSJ]	7.85	2	catalytic activity; nucleotide binding	cytoplasm	metabolic process	Pf00069; Pf01657; Pf07714	0.813304	4.6669	0.713829	3.55233	0.678782	20.279	1.04393	2.82698	1.05963	3.1643	1.05228	6.05606	66.6322	6.27783
A2YXF9	Putative uncharacterized protein OS=Oryza sativa subsp. indica GN=OsI_30023 PE=4 SV=1 - [A2YXF9_ORYSI]	5.88	4		cytoplasm; membrane; mitochondrion; vacuole		Pf06813	0.918353	2.55978	0.797894	18.1079	0.77744	13.1686	0.973621	9.91775	1.00667	15.5157	0.976466	8.83307	64.1525	7.53271
Q6ZJ22	Os08g0556400 protein OS=Oryza sativa subsp. japonica GN=OJ1150_A11.12-1 PE=2 SV=1 - [Q6ZJ22_ORYSJ]	5.74	1	metal ion binding	cytoplasm; membrane		Pf01529	0.977694		1.24248		1.3928		1.07076		1.0362		1.0954		74.1345	8.55811
B9FKZ6	Serine/threonine-protein kinase OS=Oryza sativa subsp. japonica GN=OsJ_19099 PE=4 SV=1 - [B9FKZ6_ORYSJ]	7.29	2	catalytic activity; nucleotide binding; protein binding	cytoplasm; cytosol; membrane; nucleus; vacuole	cell communication; metabolic process; reproduction	Pf00069; Pf00954; Pf01453; Pf07714; Pf08276; Pf11883	0.998557	4.28761	0.904953	10.8303	0.903385	8.95723	0.990959	18.5186	0.938315	2.01	0.97258	4.2451	90.8282	6.49365
A2ZJC1	Putative uncharacterized protein OS=Oryza sativa subsp. indica GN=OsI_37921 PE=4 SV=1 - [A2ZJC1_ORYSI]	2.6	2		cytoplasm; mitochondrion			1.58188	4.40729	2.0846	23.6653	1.82155	4.63906	0.871311	73.839	0.789129	8.55256	1.11214	56.0352	114.306	5.98584
B8B402	Putative uncharacterized protein OS=Oryza sativa subsp. indica GN=OsI_22171 PE=3 SV=1 - [B8B402_ORYSI]	4.98	5	catalytic activity; motor activity; nucleotide binding; protein binding	cytoplasm; cytoskeleton; cytosol; membrane	cell organization and biogenesis; cellular component movement	Pf00225; Pf05557	1.06973	8.69738	1.05258	10.1937	1.10471	16.4645	0.953583	6.5528	1.02728	6.50053	1.07086	11.4679	144.352	6.55127
B8ADJ1	Ubiquitin carboxyl-terminal hydrolase OS=Oryza sativa subsp. indica GN=OsI_00623 PE=3 SV=1 - [B8ADJ1_ORYSI]	4.41	3	catalytic activity; metal ion binding; protein binding		cell differentiation; cell growth; development; metabolic process; reproduction	Pf00443; Pf00627; Pf02148	1.13683	21.4663	1.0757	5.94696	1.19098	24.4821	0.981485	12.9593	0.89464	12.76	0.927141	8.01778	88.5007	5.31299
A2XEK9	Putative uncharacterized protein OS=Oryza sativa subsp. indica GN=OsI_10767 PE=4 SV=1 - [A2XEK9_ORYSI]	10.71	4	metal ion binding				1.14009	18.8481	0.987221	2.51569	1.02235	17.6054	0.841256	5.76474	0.88004	1.06845	0.843993	8.88478	42.798	4.93213
Q6ZIF9	Metal-dependent hydrolase-like protein OS=Oryza sativa subsp. japonica GN=OJ1115_B01.33 PE=4 SV=1 - [Q6ZIF9_ORYSJ]	16.42	4	catalytic activity	cytoplasm	response to stimulus	Pf04199	0.954059	5.35979	1.04267	6.98638	0.945975	8.69812	1.0754	5.13948	1.07856	7.62329	1.01474	7.50344	29.3752	6.68311
Q0DW19	Os03g0101600 protein OS=Oryza sativa subsp. japonica GN=Os03g0101600 PE=4 SV=1 - [Q0DW19_ORYSJ]	12.2	4	catalytic activity; metal ion binding; nucleotide binding		cell differentiation; metabolic process; response to stimulus	Pf00107; Pf08240	1.09674	25.6424	1.13401	17.4162	0.977612	27.924	1.01255	37.4541	0.792559	5.08535	0.900916	19.0801	34.7851	7.23975
P0C438	50S ribosomal protein L14, chloroplastic OS=Oryza sativa GN=rpl14 PE=3 SV=1 - [RK14_ORYSA]	17.07	1	RNA binding; structural molecule activity	cytoplasm; ribosome	metabolic process	Pf00238	0.784679		0.844058		0.816871		0.918695		0.816894		0.91054		13.5563	8.29443
A2WQX7	Putative uncharacterized protein OS=Oryza sativa subsp. indica GN=OsI_02260 PE=4 SV=1 - [A2WQX7_ORYSI]	14.58	5	catalytic activity; nucleotide binding	membrane	metabolic process	Pf01073; Pf01370; Pf02719; Pf05368; Pf07993	0.987733	7.40091	0.912543	7.11123	0.973887	4.22272	0.924998	4.62402	0.995903	3.70698	0.917936	8.05963	36.8549	6.72705
Q6F331	Os05g0490100 protein OS=Oryza sativa subsp. japonica GN=OSJNBa0088I06.1 PE=4 SV=1 - [Q6F331_ORYSJ]	42.86	2	structural molecule activity	cytoplasm; ribosome	metabolic process	Pf01248	0.89095	8.66337	0.913742	24.755	0.978843	14.192	0.988232	21.9981	1.03506	8.80139	0.966049	7.7785	12.3525	9.5542
Q7XZX4	40S ribosomal protein S29, putative, expressed OS=Oryza sativa subsp. japonica GN=OSJNBb0094O03.12 PE=4 SV=1 - [Q7XZX4_ORYSJ]	17.86	1	structural molecule activity	cytoplasm; cytosol; ribosome	metabolic process	Pf00253	0.898876	3.3103	1.02705	8.01641	0.921456	16.1026	1.08064	1.37962	1.0955	10.1712	1.05674	6.35403	6.41011	9.90576
Q6F321	Proteasome subunit alpha type OS=Oryza sativa subsp. japonica GN=OSJNBa0088I06.6 PE=2 SV=1 - [Q6F321_ORYSJ]	32.93	3	catalytic activity	cytoplasm; extracellular; membrane; nucleus; proteasome; vacuole	metabolic process; response to stimulus	Pf00227; Pf10584	1.19818	7.35598	1.41484	30.1713	1.33648	9.99658	1.09216	6.85355	0.926258	20.322	1.07392	9.48108	27.2028	6.0874
B9GC26	Putative uncharacterized protein OS=Oryza sativa subsp. japonica GN=OsJ_35362 PE=4 SV=1 - [B9GC26_ORYSJ]	6.61	3	catalytic activity	membrane		Pf01425	0.890222	3.91525	0.822656	3.1628	0.844008	8.01301	1.00969	3.18455	0.986658	2.01693	0.956687	5.57106	53.4696	7.04932
A2WNF5	Putative uncharacterized protein OS=Oryza sativa subsp. indica GN=OsI_01383 PE=4 SV=1 - [A2WNF5_ORYSI]	9.28	4	protein binding	cytoplasm	defense response; response to stimulus	Pf07915; Pf12999	0.96877	18.0851	1.19831	23.0811	1.12604	27.5117	1.07507	12.0586	1.00085	6.06235	1.24927	22.2522	69.3048	4.85596
A2ZHW7	Putative uncharacterized protein OS=Oryza sativa subsp. indica GN=OsI_37404 PE=3 SV=1 - [A2ZHW7_ORYSI]	2.27	1	catalytic activity; metal ion binding; nucleotide binding; protein binding; transporter activity	membrane	metabolic process; transport	Pf00122; Pf00689; Pf00690; Pf00702; Pf12515; Pf12710	0.957788	9.59251	1.12378	7.66328	1.33603	9.08149	1.00803	0.48385	1.03639	10.5078	1.26462	5.66106	101.097	7.02002
B8ACZ5	Putative uncharacterized protein OS=Oryza sativa subsp. indica GN=OsI_00169 PE=4 SV=1 - [B8ACZ5_ORYSI]	7	6	protein binding; RNA binding	cytoplasm; membrane; mitochondrion	metabolic process	Pf01399; Pf02463; Pf09731	0.947885	9.72674	0.929566	21.1005	0.937484	8.3953	0.960717	5.6974	0.991527	14.2654	0.964557	5.77131	113.799	9.33447
Q6ZEZ1	Putative ribose-5-phosphate isomerase OS=Oryza sativa subsp. japonica GN=P0534H07.29-2 PE=3 SV=1 - [Q6ZEZ1_ORYSJ]	12.79	2	catalytic activity	cytoplasm; membrane	defense response; metabolic process; response to stimulus	Pf06026	0.857849	6.83016	0.769033	10.1607	0.861599	4.15545	0.969982	3.87625	1.00029	3.26449	0.933743	4.36751	26.9561	5.05908
Q6ZGP5	Os02g0753300 protein OS=Oryza sativa subsp. japonica GN=OJ1288_G09.19 PE=2 SV=1 - [Q6ZGP5_ORYSJ]	10.88	1	protein binding			Pf01477; Pf06232	0.807936	16.7666	0.824508	11.8299	0.882958	19.7947	1.10227	4.81905	1.18747	12.9183	1.10272	5.52291	19.9728	6.66846
B8A797	Putative uncharacterized protein OS=Oryza sativa subsp. indica GN=OsI_03230 PE=3 SV=1 - [B8A797_ORYSI]	26.76	3	catalytic activity; nucleotide binding	membrane	cell differentiation; development; metabolic process; response to stimulus	Pf00179	0.952914	6.81243	0.988218	8.1934	1.00277	12.3108	1.0107	1.90242	0.978009	4.90411	0.976955	2.97492	15.8862	5.5542
Q69NC3	Os09g0322000 protein OS=Oryza sativa subsp. japonica GN=OJ1742_G01.36-1 PE=2 SV=1 - [Q69NC3_ORYSJ]	6.23	4	transporter activity	membrane	transport	Pf00083; Pf07690	0.973206	8.16679	0.978698	4.00771	1.01073	8.27924	0.945714	5.98312	0.987814	6.77118	0.967126	7.49571	57.4541	8.76318
Q6L4R9	Os05g0592500 protein OS=Oryza sativa subsp. japonica GN=P0663C08.9 PE=2 SV=1 - [Q6L4R9_ORYSJ]	4.03	2		membrane		Pf04499	0.939397	3.22336	0.966968	12.3798	0.978043	11.3644	0.924908	1.40803	0.992562	7.47172	0.929364	1.7043	85.0748	4.51318
Q2QNQ6	Expressed protein OS=Oryza sativa subsp. japonica GN=LOC_Os12g37060 PE=2 SV=1 - [Q2QNQ6_ORYSJ]	11.21	2		cytoplasm; membrane			0.830379	16.9427	0.779076	3.86643	0.86311	0.741214	1.0098	6.68657	0.917988	14.2679	0.883241	5.80719	23.0139	9.68604
Q6ZD33	Receptor protein kinase PERK1-like protein OS=Oryza sativa subsp. japonica GN=P0665C04.34 PE=4 SV=1 - [Q6ZD33_ORYSJ]	17.17	7	catalytic activity; nucleotide binding	cytoplasm	metabolic process	Pf00069; Pf07714	0.981969	12.6511	0.917407	12.1577	0.899649	17.0743	0.996377	10.7241	1.00768	6.855	0.98692	7.72556	64.0782	5.45264
B8B614	Putative uncharacterized protein OS=Oryza sativa subsp. indica GN=OsI_25906 PE=4 SV=1 - [B8B614_ORYSI]	2.77	1	catalytic activity; metal ion binding; protein binding	cytoplasm; membrane	metabolic process	Pf00097; Pf12678	0.900489	1.43549	1.06157	19.5671	1.05632	24.2699	1.02107	3.86159	1.04048	7.37287	1.0864	1.76183	39.0045	5.94775
Q7XR93	OSJNBa0011L07.8 protein OS=Oryza sativa subsp. japonica GN=OSJNBa0011L07.8 PE=2 SV=2 - [Q7XR93_ORYSJ]	6.23	2	protein binding			Pf00018; Pf07653	0.986508	13.6499	1.00511	19.5746	1.04607	18.9096	0.999083	8.19057	1.04799	13.8933	1.03498	7.84134	41.1937	6.11279
Q7XH16	Os10g0136500 protein OS=Oryza sativa subsp. japonica GN=OSJNBa0087H07.9 PE=2 SV=1 - [Q7XH16_ORYSJ]	4.43	1	catalytic activity; nucleotide binding	cytoplasm	metabolic process	Pf00069; Pf01636; Pf01657; Pf07714; Pf11883	1.18921		1.13856		1.1536		0.721913		0.705331		0.751586		72.4544	5.80811
Q9SDK0	Os01g0256400 protein OS=Oryza sativa subsp. japonica GN=P0711E10.35 PE=2 SV=1 - [Q9SDK0_ORYSJ]	9.23	1		cytoskeleton		Pf01221	0.967436		1.57124		1.17356		0.997978		1.0198		1.11451		14.159	8.14795
A3AHY0	Putative uncharacterized protein OS=Oryza sativa subsp. japonica GN=OsJ_10847 PE=4 SV=1 - [A3AHY0_ORYSJ]	4.45	5	transporter activity		transport	Pf03810; Pf08389; Pf08767	1.1287	2.47357	1.13159	20.3185	1.17867	17.1961	0.933054	1.37828	0.980981	6.23879	1.06249	7.98924	118.707	5.64307
Q6ETS8	Putative mevalonate disphosphate decarboxylase OS=Oryza sativa subsp. japonica GN=P0017C12.29 PE=2 SV=1 - [Q6ETS8_ORYSJ]	9.03	3	catalytic activity; nucleotide binding; protein binding		metabolic process		1.05651	27.2969	1.04888	17.2152	1.08003	27.5813	1.04898	2.05732	1.04939	4.62932	0.993726	7.39012	45.8892	6.45557
A2Y8G4	Putative uncharacterized protein OS=Oryza sativa subsp. indica GN=OsI_21343 PE=4 SV=1 - [A2Y8G4_ORYSI]	8.19	4	nucleotide binding; signal transducer activity	nucleus	cell communication; development; regulation of biological process; response to stimulus	Pf00503	1.00361	19.9673	0.867416	13.9541	0.856596	7.22392	1.00715	45.2786	1.01674	9.91674	1.01831	29.0233	97.8104	5.70654
Q5JQW1	OSJNBb0015D13.18 protein OS=Oryza sativa subsp. japonica PE=4 SV=1 - [Q5JQW1_ORYSJ]	2.99	1	catalytic activity; nucleotide binding; signal transducer activity		cell communication; metabolic process; regulation of biological process; reproduction; response to stimulus	Pf00069; Pf00954; Pf01453; Pf03000; Pf07714; Pf08276	1.11793		1.11139		1.05003		0.81056		0.830975		0.918388		367.598	7.7085
Q657L8	Peptidyl-prolyl cis-trans isomerase OS=Oryza sativa subsp. japonica GN=P0468H06.14-1 PE=2 SV=1 - [Q657L8_ORYSJ]	13.19	8	catalytic activity		metabolic process	Pf00254	1.03729	8.49439	0.975294	11.2858	0.968397	10.5092	0.883425	10.2726	0.935135	9.103	0.910592	11.0645	72.8279	4.99561
Q9LST8	Proteasome subunit beta type OS=Oryza sativa subsp. japonica GN=OsPBB1 PE=2 SV=1 - [Q9LST8_ORYSJ]	6.99	2	catalytic activity	cytoplasm; nucleus; proteasome	metabolic process	Pf00227	0.943973	8.12691	0.950514	4.58617	1.19706	10.5502	0.989089	10.3878	0.926775	7.07886	0.935487	1.2794	28.9786	6.93213
B8AKM5	Putative uncharacterized protein OS=Oryza sativa subsp. indica GN=OsI_10868 PE=4 SV=1 - [B8AKM5_ORYSI]	7.73	7	protein binding	cytoplasm; cytosol; membrane; nucleus		Pf00018	0.947007	6.10519	0.895825	10.9154	0.904936	12.1063	0.991155	9.24769	1.03539	11.1495	0.97029	6.91222	111.065	5.38916
B8AK12	Putative uncharacterized protein OS=Oryza sativa subsp. indica GN=OsI_10738 PE=4 SV=1 - [B8AK12_ORYSI]	3.24	4	enzyme regulator activity	cytoplasm; cytosol; membrane; nucleus	cell communication; development; regulation of biological process; response to stimulus	Pf01369; Pf09324; Pf12783	1.10369	8.63044	1.42245	17.23	1.35482	23.1375	1.12324	14.1137	0.950499	12.376	1.07086	21.2408	197.483	5.71924
B8ABW1	Putative uncharacterized protein OS=Oryza sativa subsp. indica GN=OsI_02873 PE=4 SV=1 - [B8ABW1_ORYSI]	6.49	6	protein binding			Pf00515; Pf07719; Pf12569	1.0017	4.42118	1.00339	21.7016	1.03105	19.0563	0.998435	3.70469	1.00008	8.42277	0.977881	7.61131	103.667	6.46826
B8A885	Putative uncharacterized protein OS=Oryza sativa subsp. indica GN=OsI_01951 PE=3 SV=1 - [B8A885_ORYSI]	7.17	1	protein binding	chromosome; cytoplasm; cytoskeleton; nucleus; organelle lumen	cell organization and biogenesis; development; metabolic process; regulation of biological process; reproduction; response to stimulus	Pf00888; Pf10557	0.956019		0.983191		0.901174		1.20424		1.06157		1.08975		82.9298	7.38623
Q8S1T0	Os01g0835500 protein OS=Oryza sativa subsp. japonica GN=P0506B12.18-1 PE=4 SV=1 - [Q8S1T0_ORYSJ]	10.44	8	antioxidant activity; catalytic activity; metal ion binding	membrane	metabolic process	Pf08022; Pf08030; Pf08414	1.07095	3.23107	1.03412	6.91793	1.05113	11.9887	0.889285	7.43773	0.932374	7.56124	0.913332	10.8385	94.7296	9.31982
A2ZZ12	Putative uncharacterized protein OS=Oryza sativa subsp. japonica GN=OsJ_03885 PE=3 SV=1 - [A2ZZ12_ORYSJ]	10.68	1	catalytic activity; nucleotide binding; protein binding			Pf00179; Pf05773	0.929456	3.1993	0.842535	5.84352	0.931331	3.80324	0.991464	0.521842	0.982976	7.59921	0.937518	8.38881	11.3728	8.45557
B9FVM1	Putative uncharacterized protein OS=Oryza sativa subsp. japonica GN=OsJ_23182 PE=4 SV=1 - [B9FVM1_ORYSJ]	7.37	2	catalytic activity		metabolic process	Pf00135; Pf07859	1.20029	12.3081	1.34265	25.748	1.26846	17.4535	1.04673	5.73158	0.873942	8.64767	1.01439	12.2497	34.1299	5.68115
A6N1L3	Oxygen-evolving enhancer protein 1 (Fragment) OS=Oryza sativa subsp. indica PE=2 SV=1 - [A6N1L3_ORYSI]	9.55	1	catalytic activity; metal ion binding; RNA binding	cytoplasm; extracellular; membrane	cell organization and biogenesis; defense response; metabolic process; regulation of biological process; response to stimulus	Pf01716	0.944667		0.968399		0.807571		1.22384		1.31743		1.36684		18.9897	4.84326
Q5JLS4	Phosphatidate cytidylyltransferase OS=Oryza sativa subsp. japonica GN=B1131G08.14 PE=2 SV=1 - [Q5JLS4_ORYSJ]	5.18	2	catalytic activity	membrane		Pf01148	0.929621	4.81194	0.959993	14.2962	0.912612	11.354	1.01147	3.94456	1.0155	7.76054	0.945132	4.77799	49.1625	9.56885
A2ZUJ9	Putative uncharacterized protein OS=Oryza sativa subsp. japonica GN=OsJ_02285 PE=4 SV=1 - [A2ZUJ9_ORYSJ]	16.6	4		cytoplasm; mitochondrion			0.915121	20.5885	1.0677	36.9277	0.849561	32.0575	1.10079	7.35358	0.991511	19.9532	1.03308	16.7948	28.6254	5.80811
Q7G2B5	Nonspecific lipid-transfer protein 2, putative, expressed OS=Oryza sativa subsp. japonica GN=Os10g0505700 PE=4 SV=1 - [Q7G2B5_ORYSJ]	27.47	2	catalytic activity	cytoplasm	metabolic process; transport	Pf00234	1.123	6.76194	1.30343	17.1066	1.16834	24.3478	1.06785	3.01024	0.960968	4.23179	0.978662	8.11967	9.27555	8.90967
Q9AYT6	50S ribosomal protein L11, chloroplast, putative, expressed OS=Oryza sativa subsp. japonica GN=Os03g0122200 PE=2 SV=1 - [Q9AYT6_ORYSJ]	6.67	1	structural molecule activity	cytoplasm; cytosol; membrane; ribosome	metabolic process	Pf00298; Pf03946	1.00916		0.901984		1.04563		1.03864		0.994282		1.03266		21.9411	9.83252
B8B0Z9	Putative uncharacterized protein OS=Oryza sativa subsp. indica GN=OsI_23984 PE=4 SV=1 - [B8B0Z9_ORYSI]	8.02	6	protein binding	membrane	cell organization and biogenesis	Pf00626; Pf02209	1.02702	3.14671	1.09386	20.0907	1.19567	18.3482	0.947156	4.80445	0.868106	13.2636	0.984107	8.00674	107.597	7.59131
Q8GU64	MRP-like ABC transporter OS=Oryza sativa subsp. japonica GN=mrp8 PE=2 SV=1 - [Q8GU64_ORYSJ]	4.91	6	catalytic activity; nucleotide binding; transporter activity	cytoplasm; membrane; vacuole	metabolic process; response to stimulus; transport	Pf00005; Pf00664	0.909418	8.58068	0.830436	12.2569	0.88274	24.1069	0.959858	6.90334	1.01843	4.86138	1.00071	10.0922	167.533	7.91357
Q10N98	33 kDa secretory protein, putative, expressed OS=Oryza sativa subsp. japonica GN=Os03g0277600 PE=2 SV=1 - [Q10N98_ORYSJ]	5.66	1		cytoplasm	response to stimulus	Pf01657	0.764254	26.5044	0.977561	53.3836	0.958205	41.506	0.832074	25.1028	0.873413	16.5777	1.04701	38.6079	28.1725	8.23584
Q0J0Q8	Os09g0502000 protein OS=Oryza sativa subsp. japonica GN=Os09g0502000 PE=2 SV=1 - [Q0J0Q8_ORYSJ]	28.57	1	structural molecule activity	cytoplasm; cytosol; nucleus; organelle lumen; ribosome	metabolic process	Pf01655	0.97644	5.68829	1.01933	16.2784	0.95147	12.3676	1.04597	12.0074	0.919225	11.7662	0.95242	12.9806	15.6646	10.5063
Q7XVM2	OSJNBa0072K14.5 protein OS=Oryza sativa subsp. japonica GN=OSJNBa0072K14.5 PE=2 SV=1 - [Q7XVM2_ORYSJ]	8.41	3	catalytic activity; metal ion binding	cytoplasm; cytosol; membrane; mitochondrion; ribosome	metabolic process; response to stimulus	Pf00198; Pf00364	0.839342	23.3078	0.75094	13.0829	0.740044	13.7594	1.22252	21.6002	1.13191	10.9038	1.13657	15.9456	48.2532	8.63135
B9F8Z5	Putative uncharacterized protein OS=Oryza sativa subsp. japonica GN=OsJ_11245 PE=4 SV=1 - [B9F8Z5_ORYSJ]	4.59	1	transporter activity	membrane	transport	Pf02535	0.814069	14.1931	0.774301	15.3966	0.804462	28.212	1.01231	3.47284	1.03986	7.92987	1.00931	1.05568	33.2809	6.13818
B8BKX0	Putative uncharacterized protein OS=Oryza sativa subsp. indica GN=OsI_36387 PE=3 SV=1 - [B8BKX0_ORYSI]	10.08	6	catalytic activity; metal ion binding	membrane		Pf00557; Pf01321	1.07986	8.26674	1.14673	17.5212	1.08453	19.98	0.965409	15.9192	0.904206	16.0634	0.938771	8.98182	71.941	5.8335
Q7X914	P0076O17.9 protein OS=Oryza sativa subsp. japonica GN=P0076O17.9 PE=4 SV=1 - [Q7X914_ORYSJ]	7.54	3		cytoplasm; endoplasmic reticulum		Pf05602	1.00687	9.04901	0.938574	10.6418	1.05958	11.5595	0.992914	6.62086	1.06915	5.61675	1.03205	20.3138	68.3531	6.03662
B8ARK5	Putative uncharacterized protein OS=Oryza sativa subsp. indica GN=OsI_15138 PE=4 SV=1 - [B8ARK5_ORYSI]	15.79	3		membrane		Pf03665	0.937142	6.87426	0.846856	19.6343	0.812582	18.267	0.918975	12.2339	0.971403	5.84415	0.930487	10.4176	22.7389	6.91748
Q6Z2X6	Cycloartenol synthase OS=Oryza sativa subsp. japonica GN=Os02g0139700 PE=1 SV=1 - [CAS_ORYSJ]	13.04	9	catalytic activity	cytoplasm; mitochondrion	metabolic process	Pf00432	0.942666	7.89333	0.869605	5.22203	0.916108	12.8431	0.986777	6.24052	1.01356	11.4134	0.990597	5.79755	85.6268	6.50732
Q69XK9	Os06g0601100 protein OS=Oryza sativa subsp. japonica GN=P0486H12.4 PE=2 SV=1 - [Q69XK9_ORYSJ]	26.17	3		cytoplasm; mitochondrion			1.0576	5.53213	1.02602	20.0082	1.20778	18.2183	0.971155	13.3814	0.99266	12.4924	0.952907	23.5273	16.1231	9.74463
Q6H5B5	Os09g0379900 protein OS=Oryza sativa subsp. japonica GN=P0027G10.24 PE=4 SV=1 - [Q6H5B5_ORYSJ]	3.47	2	catalytic activity		metabolic process	Pf03639	1.02492	2.43594	0.913233	0.0159664	1.01524	9.91279	0.935592	3.46571	0.960478	9.10973	0.955166	2.23855	75.9729	6.20166
Q6YUA7	Os08g0464000 protein OS=Oryza sativa subsp. japonica GN=B1116H04.25 PE=2 SV=1 - [Q6YUA7_ORYSJ]	8.71	2	enzyme regulator activity; protein binding		metabolic process; regulation of biological process; response to stimulus	Pf08327; Pf09229	0.993054	2.73848	0.811012	29.847	0.94496	22.7553	0.829668	20.7388	0.786848	24.1886	0.841955	37.5651	39.203	5.50342
A2Y8U6	SPX domain-containing membrane protein OsI_21475 OS=Oryza sativa subsp. indica GN=OsI_21475 PE=3 SV=1 - [SPXM3_ORYSI]	6.3	4	transporter activity	cytoplasm; membrane; vacuole	transport	Pf00083; Pf03105; Pf07690	0.946642	11.9217	1.09487	32.9862	1.19135	36.1081	1.04747	15.185	1.0281	3.22182	1.13526	16.3302	77.6004	8.22119
Q2R4Y1	Os11g0456300 protein OS=Oryza sativa subsp. japonica GN=Os11g0456300 PE=4 SV=1 - [Q2R4Y1_ORYSJ]	20.23	5			metabolic process	Pf01466; Pf03931	1.1305	8.6546	1.11308	15.9612	1.05958	14.9037	1.03651	9.36158	1.04972	7.99336	0.990205	14.3465	19.0564	4.61475
A2YXT1	Putative uncharacterized protein OS=Oryza sativa subsp. indica GN=OsI_30147 PE=4 SV=1 - [A2YXT1_ORYSI]	10	3	catalytic activity		metabolic process	Pf00135; Pf07859; Pf10340	1.17399	3.73869	1.0661	18.6145	1.14549	21.1208	0.947808	10.3483	0.963903	4.99105	0.979772	10.6231	34.2624	5.59229
B8B7A7	Putative uncharacterized protein OS=Oryza sativa subsp. indica GN=OsI_24881 PE=4 SV=1 - [B8B7A7_ORYSI]	3.5	2	catalytic activity; nucleotide binding; protein binding	cytoplasm; membrane	metabolic process	Pf00069; Pf07714; Pf08263	0.978964	8.32125	1.11392	14.4906	1.00016	30.6007	1.04917	3.64476	0.995082	7.17165	1.11193	9.6208	109.937	6.11279
C7J1M0	Os04g0287175 protein (Fragment) OS=Oryza sativa subsp. japonica GN=Os04g0287175 PE=4 SV=1 - [C7J1M0_ORYSJ]	8.42	1	catalytic activity; nucleotide binding		metabolic process	Pf00069; Pf07714	0.868269		0.854178		1.00919		0.873385		1.11087		1.02788		29.3715	5.12256
Q0E3F2	Os02g0177900 protein (Fragment) OS=Oryza sativa subsp. japonica GN=Os02g0177900 PE=4 SV=1 - [Q0E3F2_ORYSJ]	7.1	2	catalytic activity	cytoplasm	metabolic process	Pf02782	1.28406	35.7377	1.49186	62.4194	1.26454	43.9674	1.16895	41.2596	1.0264	18.354	1.02273	19.4378	37.6283	7.00537
Q6K9N6	Succinyl-CoA ligase [ADP-forming] subunit beta, mitochondrial OS=Oryza sativa subsp. japonica GN=Os02g0621700 PE=1 SV=1 - [SUCB_ORYSJ]	11.85	5	catalytic activity; metal ion binding; nucleotide binding	cytoplasm; mitochondrion	metabolic process; response to stimulus	Pf00549; Pf08442	0.844524	8.17259	0.779231	10.9585	0.79588	8.37118	1.07915	5.54368	1.20138	6.17133	1.08775	3.04462	45.0627	6.31592
Q69V45	Calcium-binding EF hand-like protein OS=Oryza sativa subsp. japonica GN=P0556B08.33 PE=2 SV=1 - [Q69V45_ORYSJ]	22.77	5	metal ion binding	cytoplasm			0.973054	6.94017	0.943476	14.9676	1.04364	3.85612	0.998451	3.00435	0.988778	4.13981	0.972426	3.496	25.8615	4.79248
B9FQE9	Putative uncharacterized protein OS=Oryza sativa subsp. japonica GN=OsJ_22310 PE=4 SV=1 - [B9FQE9_ORYSJ]	3.16	2			cell growth; cell organization and biogenesis; development; reproduction	Pf10191	1.12887	10.8445	1.0584	18.9164	1.18077	4.18917	0.912014	7.11838	1.01856	5.79253	1.06861	1.46972	86.7647	4.99561
Q6EQH2	Os09g0345000 protein OS=Oryza sativa subsp. japonica GN=OSJNBb0085I16.13 PE=4 SV=1 - [Q6EQH2_ORYSJ]	11.21	1		cytoplasm			0.972861	9.18539	1.04377	3.59214	1.26058	6.45659	1.13298	0.577127	1.12285	6.98294	1.15411	5.51673	12.8975	5.94775
A6MZH2	Bowman-Birk type bran trypsin inhibitor (Fragment) OS=Oryza sativa subsp. indica PE=2 SV=1 - [A6MZH2_ORYSI]	30.88	6	enzyme regulator activity	extracellular	metabolic process; regulation of biological process		0.916177	16.1525	0.997434	17.2101	0.96417	23.2547	1.04926	8.54697	1.04947	11.6679	1.10626	13.6885	24.203	5.78271
B9FB92	Putative uncharacterized protein OS=Oryza sativa subsp. japonica GN=OsJ_12394 PE=3 SV=1 - [B9FB92_ORYSJ]	4.63	2	catalytic activity	membrane	metabolic process	Pf00332	0.970567	10.2524	1.03121	9.63369	0.975794	7.81991	0.953179	8.2958	0.825098	19.7252	0.895404	8.33112	43.9288	7.89893
A2YNL0	Putative uncharacterized protein OS=Oryza sativa subsp. indica GN=OsI_26825 PE=4 SV=1 - [A2YNL0_ORYSI]	16.67	1		cytoplasm; membrane		Pf07876	0.971539	1.54353	0.932537	11.8488	0.981107	8.48368	0.985558	3.85655	1.02928	3.06949	0.971819	2.87954	23.7156	6.20166
A2Z5X0	Putative uncharacterized protein OS=Oryza sativa subsp. indica GN=OsI_33044 PE=3 SV=1 - [A2Z5X0_ORYSI]	4.3	2	catalytic activity; metal ion binding	cytoplasm	metabolic process; response to stimulus	Pf00067	1.10877	17.6375	1.27653	16.4305	1.10922	2.81701	0.984041	1.99062	0.914799	15.963	1.03522	1.14521	58.4535	7.00537
Q9AV87	60S ribosomal protein L21 OS=Oryza sativa subsp. japonica GN=OSJNBa0006L06.3 PE=4 SV=1 - [Q9AV87_ORYSJ]	25	1	structural molecule activity	cytoplasm; cytosol; mitochondrion; nucleus; organelle lumen; ribosome	metabolic process	Pf01157	1.00715	9.82207	0.934096	23.589	0.790764	9.98387	0.937642	10.8219	0.854334	9.71173	0.866496	11.6505	18.7081	10.5796
B9F1I6	Putative uncharacterized protein OS=Oryza sativa subsp. japonica GN=OsJ_07840 PE=4 SV=1 - [B9F1I6_ORYSJ]	5.56	7	catalytic activity	membrane	metabolic process	Pf00082; Pf12580	1.01343	2.6132	0.990522	13.4956	1.009	24.529	0.938031	7.38007	0.956869	6.38777	0.901852	13.7845	142.238	6.17627
C7J6Y0	Os09g0482780 protein OS=Oryza sativa subsp. japonica GN=Os09g0482780 PE=4 SV=1 - [C7J6Y0_ORYSJ]	10.42	3				Pf02469	0.98438	8.29669	0.933717	11.4253	0.937737	10.4702	1.0499	5.82684	1.06193	3.65475	0.9716	6.29729	25.8536	9.75928
B8B2H9	Putative uncharacterized protein OS=Oryza sativa subsp. indica GN=OsI_24451 PE=4 SV=1 - [B8B2H9_ORYSI]	13.24	1				Pf02519	1.15943		1.97454		2.17288		1.1224		1.06189		1.49736		13.8619	9.0708
Q7XTA4	OSJNBa0008A08.6 protein OS=Oryza sativa subsp. japonica GN=OSJNBa0008A08.6 PE=4 SV=2 - [Q7XTA4_ORYSJ]	1.24	1	transporter activity		transport	Pf03810; Pf08389; Pf08506	1.04097	1.78595	1.09212	6.94961	1.01638	11.6715	0.973008	4.85126	0.936893	5.11158	1.04076	5.97196	93.3021	5.46533
Q6ZBK6	Os08g0519400 protein OS=Oryza sativa subsp. japonica GN=P0689E12.19 PE=4 SV=1 - [Q6ZBK6_ORYSJ]	11.06	5	catalytic activity; motor activity; protein binding	chromosome; cytoplasm; cytoskeleton; endoplasmic reticulum; membrane; nucleus; organelle lumen	cell organization and biogenesis; reproduction	Pf00261; Pf01576; Pf03962; Pf04156; Pf05483; Pf05557; Pf05622; Pf05667; Pf08317; Pf10211; Pf12128; Pf12329; Pf12718	0.943478	1.1657	0.927832	1.21607	0.93158	6.3865	1.03432	7.80492	1.00149	8.72566	0.99444	15.2759	50.8263	9.39307
B9FUE6	Putative uncharacterized protein OS=Oryza sativa subsp. japonica GN=OsJ_25251 PE=3 SV=1 - [B9FUE6_ORYSJ]	13.67	6	catalytic activity; nucleotide binding; protein binding		cell communication; development; metabolic process; regulation of biological process; response to stimulus	Pf00023; Pf00069; Pf07714; Pf12796	0.958048	4.29629	0.948105	12.253	0.885923	6.00872	0.940719	11.819	0.973322	15.4359	0.953326	15.9045	44.5131	7.37158
Q01HR1	OSIGBa0153E02-OSIGBa0093I20.14 protein OS=Oryza sativa GN=OSIGBa0153E02-OSIGBa0093I20.14 PE=4 SV=1 - [Q01HR1_ORYSA]	4.83	1		membrane	transport	Pf03169	1.20666		1.19654		1.00593		1.10673		1.08713		1.21265		78.792	8.92432
Q0DB62	Os06g0598900 protein OS=Oryza sativa subsp. japonica GN=Os06g0598900 PE=4 SV=1 - [Q0DB62_ORYSJ]	17.54	5	protein binding			Pf00400	1.03212	4.22093	1.01864	17.0708	1.0114	20.6141	0.873225	3.26418	0.917007	6.69774	0.935234	7.36937	37.2402	5.73193
A2Y6C6	Putative uncharacterized protein OS=Oryza sativa subsp. indica GN=OsI_20560 PE=3 SV=1 - [A2Y6C6_ORYSI]	10.02	3	catalytic activity	cytoplasm; vacuole	metabolic process	Pf00112; Pf00396; Pf03051; Pf08246	0.946012	21.9608	1.03049	29.6603	1.09865	28.751	1.11056	2.46626	1.06787	9.40207	1.16681	14.0512	47.5324	6.1001
Q6UUN6	Putative poly(A)-binding protein OS=Oryza sativa subsp. japonica GN=OsJ_26851 PE=4 SV=1 - [Q6UUN6_ORYSJ]	4.17	1	nucleotide binding; RNA binding			Pf00076; Pf08777	0.921328	5.66177	0.816138	3.2589	0.879164	0.704016	1.03066	6.38105	1.03662	1.7433	0.98758	7.41993	49.778	8.19189
Q7XHB3	Class III peroxidase 125 OS=Oryza sativa subsp. japonica GN=prx125 PE=2 SV=1 - [Q7XHB3_ORYSJ]	11.31	4	antioxidant activity; catalytic activity; metal ion binding	cytoplasm; extracellular; membrane; vacuole	cell growth; cell organization and biogenesis; defense response; metabolic process; regulation of biological process; response to stimulus	Pf00141	0.876169	15.4293	0.8266	14.954	0.85066	13.4762	1.10094	7.43653	1.1262	9.26929	1.03687	7.70586	35.6775	4.95752
Q0DRT9	Os03g0355600 protein (Fragment) OS=Oryza sativa subsp. japonica GN=Os03g0355600 PE=4 SV=1 - [Q0DRT9_ORYSJ]	15.45	13	transporter activity	cytoplasm; membrane	transport	Pf01602; Pf02883; Pf09066; Pf12717	0.934015	6.02367	0.912188	5.28515	0.903949	9.0377	1.02402	8.71345	1.06585	8.9008	0.987571	8.7585	98.7702	5.12256
B8BDP0	Putative uncharacterized protein OS=Oryza sativa subsp. indica GN=OsI_30648 PE=4 SV=1 - [B8BDP0_ORYSI]	4.61	4	nucleotide binding	membrane	defense response; response to stimulus	Pf00931; Pf12799	1.13854	10.0648	1.13243	19.0188	1.17207	15.2472	1.0587	19.2826	0.997256	24.0996	0.916982	15.1184	101.74	5.97314
Q5NAG4	Putative uncharacterized protein P0417G05.40 OS=Oryza sativa subsp. japonica GN=P0492F05.6 PE=4 SV=1 - [Q5NAG4_ORYSJ]	7.09	1		cytoplasm			1.07004	3.70094	1.10826	9.13811	1.13559	12.3223	0.820191	5.0343	0.802872	2.31339	0.852924	6.4091	12.4445	8.23584
A3BAT4	Putative uncharacterized protein OS=Oryza sativa subsp. japonica GN=OsJ_21016 PE=4 SV=1 - [A3BAT4_ORYSJ]	7.31	3	catalytic activity; nucleotide binding	cytoplasm	metabolic process	Pf00069; Pf07714	1.06391	2.75459	1.13355	5.0211	0.984713	7.20519	0.991381	7.25977	0.994985	7.51508	0.977864	4.19783	52.2072	9.37842
H2KX77	Expressed protein OS=Oryza sativa subsp. japonica GN=LOC_Os12g03060 PE=4 SV=1 - [H2KX77_ORYSJ]	3.22	1		membrane			0.87123	1.56788	0.796995	5.90772	0.870667	2.05085	1.0176	7.00431	1.08037	1.77514	1.06256	8.86278	33.4046	5.2876
Q0D402	Os07g0656800 protein OS=Oryza sativa subsp. japonica GN=Os07g0656800 PE=2 SV=1 - [Q0D402_ORYSJ]	10.81	1	catalytic activity				0.597018		1.03292		1.2674		0.777335		0.72243		1.10439		19.8797	5.32568
C7IZL4	Os03g0854400 protein OS=Oryza sativa subsp. japonica GN=Os03g0854400 PE=4 SV=1 - [C7IZL4_ORYSJ]	16.48	2	catalytic activity; RNA binding	membrane	metabolic process		1.04258	10.7043	1.22454	44.587	1.2093	29.8892	1.15118	15.2555	1.08408	9.20892	1.08885	16.7575	17.8785	10.1401
A3B999	3-oxoacyl-[acyl-carrier-protein] synthase OS=Oryza sativa subsp. japonica GN=OsJ_20447 PE=3 SV=1 - [A3B999_ORYSJ]	3.05	1	catalytic activity	cytoplasm	metabolic process	Pf00109; Pf02801	0.895301	5.80151	0.893166	4.33782	1.07432	11.3583	1.06797	18.8582	1.1272	10.8689	1.22223	17.5741	44.8908	7.50342
E6Y6L2	Alcohol dehydrogenase I (Fragment) OS=Oryza sativa subsp. japonica GN=Adh1 PE=4 SV=1 - [E6Y6L2_ORYSJ]	16.89	5	catalytic activity; metal ion binding; nucleotide binding	membrane	metabolic process	Pf00107; Pf08240	1.01101	4.20997	1.0471	11.1753	1.03517	9.14733	1.03835	10.4754	1.0297	4.42307	1.0401	7.44346	31.923	7.00537
B9EV54	Putative uncharacterized protein OS=Oryza sativa subsp. japonica GN=OsJ_01243 PE=4 SV=1 - [B9EV54_ORYSJ]	16.83	4	enzyme regulator activity; metal ion binding		metabolic process; regulation of biological process; response to stimulus	Pf00031	1.0076	12.0841	1.03303	29.6908	0.941952	17.4002	0.939844	7.83237	0.847188	11.7214	0.890713	13.6657	23.2619	6.22705
Q336W0	Ubiquitin family protein, expressed OS=Oryza sativa subsp. japonica GN=LOC_Os10g39620 PE=4 SV=1 - [Q336W0_ORYSJ]	14.92	6	protein binding			Pf00240; Pf11976	1.05308	12.7458	1.15434	24.73	1.0853	11.2891	0.943333	4.60882	0.91203	7.6091	0.923834	3.42091	49.1795	4.93213
B8B6Y0	Putative uncharacterized protein OS=Oryza sativa subsp. indica GN=OsI_26316 PE=4 SV=1 - [B8B6Y0_ORYSI]	6.08	2	catalytic activity; nucleotide binding	membrane	metabolic process	Pf00069; Pf01657; Pf07714	0.894709	11.9134	0.920359	7.6576	0.942037	7.41732	1.01444	14.1161	0.984276	0.289895	0.968546	4.2449	73.2534	5.40186
Q10R10	Hydrolase, carbon-nitrogen family protein, expressed OS=Oryza sativa subsp. japonica GN=Os03g0175600 PE=2 SV=1 - [Q10R10_ORYSJ]	3.87	1	catalytic activity; metal ion binding	cytoplasm	metabolic process	Pf00795	0.965998	2.91689	0.948659	5.34001	0.92486	5.01186	0.993091	5.78136	1.03485	6.41614	1.01666	5.28012	33.6219	5.69385
Q7XXQ8	Os06g0232000 protein OS=Oryza sativa subsp. japonica GN=P0479H10.4-1 PE=2 SV=1 - [Q7XXQ8_ORYSJ]	14.96	6					1.10995	10.3655	1.17023	16.3143	1.10263	9.91618	0.827403	14.7192	0.812981	28.7299	0.949728	11.5238	41.6382	5.16064
Q0DCQ3	Os06g0301300 protein OS=Oryza sativa subsp. japonica GN=Os06g0301300 PE=4 SV=1 - [Q0DCQ3_ORYSJ]	2.24	3				Pf11919	0.959754	0.457764	0.948026	8.42706	0.959288	8.2391	0.962423	1.09314	1.01874	3.94328	0.963277	1.65701	184.718	7.59131
Q6YT98	CASP-like protein Os07g0442900 OS=Oryza sativa subsp. japonica GN=Os07g0442900 PE=2 SV=1 - [CSPL7_ORYSJ]	9.66	2		membrane		Pf04535	0.885192	10.9017	0.933098	26.4122	0.959348	35.6294	1.14491	3.80401	1.05879	9.67029	1.10252	5.73733	21.6286	9.86182
A2WYA7	Peptidyl-prolyl cis-trans isomerase OS=Oryza sativa subsp. indica GN=OsI_04911 PE=4 SV=1 - [A2WYA7_ORYSI]	9.49	1	catalytic activity	cytoplasm; vacuole	metabolic process	Pf00254	0.913077	0.9286	1.00026	4.74787	1.078	8.83099	0.86996	0.629081	0.98444	4.43186	0.97831	9.87073	16.7809	9.56885
A2ZM45	Putative uncharacterized protein OS=Oryza sativa subsp. indica GN=OsI_38903 PE=4 SV=1 - [A2ZM45_ORYSI]	5.02	2	protein binding; signal transducer activity		cell communication; development; regulation of biological process; reproduction; response to stimulus	Pf00651; Pf03000	1.05363	5.88135	1.42508	66.094	0.890148	28.4511	0.690686		0.728258	7.02374	0.803927	11.9844	69.6089	5.59229
B8AMT5	Putative uncharacterized protein OS=Oryza sativa subsp. indica GN=OsI_14214 PE=4 SV=1 - [B8AMT5_ORYSI]	3.24	2	protein binding	cytoplasm; cytosol; nucleus	transport	Pf00887; Pf01344	1.06447	2.20697	1.01779	3.91787	0.934259	5.60158	0.976965	0.715022	0.998733	3.5431	0.97267	1.65737	67.6256	5.2749
A2YXU2	Proteasome subunit alpha type-7-A OS=Oryza sativa subsp. indica GN=OsI_029135 PE=2 SV=2 - [PSA7A_ORYSI]	15.26	1	catalytic activity	cytoplasm; cytoskeleton; cytosol; membrane; nucleus; proteasome; ribosome; vacuole	metabolic process	Pf00227; Pf10584	0.972454		0.877179		0.995367		0.924746		1.04919		1.00084		27.2791	7.43018
C7J2C3	Os05g0310500 protein (Fragment) OS=Oryza sativa subsp. japonica GN=Os05g0310500 PE=3 SV=1 - [C7J2C3_ORYSJ]	17.95	3	catalytic activity	cytoplasm; vacuole	metabolic process	Pf00112	1.06301	9.98727	1.02483	25.4047	1.00657	21.3936	1.11366	10.815	1.02993	17.2832	1.0274	5.8369	25.9659	5.38916
B8AWM4	Superoxide dismutase OS=Oryza sativa subsp. indica GN=OsI_19472 PE=3 SV=1 - [B8AWM4_ORYSI]	16.02	3	antioxidant activity; catalytic activity; metal ion binding	cytoplasm; mitochondrion	defense response; development; metabolic process; reproduction; response to stimulus	Pf00081; Pf02777	0.983733	9.41081	0.986894	10.5213	1.03705	16.2318	1.02402	10.9627	1.00942	3.26759	1.0961	8.32675	25.0389	7.31299
A2Z3I9	Proteasome subunit alpha type-7-B OS=Oryza sativa subsp. indica GN=PAD1 PE=2 SV=1 - [PSA7B_ORYSI]	15.26	1	catalytic activity	cytoplasm; cytoskeleton; cytosol; membrane; nucleus; proteasome; ribosome; vacuole	metabolic process	Pf00227; Pf10584	0.982269		0.887481		0.928392		0.924744		0.988708		1.00799		27.1972	7.92822
Q10NZ0	NB-ARC domain containing protein, expressed OS=Oryza sativa subsp. japonica GN=LOC_Os03g14900 PE=2 SV=1 - [Q10NZ0_ORYSJ]	8.84	7	nucleotide binding; protein binding	cytoplasm	defense response; response to stimulus	Pf00931; Pf12799	0.959519	3.58101	0.97516	13.9716	1.00334	13.4994	1.09132	6.95516	1.04436	5.91304	1.08369	9.19323	100.683	7.07861
A2YCU6	Putative uncharacterized protein OS=Oryza sativa subsp. indica GN=OsI_22937 PE=4 SV=1 - [A2YCU6_ORYSI]	4.39	2	catalytic activity			Pf04577	1.21486	13.215	1.41234	35.9245	1.36231	19.7282	1.16419	18.1837	0.984718	8.20729	1.14074	11.4967	58.3579	6.85889
Q6H3Z6	Metal-nicotianamine transporter YSL2 OS=Oryza sativa subsp. japonica GN=YSL2 PE=2 SV=2 - [YSL2_ORYSJ]	4.01	1	transporter activity	membrane	development; reproduction; response to stimulus; transport	Pf03169	1.04156		1.20026		1.06016		1.07056		0.755569		0.72334		73.2947	8.82178
Q6ZHA3	Rac-like GTP-binding protein 6 OS=Oryza sativa subsp. japonica GN=RAC6 PE=2 SV=1 - [RAC6_ORYSJ]	17.26	2	nucleotide binding; protein binding	cytoplasm; cytoskeleton; membrane; nucleus; organelle lumen	cell communication; cell differentiation; cell growth; cell organization and biogenesis; development; regulation of biological process; reproduction; response to stimulus; transport	Pf00071; Pf08477	0.979234	19.5018	0.941462	21.6399	1.03929	26.6409	1.14807	12.8255	1.13344	6.27946	1.18313	26.442	21.6103	9.1001
Q2R0X0	Os11g0629200 protein OS=Oryza sativa subsp. japonica GN=Os11g0629200 PE=2 SV=1 - [Q2R0X0_ORYSJ]	9.21	2		cytoplasm; endosome; membrane	transport	Pf03643	0.949507	2.22954	0.951069	7.38539	0.972075	4.41876	1.09889	6.41557	1.1424	7.90797	1.077	4.60454	35.3082	7.40088
Q6K5K6	Putative b-keto acyl reductase OS=Oryza sativa subsp. japonica GN=OJ1212_D02.8 PE=3 SV=1 - [Q6K5K6_ORYSJ]	12.99	2	catalytic activity; nucleotide binding		metabolic process	Pf00106	1.04846	8.27176	1.16125	10.2636	1.0284	12.2274	1.11007	3.00617	0.997162	8.40932	0.971706	2.90214	28.0748	9.48096
Q6YPF2	Os08g0120500 protein OS=Oryza sativa subsp. japonica GN=B1203H11.9 PE=4 SV=1 - [Q6YPF2_ORYSJ]	4.33	3				Pf02847	1.06011	7.94928	1.06058	9.92844	1.00935	6.45893	1.03882	2.77443	1.036	8.10683	1.0039	4.38279	78.5352	5.26221
Q5Z7H5	Os06g0557100 protein OS=Oryza sativa subsp. japonica GN=OSJNBa0090E14.8 PE=4 SV=1 - [Q5Z7H5_ORYSJ]	3.55	3	catalytic activity; nucleotide binding; protein binding	cytoplasm; membrane	metabolic process	Pf00069; Pf07714; Pf08263	1.06324	2.82986	1.44663	13.7917	1.41474	20.7021	1.0188	0.970728	0.848029	3.16698	1.06552	0.374036	111.442	5.52881
Q6ZL37	Putative karyopherin-beta 3 variant OS=Oryza sativa subsp. japonica GN=OJ1699_E05.43 PE=4 SV=1 - [Q6ZL37_ORYSJ]	7.21	8	protein binding; transporter activity		transport	Pf06122	1.0112	10.4244	1.03588	27.8666	1.00037	19.9818	0.975606	8.55689	0.940287	10.4704	0.920021	10.415	122.709	4.91943
Q338H2	Oxidoreductase family, NAD-binding Rossmann fold containing protein, expressed OS=Oryza sativa subsp. japonica GN=LOC_Os10g26390 PE=4 SV=2 - [Q338H2_ORYSJ]	6.84	1	catalytic activity; nucleotide binding	cytoplasm	metabolic process	Pf01408	1.18108	29.1248	1.33583	51.9146	1.15416	15.2995	1.028	13.7315	1.03146	8.70678	1.04985	16.0019	20.0633	8.33838
Q8W3N9	26S proteasome regulatory particle triple-A ATPase subunit3 (Fragment) OS=Oryza sativa subsp. japonica GN=OsRPT3 PE=2 SV=1 - [Q8W3N9_ORYSJ]	5.71	1	catalytic activity; nucleotide binding	cytoplasm; proteasome	metabolic process; reproduction; response to stimulus	Pf00004; Pf00006; Pf01057; Pf01078; Pf05496; Pf05673; Pf06068; Pf07724; Pf07726; Pf07728; Pf10236	0.933586	1.06588	0.833635	10.5165	0.834645	20.8163	0.896439	8.27162	0.889364	7.52349	0.844591	4.7083	41.3725	6.29053
A2X226	Putative uncharacterized protein OS=Oryza sativa subsp. indica GN=OsI_06251 PE=4 SV=1 - [A2X226_ORYSI]	7.19	2	enzyme regulator activity; metal ion binding; protein binding	cytoplasm; Golgi; membrane; vacuole	metabolic process; regulation of biological process	Pf00168; Pf01412	0.92868	8.74284	0.832979	12.2993	0.902364	2.50919	0.920463	1.43924	0.986872	14.1079	0.942739	8.42645	35.1707	5.79541
Q8GSZ9	Armadillo repeat-containing protein-like OS=Oryza sativa subsp. japonica GN=P0466H10.39 PE=2 SV=1 - [Q8GSZ9_ORYSJ]	10.12	6	protein binding			Pf04826	0.965567	14.6774	0.937529	26.5565	1.00648	17.5769	0.953033	12.7993	1.02831	1.6211	1.00253	9.56412	72.6532	7.03467
A3B7K2	L-lactate dehydrogenase OS=Oryza sativa subsp. japonica GN=OsJ_19824 PE=3 SV=1 - [A3B7K2_ORYSJ]	3.59	1	catalytic activity; nucleotide binding	cytoplasm; membrane	metabolic process; response to stimulus	Pf00056; Pf02866	1.12334	14.3212	1.11745	22.7335	1.23865	20.732	0.99927	7.80007	0.981507	7.67654	1.04806	15.7732	35.7252	8.76318
A3B8G2	Putative uncharacterized protein OS=Oryza sativa subsp. japonica GN=OsJ_20149 PE=4 SV=1 - [A3B8G2_ORYSJ]	6.4	3	catalytic activity; nucleotide binding	cytoplasm; cytosol; membrane	metabolic process	Pf00365	1.03052	6.53669	1.11765	17.1617	1.3994	11.218	1.01295	19.894	1.0605	2.48621	1.04349	13.8146	55.8572	7.25439
Q7F2E5	P0402A09.25 protein OS=Oryza sativa subsp. japonica GN=P0402A09.25 PE=4 SV=1 - [Q7F2E5_ORYSJ]	14.36	2		cytoplasm; endoplasmic reticulum; membrane		Pf05753	1.03123	5.75312	1.12185	25.0543	1.08892	11.0636	0.970829	4.40073	1.06023	6.72641	0.999435	14.2347	20.1909	9.62744
A2ZK22	Putative uncharacterized protein OS=Oryza sativa subsp. indica GN=OsI_38175 PE=3 SV=1 - [A2ZK22_ORYSI]	4.57	1	catalytic activity; metal ion binding	cytoplasm; vacuole	metabolic process; response to stimulus	Pf00883	1.09249		1.10288		1.15789		0.771241		0.871987		0.834155		55.0541	5.65576
Q7XKI9	OSJNBa0038O10.19 protein OS=Oryza sativa subsp. japonica GN=OSJNBa0038O10.19 PE=2 SV=2 - [Q7XKI9_ORYSJ]	6.05	2				Pf03097	0.994404	10.5643	0.927243	16.0406	0.910192	4.4275	0.841751	15.1978	0.91855	3.1037	0.893816	10.4873	45.4265	7.54736
Q6ZFF2	Os08g0482600 protein OS=Oryza sativa subsp. japonica GN=OJ1111_H02.12 PE=2 SV=1 - [Q6ZFF2_ORYSJ]	11.05	2	metal ion binding	cytoplasm		Pf02298	0.901282	8.07384	0.871641	20.4137	0.96476	4.1	1.12283	19.6648	1.20594	12.7953	1.11855	16.4568	17.9	6.66846
B9G059	Putative uncharacterized protein OS=Oryza sativa subsp. japonica GN=OsJ_26793 PE=3 SV=1 - [B9G059_ORYSJ]	7.42	5	catalytic activity; nucleotide binding	cytoplasm; membrane; mitochondrion	metabolic process	Pf00587; Pf02824; Pf03129; Pf07973	1.01983	10.2781	0.957899	12.436	0.940955	12.1933	0.986727	8.23353	1.07336	14.7635	0.974422	7.11042	79.9726	6.771
Q0DL03	Os05g0132100 protein OS=Oryza sativa subsp. japonica GN=Os05g0132100 PE=4 SV=1 - [Q0DL03_ORYSJ]	11.81	8	catalytic activity		metabolic process	Pf00501	0.955266	10.7482	0.890856	13.8037	0.832003	9.3489	1.0482	12.0584	1.10758	7.43627	1.01543	9.65579	74.8672	7.56201
[truncated: 1,775 more rows]
