# Supplementary material for: Comparative Proteomic Analysis of Plasma Membrane Proteins in Rice Leaves Reveals a Vesicle Trafficking Network in Plant Immunity That Is Provoked by Blast Fungi
Source: Front Plant Sci. 2022 Apr 25;13:853195. doi: 10.3389/fpls.2022.853195 (PMC9083198; doi:10.3389/fpls.2022.853195)
Supplement: Supplementary file 7 [file Table_7.XLSX]

## Sheet: Sheet1
Supplemental Table S7. The list of up-regualted DEPs in Heikezijing (Hei) after 24h of M.oryzae infection compared with 0h.
No.	Uniprot ID	Average Fold Change	FDR
1	A2WN93	1.10055	0.0728223
2	Q6K5R6	1.10117	0.069129
3	J7H3S8	1.10123	0.0449811
4	H2KW82	1.10142	0.0172488
5	Q6YS69	1.10166	0.0698293
6	Q8H811	1.10275	0.0601407
7	Q6K1Q6	1.1032	0.0306918
8	Q5QNI2	1.10373	0.069129
9	Q0IQK7	1.10389	0.0855965
10	Q6ATN8	1.10452	0.0315481
11	Q75LD0	1.10467	0.0649536
12	Q5ZED1	1.10533	0.0353179
13	Q6AUF8	1.10561	0.0179419
14	B9F8Y4	1.10576	0.0276501
15	B9G2B5	1.10585	0.0946633
16	A3BDQ3	1.10599	0.0601407
17	B8BAF5	1.10712	0.0212335
18	A3BP16	1.10718	0.062197
19	Q84MQ4	1.10735	0.0350813
20	P35685	1.10737	0.0371743
21	B8ANH1	1.10763	0.0276406
22	Q2QXN5	1.10837	0.0694101
23	Q942L2	1.10843	0.0698293
24	Q8L6I1	1.10889	0.0148746
25	A3ACC3	1.10998	0.0737779
26	Q7XEH4	1.11021	0.012581
27	Q6K8U8	1.11105	0.0805592
28	Q0JCQ8	1.11164	0.0748667
29	B8B9N6	1.11164	0.0284538
30	B8B8W3	1.11214	0.0820617
31	B9FZF6	1.11223	0.0934079
32	B9F3C7	1.11329	0.0944001
33	A2ZJB7	1.11345	0.0262198
34	Q7XHZ2	1.11348	0.0795607
35	A6MZH2	1.1137	0.0802542
36	Q6I633	1.11437	0.0598132
37	A2Y3B5	1.11443	0.0677973
38	Q0IXR7	1.11462	0.094458
39	B8A9Z2	1.11474	0.0953347
40	B8BK38	1.11547	0.0531471
41	Q0DCT6	1.11589	0.0787626
42	B8AMN4	1.11629	0.0709935
43	Q5XQQ5	1.11743	0.0877987
44	Q0D8D7	1.11764	0.0566405
45	B8BCN9	1.1179	0.0455272
46	B8B8Q3	1.11858	0.0513569
47	Q0DRT9	1.11901	0.0544854
48	A3A0I1	1.11944	0.069129
49	Q10SU0	1.11967	0.0915647
50	Q8RZ83	1.11988	0.0995174
51	B8A738	1.11992	0.0421146
52	Q943K7	1.12051	0.0517017
53	Q10G12	1.1217	0.0537031
54	Q653H4	1.12263	0.0855965
55	A2X4T7	1.12312	0.0342514
56	Q40665	1.12376	0.0523665
57	Q69UI1	1.12377	0.0747735
58	Q6ZLB8	1.12378	0.00912182
59	Q10P12	1.12396	0.0567525
60	Q6Z9G2	1.12412	0.0460395
61	Q851R5	1.12452	0.0632539
62	Q6ZIG4	1.12494	0.0132225
63	A2ZB00	1.1254	0.0371743
64	Q0DAZ7	1.12573	0.0301042
65	Q0DKF1	1.12646	0.0452481
66	A3BCZ3	1.12652	0.0598132
67	Q109P3	1.12665	0.0440101
68	Q7Y1I5	1.12783	0.0172488
69	C7J1V6	1.12903	0.0708836
70	K4FHN8	1.12941	0.0602501
71	Q762A0	1.12955	0.0601407
72	Q6ETD9	1.13023	0.0596387
73	A2Z3J5	1.1309	0.0698464
74	Q8H386	1.13091	0.0424351
75	B8B8E2	1.13091	0.0365364
76	Q9ASP4	1.13117	0.0778089
77	B8A790	1.1312	0.0455272
78	A3ALM5	1.13166	0.0958786
79	A2Y0T4	1.13188	0.0126856
80	B9G348	1.13241	0.0803125
81	B8B3J3	1.13269	0.0424351
82	A2Z490	1.13305	0.0526936
83	Q9SDG6	1.1333	0.0457592
84	Q10LN7	1.13375	0.0708836
85	A3BKU8	1.135	0.0459758
86	Q6YY17	1.13537	0.0903735
87	Q5Z4C9	1.13538	0.0713192
88	Q0IPL3	1.1354	0.0161495
89	Q8GU64	1.1359	0.0647002
90	Q2QQ14	1.13632	0.0457094
91	Q7XKE9	1.13664	0.0971639
92	A6N1J2	1.13779	0.078378
93	Q8L3Y6	1.13781	0.0727458
94	Q2R1J7	1.13786	0.0377996
95	A2X627	1.13809	0.0424351
96	A3C1N8	1.1384	0.0284448
97	A2YDY2	1.13855	0.0322418
98	B8AYJ5	1.13978	0.0109358
99	Q336M5	1.1411	0.0651496
100	B9F8X8	1.14127	0.0295662
101	Q6ZGV5	1.1415	0.0352155
102	B9FHK1	1.14156	0.0717701
103	A2XLX1	1.14188	0.0700852
104	Q6YZ10	1.14204	0.0389545
105	Q2QLJ6	1.14303	0.0461575
106	A2XTL5	1.14308	0.0145101
107	A2WU37	1.14331	0.0395822
108	A3BAC7	1.14397	0.0915647
109	Q5W723	1.14441	0.0959832
110	Q8RU48	1.14465	0.0187239
111	B9EYD6	1.14466	0.0526599
112	A2ZCQ7	1.14474	0.0627277
113	B9ET88	1.14488	0.0751784
114	Q8RU33	1.14562	0.0417972
115	B9G9H4	1.14571	0.0929891
116	P40392	1.14601	0.0424615
117	Q6L4F8	1.14674	0.0703516
118	A2XA86	1.14686	0.0369702
119	Q6YY64	1.14803	0.0838371
120	A2YUR3	1.14817	0.0563645
121	B9FCH7	1.14897	0.0421146
122	A2X8Y4	1.14906	0.0577587
123	B7FA01	1.14923	0.0929876
124	Q8H7Y2	1.14939	0.0698293
125	Q6ASY2	1.15057	0.0452481
126	Q7XTU1	1.15121	0.00785206
127	B8AIL1	1.15127	0.0517021
128	Q9ST80	1.15253	0.0239087
129	B8AZR2	1.15296	0.03769
130	O49218	1.15304	0.0317731
131	Q01HT5	1.15437	0.0216189
132	A2XX07	1.15467	0.0906162
133	B8ANG4	1.15474	0.0577228
134	O80384	1.15485	0.00612782
135	B8BI15	1.15489	0.0932056
136	Q94EA5	1.15493	0.078378
137	B9GC26	1.15493	0.0412405
138	Q2R0X0	1.15513	0.0236448
139	A2XLH5	1.15566	0.0526599
140	B9FT27	1.15609	0.0179419
141	Q65X81	1.15621	0.089636
142	Q8L5X0	1.15656	0.0661892
143	P41095	1.15725	0.0757303
144	B9FYZ4	1.15765	0.0558387
145	B1NY92	1.15813	0.0424351
146	Q6H883	1.15964	0.0244881
147	P49100	1.16088	0.0486611
148	Q7XPI5	1.16097	0.0614656
149	A6N001	1.16227	0.0664556
150	Q6ZLN7	1.16246	0.0214019
151	Q9SMB1	1.16301	0.0528178
152	P49398	1.16387	0.0307576
153	Q6AVV6	1.16434	0.0452481
154	A2X9M7	1.1646	0.0808302
155	Q654U5	1.16498	0.00834157
156	Q10LP3	1.16519	0.0787929
157	Q2R0I1	1.16575	0.0704736
158	Q6ZEZ1	1.16698	0.0704736
159	Q6UUN6	1.16748	0.0601407
160	B8BLH9	1.16758	0.036342
161	Q5QM99	1.16856	0.0693762
162	A2YJY0	1.16863	0.016475
163	Q0DEU8	1.16885	0.0115723
164	A2XEQ6	1.16931	0.0163001
165	A3REN3	1.16984	0.00785206
166	B8AER9	1.1701	0.0531471
167	Q5SMQ9	1.17028	0.00837452
168	Q6ZHA3	1.17049	0.0412405
169	Q5VS79	1.17066	0.0145101
170	A2X694	1.17124	0.0369702
171	B8B3X7	1.17155	0.0697436
172	Q7XV86	1.17183	0.075894
173	Q5KQL4	1.17259	0.0315481
174	Q6AVM8	1.17272	0.023879
175	Q7XRT0	1.17353	0.0517021
176	H2KX19	1.17386	0.00768832
177	B8AF79	1.17398	0.044852
178	Q6I608	1.17399	0.0965175
179	A2WT17	1.17425	0.031109
180	Q6Z5P1	1.17565	0.0307006
181	Q7XCM9	1.17663	0.0698293
182	Q5SNH7	1.17701	0.0802542
183	B8BAR4	1.17772	0.0855965
184	B8A6J9	1.17786	0.0508687
185	A2WL88	1.17806	0.0693762
186	B9FUS8	1.1788	0.023879
187	A2Y9F2	1.17886	0.0105274
188	Q10N04	1.17887	0.0707482
189	A2X5Y2	1.17894	0.0355442
190	B8BIC9	1.17913	0.0208911
191	B9FHL4	1.17931	0.0364693
192	B8B928	1.18072	0.069129
193	B8A885	1.18138	0.087918
194	A2YCI2	1.18149	0.0371743
195	Q6K4S7	1.1826	0.0378207
196	A3AQL3	1.18345	0.0677973
197	Q0DL03	1.18412	0.0775509
198	Q5JNB0	1.18453	0.0881182
199	B8BDV4	1.18458	0.0156204
200	Q9ZWF6	1.18498	0.0452845
201	B8ABN5	1.18554	0.0517021
202	A2YXF9	1.1857	0.0894795
203	Q0D5Z2	1.18641	0.0276406
204	Q8LI99	1.18754	0.0210796
205	Q658I5	1.18786	0.0371743
206	Q01J03	1.18803	0.0602501
207	Q75M08	1.18804	0.044852
208	A3CII5	1.18818	0.0179419
209	Q84QW4	1.1884	0.0133763
210	B7ELQ3	1.18885	0.0197912
211	Q6K209	1.18922	0.0407522
212	A2XDK8	1.18926	0.0508912
213	Q6YT98	1.1903	0.0395822
214	B8AZZ6	1.19097	0.0324696
215	B9F773	1.19141	0.03769
216	A6N1G6	1.1918	0.0324696
217	B7SDE4	1.19197	0.0324696
218	Q10RZ3	1.19337	0.055953
219	Q75HK2	1.19401	0.0150024
220	Q7XLR1	1.19523	0.0304643
221	A2XRT6	1.1955	0.0894795
222	Q0JBY7	1.19573	0.0303012
223	Q5TKP2	1.19651	0.0364693
224	Q5JK39	1.19821	0.046284
225	A2WL80	1.19844	0.0855965
226	Q69L85	1.19877	0.0513569
227	A2YU12	1.2007	0.0276406
228	B8BBB2	1.20136	0.0137665
229	Q0JAC6	1.20142	0.0416015
230	A3CJV0	1.2017	0.0150604
231	A2YBK1	1.2018	0.062197
232	Q6ER94	1.20191	0.0242022
233	B8AQA0	1.20232	0.00940242
234	Q01I92	1.20333	0.0179419
235	B9FFP1	1.20399	0.0714455
236	Q0J4H2	1.20413	0.0491545
237	Q53NG8	1.20578	0.0232231
238	Q84P96	1.20673	0.0648193
239	Q6Z808	1.2071	0.0452481
240	Q8H4Q9	1.20733	0.0598132
241	A2Z0D1	1.20754	0.0545752
242	A3C6V9	1.20794	0.0371743
243	Q84VF2	1.20905	0.0457094
244	Q8H3H8	1.2092	0.018658
245	B9EYR6	1.20932	0.0133763
246	A2X090	1.21012	0.0783509
247	Q7XIK5	1.21306	0.0808302
248	Q60EY9	1.21343	0.0698293
249	B9FZF4	1.21403	0.0950398
250	Q2QMN8	1.21582	0.0511873
251	Q5JLU1	1.2159	0.0148746
252	Q6L5F3	1.21714	0.028943
253	A3BRV6	1.21736	0.0133763
254	A2Z081	1.21744	0.00912182
255	Q9SXG0	1.21966	0.0127725
256	B8B6Z1	1.22012	0.0526599
257	A3BMI4	1.22039	0.0348248
258	B9G8A8	1.22067	0.0855965
259	B8AHM8	1.22119	0.0284734
260	Q655Y4	1.22209	0.0995174
261	Q5TKN4	1.22273	0.0434762
262	P50156	1.22273	0.025876
263	Q651M0	1.22322	0.0193612
264	B7E588	1.22384	0.00742648
265	Q8LM62	1.2246	0.0995174
266	Q653V5	1.22483	0.018919
267	Q259D2	1.22527	0.0198759
268	Q7XPL0	1.22534	0.00612782
269	B9F6K7	1.22738	0.030189
270	Q7FAK8	1.22798	0.0160785
271	B9FAY8	1.22904	0.018658
272	A2WZ27	1.2298	0.0307576
273	Q0DJW8	1.23081	0.0168042
274	Q653V9	1.2311	0.0322418
275	A2WX79	1.23206	0.0179419
276	Q7F0J0	1.23515	0.0965175
277	Q5QL24	1.23627	0.0424351
278	Q10QD5	1.23716	0.0155148
279	Q0JBB6	1.23812	0.078378
280	B8B0A9	1.2388	0.0369497
281	Q6ZJJ1	1.23962	0.0286862
282	Q6K489	1.24025	0.012581
283	Q6ATM0	1.24032	0.0276406
284	Q01K11	1.24065	0.0285415
285	Q8W5P3	1.24078	0.0374362
286	Q6YW62	1.2417	0.0244881
287	Q9AWV5	1.24207	0.0324724
288	Q5JMQ3	1.24211	0.0214562
289	A2ZWD3	1.24292	0.0497508
290	Q0D852	1.24335	0.0505612
291	B8BBP9	1.24425	0.0323245
292	Q94EF4	1.24428	0.025876
293	H2KX77	1.24485	0.0274797
294	Q2QVG9	1.24497	0.00912182
295	Q6L5I5	1.24515	0.069129
296	Q6ZJ15	1.24521	0.0299427
297	Q0DSB9	1.24565	0.038757
298	Q6ZCF8	1.2467	0.0232231
299	A2YH64	1.2471	0.022517
300	Q94DM7	1.24967	0.0549142
301	Q69K73	1.25312	0.0133763
302	Q69WE5	1.25573	0.0768438
303	B9FLM2	1.2559	0.0262782
304	Q6ZFF2	1.25921	0.0324696
305	C7IWI9	1.2596	0.0184003
306	Q8H567	1.25994	0.0449811
307	Q94DH6	1.25999	0.0105901
308	Q94GW8	1.26028	0.0536236
309	Q688W0	1.26121	0.0150604
310	B8AFN7	1.26238	0.00912182
311	Q942F3	1.26428	0.064679
312	Q6ZFV7	1.26428	0.0115723
313	Q7XNR1	1.26662	0.0614656
314	B8AXD5	1.26735	0.0395822
315	A2XUF3	1.2697	0.0155148
316	Q0DJC0	1.26989	0.0995174
317	B8B2F2	1.26997	0.0172488
318	Q75M17	1.27136	0.00987012
319	Q42456	1.27181	0.0479055
320	Q5VRZ8	1.27229	0.0155148
321	Q9LWT6	1.27479	0.0208911
322	Q7XHB3	1.27829	0.0196981
323	B9F8Z5	1.27944	0.00834157
324	B8AM24	1.27948	0.0684359
325	Q6Z5N4	1.28207	0.0129919
326	O23877	1.28912	0.0994285
327	Q0J0J5	1.28983	0.0304643
328	Q8H903	1.29229	0.0127725
329	Q259D7	1.29601	0.0652665
330	Q6Z1N4	1.2962	0.0168042
331	A2YSR0	1.29661	0.0324724
332	Q9AY39	1.29771	0.0115723
333	Q0JA85	1.29829	0.0164702
334	Q6ETY0	1.29933	0.0479055
335	A6MZR4	1.30081	0.0374362
336	Q6ZGK3	1.30242	0.0324696
337	P93425	1.30621	0.018658
338	Q6L502	1.3066	0.0276406
339	B9EXZ1	1.30809	0.00912182
340	Q7XM17	1.30876	0.00982067
341	B8AM35	1.30984	0.0191078
342	A6MZE1	1.31156	0.0621205
343	B9FFA3	1.31598	0.0814004
344	Q7XQN5	1.31826	0.0133763
345	O22541	1.3215	0.0929577
346	Q6Z6K0	1.32474	0.00811394
347	Q94J09	1.32652	0.0155644
348	Q10QV8	1.32742	0.00940242
349	Q75M32	1.32994	0.0216492
350	A2X4M4	1.3305	0.0145101
351	B9F0E8	1.33171	0.0885767
352	Q8GVQ2	1.33284	0.00987142
353	A2XS80	1.33287	0.018658
354	Q8H7U1	1.33307	0.0185999
355	B8A8F9	1.3344	0.0168042
356	D3DF43	1.33717	0.00987012
357	B9FBR2	1.34007	0.0191871
358	A2ZSP3	1.34223	0.00785206
359	B8BBQ1	1.34543	0.0084531
360	A3ADQ4	1.34614	0.00785206
361	Q2QU06	1.34671	0.0133763
362	Q5N7P9	1.34824	0.0698293
363	A2YMK6	1.34827	0.0203651
364	Q6ZGP5	1.34868	0.0187239
365	A2YHT8	1.35179	0.025876
366	A2YAL2	1.35237	0.00912182
367	A6N0S9	1.35531	0.0282336
368	Q10LF1	1.35694	0.0168042
369	A2XA53	1.36145	0.0245684
370	Q7XXS5	1.36342	0.00997296
371	Q5JK10	1.36374	0.0134651
372	Q0JB40	1.3756	0.0302548
373	A3B7K5	1.37925	0.0262406
374	Q53ND6	1.38114	0.0787929
375	B8AZB0	1.38333	0.027765
376	Q9FVY8	1.38629	0.00805548
377	A2WMA1	1.38919	0.0197912
378	Q94JA2	1.38995	0.00834157
379	Q6K9N6	1.39206	0.0238617
380	B8BE47	1.39457	0.0111949
381	Q8RZQ8	1.40111	0.00940242
382	Q84TA8	1.40201	0.0163562
383	A6N098	1.40679	0.00627954
384	Q8S3P3	1.40696	0.0317731
385	A2X8U1	1.41353	0.00675484
386	A3C9V8	1.41655	0.0145101
387	B8BM10	1.4234	0.0307576
388	B9FCV6	1.42593	0.0371743
389	Q6Z8F8	1.42882	0.016081
390	Q84SG9	1.43063	0.0197912
391	A2Y6J2	1.43502	0.00742648
392	A6N1L3	1.43647	0.0322418
393	A6N1B9	1.45668	0.00834157
394	Q0DWG3	1.45892	0.00876032
395	Q8S0T6	1.45952	0.0179101
396	Q10AC8	1.47318	0.0354889
397	Q76FS3	1.48398	0.00934965
398	Q0JDW8	1.4953	0.0210796
399	C7J2K4	1.49568	0.03769
400	Q7XVM2	1.49807	0.016081
401	A2XGN6	1.50004	0.0664556
402	A3C7S0	1.50244	0.00811394
403	B8B6Y8	1.50481	0.064679
404	B8B7B1	1.50689	0.0190097
405	Q7XC31	1.51479	0.00833141
406	B9FW54	1.516	0.0939742
407	A3AY29	1.52671	0.0210796
408	A2WSE7	1.52801	0.0491545
409	Q9FSQ6	1.53067	0.0239087
410	B8AGT9	1.5333	0.00871139
411	B9F8C3	1.53694	0.00834157
412	Q7XRE7	1.55876	0.00742648
413	Q6ZLA9	1.56198	0.0133763
414	B8BL20	1.56744	0.0317731
415	Q8LNB7	1.57125	0.0322418
416	B7F6N8	1.58514	0.0203651
417	Q7F1H3	1.60554	0.00912182
418	Q6Z1H2	1.62005	0.0890747
419	P45960	1.63098	0.00768832
420	Q0D9K5	1.67321	0.00785206
421	Q7XU54	1.67684	0.00834157
422	Q0J2E5	1.67942	0.0208492
423	Q10BA8	1.69215	0.00940242
424	B8AYF0	1.72942	0.00940242
425	Q6ZFJ0	1.82796	0.00811394
426	A2WZK9	1.84164	0.0362901
427	A2ZAS9	1.846	0.00811394
428	A2ZVA3	1.88632	0.0103776
429	Q6Z338	1.93525	0.0994285
430	A3BUC4	1.95045	0.00742648
431	B8BHS9	2.0516	0.00207285
432	Q9FXT4	2.12606	0.00811394
433	B8ALL8	2.14875	0.00811394
434	Q43594	2.16732	0.0031119
