# Supplementary material for: Comparative Proteomic Analysis of Plasma Membrane Proteins in Rice Leaves Reveals a Vesicle Trafficking Network in Plant Immunity That Is Provoked by Blast Fungi
Source: Front Plant Sci. 2022 Apr 25;13:853195. doi: 10.3389/fpls.2022.853195 (PMC9083198; doi:10.3389/fpls.2022.853195)
Supplement: Supplementary file 8 [file Table_8.XLSX]

## Sheet: Sheet1
Supplemental Table S8. The list of down-regualted DEPs in Heikezijing (Hei) after 24h of M.oryzae infection compared with 0h.
No.	Uniprot ID	Average Fold Change	FDR
1	Q8H7X7	0.462217	0.016081
2	Q0DUA4	0.465389	0.0172488
3	A3AJS7	0.466503	0.0323245
4	A2XHP7	0.475851	0.00885742
5	B9G7L7	0.495602	0.016081
6	A2ZJC1	0.505205	0.0421131
7	B8B1E4	0.533065	0.00940242
8	A2WSQ4	0.537803	0.0134651
9	Q2QLY9	0.541818	0.00742648
10	B9FR79	0.558427	0.039044
11	B8ATR4	0.569604	0.0210796
12	A2WRB8	0.578631	0.0245684
13	A2ZN62	0.581567	0.00834157
14	Q5JKJ0	0.581867	0.0317731
15	A2X7F5	0.588655	0.00101916
16	A2XZZ0	0.593021	0.00264014
17	A2X8C7	0.594724	0.0481988
18	Q2QWZ0	0.603919	0.0424351
19	Q9FW24	0.607107	0.0513569
20	B8BCQ7	0.607438	0.0808884
21	Q0E3C3	0.613531	0.0708836
22	A3CBT7	0.613723	0.0513569
23	C7J983	0.61511	0.0698293
24	B7EBJ5	0.621524	0.0163001
25	B7F3Z8	0.623367	0.0993234
26	Q7XWS9	0.62479	0.00627954
27	Q67TR6	0.624987	0.00940242
28	Q7XH16	0.625854	0.00675484
29	Q0DD57	0.629032	0.0469195
30	B9G7R8	0.630276	0.0249768
31	A2X8K8	0.632814	0.00834157
32	A2XK32	0.634871	0.0669632
33	Q69IM8	0.635248	0.0828379
34	Q7G602	0.638031	0.0119783
35	A2Y889	0.639502	0.016081
36	Q94DE5	0.640458	0.0708836
37	Q5VME5	0.642154	0.00785206
38	A3C6X2	0.644008	0.024144
39	B8BCN1	0.64595	0.0598132
40	A2YLE2	0.648526	0.00980588
41	Q84S63	0.648742	0.0417972
42	A3C6B8	0.650896	0.00912182
43	H9DW79	0.651148	0.0487331
44	Q6YVF0	0.65426	0.003603
45	B8AQ29	0.654474	0.0786778
46	Q7XR60	0.654624	0.0169167
47	Q6EP35	0.655083	0.0323245
48	B8A708	0.656368	0.069129
49	B8A8N0	0.656919	0.00912182
50	Q20IJ5	0.660259	0.0299427
51	Q8LJ11	0.661031	0.0487331
52	B8AUP6	0.666563	0.0971639
53	Q0IPF7	0.668334	0.00462464
54	Q0J125	0.67128	0.0778089
55	Q6Z4B7	0.672737	0.00785206
56	Q0J5T2	0.675316	0.0627277
57	B9FMV0	0.676272	0.0317731
58	H2KWA4	0.677599	0.0995987
59	Q5JMX3	0.678818	0.092202
60	Q10NH1	0.678905	0.0371743
61	Q10MC6	0.680495	0.0989103
62	Q6ZFM7	0.681985	0.00742648
63	Q6ZLK7	0.68353	0.0244881
64	Q9LD82	0.685644	0.0601407
65	A3A9Z4	0.689562	0.0133763
66	Q0DTS9	0.691085	0.0191078
67	A2WYG9	0.691927	0.0517021
68	Q5Z802	0.693008	0.0744967
69	P48642	0.69399	0.0184003
70	Q6YSB2	0.694047	0.069624
71	Q01L89	0.6945	0.018658
72	B8AWS4	0.695717	0.00912182
73	A2Y720	0.695839	0.025876
74	Q7XII4	0.697234	0.055953
75	B9FDN8	0.702524	0.00264014
76	A2ZXW2	0.706234	0.0526599
77	Q69LG6	0.707306	0.0424615
78	B8ADN7	0.707639	0.0799346
79	Q75LB9	0.711011	0.0889473
80	Q01HF3	0.712012	0.0353179
81	Q2QXR8	0.714392	0.0971639
82	A6N0M9	0.716034	0.0084531
83	Q6K7L5	0.719327	0.0396648
84	A2YJ67	0.720513	0.0929577
85	Q6ZKF1	0.720591	0.0989103
86	B9FV43	0.721224	0.089636
87	A2Z8F1	0.725869	0.00891247
88	B8AB94	0.727458	0.064679
89	Q75GA5	0.727686	0.0596387
90	B7EHA8	0.729147	0.00775723
91	Q6Z4C0	0.729593	0.0163143
92	A2YJM7	0.729736	0.0228076
93	Q10MH9	0.729772	0.0850445
94	A2Z8F9	0.730286	0.0929577
95	B9G2A8	0.731304	0.054112
96	Q7XD67	0.73162	0.0428808
97	A2ZEX7	0.731731	0.0306918
98	Q108X4	0.732614	0.0742186
99	Q6ZC56	0.73445	0.0903735
100	A2WML6	0.734894	0.0886616
101	A2WMB0	0.735314	0.025876
102	Q6YVH4	0.735586	0.0576717
103	B8B7Q9	0.736278	0.0354889
104	A2YQF5	0.738486	0.0526599
105	A2ZK22	0.738798	0.0184003
106	Q7XIM0	0.742231	0.0940306
107	Q10T50	0.742239	0.00975367
108	Q9SNM0	0.742787	0.0929876
109	A2X7X9	0.742809	0.0747735
110	A2XRZ0	0.744533	0.00811394
111	Q7X7F0	0.744973	0.036585
112	Q6K6B9	0.745825	0.0736198
113	Q01LD5	0.746914	0.0111385
114	Q5NAG4	0.747154	0.00987012
115	A2Z7M1	0.749212	0.0479055
116	B9GCX7	0.74978	0.0342514
117	A2XNF7	0.749863	0.0360737
118	A2Y5J3	0.75079	0.0352704
119	Q8H5P5	0.750879	0.0409272
120	Q69RL1	0.75094	0.0661608
121	Q0DJC4	0.753218	0.0428247
122	Q69MW7	0.754005	0.0313974
123	Q10L32	0.754234	0.00871139
124	Q84KJ7	0.757792	0.082374
125	A2ZLQ0	0.759706	0.0621205
126	B8AUD6	0.75971	0.0447209
127	A2Z129	0.759965	0.0907697
128	Q6AUW7	0.761566	0.0929876
129	P93419	0.761711	0.0729522
130	A2XGF5	0.763134	0.0239087
131	Q7XUP7	0.763225	0.0601407
132	B8BKF3	0.763616	0.069129
133	Q7XXQ8	0.765669	0.0377996
134	Q69L87	0.766298	0.0084531
135	Q7XI89	0.767042	0.069129
136	Q761Y6	0.767599	0.0913096
137	Q69TJ1	0.767869	0.00811394
138	Q8GSE8	0.769431	0.054112
139	B8AU20	0.769743	0.053197
140	B9FVM1	0.770075	0.0577228
141	Q0DAE4	0.771099	0.0444968
142	A2ZHF9	0.772612	0.00742648
143	Q10BD9	0.772788	0.0306918
144	A2YLE3	0.772981	0.0236669
145	A2Z4K2	0.773291	0.0677973
146	A2ZVD7	0.773832	0.0903735
147	Q8GRZ3	0.776811	0.0781503
148	Q8S1M5	0.776986	0.0929577
149	B8B0N6	0.777946	0.0159956
150	Q0D681	0.779806	0.0118918
151	Q93WY5	0.780555	0.0210796
152	Q5JQW1	0.780619	0.032132
153	B9FQR8	0.781888	0.0935854
154	Q6F321	0.782969	0.0865203
155	Q0D6U7	0.78299	0.064679
156	Q8H4X9	0.783763	0.0164017
157	P0C542	0.784141	0.0302548
158	Q8H859	0.784297	0.00742648
159	Q8GVE1	0.784349	0.0179419
160	B8AZM0	0.785246	0.0775509
161	A6N081	0.785679	0.00940242
162	B8B0Q4	0.785966	0.0461575
163	Q9FE01	0.786033	0.00785206
164	C7J7D7	0.786424	0.031109
165	Q5ZBH8	0.786798	0.0354889
166	A3BMQ3	0.786984	0.0929577
167	Q6ZCF3	0.788323	0.0356898
168	A2XB41	0.789252	0.0377996
169	Q2QYH1	0.789786	0.0526599
170	B8AGS8	0.789821	0.0276406
171	Q7XHC4	0.79049	0.0754776
172	Q851R0	0.791129	0.0590722
173	Q10L46	0.793213	0.0602501
174	Q01HW9	0.793502	0.012581
175	B9F3M8	0.793659	0.016081
176	Q7G649	0.794741	0.0172722
177	Q6YPF1	0.795138	0.00811394
178	Q651B1	0.795513	0.0529542
179	A2XB60	0.797914	0.0417972
180	A2YBZ3	0.798142	0.0633948
181	A2YCH5	0.798497	0.054112
182	A2XRR0	0.800055	0.0249768
183	B8AUC2	0.801971	0.0184003
184	Q67IZ5	0.80222	0.0191078
185	Q7XRB6	0.802424	0.00934965
186	A2ZHF1	0.802963	0.0661608
187	Q259N9	0.803419	0.0910919
188	Q53JH1	0.804131	0.0378207
189	Q94J22	0.804186	0.064679
190	B9FD14	0.804206	0.0371743
191	A2Y3G2	0.804708	0.0424615
192	A3BMM4	0.804878	0.0668382
193	A2X2N8	0.805635	0.0601407
194	A2Z431	0.806183	0.0567459
195	P0C030	0.806608	0.0651496
196	A2Z4G9	0.807973	0.0378207
197	B9ETN5	0.808476	0.0457094
198	Q8L4I2	0.80897	0.0348248
199	Q5JKQ2	0.80905	0.0799346
200	Q652L6	0.809129	0.0396648
201	B8AEF1	0.811559	0.0907651
202	Q8S718	0.811806	0.0155148
203	Q8GRU7	0.811811	0.0526628
204	A2Y3J4	0.81217	0.093528
205	Q9LWJ2	0.812296	0.0867916
206	A2YCF0	0.813695	0.0239087
207	Q5W6F1	0.814366	0.0378207
208	A2XEK9	0.814465	0.065342
209	B8AJJ5	0.81493	0.0907651
210	Q10PW9	0.815184	0.0371743
211	Q8GVF5	0.815247	0.0932056
212	Q5Z589	0.815374	0.036342
213	A2X5P5	0.815584	0.0716029
214	P14717	0.816341	0.00742648
215	Q5VRM0	0.816964	0.0306918
216	B8BF39	0.817097	0.0288363
217	B8AY06	0.817177	0.069129
218	Q6K2L9	0.817448	0.0730537
219	B8AC38	0.817841	0.0452481
220	A2WMZ9	0.81883	0.0481988
221	A2ZFX4	0.820381	0.0448043
222	A1XBB7	0.820944	0.055953
223	Q10HT7	0.821143	0.069129
224	B8B2J2	0.821215	0.0409272
225	B8BBM5	0.821596	0.0140888
226	Q6H800	0.822104	0.0352704
227	Q10K23	0.82315	0.0317731
228	B8ADJ1	0.82364	0.0485337
229	P0C353	0.823867	0.0450654
230	Q75HX0	0.825273	0.0369702
231	Q8H6G8	0.826569	0.0115723
232	P0C539	0.826867	0.0837251
233	A2Y708	0.827152	0.0412405
234	Q5W735	0.828004	0.0084531
235	Q8H3M0	0.831753	0.016081
236	Q0JB49	0.832088	0.0647002
237	Q6AVI7	0.833006	0.0855965
238	Q9LDX7	0.833168	0.0448126
239	A2Z3W4	0.833445	0.03769
240	A2ZN77	0.833775	0.0661608
241	B8B9C4	0.83431	0.0440101
242	Q67UX7	0.834355	0.0511873
243	A2XB64	0.834464	0.0314791
244	Q5VNT9	0.835017	0.0832902
245	Q852G4	0.835455	0.0890747
246	Q69MU0	0.835739	0.0424351
247	B8A7D2	0.835834	0.0416015
248	B8AJA5	0.836004	0.0775509
249	A2WL36	0.836365	0.0307899
250	Q6K680	0.836934	0.0191078
251	Q4LB25	0.837051	0.0417972
252	A2XXG5	0.837101	0.0517021
253	B8BPN4	0.837206	0.0168042
254	Q10RP0	0.838249	0.0802542
255	Q5VRT2	0.83832	0.0210796
256	B8BDS9	0.838369	0.0559114
257	A2XRZ6	0.838588	0.0778089
258	A2Z2U1	0.839615	0.0149152
259	B8ADR9	0.840892	0.0306918
260	H2KWA8	0.841511	0.064679
261	O82451	0.841627	0.00912182
262	Q9FTN5	0.841903	0.0155148
263	Q6ESJ0	0.842431	0.0371748
264	Q2QX21	0.842837	0.0827486
265	Q0DBY0	0.843213	0.0323245
266	Q0JLC0	0.843745	0.0306918
267	Q0JFE2	0.843981	0.0127759
268	Q336W0	0.844043	0.03769
269	A2XN87	0.844507	0.0299427
270	Q6YUH7	0.84459	0.0249189
271	Q2R678	0.844831	0.00768832
272	Q5ZDH9	0.845916	0.0871605
273	B9EXE9	0.845989	0.0103776
274	Q338H2	0.846976	0.094723
275	Q7F1K9	0.847031	0.049641
276	B8B082	0.847066	0.0434674
277	A2Y4M3	0.847707	0.0371743
278	Q1H9B9	0.848143	0.0747735
279	B8BKX0	0.848168	0.0323515
280	Q5JLP6	0.848184	0.0774226
281	Q6K4N0	0.848255	0.0728223
282	Q7XBV2	0.848489	0.0803125
283	B9FWW9	0.850043	0.0614487
284	Q0IXC7	0.850199	0.0254271
285	A2XNF0	0.851392	0.00912182
286	Q84JU8	0.851782	0.0855965
287	B8A9G0	0.851944	0.0751943
288	B8AES5	0.851983	0.0331747
289	A2Y424	0.852287	0.0663802
290	Q852M1	0.852421	0.00940242
291	Q9FTG9	0.852817	0.0552209
292	A2Y9Y3	0.853269	0.0855965
293	A2YXT1	0.854059	0.0460395
294	Q0JJQ7	0.856987	0.0306918
295	Q01KM0	0.857458	0.0282336
296	Q688M9	0.857702	0.0380967
297	Q0D673	0.858731	0.0545752
298	B8ANN3	0.858848	0.0544802
299	Q9LI34	0.859107	0.029665
300	Q5VRH0	0.859695	0.0821805
301	B9FFH1	0.859933	0.0479055
302	Q0JD43	0.860204	0.00834157
303	Q69T78	0.860345	0.0313194
304	Q60EJ3	0.860616	0.069129
305	B8BBC8	0.86066	0.0371743
306	A2ZSU8	0.861023	0.0919017
307	Q84M69	0.861952	0.0925868
308	B8AB01	0.861962	0.02493
309	Q851S9	0.862021	0.0649536
310	B9FD44	0.862922	0.0536253
311	Q6H5Y1	0.863084	0.016081
312	A2YBG8	0.863361	0.0164017
313	B8BDP0	0.863463	0.0782958
314	A3AHY0	0.865531	0.0747735
315	A2XV46	0.865712	0.0251878
316	Q6ZBX8	0.865764	0.0155148
317	A1XFD9	0.865932	0.0469852
318	A2WXV8	0.866258	0.0511873
319	Q69W20	0.86642	0.0698293
320	Q8S1T0	0.866546	0.0169167
321	Q6AUG0	0.866829	0.062197
322	Q10MS5	0.867767	0.0677973
323	B9EWV4	0.868128	0.0855965
324	B9FHX2	0.869064	0.0716117
325	A2Y0X2	0.86992	0.0945096
326	C8TEV8	0.87	0.0317731
327	A3B7K2	0.870496	0.0902632
328	B8BJD1	0.870509	0.0627277
329	B9FVA6	0.870562	0.037356
330	Q2RAK2	0.87107	0.0566186
331	Q8LJ88	0.871082	0.029665
332	B8AQQ2	0.871953	0.0939742
333	P14656	0.872073	0.010248
334	Q8LIF0	0.872698	0.0659921
335	Q7EZN6	0.872881	0.0944001
336	Q10M57	0.873045	0.0323245
337	Q7XXR3	0.873313	0.0995174
338	A2ZAB5	0.87358	0.0744838
339	B8AXL2	0.874255	0.0558387
340	Q2QW46	0.874261	0.0494141
341	P93844	0.875069	0.0855965
342	Q852A3	0.875234	0.0593696
343	Q10N92	0.875394	0.0331727
344	Q7XCR6	0.87751	0.0865203
345	Q2QMG7	0.877785	0.0895185
346	A2YKV3	0.878026	0.069129
347	B9FPF5	0.878363	0.0649775
348	B9FY05	0.878371	0.0378207
349	B8B887	0.879538	0.0388477
350	Q6AVA4	0.879893	0.0509988
351	H9N012	0.880237	0.0511873
352	Q2QME5	0.880367	0.0577228
353	B8AAN6	0.880368	0.0616661
354	Q7XLP7	0.881068	0.0342473
355	Q10RX0	0.881685	0.0449811
356	A2WTS1	0.881987	0.0526599
357	Q40648	0.882332	0.0155148
358	B8A9J6	0.882913	0.0868725
359	Q6ZCF7	0.883733	0.0694858
360	Q01K90	0.884615	0.0558387
361	A2YFW7	0.884812	0.0936383
362	Q6EQX0	0.886072	0.069624
363	Q206Y6	0.886621	0.0550136
364	Q2QLJ0	0.887465	0.0350813
365	Q6K3D4	0.887646	0.0856155
366	Q9AUQ4	0.88781	0.0254271
367	A2YA91	0.887877	0.0238617
368	B8ADH7	0.88892	0.00940242
369	A6N1A8	0.88961	0.0669632
370	Q0DB62	0.890047	0.0350813
371	Q9FU86	0.890742	0.0119783
372	A2YZY5	0.891758	0.0995174
373	Q10P01	0.892722	0.0482997
374	Q0IPE5	0.892732	0.0348248
375	Q7XKB5	0.893148	0.0450654
376	B8A802	0.893299	0.028943
377	Q10CD5	0.893627	0.0601837
378	Q10E03	0.893843	0.0995174
379	Q8H3E9	0.894898	0.0529542
380	B8B2R4	0.895804	0.076684
381	Q7Y152	0.896198	0.069129
382	Q10BJ6	0.896937	0.0228076
383	B9G4P8	0.897256	0.0252522
384	A2XI79	0.899007	0.0599098
385	P29545	0.899361	0.0929577
386	B7EAG5	0.902759	0.0939742
387	Q2R8V6	0.903556	0.0778089
388	Q6K1R5	0.903854	0.066909
389	P52428	0.903964	0.0751943
390	A2Z123	0.904438	0.0323245
391	A2XAM4	0.90447	0.0990127
392	Q94E74	0.904803	0.0677973
393	Q6K3Z3	0.904826	0.093528
394	Q0D715	0.905212	0.030844
395	Q6ZD89	0.906474	0.0484145
396	B8B8I2	0.907468	0.0952496
397	A2XNH4	0.907794	0.018658
