# Supplementary material for: Comparative Proteomic Analysis of Plasma Membrane Proteins in Rice Leaves Reveals a Vesicle Trafficking Network in Plant Immunity That Is Provoked by Blast Fungi
Source: Front Plant Sci. 2022 Apr 25;13:853195. doi: 10.3389/fpls.2022.853195 (PMC9083198; doi:10.3389/fpls.2022.853195)
Supplement: Supplementary file 9 [file Table_9.XLSX]

## Sheet: Sheet1
Supplemental Table S9. GO enrichment analysis of DEPs.
GO_acc	term_type	Term	queryitem	querytotal	bgitem	bgtotal	pvalue	FDR	entries
Up-regulated
GO:0006412	P	translation	39	282	1260	55910	4.6e-19	6.7e-17	// Q6YY64 // Q0D852 // Q7XIK5 // Q6ZI53 // Q2R1J7 // C7IWI9 // B9F773 // Q8L5X0 // Q0D5Z2 // Q6K8U8 // B9FFP1 // Q6I608 // Q10RZ3 // Q6ZLB8 // Q6YS69 // Q69UI1 // Q5KQL4 // A3A0I1 // Q0DJC0 // Q5SNH7 // Q10LN7 // Q2QXN5 // Q6K1Q6 // P49398 // Q6ZGV5 // Q7XZX4 // Q8H2J8 // Q9SDG6 // Q7Y1I5 // Q6K5R6 // Q7XC31 // Q0JAC6 // Q5TKP2 // Q84MQ4 // Q60EY9 // P41095 // Q0IXR7 // Q653V9 // Q8L3Y6
GO:0006810	P	transport	49	282	3435	55910	6.3e-11	4.5e-09	// P50156 // P25766 // Q2R0X0 // Q10DX1 // Q8H4Q9 // Q6AUF8 // Q6Z808 // Q75HK2 // Q5N7P9 // Q0IQK7 // Q0JBY7 // A3BMI4 // Q5QNI2 // Q8RU33 // Q8RZ83 // Q2QLJ6 // Q6YW62 // P40392 // Q75M17 // Q8L6I1 // Q0DJC0 // Q94J09 // Q5JLU1 // Q0IXR7 // Q10P12 // Q6L5I5 // Q8RZQ8 // A2ZVA3 // Q6H883 // Q8H3H8 // Q6YY17 // Q6Z1H2 // Q5SMQ9 // Q6ZHA3 // Q6ZGK3 // Q0DRT9 // Q7XKE9 // Q6ETY0 // Q10QD5 // Q8H567…
GO:0007165	P	signal transduction	22	282	1488	55910	9.7e-06	0.00016	// P25766 // Q94GW8 // Q8H4Q9 // Q6AUF8 // Q6Z808 // Q0DCT6 // Q60EX6 // Q8RZ83 // Q0JDW8 // P40392 // Q75M17 // Q94J09 // Q5JLU1 // Q6Z9G2 // Q5SMQ9 // Q6YY17 // Q942F3 // Q6ZHA3 // Q10QD5 // Q7XQN5 // Q6L502 // Q84TA8
GO:0050896	P	response to stimulus	39	282	4136	55910	0.00014	0.0014	// Q6K4S7 // P25766 // Q94GW8 // Q8H4Q9 // Q6AUF8 // Q6Z808 // B9FYZ4 // Q0DCT6 // Q6YZ10 // Q60EX6 // Q6K209 // Q8RZ83 // Q851R5 // Q0JDW8 // Q7XHB3 // P40392 // C7J2K4 // Q75M17 // Q94J09 // Q5JLU1 // Q6ZJJ1 // Q6Z9G2 // Q942L2 // Q5SMQ9 // Q6YY17 // Q942F3 // Q7XXS5 // Q6ZHA3 // Q10QD5 // Q6ER94 // Q69K73 // Q7XQN5 // Q10N04 // Q0DKF1 // Q6L502 // H2KX19 // Q84SG9 // Q75M08 // Q84TA8
GO:0005198	F	structural molecule activity	44	282	935	55910	2.2e-28	1.3e-26	// Q40665 // Q6YY64 // Q0D852 // Q7XIK5 // Q2R1J7 // C7IWI9 // B9F773 // Q8L5X0 // Q8H7U1 // Q6K8U8 // B9FFP1 // Q6I608 // Q10RZ3 // Q6ZLB8 // Q0D5Z2 // Q69UI1 // Q76FS3 // P45960 // A3A0I1 // Q5KQL4 // Q0DJC0 // Q5SNH7 // Q10LN7 // Q2QXN5 // Q6K1Q6 // P49398 // Q6ZGV5 // Q7XZX4 // Q8H2J8 // Q9SDG6 // Q94DM7 // Q7Y1I5 // Q6K5R6 // Q7XC31 // Q7XKE9 // Q0JAC6 // Q5TKP2 // Q84MQ4 // Q60EY9 // Q43594…
GO:0000166	F	nucleotide binding	79	282	9707	55910	6.6e-06	6.5e-05	// Q8H903 // P25766 // Q0DSB9 // Q0J4H2 // Q94GW8 // A3AQL3 // Q0DJW8 // Q6AUF8 // Q6Z808 // B9FCV6 // Q5N7P9 // Q9LWT6 // Q10BA8 // A3C6H0 // B9FFA3 // Q7XTU1 // Q6YW62 // Q6Z5P1 // Q8L6I1 // Q6ZI53 // Q6L5F3 // Q8H7U1 // Q75LD0 // Q8RZ83 // Q40665 // Q0JDW8 // Q5JMQ3 // P40392 // Q84TA8 // Q76FS3 // P45960 // Q9FVY8 // Q75M17 // A3BP16 // Q0D8D7 // Q94J09 // Q5JLU1 // Q8W5P3 // B9F3C7 // Q94DR2…
GO:0005215	F	transporter activity	25	282	2825	55910	0.0051	0.043	// B9FUS8 // Q2R0X0 // P50156 // Q5N7P9 // Q7XCM9 // Q5QNI2 // Q6YW62 // Q8RU33 // Q8L6I1 // Q0DJC0 // B9F3C7 // Q10P12 // Q6L5I5 // Q8RZQ8 // Q6H883 // Q5SMQ9 // Q8H3H8 // Q6AVV6 // Q0DRT9 // Q6ZCF8 // B9F8Z5 // Q7XLR1 // Q336M5 // Q688W0 // Q8GU64
GO:0016020	C	membrane	121	282	18296	55910	0.00023	0.0014	// B9FUS8 // Q10DX1 // A3AQL3 // P50156 // B9F4P8 // Q84QW4 // Q0JA85 // Q6YW62 // P40392 // A3BP16 // Q0D8D7 // Q8H811 // Q5JLU1 // Q10P12 // Q8H3H8 // Q653U9 // Q7XKE9 // Q6ASY2 // Q653V5 // Q336M5 // B9FAH6 // Q5W723 // Q94GW8 // Q5ZED1 // Q6YT98 // Q5JK39 // Q5N7P9 // B9FBR2 // P49100 // Q655Y4 // B9F0E8 // Q7XCM9 // Q8L6I1 // Q7F1H3 // B9F3C7 // Q6L5I5 // Q6ZFV7 // Q6Z9G2 // Q942F3 // Q6AVM8…
GO:0005737	C	cytoplasm	96	282	6873	55910	3.4e-21	1.3e-19	// Q0IPL3 // P50156 // P35685 // C7IWI9 // Q5JK10 // Q8H7U1 // Q7XC31 // P40392 // P45960 // Q5SNH7 // Q10AC8 // Q10P12 // Q6K9N6 // K4FHN8 // Q942L2 // Q5SMQ9 // Q6Z1H2 // Q94DM7 // Q9SDG6 // Q7XKE9 // Q6ASY2 // B9FW54 // Q84MQ4 // P41095 // Q5W723 // Q653V9 // Q6Z5N4 // Q94GW8 // Q0D852 // Q5ZED1 // Q6Z808 // Q9LWT6 // P49100 // Q8L5X0 // B9FFP1 // Q10RZ3 // Q0D5Z2 // Q69UI1 // Q76FS3 // P49398…
GO:0005886	C	plasma membrane	25	282	1712	55910	2.9e-06	2.2e-05	// Q6K4S7 // P50156 // P25766 // Q94GW8 // Q6YT98 // Q7XTU1 // B9F4P8 // Q0DKF1 // Q851R5 // Q0JDW8 // Q6YW62 // P40392 // Q8L6I1 // Q7F1H3 // Q688W0 // Q5SMQ9 // Q6ATM0 // Q6ZHA3 // Q7XKE9 // Q653V5 // Q7XLR1 // Q6ZFF2 // Q8RZQ8 // B9FAH6 // Q84SG9
Down-regulated
GO:0006810	P	transport	33	243	3435	55910	1.9e-05	0.0017	// Q5VRH0 // B9G2A8 // Q40648 // Q7XWS9 // Q0DQ28 // Q0IXC7 // Q6YUH7 // A2ZVD7 // Q8L4I2 // Q0J328 // Q94DE5 // Q10T50 // Q6ZKF1 // Q5QMU1 // Q9FU86 // Q9FW24 // Q6ZFM7 // Q6K7L5 // Q8H7X7 // Q8GVF5 // Q0J5T2 // A3AHY0 // Q9LI34 // Q8H6G8 // Q6ZCF3 // Q75GA5 // Q5Z9R9 // Q6AVA4 // Q84KJ7 // Q6I5Y4 // Q0DUA4 // Q5JKJ0 // Q10PW9
GO:0051234	P	establishment of localization	33	243	3479	55910	2.4e-05	0.0017	// Q5VRH0 // B9G2A8 // Q40648 // Q7XWS9 // Q0DQ28 // Q0IXC7 // Q6YUH7 // A2ZVD7 // Q8L4I2 // Q0J328 // Q94DE5 // Q10T50 // Q6ZKF1 // Q5QMU1 // Q9FU86 // Q9FW24 // Q6ZFM7 // Q6K7L5 // Q8H7X7 // Q8GVF5 // Q0J5T2 // A3AHY0 // Q9LI34 // Q8H6G8 // Q6ZCF3 // Q75GA5 // Q5Z9R9 // Q6AVA4 // Q84KJ7 // Q6I5Y4 // Q0DUA4 // Q5JKJ0 // Q10PW9
GO:0051179	P	localization	33	243	3522	55910	3.1e-05	0.0017	// Q5VRH0 // B9G2A8 // Q40648 // Q7XWS9 // Q0DQ28 // Q0IXC7 // Q6YUH7 // A2ZVD7 // Q8L4I2 // Q0J328 // Q94DE5 // Q10T50 // Q6ZKF1 // Q5QMU1 // Q9FU86 // Q9FW24 // Q6ZFM7 // Q6K7L5 // Q8H7X7 // Q8GVF5 // Q0J5T2 // A3AHY0 // Q9LI34 // Q8H6G8 // Q6ZCF3 // Q75GA5 // Q5Z9R9 // Q6AVA4 // Q84KJ7 // Q6I5Y4 // Q0DUA4 // Q5JKJ0 // Q10PW9
GO:0044237	P	cellular metabolic process	92	243	15802	55910	0.00078	0.033	// Q10P01 // Q8S718 // Q8GVE1 // Q69TJ1 // Q10L32 // Q5N725 // Q6F321 // P48642 // Q10RX0 // Q69W20 // Q9FE01 // Q8LJ11 // Q69T78 // Q5Z589 // Q75H81 // Q5VNT9 // Q0JFE2 // Q8GVF5 // O82451 // Q10MC6 // Q0E3C3 // Q5JKQ2 // Q8GRU7 // Q2QME5 // Q7XLP7 // Q7XH16 // Q852M1 // Q5VRH4 // Q6AUW7 // Q0IPF7 // Q5W6F1 // Q69RL1 // Q9AUQ4 // Q8LR62 // Q0D715 // Q10E03 // Q6Z481 // Q9LWJ2 // Q6L4R8 // Q2QMG7…
GO:0003824	F	catalytic activity	150	243	25386	55910	2.5e-07	1.7e-05	// Q7XIM0 // Q10P01 // Q7XKB5 // Q8S718 // Q0JD43 // Q69TJ1 // Q10NH1 // Q10L32 // Q5N725 // Q6ESJ0 // Q6F321 // P48642 // B9FY05 // Q10RX0 // B9FM55 // Q4LB25 // Q9FE01 // B9G7R8 // Q10RP0 // Q0D673 // Q69T78 // Q5Z589 // Q5VNT9 // Q0JFE2 // O82451 // Q6K3D4 // Q10MC6 // Q5JKQ2 // Q0IPE5 // Q8GRU7 // Q2QME5 // Q108X4 // Q7XLP7 // Q10BD9 // Q7XH16 // Q67UX7 // Q852M1 // Q7XD67 // Q5VRH4 // Q8GSE8…
GO:0005215	F	transporter activity	28	243	2825	55910	5e-05	0.0017	// Q5VRH0 // Q40648 // Q0DQ28 // Q0IXC7 // Q5W735 // B7EHA8 // Q69L87 // B9FFH1 // Q94DE5 // Q10T50 // Q75GA5 // Q9FU86 // Q5JKJ0 // Q6ZFM7 // Q8H7X7 // E3SC17 // Q0J5T2 // Q9LI34 // A3AJS7 // Q2QLY9 // Q8H6G8 // Q5Z9R9 // Q6AVA4 // Q0J125 // Q84KJ7 // Q0DUA4 // Q6EP35 // Q10PW9
GO:0005737	C	cytoplasm	70	243	6873	55910	6e-12	5.1e-10	// Q5VRH0 // Q7XIM0 // Q852M1 // Q10P01 // Q8S718 // Q7XWS9 // Q6ZFU6 // Q10HT7 // Q0IPF7 // P14656 // Q2QMG7 // A3B7K2 // Q10L32 // Q7XUP7 // Q69RL1 // P14717 // Q6F321 // P48642 // B9FHX2 // Q8LR62 // Q0D715 // Q9FE01 // Q6ZC56 // P29545 // B9FKB1 // Q10E03 // A3C6B8 // Q5QMU1 // Q0E3F2 // Q0DJC4 // Q6ZCF3 // Q8L4I2 // Q8H7X7 // Q6ZD89 // Q93WY5 // Q5VNT9 // Q6ZKF1 // Q8GVF5 // P52428 // Q2QMK8…
GO:0044464	C	cell part	114	243	15353	55910	9.3e-11	4e-09	// Q10P01 // Q8S718 // Q8GVE1 // Q0DQ28 // Q69TJ1 // Q5QMU1 // Q6YUH7 // Q10L32 // Q6F321 // Q0J328 // Q69W20 // Q9FE01 // Q8LJ11 // P29545 // Q5Z589 // Q5VNT9 // Q8GVF5 // O82451 // Q9LI34 // Q10MC6 // Q6K2L9 // Q0E3C3 // Q6Z481 // Q5Z9R9 // Q8GRU7 // Q2QME5 // Q7XLP7 // Q6ZC56 // Q6K680 // Q7XH16 // Q5VRH0 // Q852M1 // Q0IPE5 // Q6AUW7 // Q0IPF7 // Q69RL1 // Q9AUQ4 // Q8LR62 // Q0D715 // A3C6B8…
GO:0005622	C	intracellular	95	243	13390	55910	1.2e-07	2.6e-06	// Q10P01 // Q8S718 // Q8GVE1 // Q69TJ1 // Q5QMU1 // Q6YUH7 // Q10L32 // Q6F321 // Q0J328 // Q9FE01 // Q8LJ11 // P29545 // Q5Z589 // Q5VNT9 // Q8GVF5 // O82451 // Q9LI34 // Q10MC6 // Q6K2L9 // Q0E3C3 // Q6Z481 // Q0IPE5 // Q8GRU7 // Q2QME5 // Q7XLP7 // Q6ZC56 // Q5VRH0 // Q852M1 // Q6AUW7 // Q0IPF7 // Q69RL1 // Q9AUQ4 // Q8LR62 // Q0D715 // Q10E03 // Q5JKQ2 // Q9FW24 // Q8W3N0 // Q8H7X7 // Q6L4R8…
GO:0005886	C	plasma membrane	22	243	1712	55910	7.9e-06	0.00011	// Q7XIM0 // Q0DQ28 // Q0DTS9 // Q0D715 // Q69W20 // Q10T50 // Q8H6G8 // Q75GA5 // Q5JKJ0 // Q6ZFM7 // Q8H7X7 // Q7XH16 // Q5JQW1 // Q0J5T2 // Q5NAG4 // Q0DJL9 // Q84S63 // Q5Z9R9 // Q6AVA4 // Q84KJ7 // Q0DUA4 // Q10PW9
